# Supplementary material for: Class-A penicillin binding proteins do not contribute to cell shape but repair cell-wall defects
Source: eLife journal article supplement (doi:10.7554/elife.51998), 2020-01-06
Supplement: supp [file elife-51998-supp-v1.zip]

Archive with 31 entries (31 files):
- elife_poa_e51998_Figure_4_video_1.avi
- elife_poa_e51998_Figure_1_figure_supplement_5.pdf
- elife_poa_e51998_Figure_3_figure_supplement_3.pdf
- elife_poa_e51998_Supplementary_file_1.xlsx
- elife_poa_e51998_Figure_2_figure_supplement_3.pdf
- elife_poa_e51998_Table_1_source_data_1.xlsx
- elife_poa_e51998_Figure_1_source_data_1.xlsx
- elife_poa_e51998_Figure_2_video_1.avi
- elife_poa_e51998_Figure_3_figure_supplement_6.pdf
- elife_poa_e51998_Figure_1_video_1.avi
- elife_poa_e51998_Figure_1_figure_supplement_2.pdf
- elife_poa_e51998_Figure_3_figure_supplement_1.pdf
- elife_poa_e51998_Figure_3_video_2.avi
- elife_poa_e51998_Figure_1_figure_supplement_3.pdf
- elife_poa_e51998_Figure_3_source_data_1.xlsx
- elife_poa_e51998_Transparent_Reporting_File.docx
- elife_poa_e51998_Figure_3_figure_supplement_7.pdf
- elife_poa_e51998_Figure_4_source_data_1.xlsx
- elife_poa_e51998_Figure_2_figure_supplement_1.pdf
- elife_poa_e51998_Figure_4_figure_supplement_3.pdf
- elife_poa_e51998_Figure_3_figure_supplement_2.pdf
- elife_poa_e51998_Figure_4_figure_supplement_1.pdf
- elife_poa_e51998_Figure_2_source_data_1.xlsx
- elife_poa_e51998_Figure_3_video_1.avi
- elife_poa_e51998_Figure_1_figure_supplement_4.pdf
- elife_poa_e51998_Figure_2_figure_supplement_2.pdf
- elife_poa_e51998_Figure_4_figure_supplement_2.pdf
- elife_poa_e51998_Figure_3_figure_supplement_4.pdf
- elife_poa_e51998_Figure_3_figure_supplement_5.pdf
- elife_poa_e51998_Figure_1_figure_supplement_1.pdf
- elife_poa_e51998_Figure_4_figure_supplement_4.pdf
