# Supplementary material for: Class-A penicillin binding proteins do not contribute to cell shape but repair cell-wall defects
Source: eLife journal article supplement (doi:10.7554/elife.51998), 2020-01-06
Supplement: supp [file elife-51998-supp-v1.zip › elife_poa_e51998_Figure_1_source_data_1.xlsx]

## Sheet: Fig1B
Strain	Guides	Doubling time (min)
AV44	G14-R20	79.438120550664
AV44	G14-R20	73.833948811773
AV51	G14-R20	76.5366015336666
AV51	G14-R20	78.7575683658966
AV51	G14-R20	80.346134997906
AV51	G10-R20	82.3187872506384
AV51	G10-R20	81.6963296415354
AV51	G10-R20	81.1284784161666
AV51	GØ-R20	79.556145873159
AV51	GØ-R20	77.5136975255628
AV51	GØ-R20	78.8735731710204
AV58	GØ-R20	73.3537397937978
AV58	GØ-R20	76.2419008273032
AV58	GØ-R20	74.806266985428
LC69	GØ-R20	75.1044278095194
LC69	GØ-R20	75.0775284903258
LC69	GØ-R20	80.244201023856

## Sheet: Fig1B_raw_curves
Strain	Guides	Time (h)	OD
A44	GØ-RØ	1.02493388888889	0.0187641986062718
A44	GØ-RØ	1.02493388888889	0.0147641986062718
L69	GØ-RØ	1.02493388888889	0.0128980836236934
L69	GØ-RØ	1.02493388888889	0.0148980836236934
L69	GØ-RØ	1.02493388888889	0.0128980836236934
A44	G14-R20	1.02493388888889	0.0153243902439024
A44	G14-R20	1.02493388888889	0.0142243902439024
A58	GØ-R20	1.02493388888889	0.0150065331010453
A58	GØ-R20	1.02493388888889	0.0114065331010453
A58	GØ-R20	1.02493388888889	0.0137065331010453
A51	GØ-R20	1.02493388888889	0.00969006968641115
A51	GØ-R20	1.02493388888889	0.0112900696864111
A51	GØ-R20	1.02493388888889	0.0120900696864111
A51	G10-R20	1.02493388888889	0.0127182926829268
A51	G10-R20	1.02493388888889	0.0154182926829268
A51	G10-R20	1.02493388888889	0.0142182926829268
A51	G14-R20	1.02493388888889	0.0122964285714286
A51	G14-R20	1.02493388888889	0.0118964285714286
A51	G14-R20	1.02493388888889	0.0100964285714286
A44	G20-R20	1.02493388888889	0.0137228222996516
A44	G20-R20	1.02493388888889	0.0104228222996516
A44	G20-R20	1.02493388888889	0.0115228222996516
A44	GØ-RØ	1.06153444444444	0.0192641986062718
A44	GØ-RØ	1.06153444444444	0.0152641986062718
L69	GØ-RØ	1.06153444444444	0.0152980836236934
L69	GØ-RØ	1.06153444444444	0.0132980836236934
L69	GØ-RØ	1.06153444444444	0.0133980836236934
A44	G14-R20	1.06153444444444	0.0158243902439024
A44	G14-R20	1.06153444444444	0.0145243902439024
A58	GØ-R20	1.06153444444444	0.0149065331010453
A58	GØ-R20	1.06153444444444	0.0117065331010453
A58	GØ-R20	1.06153444444444	0.0140065331010453
A51	GØ-R20	1.06153444444444	0.0103900696864112
A51	GØ-R20	1.06153444444444	0.0122900696864112
A51	GØ-R20	1.06153444444444	0.0130900696864111
A51	G10-R20	1.06153444444444	0.0129182926829268
A51	G10-R20	1.06153444444444	0.0159182926829268
A51	G10-R20	1.06153444444444	0.0148182926829268
A51	G14-R20	1.06153444444444	0.0122964285714286
A51	G14-R20	1.06153444444444	0.0122964285714286
A51	G14-R20	1.06153444444444	0.0104964285714286
A44	G20-R20	1.06153444444444	0.0109228222996516
A44	G20-R20	1.06153444444444	0.0140228222996516
A44	G20-R20	1.06153444444444	0.0119228222996516
A44	GØ-RØ	1.09813972222222	0.0198641986062718
A44	GØ-RØ	1.09813972222222	0.0155641986062718
L69	GØ-RØ	1.09813972222222	0.0153980836236934
L69	GØ-RØ	1.09813972222222	0.0135980836236934
L69	GØ-RØ	1.09813972222222	0.0137980836236934
A44	G14-R20	1.09813972222222	0.0161243902439024
A44	G14-R20	1.09813972222222	0.0150243902439024
A58	GØ-R20	1.09813972222222	0.0155065331010453
A58	GØ-R20	1.09813972222222	0.0130065331010453
A58	GØ-R20	1.09813972222222	0.0145065331010453
A51	GØ-R20	1.09813972222222	0.0127900696864112
A51	GØ-R20	1.09813972222222	0.0106900696864111
A51	GØ-R20	1.09813972222222	0.0132900696864112
A51	G10-R20	1.09813972222222	0.0134182926829268
A51	G10-R20	1.09813972222222	0.0161182926829268
A51	G10-R20	1.09813972222222	0.0151182926829268
A51	G14-R20	1.09813972222222	0.0130964285714286
A51	G14-R20	1.09813972222222	0.0134964285714286
A51	G14-R20	1.09813972222222	0.0111964285714286
A44	G20-R20	1.09813972222222	0.0143228222996516
A44	G20-R20	1.09813972222222	0.0113228222996516
A44	G20-R20	1.09813972222222	0.0121228222996516
A44	GØ-RØ	1.134745	0.0204641986062718
A44	GØ-RØ	1.134745	0.0160641986062718
L69	GØ-RØ	1.134745	0.0157980836236934
L69	GØ-RØ	1.134745	0.0142980836236934
L69	GØ-RØ	1.134745	0.0144980836236934
A44	G14-R20	1.134745	0.0165243902439024
A44	G14-R20	1.134745	0.0156243902439024
A58	GØ-R20	1.134745	0.0157065331010453
A58	GØ-R20	1.134745	0.0126065331010453
A58	GØ-R20	1.134745	0.0150065331010453
A51	GØ-R20	1.134745	0.0105900696864111
A51	GØ-R20	1.134745	0.0126900696864111
A51	GØ-R20	1.134745	0.0133900696864111
A51	G10-R20	1.134745	0.0137182926829268
A51	G10-R20	1.134745	0.0166182926829268
A51	G10-R20	1.134745	0.0156182926829268
A51	G14-R20	1.134745	0.0133964285714286
A51	G14-R20	1.134745	0.0131964285714286
A51	G14-R20	1.134745	0.0113964285714286
A44	G20-R20	1.134745	0.0148228222996516
A44	G20-R20	1.134745	0.0117228222996516
A44	G20-R20	1.134745	0.0125228222996516
A44	GØ-RØ	1.17135055555556	0.0208641986062718
A44	GØ-RØ	1.17135055555556	0.0164641986062718
L69	GØ-RØ	1.17135055555556	0.0142980836236934
L69	GØ-RØ	1.17135055555556	0.0161980836236934
L69	GØ-RØ	1.17135055555556	0.0143980836236934
A44	G14-R20	1.17135055555556	0.0169243902439024
A44	G14-R20	1.17135055555556	0.0157243902439024
A58	GØ-R20	1.17135055555556	0.0130065331010453
A58	GØ-R20	1.17135055555556	0.0162065331010453
A58	GØ-R20	1.17135055555556	0.0154065331010453
A51	GØ-R20	1.17135055555556	0.0113900696864112
A51	GØ-R20	1.17135055555556	0.0135900696864111
A51	GØ-R20	1.17135055555556	0.0140900696864111
A51	G10-R20	1.17135055555556	0.0140182926829268
A51	G10-R20	1.17135055555556	0.0168182926829268
A51	G10-R20	1.17135055555556	0.0154182926829268
A51	G14-R20	1.17135055555556	0.0135964285714286
A51	G14-R20	1.17135055555556	0.0138964285714286
A51	G14-R20	1.17135055555556	0.0118964285714286
A44	G20-R20	1.17135055555556	0.0151228222996516
A44	G20-R20	1.17135055555556	0.0118228222996516
A44	G20-R20	1.17135055555556	0.0128228222996516
A44	GØ-RØ	1.20795555555556	0.0217641986062718
A44	GØ-RØ	1.20795555555556	0.0169641986062718
L69	GØ-RØ	1.20795555555556	0.0145980836236934
L69	GØ-RØ	1.20795555555556	0.0164980836236934
L69	GØ-RØ	1.20795555555556	0.0147980836236934
A44	G14-R20	1.20795555555556	0.0172243902439024
A44	G14-R20	1.20795555555556	0.0161243902439024
A58	GØ-R20	1.20795555555556	0.0133065331010453
A58	GØ-R20	1.20795555555556	0.0164065331010453
A58	GØ-R20	1.20795555555556	0.0156065331010453
A51	GØ-R20	1.20795555555556	0.0112900696864111
A51	GØ-R20	1.20795555555556	0.0136900696864111
A51	GØ-R20	1.20795555555556	0.0141900696864111
A51	G10-R20	1.20795555555556	0.0141182926829268
A51	G10-R20	1.20795555555556	0.0171182926829268
A51	G10-R20	1.20795555555556	0.0160182926829268
A51	G14-R20	1.20795555555556	0.0138964285714286
A51	G14-R20	1.20795555555556	0.0138964285714286
A51	G14-R20	1.20795555555556	0.0121964285714286
A44	G20-R20	1.20795555555556	0.0154228222996516
A44	G20-R20	1.20795555555556	0.0123228222996516
A44	G20-R20	1.20795555555556	0.0130228222996516
A44	GØ-RØ	1.24455833333333	0.0222641986062718
A44	GØ-RØ	1.24455833333333	0.0173641986062718
L69	GØ-RØ	1.24455833333333	0.0169980836236934
L69	GØ-RØ	1.24455833333333	0.0153980836236934
L69	GØ-RØ	1.24455833333333	0.0151980836236934
A44	G14-R20	1.24455833333333	0.0174243902439024
A44	G14-R20	1.24455833333333	0.0166243902439024
A58	GØ-R20	1.24455833333333	0.0144065331010453
A58	GØ-R20	1.24455833333333	0.0169065331010453
A58	GØ-R20	1.24455833333333	0.0161065331010453
A51	GØ-R20	1.24455833333333	0.0112900696864111
A51	GØ-R20	1.24455833333333	0.0134900696864111
A51	GØ-R20	1.24455833333333	0.0140900696864111
A51	G10-R20	1.24455833333333	0.0144182926829268
A51	G10-R20	1.24455833333333	0.0174182926829268
A51	G10-R20	1.24455833333333	0.0164182926829268
A51	G14-R20	1.24455833333333	0.0144964285714286
A51	G14-R20	1.24455833333333	0.0141964285714286
A51	G14-R20	1.24455833333333	0.0125964285714286
A44	G20-R20	1.24455833333333	0.0159228222996516
A44	G20-R20	1.24455833333333	0.0128228222996516
A44	G20-R20	1.24455833333333	0.0136228222996516
A44	GØ-RØ	1.28115861111111	0.0226641986062718
A44	GØ-RØ	1.28115861111111	0.0176641986062718
L69	GØ-RØ	1.28115861111111	0.0171980836236934
L69	GØ-RØ	1.28115861111111	0.0155980836236934
L69	GØ-RØ	1.28115861111111	0.0155980836236934
A44	G14-R20	1.28115861111111	0.0179243902439024
A44	G14-R20	1.28115861111111	0.0169243902439024
A58	GØ-R20	1.28115861111111	0.0142065331010453
A58	GØ-R20	1.28115861111111	0.0173065331010453
A58	GØ-R20	1.28115861111111	0.0165065331010453
A51	GØ-R20	1.28115861111111	0.0118900696864112
A51	GØ-R20	1.28115861111111	0.0143900696864111
A51	GØ-R20	1.28115861111111	0.0151900696864112
A51	G10-R20	1.28115861111111	0.0153182926829268
A51	G10-R20	1.28115861111111	0.0180182926829268
A51	G10-R20	1.28115861111111	0.0168182926829268
A51	G14-R20	1.28115861111111	0.0145964285714286
A51	G14-R20	1.28115861111111	0.0144964285714286
A51	G14-R20	1.28115861111111	0.0124964285714286
A44	G20-R20	1.28115861111111	0.0164228222996516
A44	G20-R20	1.28115861111111	0.0133228222996516
A44	G20-R20	1.28115861111111	0.0145228222996516
A44	GØ-RØ	1.31776388888889	0.0230641986062718
A44	GØ-RØ	1.31776388888889	0.0182641986062718
L69	GØ-RØ	1.31776388888889	0.0175980836236934
L69	GØ-RØ	1.31776388888889	0.0161980836236934
L69	GØ-RØ	1.31776388888889	0.0160980836236934
A44	G14-R20	1.31776388888889	0.0185243902439024
A44	G14-R20	1.31776388888889	0.0176243902439024
A58	GØ-R20	1.31776388888889	0.0143065331010453
A58	GØ-R20	1.31776388888889	0.0179065331010453
A58	GØ-R20	1.31776388888889	0.0173065331010453
A51	GØ-R20	1.31776388888889	0.0129900696864111
A51	GØ-R20	1.31776388888889	0.0140900696864111
A51	GØ-R20	1.31776388888889	0.0147900696864112
A51	G10-R20	1.31776388888889	0.0154182926829268
A51	G10-R20	1.31776388888889	0.0186182926829268
A51	G10-R20	1.31776388888889	0.0168182926829268
A51	G14-R20	1.31776388888889	0.0149964285714286
A51	G14-R20	1.31776388888889	0.0151964285714286
A51	G14-R20	1.31776388888889	0.0131964285714286
A44	G20-R20	1.31776388888889	0.0166228222996516
A44	G20-R20	1.31776388888889	0.0135228222996516
A44	G20-R20	1.31776388888889	0.0145228222996516
A44	GØ-RØ	1.35436916666667	0.0238641986062718
A44	GØ-RØ	1.35436916666667	0.0186641986062718
L69	GØ-RØ	1.35436916666667	0.0180980836236934
L69	GØ-RØ	1.35436916666667	0.0165980836236934
L69	GØ-RØ	1.35436916666667	0.0164980836236934
A44	G14-R20	1.35436916666667	0.0188243902439024
A44	G14-R20	1.35436916666667	0.0178243902439024
A58	GØ-R20	1.35436916666667	0.0149065331010453
A58	GØ-R20	1.35436916666667	0.0180065331010453
A58	GØ-R20	1.35436916666667	0.0174065331010453
A51	GØ-R20	1.35436916666667	0.0154900696864111
A51	GØ-R20	1.35436916666667	0.0150900696864111
A51	GØ-R20	1.35436916666667	0.0157900696864111
A51	G10-R20	1.35436916666667	0.0157182926829268
A51	G10-R20	1.35436916666667	0.0192182926829268
A51	G10-R20	1.35436916666667	0.0177182926829268
A51	G14-R20	1.35436916666667	0.0148964285714286
A51	G14-R20	1.35436916666667	0.0148964285714286
A51	G14-R20	1.35436916666667	0.0128964285714286
A44	G20-R20	1.35436916666667	0.0170228222996516
A44	G20-R20	1.35436916666667	0.0141228222996516
A44	G20-R20	1.35436916666667	0.0149228222996516
A44	GØ-RØ	1.39097444444444	0.0244641986062718
A44	GØ-RØ	1.39097444444444	0.0189641986062718
L69	GØ-RØ	1.39097444444444	0.0183980836236934
L69	GØ-RØ	1.39097444444444	0.0166980836236934
L69	GØ-RØ	1.39097444444444	0.0168980836236934
A44	G14-R20	1.39097444444444	0.0191243902439024
A44	G14-R20	1.39097444444444	0.0180243902439024
A58	GØ-R20	1.39097444444444	0.0158065331010453
A58	GØ-R20	1.39097444444444	0.0185065331010453
A58	GØ-R20	1.39097444444444	0.0178065331010453
A51	GØ-R20	1.39097444444444	0.0148900696864111
A51	GØ-R20	1.39097444444444	0.0153900696864111
A51	GØ-R20	1.39097444444444	0.0160900696864111
A51	G10-R20	1.39097444444444	0.0160182926829268
A51	G10-R20	1.39097444444444	0.0191182926829268
A51	G10-R20	1.39097444444444	0.0180182926829268
A51	G14-R20	1.39097444444444	0.0153964285714286
A51	G14-R20	1.39097444444444	0.0156964285714286
A51	G14-R20	1.39097444444444	0.0134964285714286
A44	G20-R20	1.39097444444444	0.0174228222996516
A44	G20-R20	1.39097444444444	0.0143228222996516
A44	G20-R20	1.39097444444444	0.0151228222996516
A44	GØ-RØ	1.42757972222222	0.0250641986062718
A44	GØ-RØ	1.42757972222222	0.0197641986062718
L69	GØ-RØ	1.42757972222222	0.0187980836236934
L69	GØ-RØ	1.42757972222222	0.0172980836236934
L69	GØ-RØ	1.42757972222222	0.0175980836236934
A44	G14-R20	1.42757972222222	0.0196243902439024
A44	G14-R20	1.42757972222222	0.0188243902439024
A58	GØ-R20	1.42757972222222	0.0156065331010453
A58	GØ-R20	1.42757972222222	0.0198065331010453
A58	GØ-R20	1.42757972222222	0.0185065331010453
A51	GØ-R20	1.42757972222222	0.0130900696864111
A51	GØ-R20	1.42757972222222	0.0158900696864111
A51	GØ-R20	1.42757972222222	0.0164900696864111
A51	G10-R20	1.42757972222222	0.0163182926829268
A51	G10-R20	1.42757972222222	0.0196182926829268
A51	G10-R20	1.42757972222222	0.0186182926829268
A51	G14-R20	1.42757972222222	0.0157964285714286
A51	G14-R20	1.42757972222222	0.0158964285714286
A51	G14-R20	1.42757972222222	0.0140964285714286
A44	G20-R20	1.42757972222222	0.0178228222996516
A44	G20-R20	1.42757972222222	0.0150228222996516
A44	G20-R20	1.42757972222222	0.0159228222996516
A44	GØ-RØ	1.464185	0.0258641986062718
A44	GØ-RØ	1.464185	0.0202641986062718
L69	GØ-RØ	1.464185	0.0194980836236934
L69	GØ-RØ	1.464185	0.0177980836236934
L69	GØ-RØ	1.464185	0.0178980836236934
A44	G14-R20	1.464185	0.0201243902439024
A44	G14-R20	1.464185	0.0192243902439024
A58	GØ-R20	1.464185	0.0159065331010453
A58	GØ-R20	1.464185	0.0195065331010453
A58	GØ-R20	1.464185	0.0190065331010453
A51	GØ-R20	1.464185	0.0148900696864111
A51	GØ-R20	1.464185	0.0163900696864111
A51	GØ-R20	1.464185	0.0168900696864111
A51	G10-R20	1.464185	0.0168182926829268
A51	G10-R20	1.464185	0.0198182926829268
A51	G10-R20	1.464185	0.0188182926829268
A51	G14-R20	1.464185	0.0163964285714286
A51	G14-R20	1.464185	0.0164964285714286
A51	G14-R20	1.464185	0.0147964285714286
A44	G20-R20	1.464185	0.0184228222996516
A44	G20-R20	1.464185	0.0157228222996516
A44	G20-R20	1.464185	0.0162228222996516
A44	GØ-RØ	1.50079027777778	0.0263641986062718
A44	GØ-RØ	1.50079027777778	0.0205641986062718
L69	GØ-RØ	1.50079027777778	0.0197980836236934
L69	GØ-RØ	1.50079027777778	0.0182980836236934
L69	GØ-RØ	1.50079027777778	0.0180980836236934
A44	G14-R20	1.50079027777778	0.0205243902439024
A44	G14-R20	1.50079027777778	0.0196243902439024
A58	GØ-R20	1.50079027777778	0.0165065331010453
A58	GØ-R20	1.50079027777778	0.0199065331010453
A58	GØ-R20	1.50079027777778	0.0193065331010453
A51	GØ-R20	1.50079027777778	0.0142900696864112
A51	GØ-R20	1.50079027777778	0.0164900696864111
A51	GØ-R20	1.50079027777778	0.0170900696864111
A51	G10-R20	1.50079027777778	0.0174182926829268
A51	G10-R20	1.50079027777778	0.0205182926829268
A51	G10-R20	1.50079027777778	0.0189182926829268
A51	G14-R20	1.50079027777778	0.0169964285714286
A51	G14-R20	1.50079027777778	0.0169964285714286
A51	G14-R20	1.50079027777778	0.0149964285714286
A44	G20-R20	1.50079027777778	0.0188228222996516
A44	G20-R20	1.50079027777778	0.0157228222996516
A44	G20-R20	1.50079027777778	0.0168228222996516
A44	GØ-RØ	1.537395	0.0269641986062718
A44	GØ-RØ	1.537395	0.0212641986062718
L69	GØ-RØ	1.537395	0.0201980836236934
L69	GØ-RØ	1.537395	0.0188980836236934
L69	GØ-RØ	1.537395	0.0192980836236934
A44	G14-R20	1.537395	0.0214243902439024
A44	G14-R20	1.537395	0.0206243902439024
A58	GØ-R20	1.537395	0.0169065331010453
A58	GØ-R20	1.537395	0.0204065331010453
A58	GØ-R20	1.537395	0.0200065331010453
A51	GØ-R20	1.537395	0.0139900696864111
A51	GØ-R20	1.537395	0.0169900696864111
A51	GØ-R20	1.537395	0.0175900696864111
A51	G10-R20	1.537395	0.0176182926829268
A51	G10-R20	1.537395	0.0206182926829268
A51	G10-R20	1.537395	0.0190182926829268
A51	G14-R20	1.537395	0.0172964285714286
A51	G14-R20	1.537395	0.0178964285714286
A51	G14-R20	1.537395	0.0154964285714286
A44	G20-R20	1.537395	0.0192228222996516
A44	G20-R20	1.537395	0.0160228222996516
A44	G20-R20	1.537395	0.0168228222996516
A44	GØ-RØ	1.57400027777778	0.0278641986062718
A44	GØ-RØ	1.57400027777778	0.0216641986062718
L69	GØ-RØ	1.57400027777778	0.0206980836236934
L69	GØ-RØ	1.57400027777778	0.0191980836236934
L69	GØ-RØ	1.57400027777778	0.0191980836236934
A44	G14-R20	1.57400027777778	0.0214243902439024
A44	G14-R20	1.57400027777778	0.0206243902439024
A58	GØ-R20	1.57400027777778	0.0175065331010453
A58	GØ-R20	1.57400027777778	0.0210065331010453
A58	GØ-R20	1.57400027777778	0.0204065331010453
A51	GØ-R20	1.57400027777778	0.0146900696864112
A51	GØ-R20	1.57400027777778	0.0175900696864111
A51	GØ-R20	1.57400027777778	0.0179900696864111
A51	G10-R20	1.57400027777778	0.0179182926829268
A51	G10-R20	1.57400027777778	0.0212182926829268
A51	G10-R20	1.57400027777778	0.0198182926829268
A51	G14-R20	1.57400027777778	0.0172964285714286
A51	G14-R20	1.57400027777778	0.0177964285714286
A51	G14-R20	1.57400027777778	0.0156964285714286
A44	G20-R20	1.57400027777778	0.0196228222996516
A44	G20-R20	1.57400027777778	0.0177228222996516
A44	G20-R20	1.57400027777778	0.0168228222996516
A44	GØ-RØ	1.61060555555556	0.0284641986062718
A44	GØ-RØ	1.61060555555556	0.0223641986062718
L69	GØ-RØ	1.61060555555556	0.0208980836236934
L69	GØ-RØ	1.61060555555556	0.0195980836236934
L69	GØ-RØ	1.61060555555556	0.0195980836236934
A44	G14-R20	1.61060555555556	0.0220243902439024
A44	G14-R20	1.61060555555556	0.0210243902439024
A58	GØ-R20	1.61060555555556	0.0182065331010453
A58	GØ-R20	1.61060555555556	0.0215065331010453
A58	GØ-R20	1.61060555555556	0.0208065331010453
A51	GØ-R20	1.61060555555556	0.0149900696864111
A51	GØ-R20	1.61060555555556	0.0188900696864111
A51	GØ-R20	1.61060555555556	0.0182900696864111
A51	G10-R20	1.61060555555556	0.0185182926829268
A51	G10-R20	1.61060555555556	0.0204182926829268
A51	G10-R20	1.61060555555556	0.0220182926829268
A51	G14-R20	1.61060555555556	0.0185964285714286
A51	G14-R20	1.61060555555556	0.0179964285714286
A51	G14-R20	1.61060555555556	0.0166964285714286
A44	G20-R20	1.61060555555556	0.0198228222996516
A44	G20-R20	1.61060555555556	0.0179228222996516
A44	G20-R20	1.61060555555556	0.0172228222996516
A44	GØ-RØ	1.64720666666667	0.0291641986062718
A44	GØ-RØ	1.64720666666667	0.0228641986062718
L69	GØ-RØ	1.64720666666667	0.0215980836236934
L69	GØ-RØ	1.64720666666667	0.0205980836236934
L69	GØ-RØ	1.64720666666667	0.0202980836236934
A44	G14-R20	1.64720666666667	0.0227243902439024
A44	G14-R20	1.64720666666667	0.0215243902439024
A58	GØ-R20	1.64720666666667	0.0223065331010453
A58	GØ-R20	1.64720666666667	0.0222065331010453
A58	GØ-R20	1.64720666666667	0.0184065331010453
A51	GØ-R20	1.64720666666667	0.0188900696864111
A51	GØ-R20	1.64720666666667	0.0151900696864112
A51	GØ-R20	1.64720666666667	0.0177900696864111
A51	G10-R20	1.64720666666667	0.0211182926829268
A51	G10-R20	1.64720666666667	0.0189182926829268
A51	G10-R20	1.64720666666667	0.0223182926829268
A51	G14-R20	1.64720666666667	0.0191964285714286
A51	G14-R20	1.64720666666667	0.0185964285714286
A51	G14-R20	1.64720666666667	0.0167964285714286
A44	G20-R20	1.64720666666667	0.0203228222996516
A44	G20-R20	1.64720666666667	0.0189228222996516
A44	G20-R20	1.64720666666667	0.0179228222996516
A44	GØ-RØ	1.68381194444444	0.0297641986062718
A44	GØ-RØ	1.68381194444444	0.0232641986062718
L69	GØ-RØ	1.68381194444444	0.0217980836236934
L69	GØ-RØ	1.68381194444444	0.0210980836236934
L69	GØ-RØ	1.68381194444444	0.0209980836236934
A44	G14-R20	1.68381194444444	0.0230243902439024
A44	G14-R20	1.68381194444444	0.0221243902439024
A58	GØ-R20	1.68381194444444	0.0224065331010453
A58	GØ-R20	1.68381194444444	0.0222065331010453
A58	GØ-R20	1.68381194444444	0.0187065331010453
A51	GØ-R20	1.68381194444444	0.0189900696864111
A51	GØ-R20	1.68381194444444	0.0154900696864111
A51	GØ-R20	1.68381194444444	0.0181900696864112
A51	G10-R20	1.68381194444444	0.0209182926829268
A51	G10-R20	1.68381194444444	0.0191182926829268
A51	G10-R20	1.68381194444444	0.0225182926829268
A51	G14-R20	1.68381194444444	0.0190964285714286
A51	G14-R20	1.68381194444444	0.0190964285714286
A51	G14-R20	1.68381194444444	0.0170964285714286
A44	G20-R20	1.68381194444444	0.0205228222996516
A44	G20-R20	1.68381194444444	0.0187228222996516
A44	G20-R20	1.68381194444444	0.0182228222996516
A44	GØ-RØ	1.72041694444444	0.0307641986062718
A44	GØ-RØ	1.72041694444444	0.0239641986062718
L69	GØ-RØ	1.72041694444444	0.0223980836236934
L69	GØ-RØ	1.72041694444444	0.0213980836236934
L69	GØ-RØ	1.72041694444444	0.0214980836236934
A44	G14-R20	1.72041694444444	0.0233243902439024
A44	G14-R20	1.72041694444444	0.0224243902439024
A58	GØ-R20	1.72041694444444	0.0232065331010453
A58	GØ-R20	1.72041694444444	0.0228065331010453
A58	GØ-R20	1.72041694444444	0.0195065331010453
A51	GØ-R20	1.72041694444444	0.0200900696864112
A51	GØ-R20	1.72041694444444	0.0157900696864111
A51	GØ-R20	1.72041694444444	0.0191900696864111
A51	G10-R20	1.72041694444444	0.0220182926829268
A51	G10-R20	1.72041694444444	0.0198182926829268
A51	G10-R20	1.72041694444444	0.0232182926829268
A51	G14-R20	1.72041694444444	0.0201964285714286
A51	G14-R20	1.72041694444444	0.0199964285714286
A51	G14-R20	1.72041694444444	0.0176964285714286
A44	G20-R20	1.72041694444444	0.0213228222996516
A44	G20-R20	1.72041694444444	0.0195228222996516
A44	G20-R20	1.72041694444444	0.0189228222996516
A44	GØ-RØ	1.7570225	0.0312641986062718
A44	GØ-RØ	1.7570225	0.0245641986062718
L69	GØ-RØ	1.7570225	0.0228980836236934
L69	GØ-RØ	1.7570225	0.0219980836236934
L69	GØ-RØ	1.7570225	0.0222980836236934
A44	G14-R20	1.7570225	0.0236243902439024
A44	G14-R20	1.7570225	0.0229243902439024
A58	GØ-R20	1.7570225	0.0237065331010453
A58	GØ-R20	1.7570225	0.0234065331010453
A58	GØ-R20	1.7570225	0.0199065331010453
A51	GØ-R20	1.7570225	0.0206900696864111
A51	GØ-R20	1.7570225	0.0177900696864111
A51	GØ-R20	1.7570225	0.0195900696864112
A51	G10-R20	1.7570225	0.0223182926829268
A51	G10-R20	1.7570225	0.0200182926829268
A51	G10-R20	1.7570225	0.0237182926829268
A51	G14-R20	1.7570225	0.0195964285714286
A51	G14-R20	1.7570225	0.0195964285714286
A51	G14-R20	1.7570225	0.0175964285714286
A44	G20-R20	1.7570225	0.0217228222996516
A44	G20-R20	1.7570225	0.0201228222996516
A44	G20-R20	1.7570225	0.0194228222996516
A44	GØ-RØ	1.79362277777778	0.0320641986062718
A44	GØ-RØ	1.79362277777778	0.0252641986062718
L69	GØ-RØ	1.79362277777778	0.0234980836236934
L69	GØ-RØ	1.79362277777778	0.0225980836236934
L69	GØ-RØ	1.79362277777778	0.0230980836236934
A44	G14-R20	1.79362277777778	0.0244243902439024
A44	G14-R20	1.79362277777778	0.0236243902439024
A58	GØ-R20	1.79362277777778	0.0241065331010453
A58	GØ-R20	1.79362277777778	0.0241065331010453
A58	GØ-R20	1.79362277777778	0.0206065331010453
A51	GØ-R20	1.79362277777778	0.0211900696864111
A51	GØ-R20	1.79362277777778	0.0169900696864111
A51	GØ-R20	1.79362277777778	0.0200900696864112
A51	G10-R20	1.79362277777778	0.0230182926829268
A51	G10-R20	1.79362277777778	0.0207182926829268
A51	G10-R20	1.79362277777778	0.0241182926829268
A51	G14-R20	1.79362277777778	0.0202964285714286
A51	G14-R20	1.79362277777778	0.0201964285714286
A51	G14-R20	1.79362277777778	0.0181964285714286
A44	G20-R20	1.79362277777778	0.0225228222996516
A44	G20-R20	1.79362277777778	0.0203228222996516
A44	G20-R20	1.79362277777778	0.0203228222996516
A44	GØ-RØ	1.83022805555556	0.0325641986062718
A44	GØ-RØ	1.83022805555556	0.0257641986062718
L69	GØ-RØ	1.83022805555556	0.0238980836236934
L69	GØ-RØ	1.83022805555556	0.0231980836236934
L69	GØ-RØ	1.83022805555556	0.0233980836236934
A44	G14-R20	1.83022805555556	0.0245243902439024
A44	G14-R20	1.83022805555556	0.0240243902439024
A58	GØ-R20	1.83022805555556	0.0245065331010453
A58	GØ-R20	1.83022805555556	0.0245065331010453
A58	GØ-R20	1.83022805555556	0.0209065331010453
A51	GØ-R20	1.83022805555556	0.0215900696864112
A51	GØ-R20	1.83022805555556	0.0191900696864111
A51	GØ-R20	1.83022805555556	0.0204900696864111
A51	G10-R20	1.83022805555556	0.0234182926829268
A51	G10-R20	1.83022805555556	0.0210182926829268
A51	G10-R20	1.83022805555556	0.0244182926829268
A51	G14-R20	1.83022805555556	0.0207964285714286
A51	G14-R20	1.83022805555556	0.0204964285714286
A51	G14-R20	1.83022805555556	0.0186964285714286
A44	G20-R20	1.83022805555556	0.0229228222996516
A44	G20-R20	1.83022805555556	0.0213228222996516
A44	G20-R20	1.83022805555556	0.0206228222996516
A44	GØ-RØ	1.86683333333333	0.0332641986062718
A44	GØ-RØ	1.86683333333333	0.0264641986062718
L69	GØ-RØ	1.86683333333333	0.0245980836236934
L69	GØ-RØ	1.86683333333333	0.0235980836236934
L69	GØ-RØ	1.86683333333333	0.0242980836236934
A44	G14-R20	1.86683333333333	0.0253243902439024
A44	G14-R20	1.86683333333333	0.0244243902439024
A58	GØ-R20	1.86683333333333	0.0251065331010453
A58	GØ-R20	1.86683333333333	0.0253065331010453
A58	GØ-R20	1.86683333333333	0.0214065331010453
A51	GØ-R20	1.86683333333333	0.0221900696864111
A51	GØ-R20	1.86683333333333	0.0179900696864111
A51	GØ-R20	1.86683333333333	0.0207900696864111
A51	G10-R20	1.86683333333333	0.0236182926829268
A51	G10-R20	1.86683333333333	0.0213182926829268
A51	G10-R20	1.86683333333333	0.0249182926829268
A51	G14-R20	1.86683333333333	0.0213964285714286
A51	G14-R20	1.86683333333333	0.0213964285714286
A51	G14-R20	1.86683333333333	0.0195964285714286
A44	G20-R20	1.86683333333333	0.0235228222996516
A44	G20-R20	1.86683333333333	0.0214228222996516
A44	G20-R20	1.86683333333333	0.0211228222996516
A44	GØ-RØ	1.90343861111111	0.0347641986062718
A44	GØ-RØ	1.90343861111111	0.0270641986062718
L69	GØ-RØ	1.90343861111111	0.0250980836236934
L69	GØ-RØ	1.90343861111111	0.0243980836236934
L69	GØ-RØ	1.90343861111111	0.0243980836236934
A44	G14-R20	1.90343861111111	0.0260243902439024
A44	G14-R20	1.90343861111111	0.0251243902439024
A58	GØ-R20	1.90343861111111	0.0259065331010453
A58	GØ-R20	1.90343861111111	0.0259065331010453
A58	GØ-R20	1.90343861111111	0.0220065331010453
A51	GØ-R20	1.90343861111111	0.0222900696864111
A51	GØ-R20	1.90343861111111	0.0180900696864112
A51	GØ-R20	1.90343861111111	0.0212900696864111
A51	G10-R20	1.90343861111111	0.0241182926829268
A51	G10-R20	1.90343861111111	0.0217182926829268
A51	G10-R20	1.90343861111111	0.0256182926829268
A51	G14-R20	1.90343861111111	0.0221964285714286
A51	G14-R20	1.90343861111111	0.0216964285714286
A51	G14-R20	1.90343861111111	0.0200964285714286
A44	G20-R20	1.90343861111111	0.0239228222996516
A44	G20-R20	1.90343861111111	0.0221228222996516
A44	G20-R20	1.90343861111111	0.0216228222996516
A44	GØ-RØ	1.94004388888889	0.0346641986062718
A44	GØ-RØ	1.94004388888889	0.0276641986062718
L69	GØ-RØ	1.94004388888889	0.0253980836236934
L69	GØ-RØ	1.94004388888889	0.0245980836236934
L69	GØ-RØ	1.94004388888889	0.0250980836236934
A44	G14-R20	1.94004388888889	0.0265243902439024
A44	G14-R20	1.94004388888889	0.0256243902439024
A58	GØ-R20	1.94004388888889	0.0268065331010453
A58	GØ-R20	1.94004388888889	0.0266065331010453
A58	GØ-R20	1.94004388888889	0.0231065331010453
A51	GØ-R20	1.94004388888889	0.0188900696864111
A51	GØ-R20	1.94004388888889	0.0227900696864111
A51	GØ-R20	1.94004388888889	0.0218900696864111
A51	G10-R20	1.94004388888889	0.0248182926829268
A51	G10-R20	1.94004388888889	0.0224182926829268
A51	G10-R20	1.94004388888889	0.0261182926829268
A51	G14-R20	1.94004388888889	0.0223964285714286
A51	G14-R20	1.94004388888889	0.0221964285714286
A51	G14-R20	1.94004388888889	0.0203964285714286
A44	G20-R20	1.94004388888889	0.0244228222996516
A44	G20-R20	1.94004388888889	0.0227228222996516
A44	G20-R20	1.94004388888889	0.0223228222996516
A44	GØ-RØ	1.97664916666667	0.0357641986062718
A44	GØ-RØ	1.97664916666667	0.0283641986062718
L69	GØ-RØ	1.97664916666667	0.0260980836236934
L69	GØ-RØ	1.97664916666667	0.0254980836236934
L69	GØ-RØ	1.97664916666667	0.0255980836236934
A44	G14-R20	1.97664916666667	0.0269243902439024
A44	G14-R20	1.97664916666667	0.0262243902439024
A58	GØ-R20	1.97664916666667	0.0271065331010453
A58	GØ-R20	1.97664916666667	0.0272065331010453
A58	GØ-R20	1.97664916666667	0.0232065331010453
A51	GØ-R20	1.97664916666667	0.0192900696864111
A51	GØ-R20	1.97664916666667	0.0236900696864111
A51	GØ-R20	1.97664916666667	0.0226900696864111
A51	G10-R20	1.97664916666667	0.0255182926829268
A51	G10-R20	1.97664916666667	0.0230182926829268
A51	G10-R20	1.97664916666667	0.0267182926829268
A51	G14-R20	1.97664916666667	0.0232964285714286
A51	G14-R20	1.97664916666667	0.0222964285714286
A51	G14-R20	1.97664916666667	0.0210964285714286
A44	G20-R20	1.97664916666667	0.0252228222996516
A44	G20-R20	1.97664916666667	0.0233228222996516
A44	G20-R20	1.97664916666667	0.0228228222996516
A44	GØ-RØ	2.01325888888889	0.0362641986062718
A44	GØ-RØ	2.01325888888889	0.0290641986062718
L69	GØ-RØ	2.01325888888889	0.0269980836236934
L69	GØ-RØ	2.01325888888889	0.0260980836236934
L69	GØ-RØ	2.01325888888889	0.0262980836236934
A44	G14-R20	2.01325888888889	0.0276243902439024
A44	G14-R20	2.01325888888889	0.0268243902439024
A58	GØ-R20	2.01325888888889	0.0283065331010453
A58	GØ-R20	2.01325888888889	0.0278065331010453
A58	GØ-R20	2.01325888888889	0.0238065331010453
A51	GØ-R20	2.01325888888889	0.0197900696864111
A51	GØ-R20	2.01325888888889	0.0237900696864111
A51	GØ-R20	2.01325888888889	0.0226900696864111
A51	G10-R20	2.01325888888889	0.0260182926829268
A51	G10-R20	2.01325888888889	0.0236182926829268
A51	G10-R20	2.01325888888889	0.0273182926829268
A51	G14-R20	2.01325888888889	0.0240964285714286
A51	G14-R20	2.01325888888889	0.0234964285714286
A51	G14-R20	2.01325888888889	0.0221964285714286
A44	G20-R20	2.01325888888889	0.0258228222996516
A44	G20-R20	2.01325888888889	0.0238228222996516
A44	G20-R20	2.01325888888889	0.0234228222996516
A44	GØ-RØ	2.04986361111111	0.0373641986062718
A44	GØ-RØ	2.04986361111111	0.0297641986062718
L69	GØ-RØ	2.04986361111111	0.0275980836236934
L69	GØ-RØ	2.04986361111111	0.0267980836236934
L69	GØ-RØ	2.04986361111111	0.0268980836236934
A44	G14-R20	2.04986361111111	0.0283243902439024
A44	G14-R20	2.04986361111111	0.0273243902439024
A58	GØ-R20	2.04986361111111	0.0285065331010453
A58	GØ-R20	2.04986361111111	0.0285065331010453
A58	GØ-R20	2.04986361111111	0.0244065331010453
A51	GØ-R20	2.04986361111111	0.0199900696864111
A51	GØ-R20	2.04986361111111	0.0244900696864112
A51	GØ-R20	2.04986361111111	0.0232900696864111
A51	G10-R20	2.04986361111111	0.0265182926829268
A51	G10-R20	2.04986361111111	0.0240182926829268
A51	G10-R20	2.04986361111111	0.0279182926829268
A51	G14-R20	2.04986361111111	0.0248964285714286
A51	G14-R20	2.04986361111111	0.0243964285714286
A51	G14-R20	2.04986361111111	0.0227964285714286
A44	G20-R20	2.04986361111111	0.0263228222996516
A44	G20-R20	2.04986361111111	0.0249228222996516
A44	G20-R20	2.04986361111111	0.0241228222996516
A44	GØ-RØ	2.08646888888889	0.0380641986062718
A44	GØ-RØ	2.08646888888889	0.0304641986062718
L69	GØ-RØ	2.08646888888889	0.0279980836236934
L69	GØ-RØ	2.08646888888889	0.0274980836236934
L69	GØ-RØ	2.08646888888889	0.0274980836236934
A44	G14-R20	2.08646888888889	0.0286243902439024
A44	G14-R20	2.08646888888889	0.0279243902439024
A58	GØ-R20	2.08646888888889	0.0291065331010453
A58	GØ-R20	2.08646888888889	0.0291065331010453
A58	GØ-R20	2.08646888888889	0.0249065331010453
A51	GØ-R20	2.08646888888889	0.0208900696864111
A51	GØ-R20	2.08646888888889	0.0251900696864111
A51	GØ-R20	2.08646888888889	0.0238900696864112
A51	G10-R20	2.08646888888889	0.0270182926829268
A51	G10-R20	2.08646888888889	0.0246182926829268
A51	G10-R20	2.08646888888889	0.0283182926829268
A51	G14-R20	2.08646888888889	0.0245964285714286
A51	G14-R20	2.08646888888889	0.0238964285714286
A51	G14-R20	2.08646888888889	0.0228964285714286
A44	G20-R20	2.08646888888889	0.0269228222996516
A44	G20-R20	2.08646888888889	0.0253228222996516
A44	G20-R20	2.08646888888889	0.0246228222996516
A44	GØ-RØ	2.12307416666667	0.0402641986062718
A44	GØ-RØ	2.12307416666667	0.0310641986062718
L69	GØ-RØ	2.12307416666667	0.0284980836236934
L69	GØ-RØ	2.12307416666667	0.0276980836236934
L69	GØ-RØ	2.12307416666667	0.0279980836236934
A44	G14-R20	2.12307416666667	0.0292243902439024
A44	G14-R20	2.12307416666667	0.0286243902439024
A58	GØ-R20	2.12307416666667	0.0295065331010453
A58	GØ-R20	2.12307416666667	0.0295065331010453
A58	GØ-R20	2.12307416666667	0.0255065331010453
A51	GØ-R20	2.12307416666667	0.0214900696864112
A51	GØ-R20	2.12307416666667	0.0258900696864112
A51	GØ-R20	2.12307416666667	0.0246900696864111
A51	G10-R20	2.12307416666667	0.0279182926829268
A51	G10-R20	2.12307416666667	0.0248182926829268
A51	G10-R20	2.12307416666667	0.0291182926829268
A51	G14-R20	2.12307416666667	0.0249964285714286
A51	G14-R20	2.12307416666667	0.0242964285714286
A51	G14-R20	2.12307416666667	0.0232964285714286
A44	G20-R20	2.12307416666667	0.0274228222996516
A44	G20-R20	2.12307416666667	0.0258228222996516
A44	G20-R20	2.12307416666667	0.0252228222996516
A44	GØ-RØ	2.15967944444444	0.0400641986062718
A44	GØ-RØ	2.15967944444444	0.0316641986062718
L69	GØ-RØ	2.15967944444444	0.0290980836236934
L69	GØ-RØ	2.15967944444444	0.0283980836236934
L69	GØ-RØ	2.15967944444444	0.0288980836236934
A44	G14-R20	2.15967944444444	0.0296243902439024
A44	G14-R20	2.15967944444444	0.0290243902439024
A58	GØ-R20	2.15967944444444	0.0309065331010453
A58	GØ-R20	2.15967944444444	0.0305065331010453
A58	GØ-R20	2.15967944444444	0.0262065331010453
A51	GØ-R20	2.15967944444444	0.0233900696864111
A51	GØ-R20	2.15967944444444	0.0263900696864112
A51	GØ-R20	2.15967944444444	0.0250900696864111
A51	G10-R20	2.15967944444444	0.0283182926829268
A51	G10-R20	2.15967944444444	0.0255182926829268
A51	G10-R20	2.15967944444444	0.0296182926829268
A51	G14-R20	2.15967944444444	0.0259964285714286
A51	G14-R20	2.15967944444444	0.0253964285714286
A51	G14-R20	2.15967944444444	0.0242964285714286
A44	G20-R20	2.15967944444444	0.0279228222996516
A44	G20-R20	2.15967944444444	0.0261228222996516
A44	G20-R20	2.15967944444444	0.0260228222996516
A44	GØ-RØ	2.19628472222222	0.0406641986062718
A44	GØ-RØ	2.19628472222222	0.0322641986062718
L69	GØ-RØ	2.19628472222222	0.0295980836236934
L69	GØ-RØ	2.19628472222222	0.0291980836236934
L69	GØ-RØ	2.19628472222222	0.0294980836236934
A44	G14-R20	2.19628472222222	0.0302243902439024
A44	G14-R20	2.19628472222222	0.0298243902439024
A58	GØ-R20	2.19628472222222	0.0311065331010453
A58	GØ-R20	2.19628472222222	0.0311065331010453
A58	GØ-R20	2.19628472222222	0.0287065331010453
A51	GØ-R20	2.19628472222222	0.0225900696864111
A51	GØ-R20	2.19628472222222	0.0267900696864111
A51	GØ-R20	2.19628472222222	0.0254900696864111
A51	G10-R20	2.19628472222222	0.0302182926829268
A51	G10-R20	2.19628472222222	0.0289182926829268
A51	G10-R20	2.19628472222222	0.0262182926829268
A51	G14-R20	2.19628472222222	0.0264964285714286
A51	G14-R20	2.19628472222222	0.0253964285714286
A51	G14-R20	2.19628472222222	0.0242964285714286
A44	G20-R20	2.19628472222222	0.0285228222996516
A44	G20-R20	2.19628472222222	0.0269228222996516
A44	G20-R20	2.19628472222222	0.0269228222996516
A44	GØ-RØ	2.23288555555556	0.0419641986062718
A44	GØ-RØ	2.23288555555556	0.0329641986062718
L69	GØ-RØ	2.23288555555556	0.0301980836236934
L69	GØ-RØ	2.23288555555556	0.0297980836236934
L69	GØ-RØ	2.23288555555556	0.0299980836236934
A44	G14-R20	2.23288555555556	0.0306243902439024
A44	G14-R20	2.23288555555556	0.0303243902439024
A58	GØ-R20	2.23288555555556	0.0319065331010453
A58	GØ-R20	2.23288555555556	0.0317065331010453
A58	GØ-R20	2.23288555555556	0.0275065331010453
A51	GØ-R20	2.23288555555556	0.0241900696864111
A51	GØ-R20	2.23288555555556	0.0275900696864111
A51	GØ-R20	2.23288555555556	0.0261900696864111
A51	G10-R20	2.23288555555556	0.0308182926829268
A51	G10-R20	2.23288555555556	0.0293182926829268
A51	G10-R20	2.23288555555556	0.0269182926829268
A51	G14-R20	2.23288555555556	0.0272964285714286
A51	G14-R20	2.23288555555556	0.0264964285714286
A51	G14-R20	2.23288555555556	0.0252964285714286
A44	G20-R20	2.23288555555556	0.0292228222996516
A44	G20-R20	2.23288555555556	0.0274228222996516
A44	G20-R20	2.23288555555556	0.0270228222996516
A44	GØ-RØ	2.26949083333333	0.0428641986062718
A44	GØ-RØ	2.26949083333333	0.0337641986062718
L69	GØ-RØ	2.26949083333333	0.0309980836236934
L69	GØ-RØ	2.26949083333333	0.0305980836236934
L69	GØ-RØ	2.26949083333333	0.0309980836236934
A44	G14-R20	2.26949083333333	0.0311243902439024
A44	G14-R20	2.26949083333333	0.0314243902439024
A58	GØ-R20	2.26949083333333	0.0324065331010453
A58	GØ-R20	2.26949083333333	0.0323065331010453
A58	GØ-R20	2.26949083333333	0.0281065331010453
A51	GØ-R20	2.26949083333333	0.0266900696864111
A51	GØ-R20	2.26949083333333	0.0278900696864111
A51	GØ-R20	2.26949083333333	0.0263900696864112
A51	G10-R20	2.26949083333333	0.0312182926829268
A51	G10-R20	2.26949083333333	0.0298182926829268
A51	G10-R20	2.26949083333333	0.0272182926829268
A51	G14-R20	2.26949083333333	0.0280964285714286
A51	G14-R20	2.26949083333333	0.0268964285714286
A51	G14-R20	2.26949083333333	0.0256964285714286
A44	G20-R20	2.26949083333333	0.0297228222996516
A44	G20-R20	2.26949083333333	0.0279228222996516
A44	G20-R20	2.26949083333333	0.0276228222996516
A44	GØ-RØ	2.30609555555556	0.0441641986062718
A44	GØ-RØ	2.30609555555556	0.0342641986062718
L69	GØ-RØ	2.30609555555556	0.0314980836236934
L69	GØ-RØ	2.30609555555556	0.0312980836236934
L69	GØ-RØ	2.30609555555556	0.0312980836236934
A44	G14-R20	2.30609555555556	0.0314243902439024
A44	G14-R20	2.30609555555556	0.0320243902439024
A58	GØ-R20	2.30609555555556	0.0329065331010453
A58	GØ-R20	2.30609555555556	0.0334065331010453
A58	GØ-R20	2.30609555555556	0.0287065331010453
A51	GØ-R20	2.30609555555556	0.0263900696864112
A51	GØ-R20	2.30609555555556	0.0282900696864112
A51	GØ-R20	2.30609555555556	0.0266900696864111
A51	G10-R20	2.30609555555556	0.0322182926829268
A51	G10-R20	2.30609555555556	0.0307182926829268
A51	G10-R20	2.30609555555556	0.0278182926829268
A51	G14-R20	2.30609555555556	0.0280964285714286
A51	G14-R20	2.30609555555556	0.0270964285714286
A51	G14-R20	2.30609555555556	0.0262964285714286
A44	G20-R20	2.30609555555556	0.0303228222996516
A44	G20-R20	2.30609555555556	0.0285228222996516
A44	G20-R20	2.30609555555556	0.0282228222996516
A44	GØ-RØ	2.34270083333333	0.0449641986062718
A44	GØ-RØ	2.34270083333333	0.0351641986062718
L69	GØ-RØ	2.34270083333333	0.0319980836236934
L69	GØ-RØ	2.34270083333333	0.0316980836236934
L69	GØ-RØ	2.34270083333333	0.0318980836236934
A44	G14-R20	2.34270083333333	0.0323243902439024
A44	G14-R20	2.34270083333333	0.0327243902439024
A58	GØ-R20	2.34270083333333	0.0337065331010453
A58	GØ-R20	2.34270083333333	0.0339065331010453
A58	GØ-R20	2.34270083333333	0.0293065331010453
A51	GØ-R20	2.34270083333333	0.0243900696864112
A51	GØ-R20	2.34270083333333	0.0290900696864111
A51	GØ-R20	2.34270083333333	0.0278900696864111
A51	G10-R20	2.34270083333333	0.0327182926829268
A51	G10-R20	2.34270083333333	0.0312182926829268
A51	G10-R20	2.34270083333333	0.0282182926829268
A51	G14-R20	2.34270083333333	0.0285964285714286
A51	G14-R20	2.34270083333333	0.0276964285714286
A51	G14-R20	2.34270083333333	0.0266964285714286
A44	G20-R20	2.34270083333333	0.0306228222996516
A44	G20-R20	2.34270083333333	0.0293228222996516
A44	G20-R20	2.34270083333333	0.0290228222996516
A44	GØ-RØ	2.37930611111111	0.0462641986062718
A44	GØ-RØ	2.37930611111111	0.0357641986062718
L69	GØ-RØ	2.37930611111111	0.0325980836236934
L69	GØ-RØ	2.37930611111111	0.0323980836236934
L69	GØ-RØ	2.37930611111111	0.0325980836236934
A44	G14-R20	2.37930611111111	0.0328243902439024
A44	G14-R20	2.37930611111111	0.0332243902439024
A58	GØ-R20	2.37930611111111	0.0346065331010453
A58	GØ-R20	2.37930611111111	0.0345065331010453
A58	GØ-R20	2.37930611111111	0.0299065331010453
A51	GØ-R20	2.37930611111111	0.0248900696864112
A51	GØ-R20	2.37930611111111	0.0297900696864112
A51	GØ-R20	2.37930611111111	0.0283900696864111
A51	G10-R20	2.37930611111111	0.0333182926829268
A51	G10-R20	2.37930611111111	0.0318182926829268
A51	G10-R20	2.37930611111111	0.0288182926829268
A51	G14-R20	2.37930611111111	0.0291964285714286
A51	G14-R20	2.37930611111111	0.0281964285714286
A51	G14-R20	2.37930611111111	0.0273964285714286
A44	G20-R20	2.37930611111111	0.0312228222996516
A44	G20-R20	2.37930611111111	0.0296228222996516
A44	G20-R20	2.37930611111111	0.0294228222996516
A44	GØ-RØ	2.41591138888889	0.0473641986062718
A44	GØ-RØ	2.41591138888889	0.0367641986062718
L69	GØ-RØ	2.41591138888889	0.0331980836236934
L69	GØ-RØ	2.41591138888889	0.0332980836236934
L69	GØ-RØ	2.41591138888889	0.0333980836236934
A44	G14-R20	2.41591138888889	0.0336243902439024
A44	G14-R20	2.41591138888889	0.0336243902439024
A58	GØ-R20	2.41591138888889	0.0351065331010453
A58	GØ-R20	2.41591138888889	0.0356065331010453
A58	GØ-R20	2.41591138888889	0.0333065331010453
A51	GØ-R20	2.41591138888889	0.0253900696864112
A51	GØ-R20	2.41591138888889	0.0305900696864111
A51	GØ-R20	2.41591138888889	0.0286900696864111
A51	G10-R20	2.41591138888889	0.0338182926829268
A51	G10-R20	2.41591138888889	0.0324182926829268
A51	G10-R20	2.41591138888889	0.0293182926829268
A51	G14-R20	2.41591138888889	0.0299964285714286
A51	G14-R20	2.41591138888889	0.0291964285714286
A51	G14-R20	2.41591138888889	0.0282964285714286
A44	G20-R20	2.41591138888889	0.0317228222996516
A44	G20-R20	2.41591138888889	0.0304228222996516
A44	G20-R20	2.41591138888889	0.0302228222996516
A44	GØ-RØ	2.45251222222222	0.0484641986062718
A44	GØ-RØ	2.45251222222222	0.0375641986062718
L69	GØ-RØ	2.45251222222222	0.0339980836236934
L69	GØ-RØ	2.45251222222222	0.0340980836236934
L69	GØ-RØ	2.45251222222222	0.0340980836236934
A44	G14-R20	2.45251222222222	0.0342243902439024
A44	G14-R20	2.45251222222222	0.0343243902439024
A58	GØ-R20	2.45251222222222	0.0360065331010453
A58	GØ-R20	2.45251222222222	0.0362065331010453
A58	GØ-R20	2.45251222222222	0.0320065331010453
A51	GØ-R20	2.45251222222222	0.0260900696864111
A51	GØ-R20	2.45251222222222	0.0316900696864112
A51	GØ-R20	2.45251222222222	0.0299900696864111
A51	G10-R20	2.45251222222222	0.0345182926829268
A51	G10-R20	2.45251222222222	0.0331182926829268
A51	G10-R20	2.45251222222222	0.0299182926829268
A51	G14-R20	2.45251222222222	0.0304964285714286
A51	G14-R20	2.45251222222222	0.0293964285714286
A51	G14-R20	2.45251222222222	0.0283964285714286
A44	G20-R20	2.45251222222222	0.0325228222996516
A44	G20-R20	2.45251222222222	0.0313228222996516
A44	G20-R20	2.45251222222222	0.0312228222996516
A44	GØ-RØ	2.4891175	0.0502641986062718
A44	GØ-RØ	2.4891175	0.0382641986062718
L69	GØ-RØ	2.4891175	0.0343980836236934
L69	GØ-RØ	2.4891175	0.0346980836236934
L69	GØ-RØ	2.4891175	0.0349980836236934
A44	G14-R20	2.4891175	0.0348243902439024
A44	G14-R20	2.4891175	0.0346243902439024
A58	GØ-R20	2.4891175	0.0365065331010453
A58	GØ-R20	2.4891175	0.0369065331010453
A58	GØ-R20	2.4891175	0.0321065331010453
A51	GØ-R20	2.4891175	0.0266900696864111
A51	GØ-R20	2.4891175	0.0317900696864111
A51	GØ-R20	2.4891175	0.0300900696864111
A51	G10-R20	2.4891175	0.0352182926829268
A51	G10-R20	2.4891175	0.0339182926829268
A51	G10-R20	2.4891175	0.0305182926829268
A51	G14-R20	2.4891175	0.0314964285714286
A51	G14-R20	2.4891175	0.0299964285714286
A51	G14-R20	2.4891175	0.0290964285714286
A44	G20-R20	2.4891175	0.0331228222996516
A44	G20-R20	2.4891175	0.0319228222996516
A44	G20-R20	2.4891175	0.0318228222996516
A44	GØ-RØ	2.52571833333333	0.0512641986062718
A44	GØ-RØ	2.52571833333333	0.0389641986062718
L69	GØ-RØ	2.52571833333333	0.0350980836236934
L69	GØ-RØ	2.52571833333333	0.0355980836236934
L69	GØ-RØ	2.52571833333333	0.0357980836236934
A44	G14-R20	2.52571833333333	0.0361243902439024
A44	G14-R20	2.52571833333333	0.0357243902439024
A58	GØ-R20	2.52571833333333	0.0380065331010453
A58	GØ-R20	2.52571833333333	0.0386065331010453
A58	GØ-R20	2.52571833333333	0.0330065331010453
A51	GØ-R20	2.52571833333333	0.0296900696864111
A51	GØ-R20	2.52571833333333	0.0330900696864111
A51	GØ-R20	2.52571833333333	0.0313900696864111
A51	G10-R20	2.52571833333333	0.0359182926829268
A51	G10-R20	2.52571833333333	0.0345182926829268
A51	G10-R20	2.52571833333333	0.0314182926829268
A51	G14-R20	2.52571833333333	0.0325964285714286
A51	G14-R20	2.52571833333333	0.0310964285714286
A51	G14-R20	2.52571833333333	0.0298964285714286
A44	G20-R20	2.52571833333333	0.0337228222996516
A44	G20-R20	2.52571833333333	0.0326228222996516
A44	G20-R20	2.52571833333333	0.0324228222996516
A44	GØ-RØ	2.56232777777778	0.0522641986062718
A44	GØ-RØ	2.56232777777778	0.0398641986062718
L69	GØ-RØ	2.56232777777778	0.0357980836236934
L69	GØ-RØ	2.56232777777778	0.0364980836236934
L69	GØ-RØ	2.56232777777778	0.0364980836236934
A44	G14-R20	2.56232777777778	0.0362243902439024
A44	G14-R20	2.56232777777778	0.0362243902439024
A58	GØ-R20	2.56232777777778	0.0381065331010453
A58	GØ-R20	2.56232777777778	0.0388065331010453
A58	GØ-R20	2.56232777777778	0.0334065331010453
A51	GØ-R20	2.56232777777778	0.0275900696864111
A51	GØ-R20	2.56232777777778	0.0327900696864111
A51	GØ-R20	2.56232777777778	0.0313900696864111
A51	G10-R20	2.56232777777778	0.0366182926829268
A51	G10-R20	2.56232777777778	0.0348182926829268
A51	G10-R20	2.56232777777778	0.0317182926829268
A51	G14-R20	2.56232777777778	0.0325964285714286
A51	G14-R20	2.56232777777778	0.0315964285714286
A51	G14-R20	2.56232777777778	0.0302964285714286
A44	G20-R20	2.56232777777778	0.0345228222996516
A44	G20-R20	2.56232777777778	0.0334228222996516
A44	G20-R20	2.56232777777778	0.0331228222996516
A44	GØ-RØ	2.59893277777778	0.0536641986062718
A44	GØ-RØ	2.59893277777778	0.0408641986062718
L69	GØ-RØ	2.59893277777778	0.0365980836236934
L69	GØ-RØ	2.59893277777778	0.0372980836236934
L69	GØ-RØ	2.59893277777778	0.0373980836236934
A44	G14-R20	2.59893277777778	0.0374243902439024
A44	G14-R20	2.59893277777778	0.0371243902439024
A58	GØ-R20	2.59893277777778	0.0393065331010453
A58	GØ-R20	2.59893277777778	0.0395065331010453
A58	GØ-R20	2.59893277777778	0.0344065331010453
A51	GØ-R20	2.59893277777778	0.0282900696864112
A51	GØ-R20	2.59893277777778	0.0337900696864111
A51	GØ-R20	2.59893277777778	0.0316900696864112
A51	G10-R20	2.59893277777778	0.0371182926829268
A51	G10-R20	2.59893277777778	0.0354182926829268
A51	G10-R20	2.59893277777778	0.0325182926829268
A51	G14-R20	2.59893277777778	0.0339964285714286
A51	G14-R20	2.59893277777778	0.0324964285714286
A51	G14-R20	2.59893277777778	0.0313964285714286
A44	G20-R20	2.59893277777778	0.0350228222996516
A44	G20-R20	2.59893277777778	0.0340228222996516
A44	G20-R20	2.59893277777778	0.0339228222996516
A44	GØ-RØ	2.63553805555556	0.0549641986062718
A44	GØ-RØ	2.63553805555556	0.0416641986062718
L69	GØ-RØ	2.63553805555556	0.0372980836236934
L69	GØ-RØ	2.63553805555556	0.0377980836236934
L69	GØ-RØ	2.63553805555556	0.0381980836236934
A44	G14-R20	2.63553805555556	0.0379243902439024
A44	G14-R20	2.63553805555556	0.0378243902439024
A58	GØ-R20	2.63553805555556	0.0398065331010453
A58	GØ-R20	2.63553805555556	0.0407065331010453
A58	GØ-R20	2.63553805555556	0.0354065331010453
A51	GØ-R20	2.63553805555556	0.0306900696864112
A51	GØ-R20	2.63553805555556	0.0348900696864111
A51	GØ-R20	2.63553805555556	0.0328900696864111
A51	G10-R20	2.63553805555556	0.0381182926829268
A51	G10-R20	2.63553805555556	0.0364182926829268
A51	G10-R20	2.63553805555556	0.0334182926829268
A51	G14-R20	2.63553805555556	0.0350964285714286
A51	G14-R20	2.63553805555556	0.0327964285714286
A51	G14-R20	2.63553805555556	0.0316964285714286
A44	G20-R20	2.63553805555556	0.0359228222996516
A44	G20-R20	2.63553805555556	0.0346228222996516
A44	G20-R20	2.63553805555556	0.0349228222996516
A44	GØ-RØ	2.67214333333333	0.0548641986062718
A44	GØ-RØ	2.67214333333333	0.0426641986062718
L69	GØ-RØ	2.67214333333333	0.0378980836236934
L69	GØ-RØ	2.67214333333333	0.0386980836236934
L69	GØ-RØ	2.67214333333333	0.0390980836236934
A44	G14-R20	2.67214333333333	0.0386243902439024
A44	G14-R20	2.67214333333333	0.0383243902439024
A58	GØ-R20	2.67214333333333	0.0407065331010453
A58	GØ-R20	2.67214333333333	0.0416065331010453
A58	GØ-R20	2.67214333333333	0.0359065331010453
A51	GØ-R20	2.67214333333333	0.0293900696864111
A51	GØ-R20	2.67214333333333	0.0354900696864111
A51	GØ-R20	2.67214333333333	0.0332900696864111
A51	G10-R20	2.67214333333333	0.0388182926829268
A51	G10-R20	2.67214333333333	0.0369182926829268
A51	G10-R20	2.67214333333333	0.0339182926829268
A51	G14-R20	2.67214333333333	0.0344964285714286
A51	G14-R20	2.67214333333333	0.0334964285714286
A51	G14-R20	2.67214333333333	0.0322964285714286
A44	G20-R20	2.67214333333333	0.0366228222996516
A44	G20-R20	2.67214333333333	0.0352228222996516
A44	G20-R20	2.67214333333333	0.0354228222996516
A44	GØ-RØ	2.70874861111111	0.0562641986062718
A44	GØ-RØ	2.70874861111111	0.0432641986062718
L69	GØ-RØ	2.70874861111111	0.0387980836236934
L69	GØ-RØ	2.70874861111111	0.0396980836236934
L69	GØ-RØ	2.70874861111111	0.0405980836236934
A44	G14-R20	2.70874861111111	0.0395243902439024
A44	G14-R20	2.70874861111111	0.0390243902439024
A58	GØ-R20	2.70874861111111	0.0419065331010453
A58	GØ-R20	2.70874861111111	0.0422065331010453
A58	GØ-R20	2.70874861111111	0.0365065331010453
A51	GØ-R20	2.70874861111111	0.0300900696864111
A51	GØ-R20	2.70874861111111	0.0361900696864111
A51	GØ-R20	2.70874861111111	0.0341900696864111
A51	G10-R20	2.70874861111111	0.0397182926829268
A51	G10-R20	2.70874861111111	0.0378182926829268
A51	G10-R20	2.70874861111111	0.0346182926829268
A51	G14-R20	2.70874861111111	0.0360964285714286
A51	G14-R20	2.70874861111111	0.0338964285714286
A51	G14-R20	2.70874861111111	0.0327964285714286
A44	G20-R20	2.70874861111111	0.0372228222996516
A44	G20-R20	2.70874861111111	0.0365228222996516
A44	G20-R20	2.70874861111111	0.0362228222996516
A44	GØ-RØ	2.74535388888889	0.0571641986062718
A44	GØ-RØ	2.74535388888889	0.0441641986062718
L69	GØ-RØ	2.74535388888889	0.0394980836236934
L69	GØ-RØ	2.74535388888889	0.0402980836236934
L69	GØ-RØ	2.74535388888889	0.0409980836236934
A44	G14-R20	2.74535388888889	0.0403243902439025
A44	G14-R20	2.74535388888889	0.0398243902439025
A58	GØ-R20	2.74535388888889	0.0426065331010453
A58	GØ-R20	2.74535388888889	0.0434065331010453
A58	GØ-R20	2.74535388888889	0.0376065331010453
A51	GØ-R20	2.74535388888889	0.0309900696864111
A51	GØ-R20	2.74535388888889	0.0371900696864111
A51	GØ-R20	2.74535388888889	0.0351900696864111
A51	G10-R20	2.74535388888889	0.0403182926829268
A51	G10-R20	2.74535388888889	0.0388182926829268
A51	G10-R20	2.74535388888889	0.0358182926829268
A51	G14-R20	2.74535388888889	0.0365964285714286
A51	G14-R20	2.74535388888889	0.0350964285714286
A51	G14-R20	2.74535388888889	0.0337964285714286
A44	G20-R20	2.74535388888889	0.0380228222996516
A44	G20-R20	2.74535388888889	0.0370228222996516
A44	G20-R20	2.74535388888889	0.0370228222996516
A44	GØ-RØ	2.78195861111111	0.0583641986062718
A44	GØ-RØ	2.78195861111111	0.0452641986062718
L69	GØ-RØ	2.78195861111111	0.0398980836236934
L69	GØ-RØ	2.78195861111111	0.0410980836236934
L69	GØ-RØ	2.78195861111111	0.0412980836236934
A44	G14-R20	2.78195861111111	0.0412243902439024
A44	G14-R20	2.78195861111111	0.0406243902439025
A58	GØ-R20	2.78195861111111	0.0433065331010453
A58	GØ-R20	2.78195861111111	0.0441065331010453
A58	GØ-R20	2.78195861111111	0.0378065331010453
A51	GØ-R20	2.78195861111111	0.0314900696864111
A51	GØ-R20	2.78195861111111	0.0378900696864111
A51	GØ-R20	2.78195861111111	0.0358900696864111
A51	G10-R20	2.78195861111111	0.0411182926829268
A51	G10-R20	2.78195861111111	0.0396182926829268
A51	G10-R20	2.78195861111111	0.0361182926829268
A51	G14-R20	2.78195861111111	0.0372964285714286
A51	G14-R20	2.78195861111111	0.0353964285714286
A51	G14-R20	2.78195861111111	0.0342964285714286
A44	G20-R20	2.78195861111111	0.0384228222996516
A44	G20-R20	2.78195861111111	0.0376228222996516
A44	G20-R20	2.78195861111111	0.0379228222996516
A44	GØ-RØ	2.81856388888889	0.0592641986062718
A44	GØ-RØ	2.81856388888889	0.0460641986062718
L69	GØ-RØ	2.81856388888889	0.0410980836236934
L69	GØ-RØ	2.81856388888889	0.0419980836236934
L69	GØ-RØ	2.81856388888889	0.0426980836236934
A44	G14-R20	2.81856388888889	0.0420243902439024
A44	G14-R20	2.81856388888889	0.0412243902439024
A58	GØ-R20	2.81856388888889	0.0391065331010453
A58	GØ-R20	2.81856388888889	0.0441065331010453
A58	GØ-R20	2.81856388888889	0.0452065331010453
A51	GØ-R20	2.81856388888889	0.0363900696864111
A51	GØ-R20	2.81856388888889	0.0382900696864111
A51	GØ-R20	2.81856388888889	0.0318900696864111
A51	G10-R20	2.81856388888889	0.0363182926829268
A51	G10-R20	2.81856388888889	0.0396182926829268
A51	G10-R20	2.81856388888889	0.0416182926829268
A51	G14-R20	2.81856388888889	0.0390964285714286
A51	G14-R20	2.81856388888889	0.0363964285714286
A51	G14-R20	2.81856388888889	0.0353964285714286
A44	G20-R20	2.81856388888889	0.0389228222996516
A44	G20-R20	2.81856388888889	0.0383228222996516
A44	G20-R20	2.81856388888889	0.0383228222996516
A44	GØ-RØ	2.85516916666667	0.0610641986062718
A44	GØ-RØ	2.85516916666667	0.0473641986062718
L69	GØ-RØ	2.85516916666667	0.0417980836236934
L69	GØ-RØ	2.85516916666667	0.0430980836236934
L69	GØ-RØ	2.85516916666667	0.0434980836236934
A44	G14-R20	2.85516916666667	0.0429243902439024
A44	G14-R20	2.85516916666667	0.0420243902439024
A58	GØ-R20	2.85516916666667	0.0400065331010453
A58	GØ-R20	2.85516916666667	0.0453065331010453
A58	GØ-R20	2.85516916666667	0.0461065331010453
A51	GØ-R20	2.85516916666667	0.0394900696864112
A51	GØ-R20	2.85516916666667	0.0368900696864111
A51	GØ-R20	2.85516916666667	0.0329900696864111
A51	G10-R20	2.85516916666667	0.0425182926829268
A51	G10-R20	2.85516916666667	0.0371182926829268
A51	G10-R20	2.85516916666667	0.0409182926829268
A51	G14-R20	2.85516916666667	0.0399964285714286
A51	G14-R20	2.85516916666667	0.0372964285714286
A51	G14-R20	2.85516916666667	0.0359964285714286
A44	G20-R20	2.85516916666667	0.0400228222996516
A44	G20-R20	2.85516916666667	0.0392228222996516
A44	G20-R20	2.85516916666667	0.0396228222996516
A44	GØ-RØ	2.89177444444444	0.0628641986062718
A44	GØ-RØ	2.89177444444444	0.0479641986062718
L69	GØ-RØ	2.89177444444444	0.0424980836236934
L69	GØ-RØ	2.89177444444444	0.0437980836236934
L69	GØ-RØ	2.89177444444444	0.0446980836236934
A44	G14-R20	2.89177444444444	0.0436243902439025
A44	G14-R20	2.89177444444444	0.0426243902439025
A58	GØ-R20	2.89177444444444	0.0407065331010453
A58	GØ-R20	2.89177444444444	0.0461065331010453
A58	GØ-R20	2.89177444444444	0.0473065331010453
A51	GØ-R20	2.89177444444444	0.0403900696864111
A51	GØ-R20	2.89177444444444	0.0381900696864111
A51	GØ-R20	2.89177444444444	0.0345900696864112
A51	G10-R20	2.89177444444444	0.0435182926829268
A51	G10-R20	2.89177444444444	0.0384182926829268
A51	G10-R20	2.89177444444444	0.0419182926829268
A51	G14-R20	2.89177444444444	0.0392964285714286
A51	G14-R20	2.89177444444444	0.0376964285714286
A51	G14-R20	2.89177444444444	0.0364964285714286
A44	G20-R20	2.89177444444444	0.0408228222996516
A44	G20-R20	2.89177444444444	0.0401228222996516
A44	G20-R20	2.89177444444444	0.0408228222996516
A44	GØ-RØ	2.92837555555556	0.0628641986062718
A44	GØ-RØ	2.92837555555556	0.0490641986062718
L69	GØ-RØ	2.92837555555556	0.0430980836236934
L69	GØ-RØ	2.92837555555556	0.0446980836236934
L69	GØ-RØ	2.92837555555556	0.0450980836236934
A44	G14-R20	2.92837555555556	0.0449243902439024
A44	G14-R20	2.92837555555556	0.0436243902439025
A58	GØ-R20	2.92837555555556	0.0416065331010453
A58	GØ-R20	2.92837555555556	0.0470065331010453
A58	GØ-R20	2.92837555555556	0.0481065331010453
A51	GØ-R20	2.92837555555556	0.0410900696864111
A51	GØ-R20	2.92837555555556	0.0385900696864111
A51	GØ-R20	2.92837555555556	0.0363900696864111
A51	G10-R20	2.92837555555556	0.0440182926829268
A51	G10-R20	2.92837555555556	0.0387182926829268
A51	G10-R20	2.92837555555556	0.0442182926829268
A51	G14-R20	2.92837555555556	0.0399964285714286
A51	G14-R20	2.92837555555556	0.0384964285714286
A51	G14-R20	2.92837555555556	0.0374964285714286
A44	G20-R20	2.92837555555556	0.0412228222996516
A44	G20-R20	2.92837555555556	0.0409228222996516
A44	G20-R20	2.92837555555556	0.0410228222996516
A44	GØ-RØ	2.96498083333333	0.0644641986062718
A44	GØ-RØ	2.96498083333333	0.0501641986062718
L69	GØ-RØ	2.96498083333333	0.0441980836236934
L69	GØ-RØ	2.96498083333333	0.0457980836236934
L69	GØ-RØ	2.96498083333333	0.0460980836236934
A44	G14-R20	2.96498083333333	0.0458243902439024
A44	G14-R20	2.96498083333333	0.0443243902439024
A58	GØ-R20	2.96498083333333	0.0426065331010453
A58	GØ-R20	2.96498083333333	0.0480065331010453
A58	GØ-R20	2.96498083333333	0.0492065331010453
A51	GØ-R20	2.96498083333333	0.0416900696864112
A51	GØ-R20	2.96498083333333	0.0392900696864111
A51	GØ-R20	2.96498083333333	0.0348900696864111
A51	G10-R20	2.96498083333333	0.0449182926829268
A51	G10-R20	2.96498083333333	0.0394182926829268
A51	G10-R20	2.96498083333333	0.0430182926829268
A51	G14-R20	2.96498083333333	0.0417964285714286
A51	G14-R20	2.96498083333333	0.0390964285714286
A51	G14-R20	2.96498083333333	0.0380964285714286
A44	G20-R20	2.96498083333333	0.0421228222996516
A44	G20-R20	2.96498083333333	0.0416228222996516
A44	G20-R20	2.96498083333333	0.0420228222996516
A44	GØ-RØ	3.00158166666667	0.0664641986062718
A44	GØ-RØ	3.00158166666667	0.0512641986062718
L69	GØ-RØ	3.00158166666667	0.0449980836236934
L69	GØ-RØ	3.00158166666667	0.0465980836236934
L69	GØ-RØ	3.00158166666667	0.0468980836236934
A44	G14-R20	3.00158166666667	0.0466243902439025
A44	G14-R20	3.00158166666667	0.0452243902439024
A58	GØ-R20	3.00158166666667	0.0444065331010453
A58	GØ-R20	3.00158166666667	0.0488065331010453
A58	GØ-R20	3.00158166666667	0.0504065331010453
A51	GØ-R20	3.00158166666667	0.0426900696864111
A51	GØ-R20	3.00158166666667	0.0404900696864112
A51	GØ-R20	3.00158166666667	0.0369900696864112
A51	G10-R20	3.00158166666667	0.0460182926829268
A51	G10-R20	3.00158166666667	0.0403182926829268
A51	G10-R20	3.00158166666667	0.0440182926829268
A51	G14-R20	3.00158166666667	0.0418964285714286
A51	G14-R20	3.00158166666667	0.0397964285714286
A51	G14-R20	3.00158166666667	0.0389964285714286
A44	G20-R20	3.00158166666667	0.0432228222996516
A44	G20-R20	3.00158166666667	0.0425228222996516
A44	G20-R20	3.00158166666667	0.0430228222996516
A44	GØ-RØ	3.03818666666667	0.0676641986062718
A44	GØ-RØ	3.03818666666667	0.0523641986062718
L69	GØ-RØ	3.03818666666667	0.0456980836236934
L69	GØ-RØ	3.03818666666667	0.0472980836236934
L69	GØ-RØ	3.03818666666667	0.0477980836236934
A44	G14-R20	3.03818666666667	0.0472243902439024
A44	G14-R20	3.03818666666667	0.0459243902439024
A58	GØ-R20	3.03818666666667	0.0442065331010453
A58	GØ-R20	3.03818666666667	0.0498065331010453
A58	GØ-R20	3.03818666666667	0.0509065331010453
A51	GØ-R20	3.03818666666667	0.0435900696864111
A51	GØ-R20	3.03818666666667	0.0411900696864112
A51	GØ-R20	3.03818666666667	0.0363900696864111
A51	G10-R20	3.03818666666667	0.0464182926829268
A51	G10-R20	3.03818666666667	0.0410182926829268
A51	G10-R20	3.03818666666667	0.0450182926829268
A51	G14-R20	3.03818666666667	0.0430964285714286
A51	G14-R20	3.03818666666667	0.0406964285714286
A51	G14-R20	3.03818666666667	0.0399964285714286
A44	G20-R20	3.03818666666667	0.0437228222996516
A44	G20-R20	3.03818666666667	0.0433228222996516
A44	G20-R20	3.03818666666667	0.0440228222996516
A44	GØ-RØ	3.07479194444444	0.0690641986062718
A44	GØ-RØ	3.07479194444444	0.0534641986062718
L69	GØ-RØ	3.07479194444444	0.0467980836236934
L69	GØ-RØ	3.07479194444444	0.0486980836236934
L69	GØ-RØ	3.07479194444444	0.0486980836236934
A44	G14-R20	3.07479194444444	0.0483243902439024
A44	G14-R20	3.07479194444444	0.0469243902439025
A58	GØ-R20	3.07479194444444	0.0458065331010453
A58	GØ-R20	3.07479194444444	0.0507065331010453
A58	GØ-R20	3.07479194444444	0.0524065331010453
A51	GØ-R20	3.07479194444444	0.0447900696864112
A51	GØ-R20	3.07479194444444	0.0421900696864111
A51	GØ-R20	3.07479194444444	0.0374900696864112
A51	G10-R20	3.07479194444444	0.0472182926829268
A51	G10-R20	3.07479194444444	0.0420182926829268
A51	G10-R20	3.07479194444444	0.0456182926829268
A51	G14-R20	3.07479194444444	0.0436964285714286
A51	G14-R20	3.07479194444444	0.0418964285714286
A51	G14-R20	3.07479194444444	0.0411964285714286
A44	G20-R20	3.07479194444444	0.0449228222996516
A44	G20-R20	3.07479194444444	0.0443228222996516
A44	G20-R20	3.07479194444444	0.0446228222996516
A44	GØ-RØ	3.11139722222222	0.0707641986062718
A44	GØ-RØ	3.11139722222222	0.0545641986062718
L69	GØ-RØ	3.11139722222222	0.0476980836236934
L69	GØ-RØ	3.11139722222222	0.0496980836236934
L69	GØ-RØ	3.11139722222222	0.0498980836236934
A44	G14-R20	3.11139722222222	0.0492243902439024
A44	G14-R20	3.11139722222222	0.0477243902439024
A58	GØ-R20	3.11139722222222	0.0463065331010453
A58	GØ-R20	3.11139722222222	0.0519065331010453
A58	GØ-R20	3.11139722222222	0.0534065331010453
A51	GØ-R20	3.11139722222222	0.0453900696864111
A51	GØ-R20	3.11139722222222	0.0427900696864112
A51	GØ-R20	3.11139722222222	0.0377900696864111
A51	G10-R20	3.11139722222222	0.0483182926829268
A51	G10-R20	3.11139722222222	0.0426182926829268
A51	G10-R20	3.11139722222222	0.0466182926829268
A51	G14-R20	3.11139722222222	0.0450964285714286
A51	G14-R20	3.11139722222222	0.0424964285714286
A51	G14-R20	3.11139722222222	0.0414964285714286
A44	G20-R20	3.11139722222222	0.0453228222996516
A44	G20-R20	3.11139722222222	0.0450228222996516
A44	G20-R20	3.11139722222222	0.0458228222996516
A44	GØ-RØ	3.1480025	0.0728641986062718
A44	GØ-RØ	3.1480025	0.0556641986062718
L69	GØ-RØ	3.1480025	0.0484980836236934
L69	GØ-RØ	3.1480025	0.0504980836236934
L69	GØ-RØ	3.1480025	0.0510980836236934
A44	G14-R20	3.1480025	0.0502243902439024
A44	G14-R20	3.1480025	0.0486243902439024
A58	GØ-R20	3.1480025	0.0470065331010453
A58	GØ-R20	3.1480025	0.0534065331010453
A58	GØ-R20	3.1480025	0.0546065331010453
A51	GØ-R20	3.1480025	0.0464900696864112
A51	GØ-R20	3.1480025	0.0436900696864111
A51	GØ-R20	3.1480025	0.0386900696864111
A51	G10-R20	3.1480025	0.0495182926829268
A51	G10-R20	3.1480025	0.0437182926829268
A51	G10-R20	3.1480025	0.0474182926829268
A51	G14-R20	3.1480025	0.0458964285714286
A51	G14-R20	3.1480025	0.0434964285714286
A51	G14-R20	3.1480025	0.0422964285714286
A44	G20-R20	3.1480025	0.0465228222996516
A44	G20-R20	3.1480025	0.0462228222996516
A44	G20-R20	3.1480025	0.0470228222996516
A44	GØ-RØ	3.18460333333333	0.0741641986062718
A44	GØ-RØ	3.18460333333333	0.0567641986062718
L69	GØ-RØ	3.18460333333333	0.0493980836236934
L69	GØ-RØ	3.18460333333333	0.0517980836236934
L69	GØ-RØ	3.18460333333333	0.0520980836236934
A44	G14-R20	3.18460333333333	0.0513243902439024
A44	G14-R20	3.18460333333333	0.0494243902439025
A58	GØ-R20	3.18460333333333	0.0482065331010453
A58	GØ-R20	3.18460333333333	0.0540065331010453
A58	GØ-R20	3.18460333333333	0.0558065331010453
A51	GØ-R20	3.18460333333333	0.0470900696864111
A51	GØ-R20	3.18460333333333	0.0444900696864112
A51	GØ-R20	3.18460333333333	0.0393900696864111
A51	G10-R20	3.18460333333333	0.0500182926829268
A51	G10-R20	3.18460333333333	0.0444182926829268
A51	G10-R20	3.18460333333333	0.0480182926829268
A51	G14-R20	3.18460333333333	0.0461964285714286
A51	G14-R20	3.18460333333333	0.0444964285714286
A51	G14-R20	3.18460333333333	0.0433964285714286
A44	G20-R20	3.18460333333333	0.0473228222996516
A44	G20-R20	3.18460333333333	0.0470228222996516
A44	G20-R20	3.18460333333333	0.0479228222996516
A44	GØ-RØ	3.22121305555556	0.0790641986062718
A44	GØ-RØ	3.22121305555556	0.0579641986062718
L69	GØ-RØ	3.22121305555556	0.0504980836236934
L69	GØ-RØ	3.22121305555556	0.0525980836236934
L69	GØ-RØ	3.22121305555556	0.0530980836236934
A44	G14-R20	3.22121305555556	0.0523243902439024
A44	G14-R20	3.22121305555556	0.0506243902439024
A58	GØ-R20	3.22121305555556	0.0490065331010453
A58	GØ-R20	3.22121305555556	0.0549065331010453
A58	GØ-R20	3.22121305555556	0.0567065331010453
A51	GØ-R20	3.22121305555556	0.0400900696864111
A51	GØ-R20	3.22121305555556	0.0480900696864111
A51	GØ-R20	3.22121305555556	0.0451900696864111
A51	G10-R20	3.22121305555556	0.0510182926829268
A51	G10-R20	3.22121305555556	0.0452182926829268
A51	G10-R20	3.22121305555556	0.0490182926829268
A51	G14-R20	3.22121305555556	0.0470964285714286
A51	G14-R20	3.22121305555556	0.0453964285714286
A51	G14-R20	3.22121305555556	0.0442964285714286
A44	G20-R20	3.22121305555556	0.0481228222996516
A44	G20-R20	3.22121305555556	0.0478228222996516
A44	G20-R20	3.22121305555556	0.0488228222996516
A44	GØ-RØ	3.25781388888889	0.0803641986062718
A44	GØ-RØ	3.25781388888889	0.0591641986062718
L69	GØ-RØ	3.25781388888889	0.0512980836236934
L69	GØ-RØ	3.25781388888889	0.0537980836236934
L69	GØ-RØ	3.25781388888889	0.0538980836236934
A44	G14-R20	3.25781388888889	0.0539243902439025
A44	G14-R20	3.25781388888889	0.0517243902439024
A58	GØ-R20	3.25781388888889	0.0502065331010453
A58	GØ-R20	3.25781388888889	0.0564065331010453
A58	GØ-R20	3.25781388888889	0.0580065331010453
A51	GØ-R20	3.25781388888889	0.0409900696864112
A51	GØ-R20	3.25781388888889	0.0489900696864111
A51	GØ-R20	3.25781388888889	0.0463900696864111
A51	G10-R20	3.25781388888889	0.0521182926829268
A51	G10-R20	3.25781388888889	0.0460182926829268
A51	G10-R20	3.25781388888889	0.0497182926829268
A51	G14-R20	3.25781388888889	0.0479964285714286
A51	G14-R20	3.25781388888889	0.0458964285714286
A51	G14-R20	3.25781388888889	0.0448964285714286
A44	G20-R20	3.25781388888889	0.0488228222996516
A44	G20-R20	3.25781388888889	0.0489228222996516
A44	G20-R20	3.25781388888889	0.0495228222996516
A44	GØ-RØ	3.29441861111111	0.0796641986062718
A44	GØ-RØ	3.29441861111111	0.0602641986062718
L69	GØ-RØ	3.29441861111111	0.0523980836236934
L69	GØ-RØ	3.29441861111111	0.0545980836236934
L69	GØ-RØ	3.29441861111111	0.0553980836236934
A44	G14-R20	3.29441861111111	0.0544243902439024
A44	G14-R20	3.29441861111111	0.0524243902439025
A58	GØ-R20	3.29441861111111	0.0511065331010453
A58	GØ-R20	3.29441861111111	0.0574065331010453
A58	GØ-R20	3.29441861111111	0.0593065331010453
A51	GØ-R20	3.29441861111111	0.0420900696864111
A51	GØ-R20	3.29441861111111	0.0500900696864112
A51	GØ-R20	3.29441861111111	0.0472900696864112
A51	G10-R20	3.29441861111111	0.0530182926829268
A51	G10-R20	3.29441861111111	0.0469182926829268
A51	G10-R20	3.29441861111111	0.0510182926829268
A51	G14-R20	3.29441861111111	0.0489964285714286
A51	G14-R20	3.29441861111111	0.0468964285714286
A51	G14-R20	3.29441861111111	0.0458964285714286
A44	G20-R20	3.29441861111111	0.0501228222996516
A44	G20-R20	3.29441861111111	0.0500228222996516
A44	G20-R20	3.29441861111111	0.0506228222996516
A44	GØ-RØ	3.33102361111111	0.0807641986062718
A44	GØ-RØ	3.33102361111111	0.0616641986062718
L69	GØ-RØ	3.33102361111111	0.0532980836236934
L69	GØ-RØ	3.33102361111111	0.0557980836236934
L69	GØ-RØ	3.33102361111111	0.0563980836236934
A44	G14-R20	3.33102361111111	0.0557243902439025
A44	G14-R20	3.33102361111111	0.0534243902439025
A58	GØ-R20	3.33102361111111	0.0522065331010453
A58	GØ-R20	3.33102361111111	0.0585065331010453
A58	GØ-R20	3.33102361111111	0.0603065331010453
A51	GØ-R20	3.33102361111111	0.0424900696864112
A51	GØ-R20	3.33102361111111	0.0506900696864111
A51	GØ-R20	3.33102361111111	0.0475900696864111
A51	G10-R20	3.33102361111111	0.0541182926829268
A51	G10-R20	3.33102361111111	0.0479182926829268
A51	G10-R20	3.33102361111111	0.0518182926829268
A51	G14-R20	3.33102361111111	0.0496964285714286
A51	G14-R20	3.33102361111111	0.0474964285714286
A51	G14-R20	3.33102361111111	0.0465964285714286
A44	G20-R20	3.33102361111111	0.0510228222996516
A44	G20-R20	3.33102361111111	0.0510228222996516
A44	G20-R20	3.33102361111111	0.0516228222996516
A44	GØ-RØ	3.36762888888889	0.0825641986062718
A44	GØ-RØ	3.36762888888889	0.0631641986062718
L69	GØ-RØ	3.36762888888889	0.0543980836236934
L69	GØ-RØ	3.36762888888889	0.0572980836236934
L69	GØ-RØ	3.36762888888889	0.0573980836236934
A44	G14-R20	3.36762888888889	0.0571243902439024
A44	G14-R20	3.36762888888889	0.0546243902439024
A58	GØ-R20	3.36762888888889	0.0535065331010453
A58	GØ-R20	3.36762888888889	0.0598065331010453
A58	GØ-R20	3.36762888888889	0.0617065331010453
A51	GØ-R20	3.36762888888889	0.0454900696864112
A51	GØ-R20	3.36762888888889	0.0520900696864112
A51	GØ-R20	3.36762888888889	0.0490900696864112
A51	G10-R20	3.36762888888889	0.0553182926829268
A51	G10-R20	3.36762888888889	0.0488182926829268
A51	G10-R20	3.36762888888889	0.0530182926829268
A51	G14-R20	3.36762888888889	0.0508964285714286
A51	G14-R20	3.36762888888889	0.0485964285714286
A51	G14-R20	3.36762888888889	0.0477964285714286
A44	G20-R20	3.36762888888889	0.0520228222996516
A44	G20-R20	3.36762888888889	0.0523228222996516
A44	G20-R20	3.36762888888889	0.0530228222996516
A44	GØ-RØ	3.40423416666667	0.0842641986062718
A44	GØ-RØ	3.40423416666667	0.0641641986062718
L69	GØ-RØ	3.40423416666667	0.0553980836236934
L69	GØ-RØ	3.40423416666667	0.0581980836236934
L69	GØ-RØ	3.40423416666667	0.0585980836236934
A44	G14-R20	3.40423416666667	0.0582243902439025
A44	G14-R20	3.40423416666667	0.0558243902439024
A58	GØ-R20	3.40423416666667	0.0546065331010453
A58	GØ-R20	3.40423416666667	0.0617065331010453
A58	GØ-R20	3.40423416666667	0.0633065331010453
A51	GØ-R20	3.40423416666667	0.0479900696864112
A51	GØ-R20	3.40423416666667	0.0528900696864111
A51	GØ-R20	3.40423416666667	0.0495900696864112
A51	G10-R20	3.40423416666667	0.0556182926829268
A51	G10-R20	3.40423416666667	0.0492182926829268
A51	G10-R20	3.40423416666667	0.0565182926829268
A51	G14-R20	3.40423416666667	0.0520964285714286
A51	G14-R20	3.40423416666667	0.0495964285714286
A51	G14-R20	3.40423416666667	0.0489964285714286
A44	G20-R20	3.40423416666667	0.0527228222996516
A44	G20-R20	3.40423416666667	0.0531228222996516
A44	G20-R20	3.40423416666667	0.0540228222996516
A44	GØ-RØ	3.44083527777778	0.0856641986062718
A44	GØ-RØ	3.44083527777778	0.0656641986062718
L69	GØ-RØ	3.44083527777778	0.0563980836236934
L69	GØ-RØ	3.44083527777778	0.0591980836236934
L69	GØ-RØ	3.44083527777778	0.0597980836236934
A44	G14-R20	3.44083527777778	0.0592243902439025
A44	G14-R20	3.44083527777778	0.0569243902439024
A58	GØ-R20	3.44083527777778	0.0579065331010453
A58	GØ-R20	3.44083527777778	0.0620065331010453
A58	GØ-R20	3.44083527777778	0.0645065331010453
A51	GØ-R20	3.44083527777778	0.0472900696864112
A51	GØ-R20	3.44083527777778	0.0542900696864112
A51	GØ-R20	3.44083527777778	0.0508900696864111
A51	G10-R20	3.44083527777778	0.0571182926829268
A51	G10-R20	3.44083527777778	0.0506182926829268
A51	G10-R20	3.44083527777778	0.0550182926829268
A51	G14-R20	3.44083527777778	0.0531964285714286
A51	G14-R20	3.44083527777778	0.0503964285714286
A51	G14-R20	3.44083527777778	0.0497964285714286
A44	G20-R20	3.44083527777778	0.0538228222996516
A44	G20-R20	3.44083527777778	0.0544228222996516
A44	G20-R20	3.44083527777778	0.0555228222996516
A44	GØ-RØ	3.47744083333333	0.0875641986062718
A44	GØ-RØ	3.47744083333333	0.0669641986062718
L69	GØ-RØ	3.47744083333333	0.0572980836236934
L69	GØ-RØ	3.47744083333333	0.0604980836236934
L69	GØ-RØ	3.47744083333333	0.0608980836236934
A44	G14-R20	3.47744083333333	0.0607243902439024
A44	G14-R20	3.47744083333333	0.0578243902439024
A58	GØ-R20	3.47744083333333	0.0567065331010453
A58	GØ-R20	3.47744083333333	0.0632065331010453
A58	GØ-R20	3.47744083333333	0.0656065331010453
A51	GØ-R20	3.47744083333333	0.0465900696864111
A51	GØ-R20	3.47744083333333	0.0551900696864111
A51	GØ-R20	3.47744083333333	0.0518900696864111
A51	G10-R20	3.47744083333333	0.0579182926829268
A51	G10-R20	3.47744083333333	0.0511182926829268
A51	G10-R20	3.47744083333333	0.0560182926829268
A51	G14-R20	3.47744083333333	0.0538964285714286
A51	G14-R20	3.47744083333333	0.0511964285714286
A51	G14-R20	3.47744083333333	0.0508964285714286
A44	G20-R20	3.47744083333333	0.0548228222996516
A44	G20-R20	3.47744083333333	0.0552228222996516
A44	G20-R20	3.47744083333333	0.0563228222996516
A44	GØ-RØ	3.51404583333333	0.0892641986062718
A44	GØ-RØ	3.51404583333333	0.0684641986062718
L69	GØ-RØ	3.51404583333333	0.0584980836236934
L69	GØ-RØ	3.51404583333333	0.0618980836236934
L69	GØ-RØ	3.51404583333333	0.0621980836236934
A44	G14-R20	3.51404583333333	0.0618243902439024
A44	G14-R20	3.51404583333333	0.0589243902439024
A58	GØ-R20	3.51404583333333	0.0580065331010453
A58	GØ-R20	3.51404583333333	0.0649065331010453
A58	GØ-R20	3.51404583333333	0.0681065331010453
A51	GØ-R20	3.51404583333333	0.0486900696864111
A51	GØ-R20	3.51404583333333	0.0564900696864111
A51	GØ-R20	3.51404583333333	0.0531900696864111
A51	G10-R20	3.51404583333333	0.0593182926829268
A51	G10-R20	3.51404583333333	0.0525182926829268
A51	G10-R20	3.51404583333333	0.0572182926829268
A51	G14-R20	3.51404583333333	0.0552964285714286
A51	G14-R20	3.51404583333333	0.0523964285714286
A51	G14-R20	3.51404583333333	0.0516964285714286
A44	G20-R20	3.51404583333333	0.0560228222996516
A44	G20-R20	3.51404583333333	0.0564228222996516
A44	G20-R20	3.51404583333333	0.0577228222996516
A44	GØ-RØ	3.55064638888889	0.0913641986062718
A44	GØ-RØ	3.55064638888889	0.0698641986062718
L69	GØ-RØ	3.55064638888889	0.0597980836236934
L69	GØ-RØ	3.55064638888889	0.0632980836236934
L69	GØ-RØ	3.55064638888889	0.0634980836236934
A44	G14-R20	3.55064638888889	0.0631243902439024
A44	G14-R20	3.55064638888889	0.0601243902439024
A58	GØ-R20	3.55064638888889	0.0591065331010453
A58	GØ-R20	3.55064638888889	0.0658065331010453
A58	GØ-R20	3.55064638888889	0.0682065331010453
A51	GØ-R20	3.55064638888889	0.0498900696864111
A51	GØ-R20	3.55064638888889	0.0572900696864111
A51	GØ-R20	3.55064638888889	0.0537900696864112
A51	G10-R20	3.55064638888889	0.0602182926829268
A51	G10-R20	3.55064638888889	0.0534182926829268
A51	G10-R20	3.55064638888889	0.0583182926829268
A51	G14-R20	3.55064638888889	0.0556964285714286
A51	G14-R20	3.55064638888889	0.0528964285714286
A51	G14-R20	3.55064638888889	0.0528964285714286
A44	G20-R20	3.55064638888889	0.0570228222996516
A44	G20-R20	3.55064638888889	0.0577228222996516
A44	G20-R20	3.55064638888889	0.0592228222996516
A44	GØ-RØ	3.58725166666667	0.0930641986062718
A44	GØ-RØ	3.58725166666667	0.0711641986062718
L69	GØ-RØ	3.58725166666667	0.0608980836236934
L69	GØ-RØ	3.58725166666667	0.0643980836236934
L69	GØ-RØ	3.58725166666667	0.0646980836236934
A44	G14-R20	3.58725166666667	0.0645243902439025
A44	G14-R20	3.58725166666667	0.0613243902439024
A58	GØ-R20	3.58725166666667	0.0605065331010453
A58	GØ-R20	3.58725166666667	0.0674065331010453
A58	GØ-R20	3.58725166666667	0.0701065331010453
A51	GØ-R20	3.58725166666667	0.0488900696864111
A51	GØ-R20	3.58725166666667	0.0585900696864112
A51	GØ-R20	3.58725166666667	0.0549900696864111
A51	G10-R20	3.58725166666667	0.0614182926829268
A51	G10-R20	3.58725166666667	0.0543182926829268
A51	G10-R20	3.58725166666667	0.0589182926829268
A51	G14-R20	3.58725166666667	0.0565964285714286
A51	G14-R20	3.58725166666667	0.0544964285714286
A51	G14-R20	3.58725166666667	0.0542964285714286
A44	G20-R20	3.58725166666667	0.0582228222996516
A44	G20-R20	3.58725166666667	0.0586228222996516
A44	G20-R20	3.58725166666667	0.0601228222996516
A44	GØ-RØ	3.62386111111111	0.0952641986062718
A44	GØ-RØ	3.62386111111111	0.0728641986062718
L69	GØ-RØ	3.62386111111111	0.0618980836236934
L69	GØ-RØ	3.62386111111111	0.0661980836236934
L69	GØ-RØ	3.62386111111111	0.0662980836236934
A44	G14-R20	3.62386111111111	0.0662243902439024
A44	G14-R20	3.62386111111111	0.0626243902439024
A58	GØ-R20	3.62386111111111	0.0616065331010453
A58	GØ-R20	3.62386111111111	0.0688065331010453
A58	GØ-R20	3.62386111111111	0.0713065331010453
A51	GØ-R20	3.62386111111111	0.0499900696864111
A51	GØ-R20	3.62386111111111	0.0595900696864112
A51	GØ-R20	3.62386111111111	0.0559900696864111
A51	G10-R20	3.62386111111111	0.0553182926829268
A51	G10-R20	3.62386111111111	0.0628182926829268
A51	G10-R20	3.62386111111111	0.0604182926829268
A51	G14-R20	3.62386111111111	0.0582964285714286
A51	G14-R20	3.62386111111111	0.0552964285714286
A51	G14-R20	3.62386111111111	0.0551964285714286
A44	G20-R20	3.62386111111111	0.0593228222996516
A44	G20-R20	3.62386111111111	0.0599228222996516
A44	G20-R20	3.62386111111111	0.0615228222996516
A44	GØ-RØ	3.66046194444444	0.0970641986062718
A44	GØ-RØ	3.66046194444444	0.0742641986062718
L69	GØ-RØ	3.66046194444444	0.0632980836236934
L69	GØ-RØ	3.66046194444444	0.0667980836236934
L69	GØ-RØ	3.66046194444444	0.0674980836236934
A44	G14-R20	3.66046194444444	0.0674243902439024
A44	G14-R20	3.66046194444444	0.0638243902439024
A58	GØ-R20	3.66046194444444	0.0629065331010453
A58	GØ-R20	3.66046194444444	0.0701065331010453
A58	GØ-R20	3.66046194444444	0.0732065331010453
A51	GØ-R20	3.66046194444444	0.0510900696864112
A51	GØ-R20	3.66046194444444	0.0608900696864112
A51	GØ-R20	3.66046194444444	0.0572900696864111
A51	G10-R20	3.66046194444444	0.0566182926829268
A51	G10-R20	3.66046194444444	0.0635182926829268
A51	G10-R20	3.66046194444444	0.0613182926829268
A51	G14-R20	3.66046194444444	0.0588964285714286
A51	G14-R20	3.66046194444444	0.0560964285714286
A51	G14-R20	3.66046194444444	0.0558964285714286
A44	G20-R20	3.66046194444444	0.0603228222996516
A44	G20-R20	3.66046194444444	0.0608228222996516
A44	G20-R20	3.66046194444444	0.0623228222996516
A44	GØ-RØ	3.69706722222222	0.101164198606272
A44	GØ-RØ	3.69706722222222	0.0759641986062718
L69	GØ-RØ	3.69706722222222	0.0645980836236934
L69	GØ-RØ	3.69706722222222	0.0689980836236934
L69	GØ-RØ	3.69706722222222	0.0693980836236934
A44	G14-R20	3.69706722222222	0.0686243902439024
A44	G14-R20	3.69706722222222	0.0651243902439024
A58	GØ-R20	3.69706722222222	0.0646065331010453
A58	GØ-R20	3.69706722222222	0.0714065331010453
A58	GØ-R20	3.69706722222222	0.0742065331010453
A51	GØ-R20	3.69706722222222	0.0548900696864111
A51	GØ-R20	3.69706722222222	0.0621900696864112
A51	GØ-R20	3.69706722222222	0.0585900696864112
A51	G10-R20	3.69706722222222	0.0579182926829268
A51	G10-R20	3.69706722222222	0.0649182926829268
A51	G10-R20	3.69706722222222	0.0620182926829268
A51	G14-R20	3.69706722222222	0.0602964285714286
A51	G14-R20	3.69706722222222	0.0574964285714286
A51	G14-R20	3.69706722222222	0.0574964285714286
A44	G20-R20	3.69706722222222	0.0614228222996516
A44	G20-R20	3.69706722222222	0.0625228222996516
A44	G20-R20	3.69706722222222	0.0638228222996516
A44	GØ-RØ	3.7336725	0.101664198606272
A44	GØ-RØ	3.7336725	0.0777641986062718
L69	GØ-RØ	3.7336725	0.0657980836236934
L69	GØ-RØ	3.7336725	0.0700980836236934
L69	GØ-RØ	3.7336725	0.0704980836236934
A44	G14-R20	3.7336725	0.0702243902439024
A44	G14-R20	3.7336725	0.0663243902439025
A58	GØ-R20	3.7336725	0.0655065331010453
A58	GØ-R20	3.7336725	0.0730065331010453
A58	GØ-R20	3.7336725	0.0759065331010453
A51	GØ-R20	3.7336725	0.0530900696864112
A51	GØ-R20	3.7336725	0.0634900696864111
A51	GØ-R20	3.7336725	0.0591900696864111
A51	G10-R20	3.7336725	0.0588182926829268
A51	G10-R20	3.7336725	0.0661182926829268
A51	G10-R20	3.7336725	0.0637182926829268
A51	G14-R20	3.7336725	0.0617964285714286
A51	G14-R20	3.7336725	0.0589964285714286
A51	G14-R20	3.7336725	0.0586964285714286
A44	G20-R20	3.7336725	0.0628228222996516
A44	G20-R20	3.7336725	0.0637228222996516
A44	G20-R20	3.7336725	0.0654228222996516
A44	GØ-RØ	3.77027361111111	0.104664198606272
A44	GØ-RØ	3.77027361111111	0.0792641986062718
L69	GØ-RØ	3.77027361111111	0.0670980836236934
L69	GØ-RØ	3.77027361111111	0.0714980836236934
L69	GØ-RØ	3.77027361111111	0.0723980836236934
A44	G14-R20	3.77027361111111	0.0716243902439024
A44	G14-R20	3.77027361111111	0.0675243902439024
A58	GØ-R20	3.77027361111111	0.0670065331010453
A58	GØ-R20	3.77027361111111	0.0747065331010453
A58	GØ-R20	3.77027361111111	0.0780065331010453
A51	GØ-R20	3.77027361111111	0.0556900696864111
A51	GØ-R20	3.77027361111111	0.0649900696864111
A51	GØ-R20	3.77027361111111	0.0606900696864111
A51	G10-R20	3.77027361111111	0.0601182926829268
A51	G10-R20	3.77027361111111	0.0676182926829268
A51	G10-R20	3.77027361111111	0.0646182926829268
A51	G14-R20	3.77027361111111	0.0630964285714286
A51	G14-R20	3.77027361111111	0.0602964285714286
A51	G14-R20	3.77027361111111	0.0598964285714286
A44	G20-R20	3.77027361111111	0.0640228222996516
A44	G20-R20	3.77027361111111	0.0651228222996516
A44	G20-R20	3.77027361111111	0.0665228222996516
A44	GØ-RØ	3.80687833333333	0.109064198606272
A44	GØ-RØ	3.80687833333333	0.0808641986062718
L69	GØ-RØ	3.80687833333333	0.0682980836236934
L69	GØ-RØ	3.80687833333333	0.0730980836236934
L69	GØ-RØ	3.80687833333333	0.0735980836236934
A44	G14-R20	3.80687833333333	0.0733243902439024
A44	G14-R20	3.80687833333333	0.0689243902439024
A58	GØ-R20	3.80687833333333	0.0684065331010453
A58	GØ-R20	3.80687833333333	0.0759065331010453
A58	GØ-R20	3.80687833333333	0.0792065331010453
A51	GØ-R20	3.80687833333333	0.0570900696864112
A51	GØ-R20	3.80687833333333	0.0656900696864112
A51	GØ-R20	3.80687833333333	0.0613900696864112
A51	G10-R20	3.80687833333333	0.0606182926829268
A51	G10-R20	3.80687833333333	0.0686182926829268
A51	G10-R20	3.80687833333333	0.0656182926829268
A51	G14-R20	3.80687833333333	0.0636964285714286
A51	G14-R20	3.80687833333333	0.0605964285714286
A51	G14-R20	3.80687833333333	0.0607964285714286
A44	G20-R20	3.80687833333333	0.0650228222996516
A44	G20-R20	3.80687833333333	0.0662228222996516
A44	G20-R20	3.80687833333333	0.0679228222996516
A44	GØ-RØ	3.84348388888889	0.110964198606272
A44	GØ-RØ	3.84348388888889	0.0824641986062718
L69	GØ-RØ	3.84348388888889	0.0694980836236934
L69	GØ-RØ	3.84348388888889	0.0741980836236934
L69	GØ-RØ	3.84348388888889	0.0747980836236934
A44	G14-R20	3.84348388888889	0.0746243902439025
A44	G14-R20	3.84348388888889	0.0700243902439024
A58	GØ-R20	3.84348388888889	0.0698065331010453
A58	GØ-R20	3.84348388888889	0.0772065331010453
A58	GØ-R20	3.84348388888889	0.0809065331010453
A51	GØ-R20	3.84348388888889	0.0579900696864111
A51	GØ-R20	3.84348388888889	0.0673900696864111
A51	GØ-R20	3.84348388888889	0.0629900696864111
A51	G10-R20	3.84348388888889	0.0621182926829268
A51	G10-R20	3.84348388888889	0.0698182926829268
A51	G10-R20	3.84348388888889	0.0668182926829268
A51	G14-R20	3.84348388888889	0.0648964285714286
A51	G14-R20	3.84348388888889	0.0618964285714286
A51	G14-R20	3.84348388888889	0.0617964285714286
A44	G20-R20	3.84348388888889	0.0663228222996516
A44	G20-R20	3.84348388888889	0.0674228222996516
A44	G20-R20	3.84348388888889	0.0693228222996516
A44	GØ-RØ	3.88008888888889	0.112864198606272
A44	GØ-RØ	3.88008888888889	0.0842641986062718
L69	GØ-RØ	3.88008888888889	0.0709980836236934
L69	GØ-RØ	3.88008888888889	0.0756980836236934
L69	GØ-RØ	3.88008888888889	0.0763980836236934
A44	G14-R20	3.88008888888889	0.0764243902439024
A44	G14-R20	3.88008888888889	0.0715243902439024
A58	GØ-R20	3.88008888888889	0.0735065331010453
A58	GØ-R20	3.88008888888889	0.0792065331010453
A58	GØ-R20	3.88008888888889	0.0825065331010453
A51	GØ-R20	3.88008888888889	0.0573900696864112
A51	GØ-R20	3.88008888888889	0.0680900696864111
A51	GØ-R20	3.88008888888889	0.0639900696864111
A51	G10-R20	3.88008888888889	0.0633182926829268
A51	G10-R20	3.88008888888889	0.0712182926829268
A51	G10-R20	3.88008888888889	0.0686182926829268
A51	G14-R20	3.88008888888889	0.0664964285714286
A51	G14-R20	3.88008888888889	0.0630964285714286
A51	G14-R20	3.88008888888889	0.0630964285714286
A44	G20-R20	3.88008888888889	0.0674228222996516
A44	G20-R20	3.88008888888889	0.0690228222996516
A44	G20-R20	3.88008888888889	0.0707228222996516
A44	GØ-RØ	3.91668972222222	0.113464198606272
A44	GØ-RØ	3.91668972222222	0.0864641986062718
L69	GØ-RØ	3.91668972222222	0.0720980836236934
L69	GØ-RØ	3.91668972222222	0.0769980836236934
L69	GØ-RØ	3.91668972222222	0.0775980836236934
A44	G14-R20	3.91668972222222	0.0780243902439024
A44	G14-R20	3.91668972222222	0.0729243902439024
A58	GØ-R20	3.91668972222222	0.0727065331010453
A58	GØ-R20	3.91668972222222	0.0806065331010453
A58	GØ-R20	3.91668972222222	0.0845065331010453
A51	GØ-R20	3.91668972222222	0.0588900696864112
A51	GØ-R20	3.91668972222222	0.0701900696864112
A51	GØ-R20	3.91668972222222	0.0654900696864111
A51	G10-R20	3.91668972222222	0.0647182926829268
A51	G10-R20	3.91668972222222	0.0726182926829268
A51	G10-R20	3.91668972222222	0.0701182926829268
A51	G14-R20	3.91668972222222	0.0679964285714286
A51	G14-R20	3.91668972222222	0.0644964285714286
A51	G14-R20	3.91668972222222	0.0646964285714286
A44	G20-R20	3.91668972222222	0.0690228222996516
A44	G20-R20	3.91668972222222	0.0707228222996516
A44	G20-R20	3.91668972222222	0.0728228222996516
A44	GØ-RØ	3.95329527777778	0.116464198606272
A44	GØ-RØ	3.95329527777778	0.0880641986062718
L69	GØ-RØ	3.95329527777778	0.0734980836236934
L69	GØ-RØ	3.95329527777778	0.0786980836236934
L69	GØ-RØ	3.95329527777778	0.0794980836236934
A44	G14-R20	3.95329527777778	0.0795243902439024
A44	G14-R20	3.95329527777778	0.0744243902439024
A58	GØ-R20	3.95329527777778	0.0742065331010453
A58	GØ-R20	3.95329527777778	0.0821065331010453
A58	GØ-R20	3.95329527777778	0.0857065331010453
A51	GØ-R20	3.95329527777778	0.0599900696864111
A51	GØ-R20	3.95329527777778	0.0711900696864112
A51	GØ-R20	3.95329527777778	0.0666900696864112
A51	G10-R20	3.95329527777778	0.0657182926829268
A51	G10-R20	3.95329527777778	0.0739182926829268
A51	G10-R20	3.95329527777778	0.0710182926829268
A51	G14-R20	3.95329527777778	0.0701964285714286
A51	G14-R20	3.95329527777778	0.0655964285714286
A51	G14-R20	3.95329527777778	0.0657964285714286
A44	G20-R20	3.95329527777778	0.0699228222996516
A44	G20-R20	3.95329527777778	0.0719228222996516
A44	G20-R20	3.95329527777778	0.0746228222996516
A44	GØ-RØ	3.98990027777778	0.117564198606272
A44	GØ-RØ	3.98990027777778	0.0899641986062718
L69	GØ-RØ	3.98990027777778	0.0749980836236934
L69	GØ-RØ	3.98990027777778	0.0803980836236934
L69	GØ-RØ	3.98990027777778	0.0810980836236934
A44	G14-R20	3.98990027777778	0.0815243902439024
A44	G14-R20	3.98990027777778	0.0758243902439024
A58	GØ-R20	3.98990027777778	0.0757065331010453
A58	GØ-R20	3.98990027777778	0.0838065331010453
A58	GØ-R20	3.98990027777778	0.0877065331010453
A51	GØ-R20	3.98990027777778	0.0612900696864111
A51	GØ-R20	3.98990027777778	0.0724900696864112
A51	GØ-R20	3.98990027777778	0.0677900696864111
A51	G10-R20	3.98990027777778	0.0666182926829268
A51	G10-R20	3.98990027777778	0.0751182926829268
A51	G10-R20	3.98990027777778	0.0718182926829268
A51	G14-R20	3.98990027777778	0.0702964285714286
A51	G14-R20	3.98990027777778	0.0664964285714286
A51	G14-R20	3.98990027777778	0.0667964285714286
A44	G20-R20	3.98990027777778	0.0709228222996516
A44	G20-R20	3.98990027777778	0.0729228222996516
A44	G20-R20	3.98990027777778	0.0752228222996516
A44	GØ-RØ	4.02650555555556	0.123364198606272
A44	GØ-RØ	4.02650555555556	0.0917641986062718
L69	GØ-RØ	4.02650555555556	0.0765980836236934
L69	GØ-RØ	4.02650555555556	0.0819980836236934
L69	GØ-RØ	4.02650555555556	0.0825980836236934
A44	G14-R20	4.02650555555556	0.0826243902439024
A44	G14-R20	4.02650555555556	0.0771243902439025
A58	GØ-R20	4.02650555555556	0.0771065331010453
A58	GØ-R20	4.02650555555556	0.0851065331010453
A58	GØ-R20	4.02650555555556	0.0896065331010453
A51	GØ-R20	4.02650555555556	0.0741900696864111
A51	GØ-R20	4.02650555555556	0.0622900696864111
A51	GØ-R20	4.02650555555556	0.0694900696864112
A51	G10-R20	4.02650555555556	0.0681182926829268
A51	G10-R20	4.02650555555556	0.0770182926829268
A51	G10-R20	4.02650555555556	0.0758182926829268
A51	G14-R20	4.02650555555556	0.0717964285714286
A51	G14-R20	4.02650555555556	0.0679964285714286
A51	G14-R20	4.02650555555556	0.0681964285714286
A44	G20-R20	4.02650555555556	0.0726228222996516
A44	G20-R20	4.02650555555556	0.0748228222996516
A44	G20-R20	4.02650555555556	0.0771228222996516
A44	GØ-RØ	4.06311055555556	0.124164198606272
A44	GØ-RØ	4.06311055555556	0.0938641986062718
L69	GØ-RØ	4.06311055555556	0.0781980836236934
L69	GØ-RØ	4.06311055555556	0.0838980836236934
L69	GØ-RØ	4.06311055555556	0.0845980836236934
A44	G14-R20	4.06311055555556	0.0846243902439024
A44	G14-R20	4.06311055555556	0.0787243902439024
A58	GØ-R20	4.06311055555556	0.0877065331010453
A58	GØ-R20	4.06311055555556	0.0789065331010453
A58	GØ-R20	4.06311055555556	0.0917065331010453
A51	GØ-R20	4.06311055555556	0.0634900696864111
A51	GØ-R20	4.06311055555556	0.0754900696864112
A51	GØ-R20	4.06311055555556	0.0704900696864112
A51	G10-R20	4.06311055555556	0.0784182926829268
A51	G10-R20	4.06311055555556	0.0696182926829268
A51	G10-R20	4.06311055555556	0.0750182926829268
A51	G14-R20	4.06311055555556	0.0732964285714286
A51	G14-R20	4.06311055555556	0.0693964285714286
A51	G14-R20	4.06311055555556	0.0696964285714286
A44	G20-R20	4.06311055555556	0.0740228222996516
A44	G20-R20	4.06311055555556	0.0762228222996516
A44	G20-R20	4.06311055555556	0.0787228222996516
A44	GØ-RØ	4.09971138888889	0.127364198606272
A44	GØ-RØ	4.09971138888889	0.0959641986062718
L69	GØ-RØ	4.09971138888889	0.0795980836236934
L69	GØ-RØ	4.09971138888889	0.0858980836236934
L69	GØ-RØ	4.09971138888889	0.0869980836236934
A44	G14-R20	4.09971138888889	0.0862243902439025
A44	G14-R20	4.09971138888889	0.0803243902439024
A58	GØ-R20	4.09971138888889	0.0891065331010453
A58	GØ-R20	4.09971138888889	0.0805065331010453
A58	GØ-R20	4.09971138888889	0.0935065331010453
A51	GØ-R20	4.09971138888889	0.0667900696864111
A51	GØ-R20	4.09971138888889	0.0767900696864112
A51	GØ-R20	4.09971138888889	0.0719900696864112
A51	G10-R20	4.09971138888889	0.0795182926829268
A51	G10-R20	4.09971138888889	0.0711182926829268
A51	G10-R20	4.09971138888889	0.0761182926829268
A51	G14-R20	4.09971138888889	0.0742964285714286
A51	G14-R20	4.09971138888889	0.0704964285714286
A51	G14-R20	4.09971138888889	0.0708964285714286
A44	G20-R20	4.09971138888889	0.0751228222996516
A44	G20-R20	4.09971138888889	0.0776228222996516
A44	G20-R20	4.09971138888889	0.0801228222996516
A44	GØ-RØ	4.13631666666667	0.131764198606272
A44	GØ-RØ	4.13631666666667	0.0978641986062718
L69	GØ-RØ	4.13631666666667	0.0810980836236934
L69	GØ-RØ	4.13631666666667	0.0876980836236934
L69	GØ-RØ	4.13631666666667	0.0884980836236934
A44	G14-R20	4.13631666666667	0.0877243902439025
A44	G14-R20	4.13631666666667	0.0816243902439024
A58	GØ-R20	4.13631666666667	0.0909065331010453
A58	GØ-R20	4.13631666666667	0.0819065331010453
A58	GØ-R20	4.13631666666667	0.0955065331010453
A51	GØ-R20	4.13631666666667	0.0658900696864112
A51	GØ-R20	4.13631666666667	0.0783900696864111
A51	GØ-R20	4.13631666666667	0.0733900696864111
A51	G10-R20	4.13631666666667	0.0808182926829268
A51	G10-R20	4.13631666666667	0.0719182926829268
A51	G10-R20	4.13631666666667	0.0779182926829268
A51	G14-R20	4.13631666666667	0.0758964285714286
A51	G14-R20	4.13631666666667	0.0718964285714286
A51	G14-R20	4.13631666666667	0.0722964285714286
A44	G20-R20	4.13631666666667	0.0767228222996516
A44	G20-R20	4.13631666666667	0.0792228222996516
A44	G20-R20	4.13631666666667	0.0817228222996516
A44	GØ-RØ	4.17292194444444	0.132864198606272
A44	GØ-RØ	4.17292194444444	0.100064198606272
L69	GØ-RØ	4.17292194444444	0.0824980836236934
L69	GØ-RØ	4.17292194444444	0.0888980836236934
L69	GØ-RØ	4.17292194444444	0.0905980836236934
A44	G14-R20	4.17292194444444	0.0896243902439024
A44	G14-R20	4.17292194444444	0.0834243902439025
A58	GØ-R20	4.17292194444444	0.0929065331010453
A58	GØ-R20	4.17292194444444	0.0836065331010453
A58	GØ-R20	4.17292194444444	0.0976065331010453
A51	GØ-R20	4.17292194444444	0.0669900696864111
A51	GØ-R20	4.17292194444444	0.0800900696864111
A51	GØ-R20	4.17292194444444	0.0746900696864111
A51	G10-R20	4.17292194444444	0.0824182926829268
A51	G10-R20	4.17292194444444	0.0733182926829268
A51	G10-R20	4.17292194444444	0.0792182926829268
A51	G14-R20	4.17292194444444	0.0772964285714286
A51	G14-R20	4.17292194444444	0.0731964285714286
A51	G14-R20	4.17292194444444	0.0738964285714286
A44	G20-R20	4.17292194444444	0.0780228222996516
A44	G20-R20	4.17292194444444	0.0809228222996516
A44	G20-R20	4.17292194444444	0.0833228222996516
A44	GØ-RØ	4.20952277777778	0.133964198606272
A44	GØ-RØ	4.20952277777778	0.102164198606272
L69	GØ-RØ	4.20952277777778	0.0840980836236934
L69	GØ-RØ	4.20952277777778	0.0903980836236934
L69	GØ-RØ	4.20952277777778	0.0916980836236934
A44	G14-R20	4.20952277777778	0.0915243902439025
A44	G14-R20	4.20952277777778	0.0851243902439024
A58	GØ-R20	4.20952277777778	0.0944065331010453
A58	GØ-R20	4.20952277777778	0.0854065331010453
A58	GØ-R20	4.20952277777778	0.0995065331010453
A51	GØ-R20	4.20952277777778	0.0687900696864111
A51	GØ-R20	4.20952277777778	0.0819900696864111
A51	GØ-R20	4.20952277777778	0.0763900696864111
A51	G10-R20	4.20952277777778	0.0844182926829268
A51	G10-R20	4.20952277777778	0.0750182926829268
A51	G10-R20	4.20952277777778	0.0817182926829268
A51	G14-R20	4.20952277777778	0.0793964285714286
A51	G14-R20	4.20952277777778	0.0750964285714286
A51	G14-R20	4.20952277777778	0.0755964285714286
A44	G20-R20	4.20952277777778	0.0798228222996516
A44	G20-R20	4.20952277777778	0.0829228222996516
A44	G20-R20	4.20952277777778	0.0855228222996516
A44	GØ-RØ	4.2461325	0.135264198606272
A44	GØ-RØ	4.2461325	0.103964198606272
L69	GØ-RØ	4.2461325	0.0854980836236934
L69	GØ-RØ	4.2461325	0.0923980836236934
L69	GØ-RØ	4.2461325	0.0928980836236934
A44	G14-R20	4.2461325	0.0934243902439024
A44	G14-R20	4.2461325	0.0866243902439024
A58	GØ-R20	4.2461325	0.0966065331010453
A58	GØ-R20	4.2461325	0.0869065331010453
A58	GØ-R20	4.2461325	0.101806533101045
A51	GØ-R20	4.2461325	0.0703900696864111
A51	GØ-R20	4.2461325	0.0833900696864111
A51	GØ-R20	4.2461325	0.0775900696864111
A51	G10-R20	4.2461325	0.0856182926829268
A51	G10-R20	4.2461325	0.0761182926829268
A51	G10-R20	4.2461325	0.0856182926829268
A51	G14-R20	4.2461325	0.0812964285714286
A51	G14-R20	4.2461325	0.0769964285714286
A51	G14-R20	4.2461325	0.0776964285714286
A44	G20-R20	4.2461325	0.0815228222996516
A44	G20-R20	4.2461325	0.0843228222996516
A44	G20-R20	4.2461325	0.0874228222996516
A44	GØ-RØ	4.28273694444444	0.138564198606272
A44	GØ-RØ	4.28273694444444	0.106164198606272
L69	GØ-RØ	4.28273694444444	0.0871980836236934
L69	GØ-RØ	4.28273694444444	0.0936980836236934
L69	GØ-RØ	4.28273694444444	0.0950980836236934
A44	G14-R20	4.28273694444444	0.0954243902439024
A44	G14-R20	4.28273694444444	0.0884243902439024
A58	GØ-R20	4.28273694444444	0.0977065331010453
A58	GØ-R20	4.28273694444444	0.0884065331010453
A58	GØ-R20	4.28273694444444	0.103506533101045
A51	GØ-R20	4.28273694444444	0.0711900696864112
A51	GØ-R20	4.28273694444444	0.0849900696864111
A51	GØ-R20	4.28273694444444	0.0792900696864112
A51	G10-R20	4.28273694444444	0.0875182926829268
A51	G10-R20	4.28273694444444	0.0780182926829268
A51	G10-R20	4.28273694444444	0.0845182926829268
A51	G14-R20	4.28273694444444	0.0828964285714286
A51	G14-R20	4.28273694444444	0.0784964285714286
A51	G14-R20	4.28273694444444	0.0793964285714286
A44	G20-R20	4.28273694444444	0.0831228222996516
A44	G20-R20	4.28273694444444	0.0859228222996516
A44	G20-R20	4.28273694444444	0.0892228222996516
A44	GØ-RØ	4.31934222222222	0.141864198606272
A44	GØ-RØ	4.31934222222222	0.108864198606272
L69	GØ-RØ	4.31934222222222	0.0891980836236934
L69	GØ-RØ	4.31934222222222	0.0963980836236934
L69	GØ-RØ	4.31934222222222	0.0980980836236934
A44	G14-R20	4.31934222222222	0.0972243902439024
A44	G14-R20	4.31934222222222	0.0900243902439024
A58	GØ-R20	4.31934222222222	0.100306533101045
A58	GØ-R20	4.31934222222222	0.0905065331010453
A58	GØ-R20	4.31934222222222	0.106506533101045
A51	GØ-R20	4.31934222222222	0.0727900696864111
A51	GØ-R20	4.31934222222222	0.0867900696864111
A51	GØ-R20	4.31934222222222	0.0811900696864111
A51	G10-R20	4.31934222222222	0.0894182926829268
A51	G10-R20	4.31934222222222	0.0795182926829268
A51	G10-R20	4.31934222222222	0.0864182926829268
A51	G14-R20	4.31934222222222	0.0849964285714286
A51	G14-R20	4.31934222222222	0.0796964285714286
A51	G14-R20	4.31934222222222	0.0807964285714286
[truncated: 10,013 more rows]

## Sheet: Fig1C_PBP1a
Strain	Guide	Replicate	RFP fluorescence	Diameter (μm)	Length (μm)
AV63	R18	A	1111.07	0.969505	3.24721
AV63	R18	A	955.951	0.913495	2.44627
AV63	R18	A	1138.6	0.863415	5.21521
AV63	R18	A	1201.17	0.833433	3.0719
AV63	R18	A	4144.89	1.0638	1.95124
AV63	R18	A	1253.79	0.836662	3.26807
AV63	R18	A	1103.97	0.819661	3.61556
AV63	R18	A	1651.81	0.89142	3.44526
AV63	R18	A	874.901	0.880482	4.60935
AV63	R18	A	0	0.865326	2.59343
AV63	R18	A	0	0.892475	2.54098
AV63	R18	A	1479.27	0.944663	3.39567
AV63	R18	A	2775.48	0.961598	3.92327
AV63	R18	A	0	0.78052	3.51689
AV63	R18	A	1284.27	0.795215	4.84185
AV63	R18	A	0	0.698613	3.70903
AV63	R18	A	1323.79	0.822956	3.82727
AV63	R18	A	1392.86	0.939062	3.91001
AV63	R18	A	1073.68	0.914549	5.01865
AV63	R18	A	1259.31	0.71054	5.20702
AV63	R18	A	1324.27	0.986902	5.54054
AV63	R18	A	829.233	0.985452	5.35717
AV63	R18	A	2233.05	0.962059	4.08499
AV63	R18	A	1501.53	0.967858	6.05208
AV63	R18	A	1173.23	1.02914	4.51614
AV63	R18	A	1039.47	1.00621	4.92115
AV63	R18	A	811.27	1.03026	3.40399
AV63	R18	A	2228.27	1.01886	2.10821
AV63	R18	A	837.775	1.05859	3.90013
AV63	R18	A	1089.77	0.994018	4.9931
AV63	R18	A	2427.38	0.966474	3.79113
AV63	R18	A	1439.66	1.03962	3.78709
AV63	R18	A	1347.14	0.99013	3.94634
AV63	R18	A	1020.75	1.01477	4.05776
AV63	R18	A	1784	0.984529	3.91826
AV63	R18	A	1226.26	0.987363	4.06809
AV63	R18	A	2114.76	0.951055	4.89801
AV63	R18	A	1070.92	1.02031	4.72999
AV63	R18	A	1611.84	1.02268	4.641
AV63	R18	A	1488.04	0.960544	4.64588
AV63	R18	A	1290.83	0.993755	4.27999
AV63	R18	A	1357.58	0.98677	5.57648
AV63	R18	A	1829.97	0.943279	4.06614
AV63	R18	A	2481.73	1.03804	3.13144
AV63	R18	A	1815.5	1.03164	4.09331
AV63	R18	A	1225.78	0.973064	5.09126
AV63	R18	A	869.651	1.02077	3.12032
AV63	R18	A	1160.21	0.981959	7.47955
AV63	R18	A	1366.34	0.939062	3.70052
AV63	R18	A	1320.27	0.969769	3.50766
AV63	R18	A	1706.88	0.916856	4.24833
AV63	R18	A	1573.89	1.02117	3.79912
AV63	R18	A	1310.98	1.02275	4.3706
AV63	R18	A	2765.94	1.05082	1.80459
AV63	R18	A	1144.08	0.974777	5.21469
AV63	R18	A	1619.06	0.929903	4.21512
AV63	R18	A	1236.5	0.916131	3.44409
AV63	R18	A	1827.45	0.893727	3.51605
AV63	R18	A	1546.05	1.01392	3.48055
AV63	R18	A	1425.63	1.03178	3.64981
AV63	R18	A	2306.37	0.919228	1.65509
AV63	R18	A	983.118	1.04502	3.36609
AV63	R18	A	1474.97	1.04752	4.07765
AV63	R18	A	1911.91	1.03962	1.59438
AV63	R18	A	1332.52	0.998565	4.03442
AV63	R18	A	1417.39	1.02664	2.86546
AV63	R18	A	1374.95	0.93412	4.75423
AV63	R18	A	1276.72	1.01471	2.93605
AV63	R18	A	1481.57	0.978928	3.30778
AV63	R18	A	1201.72	0.999751	3.7141
AV63	R18	A	1451.38	1.00193	1.88383
AV63	R18	A	1206.71	0.942159	3.1774
AV63	R18	A	0	0.915736	3.33431
AV63	R18	A	0	0.905324	5.38675
AV63	R18	A	1795.77	0.924763	4.71705
AV63	R18	A	914.907	0.922852	5.05102
AV63	R18	A	1225.6	1.05708	3.33262
AV63	R18	A	1157.65	0.965156	4.81221
AV63	R18	A	1478.34	0.97682	3.17213
AV63	R18	A	1452.32	1.01767	3.80205
AV63	R18	A	1839.67	0.956524	2.13571
AV63	R18	A	1121.84	0.965881	5.37732
AV63	R18	A	1412.91	0.942686	3.89844
AV63	R18	A	1245.18	0.981432	5.3443
AV63	R18	A	1162.53	1.06248	3.60529
AV63	R18	A	1295.9	1.08647	4.62228
AV63	R18	A	872.149	0.98677	4.73362
AV63	R18	A	1312.69	0.985057	1.65731
AV63	R18	A	904.562	0.946574	5.07676
AV63	R18	A	918.551	0.969571	5.00617
AV63	R18	A	1976.22	1.28824	1.54602
AV63	R18	A	1141.72	0.936954	5.03698
AV63	R18	A	1252.49	0.900646	7.6492
AV63	R18	A	866.147	0.892804	3.82336
AV63	R18	A	1540.3	0.983936	4.42442
AV63	R18	A	1239.75	0.995007	4.84373
AV63	R18	A	1130.29	0.965815	4.58133
AV63	R18	A	1579.2	1.10044	4.72297
AV63	R18	A	1930.93	0.995468	3.66392
AV63	R18	A	1210.49	0.964695	5.03718
AV63	R18	A	1115.91	1.00608	3.58566
AV63	R18	A	1756.52	0.973789	4.03702
AV63	R18	A	0	0.946574	4.87695
AV63	R18	A	997.185	0.963575	4.74754
AV63	R18	A	0	0.959753	3.92834
AV63	R18	A	954.753	0.941237	3.37038
AV63	R18	A	1211.27	1.15414	2.56834
AV63	R18	A	1367.88	0.966079	4.65205
AV63	R18	A	1280.99	0.933066	4.89112
AV63	R18	A	1257.64	1.06077	3.50694
AV63	R18	A	1488.44	1.00469	4.86889
AV63	R18	A	1415.67	0.913363	7.0746
AV63	R18	A	2319.92	1.00792	3.90117
AV63	R18	A	794.467	1.03112	4.11158
AV63	R18	A	1263.73	0.936295	3.9258
AV63	R18	A	1449.06	1.16646	3.45176
AV63	R18	A	1549.43	1.19223	3.53795
AV63	R18	A	2199.19	0.952307	4.0469
AV63	R18	A	1987.41	1.05029	1.69104
AV63	R18	A	1326.27	0.957117	3.69798
AV63	R18	A	1350.03	1.03402	5.1441
AV63	R18	A	1690.54	1.29437	2.9627
AV63	R18	A	1203.87	0.996918	3.85411
AV63	R18	A	1087.42	0.998894	4.19588
AV63	R18	A	1641.59	1.01926	3.06592
AV63	R18	A	1753.75	0.910596	5.6251
AV63	R18	A	3124.58	1.07448	1.79731
AV63	R18	A	1104	0.942818	6.19639
AV63	R18	A	1459.98	1.02993	5.53052
AV63	R18	A	1085.16	1.05471	3.68648
AV63	R18	A	1329.6	0.934252	5.89154
AV63	R18	A	1630.67	0.929837	4.90496
AV63	R18	A	1425.56	0.986177	4.10462
AV63	R18	A	1141.33	0.997247	3.24064
AV63	R18	A	2001.57	0.979785	2.92409
AV63	R18	A	1809.67	0.977808	4.32243
AV63	R18	A	1371.73	0.911782	3.71293
AV63	R18	A	1755.71	0.930628	1.75448
AV63	R18	A	1174.41	0.802133	2.45927
AV63	R18	A	1107.21	0.960083	5.99566
AV63	R18	A	1641.68	0.98644	5.49972
AV63	R18	A	1215.23	1.00759	5.68087
AV63	R18	A	1175.36	0.856496	2.98064
AV63	R18	A	1510.45	0.975502	4.40719
AV63	R18	A	1216.42	1.03738	2.43815
AV63	R18	A	1473.03	1.04528	4.80434
AV63	R18	A	950.622	0.911452	6.916
AV63	R18	A	1085.2	0.956327	4.94137
AV63	R18	A	1402.72	0.967792	5.84857
AV63	R18	A	1712.68	1.13477	3.13391
AV63	R18	A	1749.56	0.977479	4.93694
AV63	R18	A	1182.96	1.00878	3.97345
AV63	R18	A	780.241	0.913429	3.62095
AV63	R18	A	2658.02	0.94295	1.73687
AV63	R18	A	1759.88	0.942752	3.64487
AV63	R18	A	984.407	1.05056	2.3218
AV63	R18	A	1705.21	0.997972	3.39287
AV63	R18	A	1253.35	1.1915	4.01856
AV63	R18	A	1194.86	0.971087	2.89003
AV63	R18	A	1394.26	0.944202	3.10479
AV63	R18	A	1412.64	0.972734	5.34255
AV63	R18	A	887.942	0.977149	4.238
AV63	R18	A	1364.68	1.01352	3.53782
AV63	R18	A	1029.26	0.946772	5.38258
AV63	R18	A	1298.18	0.97537	5.49016
AV63	R18	A	2314.68	0.957381	5.45935
AV63	R18	A	1323.26	0.946574	4.08135
AV63	R18	A	1081.68	0.907828	5.23855
AV63	R18	A	1438.72	1.00107	4.10715
AV63	R18	A	1400.56	0.943279	5.14956
AV63	R18	A	1689.83	0.959621	3.97735
AV63	R18	A	2808.22	0.952373	1.76748
AV63	R18	A	1170.09	1.06393	3.80712
AV63	R18	A	1520.86	0.989471	3.93302
AV63	R18	A	1265.52	1.03481	2.4871
AV63	R18	A	1678.38	1.04463	3.05468
AV63	R18	A	1397.39	0.997642	4.90204
AV63	R18	A	1627.45	1.00944	3.07099
AV63	R18	A	2701.43	0.956195	1.71496
AV63	R18	A	908.304	1.02038	3.35654
AV63	R18	A	1843.71	0.979653	6.45528
AV63	R18	A	839.561	0.987495	5.62153
AV63	R18	A	1267.28	0.902688	2.20071
AV63	R18	A	1632.35	1.03197	4.0012
AV63	R18	A	730.471	0.997642	5.4585
AV63	R18	A	2061.09	1.06617	2.81736
AV63	R18	A	2661.55	1.01115	1.72517
AV63	R18	A	3013.58	1.07988	2.90583
AV63	R18	A	991.822	1.00983	3.62134
AV63	R18	A	1317.28	0.974184	3.39501
AV63	R18	A	1324.95	1.411	4.47993
AV63	R18	A	1541.54	0.979192	2.3437
AV63	R18	A	1036.69	0.957051	2.8925
AV63	R18	A	1235.38	1.04133	3.4101
AV63	R18	A	1089.77	1.11085	4.26926
AV63	R18	A	1748.63	0.990987	3.93978
AV63	R18	A	714.153	0.938733	4.42052
AV63	R18	A	1213.28	0.948946	4.18893
AV63	R18	A	1029.87	0.984529	3.17486
AV63	R18	A	1525.72	0.953559	5.26604
AV63	R18	A	3979.24	1.05774	2.00948
AV63	R18	A	0	0.866842	3.12702
AV63	R18	A	1228.74	0.974579	4.36696
AV63	R18	A	1850.65	0.929837	3.43967
AV63	R18	A	2142.29	0.930562	6.37065
AV63	R18	A	907.537	0.964366	5.22119
AV63	R18	A	1160.19	0.919096	4.45036
AV63	R18	A	1117.96	1.00878	5.87632
AV63	R18	A	1418.78	0.914286	2.96121
AV63	R18	A	1773.98	0.930496	4.37326
AV63	R18	A	1196.57	0.861109	5.04134
AV63	R18	A	1626.09	0.966804	5.74535
AV63	R18	A	1049.25	0.857221	4.49299
AV63	R18	A	1042.37	0.929705	4.89125
AV63	R18	A	1567.64	1.04021	3.09875
AV63	R18	A	1135.88	0.99415	4.06724
AV63	R18	A	2434.84	0.964366	1.96261
AV63	R18	A	2250.26	0.916329	2.82613
AV63	R18	A	752.686	0.987165	6.27621
AV63	R18	A	823.654	0.930101	4.1364
AV63	R18	A	1350.21	1.0951	4.28233
AV63	R18	A	1353.35	1.0012	4.63898
AV63	R18	A	2070.61	0.953493	1.90463
AV63	R18	A	2723.08	0.99303	1.86648
AV63	R18	A	2491.98	1.04416	1.5223
AV63	R18	A	1195.55	0.999949	4.87
AV63	R18	A	1370.47	1.05668	3.56076
AV63	R18	A	1075.16	1.00713	3.99984
AV63	R18	A	1024.14	0.983211	4.56618
AV63	R18	A	1915.59	0.956985	4.67571
AV63	R18	A	1124.51	0.929573	4.91458
AV63	R18	A	3656.64	1.07421	2.23048
AV63	R18	A	817.732	1.07467	3.95479
AV63	R18	A	2560.78	0.916394	3.17109
AV63	R18	A	1837.89	0.91824	5.41821
AV63	R18	A	1293.3	1.03408	6.26567
AV63	R18	A	1474.09	1.05075	4.45536
AV63	R18	A	1808.91	0.959753	3.72346
AV63	R18	A	1124.62	0.947035	3.04434
AV63	R18	A	1360.89	0.974118	5.04296
AV63	R18	A	1535.06	1.04456	2.47663
AV63	R18	A	1180.86	1.0039	4.22266
AV63	R18	A	1701.87	1.03052	3.48602
AV63	R18	A	0	0.954481	5.61782
AV63	R18	A	1820.96	1.05233	1.51924
AV63	R18	A	2253.48	0.901568	2.63101
AV63	R18	A	1437.04	0.948024	3.28556
AV63	R18	A	797.504	1.04601	4.03669
AV63	R18	A	821.818	1.00964	5.5159
AV63	R18	A	990.108	0.942686	5.68093
AV63	R18	A	1420.4	1.03355	3.26852
AV63	R18	A	2036.63	0.915736	2.72409
AV63	R11	A	1502.13	1.06097	3.9962
AV63	R11	A	4974.2	0.895901	2.56295
AV63	R11	A	6043.19	0.924697	2.66968
AV63	R11	A	3280.65	1.0267	5.16197
AV63	R11	A	3864.25	1.00298	3.28322
AV63	R11	A	4949.1	0.94552	3.96949
AV63	R11	A	6821.52	0.933922	5.0091
AV63	R11	A	2369.43	0.993162	4.65777
AV63	R11	A	3610.22	0.937217	2.938
AV63	R11	A	4320.22	0.947299	4.41181
AV63	R11	A	3242.35	0.996324	5.10497
AV63	R11	A	5551.77	1.01794	3.42251
AV63	R11	A	2920.86	1.00562	4.01791
AV63	R11	A	2669.48	0.96799	4.59661
AV63	R11	A	4254.17	0.943148	5.09047
AV63	R11	A	2705.43	0.955009	4.07986
AV63	R11	A	3682.53	0.974382	3.03485
AV63	R11	A	5100	1.0151	3.61491
AV63	R11	A	4181.59	0.975765	3.83929
AV63	R11	A	3200.18	1.08041	3.06404
AV63	R11	A	3840.08	1.05682	3.64364
AV63	R11	A	2562.09	0.996193	4.64802
AV63	R11	A	3739.95	1.11559	4.47285
AV63	R11	A	3788.64	0.933791	4.91621
AV63	R11	A	3351.58	1.00489	4.38978
AV63	R11	A	2478.12	1.04061	3.78027
AV63	R11	A	5676.55	1.01616	4.08291
AV63	R11	A	4321.4	0.975172	3.30778
AV63	R11	A	3026.73	0.981696	3.68011
AV63	R11	A	3719.68	1.05444	4.53993
AV63	R11	A	2632.7	1.03006	3.84702
AV63	R11	A	3649.91	1.16778	3.1618
AV63	R11	A	3542.52	1.0271	6.16584
AV63	R11	A	2654.85	0.997181	4.57515
AV63	R11	A	5548.72	1.05998	2.38478
AV63	R11	A	3338.88	0.990987	4.06555
AV63	R11	A	5100.28	0.916592	2.78778
AV63	R11	A	4598.97	0.970362	2.8026
AV63	R11	A	4122.41	0.958501	2.28612
AV63	R11	A	2332.55	1.04179	3.86048
AV63	R11	A	3724.21	1.03474	4.81169
AV63	R11	A	3234.55	0.952636	3.53086
AV63	R11	A	3868.07	0.968122	2.09059
AV63	R11	A	1910.87	1.17885	3.02815
AV63	R11	A	3186.72	1.03125	4.50177
AV63	R11	A	4271.82	1.00832	4.52491
AV63	R11	A	3277.63	0.960148	4.83659
AV63	R11	A	4066.62	0.987956	2.80046
AV63	R11	A	3701.7	0.972668	3.19085
AV63	R11	A	5510.92	0.978138	4.26042
AV63	R11	A	3560.05	1.06775	3.72729
AV63	R11	A	0	0.916526	5.41092
AV63	R11	A	0	1.26458	3.26215
AV63	R11	A	5310.77	0.990592	5.06961
AV63	R11	A	3962.39	0.976886	4.59576
AV63	R11	A	3387.75	1.05036	3.77403
AV63	R11	A	4406.65	0.934054	3.96669
AV63	R11	A	3367.32	0.988351	3.5906
AV63	R11	A	4551.51	1.01767	5.84415
AV63	R11	A	3139.59	0.994216	5.30881
AV63	R11	A	2694.69	1.00674	3.8103
AV63	R11	A	4001.22	1.17879	3.31188
AV63	R11	A	4703.6	0.98275	2.48723
AV63	R11	A	6197.32	0.970757	4.22812
AV63	R11	A	3927.45	1.01128	3.47399
AV63	R11	A	2596.53	1.01741	5.06097
AV63	R11	A	4777.54	1.01102	4.61812
AV63	R11	A	0	0.785528	3.63422
AV63	R11	A	2552.64	1.0128	3.55355
AV63	R11	A	3006.1	0.989735	5.0505
AV63	R11	A	3676.61	0.987561	4.97985
AV63	R11	A	3169.6	0.972668	4.29397
AV63	R11	A	4183.56	1.07046	2.90752
AV63	R11	A	3591.32	1.03916	4.01024
AV63	R11	A	3307.75	1.06624	3.9301
AV63	R11	A	6355.6	0.940248	2.98902
AV63	R11	A	3857.9	0.990592	4.61416
AV63	R11	A	3663.7	0.980049	3.5984
AV63	R11	A	5133.21	1.02374	3.05897
AV63	R11	A	4261.94	0.980642	4.54162
AV63	R11	A	2953.37	0.971416	3.56499
AV63	R11	A	2899.49	1.07929	3.85723
AV63	R11	A	4911.74	1.0356	4.76749
AV63	R11	A	2303.83	1.01181	4.06393
AV63	R11	A	2228.63	1.06927	4.87383
AV63	R11	A	4693.46	1.03975	2.49158
AV63	R11	A	3349.64	0.992305	4.0131
AV63	R11	A	2912.51	1.10314	3.43492
AV63	R11	A	2894.98	1.04094	4.64757
AV63	R11	A	4489.62	1.00067	3.69349
AV63	R11	A	5192.86	0.964102	7.3021
AV63	R11	A	2644.87	0.989867	4.66979
AV63	R11	A	3307.66	1.05866	3.5542
AV63	R11	A	4336.96	0.984529	4.95514
AV63	R11	A	0	1.00786	2.76139
AV63	R11	A	0	0.934054	2.67033
AV63	R11	A	2950.74	1.03823	4.35097
AV63	R11	A	2547.05	1.01636	4.47506
AV63	R11	A	3880.46	0.953954	3.78944
AV63	R11	A	2545.04	1.00357	3.61595
AV63	R11	A	3720.7	1.06894	3.01041
AV63	R11	A	5979.72	0.993689	3.75947
AV63	R11	A	6430.84	0.90025	3.37577
AV63	R11	A	2947.29	0.991119	4.09727
AV63	R11	A	4013.06	0.895176	5.49926
AV63	R11	A	4333.51	0.995797	3.34893
AV63	R11	A	2419.33	1.0414	5.55614
AV63	R11	A	5264.77	0.873234	3.51201
AV63	R11	A	4847.24	0.975238	4.45334
AV63	R11	A	3871.28	0.994479	5.01891
AV63	R11	A	6871.13	0.9842	2.53051
AV63	R11	A	3513.91	0.983673	2.66383
AV63	R11	A	4245.42	0.990526	5.22021
AV63	R11	A	3067.95	0.99158	6.21927
AV63	R11	A	4003.26	0.984925	4.05912
AV63	R11	A	3267.85	0.967529	4.01102
AV63	R11	A	4178.18	1.21813	2.504
AV63	R11	A	6076.44	0.973986	4.07251
AV63	R11	A	4957.16	0.970692	5.79547
AV63	R11	A	4229.82	1.00278	4.81286
AV63	R11	A	0	0.932143	3.78963
AV63	R11	A	5625.21	0.990658	3.54672
AV63	R11	A	4707.07	0.968912	2.84492
AV63	R11	A	0	0.892079	3.29817
AV63	R11	A	4381.81	1.01682	3.63694
AV63	R11	A	3086.94	0.972207	3.37019
AV63	R11	A	5700	0.919294	3.07665
AV63	R11	A	4022.31	1.00193	7.228
AV63	R11	A	4626.04	1.09879	3.63857
AV63	R11	A	2567.11	1.03573	5.15502
AV63	R11	A	4334.67	0.982421	5.32181
AV63	R11	A	4500.82	0.917515	5.71591
AV63	R11	A	4061.21	0.940644	2.83231
AV63	R11	A	2773.04	1.00819	4.12054
AV63	R11	A	3568.43	1.01642	3.90273
AV63	R11	A	3102.15	1.05827	5.12115
AV63	R11	A	4883.85	1.00074	3.12852
AV63	R11	A	3310.37	0.963114	4.89138
AV63	R11	A	3018.9	1.0696	3.01223
AV63	R11	A	3197.99	1.12231	3.91099
AV63	R11	A	5207.55	0.988351	5.05992
AV63	R11	A	4176.57	0.901832	4.95073
AV63	R11	A	4499.64	1.09372	3.17661
AV63	R11	A	5690.9	0.971021	5.65409
AV63	R11	A	4944.94	1.0271	2.70543
AV63	R11	A	5560.45	0.984068	3.41322
AV63	R11	A	2959.33	0.995929	5.23257
AV63	R11	A	5620.46	0.904929	5.14722
AV63	R11	A	3448.84	0.989735	4.84861
AV63	R11	A	5910.76	0.970098	5.89069
AV63	R11	A	5199.58	0.900448	4.23592
AV63	R11	A	2826.67	1.07362	5.24686
AV63	R11	A	1660.33	1.08943	3.5152
AV63	R11	A	3160.62	1.10505	2.36463
AV63	R11	A	5871.26	0.947299	5.01898
AV63	R11	A	3960.38	1.04113	3.67932
AV63	R11	A	3365.07	1.018	3.49115
AV63	R11	A	4482.27	1.04818	3.11077
AV63	R11	A	3446.03	0.9842	5.01839
AV63	R11	A	3087.48	1.02809	3.76565
AV63	R11	A	4066.76	1.00884	2.99566
AV63	R11	A	7876.08	0.995138	2.27578
AV63	R11	A	3707.45	1.08344	4.42416
AV63	R11	A	2544.23	1.1459	3.58163
AV63	R11	A	6213.98	1.04423	3.51631
AV63	R11	A	2769.28	1.0578	3.69856
AV63	R11	A	3435.71	0.995666	3.99016
AV63	R11	A	6210.02	0.885688	2.97096
AV63	R11	A	2911.08	0.953625	3.94765
AV63	R11	A	0	0.916658	6.23356
AV63	R11	A	5302.24	0.99817	5.31518
AV63	R11	A	2786.08	1.08337	5.68107
AV63	R11	A	4132.85	1.02446	5.29575
AV63	R11	A	3503.23	1.02466	3.82505
AV63	R11	A	3594.24	0.992964	4.26185
AV63	R11	A	3882.53	1.01879	4.81923
AV63	R11	A	4651.17	1.02005	4.82677
AV63	R11	A	4225.92	1.00562	3.60445
AV63	R11	A	5050	0.886874	3.81875
AV63	R11	A	6292.92	0.933527	4.85504
AV63	R11	A	4144.82	1.05161	2.65336
AV63	R11	A	2706.76	0.908224	4.50547
AV63	R11	A	2397.7	1.02169	4.90262
AV63	R11	A	2686.49	1.03738	4.69235
AV63	R11	A	2303.18	1.01076	3.19403
AV63	R11	A	3942.25	0.982091	2.30932
AV63	R11	A	4778.98	0.982487	5.34826
AV63	R11	A	2252.78	1.01214	4.74071
AV63	R11	A	4643.14	1.018	3.00963
AV63	R11	A	3059.9	0.997906	5.04439
AV63	R11	A	3944.44	1.02005	4.88572
AV63	R11	A	3713.78	1.00759	4.91634
AV63	R11	A	5213.57	0.97649	6.3126
AV63	R11	A	3771.02	0.996918	4.62748
AV63	R11	A	4468.79	0.909278	4.56378
AV63	R11	A	6629.25	0.932077	4.19205
AV63	R11	A	5104.96	1.00601	4.25925
AV63	R11	A	3945	0.975897	5.01508
AV63	R11	A	3618.43	1.03355	4.06738
AV63	R11	A	3151.45	0.950594	4.25913
AV63	R11	A	3431.08	1.01464	3.73113
AV63	R11	A	4665.44	0.9017	6.5429
AV63	R11	A	3662.84	1.25766	3.65768
AV63	R11	A	2542.97	0.988944	6.03941
AV63	R11	A	5847.06	0.992898	2.66416
AV63	R11	A	4597.47	1.10854	3.31435
AV63	R11	A	3783.47	0.977215	5.01553
AV63	R11	A	5423.9	0.962521	3.37954
AV63	R11	A	4259.88	1.02024	4.52771
AV63	R11	A	2246.62	0.991712	4.8635
AV63	R11	A	3319.93	0.996654	3.60808
AV63	R11	A	2886.76	1.06018	3.88915
AV63	R11	A	3245.48	1.00739	3.24129
AV63	R11	A	3535.94	1.01952	4.12132
AV63	R11	A	2054.59	1.01853	3.64384
AV63	R11	A	3953.25	1.07415	3.49577
AV63	R11	A	6024.34	0.956458	4.20101
AV63	R11	A	3974.26	0.996324	3.13944
AV63	R11	A	2746.62	0.954481	5.22372
AV63	R11	A	4185.46	0.952439	5.53456
AV63	R11	A	4324.03	0.955997	6.6092
AV63	R11	A	4521.58	1.04522	3.64929
AV63	R11	A	5016.44	0.981235	2.83615
AV63	R11	A	6040.11	0.979126	4.32413
AV63	R11	A	5506.47	0.944268	4.87662
AV63	R11	A	5392.7	0.905522	2.60975
AV63	R11	A	3941.06	1.07032	3.33053
AV63	R11	A	2866.02	1.0727	5.07618
AV63	R11	A	2390.61	0.992898	3.00449
AV63	R11	A	4275.73	1.16389	2.27325
AV63	R11	A	6743.27	0.943741	2.67767
AV63	R11	A	3258.86	0.97135	4.47031
AV63	R11	A	3840.78	0.977017	3.01561
AV63	R11	A	3669.36	0.968319	3.75225
AV63	R11	A	4085.98	0.893068	6.03304
AV63	R11	A	4817.82	0.896758	5.45441
AV63	R11	A	4516.06	0.987495	3.44077
AV63	R11	A	5495.83	0.9614	4.60206
AV63	R11	A	3252.24	0.945322	4.78634
AV63	R11	A	2736.95	1.00581	4.02109
AV63	R11	A	4284.98	0.897483	3.6855
AV63	R11	A	3725.84	1.00832	3.42218
AV63	R11	A	2673.65	1.06835	3.4474
AV63	R11	A	3320.88	1.00641	4.3899
AV63	R11	A	3152.5	1.03441	4.12529
AV63	R11	A	5486.44	1.02321	3.00385
AV63	R11	A	3546.64	1.02578	4.2523
AV63	R11	A	4961.02	0.9415	4.5266
AV63	R11	A	3708.52	0.981235	3.12683
AV63	R11	A	4188.03	1.07171	3.27854
AV63	R11	A	2361.61	0.996456	4.17365
AV63	R11	A	5539.45	0.988878	4.44795
AV63	R11	A	3552.73	1.00357	5.44453
AV63	R11	A	2452.44	1.0043	3.66067
AV63	R11	A	2412.74	1.03784	3.59547
AV63	R11	A	4775.93	1.00667	3.68251
AV63	R11	A	3128.02	1.11309	4.02552
AV63	R11	A	3873	0.98051	4.14616
AV63	R11	A	7895.1	1.03962	2.04893
AV63	R11	A	5113.85	1.03507	4.06919
AV63	R11	A	4207.5	1.06512	4.44139
AV63	R11	A	5946.72	0.950857	6.10201
AV63	R11	A	5509.35	0.954218	3.76031
AV63	R11	A	4091.79	0.945454	6.19255
AV63	R11	A	4606.36	0.87152	5.78695
AV63	R11	A	1282.51	1.07744	4.56956
AV63	R11	A	3702.64	1.02512	5.28287
AV63	R11	A	2112.87	0.996127	2.92526
AV63	R11	A	5519.78	0.977017	3.4775
AV63	R11	A	4841.42	1.02881	4.43664
AV63	R11	A	4080.7	1.07645	5.58057
AV63	R11	A	5088.95	0.937019	4.36104
AV63	R11	A	0	0.978797	4.27954
AV63	R11	A	0	0.764112	3.82967
AV63	R11	A	7686.53	0.969308	3.32735
AV63	R11	A	2619.39	0.989537	4.69469
AV63	R11	A	4514.85	0.995138	5.21124
AV63	R11	A	2459.84	0.984595	3.48472
AV63	R11	A	2911.64	1.06927	3.65014
AV63	R11	A	3360.64	1.01866	4.71282
AV63	R11	A	3874.65	0.993623	3.11123
AV63	R11	A	4872.83	0.929507	4.40512
AV63	R11	A	0	0.869148	4.04397
AV63	R11	A	4612.9	0.959358	5.83329
AV63	R11	A	3881.85	0.963377	3.72184
AV63	R11	A	5575.8	1.00015	4.51821
AV63	R11	A	2715.12	0.981103	4.66609
AV63	R11	A	3574.93	0.976886	4.27785
AV63	R11	A	3634.75	0.984266	5.96986
AV63	R11	A	3390.92	0.989735	3.34978
AV63	R11	A	4870.82	1.0584	6.08335
AV63	R11	A	5442.61	1.0578	4.01791
AV63	R11	A	4997.57	0.922918	4.39257
AV63	R11	A	3937.22	0.971548	5.5378
AV63	R11	A	2412.51	0.99639	3.38845
AV63	R11	A	1908.06	1.11032	4.11665
AV63	R11	A	4802.52	1.0043	1.91074
AV63	R11	A	5613.42	1.02868	5.15762
AV63	R11	A	5178.9	1.01135	5.4678
AV63	R11	A	3883.46	0.922127	4.26173
AV63	R11	A	3435.88	1.03421	3.40626
AV63	R11	A	0	0.923775	5.28125
AV63	R11	A	3733.3	0.894979	3.75317
AV63	R11	A	2807.23	0.958962	5.54964
AV63	R11	A	4454.29	0.99784	3.67049
AV63	R11	A	3495.29	0.922589	6.6651
AV63	R11	A	2986.56	0.984134	3.93634
AV63	R11	A	3595.54	0.898735	4.07849
AV63	R11	A	4467.68	1.02176	5.21781
AV63	R11	A	5390.62	0.993952	3.93919
AV63	R11	A	2983	1.0325	5.74639
AV63	R11	A	3568.86	0.98051	4.30742
AV63	R11	A	2319.84	1.06004	2.93169
AV63	R11	A	3879.35	1.11065	2.90921
AV63	R11	A	2520.69	0.989537	3.48224
AV63	R11	A	2844.02	1.01418	3.42563
AV63	R11	A	4042.99	0.995534	1.65223
AV63	R11	A	4873.22	1.10136	3.97514
AV63	R11	A	2736.68	1.00687	3.99893
AV63	R11	A	2041.4	1.1521	3.92691
AV63	R11	A	3672.83	1.01616	4.32081
AV63	R11	A	3506.01	1.00944	4.31827
AV63	R11	A	5034.68	1.07072	3.07522
AV63	R11	A	3357.86	0.973723	4.34284
AV63	R11	A	2989.14	0.986177	4.25366
AV63	R11	A	5075.67	0.928058	5.22555
AV63	R11	A	4581.94	1.02426	5.40559
AV63	R11	A	3930.32	1.00674	4.73564
AV63	R11	A	0	0.894781	3.03153
AV63	R11	A	3029.99	0.95402	4.07498
AV63	R11	A	3634.62	1.02057	3.95135
AV63	R11	A	6406.71	0.982091	2.45687
AV63	R11	A	974.652	1.02809	3.31123
AV63	R11	A	3128.85	0.967726	4.83256
AV63	R11	A	10208.6	0.908092	3.2799
AV63	R11	A	2333.81	1.02288	4.31229
AV63	R11	A	4222.88	0.988417	4.59947
AV63	R11	A	3394.23	1.04779	4.4538
AV63	R11	A	4370.02	1.01596	3.94036
AV63	R11	A	3390.06	1.0045	3.83045
AV63	R11	A	5335.3	1.0584	3.06345
AV63	R11	A	6282.51	0.968846	3.21523
AV63	R11	A	6493.97	0.928914	5.07936
AV63	R11	A	3311.72	0.950396	2.90921
AV63	R11	A	2755.47	1.03487	3.61244
AV63	R11	A	2843.87	1.03514	3.15146
AV63	R11	A	2704.52	1.10802	3.45716
AV63	R11	A	6059.67	0.920941	6.08842
AV63	R11	A	3737.78	0.917185	4.8087
AV63	R11	A	4874.4	0.953954	3.21158
AV63	R11	A	2584	1.03645	3.42407
AV63	R11	A	3245.76	0.958699	4.82924
AV63	R11	A	3088.41	0.955009	5.31654
AV63	R11	A	0	0.971812	3.27444
AV63	R11	A	0	0.893529	4.04404
AV63	R11	A	4561.59	1.08074	3.18117
AV63	R11	A	3745.5	1.44711	2.3957
AV63	R11	A	2236.76	1.06485	4.12256
AV63	R11	A	5747.31	0.996522	3.51695
AV63	R11	A	6879.5	1.03698	2.2243
AV63	R11	A	2982.65	0.978006	4.40934
AV63	R11	A	2985.04	1.04364	5.68522
AV63	R11	A	3379.97	0.994941	4.07036
AV63	R11	A	5129.97	0.928783	5.40293
AV63	R11	A	2209.23	0.987758	3.15666
AV63	R11	A	3055.87	0.977347	4.41818
AV63	R11	A	3198.59	0.968056	5.9984
AV63	R11	A	5393.47	0.982223	2.44543
AV63	R11	A	4663.35	1.04074	3.98372
AV63	R11	A	3544.14	0.999883	2.62015
AV63	R11	A	4660.17	1.02407	3.814
AV63	R11	A	3547.58	1.1239	4.43307
AV63	R11	A	0	0.97794	4.62254
AV63	R11	A	4435.27	1.20758	4.33511
AV63	R11	A	2910.18	1.03586	3.54399
AV63	R11	A	2605.17	0.944531	4.60947
AV63	R11	A	4339.27	0.979719	4.43898
AV63	R11	A	3895.53	1.06149	2.7354
AV63	R11	A	2756.36	0.967265	4.78498
AV63	R11	A	2044.31	1.00884	4.02467
AV63	R11	A	2883.5	1.01253	3.9301
AV63	R11	A	4285.27	0.950857	3.38247
AV63	R11	A	4240.32	1.02183	4.12087
AV63	R11	A	4566.73	0.968846	4.6529
AV63	R11	A	3506.25	1.00067	4.16962
AV63	R11	A	5126.73	0.976424	3.09062
AV63	R11	A	2760.09	1.01036	5.35249
AV63	R11	A	7135.47	1.064	2.03795
AV63	RØ	A	6895.47	1.00417	3.95635
AV63	RØ	A	7253.83	1.0095	4.65367
AV63	RØ	A	12635.5	0.980049	4.17183
AV63	RØ	A	7811.28	0.998235	3.83071
AV63	RØ	A	8302.98	0.93781	3.77871
AV63	RØ	A	6154.12	0.970823	3.68615
AV63	RØ	A	5456.26	0.979785	3.02952
AV63	RØ	A	8376.83	0.988812	4.32913
AV63	RØ	A	9851.23	1.06149	3.28464
AV63	RØ	A	6837.06	0.987495	4.16617
AV63	RØ	A	4133.42	1.05886	4.44197
AV63	RØ	A	6988.97	0.992437	3.73289
AV63	RØ	A	13091.7	0.991646	3.50149
AV63	RØ	A	7602.09	0.988154	5.17296
AV63	RØ	A	9104.55	1.09167	3.94368
AV63	RØ	A	5742.49	1.03731	3.73913
AV63	RØ	A	4492.54	1.00423	3.49654
AV63	RØ	A	7118.75	1.29779	2.02033
AV63	RØ	A	3990.31	1.05141	3.36849
AV63	RØ	A	3989.03	0.96654	4.26725
AV63	RØ	A	12362.9	1.0184	2.58277
AV63	RØ	A	6453.95	1.00627	2.96459
AV63	RØ	A	6654.28	1.02888	3.48725
AV63	RØ	A	7701.38	1.0528	2.81236
AV63	RØ	A	5057.59	1.10209	2.60006
AV63	RØ	A	6841.31	0.98677	2.83023
AV63	RØ	A	8186.3	0.972602	5.16347
AV63	RØ	A	5547.43	1.02393	4.46882
AV63	RØ	A	7118.4	0.967331	4.56865
AV63	RØ	A	7195.42	0.967265	5.08111
AV63	RØ	A	8304.18	1.02973	3.58605
AV63	RØ	A	12139.7	1.02295	3.65092
AV63	RØ	A	0	0.794621	3.42433
AV63	RØ	A	9761.47	0.952043	3.83871
AV63	RØ	A	7232.9	1.01062	2.81873
AV63	RØ	A	9742.11	0.961269	4.73044
AV63	RØ	A	7206.66	0.98789	4.15831
AV63	RØ	A	6718	0.984463	3.96883
AV63	RØ	A	5681.05	1.03573	3.95323
AV63	RØ	A	9622.66	1.02281	3.66425
AV63	RØ	A	7416.93	1.00581	5.48593
AV63	RØ	A	0	0.759763	2.81209
AV63	RØ	A	0	0.608463	3.46983
AV63	RØ	A	6301.39	1.04542	5.30062
AV63	RØ	A	4674.46	1.0379	3.78215
AV63	RØ	A	6326.42	1.02703	2.99455
AV63	RØ	A	6327.24	1.0665	3.51169
AV63	RØ	A	12001.3	0.930232	5.51115
AV63	RØ	A	5717.02	1.03323	3.34314
AV63	RØ	A	10539.5	1.00858	3.71228
AV63	RØ	A	9780.08	0.955668	3.93367
AV63	RØ	A	7676.37	0.963377	4.20589
AV63	RØ	A	6103.23	1.09082	4.34057
AV63	RØ	A	7776.85	1.0182	4.0961
AV63	RØ	A	8721.16	0.94262	2.89991
AV63	RØ	A	8602.63	0.97649	3.37175
AV63	RØ	A	6420.71	1.04159	2.77316
AV63	RØ	A	3160.19	1.10367	4.09721
AV63	RØ	A	6661.25	1.00239	4.86278
AV63	RØ	A	8732.15	0.989735	4.81708
AV63	RØ	A	10678	0.987692	2.62047
AV63	RØ	A	7806.65	1.0151	4.38542
AV63	RØ	A	6797.9	0.995929	4.18223
AV63	RØ	A	0	1.08054	3.31727
AV63	RØ	A	4689.99	1.09708	4.89125
AV63	RØ	A	8037.63	1.03072	3.57181
AV63	RØ	A	7608.26	1.01115	4.74123
AV63	RØ	A	5685.75	1.04904	3.67907
AV63	RØ	A	6734.64	1.07889	3.02952
AV63	RØ	A	6436.18	0.958237	4.55929
AV63	RØ	A	6549.38	1.04673	4.44606
AV63	RØ	A	0	0.77538	4.23631
AV63	RØ	A	11766	0.992634	4.54369
AV63	RØ	A	7858.44	1.08212	4.51074
AV63	RØ	A	0	0.853729	3.27425
AV63	RØ	A	0	0.795676	2.63205
AV63	RØ	A	9742.69	1.18518	3.30486
AV63	RØ	A	5183.23	1.00225	2.50198
AV63	RØ	A	5117.03	1.05089	3.2632
AV63	RØ	A	6617.83	1.06261	3.53866
AV63	RØ	A	0	0.655123	2.56802
AV63	RØ	A	6353.72	0.973393	4.35858
AV63	RØ	A	4880.94	1.02084	4.15357
AV63	RØ	A	7277.34	1.02387	3.87874
AV63	RØ	A	7929.97	0.963114	4.23761
AV63	RØ	A	6085.83	1.07065	3.05487
AV63	RØ	A	5897.59	1.02624	3.70968
AV63	RØ	A	2550.97	1.10492	3.23772
AV63	RØ	A	6341.34	0.986111	5.447
AV63	RØ	A	8233.72	0.96766	4.5125
AV63	RØ	A	6766.38	1.0099	4.67883
AV63	RØ	A	8645.6	1.00351	3.85957
AV63	RØ	A	14775	1.11764	1.33581
AV63	RØ	A	6173.36	1.05306	4.42422
AV63	RØ	A	7136.13	1.08739	3.78196
AV63	RØ	A	12312.8	1.00759	3.44565
AV63	RØ	A	7146.76	1.02888	4.73343
AV63	RØ	A	11664.8	1.04825	3.6012
AV63	RØ	A	10818.2	0.977347	3.70884
AV63	RØ	A	5469.21	1.03711	3.98528
AV63	RØ	A	6225.19	1.03837	3.07534
AV63	RØ	A	7432	0.974909	4.2809
AV63	RØ	A	6124.02	1.01339	5.37108
AV63	RØ	A	8048.48	1.00028	4.75774
AV63	RØ	A	8117.89	1.02136	4.01895
AV63	RØ	A	11167.5	0.980378	4.42865
AV63	RØ	A	6245.32	0.990064	4.69982
AV63	RØ	A	4384.32	1.0358	3.38429
AV63	RØ	A	5329.05	1.0692	2.74716
AV63	RØ	A	4805.26	1.03481	3.84117
AV63	RØ	A	7530.06	1.03395	2.65753
AV63	RØ	A	7668.81	1.10828	4.38087
AV63	RØ	A	5204.61	0.999619	3.90877
AV63	RØ	A	8491.62	1.02255	2.69516
AV63	RØ	A	6061.82	1.0244	4.19477
AV63	RØ	A	7880.47	1.03362	3.91501
AV63	RØ	A	5988.01	1.05247	2.25745
AV63	RØ	A	6433.37	1.00456	5.15125
AV63	RØ	A	6554.18	1.04245	4.88943
AV63	RØ	A	8791.15	1.0667	3.82116
AV63	RØ	A	8508.95	1.06696	4.19211
AV63	RØ	A	6216.54	1.02624	3.16277
AV63	RØ	A	7562	1.01754	3.37506
AV63	RØ	A	8087.54	0.979983	4.35923
AV63	RØ	A	7307.83	0.958765	4.80675
AV63	RØ	A	6925.7	0.974843	3.7399
AV63	RØ	A	5200.82	0.99527	3.24928
AV63	RØ	A	6384.53	1.02051	4.9749
AV63	RØ	A	9438.78	0.991646	3.79177
AV63	RØ	A	7440.66	0.978269	4.94
AV63	RØ	A	5258.55	1.13595	3.11987
AV63	RØ	A	7594.83	0.99415	3.42128
AV63	RØ	A	11727.9	1.16218	3.31909
AV63	RØ	A	5569.38	0.987692	4.54779
AV63	RØ	A	8123.7	0.969044	4.13537
AV63	RØ	A	7803.58	1.07909	3.2281
AV63	RØ	A	9571.64	1.05207	3.54646
AV63	RØ	A	8657.79	1.0727	3.64448
AV63	RØ	A	8084.26	1.01451	3.86347
AV63	RØ	A	5485.76	1.02611	3.68479
AV63	RØ	A	5769.5	1.01932	4.09994
AV63	RØ	A	14520.5	1.03533	3.69779
AV63	RØ	A	8008.87	1.0528	2.21988
AV63	RØ	A	11982.8	1.04785	4.30976
AV63	RØ	A	5981.34	1.01662	4.7591
AV63	RØ	A	9338.96	1.06947	4.09155
AV63	RØ	A	12582.7	1.00186	3.40841
AV63	RØ	A	5396.69	1.00832	2.99442
AV63	RØ	A	10574.8	1.16482	2.29989
AV63	RØ	A	5958.72	0.996324	4.69358
AV63	RØ	A	5442.6	1.07336	3.51221
AV63	RØ	A	8391.73	0.988351	4.9738
AV63	RØ	A	4668.03	1.21786	3.11213
AV63	RØ	A	4818.17	1.17865	2.78844
AV63	RØ	A	6311.12	1.04594	5.40442
AV63	RØ	A	8167.16	1.25562	3.65729
AV63	RØ	A	6749.61	0.984661	3.79906
AV63	RØ	A	8944.41	1.05919	3.21503
AV63	RØ	A	7650	1.05438	3.45839
AV63	RØ	A	7106.78	1.00858	3.18513
AV63	RØ	A	11521.5	1.02756	3.38266
AV63	RØ	A	9416.16	1.05082	3.09881
AV63	RØ	A	6536.25	1.15184	2.80924
AV63	RØ	A	4971.96	1.03863	3.3735
AV63	RØ	A	4872.11	1.03428	3.42583
AV63	RØ	A	9935.96	1.00805	4.52166
AV63	RØ	A	9530.33	1.01576	3.46099
AV63	RØ	A	5439	1.11144	3.29121
AV63	RØ	A	6627.71	1.04785	4.5682
AV63	RØ	A	6305.82	1.01023	3.80972
AV63	RØ	A	6296.63	0.953295	4.41506
AV63	RØ	A	5045.94	1.01642	3.90721
AV63	RØ	A	11633.3	0.979587	3.88342
AV63	RØ	A	5136.29	1.0128	4.51828
AV63	RØ	A	4197.04	1.04792	4.08993
AV63	RØ	A	6356	0.964432	3.18734
AV63	RØ	A	4925.86	1.04199	3.01593
AV63	RØ	A	9049.67	1.16455	3.30206
AV63	RØ	A	6651.45	1.01181	3.08386
AV63	RØ	A	5081.89	1.01616	4.34343
AV63	RØ	A	8930.86	1.02657	2.90875
AV63	RØ	A	10162.8	0.969242	4.16331
AV63	RØ	A	6147.08	1.05846	2.80742
AV63	RØ	A	5383.2	1.01543	3.50844
AV63	RØ	A	8234.89	1.05049	4.09727
AV63	RØ	A	10589.6	0.942357	4.00446
AV63	RØ	A	7230.86	0.961598	4.79414
AV63	RØ	A	13753.6	0.978665	2.80884
AV63	RØ	A	7879.1	0.971285	3.77916
AV63	RØ	A	4957.26	1.03922	4.58906
AV63	RØ	A	7846.55	0.964695	5.29282
AV63	RØ	A	4411.64	1.00028	3.63591
AV63	RØ	A	6681.97	1.02347	3.91846
AV63	RØ	A	8121.8	0.997906	3.51383
AV63	RØ	A	3983.46	1.09016	4.15753
AV63	RØ	A	0	0.908948	3.58573
AV63	RØ	A	0	0.730243	3.74894
AV63	RØ	A	0	0.929244	3.29056
AV63	RØ	A	10178.1	1.00568	4.77288
AV63	RØ	A	6614.14	1.08225	2.49932
AV63	RØ	A	7318.42	1.07098	3.75291
AV63	RØ	A	5415.71	1.00081	4.96314
AV63	RØ	A	6747.95	0.976688	5.01248
AV63	RØ	A	6601.1	1.04792	3.60315
AV63	RØ	A	4615.94	1.007	4.19809
AV63	RØ	A	5855.4	0.972602	4.28057
AV63	RØ	A	6246.67	1.03586	4.1132
AV63	RØ	A	4405.88	1.01477	4.6163
AV63	RØ	A	9125.87	1.07421	3.58624
AV63	RØ	A	9088.54	1.04805	3.73171
AV63	RØ	A	5940.25	1.04258	3.60464
AV63	RØ	A	6176.08	1.00305	5.05544
AV63	RØ	A	6797.27	1.01135	3.68127
AV63	RØ	A	5873.05	1.01721	4.21564
AV63	RØ	A	11162.7	0.968649	5.07812
AV63	RØ	A	5583.43	1.02288	2.96881
AV63	RØ	A	0	0.954745	3.25253
AV63	RØ	A	0	0.890234	2.67858
AV63	RØ	A	5496.34	1.03355	4.1041
AV63	RØ	A	6458.58	1.00245	3.99315
AV63	RØ	A	6787.03	1.02736	3.24604
AV63	RØ	A	6335.14	1.08363	3.97793
AV63	RØ	A	5347.25	0.992964	2.75535
AV63	RØ	A	6125.56	0.978467	3.30129
AV63	RØ	A	4562.64	0.984134	4.28181
AV63	RØ	A	7778.57	1.00324	4.61376
AV63	RØ	A	10370.5	1.0157	3.32807
AV63	RØ	A	12764.1	1.0723	2.64992
AV63	RØ	A	11047.4	0.984925	3.79711
AV63	RØ	A	13366	1.13675	2.17633
AV63	RØ	A	8112.46	0.971087	4.68734
AV63	RØ	A	6398.02	1.00463	2.48027
AV63	RØ	A	0	0.946706	4.24996
AV63	RØ	A	5910.61	1.0441	3.3837
AV63	RØ	A	6725.54	0.913363	4.49247
AV63	RØ	A	5342.44	1.02881	4.24723
AV63	RØ	A	11145.5	1.05827	3.81823
AV63	RØ	A	14112.7	0.960807	3.62752
AV63	RØ	A	7499.33	0.885358	4.57568
AV63	RØ	A	6761.34	0.985452	4.8581
AV63	RØ	A	7119.32	1.04278	3.95648
AV63	RØ	A	6415.71	1.06011	4.28474
AV63	RØ	A	5707.6	1.06538	4.09663
AV63	RØ	A	4872.66	1.03593	5.40404
AV63	RØ	A	9441.43	0.95804	3.58013
AV63	RØ	A	7065.64	0.973393	3.23979
AV63	RØ	A	10142.9	1.08311	3.92711
AV63	RØ	A	5370.52	1.03204	4.54629
AV63	RØ	A	9074.68	0.970098	2.85682
AV63	RØ	A	8607.15	1.20673	2.93573
AV63	RØ	A	8476.5	1.00772	4.43462
AV63	RØ	A	8516.43	0.996983	4.50912
AV63	RØ	A	9902.91	1.03718	3.10174
AV63	RØ	A	7227.93	1.02538	3.07723
AV63	RØ	A	5388.14	1.01082	3.68355
AV63	RØ	A	5413.74	1.04858	3.32007
AV63	RØ	A	6287.93	1.02031	5.03542
AV63	RØ	A	6535.03	1.00489	2.90634
AV63	RØ	A	7104.64	1.00772	4.06724
AV63	RØ	A	8170.95	0.928651	4.24782
AV63	RØ	A	8299.39	1.0101	2.98057
AV63	RØ	A	7074.92	1.01069	3.23706
AV63	RØ	A	10796	1.01853	3.40912
AV63	RØ	A	11222	1.04094	3.24578
AV63	RØ	A	6044.3	0.965815	3.87459
AV63	RØ	A	8018.65	0.955733	3.03394
AV63	RØ	A	5323.65	0.968583	3.61881
AV63	RØ	A	5754.72	0.952702	5.88315
AV63	RØ	A	13151.2	1.03481	3.3139
AV63	RØ	A	6930.88	0.995007	5.26318
AV63	RØ	A	3749.85	1.00298	3.70227
AV63	RØ	A	5924.87	0.949737	4.0859
AV63	RØ	A	4903.18	0.99158	4.07219
AV63	RØ	A	6607.1	1.07823	3.10589
AV63	RØ	A	6389.8	1.01912	5.61346
AV63	RØ	A	8607.23	0.980707	4.6813
AV63	RØ	A	7453.25	1.0184	3.28653
AV63	RØ	A	6913.49	1.03896	3.98567
AV63	RØ	A	6520.77	1.32652	3.80868
AV63	RØ	A	7416.9	1.0408	3.57045
AV63	RØ	A	6392.47	0.973986	5.512
AV63	RØ	A	6806.74	1.02222	3.8636
AV63	RØ	A	6897.95	1.04528	4.39133
AV63	RØ	A	0	0.829611	3.66269
AV63	RØ	A	8894.24	0.998828	3.82402
AV63	RØ	A	10553.9	1.04963	3.67607
AV63	RØ	A	4383.67	1.02143	5.05115
AV63	RØ	A	7002.77	0.99013	4.13153
AV63	RØ	A	5967.3	0.996786	4.83516
AV63	RØ	A	11205.6	0.984595	2.92727
AV63	RØ	A	6766.9	0.987429	4.0651
AV63	RØ	A	5356.06	1.06901	4.09136
AV63	RØ	A	8566.27	1.07184	2.89516
AV63	RØ	A	5850.82	1.03639	6.21068
AV63	RØ	A	7281.06	0.992832	5.0091
AV63	RØ	A	7246.74	0.977017	4.11814
AV63	RØ	A	5753.45	1.13826	3.01672
AV63	RØ	A	7025.15	1.06136	3.45364
AV63	RØ	A	4981.26	1.0182	3.2112
AV63	RØ	A	10738.4	1.01728	4.08811
AV63	RØ	A	10970.8	1.04779	3.45813
AV63	RØ	A	0	0.81808	3.15763
AV63	RØ	A	5893.83	1.0984	2.51628
AV63	RØ	A	5904.34	1.0412	3.34854
AV63	RØ	A	7881.45	0.9927	3.30473
AV63	RØ	A	6642.87	0.986967	4.13374
AV63	RØ	A	7727.95	1.01319	4.23124
AV63	RØ	A	7668.59	0.97794	4.14141
AV63	RØ	A	4101.9	1.01504	3.48504
AV63	RØ	A	5654.91	1.0244	4.27778
AV63	RØ	A	5460.62	1.05095	3.51396
AV63	RØ	A	10063.1	1.087	3.31188
AV63	RØ	A	4244.78	1.04911	5.78266
AV63	RØ	A	6876.01	0.949671	3.82973
AV63	RØ	A	6653.43	1.01306	3.718
AV63	RØ	A	4894.8	1.04759	3.17616
AV63	RØ	A	6621.23	0.973261	4.46518
AV63	RØ	A	4805.21	1.02591	3.73698
AV63	RØ	A	6308.28	1.02868	4.33212
AV63	RØ	A	3009.29	1.03665	3.84033
AV63	RØ	A	6285.83	1.0522	2.83712
AV63	RØ	A	11305.5	0.916658	2.88522
AV63	RØ	A	5478.63	1.06051	4.25997
AV63	RØ	A	0	0.846151	2.85682
AV63	RØ	A	4787.84	1.01761	4.11528
AV63	RØ	A	7662.81	1.00048	2.98643
AV63	RØ	A	7001.92	1.00054	4.03059
AV63	RØ	A	7360.42	0.954943	4.402
AV63	RØ	A	6741.76	0.994084	4.27414
AV63	RØ	A	9197	1.00772	4.27947
AV63	RØ	A	5968.81	1.05339	4.25152
AV63	RØ	A	5664.18	0.990064	3.32189
AV63	RØ	A	6944.73	1.06571	4.74766
AV63	RØ	A	8926.59	0.973064	4.64763
AV63	RØ	A	5187.19	1.02393	2.85175
AV63	RØ	A	8252.37	0.991712	3.94713
AV63	RØ	A	5231.2	0.977281	4.8516
AV63	RØ	A	12438.1	1.04482	3.14009
AV63	RØ	A	7581.3	1.02479	5.5471
AV63	RØ	A	5324.77	1.05115	3.40769
AV63	RØ	A	12205.1	1.11507	3.07827
AV63	RØ	A	9059.55	1.04673	3.63818
AV63	RØ	A	5569.88	1.02222	3.54399
AV63	RØ	A	6924.84	1.01649	3.58898
AV63	RØ	A	13891.8	1.00463	1.74194
AV63	RØ	A	4226.39	1.0528	3.33144
AV63	RØ	A	6984.89	0.978862	4.11339
AV63	RØ	A	5394	1.00957	3.61745
AV63	RØ	A	9917.52	0.999685	5.05823
AV63	RØ	A	6679.32	0.998565	5.0858
AV63	RØ	A	4123.46	1.08561	4.47766
AV63	RØ	A	7703.23	0.968912	5.32337
AV63	RØ	A	7939.87	0.960807	3.76324
AV63	RØ	A	12163.8	1.00726	3.47477
AV63	RØ	A	8959.85	1.04548	3.7689
AV63	RØ	A	5293.63	0.998367	3.2697
AV63	RØ	A	6909.62	1.05108	3.17824
AV63	RØ	A	5357.85	1.00496	4.11398
AV63	RØ	A	4600.48	1.07553	3.54016
AV63	RØ	A	6515.48	0.988615	4.74702
AV63	RØ	A	5135.34	1.05879	3.42778
AV63	RØ	A	5557.99	1.02057	4.81143
AV63	RØ	A	5560.9	1.08054	4.29279
AV63	RØ	A	7248.54	0.972537	3.92944
AV63	RØ	A	7570.04	0.95066	3.41146
AV63	RØ	A	7519.17	0.956261	5.13071
AV63	RØ	A	4957.85	1.07948	3.36329
AV63	RØ	A	9137.18	0.954152	3.87686
AV63	RØ	A	8986.8	1.0414	4.94071
AV63	RØ	A	8634.59	1.00357	3.19709
AV63	RØ	A	13386.4	1.04225	3.96695
AV63	RØ	A	12313.9	0.995995	2.5896
AV63	RØ	A	5493.68	1.02822	4.07407
AV63	RØ	A	9300.73	0.978994	3.9767
AV63	RØ	A	8299.14	1.02248	4.09305
AV63	RØ	A	8137.35	1.10683	3.7178
AV63	RØ	A	10538.1	0.981564	3.88485
AV63	RØ	A	10248.9	0.977545	4.58737
AV63	RØ	A	6798.83	0.964893	4.41955
AV63	RØ	A	9052.96	1.14413	2.37309
AV63	RØ	A	11276.7	0.987692	3.8287
AV63	RØ	A	7674.96	0.993689	4.08707
AV63	RØ	A	6872.13	0.964563	4.86454
AV63	RØ	A	6246.77	1.06308	3.38982
AV63	RØ	A	7354.63	0.971219	3.98476
AV63	RØ	A	6593.73	0.936954	4.29234
AV63	RØ	A	6179.12	0.988417	4.65959
AV63	RØ	A	6799.07	1.0294	2.87079
AV63	RØ	A	4651.55	1.09055	2.77316
AV63	RØ	A	7046.23	1.06782	3.00255
AV63	RØ	A	5854.8	1.04614	2.48346
AV63	RØ	A	8948.28	0.98644	2.7222
AV63	RØ	A	5184.34	1.01431	4.73746
AV63	RØ	A	6815.03	1.02631	3.63707
AV63	RØ	A	6682.81	0.945454	5.79429
AV63	RØ	A	6148.99	0.940578	4.61688
AV63	RØ	A	4620.31	0.99191	3.35771
AV63	RØ	A	5122.55	1.06459	4.06062
AV63	RØ	A	5711.06	1.15553	3.53606
AV63	RØ	A	4598.31	1.02005	2.8602
AV63	RØ	A	6817	1.13194	2.31413
AV63	RØ	A	8396.02	1.01622	4.26257
AV63	RØ	A	8723.34	1.0124	3.98236
AV63	RØ	A	0	0.952834	3.3308
AV63	RØ	A	6239.77	1.0435	3.89486
AV63	RØ	A	8123.19	1.02466	3.00047
AV63	RØ	A	5773.67	1.0356	3.25936
AV63	RØ	A	12570.2	0.984134	3.22485
AV63	RØ	A	7486.02	0.987956	3.75258
AV63	RØ	A	6748.42	1.03889	3.95038
AV63	RØ	A	5667.35	1.01708	2.93832
AV63	RØ	A	5772.7	1.0153	2.67781
AV63	RØ	A	6911.78	0.981037	5.26558
AV63	RØ	A	9219.5	0.986572	4.4055
AV63	RØ	A	9198.39	0.982223	4.4278
AV63	RØ	A	8239.29	0.99046	2.61235
AV63	RØ	A	4014.44	0.994545	4.11736
AV63	RØ	A	6728.1	1.01477	2.7183
AV63	RØ	A	4905.14	1.01227	5.03834
AV63	RØ	A	4391.8	1.0551	4.67766
AV63	RØ	A	6167.58	1.02117	3.7191
AV63	RØ	A	5115.23	1.02071	3.54289
AV63	RØ	A	4781.75	0.99191	4.12523
AV63	RØ	A	4794.79	1.03902	3.73068
AV63	RØ	A	11793.6	0.922061	4.60571
AV63	RØ	A	9323.84	1.02288	2.45492
AV63	RØ	A	8016.87	0.992107	4.43917
AV63	RØ	A	6533.17	1.02565	4.24125
AV63	RØ	A	8181.2	1.03263	3.31422
AV63	RØ	A	4316.83	1.12759	3.76655
AV63	RØ	A	8597.69	0.966738	2.74085
AV63	RØ	A	6196.35	1.01043	5.01345
AV63	RØ	A	4807.15	0.962784	3.53866
AV63	RØ	A	5893.38	0.954745	3.86523
AV63	RØ	A	4188.11	1.04607	3.47685
AV63	RØ	A	6093.48	1.11559	2.47468
AV63	RØ	A	6907.1	1.07105	3.88635
AV63	RØ	A	7763.33	1.07869	4.34051
AV63	RØ	A	6639.1	1.06485	4.62995
AV63	RØ	A	5352.45	1.05332	3.37207
AV63	RØ	A	6954.57	0.991185	3.62303
AV63	RØ	A	5386.82	0.992766	5.11446
AV63	RØ	A	4993.46	1.01161	3.88966
AV63	RØ	A	6983.75	1.03909	3.58891
AV63	RØ	A	10168.2	1.0128	3.64364
AV63	RØ	A	6530.09	0.943148	3.83591
AV63	RØ	A	7896.5	0.965552	2.91857
AV63	RØ	A	6072.36	0.963311	3.90539
AV63	RØ	A	7623.92	1.04001	3.1497
AV63	RØ	A	9002.95	0.992305	4.82196
AV63	RØ	A	6622.68	0.981301	5.26526
AV63	RØ	A	9960.5	1.02275	2.8834
AV63	RØ	A	10114.9	0.983607	5.17394
AV63	RØ	A	7017.47	0.995402	5.41034
AV63	RØ	A	4375	1.03599	4.18171
AV63	RØ	A	6967.21	1.0126	4.44451
AV63	RØ	A	7012.58	0.987165	5.01553
AV63	RØ	A	7166.03	1.00515	3.09335
AV63	RØ	A	10915.9	0.943807	4.36247
AV63	RØ	A	4796.08	1.05313	4.27355
AV63	RØ	A	19169.1	1.13029	1.59881
AV63	RØ	A	3143.97	1.00627	3.44571
AV63	RØ	A	11598.8	1.07546	3.74673
AV63	RØ	A	6129.18	0.961269	2.7742
AV63	RØ	A	7783.19	0.967529	3.72788
AV63	RØ	A	3307.07	0.965025	4.51159
AV63	RØ	A	5078.88	1.00832	5.11855
AV63	RØ	A	9406.73	1.00733	4.24587
AV63	RØ	A	5224.76	0.987561	4.32555
AV63	RØ	A	8833.81	1.06255	2.67001
AV63	RØ	A	6108.86	1.05879	3.36797
AV63	RØ	A	8737.76	0.9728	5.87399
AV63	RØ	A	5892.94	1.00456	2.9421
AV63	RØ	A	9256.54	0.988285	5.37167
AV63	RØ	A	5424.46	0.995204	4.38094
AV63	RØ	A	6649.44	1.01972	3.75336
AV63	RØ	A	4723.97	1.0184	4.43215
AV63	RØ	A	6054.76	1.00265	3.38442
AV63	RØ	A	4792.13	1.0209	3.75583
AV63	RØ	A	6289.73	1.01089	3.45722
AV63	RØ	A	0	0.753372	2.9718
AV63	RØ	A	6398.69	1.03705	4.45874
AV63	RØ	A	7887.57	1.05036	4.21538
AV63	RØ	A	5478.89	1.01715	3.70981
AV63	RØ	A	5847.95	0.980576	3.52697
AV63	RØ	A	5613.12	1.07283	3.32014
AV63	RØ	A	7767.28	1.0435	3.54555
AV63	RØ	A	5347.69	1.09345	3.69129
AV63	RØ	A	9062.17	0.968385	4.52946
AV63	RØ	A	10565.2	0.925883	4.15097
AV63	RØ	A	7712.17	1.02117	4.30203
AV63	RØ	A	7092.35	1.01728	4.5736
AV63	RØ	A	6247.61	1.02347	4.186
AV63	RØ	A	3940.35	1.06617	3.38409
AV63	RØ	A	6264.1	0.987824	4.97705
AV63	RØ	A	8580.75	1.04588	3.11259
AV63	RØ	A	3479.63	1.06617	3.71391
AV63	RØ	A	7706.96	0.95771	2.85727
AV63	RØ	A	6146.26	1.02295	2.82886
AV63	RØ	A	0	0.985715	2.94014
AV63	RØ	A	6456.15	1.03197	3.19585
AV63	RØ	A	8668.97	0.968583	4.90379
AV63	RØ	A	5097.56	1.06084	3.40782
AV63	RØ	A	6648.18	0.986111	3.65573
AV63	RØ	A	7732.15	0.981432	4.31067
AV63	RØ	A	0	1.08891	2.72447
AV63	RØ	A	4937.75	1.0669	3.24194
AV63	RØ	A	7279.33	0.999883	3.99425
AV63	RØ	A	5467.72	1.08858	3.81921
AV63	RØ	A	6711.36	1.0014	3.4851
AV63	RØ	A	10353.3	1.04746	3.44955
AV63	RØ	A	6468.43	1.04897	3.74023
AV63	RØ	A	5309.1	1.05319	3.76604
AV63	RØ	A	6492.44	1.05596	3.47029
AV63	RØ	A	5359.42	1.14729	3.24214
AV63	RØ	A	11903.4	1.05622	4.33862
AV63	RØ	A	5935.56	0.953032	2.82633
AV63	RØ	A	9007.69	1.04687	3.16244
AV63	RØ	A	7911.85	0.977676	4.09695
AV63	RØ	A	5922.1	1.01682	4.10696
AV63	RØ	A	5543.62	1.0868	3.41816
AV63	RØ	A	4354.23	0.962323	5.07403
AV63	RØ	A	5507.06	0.946442	4.91524
AV63	RØ	A	7074.78	1.0866	4.03156
AV63	RØ	A	4752.74	1.03692	4.0079
AV63	RØ	A	5566.55	1.08752	2.63789
AV63	RØ	A	7794.66	0.996654	3.53216
AV63	RØ	A	9818.24	0.952043	3.12143
AV63	RØ	A	8692.08	0.989933	2.7168
AV63	RØ	A	12183.3	1.04825	3.01866
AV63	RØ	A	12347.2	1.12528	2.73384
AV63	RØ	A	5294.79	1.0435	2.761
AV63	RØ	A	8315.83	1.02097	3.04025
AV63	RØ	A	9547.06	1.23302	1.91945
AV63	RØ	A	5842.8	1.035	3.89214
AV63	RØ	A	9277.51	0.954284	3.30941
AV63	RØ	A	6700	1.01108	3.26463
AV63	RØ	A	10169.8	0.98308	3.224
AV63	RØ	A	7818.01	0.97425	4.81656
AV63	RØ	A	13714.3	1.13306	3.70649
AV63	RØ	A	8300	1.0043	3.65709
AV63	RØ	A	7446.71	1.03988	3.76727
AV63	RØ	A	8502.74	0.966408	3.35335
AV63	RØ	A	8269.1	1.03026	3.31636
AV63	RØ	A	5753.86	1.01662	4.44736
AV63	RØ	A	8670.02	0.942752	2.86618
AV63	RØ	A	3835.85	1.05392	4.08298
AV63	RØ	A	9420	1.013	1.95299
AV63	RØ	A	6288.57	1.0041	3.33242
AV63	RØ	A	7754.26	0.965025	3.88212
AV63	RØ	A	0	0.964102	3.76967
AV63	RØ	A	7753.93	1.04074	3.791
AV63	RØ	A	7366.9	1.02156	4.60876
AV63	RØ	A	9657.78	1.02222	3.85905
AV63	RØ	A	5519.41	1.00739	3.71312
AV63	RØ	A	5611.16	0.960478	3.9052
AV63	RØ	A	5825.13	0.994414	5.00064
AV63	RØ	A	7619.32	0.944795	3.60821
AV63	RØ	A	7120.29	1.05523	4.70002
AV63	RØ	A	6474.93	0.994875	4.12009
AV63	RØ	A	14504.7	1.16877	2.36249
AV63	RØ	A	11386.9	1.01365	3.6298
AV63	RØ	A	6154.5	0.980971	4.31698
AV63	RØ	A	5411.09	0.992964	4.45861
AV63	RØ	A	8261.35	1.05721	3.59599
AV63	RØ	A	13915.5	0.944268	4.4486
AV63	RØ	A	0	0.984134	2.62275
AV63	RØ	A	7830.11	1.0238	4.28955
AV63	RØ	A	12419.8	1.00028	4.23442
AV63	RØ	A	7709.37	0.99639	3.31494
AV63	RØ	A	9116.51	0.969901	4.94358
AV63	RØ	A	0	0.88147	3.04148
AV63	RØ	A	9935.53	0.960939	4.2499
AV63	RØ	A	5183.8	1.0097	3.71585
AV63	RØ	A	8400	0.988088	3.93946
AV63	RØ	A	6178.25	1.09978	3.56408
AV63	RØ	A	11279.2	1.01155	3.14002
AV63	RØ	A	7085.55	1.02545	4.14817
AV63	RØ	A	5614.94	0.968715	4.1717
AV63	RØ	A	4388.2	1.06011	3.3202
AV63	RØ	A	9507.63	1.05807	2.94632
AV63	RØ	A	6409.71	1.01629	3.36557
AV63	RØ	A	5486.69	1.11026	3.95648
AV63	RØ	A	7788.39	0.998301	4.10039
AV63	RØ	A	4989.12	0.979851	3.46996
AV63	RØ	A	4867.15	1.07158	3.18292
AV63	RØ	A	5522.14	0.980971	4.18808
AV63	RØ	A	5662.25	0.944993	4.72063
AV63	RØ	A	7594.46	0.995336	4.75664
AV63	RØ	A	8550.56	0.977017	3.93276
AV63	RØ	A	6846.98	0.999224	3.87153
AV63	RØ	A	7938.13	1.01774	3.34282
AV63	RØ	A	4236.1	0.98308	3.47477
AV63	RØ	A	6551.39	1.03553	3.93269
AV63	RØ	A	6754.77	1.00786	3.99132
AV63	RØ	A	7807.64	0.999883	4.64665
AV63	RØ	A	5686.18	1.03276	2.68976
AV63	RØ	A	6870.09	1.0385	3.05474
AV63	RØ	A	0	0.688136	1.55617
AV63	RØ	A	3227.22	1.05978	3.22179
AV63	RØ	A	7001.27	0.954284	5.05999
AV63	RØ	A	6010.55	0.939523	4.2952
AV63	RØ	A	6396.04	1.03243	2.9484
AV63	RØ	A	5715.37	1.02637	4.71204
AV63	RØ	A	6353.79	1.02901	3.76636
AV63	RØ	A	10799	0.991316	3.99269
AV63	RØ	A	6855.25	1.03889	3.76266
AV63	RØ	A	5283.7	1.03276	4.21863
AV63	RØ	A	8746.33	1.01708	3.40522
AV63	RØ	A	7688.67	1.00001	3.42485
AV63	RØ	A	8260.42	0.933791	4.56131
AV63	RØ	A	8736.73	0.999949	4.58828
AV63	RØ	A	6152.93	1.14327	2.94723
AV63	RØ	A	7684.64	1.02117	4.11931
AV63	RØ	A	6660.19	1.04687	3.62921
AV63	RØ	A	10691.7	1.0613	4.0107
AV63	RØ	A	6387.24	1.10564	3.18903
AV63	RØ	A	4360.83	1.01497	5.19831
AV63	RØ	A	0	0.983541	4.04599
AV63	RØ	A	6846.76	1.04976	3.67776
AV63	RØ	A	4876.43	1.10802	3.46879
AV63	RØ	A	6563.99	0.977676	5.62477
AV63	RØ	A	3669.89	0.948024	4.70717
AV63	RØ	A	6313.71	1.05695	2.89647
AV63	RØ	A	3345.28	1.12185	3.73171
AV63	RØ	A	4814.61	1.03981	3.95141
AV63	RØ	A	5722	1.07204	3.44351
AV63	RØ	A	7585.26	0.961532	3.24155
AV63	RØ	A	5528.45	1.04206	4.65569
AV63	RØ	A	5269.1	1.06044	2.49659
AV63	RØ	A	7195.35	1.05985	2.71486
AV63	RØ	A	8080.61	1.02387	3.32884
AV63	RØ	A	5118.28	1.04113	3.91235
AV63	RØ	A	7457.96	1.01234	4.54753
AV63	RØ	A	7458.54	1.01148	4.64997
AV63	RØ	A	9807.83	1.00996	3.58312
AV63	RØ	A	5970.22	1.05734	3.20756
AV63	RØ	A	7129.63	1.02809	3.84533
AV63	RØ	A	5295.73	1.01866	3.406
AV63	RØ	A	5650.48	0.967001	3.98645
AV63	RØ	A	0	0.826844	2.5235
AV63	RØ	A	9772.87	1.00463	3.62732
AV63	RØ	A	0	0.798443	2.68534
AV63	RØ	A	7560.16	1.03698	3.55335
AV63	RØ	A	0	1.0383	4.71945
AV63	RØ	A	7189.05	0.928849	5.35158
AV63	RØ	A	6184.9	1.06406	3.98522
AV63	RØ	A	5799.12	1.06176	4.77113
AV63	RØ	A	4905.75	0.990328	3.27418
AV63	RØ	A	6505.88	1.01959	3.42589
AV63	RØ	A	6720.75	0.977545	4.19952
AV63	RØ	A	3507.32	1.04667	3.26183
AV63	RØ	A	2692.39	1.14261	3.46586
AV63	RØ	A	7079.61	1.09965	2.45174
AV63	RØ	A	4927.83	1.0437	4.90484
AV63	RØ	A	9110.41	0.989801	3.1616
AV63	RØ	A	8449.7	1.01471	3.88693
AV63	RØ	A	6374.77	1.01741	3.09777
AV63	RØ	A	5786.96	0.958699	3.8649
AV63	RØ	A	8348.6	0.999224	4.11989
AV63	RØ	A	8020.68	1.04021	3.56649
AV63	RØ	A	13657.5	0.983541	3.5581
AV63	RØ	A	9106.51	1.02472	3.35959
AV63	RØ	A	9230.08	1.05056	2.78421
AV63	RØ	A	8955.16	0.983673	2.891
AV63	RØ	A	8247.63	0.963311	4.25925
AV63	RØ	A	6878.79	1.03731	4.57151
AV63	RØ	A	7739.99	0.972339	4.49625
AV63	RØ	A	8509.29	1.00812	3.45241
AV63	RØ	A	4191.03	1.00759	4.51204
AV63	RØ	A	11023.1	0.993227	3.24916
AV63	RØ	A	9230.97	1.04647	3.22686
AV63	RØ	A	0	0.951253	4.96321
AV63	RØ	A	0	0.75917	3.5215
AV63	RØ	A	4204.66	1.03566	3.90884
AV63	RØ	A	6282.3	1.02624	4.95423
AV63	RØ	A	6488.47	1.08001	3.39092
AV63	RØ	A	4727.02	0.966672	4.07537
AV63	RØ	A	7981.82	1.03085	2.36873
AV63	RØ	A	5143.34	1.00931	3.20203
AV63	RØ	A	5478.75	1.03296	4.08811
AV63	RØ	A	3740.43	1.0613	3.80049
AV63	RØ	A	8323.22	0.977215	3.95408
AV63	RØ	A	11808.3	1.04304	4.46739
AV63	RØ	A	7000.13	1.04713	2.87794
AV63	RØ	A	5381.17	1.02598	4.56475
AV63	RØ	A	9459.18	0.997708	3.6597
AV63	RØ	A	6191.3	1.00225	2.94892
AV63	RØ	A	7133.11	0.951384	5.24076
AV63	RØ	A	9754.22	1.02071	3.10622
AV63	RØ	A	7896.99	1.0379	2.74924
AV63	RØ	A	22212.1	1.61316	1.78659
AV63	RØ	A	4522.18	1.03138	3.30122
AV63	RØ	A	6198.68	1.12521	3.37915
AV63	RØ	A	7357.14	0.978797	4.93785
AV63	RØ	A	18946.6	0.979521	1.64762
AV63	RØ	A	6047.67	0.953757	4.72244
AV63	RØ	A	5640.39	0.926147	5.37875
AV63	RØ	A	9337.35	0.995204	3.61283
AV63	RØ	A	5513.28	1.01043	3.5219
AV63	RØ	A	5842	1.00324	5.74301
AV63	RØ	A	8988.74	1.03672	3.7854
AV63	RØ	A	4665.84	1.10591	4.47694
AV63	RØ	A	6122.82	1.01563	4.48832
AV63	RØ	A	9250.42	0.98051	3.72626
AV63	RØ	A	5284.73	1.0495	3.18194
AV63	RØ	A	4329.5	1.05009	4.08148
AV63	RØ	A	9806.02	1.00535	3.54061
AV63	RØ	A	7201.82	1.05596	3.50558
AV63	RØ	A	7134.75	1.03988	3.80536
AV63	RØ	A	9142.86	0.962982	3.58169
AV63	RØ	A	8298.76	1.04298	4.48175
AV63	RØ	A	7374.93	1.06518	3.03426
AV63	RØ	A	10771.4	1.08377	2.38069
AV63	RØ	A	6023.1	1.0522	3.58917
AV63	RØ	A	9344.13	0.962191	3.39209
AV63	RØ	A	7185.82	1.01412	3.19293
AV63	RØ	A	8885.46	1.01965	3.82096
AV63	RØ	A	8817.58	1.0043	5.56413
AV63	RØ	A	5832.59	1.01405	3.03414
AV63	RØ	A	7313.25	0.988944	4.54155
AV63	RØ	A	6360.54	1.07105	3.87881
AV63	RØ	A	7993.97	0.944268	4.0224
AV63	RØ	A	6511.81	1.02057	3.8417
AV63	RØ	A	5278.49	1.04212	3.86679
AV63	RØ	A	8049.21	1.00153	3.05773
AV63	RØ	A	6580.34	1.04884	3.74192
AV63	RØ	A	4796.8	1.01524	3.46567
AV63	RØ	A	7843.71	1.0578	3.45995
AV63	RØ	A	6898.2	1.01774	4.17319
AV63	RØ	A	8747.5	1.03955	3.71605
AV63	RØ	A	6077.28	1.09866	4.69183
AV63	RØ	A	7965.22	1.15177	1.77833
AV63	RØ	A	7030.78	1.03797	3.6064
AV63	RØ	A	6054.66	0.972471	4.65407
AV63	RØ	A	6835.09	1.03863	3.9871
AV63	RØ	A	0	0.983475	2.39369
AV63	RØ	A	4141.61	1.04996	3.87979
AV63	RØ	A	6899.53	0.931155	4.61402
AV63	RØ	A	8335.7	1.01095	4.56911
AV63	RØ	A	6253.35	1.06894	3.06872
AV63	RØ	A	6125.51	0.988681	4.40817
AV63	RØ	A	7252.5	1.02729	3.05526
AV63	RØ	A	11570.7	1.0441	3.08607
AV63	RØ	A	6173.24	1.03843	3.78228
AV63	RØ	A	2664.5	0.986309	4.07738
AV63	RØ	A	5124.29	1.01227	3.74276
AV63	RØ	A	6856.84	0.984134	3.17811
AV63	RØ	A	6328.95	1.03217	4.39153
AV63	RØ	A	6053.18	1.04944	5.71025
AV63	RØ	A	9254.35	1.04607	3.1057
AV63	RØ	A	7350.73	1.06841	3.66385
AV63	RØ	A	6455.08	1.03402	5.93853
AV63	RØ	A	6540.04	1.04034	4.09955
AV63	RØ	A	17457.5	1.01886	1.80921
AV63	RØ	A	3166.26	1.05121	3.08665
AV63	RØ	A	7622.54	0.970955	3.3033
AV63	RØ	A	6815.21	0.980246	5.94405
AV63	RØ	A	9899.14	1.17068	3.97845
AV63	RØ	A	11257	1.01148	3.17636
AV63	RØ	A	4388.97	1.03349	3.47172
AV63	RØ	A	5489.89	1.03164	3.97072
AV63	RØ	A	3909.38	1.01451	4.84387
AV63	RØ	A	4783.93	1.04673	3.43739
AV63	RØ	A	6502.05	1.02927	2.8702
AV63	RØ	A	11594.5	1.05108	1.65549
AV63	RØ	A	5980.58	1.00377	5.17849
AV63	RØ	A	0	0.922325	3.21828
AV63	RØ	A	7964.77	0.975436	4.53401
AV63	RØ	A	5860.79	1.1465	2.91603
AV63	RØ	A	6714.57	0.996061	5.61099
AV63	RØ	A	7072.61	0.943477	4.41395
AV63	RØ	A	7775.08	1.02466	4.02201
AV63	RØ	A	7809.19	1.03408	4.48591
AV63	RØ	A	6593.9	0.943345	3.73958
AV63	RØ	A	7848.1	1.02479	3.01554
AV63	RØ	A	7049.01	1.00305	3.48465
AV63	RØ	A	7586.89	1.03178	3.81778
AV63	RØ	A	0	0.807932	3.0056
AV63	RØ	A	4681.67	1.00917	3.68082
AV63	RØ	A	7424.06	1.08139	2.63237
AV63	RØ	A	6470.09	0.973327	2.96121
AV63	RØ	A	4792.24	0.982882	3.59125
AV63	RØ	A	4003.19	1.08653	4.06724
AV63	RØ	A	8001.4	1.07263	4.00569
AV63	RØ	A	6066.06	0.949342	4.6018
AV63	RØ	A	16628.6	1.04133	1.60518
AV63	RØ	A	7832.11	1.02413	3.20346
AV63	RØ	A	8010.79	1.06769	2.94346
AV63	RØ	A	6774.76	1.02894	4.63216
AV63	RØ	A	4357.73	1.03309	4.22234
AV63	RØ	A	11218	0.951253	3.88902
AV63	RØ	A	8500.93	1.00357	4.58159
AV63	RØ	A	5025.26	1.01629	4.44119
AV63	RØ	A	3059.42	1.0124	3.98723
AV63	RØ	A	9050.22	0.982882	3.95668
AV63	RØ	A	9758.36	1.07204	2.62139
AV63	RØ	A	4478.91	1.04001	3.41906
AV63	RØ	A	6087.82	0.994545	3.78352
AV63	RØ	A	11608.8	1.01412	3.1187
AV63	RØ	A	7485.67	1.00166	3.47321
AV63	RØ	A	4305.01	0.99382	3.30889
AV63	RØ	A	6050.77	1.02222	3.22634
AV63	RØ	A	6493.91	1.07988	4.2159
AV63	RØ	A	1969.68	1.10663	3.72587
AV50	R20	A	522.271	0.973064	3.81121
AV50	R20	A	284.593	0.97392	2.80475
AV50	R20	A	337.851	0.899394	4.17833
AV50	R20	A	290.64	1.04034	4.20453
AV50	R20	A	0	0.881932	4.24151
AV50	R20	A	363.198	0.9614	6.28446
AV50	R20	A	278.623	0.9643	2.293
AV50	R20	A	345.91	0.925356	4.47603
AV50	R20	A	339.555	0.957249	4.24235
AV50	R20	A	2316.87	0.913363	2.88379
AV50	R20	A	419.336	0.979983	2.16749
AV50	R20	A	315.244	0.926345	6.0554
AV50	R20	A	315.928	0.922259	4.97347
AV50	R20	A	235.562	0.972537	4.86948
AV50	R20	A	418.445	0.989208	5.72436
AV50	R20	A	304.521	0.926476	4.52439
AV50	R20	A	447.387	0.915736	2.8275
AV50	R20	A	360.175	1.04766	4.64548
AV50	R20	A	340.987	1.0066	4.27167
AV50	R20	A	330.184	0.965749	3.32911
AV50	R20	A	307.414	0.986902	5.04953
AV50	R20	A	312.14	0.972009	1.64554
AV50	R20	A	363.085	1.1579	3.72203
AV50	R20	A	291.219	0.912375	3.8805
AV50	R20	A	285.619	0.990262	5.08995
AV50	R20	A	298.125	0.962718	5.07657
AV50	R20	A	1242.22	1.02499	2.43965
AV50	R20	A	334.979	0.939721	1.76885
AV50	R20	A	321.52	0.980114	4.09429
AV50	R20	A	299.331	0.966211	4.60876
AV50	R20	A	319.911	0.996983	3.70207
AV50	R20	A	294.444	0.994941	2.21448
AV50	R20	A	420.015	0.915604	4.10222
AV50	R20	A	339.603	0.995138	1.81415
AV50	R20	A	326.288	1.01148	4.98576
AV50	R20	A	379.735	1.02657	1.95227
AV50	R20	A	376.857	1.01201	5.20631
AV50	R20	A	331.968	0.954613	2.22982
AV50	R20	A	382.039	0.943016	3.93913
AV50	R20	A	294.045	0.964629	5.30147
AV50	R20	A	317.511	0.925027	2.77101
AV50	R20	A	306.325	0.97939	6.22316
AV50	R20	A	305.131	0.989142	4.71321
AV50	R20	A	341.271	1.02189	3.34613
AV50	R20	A	306.679	0.916592	6.21959
AV50	R20	A	308.644	1.0157	4.54168
AV50	R20	A	290.963	0.989076	3.87283
AV50	R20	A	273.829	0.984661	5.96674
AV50	R20	A	316.553	0.95771	4.66005
AV50	R20	A	0	0.818343	1.11689
AV50	R20	A	311.627	0.984463	3.53535
AV50	R20	A	316.054	1.14505	5.2377
AV50	R20	A	303.804	0.965156	2.53578
AV50	R20	A	356.381	0.987165	4.89496
AV50	R20	A	321.149	0.977149	3.39976
AV50	R20	A	325.795	0.937942	4.48442
AV50	R20	A	266.305	0.963575	5.98123
AV50	R20	A	322.136	0.991778	3.26307
AV50	R20	A	468.644	0.985979	1.58854
AV50	R20	A	288.839	0.972866	5.47593
AV50	R20	A	262.425	1.0157	2.78584
AV50	R20	A	305.676	0.928321	4.72875
AV50	R20	A	316.276	1.03085	3.57162
AV50	R20	A	633.976	0.902161	5.4769
AV50	R20	A	386.692	0.98901	5.86482
AV50	R20	A	0	0.804308	1.69312
AV50	R20	A	317.295	0.913166	4.72082
AV50	R20	A	343.835	0.958172	5.7237
AV50	R20	A	316.072	0.957249	6.79055
AV50	R20	A	307.724	1.01247	6.42226
AV50	R20	A	465.406	0.965025	1.79595
AV50	R20	A	309.661	0.914286	2.53266
AV50	R20	A	306.875	0.951187	4.11794
AV50	R20	A	308.331	0.974513	4.10371
AV50	R20	A	278.283	0.983343	4.02077
AV50	R20	A	282.129	0.98565	3.80113
AV50	R20	A	323.141	0.908882	4.02032
AV50	R20	A	269.755	0.968451	5.37498
AV50	R20	A	339.958	1.02677	2.21708
AV50	R20	A	309.591	0.912441	3.66106
AV50	R20	A	279.199	0.939194	4.30521
AV50	R20	A	312.189	1.10459	4.0222
AV50	R20	A	288.261	0.931484	4.57314
AV50	R20	A	245.595	0.931287	3.17428
AV50	R20	A	356.433	0.984529	4.16981
AV50	R20	A	320.258	0.984925	6.19918
AV50	R20	A	305.927	0.965947	3.79763
AV50	R20	A	321.299	0.973789	5.40267
AV50	R20	A	279.821	0.996193	1.78171
AV50	R20	A	338.221	0.937085	1.76338
AV50	R20	A	310.798	0.9614	3.99607
AV50	R20	A	389.262	0.937349	4.54922
AV50	R20	A	336.399	0.91567	2.39154
AV50	R20	A	264.902	0.922325	4.3212
AV50	R20	A	342.89	1.06578	4.55923
AV50	R20	A	279.699	0.989933	4.63788
AV50	R20	A	301.977	1.04878	4.28031
AV50	R20	A	363.069	0.957249	4.85518
AV50	R20	A	392.993	0.933395	2.20129
AV50	R20	A	487.443	0.939128	3.58956
AV50	R20	A	339.89	0.994282	4.83418
AV50	R20	A	346.281	0.976688	3.0537
AV50	R20	A	324.976	1.12917	3.9949
AV50	R20	A	322.978	0.94519	3.19455
AV50	R20	A	332.075	0.965618	4.4616
AV50	R20	A	390.247	0.924038	3.05526
AV50	R20	A	374.473	0.945783	4.65588
AV50	R20	A	332.672	0.934186	4.94572
AV50	R20	A	0	0.701776	4.45913
AV50	R20	A	417.062	0.96766	2.36912
AV50	R20	A	371.323	0.987561	4.58406
AV50	R20	A	307.111	1.00258	6.73725
AV50	R20	A	258.003	0.964959	2.19232
AV50	R20	A	324.218	0.957776	3.23336
AV50	R20	A	340.656	0.950198	3.88485
AV50	R20	A	324.571	0.995402	2.46909
AV50	R20	A	330.506	0.961466	2.51296
AV50	R20	A	358.428	0.939787	3.65592
AV50	R20	A	314.054	0.989999	2.34065
AV50	R20	A	336.535	0.915011	4.09286
AV50	R20	A	310.429	1.01978	3.4723
AV50	R20	A	278.429	0.999883	4.78901
AV50	R20	A	351.107	0.93412	3.6012
AV50	R20	A	306.885	1.08634	2.28182
AV50	R20	A	315.872	1.05392	3.42882
AV50	R20	A	319.699	0.940578	1.78262
AV50	R20	A	427.105	0.929705	4.31769
AV50	R20	A	298.48	0.957579	2.71336
AV50	R20	A	300.321	0.965684	4.88833
AV50	R20	A	314.904	0.973591	3.30876
AV50	R20	A	324.527	1.05313	4.05021
AV50	R20	A	332.912	1.07046	6.19248
AV50	R20	A	656.523	0.93814	1.71652
AV50	R20	A	348.193	0.978335	2.23606
AV50	R20	A	350.185	1.04324	4.47512
AV50	R20	A	300.193	1.03494	7.3593
AV50	R20	A	330.155	1.09688	5.76128
AV50	R20	A	334.932	0.936954	2.60806
AV50	R20	A	374.808	0.994348	4.53102
AV50	R20	A	294.109	0.929507	3.00586
AV50	R20	A	333.376	0.994414	3.64643
AV50	R20	A	367.143	0.931814	2.30529
AV50	R20	A	425.396	0.949803	1.86316
AV50	R20	A	304.152	1.17286	2.06596
AV50	R20	A	308.74	0.964959	4.81299
AV50	R20	A	309.783	0.962916	6.26652
AV50	R20	A	258.98	1.00542	4.76248
AV50	R20	A	318.081	0.931221	4.75195
AV50	R20	A	340.684	0.962718	2.46357
AV50	R20	A	552.013	1.12614	5.87795
AV50	R20	A	437.935	1.01702	2.89003
AV50	R20	A	345.953	0.944202	6.21582
AV50	R20	A	378.735	1.02591	3.92867
AV50	R20	A	341.169	0.990789	3.718
AV50	R20	A	338.123	0.961071	3.45332
AV50	R20	A	289.051	0.963048	5.30485
AV50	R20	A	278.675	0.996259	4.8776
AV50	R20	A	432.138	0.99303	2.20545
AV50	R20	A	324.75	0.968912	3.15718
AV50	R20	A	412.575	1.00555	4.96821
AV50	R20	A	500.978	1.03757	1.75311
AV50	R20	A	308.01	1.05062	6.18007
AV50	R20	A	327.333	0.903677	4.4718
AV50	R20	A	284.903	0.952505	2.1021
AV50	R20	A	289.676	0.895308	3.66385
AV50	R18	A	343.673	1.01359	2.05888
AV50	R18	A	497.315	1.07415	2.2904
AV50	R18	A	464.724	1.02143	1.87792
AV50	R18	A	409.485	0.925422	2.78064
AV50	R18	A	413.905	0.926081	4.61578
AV50	R18	A	462.327	0.906708	5.06759
AV50	R18	A	387.616	1.17437	2.48592
AV50	R18	A	496.654	0.889905	3.92197
AV50	R18	A	538.214	0.961862	6.06405
AV50	R18	A	597.168	1.00028	1.75155
AV50	R18	A	585.321	0.892079	3.58573
AV50	R18	A	278.635	0.965815	3.19072
AV50	R18	A	322.309	0.982025	2.36184
AV50	R18	A	365.846	0.992041	3.70052
AV50	R18	A	0	0.54925	1.72555
AV50	R18	A	467.179	0.863481	3.57084
AV50	R18	A	0	0.811359	3.84176
AV50	R18	A	587.847	0.957183	4.26718
AV50	R18	A	0	0.882986	3.38442
AV50	R18	A	0	0.705005	2.15326
AV50	R18	A	0	0.711463	1.99673
AV50	R18	A	473.398	0.924895	3.32163
AV50	R18	A	456.368	0.90394	3.59353
AV50	R18	A	447.738	0.975436	4.29617
AV50	R18	A	535.007	0.957974	2.40727
AV50	R18	A	549.112	0.941303	3.39033
AV50	R18	A	378.927	0.96285	3.43213
AV50	R18	A	534.642	0.954679	2.98597
AV50	R18	A	441.486	0.923643	4.43098
AV50	R18	A	498.286	0.952439	4.99811
AV50	R18	A	585.092	0.947694	3.46898
AV50	R18	A	1063.29	1.01985	5.08033
AV50	R18	A	417.393	0.938996	3.7492
AV50	R18	A	437.034	0.923116	4.78036
AV50	R18	A	652.56	0.935438	3.36017
AV50	R18	A	675.22	0.970033	2.32927
AV50	R18	A	704.664	0.899394	1.90645
AV50	R18	A	521.663	0.933593	2.92877
AV50	R18	A	428.574	0.876528	4.26875
AV50	R18	A	509.177	0.903347	2.78844
AV50	R18	A	471.549	0.918437	3.31467
AV50	R18	A	795.235	0.885754	2.18004
AV50	R18	A	390.215	0.907169	3.29336
AV50	R18	A	652.459	0.92786	1.98867
AV50	R18	A	506.904	0.919426	3.31896
AV50	R18	A	637.79	0.915736	1.91288
AV50	R18	A	380.108	0.900777	4.04697
AV50	R18	A	571.479	0.960148	4.85771
AV50	R18	A	506.175	0.964959	4.76964
AV50	R18	A	449.177	0.938074	2.60715
AV50	R18	A	568.398	0.921271	2.84278
AV50	R18	A	548.501	0.909344	3.98249
AV50	R18	A	510.049	0.961928	2.36327
AV50	R18	A	646.879	0.963509	3.69213
AV50	R18	A	574.37	1.01398	3.49707
AV50	R18	A	446.305	0.960478	3.98612
AV50	R18	A	565.428	0.926213	3.60796
AV50	R18	A	490.728	0.911782	3.70298
AV50	R18	A	519.361	0.952241	3.40002
AV50	R18	A	429.67	0.987626	3.29348
AV50	R18	A	0	0.981894	4.8945
AV50	R18	A	423.327	0.967858	4.32523
AV50	R18	A	460.788	0.904072	1.66595
AV50	R18	A	652.863	1.01827	1.75955
AV50	R18	A	459.592	0.910596	3.57162
AV50	R18	A	482.063	0.942752	2.68502
AV50	R18	A	638.635	0.843911	2.78376
AV50	R18	A	369.309	0.969967	2.44712
AV50	R18	A	450.483	0.915274	5.06876
AV50	R18	A	479.296	1.0472	2.07883
AV50	R18	A	596.711	1.02631	4.13354
AV50	R18	A	0	0.677	2.98149
AV50	R18	A	411.437	0.973723	2.49028
AV50	R18	A	442.776	0.862163	3.49973
AV50	R18	A	643.759	0.886808	3.40476
AV50	R18	A	621.897	0.971482	3.62622
AV50	R18	A	340.046	0.948419	4.5162
AV50	R18	A	390.388	1.0155	3.19598
AV50	R18	A	0	0.739797	3.25689
AV50	R18	A	0	0.842197	1.99856
AV50	R18	A	0	0.832643	3.69382
AV50	R18	A	0	0.561138	2.34182
AV50	R18	A	458.412	0.94809	4.61253
AV50	R18	A	463.947	0.958172	2.69002
AV50	R18	A	451.181	0.962718	3.47146
AV50	R18	A	0	0.619263	2.75561
AV50	R18	A	479.152	0.99817	3.20716
AV50	R18	A	554.596	0.934977	3.15334
AV50	R18	A	443.82	0.929507	3.02477
AV50	R18	A	416.442	0.907235	4.79174
AV50	R18	A	920.804	1.07619	2.07025
AV50	R18	A	447.453	0.891948	3.54958
AV50	R18	A	0	0.781377	2.28351
AV50	R18	A	0	0.834422	3.60633
AV50	R18	A	346.61	0.907301	2.81671
AV50	R18	A	403.328	0.923116	1.92335
AV50	R18	A	861.97	0.995666	4.27596
AV50	R18	A	307.624	0.917778	2.2633
AV50	R18	A	0	0.814456	4.19386
AV50	R18	A	711.417	0.898998	2.97485
AV50	R18	A	612.442	0.872113	5.27189
AV50	R18	A	0	0.611955	2.14448
AV50	R18	A	448.521	0.889444	3.11382
AV50	R18	A	533.679	0.89175	3.36797
AV50	R18	A	561.516	0.941105	2.12101
AV50	R18	A	542.831	0.944597	5.41983
AV50	R18	A	451.452	1.03316	3.70858
AV50	R18	A	528.271	0.957249	2.54371
AV50	R18	A	427.312	0.97794	2.69158
AV50	R18	A	342.536	0.889312	2.29379
AV50	R18	A	387.214	0.930166	4.9519
AV50	R18	A	737.726	0.908751	3.90468
AV50	R18	A	497.374	0.905917	3.89246
AV50	R18	A	458.858	0.961664	3.60061
AV50	R18	A	609.136	1.03448	2.39954
AV50	R18	A	385.307	1.08772	4.51074
AV50	R18	A	446.099	0.959687	1.83482
AV50	R18	A	461.429	0.86559	2.52168
AV50	R18	A	402.666	0.970889	5.1612
AV50	R18	A	647.908	0.972932	2.19577
AV50	R18	A	562.363	0.919623	2.48404
AV50	R18	A	468.31	0.886347	3.20437
AV50	R18	A	463.775	0.94776	5.36588
AV50	R18	A	390.51	0.923116	1.76326
AV50	R18	A	496.962	0.972734	3.37669
AV50	R18	A	622.773	0.887994	2.01097
AV50	R18	A	0	0.757721	2.14903
AV50	R18	A	452.441	0.941237	2.42229
AV50	R18	A	0	0.873695	3.62668
AV50	R18	A	473.357	0.851291	1.71191
AV50	R18	A	540.976	1.00904	3.29804
AV50	R18	A	373.731	0.890366	3.16719
AV50	R18	A	490.138	0.912045	4.1173
AV50	R18	A	0	0.844569	3.22842
AV50	R18	A	580.51	0.890432	3.50136
AV50	R18	A	526.21	0.908948	4.02695
AV50	R18	A	473.189	0.937283	4.40785
AV50	R18	A	579.522	0.958633	2.32453
AV50	R18	A	429.1	0.908026	4.39433
AV50	R18	A	477.006	0.92529	3.7763
AV50	R18	A	483.597	0.951648	3.32052
AV50	R18	A	454.589	0.917185	3.88544
AV50	R18	A	528.35	0.941171	3.00456
AV50	R18	A	447.263	0.89544	6.08335
AV50	R18	A	640.054	0.906774	3.02484
AV50	R18	A	418.915	1.00753	3.88063
AV50	R18	A	514.105	0.954811	3.73386
AV50	R18	A	602.257	0.935636	3.45488
AV50	R18	A	461.411	1.00878	4.12074
AV50	R18	A	567.26	0.899525	4.88988
AV50	R18	A	619.04	0.933791	2.81196
AV50	R18	A	479.212	0.996061	3.34431
AV50	R18	A	467.027	0.944466	3.38793
AV50	R18	A	438.408	1.02782	3.50779
AV50	R18	A	321.951	0.974382	2.2024
AV50	R18	A	422.598	0.989208	5.08534
AV50	R18	A	483.825	0.968649	2.84921
AV50	R18	A	415.508	0.944993	2.6065
AV50	R18	A	419.643	0.990658	3.4175
AV50	R18	A	0	0.932143	2.85714
AV50	R18	A	558.498	0.923906	3.19326
AV50	R18	A	450.494	1.02492	2.80144
AV50	R18	A	1968.26	1.17813	2.11906
AV50	R18	A	566.5	0.878571	3.82902
AV50	R18	A	474.709	1.02413	3.69447
AV50	R18	A	763.708	0.910069	3.38169
AV50	R18	A	595.829	1.08647	2.04614
AV50	R18	A	541.377	0.997313	5.03139
AV50	R18	A	608.301	0.92417	4.68591
AV50	R18	A	636.775	0.950132	2.73234
AV50	R18	A	508.007	0.944729	2.56334
AV50	R18	A	421.55	0.910003	5.27293
AV50	R18	A	381.807	0.901568	3.03667
AV50	R18	A	322.723	0.93267	2.68411
AV50	R18	A	562.991	1.02426	2.75489
AV50	R18	A	701.566	0.910991	4.12399
AV50	R18	A	451.653	1.01576	3.52462
AV50	R18	A	488.479	0.964366	4.82118
AV50	R18	A	791.85	0.997445	3.27522
AV50	R18	A	475.722	0.886083	3.27613
AV50	R18	A	389.21	0.987824	4.64854
AV50	R18	A	536.904	0.982553	4.53869
AV50	R18	A	473.002	0.993886	2.66747
AV50	R18	A	432.464	0.97761	3.56493
AV50	R18	A	588.905	0.985913	2.23847
AV50	R18	A	443.911	1.00232	5.31199
AV50	R18	A	445.239	1.13734	2.94242
AV50	R18	A	497.35	0.950132	2.64264
AV50	R18	A	508.922	0.89432	6.49409
AV50	R18	A	469.365	0.958237	4.73616
AV50	R18	A	510.374	0.95547	5.34937
AV50	R18	A	408.156	0.998697	4.80487
AV50	R18	A	413.412	0.922391	5.57778
AV50	R18	A	445.302	0.958633	5.7081
AV50	R18	A	461.76	0.952373	3.58338
AV50	R18	A	767.641	1.18445	4.74396
AV50	R18	A	466.936	0.883381	6.9706
AV50	R18	A	584.211	0.961466	4.95697
AV50	R18	A	742.664	1.02255	1.77249
AV50	R18	A	390.864	0.920744	3.02426
AV50	R18	A	514.081	1.11408	5.24017
AV50	R18	A	451.665	0.836662	5.0568
AV50	R18	A	412.655	0.933198	2.73384
AV50	R18	A	335.576	0.877319	3.62525
AV50	R18	A	755.41	1.01174	1.96086
AV50	R18	A	566.568	0.970757	3.65397
AV50	R18	A	711.623	0.975699	3.09328
AV50	R18	A	488.913	0.920678	2.72857
AV50	R18	A	459.826	0.895835	3.48264
AV50	R18	A	610.05	0.987429	2.98818
AV50	R18	A	371.549	0.944268	4.08291
AV50	R18	A	591.628	0.919755	4.32094
AV50	R18	A	471.057	0.919953	4.56664
AV50	R18	A	525.338	1.0779	2.61852
AV50	R18	A	480.34	0.912902	1.86511
AV50	R18	A	771.089	0.970626	2.74021
AV50	R18	A	671.136	1.0041	2.84076
AV50	R18	A	462.471	0.942686	2.04289
AV50	R18	A	417.003	0.953295	3.94498
AV50	R18	A	1050.83	0.942423	4.26523
AV50	R18	A	421.659	0.94809	3.32059
AV50	R18	A	445.671	0.935504	4.1275
AV50	R18	A	458.728	0.966277	2.97219
AV50	R18	A	556.146	0.912309	5.40176
AV50	R18	A	442.119	0.918635	4.76131
AV50	R18	A	398.069	0.924038	2.96881
AV50	R18	A	436.511	0.911386	3.92386
AV50	R18	A	519.669	0.962191	1.92738
AV50	R18	A	0	0.950067	3.74082
AV50	R18	A	490.035	0.93445	3.62941
AV50	R18	A	0	0.917646	3.94017
AV50	R18	A	0	0.826646	4.93759
AV50	R18	A	442.455	0.969967	2.77732
AV50	R18	A	422.992	0.952109	1.96261
AV50	R18	A	377.675	0.923841	2.94359
AV50	R18	A	459.223	0.953164	3.23713
AV50	R18	A	389.934	0.925422	4.17196
AV50	R18	A	448.573	0.989274	2.47241
AV50	R18	A	351.439	0.881536	4.57197
AV50	R18	A	865.157	0.974052	5.52825
AV50	R18	A	340.303	0.9842	2.55066
AV50	R18	A	481.396	0.904138	4.36547
AV50	R18	A	399.299	0.89801	2.91622
AV50	R18	A	369.952	0.949935	4.31126
AV50	R18	A	471.792	0.947826	1.86524
AV50	R18	A	384.928	0.935965	5.01267
AV50	R18	A	307.651	0.862097	2.54488
AV50	R18	A	434.568	0.890432	4.85271
AV50	R18	A	480.397	0.883315	3.25501
AV50	R18	A	282.621	1.08574	4.85881
AV50	R18	A	391.891	1.08752	3.10375
AV50	R18	A	592.475	0.93524	3.14021
AV50	R18	A	338.293	0.965288	5.53273
AV50	R18	A	437.151	0.930562	3.62993
AV50	R18	A	358.271	1.0271	4.13062
AV50	R18	A	399.056	0.959489	4.55786
AV50	R18	A	462.358	0.941566	4.08174
AV50	R18	A	444.146	0.917119	3.29582
AV50	R18	A	317.235	0.930364	3.12812
AV50	R18	A	463.511	0.931814	2.37237
AV50	R18	A	418.187	0.948419	3.86457
AV50	R18	A	442.683	0.875606	3.89317
AV50	R18	A	536.09	1.03533	4.33017
AV50	R18	A	354.711	0.967331	3.75557
AV50	R18	A	510.026	0.953032	2.41826
AV50	R18	A	643.086	1.00028	2.64413
AV50	R18	A	462.826	0.9956	1.90782
AV50	R18	A	0	0.890366	2.77966
AV50	R18	A	562.615	0.965288	3.07872
AV50	R18	A	616.34	0.949671	4.19426
AV50	R18	A	408.54	1.0555	3.04844
AV50	R18	A	539.867	0.903479	2.90277
AV50	R18	A	623.09	0.942752	4.13881
AV50	R18	A	523.596	0.911584	4.75507
AV50	R18	A	0	0.824538	3.17193
AV50	R18	A	0	0.863086	4.1392
AV50	R18	A	453.944	0.948287	4.67356
AV50	R18	A	571.634	0.927794	4.12464
AV50	R18	A	412.562	1.01734	3.88024
AV50	R18	A	592.244	1.03711	4.60544
AV50	R18	A	485.768	0.942027	2.09072
AV50	R18	A	416.121	0.920085	2.5599
AV50	R18	A	441.668	0.985847	3.65183
AV50	R18	A	0	0.660856	2.84746
AV50	R18	A	506.965	0.954613	2.28625
AV50	R18	A	542.312	0.923445	2.94093
AV50	R18	A	648.229	0.976886	2.88125
AV50	R18	A	393.287	0.878176	4.59037
AV50	R18	A	463.397	1.00338	4.329
AV50	R18	A	491.8	0.987429	5.89654
AV50	R18	A	448.873	0.940973	4.69241
AV50	R18	A	472.574	0.976951	2.23353
AV50	R18	A	467.45	0.961928	1.88435
AV50	R18	A	717.38	0.885358	3.34756
AV50	R18	A	440.713	0.920678	3.65124
AV50	R18	A	422.089	0.9216	2.81268
AV50	R18	A	461.833	1.1318	3.91332
AV50	R18	A	497.085	1.02486	2.6635
AV50	R18	A	470.2	0.886874	3.56987
AV50	R18	A	483.308	0.868423	2.26525
AV50	R18	A	463.601	0.960939	2.04951
AV50	R18	A	406.211	0.932605	3.74569
AV50	R18	A	607.428	1.23486	4.20446
AV50	R18	A	0	0.751197	3.34743
AV50	R18	A	593.87	0.910464	3.4424
AV50	R18	A	463.798	0.932934	3.17155
AV50	R18	A	398.627	1.01484	3.4998
AV50	R18	A	734.712	0.90539	3.15699
AV50	R18	A	440.675	1.00074	3.42596
AV50	R18	A	283.737	1.01062	2.59389
AV50	R18	A	421.186	0.86045	3.72729
AV50	R18	A	426.819	0.924368	2.97284
AV50	R18	A	484.713	0.946574	4.04385
AV50	R18	A	692.397	0.983739	3.88089
AV50	R18	A	427.233	0.923379	2.51608
AV50	R18	A	508.409	0.904006	2.98109
AV50	R18	A	483.19	0.909014	3.08003
AV50	R18	A	720.484	0.941566	1.93407
AV50	R18	A	580.827	0.968583	2.42924
AV50	R18	A	497.371	0.953559	5.36185
AV50	R18	A	317.934	0.978665	4.86571
AV50	R18	A	449.108	0.875276	3.10888
AV50	R18	A	462.275	0.89689	2.7599
AV50	R18	A	414.648	0.892672	2.97564
AV50	R18	A	445.441	0.98163	2.93878
AV50	R18	A	444.115	0.919755	4.26179
AV50	R18	A	383.78	0.946113	3.91527
AV50	R18	A	0	0.862888	2.73871
AV50	R18	A	0	0.647697	1.92751
AV50	R18	A	484.901	0.927069	1.8904
AV50	R18	A	473.401	0.967001	3.71657
AV50	R18	A	717.635	0.918108	2.9707
AV50	R18	A	420.754	0.949605	3.94615
AV50	R18	A	314.638	0.975634	4.98017
AV50	R18	A	636.892	1.04733	4.86076
AV50	R18	A	671.577	0.952373	4.14537
AV50	R18	A	713.325	1.0984	6.41946
AV50	R18	A	470.412	1.00884	4.02733
AV50	R18	A	471.598	0.995336	4.13972
AV50	R18	A	591.546	0.901436	4.60005
AV50	R18	A	534.253	0.981498	4.20855
AV50	R18	A	388.12	0.886676	4.61766
AV50	R18	A	334.507	0.927399	1.53004
AV50	R18	A	515.176	0.906247	3.96955
AV50	R18	A	277.805	0.923775	2.4726
AV50	R18	A	528.042	0.979455	5.55159
AV50	R18	A	424.968	0.989933	5.21814
AV50	R18	A	519.786	0.917053	5.35457
AV50	R18	A	394.118	0.911321	2.40013
AV50	R18	A	362.271	0.925356	5.43523
AV50	R18	A	532.773	1.01484	4.37632
AV50	R18	A	535.893	1.02683	4.55903
AV50	R18	A	405.222	0.948485	3.21237
AV50	R18	A	447.832	1.00931	4.11528
AV50	R18	A	575.339	0.908553	3.75772
AV50	R18	A	426.906	1.00476	5.22743
AV50	R18	A	564.232	0.918108	3.11565
AV50	R18	A	768.032	0.953098	2.37373
AV50	R18	A	537.932	0.969703	2.48436
AV50	R18	A	403.409	0.897746	5.25434
AV50	R18	A	0	0.858012	1.53016
AV50	R18	A	400.389	0.964497	5.71051
AV50	R18	A	429.109	1.00858	5.84376
AV50	R18	A	507.631	0.929046	3.27854
AV50	R18	A	389.462	1.05853	4.27167
AV50	R18	A	548.553	0.896626	4.44203
AV50	R18	A	559.266	0.952834	3.90682
AV50	R18	A	353.796	0.93155	3.82701
AV50	R18	A	438.635	0.930035	4.53856
AV50	R18	A	521.731	0.950001	3.93328
AV50	R18	A	588.076	0.944531	6.9849
AV50	R18	A	450.407	0.990723	3.75862
AV50	R18	A	388.546	0.994809	4.89574
AV50	R18	A	406.059	0.93043	3.66678
AV50	R18	A	551.279	0.91791	4.32139
AV50	R18	A	543.996	0.945322	1.75604
AV50	R18	A	612.183	0.946311	3.52937
AV50	R18	A	606.162	0.998697	2.27279
AV50	R18	A	656.87	0.978006	3.51949
AV50	R18	A	0	0.684051	2.4635
AV50	R18	A	301.523	1.01761	3.54172
AV50	R18	A	748.114	0.865326	4.74285
AV50	R18	A	427.584	0.965025	3.11844
AV50	R18	A	395.894	0.933066	5.90304
AV50	R18	A	490.174	0.931023	2.72552
AV50	R18	A	0	0.579805	2.74566
AV50	R18	A	0	0.927465	4.35838
AV50	R18	A	496.19	0.963707	2.56919
AV50	R18	A	372.923	0.901964	4.94494
[truncated: 9,209 more rows]

## Sheet: Fig1C_PBP1b
Strain	Guide	Replicate	GFP fluorescence	Diameter (μm)	Length (μm)
AV58	GØ	A	3844.75	0.919582	3.79262
AV58	GØ	A	1675.4	0.999743	3.58254
AV58	GØ	A	3475.74	1.04533	2.9629
AV58	GØ	A	3326.12	1.02801	3.66009
AV58	GØ	A	3097.25	1.05836	3.36245
AV58	GØ	A	4155.1	1.02208	3.46379
AV58	GØ	A	2576.2	1.00513	4.21493
AV58	GØ	A	2999.11	1.00543	3.60146
AV58	GØ	A	4245.91	0.972268	4.07348
AV58	GØ	A	2673.12	0.959662	3.43545
AV58	GØ	A	4129.23	0.989891	3.97494
AV58	GØ	A	2659.95	0.885499	2.33194
AV58	GØ	A	2614.27	0.976306	2.907
AV58	GØ	A	2462.62	0.929801	3.04486
AV58	GØ	A	2946.88	0.97343	3.83116
AV58	GØ	A	1934.6	0.978448	2.28625
AV58	GØ	A	2196.94	1.07899	3.21705
AV58	GØ	A	0	0.916645	3.11844
AV58	GØ	A	2269.11	0.978509	4.02799
AV58	GØ	A	3502.68	0.991849	2.58648
AV58	GØ	A	3089.15	0.968229	4.10156
AV58	GØ	A	2630.66	1.03138	3.3005
AV58	GØ	A	3627.12	1.01834	3.20021
AV58	GØ	A	2580.29	0.97906	3.81719
AV58	GØ	A	2766.79	0.958561	2.90797
AV58	GØ	A	2826.13	0.958928	5.55841
AV58	GØ	A	2454.57	1.02257	4.4915
AV58	GØ	A	2888.29	1.00562	3.09614
AV58	GØ	A	2988.52	0.956786	2.96121
AV58	GØ	A	2781.35	1.03077	3.47431
AV58	GØ	A	2623.21	1.04998	3.684
AV58	GØ	A	2811.08	0.96364	2.17529
AV58	GØ	A	2458.85	0.999987	4.1938
AV58	GØ	A	2558.26	1.06136	3.2526
AV58	GØ	A	2318.7	0.953176	3.45267
AV58	GØ	A	2320.55	0.90508	2.92286
AV58	GØ	A	2310.24	1.01938	3.37766
AV58	GØ	A	2199.29	0.945711	3.72743
AV58	GØ	A	2814.01	0.961926	2.85941
AV58	GØ	A	1760.94	0.965843	3.67796
AV58	GØ	A	1870.98	1.00831	3.13248
AV58	GØ	A	2297.59	0.992522	3.58
AV58	GØ	A	2878.06	1.01229	3.2734
AV58	GØ	A	4866.81	1.04099	3.79652
AV58	GØ	A	3131.04	0.986158	4.21928
AV58	GØ	A	3247.85	1.00966	3.02413
AV58	GØ	A	3310.25	1.05616	3.22783
AV58	GØ	A	1169.42	0.998152	3.36836
AV58	GØ	A	2789.61	1.0148	3.19429
AV58	GØ	A	3209.37	0.954583	3.52567
AV58	GØ	A	3231.3	1.00959	3.66951
AV58	GØ	A	3254.26	0.985852	2.71388
AV58	GØ	A	3037.42	1.04704	3.23069
AV58	GØ	A	2716.48	1.00005	3.42615
AV58	GØ	A	3190.24	1.05004	3.09582
AV58	GØ	A	2884.67	0.93384	3.38214
AV58	GØ	A	3599.69	0.944976	2.48631
AV58	GØ	A	2338.33	0.888007	2.50894
AV58	GØ	A	0	0.80081	2.91181
AV58	GØ	A	3052.03	0.913952	2.85188
AV58	GØ	A	3335.53	0.900674	3.30031
AV58	GØ	A	2252.36	0.967801	3.63701
AV58	GØ	A	2537.27	1.0173	3.29413
AV58	GØ	A	2912.39	1.06387	4.3381
AV58	GØ	A	2172.71	0.998274	3.48491
AV58	GØ	A	3450.33	0.985301	3.47418
AV58	GØ	A	2416.18	0.912912	4.45477
AV58	GØ	A	2421.35	0.954951	3.61992
AV58	GØ	A	2834.8	1.11344	3.31766
AV58	GØ	A	3295.21	0.99552	3.58117
AV58	GØ	A	3604.28	0.991604	3.55992
AV58	GØ	A	2316.73	0.989218	3.13196
AV58	GØ	A	4194.97	0.912851	3.65137
AV58	GØ	A	2668.25	0.963089	2.99111
AV58	GØ	A	3896.71	1.02459	4.20797
AV58	GØ	A	1501.31	1.0222	3.21997
AV58	GØ	A	2768.18	1.01204	3.61166
AV58	GØ	A	4093.57	0.95801	4.37535
AV58	GØ	A	3074.82	0.998886	3.69219
AV58	GØ	A	3054.99	0.985975	3.12325
AV58	GØ	A	2972.03	0.993929	4.44672
AV58	GØ	A	0	0.927476	3.3891
AV58	GØ	A	3280.61	1.00035	3.89493
AV58	GØ	A	3090.9	0.994541	3.67659
AV58	GØ	A	3023.13	1.00011	3.52131
AV58	GØ	A	2481.88	0.968474	4.2315
AV58	GØ	A	2866.34	0.985913	3.11565
AV58	GØ	A	2276.74	0.957827	3.59645
AV58	GØ	A	2451.49	0.975756	3.13878
AV58	GØ	A	2105.64	1.04203	3.39534
AV58	GØ	A	2882.73	0.933901	2.93098
AV58	GØ	A	3206.61	0.983955	3.66269
AV58	GØ	A	2087.75	0.988606	3.16791
AV58	GØ	A	1477.67	0.971962	3.11591
AV58	GØ	A	2599.1	0.995092	3.16556
AV58	GØ	A	3164.8	1.01002	3.16206
AV58	GØ	A	3383.58	1.08009	3.80211
AV58	GØ	A	3376.6	0.944609	2.40747
AV58	GØ	A	2748.62	1.04435	3.00359
AV58	GØ	A	3474.55	0.962538	2.97187
AV58	GØ	A	3641.23	0.983343	3.22894
AV58	GØ	A	3054.41	1.01926	3.1837
AV58	GØ	A	4279.71	0.972818	2.9289
AV58	GØ	A	3346.03	0.959662	4.23742
AV58	GØ	A	2863.85	1.07121	2.98759
AV58	GØ	A	2669.84	0.917746	3.59541
AV58	GØ	A	3154.64	0.983955	3.24058
AV58	GØ	A	3459.37	1.01223	3.4751
AV58	GØ	A	3446.71	1.01522	3.24246
AV58	GØ	A	2431.9	1.02116	3.45456
AV58	GØ	A	3127.77	1.01865	3.25182
AV58	GØ	A	2650	1.02128	3.36908
AV58	GØ	A	2954.23	0.953482	4.26549
AV58	GØ	A	0	0.932799	3.74257
AV58	GØ	A	0	0.898838	3.19053
AV58	GØ	A	2793.67	0.974042	3.63792
AV58	GØ	A	2790.98	0.979917	2.54605
AV58	GØ	A	2441.01	0.968107	3.63532
AV58	GØ	A	2314.49	1.03909	2.63776
AV58	GØ	A	2229.71	0.980896	3.90013
AV58	GØ	A	2259.6	0.950667	3.37785
AV58	GØ	A	2125.14	1.0982	3.63064
AV58	GØ	A	2952.58	1.01608	3.64286
AV58	GØ	A	1578.92	1.01828	3.66398
AV58	GØ	A	2865.19	0.959846	3.49187
AV58	GØ	A	0	0.916828	3.7624
AV58	GØ	A	3039.91	1.02196	2.85851
AV58	GØ	A	0	0.952319	4.04566
AV58	GØ	A	3249.96	0.961315	3.56772
AV58	GØ	A	2770.63	0.986342	3.15744
AV58	GØ	A	3140.54	0.981324	3.15588
AV58	GØ	A	4022.44	0.985546	3.21444
AV58	GØ	A	3808.42	0.934146	3.95551
AV58	GØ	A	2561.94	0.994297	3.32091
AV58	GØ	A	3237.94	0.990747	2.86234
AV58	GØ	A	3301.34	0.995031	3.03498
AV58	GØ	A	3403.48	0.955624	2.96127
AV58	GØ	A	2572.75	0.975205	2.72174
AV58	GØ	A	3401.89	0.966822	4.08258
AV58	GØ	A	3769.91	0.944609	3.46574
AV58	GØ	A	2523.6	0.978509	3.33138
AV58	GØ	A	3599.79	1.03854	3.50064
AV58	GØ	A	3076.58	1.04374	3.1757
AV58	GØ	A	0	0.970371	2.9848
AV58	GØ	A	0	0.961559	2.87749
AV58	GØ	A	0	0.921846	3.04948
AV58	GØ	A	2396.54	0.968168	2.79214
AV58	GØ	A	3503.13	1.02189	3.26664
AV58	GØ	A	3117.96	0.945772	3.78469
AV58	GØ	A	0	0.79518	3.71774
AV58	GØ	A	2874.22	1.04392	3.54933
AV58	GØ	A	2182.94	1.01945	4.45191
AV58	GØ	A	3211.24	0.974532	3.41399
AV58	GØ	A	4084.12	1.06516	3.85593
AV58	GØ	A	3182.99	0.989707	3.4045
AV58	GØ	A	2870.71	1.03817	3.54322
AV58	GØ	A	2402.82	1.02801	4.00257
AV58	GØ	A	2387.21	0.950117	3.2918
AV58	GØ	A	2355.64	0.984445	4.31619
AV58	GØ	A	0	0.844256	3.37961
AV58	GØ	A	2069.69	0.994786	3.67874
AV58	GØ	A	2365.33	1.01779	3.84313
AV58	GØ	A	2561.94	0.946567	3.5802
AV58	GØ	A	2681.19	0.99907	2.8836
AV58	GØ	A	2295.58	1.01798	3.14242
AV58	GØ	A	2596.21	0.941183	3.86094
AV58	GØ	A	0	0.72738	3.0173
AV58	GØ	A	0	0.767828	3.24818
AV58	GØ	A	2834.32	0.941978	4.49176
AV58	GØ	A	2324.41	0.944548	3.41777
AV58	GØ	A	2702.22	0.937572	4.22117
AV58	GØ	A	3326.27	0.958928	2.71186
AV58	GØ	A	2683.33	1.00843	3.51546
AV58	GØ	A	2459.43	1.00005	2.6561
AV58	GØ	A	2630.49	0.906732	3.63233
AV58	GØ	A	2304.51	0.97496	3.8816
AV58	GØ	A	2079.89	0.984078	3.34828
AV58	GØ	A	3011.49	0.902999	4.82034
AV58	GØ	A	2866.67	0.98163	2.54566
AV58	GØ	A	2180.85	1.00329	3.46001
AV58	GØ	A	2257.75	0.942712	3.51468
AV58	GØ	A	2138.52	0.989218	3.99341
AV58	GØ	A	2438.41	0.998213	3.02029
AV58	GØ	A	1260.4	1.11227	2.89841
AV58	GØ	A	2558.87	0.945711	3.2112
AV58	GØ	A	1953.69	0.932493	2.84278
AV58	GØ	A	3709.69	0.997479	3.16537
AV58	GØ	A	3354.61	0.953666	4.47766
AV58	GØ	A	3875.16	0.918725	3.45144
AV58	GØ	A	2759.31	1.02887	3.12689
AV58	GØ	A	2371.15	0.960029	2.64407
AV58	GØ	A	2850.63	1.00678	3.76233
AV58	GØ	A	0	0.970799	4.2276
AV58	GØ	A	2576.77	1.09967	3.39729
AV58	GØ	A	2977.18	0.908384	2.71713
AV58	GØ	A	3793.29	0.939041	2.53312
AV58	GØ	A	2326.76	0.978509	3.56649
AV58	GØ	A	2877.43	0.978632	3.72899
AV58	GØ	A	2627.18	1.04068	4.00289
AV58	GØ	A	2492.69	0.964741	4.2508
AV58	GØ	A	4088.84	1.10811	2.15943
AV58	GØ	A	2966.59	0.977041	4.09494
AV58	GØ	A	3687	0.984322	3.95064
AV58	GØ	A	2944.7	1.08229	3.36759
AV58	GØ	A	3994.73	1.0419	3.19995
AV58	GØ	A	3740.58	0.994297	4.14817
AV58	GØ	A	2729.45	1.03052	3.24701
AV58	GØ	A	3005.14	1.04478	4.25354
AV58	GØ	A	2662.25	1.02306	3.17369
AV58	GØ	A	2907.68	1.014	4.05561
AV58	GØ	A	2571.38	0.978938	3.49096
AV58	GØ	A	2265.78	0.948893	3.67367
AV58	GØ	A	2752.83	0.969392	3.64773
AV58	GØ	A	2299.16	1.03334	4.5953
AV58	GØ	A	1781.91	1.03321	3.44767
AV58	GØ	A	0	0.955134	2.22788
AV58	GØ	A	0	0.926925	2.9629
AV58	GØ	A	3013.22	0.945527	3.18038
AV58	GØ	A	1708.55	0.989095	3.01009
AV58	GØ	A	2508.8	1.01302	3.13853
AV58	GØ	A	2849.05	0.96315	4.16617
AV58	GØ	A	1608.95	1.0189	3.54393
AV58	GØ	A	3907.61	0.994603	3.21211
AV58	GØ	A	2907.63	0.97906	3.29017
AV58	GØ	A	3096.88	1.0274	4.79303
AV58	GØ	A	4062.23	0.976857	2.64342
AV58	GØ	A	2997.75	1.00097	2.75977
AV58	GØ	A	2245.6	0.979366	3.43831
AV58	GØ	A	3320.59	0.966822	4.32594
AV58	GØ	A	3655.94	0.990564	2.92877
AV58	GØ	A	2588.95	0.933289	4.19237
AV58	GØ	A	2986.8	0.959601	3.49342
AV58	GØ	A	3774.7	0.963885	3.04174
AV58	GØ	A	4105.1	1.06785	3.23219
AV58	GØ	A	3473.35	1.05096	3.19989
AV58	GØ	A	2605.6	0.998947	3.03296
AV58	GØ	A	0	0.989952	3.6675
AV58	GØ	A	2706.61	0.952197	3.18942
AV58	GØ	A	2273.17	1.01473	4.19438
AV58	GØ	A	1773.09	1.02514	3.93777
AV58	GØ	A	2036.49	0.957337	3.98684
AV58	GØ	A	1867.47	0.966455	3.07977
AV58	GØ	A	2461.69	0.994909	3.48679
AV58	GØ	A	2910.99	0.990074	3.04668
AV58	GØ	A	2731.84	0.998458	3.03056
AV58	GØ	A	3066.84	1.01914	3.5113
AV58	GØ	A	2267.76	1.06546	3.12487
AV58	GØ	A	2508.18	0.965108	4.51185
AV58	GØ	A	3213.71	1.02043	4.16162
AV58	GØ	A	2654.34	0.999926	3.22582
AV58	GØ	A	2634.26	0.98983	3.69642
AV58	GØ	A	3306.48	1.01681	2.41124
AV58	GØ	A	2694.52	0.956113	3.47991
AV58	GØ	A	3129.39	0.975083	3.34113
AV58	GØ	A	2527.96	0.966332	3.44461
AV58	GØ	A	3293	0.952319	3.5633
AV58	GØ	A	3178.19	1.02263	3.35491
AV58	GØ	A	2873.37	1.02287	4.19406
AV58	GØ	A	2413.85	0.953972	3.58598
AV58	GØ	A	2235.82	0.995459	3.09647
AV58	GØ	A	1978.37	0.994909	3.37428
AV58	GØ	A	2688.93	1.06962	4.00244
AV58	GØ	A	2263.03	1.01859	3.23596
AV58	GØ	A	2568.81	0.994235	3.92424
AV58	GØ	A	3109.07	0.999437	3.78144
AV58	GØ	A	3063.85	1.06503	4.00056
AV58	GØ	A	3556.61	0.936104	3.60263
AV58	GØ	A	2849.4	1.02997	3.38208
AV58	GØ	A	3663.94	1.0662	3.58228
AV58	GØ	A	2943.62	0.91279	4.05567
AV58	GØ	A	2842.98	0.977836	4.30404
AV58	GØ	A	3009.4	1.01284	3.41373
AV58	GØ	A	4183	0.951157	4.27928
AV58	GØ	A	3333.74	0.985485	3.22192
AV58	GØ	A	3566.49	1.05065	3.30661
AV58	GØ	A	3490.53	0.972451	4.08648
AV58	GØ	A	2916.57	0.998152	3.00411
AV58	GØ	A	3194.18	0.976979	3.36498
AV58	GØ	A	2340.84	1.08498	3.98106
AV58	GØ	A	4190.72	0.952809	3.31734
AV58	GØ	A	2727.95	0.948709	4.11697
AV58	GØ	A	2398.2	0.98934	3.99464
AV58	GØ	A	2873.05	0.985424	4.00666
AV58	GØ	A	0	0.75871	3.4773
AV58	GØ	A	3289.54	0.912178	3.51708
AV58	GØ	A	2514.91	0.930291	5.6212
AV58	GØ	A	2598.35	1.00439	3.59066
AV58	GØ	A	3683.31	1.01198	3.98326
AV58	GØ	A	2762.74	1.00311	3.06806
AV58	GØ	A	2239.7	0.911994	3.8142
AV58	GØ	A	3061.94	0.97857	2.72896
AV58	GØ	A	2460.61	0.951891	2.70296
AV58	GØ	A	2191.91	1.0091	3.43207
AV58	GØ	A	3163.85	1.04154	2.72422
AV58	GØ	A	2427.33	0.958867	3.81966
AV58	GØ	A	2049.79	0.991849	3.32221
AV58	GØ	A	2118.18	0.991543	3.23122
AV58	GØ	A	2925	0.966393	3.02061
AV58	GØ	A	2972.54	1.0006	3.57598
AV58	GØ	A	3144.47	1.03113	2.77673
AV58	GØ	A	3842.96	1.03432	2.39857
AV58	GØ	A	3270.55	1.11656	3.03661
AV58	GØ	A	3108.44	1.0091	3.03634
AV58	GØ	A	4223.7	0.982364	3.52885
AV58	GØ	A	3169.6	1.00806	3.35049
AV58	GØ	A	3107.67	1.01571	3.53477
AV58	GØ	A	4418.61	1.00598	2.39733
AV58	GØ	A	3501.91	1.03829	3.18526
AV58	GØ	A	2719.05	1.03107	3.63883
AV58	GØ	A	3695.16	0.997662	3.47451
AV58	GØ	A	0	0.989524	3.22101
AV58	GØ	A	0	0.953604	3.3607
AV58	GØ	A	2766.19	1.00537	2.85889
AV58	GØ	A	3287.86	1.061	2.98694
AV58	GØ	A	2904.98	0.960703	3.3657
AV58	GØ	A	2885.77	1.03009	2.93417
AV58	GØ	A	3331.55	1.02312	5.1792
AV58	GØ	A	3997.77	0.986036	3.52612
AV58	GØ	A	2966.44	1.02881	4.22344
AV58	GØ	A	2928.18	0.979978	3.57071
AV58	GØ	A	3685.83	0.980896	3.48998
AV58	GØ	A	2833.73	1.02293	3.5529
AV58	GØ	A	2396.47	1.01112	3.31129
AV58	GØ	A	0	1.17414	1.63397
AV58	GØ	A	0	0.737844	1.62799
AV58	GØ	A	3082.99	0.969514	3.40204
AV58	GØ	A	2903.17	1.03811	3.55979
AV58	GØ	A	3873.1	0.95954	3.17265
AV58	GØ	A	2443.31	0.974348	2.85233
AV58	GØ	A	2526.5	0.991482	3.93549
AV58	GØ	A	3026.08	0.966699	5.64824
AV58	GØ	A	2990.55	1.00782	3.29927
AV58	GØ	A	2616.49	1.03364	3.21718
AV58	GØ	A	2313.75	0.939714	3.48211
AV58	GØ	A	2243.64	0.967984	3.93952
AV58	GØ	A	3890.94	0.93384	3.1029
AV58	GØ	A	1990.89	0.943263	3.02185
AV58	GØ	A	2334.99	1.0282	3.57786
AV58	GØ	A	1662.97	0.9924	3.47614
AV58	GØ	A	3081.3	0.969269	2.68164
AV58	GØ	A	2441.25	1.11136	2.94775
AV58	GØ	A	1972.02	0.988851	2.80118
AV58	GØ	A	2173.7	0.973675	2.8418
AV58	GØ	A	1496.74	0.98983	3.30259
AV58	GØ	A	1708.21	0.985179	2.46623
AV58	GØ	A	1476.7	1.08804	2.60286
AV58	GØ	A	3598.54	1.00097	2.41274
AV58	GØ	A	3484.33	1.01614	3.4032
AV58	GØ	A	2721.56	1.01192	3.51208
AV58	GØ	A	2561.88	1.00959	2.88821
AV58	GØ	A	2696.84	0.969637	3.72652
AV58	GØ	A	2567.07	1.03248	3.61556
AV58	GØ	A	2465.38	0.986709	2.91772
AV58	GØ	A	2701.81	1.00409	2.65636
AV58	GØ	A	2672.88	0.945588	3.6385
AV58	GØ	A	4113.37	0.94155	3.18364
AV58	GØ	A	4193.3	1.06656	4.32822
AV58	GØ	A	3127.93	1.02924	2.93144
AV58	GØ	A	2489.48	1.09441	3.6532
AV58	GØ	A	1667.52	1.02453	3.38526
AV58	GØ	A	1817.89	0.981446	3.35517
AV58	GØ	A	1920.2	1.01137	2.93624
AV58	GØ	A	2792.76	1.03676	3.57376
AV58	GØ	A	1997.49	0.986403	3.53035
AV58	GØ	A	2301.97	1.03425	3.45228
AV58	GØ	A	2858.53	1.03976	3.55114
AV58	GØ	A	2254.07	1.0192	2.89243
AV58	GØ	A	3088.87	0.98781	3.91879
AV58	GØ	A	3497.25	0.997601	3.10343
AV58	GØ	A	3108.26	0.971044	4.34421
AV58	GØ	A	2437.71	0.967678	3.57481
AV58	GØ	A	2605.41	0.98726	3.05981
AV58	GØ	A	2691.25	1.01633	4.53869
AV58	GØ	A	3567.29	1.08639	2.14734
AV58	GØ	A	2329.67	0.978876	3.85658
AV58	GØ	A	2334.02	1.04117	3.71508
AV58	GØ	A	2354.3	0.986342	4.62618
AV58	GØ	A	2386.8	0.991727	3.75018
AV58	GØ	A	2444.07	0.995153	4.21401
AV58	GØ	A	2095.85	0.888864	2.40578
AV58	GØ	A	3078.88	0.999559	3.33067
AV58	GØ	A	3900.71	1.01786	3.99932
AV58	GØ	A	2625.42	1.09936	3.666
AV58	GØ	A	3260	1.05708	3.64793
AV58	GØ	A	3325.09	1.02581	3.15582
AV58	GØ	A	3205.46	1.02728	3.38208
AV58	GØ	A	3208.75	0.981018	3.54913
AV58	GØ	A	2942.1	0.996561	3.93029
AV58	GØ	A	3320.86	1.04258	3.60964
AV58	GØ	A	2760.08	1.008	2.94879
AV58	GØ	A	3643.45	0.977959	2.55703
AV58	GØ	A	3028.54	0.995398	3.04232
AV58	GØ	A	2971.06	1.03089	4.52862
AV58	GØ	A	2468.69	1.03633	4.2638
AV58	GØ	A	0	0.788204	2.71544
AV58	GØ	A	3322.54	0.96107	2.98064
AV58	GØ	A	2127	1.09355	2.8561
AV58	GØ	A	2564.18	0.951218	4.34811
AV58	GØ	A	2316.31	1.02367	3.51267
AV58	GØ	A	1998.38	0.934452	2.92396
AV58	GØ	A	2950.23	1.04086	4.76242
AV58	GØ	A	2946.51	0.990625	4.17079
AV58	GØ	A	2781.21	1.03438	4.48506
AV58	GØ	A	4009.35	0.965353	3.22276
AV58	GØ	A	3198.96	1.01369	2.86013
AV58	GØ	A	3519.7	1.04576	2.90836
AV58	GØ	A	2928.31	0.981263	3.33411
AV58	GØ	A	2982.34	0.988851	2.95789
AV58	GØ	A	3130.67	0.992889	2.8615
AV58	GØ	A	3040.08	0.990503	2.77719
AV58	GØ	A	2836.24	0.969025	3.29673
AV58	GØ	A	2965.65	0.928088	3.52196
AV58	GØ	A	2653.91	0.951402	3.63356
AV58	GØ	A	2508.31	1.1023	3.38936
AV58	GØ	A	2785.11	0.964129	2.84056
AV58	GØ	A	2358.82	0.930107	3.83507
AV58	GØ	A	3686.72	0.870751	3.58521
AV58	GØ	A	3385.87	0.920561	3.2565
AV58	GØ	A	3230.3	1.01229	2.72948
AV58	GØ	A	2792.26	0.941183	2.92428
AV58	GØ	A	3584.56	1.00978	2.28319
AV58	GØ	A	1850	0.941366	2.74085
AV58	GØ	A	2187.69	1.06314	3.11538
AV58	GØ	A	1941.76	1.00537	3.18175
AV58	GØ	A	2394.1	1.0088	3.3668
AV58	GØ	A	2309.64	0.978815	3.96909
AV58	GØ	A	1904.67	0.928271	3.58833
AV58	GØ	A	3365.5	1.03303	2.97239
AV58	GØ	A	3083.15	0.961926	3.88258
AV58	GØ	A	3966.24	0.950178	3.94485
AV58	GØ	A	2599.58	1.02428	2.95016
AV58	GØ	A	3421.3	1.00825	3.07944
AV58	GØ	A	0	0.961253	3.12481
AV58	GØ	A	2849.61	0.968657	3.61822
AV58	GØ	A	0	1.02801	3.34724
AV58	GØ	A	3027.88	1.05995	3.01821
AV58	GØ	A	3368.8	1.05751	2.77082
AV58	GØ	A	2783.75	1.04074	3.30584
AV58	GØ	A	3008.37	1.05371	4.52705
AV58	GØ	A	577.744	1.14599	1.47245
AV58	GØ	A	2672.52	1.07342	3.51338
AV58	GØ	A	2834.62	1.03927	3.60464
AV58	GØ	A	2868.46	0.960274	3.08594
AV58	GØ	A	2819.77	0.949443	4.20225
AV58	GØ	A	3286.32	1.05806	3.02894
AV58	GØ	A	2709.94	1.0181	4.63326
AV58	GØ	A	3165.95	0.96829	3.27983
AV58	GØ	A	2276.07	1.01051	3.74296
AV58	GØ	A	2743.06	0.937633	3.39826
AV58	GØ	A	3212.7	0.992277	2.45876
AV58	GØ	A	2136.73	0.948954	2.98083
AV58	GØ	A	3385.47	0.9246	3.27684
AV58	GØ	A	2074.26	0.98934	3.75336
AV58	GØ	A	2195.66	0.96315	3.78599
AV58	GØ	A	2269.85	0.980835	3.29212
AV58	GØ	A	2109.75	1.0025	3.62388
AV58	GØ	A	2492.93	1.00035	3.72989
AV58	GØ	A	2514.36	1.01773	4.32698
AV58	GØ	A	3270.34	0.95954	3.17694
AV58	GØ	A	2616.09	0.963273	4.47882
AV58	GØ	A	3405.28	1.03793	3.77949
AV58	GØ	A	1635.87	1.00011	3.37629
AV58	GØ	A	2177.8	0.96468	4.62976
AV58	GØ	A	3793.42	1.00629	3.04447
AV58	GØ	A	3189.3	1.05647	3.3215
AV58	GØ	A	2476.18	1.08394	3.24272
AV58	GØ	A	3059.93	0.976245	3.67458
AV58	GØ	A	2905.17	1.01951	4.47701
AV58	GØ	A	3302.77	0.999437	2.45095
AV58	GØ	A	2663.31	0.96982	3.88915
AV58	GØ	A	2915.84	1.00207	4.90574
AV58	GØ	A	3547.6	0.990013	4.25256
AV58	GØ	A	0	0.763422	2.87736
AV58	GØ	A	0	0.923988	3.37746
AV58	GØ	A	3411.04	1.0162	3.10134
AV58	GØ	A	3810.66	0.947485	3.80829
AV58	GØ	A	4293.26	0.990136	2.89042
AV58	GØ	A	2764.71	1.04013	3.92912
AV58	GØ	A	2522.23	1.0025	3.34243
AV58	GØ	A	3618.64	1.06142	3.51838
AV58	GØ	A	2580.73	1.02208	3.97995
AV58	GØ	A	2525.45	1.00727	3.26826
AV58	GØ	A	3098.42	1.00109	3.72112
AV58	GØ	A	2681.17	0.999253	3.40405
AV58	GØ	A	0	0.76795	3.09497
AV58	GØ	A	3009.42	0.964986	3.09809
AV58	GØ	A	2531.84	1.00684	2.76855
AV58	GØ	A	3276.32	0.98524	3.0019
AV58	GØ	A	2983.42	0.982976	3.75122
AV58	GØ	A	2647.87	1.02049	3.75849
AV58	GØ	A	2348.69	1.00482	3.72918
AV58	GØ	A	2389.78	1.02385	3.13573
AV58	GØ	A	2980.89	0.993012	3.04531
AV58	GØ	A	2434.5	1.03927	3.48738
AV58	GØ	A	2832.49	0.946384	3.8261
AV58	GØ	A	2586.37	1.00837	2.8145
AV58	GØ	A	2457	0.907956	3.2125
AV58	GØ	A	2933.67	1.00788	3.1356
AV58	GØ	A	1956.12	0.972941	3.67393
AV58	GØ	A	1275.11	1.01063	2.61118
AV58	GØ	A	1921.34	0.983588	3.89798
AV58	GØ	A	2219.95	1.01002	3.63987
AV58	GØ	A	1876.18	0.992461	3.69649
AV58	GØ	A	2118.46	1.00433	3.52163
AV58	GØ	A	1850.22	0.974593	3.21412
AV58	GØ	A	2561.3	1.03022	3.9585
AV58	GØ	A	2308.61	1.0542	4.40355
AV58	GØ	A	2435.9	0.985118	3.50207
AV58	GØ	A	2928.98	1.03358	3.44571
AV58	GØ	A	3396.14	1.02385	3.88934
AV58	GØ	A	2774.41	0.988483	3.63331
AV58	GØ	A	2594.35	1.00678	3.3603
AV58	GØ	A	3063.43	1.04337	3.27282
AV58	GØ	A	3307.44	1.01896	3.64955
AV58	GØ	A	2837.92	0.922948	3.64891
AV58	GØ	A	2499.14	0.998335	2.84297
AV58	GØ	A	2035.36	0.978203	4.35949
AV58	GØ	A	1760.26	0.96621	3.59898
AV58	GØ	A	2185.97	0.930964	2.54104
AV58	GØ	A	3959.77	1.03444	4.2317
AV58	GØ	A	3037.52	1.02869	3.38488
AV58	GØ	A	3104.74	1.06552	3.63226
AV58	GØ	A	4268.11	0.997846	3.12292
AV58	GØ	A	2628.27	0.99601	2.79026
AV58	GØ	A	2694.8	1.00666	3.44721
AV58	GØ	A	0	0.952442	3.02341
AV58	GØ	A	0	0.948648	3.0747
AV58	GØ	A	3004.59	0.980039	4.07017
AV58	GØ	A	2291.13	0.944426	3.98489
AV58	GØ	A	1875.22	0.993134	3.92619
AV58	GØ	A	2629.7	1.15804	2.77784
AV58	GØ	A	3681.39	1.00794	3.63617
AV58	GØ	A	2425.81	0.998825	3.4253
AV58	GØ	A	0	0.592392	1.35363
AV58	GØ	A	2950.91	1.03205	3.19176
AV58	GØ	A	3613.69	1.03046	3.11766
AV58	GØ	A	2997.26	1.0848	2.79799
AV58	GØ	A	3542.43	0.959295	2.52746
AV58	GØ	A	3498.97	0.967678	2.51511
AV58	GØ	A	2815.5	0.967556	3.98489
AV58	GØ	A	2414.94	1.02348	3.80614
AV58	GØ	A	3269.62	0.991849	2.60468
AV58	GØ	A	3370.95	0.944793	3.39606
AV58	GØ	A	2721.15	1.06057	3.33781
AV58	GØ	A	2687.25	0.941305	5.32285
AV58	GØ	A	2754.2	0.979305	3.78638
AV58	GØ	A	2283.03	1.03982	2.71258
AV58	GØ	A	2858.29	1.05304	3.49498
AV58	GØ	A	2116.56	0.998152	2.8665
AV58	GØ	A	3136.48	0.953298	4.3795
AV58	GØ	A	1855.92	0.956786	3.23284
AV58	GØ	A	3219.26	0.970922	3.00111
AV58	GØ	A	1861.41	1.00678	3.48822
AV58	GØ	A	4273.78	1.02361	4.4397
AV58	GØ	A	3472.85	1.05794	3.20671
AV58	GØ	A	4011.61	0.973492	3.51247
AV58	GØ	A	3123.73	1.01198	3.57299
AV58	GØ	A	2394.89	0.970004	5.30276
AV58	GØ	A	2455.33	0.987504	3.67802
AV58	GØ	A	3902.14	1.03811	3.7698
AV58	GØ	A	2475.69	0.993562	3.28399
AV58	GØ	A	2406.26	1.00525	2.67163
AV58	GØ	A	2544.44	0.975021	3.84215
AV58	GØ	A	2855.27	0.948281	4.03182
AV58	GØ	A	2918.02	0.936104	3.3694
AV58	GØ	A	2237.32	0.947791	2.74014
AV58	GØ	A	1974.52	0.927843	2.71836
AV58	GØ	A	2441.86	0.993256	3.05532
AV58	GØ	A	1840.91	0.997968	2.95308
AV58	GØ	A	0	0.999437	2.72058
AV58	GØ	A	0	1.01284	2.86578
AV58	GØ	A	1833.9	0.940265	4.18457
AV58	GØ	A	2695.26	1.04356	2.97889
AV58	GØ	A	0	0.966638	1.98842
AV58	GØ	A	2501.02	1.04925	4.14973
AV58	GØ	A	0	0.984139	2.24816
AV58	GØ	A	1499.35	1.01804	2.99936
AV58	GØ	A	1484.7	1.01149	3.31975
AV58	GØ	A	2367.5	1.02538	3.39027
AV58	GØ	A	1659.5	1.00072	4.09753
AV58	GØ	A	3881.24	1.03058	2.99169
AV58	GØ	A	3009.29	1.02605	4.69937
AV58	GØ	A	3112.05	1.02838	3.78775
AV58	GØ	A	4001.47	0.963334	3.64513
AV58	GØ	A	2490.31	1.04888	3.44402
AV58	GØ	A	2311.16	1.01443	3.35049
AV58	GØ	A	2817.29	1.02587	3.55563
AV58	GØ	A	3752.21	1.0479	3.23622
AV58	GØ	A	3633.59	1.04374	3.67328
AV58	GØ	A	3273.45	0.999681	3.47379
AV58	GØ	A	2672.03	1.05335	3.73555
AV58	GØ	A	2780.91	0.976245	3.89883
AV58	GØ	A	3124	0.988973	4.94234
AV58	GØ	A	2590.16	0.996499	3.03212
AV58	GØ	A	2964.53	0.967066	2.8587
AV58	GØ	A	2257.87	1.01186	2.64862
AV58	GØ	A	3771.93	0.987198	2.98305
AV58	GØ	A	3195	1.03511	3.12279
AV58	GØ	A	2237.93	0.996561	3.458
AV58	GØ	A	2736.98	1.07923	3.79249
AV58	GØ	A	3335.46	0.993991	3.09836
AV58	GØ	A	0	0.927843	3.67458
AV58	GØ	A	0	0.906793	2.91558
AV58	GØ	A	2448.48	1.04417	3.46216
AV58	GØ	A	3599.06	1.02073	3.37889
AV58	GØ	A	2933.33	0.974532	3.87068
AV58	GØ	A	2316.63	0.98781	2.83277
AV58	GØ	A	2776.13	1.01027	3.14919
AV58	GØ	A	2192.76	0.989462	3.26937
AV58	GØ	A	2397.1	0.93898	2.63464
AV58	GØ	A	2698.04	0.898777	3.09264
AV58	GØ	A	1986.41	0.984384	3.95135
AV58	GØ	A	1867.61	0.933228	3.36843
AV58	GØ	A	2205.52	0.919337	4.00225
AV58	GØ	A	3197.47	0.969025	3.51293
AV58	GØ	A	2210.26	0.947546	3.17415
AV58	GØ	A	2802.51	1.01351	2.98213
AV58	GØ	A	2890.09	0.946078	3.51592
AV58	GØ	A	2521.48	1.00788	3.66015
AV58	GØ	A	3504.59	1.03774	3.90202
AV58	GØ	A	5272.78	0.951952	3.46339
AV58	GØ	A	3782.4	1.0047	4.16351
AV58	GØ	A	4094.38	0.944915	2.38212
AV58	GØ	A	3894.47	1.00341	3.52222
AV58	GØ	A	3045.83	0.993685	4.30092
AV58	GØ	A	3497.43	1.01088	4.00094
AV58	GØ	A	0	0.986525	3.47997
AV58	GØ	A	3473.93	0.957827	4.4135
AV58	GØ	A	3224.71	0.984506	4.04931
AV58	GØ	A	3167.4	0.987994	3.95161
AV58	GØ	A	3016.5	0.986281	4.54915
AV58	GØ	A	3442.19	1.03676	3.19429
AV58	GØ	A	2431.5	1.03052	3.0264
AV58	GØ	A	3163.43	0.92307	3.78573
AV58	GØ	A	2184.72	0.987627	3.84715
AV58	GØ	A	2304.16	0.963946	4.24392
AV58	GØ	A	2312.18	0.970432	2.70588
AV58	GØ	A	3037.45	1.01131	3.07613
AV58	GØ	A	2195.15	0.998641	3.34594
AV58	GØ	A	2151.53	0.991421	3.2788
AV58	GØ	A	3314.79	0.997601	2.78759
AV58	GØ	A	2240.62	0.999681	3.67802
AV58	GØ	A	2637.4	0.953788	3.13716
AV58	GØ	A	1856.79	1.03707	2.751
AV58	GØ	A	1808.56	0.967066	2.46454
AV58	GØ	A	2356.07	1.03438	3.82759
AV58	GØ	A	2395.21	0.95905	2.99143
AV58	GØ	A	2607.73	1.00972	3.74257
AV58	GØ	A	2271.7	0.922458	4.10222
AV58	GØ	A	2085.79	0.977102	2.59441
AV58	GØ	A	2151.77	0.985791	3.45144
AV58	GØ	A	2948.41	1.03181	4.69872
AV58	GØ	A	3180.22	1.01522	2.82679
AV58	GØ	A	4050.14	0.910036	2.90628
AV58	GØ	A	2674.69	0.958561	3.16381
AV58	GØ	A	2861.25	1.02728	4.1626
AV58	GØ	A	3048.55	1.07941	6.00236
AV58	GØ	A	2358.12	0.978632	3.92626
AV58	GØ	A	3352.22	1.02153	4.45894
AV58	GØ	A	3128.42	0.957643	3.45371
AV58	GØ	A	3057.4	1.00152	2.82139
AV58	GØ	A	3544.36	0.960274	3.04551
AV58	GØ	A	2023.68	1.00513	2.88606
AV58	GØ	A	2792.33	0.950912	3.06995
AV58	GØ	A	3348.07	1.03211	4.03812
AV58	GØ	A	3568.65	0.976612	2.77752
AV58	GØ	A	3227.36	0.913952	2.95568
AV58	GØ	A	2764.55	1.06552	5.31161
AV58	GØ	A	2787.99	0.973553	2.95035
AV58	GØ	A	3244.38	0.954094	3.43246
AV58	GØ	A	2755.91	0.929434	3.35446
AV58	GØ	A	2736.95	1.0449	2.891
AV58	GØ	A	2313.53	0.956786	3.20912
AV58	GØ	A	2102.78	1.00678	3.40392
AV58	GØ	A	1870.96	0.985118	3.33528
AV58	GØ	A	2613.7	0.964252	3.21002
AV58	GØ	A	2759.17	1.00959	3.35588
AV58	GØ	A	3302.33	0.948158	3.53691
AV58	GØ	A	2484.08	0.982793	3.53165
AV58	GØ	A	1868.43	0.943141	2.58681
AV58	GØ	A	0	0.966516	1.5834
AV58	GØ	A	0	1.017	2.28625
AV58	GØ	A	0	1.05787	2.04204
AV58	GØ	A	2544.76	0.960641	4.14706
AV58	GØ	A	3116.72	0.973124	3.75648
AV58	GØ	A	2527.51	0.977224	4.00218
AV58	GØ	A	2829.74	1.01987	3.31292
AV58	GØ	A	2759.28	1.02581	4.10384
AV58	GØ	A	3475.15	0.981202	4.81839
AV58	GØ	A	2761.41	1.03946	3.5607
AV58	GØ	A	3649.29	0.893759	3.12215
AV58	GØ	A	3515.37	0.966516	3.17746
AV58	GØ	A	0	0.811274	2.36964
AV58	GØ	A	0	0.719242	2.30529
AV58	GØ	A	0	1.04252	2.60254
AV58	GØ	A	2355.56	0.983282	4.05607
AV58	GØ	A	4056.25	1.00048	1.86322
AV58	GØ	A	2043.93	1.0386	3.25858
AV58	GØ	A	2504.65	1.01167	3.11837
AV58	GØ	A	2417.25	1.0058	3.66925
AV58	GØ	A	4313.03	0.968841	2.98584
AV58	GØ	A	2650.73	1.04606	3.20021
AV58	GØ	A	2703.23	0.947118	4.2276
AV58	GØ	A	2652.12	0.912606	3.5906
AV58	GØ	A	2221.39	0.984016	2.95691
AV58	GØ	A	2244.65	1.02722	3.58
AV58	GØ	A	1991.57	0.967066	2.57107
AV58	GØ	A	2329.13	0.965292	3.31571
AV58	GØ	A	2999.21	1.0017	5.25109
AV58	GØ	A	418.305	1.11056	1.45249
AV58	GØ	A	3343.01	1.01859	4.4174
AV58	GØ	A	3825.55	0.952809	2.01741
AV58	GØ	A	4462.75	1.05298	3.65072
AV58	GØ	A	3979.14	0.979549	3.76824
AV58	GØ	A	3765.49	1.04056	3.67543
AV58	GØ	A	2996.99	0.998947	3.76734
AV58	GØ	A	4532.24	0.990258	2.51101
AV58	GØ	A	3855.54	1.01265	2.9783
AV58	GØ	A	3268.24	1.01822	4.56963
AV58	GØ	A	3608.56	1.01308	3.15075
AV58	GØ	A	3381.07	0.955257	3.33976
AV58	GØ	A	3606.52	1.01584	3.76785
AV58	GØ	A	3174.79	1.05867	2.78635
AV58	GØ	A	3207.94	0.970248	4.16969
AV58	GØ	A	3994.37	0.901041	2.88685
AV58	GØ	A	2548.73	1.03028	4.09558
AV58	GØ	A	3687.41	1.0069	2.49035
AV58	GØ	A	2468.2	1.00445	2.9991
AV58	GØ	A	2189.61	0.995826	2.93351
AV58	GØ	A	0	0.671268	2.9642
AV58	GØ	A	2790.08	1.00323	3.6142
AV58	GØ	A	1836.33	0.96107	3.73406
AV58	GØ	A	3475.88	0.971472	3.91209
AV58	GØ	A	4125.33	0.990809	2.91883
AV58	GØ	A	4801.32	0.960029	3.09361
AV58	GØ	A	3000.38	1.08963	2.86578
AV58	GØ	A	4406.36	0.966944	2.82796
AV58	GØ	A	3072.17	0.998335	5.12674
AV58	GØ	A	3239.5	1.04729	2.63744
AV58	GØ	A	2604.87	0.968351	4.02038
AV58	GØ	A	3187.41	1.01186	3.71007
AV58	GØ	A	2749.75	1.03695	3.41153
AV58	GØ	A	3923.56	1.02453	2.0774
AV58	GØ	A	2888.89	0.954094	5.28327
AV58	GØ	A	3885.99	0.960029	3.38351
AV58	GØ	A	3008.74	0.987872	3.8909
AV58	GØ	A	2631.4	0.950545	2.95646
AV58	GØ	A	3558.89	0.901531	3.85963
AV58	GØ	A	3491.98	0.980896	2.77277
AV58	GØ	A	2981.99	0.931392	2.80904
AV58	GØ	A	3398.4	0.976123	3.66269
AV58	GØ	A	2667.2	1.02263	3.23928
AV58	GØ	A	2647.19	1.04252	3.0693
AV58	GØ	A	2885.73	0.966944	2.78753
AV58	GØ	A	2568.92	1.00959	5.76544
AV58	GØ	A	2558.21	0.984322	3.93023
AV58	GØ	A	0	0.934635	3.08639
AV58	GØ	A	2429.33	0.975878	3.13788
AV58	GØ	A	2254.03	1.01724	3.05539
AV58	GØ	A	2173.18	1.07348	2.91304
AV58	GØ	A	3075.9	1.07642	3.32287
AV58	GØ	A	1531.66	0.959907	3.22173
AV58	GØ	A	3589.55	0.941244	2.63114
AV58	GØ	A	2442.36	1.08376	3.15789
AV58	GØ	A	3521.16	0.990686	3.27555
AV58	GØ	A	3838.82	1.03487	3.84065
AV58	GØ	A	5714.68	0.94363	3.74504
AV58	GØ	A	3838.21	0.954216	3.57207
AV58	GØ	A	4004.23	1.00978	3.57994
AV58	GØ	A	2332.08	1.03242	3.81699
AV58	GØ	A	2426.29	0.94822	3.13827
AV58	GØ	A	2197.96	0.96058	2.98265
AV58	GØ	A	2232.62	1.06136	3.04044
AV58	GØ	A	2856.45	1.00684	2.96602
AV58	GØ	A	2385.29	0.997846	3.25312
AV58	GØ	A	1950.58	1.02251	3.4829
AV58	GØ	A	1602.36	0.949076	3.11903
AV58	GØ	A	3806.89	0.980957	2.69074
AV58	GØ	A	2252.51	1.02116	3.41952
AV58	GØ	A	2855.63	0.948403	3.63935
AV58	GØ	A	2638.68	1.12635	3.62557
AV58	GØ	A	3621.77	0.992033	3.02978
AV58	GØ	A	3022.59	0.961743	3.23772
AV58	GØ	A	2611.15	0.983649	3.95694
AV58	GØ	A	2419.44	1.01119	4.05541
AV58	GØ	A	2449.54	0.977163	3.81336
AV58	GØ	A	2308.77	1.02251	3.88239
AV58	GØ	A	2393.61	1.01957	3.03803
AV58	GØ	A	2670.73	0.981691	3.35816
AV58	GØ	A	2754.9	1.00941	2.94827
AV58	GØ	A	2466.67	0.988789	3.50915
AV58	GØ	A	2518.91	1.0271	3.16056
AV58	GØ	A	1197.43	0.984506	3.23947
AV58	GØ	A	2229.46	0.969881	3.39007
AV58	GØ	A	1720.18	0.993929	4.24509
AV58	GØ	A	2713.4	0.992033	3.23563
AV58	GØ	A	1603.86	1.04802	3.43648
AV58	GØ	A	3044.6	1.01229	2.77556
AV58	GØ	A	3064.32	1.10108	2.66279
AV58	GØ	A	4321.14	1.00488	2.65083
AV58	GØ	A	2600.85	0.955624	3.46339
AV58	GØ	A	2285.33	0.964741	3.52332
AV58	GØ	A	2601.39	1.05524	3.15958
AV58	GØ	A	2546.63	1.02404	3.57714
AV58	GØ	A	3092.93	0.960703	2.45121
AV58	GØ	A	0	0.917991	3.47367
AV58	GØ	A	0	0.99601	2.99085
AV58	GØ	A	2598.56	1.00329	4.68663
AV58	GØ	A	2839.51	0.99038	2.7159
AV58	GØ	A	2142.19	1.00403	3.5763
AV58	GØ	A	2993.52	0.928026	3.55037
AV58	GØ	A	2130.63	0.970983	3.89539
AV58	GØ	A	3362.12	0.977163	2.63965
AV58	GØ	A	2340.95	0.97802	3.36518
AV58	GØ	A	2057.39	1.00348	3.69941
AV58	GØ	A	3071.25	0.991421	4.26218
AV58	GØ	A	2236.56	0.964496	3.65111
AV58	GØ	A	2235.75	0.960397	4.07095
AV58	GØ	A	2469.22	1.04851	2.97024
AV58	GØ	A	1923.44	0.945711	3.50662
AV58	GØ	A	3317.51	0.931882	4.56664
AV58	GØ	A	2728.12	0.982303	3.46014
AV58	GØ	A	3868.69	0.987137	2.2397
AV58	GØ	A	4911.02	1.10395	2.22164
AV58	GØ	A	2833.66	0.984322	4.62267
AV58	GØ	A	3879.42	1.04398	4.48851
AV58	GØ	A	3798.58	0.962905	3.12852
AV58	GØ	A	3019.76	1.06197	3.78502
AV58	GØ	A	2479.91	1.01871	3.87673
AV58	GØ	A	3417.66	1.00427	3.11174
AV58	GØ	A	2985.39	1.01626	3.37038
AV58	GØ	A	2677.89	0.981385	3.91625
AV58	GØ	A	0	0.819963	3.22368
AV58	GØ	A	2058.11	0.964986	3.1772
AV58	GØ	A	2554.06	1.12194	3.24545
AV58	GØ	A	2071.4	0.987933	3.00411
AV58	GØ	A	2299.84	1.03585	3.53294
AV58	GØ	A	2164.83	0.94363	3.09634
AV58	GØ	A	1767.22	0.960397	4.18262
AV58	GØ	A	4374.67	0.996377	3.46671
AV58	GØ	A	3397.24	1.04398	3.40808
AV58	GØ	A	3718.62	1.08278	4.31736
AV58	GØ	A	3203.82	1.02434	3.68544
AV58	GØ	A	2993.14	0.952809	2.17529
AV58	GØ	A	2966.51	0.978693	4.04898
AV58	GØ	A	4496.62	1.08621	3.22173
AV58	GØ	A	3055.28	1.09814	3.63675
AV58	GØ	A	4462.68	0.993685	2.59363
AV58	GØ	A	2639.13	1.00256	3.57299
AV58	GØ	A	2670.44	0.728237	2.7909
AV58	GØ	A	2190.51	0.956664	3.34347
AV58	GØ	A	2713.92	0.91897	3.93549
AV58	GØ	A	2474.23	0.948281	5.13819
AV58	GØ	A	2383.54	0.92974	2.91532
AV58	GØ	A	3943.28	1.01902	2.93085
AV58	GØ	A	2462.17	1.02605	3.93419
AV58	GØ	A	2507.1	0.988973	3.64735
AV58	GØ	A	2537.97	1.00286	2.76023
AV58	GØ	A	2512.38	0.978509	2.98805
AV58	GØ	A	1862.63	0.947118	3.40574
AV58	GØ	A	2801.26	0.991053	4.12223
AV58	GØ	A	1919.62	1.0099	3.46924
AV58	GØ	A	3582	0.986219	2.71186
AV58	GØ	A	3247.67	0.998886	2.10106
AV58	GØ	A	2036.69	0.947363	4.06445
AV58	GØ	A	3542.51	0.948097	3.94803
AV58	GØ	A	2502.84	0.983527	3.88505
AV58	GØ	A	3927.89	0.96419	2.60169
AV58	GØ	A	4181.31	1.03083	3.07125
AV58	GØ	A	3110.2	1.01376	3.36017
AV58	GØ	A	3205.18	0.956358	3.76467
AV58	GØ	A	2748.14	0.916339	3.68582
AV58	GØ	A	2876.3	1.00947	2.96322
AV58	GØ	A	0	0.794936	3.77845
AV58	GØ	A	3226.57	1.02599	3.43837
AV58	GØ	A	3027.12	0.91897	4.29969
AV58	GØ	A	2617.88	1.00647	2.99656
AV58	GØ	A	2841.13	0.890394	3.79814
AV58	GØ	A	2565.12	1.05995	2.5792
AV58	GØ	A	2449.96	0.970248	3.72385
AV58	GØ	A	2305.98	0.994725	3.48433
AV58	GØ	A	0	0.879991	2.43743
AV58	GØ	A	1936.07	1.03731	3.1629
AV58	GØ	A	2004.9	0.940938	3.29524
AV58	GØ	A	2283	1.08578	3.17792
LC69	GØ	A	0	0.961437	3.72099
LC69	GØ	A	586.157	0.971778	3.66951
LC69	GØ	A	537.107	1.01779	4.82775
LC69	GØ	A	656.66	0.928883	3.4032
LC69	GØ	A	582.915	0.987872	3.96175
LC69	GØ	A	581.499	1.02752	4.11873
LC69	GØ	A	616.957	0.949872	2.90335
LC69	GØ	A	586.533	0.968474	3.12995
LC69	GØ	A	529.015	0.976	4.40226
LC69	GØ	A	539.46	0.981997	3.1098
LC69	GØ	A	505.569	0.950484	3.47243
LC69	GØ	A	322.928	0.862001	2.65674
LC69	GØ	A	585.891	0.956786	2.634
LC69	GØ	A	571.508	1.01486	2.8249
LC69	GØ	A	573.359	1.06136	3.88628
LC69	GØ	A	623.982	1.00011	5.04978
LC69	GØ	A	515.847	0.947914	3.58793
LC69	GØ	A	605.524	1.04343	3.52996
LC69	GØ	A	0	0.880542	4.1834
LC69	GØ	A	575.407	0.951891	4.09851
LC69	GØ	A	602.913	1.00605	3.82648
LC69	GØ	A	548.685	0.900613	3.93179
LC69	GØ	A	494.889	1.00586	2.57634
LC69	GØ	A	582.236	1.06571	3.26164
LC69	GØ	A	533.734	0.998764	2.81469
LC69	GØ	A	505.448	0.954461	4.77035
LC69	GØ	A	0	0.929801	3.02516
LC69	GØ	A	0	1.01076	3.01672
LC69	GØ	A	436.718	0.953482	4.42195
LC69	GØ	A	532.566	0.967128	4.52783
LC69	GØ	A	0	0.716855	4.35389
LC69	GØ	A	0	0.779332	1.41264
LC69	GØ	A	584.654	1.00476	4.27862
LC69	GØ	A	586.036	1.02673	3.51864
LC69	GØ	A	613.648	1.03297	3.74738
LC69	GØ	A	610.11	0.986342	3.64273
LC69	GØ	A	642.002	0.941489	3.7596
LC69	GØ	A	603.881	0.910648	3.25578
LC69	GØ	A	543.937	0.973124	4.47363
LC69	GØ	A	571.471	0.991543	2.97252
LC69	GØ	A	539.902	0.975266	3.97377
LC69	GØ	A	643.787	0.947914	3.96604
LC69	GØ	A	660.812	0.979366	4.49585
LC69	GØ	A	582.342	1.04582	3.59261
LC69	GØ	A	613.063	0.925579	4.16695
LC69	GØ	A	579.192	0.97288	3.13859
LC69	GØ	A	556.352	1.01975	2.93839
LC69	GØ	A	602.056	0.997417	3.72808
LC69	GØ	A	561.862	0.987933	4.12185
LC69	GØ	A	569.222	1.00862	3.07437
LC69	GØ	A	509.114	1.04245	4.30645
LC69	GØ	A	592.952	0.965047	4.17079
LC69	GØ	A	614.271	0.887885	2.38946
LC69	GØ	A	609.685	0.926864	3.69973
LC69	GØ	A	581.644	1.01853	3.80308
LC69	GØ	A	603.59	0.99754	3.04057
LC69	GØ	A	649.51	0.992889	3.15536
LC69	GØ	A	651.801	0.954216	3.25689
LC69	GØ	A	572.438	0.980529	3.77052
LC69	GØ	A	578.115	0.941366	3.87153
LC69	GØ	A	690.56	0.908506	2.51089
LC69	GØ	A	536.429	0.963701	3.88368
LC69	GØ	A	616.927	1.01688	2.78466
LC69	GØ	A	663.732	1.08486	3.55245
LC69	GØ	A	602.067	1.02091	4.18009
LC69	GØ	A	487.764	0.935675	3.55498
LC69	GØ	A	678.031	1.03199	3.2669
LC69	GØ	A	614.388	0.943263	2.89237
LC69	GØ	A	640.323	0.929128	4.11866
LC69	GØ	A	616.042	0.970004	3.81329
LC69	GØ	A	585.736	0.981446	4.46258
LC69	GØ	A	480.232	0.993073	4.35351
LC69	GØ	A	522.911	1.10034	3.31689
LC69	GØ	A	586.759	1.06993	4.28669
LC69	GØ	A	590.804	0.934819	4.39933
LC69	GØ	A	658.155	1.03609	1.90573
LC69	GØ	A	572.518	0.940693	3.29628
LC69	GØ	A	579.468	0.940754	3.63876
LC69	GØ	A	598.742	0.940387	3.0667
LC69	GØ	A	593.369	0.964435	3.00287
LC69	GØ	A	613.308	0.915482	3.22842
LC69	GØ	A	648.127	0.985669	3.20547
LC69	GØ	A	601.368	1.01504	2.77849
LC69	GØ	A	615.223	0.99191	2.39369
LC69	GØ	A	660.202	1.00788	3.48582
LC69	GØ	A	602.39	0.938735	3.18253
LC69	GØ	A	627.29	0.997662	3.46184
LC69	GØ	A	529.941	0.909853	3.5204
LC69	GØ	A	580.807	0.988728	3.20541
LC69	GØ	A	577.521	0.93953	4.71725
LC69	GØ	A	451.729	0.90918	3.82577
LC69	GØ	A	476.073	0.967556	2.85363
LC69	GØ	A	609.314	1.0173	3.15776
LC69	GØ	A	565.367	1.04796	3.06566
LC69	GØ	A	580.535	0.91383	3.45592
LC69	GØ	A	625.073	1.09275	4.14225
LC69	GØ	A	581.755	0.951463	3.25435
LC69	GØ	A	616.383	1.04692	3.44441
LC69	GØ	A	575.091	1.05439	2.67709
LC69	GØ	A	565.15	0.993746	3.02815
LC69	GØ	A	592.866	0.935798	2.49411
LC69	GØ	A	565.152	0.981752	3.78612
LC69	GØ	A	614.473	0.979305	3.26345
LC69	GØ	A	621.233	1.02018	4.03942
LC69	GØ	A	556.721	0.969881	3.52222
LC69	GØ	A	624.093	0.947914	3.29264
LC69	GØ	A	585.828	0.955868	3.21705
LC69	GØ	A	579.605	0.981385	3.72066
LC69	GØ	A	539.037	0.976796	3.72235
LC69	GØ	A	567.511	1.01504	3.26053
LC69	GØ	A	539.377	0.989462	2.99871
LC69	GØ	A	571.42	1.0036	2.76978
LC69	GØ	A	548.63	1.00684	2.64674
LC69	GØ	A	566.281	1.04282	3.83975
LC69	GØ	A	524.825	0.998519	3.38396
LC69	GØ	A	436.3	0.972268	4.25938
LC69	GØ	A	446.367	0.984751	3.77942
LC69	GØ	A	497.28	1.01112	4.5281
LC69	GØ	A	541.126	1.00458	2.9638
LC69	GØ	A	572.963	1.04961	2.92266
LC69	GØ	A	615.42	1.01804	2.90284
LC69	GØ	A	548.02	0.969086	2.96666
LC69	GØ	A	585.52	0.937328	4.89872
LC69	GØ	A	542.726	1.00323	2.98564
LC69	GØ	A	553.162	0.91022	4.33563
LC69	GØ	A	628.495	1.01883	3.58254
LC69	GØ	A	589.018	0.974287	4.53407
LC69	GØ	A	591.932	0.913769	4.89008
LC69	GØ	A	639.281	1.02716	2.70023
LC69	GØ	A	538.894	0.959724	2.94678
LC69	GØ	A	0	0.984322	3.74107
LC69	GØ	A	0	0.944793	4.22623
LC69	GØ	A	531.639	0.958561	4.15149
LC69	GØ	A	494.659	1.02306	3.06085
LC69	GØ	A	610.265	1.04931	3.44857
LC69	GØ	A	399.84	0.961865	4.32074
LC69	GØ	A	613.968	1.09159	3.11305
LC69	GØ	A	596.066	0.934146	3.18922
LC69	GØ	A	593.129	1.023	3.30915
LC69	GØ	A	623.164	1.02728	3.74017
LC69	GØ	A	548.106	0.986892	3.35927
LC69	GØ	A	606.598	0.981814	3.77448
LC69	GØ	A	555.607	0.951524	3.91332
LC69	GØ	A	551.094	1.0233	3.28269
LC69	GØ	A	511.421	0.960152	4.82287
LC69	GØ	A	601.326	0.987749	3.1642
LC69	GØ	A	555.916	0.885805	3.41283
LC69	GØ	A	571.238	0.968229	3.43447
LC69	GØ	A	568.25	0.924233	3.84897
LC69	GØ	A	545.937	0.925273	2.87716
LC69	GØ	A	559.679	0.98677	2.90686
LC69	GØ	A	567.848	1.01645	2.66552
LC69	GØ	A	476.432	1.00837	3.24545
LC69	GØ	A	604.006	0.976796	3.09159
LC69	GØ	A	522.148	0.995949	4.01713
LC69	GØ	A	514.626	1.03071	2.10145
LC69	GØ	A	629.767	1.02697	3.1603
LC69	GØ	A	631.038	1.02465	3.91826
LC69	GØ	A	611.419	1.03432	3.65385
LC69	GØ	A	0	0.981997	3.63922
LC69	GØ	A	589.887	1.0077	3.02503
LC69	GØ	A	0	0.97392	3.65423
LC69	GØ	A	606.653	0.968474	4.32529
LC69	GØ	A	630.72	1.03615	4.68006
LC69	GØ	A	567.994	0.934819	2.97505
LC69	GØ	A	573.67	0.965537	3.25384
LC69	GØ	A	610.191	0.973492	2.61124
LC69	GØ	A	606.983	0.967495	5.18602
LC69	GØ	A	487.282	0.972635	4.18639
LC69	GØ	A	591.158	0.98781	3.18994
LC69	GØ	A	606.953	1.01388	4.17436
LC69	GØ	A	558.304	0.980957	3.53762
LC69	GØ	A	533.377	0.96725	2.61755
LC69	GØ	A	571.456	0.984812	3.37968
LC69	GØ	A	570.157	1.05255	3.66184
LC69	GØ	A	618.156	1.02269	2.95711
LC69	GØ	A	627.743	0.962049	4.16065
LC69	GØ	A	496.727	0.967678	2.34462
LC69	GØ	A	604.482	0.990319	4.3524
LC69	GØ	A	0	0.927721	4.48689
LC69	GØ	A	644.694	1.00048	4.02578
LC69	GØ	A	670.635	1.06405	3.05025
LC69	GØ	A	568.315	0.947057	3.03647
LC69	GØ	A	416.049	1.04704	3.41465
LC69	GØ	A	701.338	1.02404	3.68426
LC69	GØ	A	562.36	0.979488	3.01236
LC69	GØ	A	620.686	0.93439	3.03647
LC69	GØ	A	583.781	0.947118	3.76591
LC69	GØ	A	621.996	0.963334	3.0641
LC69	GØ	A	528.729	1.01253	4.10254
LC69	GØ	A	599.261	0.939898	3.43304
LC69	GØ	A	611.976	1.01143	4.52231
LC69	GØ	A	594.711	0.994909	2.82756
LC69	GØ	A	582.88	0.995214	3.56863
LC69	GØ	A	621.949	0.954216	3.49745
LC69	GØ	A	559.589	0.990809	3.3163
LC69	GØ	A	614.654	0.997601	3.12839
LC69	GØ	A	544.246	0.900735	3.03992
LC69	GØ	A	553.789	0.928638	4.06009
LC69	GØ	A	583.956	0.989034	3.71891
LC69	GØ	A	490.44	1.00562	3.97065
LC69	GØ	A	455.475	0.925885	3.05045
LC69	GØ	A	492.893	1.06981	3.45462
LC69	GØ	A	523.777	0.953115	3.93296
LC69	GØ	A	581.547	0.950422	4.10124
LC69	GØ	A	454.021	0.962905	3.34308
LC69	GØ	A	591.685	1.0036	3.76642
LC69	GØ	A	641.385	0.984078	3.80666
LC69	GØ	A	623.192	1.11044	3.52859
LC69	GØ	A	629.588	1.03909	3.93087
LC69	GØ	A	595.8	0.919766	4.56326
LC69	GØ	A	540.836	0.991849	4.77133
LC69	GØ	A	554.391	0.959479	4.09025
LC69	GØ	A	592.205	0.927904	3.28913
LC69	GØ	A	606.433	0.912851	5.29106
LC69	GØ	A	575.971	0.959846	3.57058
LC69	GØ	A	560.898	0.984445	3.84078
LC69	GØ	A	563.112	1.03689	2.97934
LC69	GØ	A	501.729	1.04129	2.43685
LC69	GØ	A	420.859	0.974165	2.53104
LC69	GØ	A	493.808	0.945282	2.83049
LC69	GØ	A	650.461	0.979549	4.07745
LC69	GØ	A	583.311	1.05286	4.0224
LC69	GØ	A	645.006	1.08149	2.93241
LC69	GØ	A	607.721	0.919888	2.59474
LC69	GØ	A	536.225	1.01247	4.92843
LC69	GØ	A	583.504	1.05096	2.97362
LC69	GØ	A	547.057	0.953115	3.02718
LC69	GØ	A	635.769	0.953727	4.48142
LC69	GØ	A	578.674	1.00574	3.80224
LC69	GØ	A	542.206	0.953543	4.07102
LC69	GØ	A	544.084	0.978203	4.00458
LC69	GØ	A	537.278	0.949872	3.89954
LC69	GØ	A	538.172	0.95593	4.28707
LC69	GØ	A	541.712	0.962416	3.85788
LC69	GØ	A	531.764	0.955257	3.72775
LC69	GØ	A	524.368	0.932555	4.65134
LC69	GØ	A	475.059	0.92564	2.96673
LC69	GØ	A	521.862	1.01376	3.06475
LC69	GØ	A	499.229	0.963823	3.41438
LC69	GØ	A	483.621	0.988912	4.45127
LC69	GØ	A	423.407	1.01651	2.97993
LC69	GØ	A	539.478	0.924294	5.0689
LC69	GØ	A	596.257	1.00329	2.72044
LC69	GØ	A	610.892	0.979917	3.31155
LC69	GØ	A	426.92	0.963273	3.0849
LC69	GØ	A	644.303	1.011	2.93696
LC69	GØ	A	614.191	1.00702	4.35214
LC69	GØ	A	655.776	0.971778	4.00816
LC69	GØ	A	630.13	0.915605	3.57734
LC69	GØ	A	560.217	0.944303	2.79942
LC69	GØ	A	572.994	0.966944	2.98889
LC69	GØ	A	538.236	0.9544	2.2375
LC69	GØ	A	576.764	1.00972	3.3319
LC69	GØ	A	571.584	0.972696	3.50961
LC69	GØ	A	512.103	0.962294	3.56051
LC69	GØ	A	536.934	1.01883	3.02458
LC69	GØ	A	496.389	0.965476	3.33515
LC69	GØ	A	387.266	1.00751	3.20697
LC69	GØ	A	591.742	1.00078	3.258
LC69	GØ	A	616.711	1.00868	3.35673
LC69	GØ	A	584.277	1.01877	3.95447
LC69	GØ	A	585.799	0.945344	3.44624
LC69	GØ	A	649.568	1.03003	4.11977
LC69	GØ	A	695.73	1.03676	3.09244
LC69	GØ	A	601.24	0.969942	2.89367
LC69	GØ	A	677.486	0.94516	3.02016
LC69	GØ	A	699.351	1.04129	3.04076
LC69	GØ	A	576.203	0.937633	2.97336
LC69	GØ	A	646.366	0.975694	4.53726
LC69	GØ	A	639.304	0.96162	3.68173
LC69	GØ	A	616.659	0.900674	3.98918
LC69	GØ	A	633.868	1.0069	4.27622
LC69	GØ	A	629.913	0.996316	3.20996
LC69	GØ	A	507.103	0.973247	3.45163
LC69	GØ	A	566.386	0.903244	3.86776
LC69	GØ	A	649.823	0.887518	2.86682
LC69	GØ	A	608.667	0.936838	3.1551
LC69	GØ	A	606.438	1.01516	3.6818
LC69	GØ	A	561.027	0.985057	3.23297
LC69	GØ	A	612.255	0.99344	4.03643
LC69	GØ	A	568.604	0.996071	3.40951
LC69	GØ	A	582.408	1.05249	3.54068
LC69	GØ	A	516.405	1.02434	3.6064
LC69	GØ	A	484.03	1.01779	4.50736
LC69	GØ	A	429.705	0.939592	3.34965
LC69	GØ	A	576.027	0.968535	4.16643
LC69	GØ	A	621.566	0.949137	2.95886
LC69	GØ	A	616.519	0.918236	4.35292
LC69	GØ	A	584.713	0.995459	3.16407
LC69	GØ	A	618.494	0.929006	3.07086
LC69	GØ	A	587.099	0.960641	3.38227
LC69	GØ	A	582.663	0.93182	2.67638
LC69	GØ	A	631.55	0.972941	2.54865
LC69	GØ	A	530.768	0.95905	5.32337
LC69	GØ	A	554.522	0.999192	2.91389
LC69	GØ	A	0	0.943141	2.29658
LC69	GØ	A	0	0.945772	2.84564
LC69	GØ	A	527.91	0.921601	3.28075
LC69	GØ	A	604.035	0.929311	4.165
LC69	GØ	A	531.504	1.00825	3.07034
LC69	GØ	A	592.87	0.948158	4.91134
LC69	GØ	A	550.67	1.04784	2.24445
LC69	GØ	A	579.173	1.00623	3.20365
LC69	GØ	A	485.098	0.919704	4.34779
LC69	GØ	A	541.822	0.913402	2.73163
LC69	GØ	A	579.882	0.923131	3.14126
LC69	GØ	A	587.484	0.92613	2.9872
LC69	GØ	A	611.406	0.942345	3.71754
LC69	GØ	A	655.04	0.942162	1.74512
LC69	GØ	A	566.851	0.935002	3.4192
LC69	GØ	A	548.828	1.03432	2.52115
LC69	GØ	A	504.231	1.00782	3.23161
LC69	GØ	A	563.842	0.985118	3.43031
LC69	GØ	A	560.427	0.929128	2.86026
LC69	GØ	A	522.397	1.00972	3.65618
LC69	GØ	A	500.523	0.927598	2.62119
LC69	GØ	A	521.892	0.946078	3.46112
LC69	GØ	A	448.418	0.949199	4.07127
LC69	GØ	A	544.581	1.00647	3.71787
LC69	GØ	A	578.754	0.96419	3.0136
LC69	GØ	A	579.298	0.985852	3.23823
LC69	GØ	A	560.419	1.05224	4.29221
LC69	GØ	A	552.129	1.03939	3.40808
LC69	GØ	A	597.54	0.954155	3.28224
LC69	GØ	A	551.365	1.02153	4.04073
LC69	GØ	A	0	0.887273	2.592
LC69	GØ	A	525.819	0.937939	2.26024
LC69	GØ	A	605.108	1.00225	5.12928
LC69	GØ	A	549.907	0.977347	3.68582
LC69	GØ	A	0	0.876259	3.53152
LC69	GØ	A	589.795	1.03364	3.74107
LC69	GØ	A	0	0.652299	2.76517
LC69	GØ	A	0	0.868549	3.72989
LC69	GØ	A	523.425	0.897737	2.62717
LC69	GØ	A	537.169	0.99497	3.42908
LC69	GØ	A	444.356	0.986892	3.24044
LC69	GØ	A	501.776	0.966332	3.95532
LC69	GØ	A	407.027	1.00813	2.34761
LC69	GØ	A	569.815	0.997417	4.34818
LC69	GØ	A	597.404	1.06301	3.35504
LC69	GØ	A	583.982	1.04466	3.0199
LC69	GØ	A	611.256	0.956052	3.95356
LC69	GØ	A	641.681	1.00819	2.81768
LC69	GØ	A	585.092	1.06675	3.19891
LC69	GØ	A	601.549	1.01027	3.46794
LC69	GØ	A	611.429	0.995826	2.49145
LC69	GØ	A	574.809	0.956542	3.25169
LC69	GØ	A	578.758	0.945588	3.18032
LC69	GØ	A	561.39	0.923131	3.814
LC69	GØ	A	545.487	0.998396	2.99825
LC69	GØ	A	573.654	0.960703	4.20615
LC69	GØ	A	580.496	1.04141	4.55039
LC69	GØ	A	588.414	0.970248	2.67345
LC69	GØ	A	498.671	1.0747	2.93761
LC69	GØ	A	544.42	0.914197	4.20115
LC69	GØ	A	619.429	1.03321	3.80192
LC69	GØ	A	493.889	1.09985	3.64019
LC69	GØ	A	603.626	0.883112	4.69495
LC69	GØ	A	595.66	1.00409	3.00671
LC69	GØ	A	569.144	0.900735	3.06007
LC69	GØ	A	550.215	0.960947	4.269
LC69	GØ	A	489.771	0.956664	2.18173
LC69	GØ	A	542.527	1.00556	2.4871
LC69	GØ	A	0	0.964925	2.59409
LC69	GØ	A	557.15	0.992889	3.38754
LC69	GØ	A	504.238	0.903672	3.31259
LC69	GØ	A	517.973	0.942162	2.4271
LC69	GØ	A	493.207	0.927843	4.06666
LC69	GØ	A	319.184	0.93182	3.29134
LC69	GØ	A	0	0.949505	2.83972
LC69	GØ	A	421.697	0.998274	3.13976
LC69	GØ	A	649.29	0.981446	3.84358
LC69	GØ	A	534.971	0.960947	4.49072
LC69	GØ	A	606.398	0.972941	4.51731
LC69	GØ	A	596.271	0.968841	3.16738
LC69	GØ	A	582.084	1.00476	4.49026
LC69	GØ	A	524.238	0.980039	3.9897
LC69	GØ	A	585.362	0.949076	4.30105
LC69	GØ	A	560.502	0.926374	4.13881
LC69	GØ	A	562.888	0.98267	4.59537
LC69	GØ	A	0	0.869895	3.64267
LC69	GØ	A	523.103	0.924294	3.12656
LC69	GØ	A	431.877	0.969147	3.45092
LC69	GØ	A	520.266	1.07501	3.45988
LC69	GØ	A	378.818	1.02465	3.8597
LC69	GØ	A	368.885	0.888986	2.40962
LC69	GØ	A	604.259	1.00305	3.68927
LC69	GØ	A	577.725	0.922642	2.00388
LC69	GØ	A	585.444	1.00941	2.94548
LC69	GØ	A	601.912	1.01767	4.04788
LC69	GØ	A	592.558	0.953298	3.31916
LC69	GØ	A	624.867	1.02159	3.56928
LC69	GØ	A	602.388	0.966516	4.24704
LC69	GØ	A	577.137	0.99754	2.18705
LC69	GØ	A	659.048	1.07183	3.07054
LC69	GØ	A	592.629	1.0304	3.59528
LC69	GØ	A	581.158	0.940877	3.96883
LC69	GØ	A	586.503	0.981569	3.32755
LC69	GØ	A	569.481	0.968963	3.67055
LC69	GØ	A	610.334	0.916033	3.03674
LC69	GØ	A	679.433	0.915482	3.4814
LC69	GØ	A	574.593	0.94412	2.97752
LC69	GØ	A	517.382	0.942406	3.13963
LC69	GØ	A	596.602	0.977653	3.27392
LC69	GØ	A	591.818	0.95954	2.97323
LC69	GØ	A	613.917	0.965047	4.03514
LC69	GØ	A	500.828	0.942651	3.42934
LC69	GØ	A	526.457	0.957521	3.39294
LC69	GØ	A	393.825	0.999314	4.61026
LC69	GØ	A	477.529	0.975694	3.04239
LC69	GØ	A	367.671	0.964619	4.05086
LC69	GØ	A	300.734	0.969942	4.12178
LC69	GØ	A	576.153	0.901775	4.48903
LC69	GØ	A	559.818	1.00354	4.06841
LC69	GØ	A	584.009	0.955257	4.04781
LC69	GØ	A	551.115	0.986219	2.54553
LC69	GØ	A	563.161	0.881766	3.23128
LC69	GØ	A	501.379	0.978203	3.3317
LC69	GØ	A	597.11	0.913585	3.43648
LC69	GØ	A	557.93	1.0132	3.05831
LC69	GØ	A	535.843	0.948954	2.64771
LC69	GØ	A	522.515	1.02122	3.58898
LC69	GØ	A	359.667	1.00372	3.18091
LC69	GØ	A	422.601	0.949994	3.53373
LC69	GØ	A	472.322	1.01033	3.58254
LC69	GØ	A	572.4	1.05702	3.69369
LC69	GØ	A	559.437	1.09269	5.29016
LC69	GØ	A	627.197	1.01902	2.65785
LC69	GØ	A	546.207	1.02691	3.84326
LC69	GØ	A	547.084	0.966699	4.63697
LC69	GØ	A	571.543	1.02716	3.20957
LC69	GØ	A	494.747	0.977714	4.72706
LC69	GØ	A	583.071	1.07721	3.23135
LC69	GØ	A	529.489	0.959907	3.11824
LC69	GØ	A	576.171	0.905447	3.23349
LC69	GØ	A	524.727	0.981508	2.89471
LC69	GØ	A	558.351	0.933962	2.55613
LC69	GØ	A	477.394	0.991421	2.99507
LC69	GØ	A	491.407	0.91897	3.47958
LC69	GØ	A	449.061	1.06032	3.107
LC69	GØ	A	531.835	0.974838	3.55823
LC69	GØ	A	436.06	0.953054	3.39014
LC69	GØ	A	423.503	0.969453	2.68489
LC69	GØ	A	314.913	0.918787	2.76952
LC69	GØ	A	377.341	0.921051	2.55872
LC69	GØ	A	535.816	1.09226	3.26742
LC69	GØ	A	476.888	1.00519	3.99139
LC69	GØ	A	432.95	0.982425	2.75476
LC69	GØ	A	499.16	0.954033	4.9751
LC69	GØ	A	561.994	1.03762	4.33771
LC69	GØ	A	573.346	1.0285	3.80679
LC69	GØ	A	601.729	0.951279	5.47307
LC69	GØ	A	579.879	0.976857	3.7854
LC69	GØ	A	538.99	0.965108	3.5399
LC69	GØ	A	624.133	1.02477	4.13368
LC69	GØ	A	580.633	1.02244	4.19803
LC69	GØ	A	481.29	1.02869	3.18682
LC69	GØ	A	528.329	0.947424	3.56388
LC69	GØ	A	0	0.85166	3.50694
LC69	GØ	A	0	0.810539	3.47217
LC69	GØ	A	547.797	0.948097	3.41978
LC69	GØ	A	519.142	0.896023	3.07483
LC69	GØ	A	472.726	0.998152	4.16936
LC69	GØ	A	551.784	0.94773	3.52469
LC69	GØ	A	575.083	0.977224	3.72885
LC69	GØ	A	488.556	0.976306	3.38462
LC69	GØ	A	533.888	0.950851	2.7666
LC69	GØ	A	522.066	0.963334	3.99679
LC69	GØ	A	526.708	0.964925	5.93294
LC69	GØ	A	553.855	0.983282	2.92461
LC69	GØ	A	557.411	0.918848	4.12425
LC69	GØ	A	493.036	0.992583	3.51026
LC69	GØ	A	507.047	0.94259	3.82109
LC69	GØ	A	504.742	0.97288	3.52605
LC69	GØ	A	502.737	0.88097	2.65187
LC69	GØ	A	512.185	0.958316	3.5713
LC69	GØ	A	561.093	1.03217	3.25644
LC69	GØ	A	344.55	0.986342	3.15543
LC69	GØ	A	600.918	1.03162	4.74948
LC69	GØ	A	573.457	1.05396	4.33179
LC69	GØ	A	572.016	0.996683	3.49083
LC69	GØ	A	260.258	0.987321	2.56575
LC69	GØ	A	406.612	0.96162	4.36449
LC69	GØ	A	577.983	1.07452	3.51799
LC69	GØ	A	655.051	1.00311	3.26599
LC69	GØ	A	549.872	1.00904	3.80581
LC69	GØ	A	616.375	0.900429	4.13523
LC69	GØ	A	541.166	0.944548	3.94947
LC69	GØ	A	645.937	1.06718	3.65306
LC69	GØ	A	602.451	1.07005	2.77855
LC69	GØ	A	637.528	0.954645	3.6712
LC69	GØ	A	621.017	0.967678	3.90422
LC69	GØ	A	585.426	0.924294	4.50457
LC69	GØ	A	608.947	0.928394	2.96556
LC69	GØ	A	580.079	0.976979	4.67331
LC69	GØ	A	536.136	0.985485	3.58677
LC69	GØ	A	613.676	1.03321	4.76548
LC69	GØ	A	482.18	0.977041	3.80282
LC69	GØ	A	583.042	0.991421	4.32939
LC69	GØ	A	492.281	1.04435	3.89896
LC69	GØ	A	0	0.79775	3.58404
LC69	GØ	A	0	0.770887	2.43627
LC69	GØ	A	620.802	1.05188	3.67712
LC69	GØ	A	502.331	0.974715	2.98318
LC69	GØ	A	523.856	1.02887	3.17219
LC69	GØ	A	550.458	1.02232	3.48114
LC69	GØ	A	488.892	0.941489	4.75845
LC69	GØ	A	517.509	0.992767	3.19846
LC69	GØ	A	507.558	0.961743	3.08256
LC69	GØ	A	516.813	0.972818	3.52716
LC69	GØ	A	497.132	0.987076	3.34172
LC69	GØ	A	464.605	0.982487	4.99948
LC69	GØ	A	466.319	0.984812	3.13203
LC69	GØ	A	577.911	1.00972	3.88823
LC69	GØ	A	573.473	0.993746	4.94513
LC69	GØ	A	608.952	0.973247	4.3175
LC69	GØ	A	619.645	1.03817	3.99249
LC69	GØ	A	530.798	0.95391	3.67257
LC69	GØ	A	563.057	0.971901	4.15402
LC69	GØ	A	581.155	1.03762	2.50393
LC69	GØ	A	611.81	0.958622	4.07368
LC69	GØ	A	594.183	0.930352	2.54657
LC69	GØ	A	654.771	0.933656	3.98424
LC69	GØ	A	598.681	0.874912	3.48563
LC69	GØ	A	571.882	1.04141	3.84618
LC69	GØ	A	526.441	0.948526	3.13697
LC69	GØ	A	561.699	0.928822	2.96595
LC69	GØ	A	606.787	0.916155	3.15133
LC69	GØ	A	553.812	0.916584	3.27873
LC69	GØ	A	563.172	0.964741	3.57357
LC69	GØ	A	510.253	0.997846	4.38354
LC69	GØ	A	528.314	1.04845	4.7996
LC69	GØ	A	560.119	0.997846	4.22351
LC69	GØ	A	586.694	1.00305	3.87705
LC69	GØ	A	324.979	0.944548	3.95824
LC69	GØ	A	570.793	0.965598	5.25798
LC69	GØ	A	678.626	0.99191	4.78517
LC69	GØ	A	630.265	0.962477	3.15451
LC69	GØ	A	521.492	0.97086	3.83383
LC69	GØ	A	555.836	0.914075	3.1913
LC69	GØ	A	557.115	0.974593	3.46996
LC69	GØ	A	567.153	0.916706	3.38994
LC69	GØ	A	516.846	0.929985	3.29368
LC69	GØ	A	0	0.918664	3.12617
LC69	GØ	A	587.512	0.964129	4.17671
LC69	GØ	A	0	0.953298	3.57136
LC69	GØ	A	504.85	0.971044	3.19222
LC69	GØ	A	512.206	0.981385	4.34961
LC69	GØ	A	621.543	0.969086	4.56606
LC69	GØ	A	525.603	0.926986	3.79502
LC69	GØ	A	519.736	1.00213	2.92409
LC69	GØ	A	540.422	0.966149	4.3899
LC69	GØ	A	530.959	0.943385	2.27637
LC69	GØ	A	483.323	0.965414	3.82278
LC69	GØ	A	466.713	1.03401	3.05312
LC69	GØ	A	540.893	0.932861	3.55771
LC69	GØ	A	595.134	1.01406	5.04263
LC69	GØ	A	570.429	0.983772	4.75741
LC69	GØ	A	577.795	0.955991	4.83301
LC69	GØ	A	494.759	1.00837	2.91987
LC69	GØ	A	567.168	0.992033	2.44016
LC69	GØ	A	542.827	0.950973	3.66308
LC69	GØ	A	568.496	1.02514	3.67926
LC69	GØ	A	615.055	0.978632	3.42628
LC69	GØ	A	573.076	0.917502	4.45139
LC69	GØ	A	508.099	0.973553	3.12786
LC69	GØ	A	488.114	1.01553	2.68235
LC69	GØ	A	0	0.934696	3.64267
LC69	GØ	A	624.212	1.01437	4.08688
LC69	GØ	A	0	0.973124	2.76458
LC69	GØ	A	556.132	1.00427	3.40762
LC69	GØ	A	519.295	0.939102	2.97544
LC69	GØ	A	554.576	0.918542	3.45267
LC69	GØ	A	0	0.86194	2.4659
LC69	GØ	A	514.366	0.941489	4.02441
LC69	GØ	A	0	0.86861	3.90429
LC69	GØ	A	550.479	0.928271	2.70667
LC69	GØ	A	549.426	0.89223	3.66535
LC69	GØ	A	493.612	1.08186	2.97797
LC69	GØ	A	550.495	0.9842	3.85886
LC69	GØ	A	486.619	0.923682	4.00244
LC69	GØ	A	529.649	1.01688	3.61218
LC69	GØ	A	0	0.924049	1.17565
LC69	GØ	A	637.901	1.0036	2.66155
LC69	GØ	A	585.314	0.961865	3.46255
LC69	GØ	A	389.089	0.921112	3.13658
LC69	GØ	A	462.472	0.938123	2.49372
LC69	GØ	A	363.276	0.971289	3.75264
LC69	GØ	A	497.747	0.994358	4.47629
LC69	GØ	A	482.833	1.00543	3.67725
LC69	GØ	A	529.233	0.955318	3.81264
LC69	GØ	A	496.614	0.963946	3.36096
LC69	GØ	A	583.634	0.995337	4.02038
LC69	GØ	A	551.337	0.963517	4.81956
LC69	GØ	A	565.623	0.912117	5.02476
LC69	GØ	A	610.851	0.903122	3.06209
LC69	GØ	A	495.587	1.00598	3.62713
LC69	GØ	A	482.043	1.02856	2.55834
LC69	GØ	A	549.127	1.04356	3.93211
LC69	GØ	A	516.476	0.946873	4.21765
LC69	GØ	A	549.521	0.929495	3.28686
LC69	GØ	A	511.885	0.984934	2.82841
LC69	GØ	A	533.449	0.978938	2.85662
LC69	GØ	A	535.387	0.987872	3.28985
LC69	GØ	A	518.652	0.962783	4.51113
LC69	GØ	A	523.575	0.981936	3.17304
LC69	GØ	A	463.04	1.02318	4.98062
LC69	GØ	A	470.078	1.00825	3.13137
LC69	GØ	A	444.363	1.0091	3.72859
LC69	GØ	A	444.787	0.984934	2.9651
LC69	GØ	A	409.545	1.02783	5.00038
LC69	GØ	A	314.778	1.0471	4.57431
LC69	GØ	A	485.679	1.04031	3.15374
LC69	GØ	A	556	1.03499	2.73208
LC69	GØ	A	591.702	0.964007	3.28438
LC69	GØ	A	575.52	1.06926	2.93189
LC69	GØ	A	509.539	0.968168	4.24599
LC69	GØ	A	596.045	0.957949	2.89432
LC69	GØ	A	578.048	0.956725	2.92175
LC69	GØ	A	568.159	1.02832	4.95014
LC69	GØ	A	480.184	0.904284	3.89097
LC69	GØ	A	581.401	0.906304	3.32072
LC69	GØ	A	526.447	0.931453	3.54621
LC69	GØ	A	573.409	0.960886	4.03266
LC69	GØ	A	0	0.742066	3.72288
LC69	GØ	A	526.792	0.928455	4.47311
LC69	GØ	A	547.616	0.930046	2.92312
LC69	GØ	A	553.025	0.957092	4.02519
LC69	GØ	A	591.151	1.0501	3.55726
LC69	GØ	A	551.334	0.985179	3.40619
LC69	GØ	A	514.176	0.98781	3.49531
LC69	GØ	A	529.878	0.957827	2.89536
LC69	GØ	A	530.366	0.915605	3.87296
LC69	GØ	A	512.843	0.975083	3.16556
LC69	GØ	A	496.029	1.01902	2.31198
LC69	GØ	A	509.749	0.953298	3.47711
LC69	GØ	A	411.205	1.01877	5.13461
LC69	GØ	A	617.266	1.10542	3.91365
LC69	GØ	A	590.651	1.0173	4.35025
LC69	GØ	A	562.462	0.995949	3.57409
LC69	GØ	A	587.154	0.969514	3.61627
LC69	GØ	A	576.164	0.992216	3.86431
LC69	GØ	A	607.74	0.970983	3.92743
LC69	GØ	A	570.506	0.947118	4.12789
LC69	GØ	A	601.368	1.01951	3.17037
LC69	GØ	A	572.075	0.99962	4.27681
LC69	GØ	A	620.792	1.06044	3.70871
LC69	GØ	A	560.732	1.07446	3.15146
LC69	GØ	A	540.73	0.994786	2.61586
LC69	GØ	A	403.427	0.949382	2.31231
LC69	GØ	A	549.373	0.925089	3.83792
LC69	GØ	A	590.533	0.987504	4.04443
LC69	GØ	A	555.941	1.05102	3.55179
LC69	GØ	A	566.999	0.925395	3.52794
LC69	GØ	A	555.02	0.98316	3.70337
LC69	GØ	A	492.048	0.920255	3.85983
LC69	GØ	A	519.941	1.01712	2.97479
LC69	GØ	A	578.488	0.978142	4.1654
LC69	GØ	A	476.899	0.97239	4.39127
LC69	GØ	A	631.771	1.03376	4.41383
LC69	GØ	A	600.931	1.00396	3.3724
LC69	GØ	A	574.286	0.955746	2.09183
LC69	GØ	A	548.182	0.984506	4.06217
LC69	GØ	A	439.038	0.933962	2.91993
LC69	GØ	A	539.014	0.908568	2.48456
LC69	GØ	A	553.339	0.964864	3.29791
LC69	GØ	A	555.253	1.00843	3.55446
LC69	GØ	A	502.058	0.9801	4.02337
LC69	GØ	A	350.682	0.963946	4.14797
LC69	GØ	A	432.65	0.934452	4.13543
LC69	GØ	A	579.34	1.01027	3.55127
LC69	GØ	A	549.925	1.0356	3.11018
LC69	GØ	A	554.168	0.902632	3.55414
LC69	GØ	A	533.758	0.996499	3.09108
LC69	GØ	A	624.29	0.965414	2.42443
LC69	GØ	A	590.505	0.988545	3.40951
LC69	GØ	A	576.415	0.929801	4.07907
LC69	GØ	A	623.597	0.97288	3.39943
LC69	GØ	A	550.612	0.926925	4.11099
LC69	GØ	A	0	0.779515	3.06455
LC69	GØ	A	547.904	0.922397	2.69821
LC69	GØ	A	604.257	1.01822	4.30131
LC69	GØ	A	570.226	1.00647	3.60867
LC69	GØ	A	575.233	0.951463	2.68918
LC69	GØ	A	587.606	1.02091	3.82103
LC69	GØ	A	527.408	0.993991	2.55112
LC69	GØ	A	568.402	0.955563	4.1741
LC69	GØ	A	583.089	0.979244	3.88362
LC69	GØ	A	500.839	0.948648	3.79581
LC69	GØ	A	509.86	0.974777	3.76805
LC69	GØ	A	370.943	0.961743	3.27502
LC69	GØ	A	573.26	1.07788	3.89857
LC69	GØ	A	557.258	1.00751	3.30206
LC69	GØ	A	576.484	0.949137	4.54467
LC69	GØ	A	365.241	1.01265	3.26852
LC69	GØ	A	552.198	0.946323	3.05331
LC69	GØ	A	623.854	1.0151	3.59034
LC69	GØ	A	585.047	0.934084	3.02497
LC69	GØ	A	608.105	1.01883	3.58124
LC69	GØ	A	618.978	0.952197	3.31786
LC69	GØ	A	553.113	0.98469	3.31975
LC69	GØ	A	477.902	1.00115	3.55478
LC69	GØ	A	565.317	1.00091	3.04454
LC69	GØ	A	626.408	1.04967	2.71005
LC69	GØ	A	656.16	0.97649	4.35006
LC69	GØ	A	560.979	0.942039	4.03033
LC69	GØ	A	594.367	1.00219	3.81492
LC69	GØ	A	0	0.909241	3.17161
LC69	GØ	A	0	0.959356	3.7375
LC69	GØ	A	568.411	0.930658	3.97566
LC69	GØ	A	565.231	0.91689	3.66652
LC69	GØ	A	581.043	0.972329	4.017
LC69	GØ	A	0	0.789612	1.82208
LC69	GØ	A	0	0.782881	1.84249
LC69	GØ	A	0	0.713612	2.87774
LC69	GØ	A	0	0.661539	1.59692
LC69	GØ	A	0	0.855331	2.98278
LC69	GØ	A	552.204	0.990625	3.83656
LC69	GØ	A	511.453	1.0222	3.00638
LC69	GØ	A	500.166	0.90098	2.59675
LC69	GØ	A	381.932	1.03181	2.88593
LC69	GØ	A	0	0.79108	3.21061
LC69	GØ	A	594.991	0.976184	3.28556
LC69	GØ	A	614.72	0.949749	3.7481
LC69	GØ	A	516.745	0.990319	3.12149
LC69	GØ	A	571.856	0.965781	3.37233
LC69	GØ	A	494.418	0.945772	4.96262
LC69	GØ	A	0	0.875402	3.41848
LC69	GØ	A	561.008	1.03976	2.74144
LC69	GØ	A	563.359	0.925028	3.37909
LC69	GØ	A	465.738	0.956786	2.41079
LC69	GØ	A	520.551	0.930474	3.20015
LC69	GØ	A	553.032	1.01473	3.32508
LC69	GØ	A	486.448	0.96162	2.84271
LC69	GØ	A	497.781	0.957092	3.68602
LC69	GØ	A	284.651	0.933228	2.53812
LC69	GØ	A	560.627	0.976368	3.66093
LC69	GØ	A	563.242	1.03468	2.99208
LC69	GØ	A	581.753	0.986709	3.45
LC69	GØ	A	501.924	0.999437	5.04458
LC69	GØ	A	549.901	1.04545	2.23801
LC69	GØ	A	594.013	0.980223	3.88252
LC69	GØ	A	615.907	0.930291	3.77448
LC69	GØ	A	549.28	0.972451	2.77284
LC69	GØ	A	558.934	0.921601	4.40999
LC69	GØ	A	626.65	0.945282	3.4686
LC69	GØ	A	522.744	1.00862	4.1494
LC69	GØ	A	550.217	0.931025	3.17441
LC69	GØ	A	478.989	0.989157	4.22168
LC69	GØ	A	578.54	0.976	2.94223
LC69	GØ	A	581.679	0.990503	3.41386
LC69	GØ	A	536.088	0.920745	3.99724
LC69	GØ	A	475.259	0.989952	3.6463
LC69	GØ	A	522.025	0.995643	4.01141
LC69	GØ	A	522.658	0.979182	3.18175
LC69	GØ	A	411.188	1.00549	3.76766
LC69	GØ	A	502.86	0.953666	3.89051
LC69	GØ	A	505.693	0.988728	4.21336
LC69	GØ	A	613.729	0.955685	3.10583
LC69	GØ	A	572.59	1.00384	3.84657
LC69	GØ	A	566.609	0.998029	4.21694
LC69	GØ	A	579.268	1.00078	3.12527
LC69	GØ	A	609.554	0.956052	4.4902
LC69	GØ	A	573.627	0.972145	3.23245
LC69	GØ	A	608.631	0.956052	3.24337
LC69	GØ	A	597.473	1.06044	2.67969
LC69	GØ	A	583.937	1.03609	3.49596
LC69	GØ	A	594.236	0.991053	3.01216
LC69	GØ	A	558.208	0.959724	2.68918
LC69	GØ	A	602.283	0.966822	3.23817
LC69	GØ	A	460.47	0.936287	4.94286
LC69	GØ	A	565.442	1.03217	2.65883
LC69	GØ	A	535.17	0.974593	4.71621
LC69	GØ	A	491.192	0.996622	3.44877
LC69	GØ	A	464.303	1.00384	4.20179
LC69	GØ	A	566.711	0.959112	3.27632
LC69	GØ	A	601.296	1.03731	2.93566
LC69	GØ	A	545.61	0.93078	3.89233
LC69	GØ	A	603.31	0.973798	3.7763
LC69	GØ	A	572.111	1.04111	2.6271
LC69	GØ	A	658.792	1.00868	2.90017
LC69	GØ	A	620	1.03725	2.86084
LC69	GØ	A	545.521	0.950667	3.96832
LC69	GØ	A	581.335	0.975144	2.45329
LC69	GØ	A	542.798	1.04007	4.14557
LC69	GØ	A	567.683	0.978081	3.39911
LC69	GØ	A	531.631	0.927415	3.76038
LC69	GØ	A	0	0.961743	3.85996
LC69	GØ	A	534.292	1.01088	2.85649
LC69	GØ	A	415.341	0.957276	3.40178
LC69	GØ	A	517.034	0.952381	3.50558
LC69	GØ	A	507.349	0.982058	2.64479
AV51	G20	A	454.812	1.02275	2.28351
AV51	G20	A	582.117	0.940326	4.47011
AV51	G20	A	0	0.92564	3.74524
AV51	G20	A	614.635	1.12402	2.12511
AV51	G20	A	379.608	0.99858	2.78317
AV51	G20	A	314.473	0.986954	2.38842
AV51	G20	A	382.24	1.05408	2.24965
AV51	G20	A	597.773	1.03829	2.17165
AV51	G20	A	329.658	0.984016	3.64878
AV51	G20	A	633.271	1.01229	2.67429
AV51	G20	A	624.823	1.06779	2.87176
AV51	G20	A	542.528	0.901225	2.83816
AV51	G20	A	615.213	0.918175	2.60052
AV51	G20	A	682.81	0.994541	3.71839
AV51	G20	A	740.386	1.01938	3.09185
AV51	G20	A	647.685	0.981814	2.56419
AV51	G20	A	557.205	0.990992	3.15855
AV51	G20	A	656.66	0.964313	2.86409
AV51	G20	A	627.689	1.0058	2.87073
AV51	G20	A	530.896	1.03107	2.71388
AV51	G20	A	527.779	1.06742	2.44732
AV51	G20	A	606.074	0.999008	4.0233
AV51	G20	A	480.624	0.980406	3.10206
AV51	G20	A	380.591	1.0758	4.0521
AV51	G20	A	617.45	0.988239	4.7164
AV51	G20	A	597.791	0.975083	3.44272
AV51	G20	A	335.7	0.954583	2.6054
AV51	G20	A	608.444	0.984934	3.44376
AV51	G20	A	593.926	0.952748	3.3282
AV51	G20	A	713.825	1.00874	4.08376
AV51	G20	A	505.555	0.995031	3.24311
AV51	G20	A	642.564	1.01957	2.743
AV51	G20	A	632.067	0.959968	2.83991
AV51	G20	A	637.3	1.01896	3.05611
AV51	G20	A	597.646	0.95134	2.46428
AV51	G20	A	756.543	0.995276	2.10763
AV51	G20	A	626.844	0.968902	3.24253
AV51	G20	A	683.604	0.988606	3.11018
AV51	G20	A	705.858	0.974777	2.83329
AV51	G20	A	672.983	1.06815	3.95077
AV51	G20	A	534.289	0.992216	4.19952
AV51	G20	A	539.059	0.927782	3.48095
AV51	G20	A	545.307	1.01412	3.04798
AV51	G20	A	555.283	0.976735	3.61842
AV51	G20	A	0	0.774559	2.85012
AV51	G20	A	558.367	1.01106	2.47058
AV51	G20	A	601.635	0.964007	3.52411
AV51	G20	A	619.024	1.00458	2.6169
AV51	G20	A	602.026	1.01339	3.69031
AV51	G20	A	583.736	1.10511	3.35855
AV51	G20	A	603.362	0.992706	4.36865
AV51	G20	A	647.87	0.996194	4.73025
AV51	G20	A	570.998	1.00421	3.31656
AV51	G20	A	673.326	0.980345	3.44305
AV51	G20	A	629.572	1.00201	4.24261
AV51	G20	A	688.577	1.01192	4.20998
AV51	G20	A	628.011	1.0006	4.37678
AV51	G20	A	578.508	0.979305	3.75785
AV51	G20	A	597.042	1.03376	3.64046
AV51	G20	A	581.164	0.934023	3.92626
AV51	G20	A	541.91	0.991788	3.8075
AV51	G20	A	558.915	0.954216	3.10264
AV51	G20	A	640.668	0.973981	3.34405
AV51	G20	A	494.679	0.898593	3.38273
AV51	G20	A	319.226	0.956297	2.52752
AV51	G20	A	0	0.973063	2.26402
AV51	G20	A	0	0.961437	2.29379
AV51	G20	A	672.662	0.996989	3.17174
AV51	G20	A	630.083	1.03481	3.84144
AV51	G20	A	522.667	0.970065	2.76926
AV51	G20	A	607.955	1.03738	3.23375
AV51	G20	A	644.923	1.06828	2.61722
AV51	G20	A	565.378	0.906365	2.98786
AV51	G20	A	561.458	1.01345	1.86322
AV51	G20	A	647.045	0.952442	3.94348
AV51	G20	A	620.535	1.02208	3.68791
AV51	G20	A	630.01	1.01443	3.3724
AV51	G20	A	693.62	1.02997	2.80436
AV51	G20	A	594.118	0.999253	3.75375
AV51	G20	A	560.751	0.984139	3.57598
AV51	G20	A	598.93	0.998702	3.98762
AV51	G20	A	481.886	0.936899	4.24782
AV51	G20	A	537.087	0.946935	3.87062
AV51	G20	A	625.084	0.99191	3.2875
AV51	G20	A	434.154	0.928332	3.69024
AV51	G20	A	326.352	1.07023	2.90959
AV51	G20	A	661.148	1.0121	3.01022
AV51	G20	A	540.479	0.957949	3.18689
AV51	G20	A	584.826	1.00917	3.94972
AV51	G20	A	651.606	0.963273	4.212
AV51	G20	A	582.757	0.914442	3.28776
AV51	G20	A	553.266	0.958316	4.02916
AV51	G20	A	547.154	0.941917	3.79054
AV51	G20	A	580.178	0.96162	3.26222
AV51	G20	A	547.875	0.93182	3.31325
AV51	G20	A	608.765	1.02544	3.27743
AV51	G20	A	581.498	0.967984	3.71572
AV51	G20	A	633.642	0.983527	3.34334
AV51	G20	A	650.75	0.944303	2.59571
AV51	G20	A	568.235	0.963089	3.91931
AV51	G20	A	456.505	1.00396	4.425
AV51	G20	A	614.521	0.932187	3.38201
AV51	G20	A	709.808	1.02501	3.96227
AV51	G20	A	503.625	0.911811	3.06468
AV51	G20	A	552.884	1.07164	3.35198
AV51	G20	A	639.615	1.03456	2.99812
AV51	G20	A	596.547	0.987382	2.32011
AV51	G20	A	535.695	0.984322	3.36414
AV51	G20	A	587.216	1.05377	3.17089
AV51	G20	A	552.287	0.94773	3.28432
AV51	G20	A	673.637	0.996194	2.59798
AV51	G20	A	492.198	0.983527	2.41182
AV51	G20	A	651.959	1.01626	2.4516
AV51	G20	A	491.341	0.931208	4.2703
AV51	G20	A	674.534	0.956174	3.09719
AV51	G20	A	522.664	0.985546	2.98623
AV51	G20	A	574.734	1.00323	2.40955
AV51	G20	A	622.895	0.952687	2.41397
AV51	G20	A	573.73	0.950239	3.48875
AV51	G20	A	585.837	0.93078	2.60884
AV51	G20	A	460.783	1.00739	2.47722
AV51	G20	A	531.233	0.925824	3.4396
AV51	G20	A	481.067	0.967128	3.51026
AV51	G20	A	500.471	0.892658	2.76087
AV51	G20	A	555.655	0.948342	3.15244
AV51	G20	A	728.561	1.00207	3.57396
AV51	G20	A	615.964	0.920439	4.20244
AV51	G20	A	647.671	0.944181	2.73273
AV51	G20	A	712.594	0.99552	4.35506
AV51	G20	A	584.055	0.904896	3.35237
AV51	G20	A	703.866	0.982425	3.59522
AV51	G20	A	602.81	0.985852	3.88641
AV51	G20	A	652.598	1.0091	3.27964
AV51	G20	A	544.686	0.986403	3.48881
AV51	G20	A	584.746	0.997601	3.6649
AV51	G20	A	678.508	1.00678	3.64598
AV51	G20	A	606.633	0.970004	3.81894
AV51	G20	A	605.112	0.996989	3.03777
AV51	G20	A	580.699	0.957276	3.67198
AV51	G20	A	603.604	0.95593	4.20413
AV51	G20	A	503.381	0.971962	2.98376
AV51	G20	A	670.631	0.991971	2.77238
AV51	G20	A	580.161	0.905814	3.23349
AV51	G20	A	515.727	0.981079	2.57114
AV51	G20	A	783.47	0.98469	4.44346
AV51	G20	A	525.984	0.983527	2.69048
AV51	G20	A	543.413	0.912484	4.52218
AV51	G20	A	494.786	0.962783	5.64935
AV51	G20	A	496.399	0.969759	3.8066
AV51	G20	A	535.24	1.00598	3.43778
AV51	G20	A	354.036	0.982731	2.81339
AV51	G20	A	577.34	0.988973	2.50354
AV51	G20	A	490.251	0.877238	2.15897
AV51	G20	A	715.643	1.01994	3.44188
AV51	G20	A	618.541	0.952687	3.88648
AV51	G20	A	639.77	0.956236	3.61543
AV51	G20	A	648.41	0.971901	3.25696
AV51	G20	A	586.379	0.970738	3.1098
AV51	G20	A	498.105	0.912729	2.50646
AV51	G20	A	617.235	0.967128	3.65807
AV51	G20	A	638.867	1.00623	3.17408
AV51	G20	A	427.908	0.864204	4.11534
AV51	G20	A	611.301	0.997601	3.85294
AV51	G20	A	503.35	0.98934	2.89854
AV51	G20	A	0	0.950973	3.54939
AV51	G20	A	547.046	0.947485	3.82005
AV51	G20	A	484.413	1.01602	3.52229
AV51	G20	A	457.699	1.06956	2.65544
AV51	G20	A	661.25	0.920378	2.17301
AV51	G20	A	604.474	1.00311	3.80731
AV51	G20	A	602.561	1.01155	2.81567
AV51	G20	A	564.003	1.0211	4.71842
AV51	G20	A	686.798	0.892413	1.63468
AV51	G20	A	543.254	0.979427	3.55082
AV51	G20	A	660.624	0.971839	2.74358
AV51	G20	A	563.853	0.880114	2.98623
AV51	G20	A	640.704	1.0296	3.88759
AV51	G20	A	558.065	0.88813	3.57624
AV51	G20	A	550.579	0.944854	3.23576
AV51	G20	A	545.897	1.00274	3.22133
AV51	G20	A	587.524	1.0069	4.30891
AV51	G20	A	618.948	0.989707	3.69096
AV51	G20	A	564.496	0.912239	3.4736
AV51	G20	A	542.173	0.881582	4.30436
AV51	G20	A	661.401	0.971411	3.73568
AV51	G20	A	710.254	0.967801	2.62385
AV51	G20	A	515.221	1.01272	2.26817
AV51	G20	A	583.717	0.99448	2.28755
AV51	G20	A	585.655	0.907221	2.67871
AV51	G20	A	530.058	0.946751	3.70578
AV51	G20	A	538.469	1.02043	3.20521
AV51	G20	A	530.259	0.975205	3.95356
AV51	G20	A	631.114	1.04619	2.81866
AV51	G20	A	702.003	0.96107	2.30087
AV51	G20	A	586.431	0.921051	4.48663
AV51	G20	A	555.235	0.923254	3.89616
AV51	G20	A	533.024	0.901102	4.34961
AV51	G20	A	408.556	0.926007	4.4692
AV51	G20	A	576.796	0.994235	4.31457
AV51	G20	A	538.43	0.933289	3.40314
AV51	G20	A	404.203	0.924661	3.05201
AV51	G20	A	593.91	0.917685	2.82087
AV51	G20	A	336.892	0.958867	3.56376
AV51	G20	A	506.138	1.07066	2.27578
AV51	G20	A	350.606	0.834649	2.42586
AV51	G20	A	544.716	0.978632	3.34497
AV51	G20	A	566.527	0.999375	3.96936
AV51	G20	A	356.926	0.954645	3.35114
AV51	G20	A	583.998	0.942529	3.01398
AV51	G20	A	647.168	0.961498	3.70207
AV51	G20	A	720.917	0.944793	2.65668
AV51	G20	A	719.946	0.97086	2.79734
AV51	G20	A	566.24	0.942529	2.93013
AV51	G20	A	714.508	0.952075	2.93547
AV51	G20	A	640.453	0.986036	2.65343
AV51	G20	A	651.47	0.977591	2.65798
AV51	G20	A	576.144	1.00917	3.65216
AV51	G20	A	720.949	0.992094	3.46671
AV51	G20	A	632.208	1.02397	3.00502
AV51	G20	A	687.819	1.02434	3.23928
AV51	G20	A	586.888	0.943569	2.3179
AV51	G20	A	614.316	0.967434	4.46225
AV51	G20	A	578.211	1.01394	2.16684
AV51	G20	A	731.583	1.03474	2.59305
AV51	G20	A	678.948	0.998458	3.39378
AV51	G20	A	561.693	0.980406	2.88457
AV51	G20	A	549.155	1.02055	3.13378
AV51	G20	A	612.329	0.997784	3.4565
AV51	G20	A	536.198	0.898838	3.97514
AV51	G20	A	394.93	0.965781	3.50805
AV51	G20	A	610.392	0.956174	3.3945
AV51	G20	A	672.707	1.03401	2.68158
AV51	G20	A	548.286	0.94467	3.25104
AV51	G20	A	609.44	0.971472	3.27399
AV51	G20	A	652.024	0.961315	3.53723
AV51	G20	A	531.907	1.0077	3.84462
AV51	G20	A	573.675	1.05445	3.97345
AV51	G20	A	610.249	0.912178	4.8388
AV51	G20	A	539.609	0.9421	2.54696
AV51	G20	A	690.492	0.982609	4.25672
AV51	G20	A	565.585	0.944793	4.12425
AV51	G20	A	581.471	0.990747	2.61735
AV51	G20	A	752.481	0.986464	2.52324
AV51	G20	A	703.673	0.964252	2.64193
AV51	G20	A	500.514	0.945038	3.45917
AV51	G20	A	579.02	1.0744	3.33379
AV51	G20	A	490.122	0.979121	2.84979
AV51	G20	A	522.81	0.942529	3.50688
AV51	G20	A	588.951	0.976918	1.66348
AV51	G20	A	529.898	0.941427	3.74946
AV51	G20	A	573.166	0.920806	2.65155
AV51	G20	A	623.091	0.949015	3.08678
AV51	G20	A	542.234	0.850558	3.33177
AV51	G20	A	552.321	0.911994	3.38845
AV51	G20	A	618.75	1.00966	2.83504
AV51	G20	A	431.231	1.03407	3.46586
AV51	G20	A	411.495	0.999987	3.10044
AV51	G20	A	402.428	0.881154	4.45549
AV51	G20	A	611.772	1.04821	2.83075
AV51	G20	A	556.887	0.994786	3.45995
AV51	G20	A	565.858	0.946812	2.97986
AV51	G20	A	522.985	0.989462	4.1444
AV51	G20	A	615.304	0.968596	4.19536
AV51	G20	A	519.356	0.931698	3.81537
AV51	G20	A	598.781	1.01449	2.92077
AV51	G20	A	553.797	0.928638	2.83257
AV51	G20	A	478.952	0.922825	3.69694
AV51	G20	A	460.46	0.925946	3.51455
AV51	G20	A	704.657	1.03205	2.29392
AV51	G20	A	564.634	0.938674	2.82412
AV51	G20	A	532.258	0.9462	2.79325
AV51	G20	A	528.339	0.959724	4.42319
AV51	G20	A	559.805	0.974287	3.25123
AV51	G20	A	549.781	0.922519	4.81904
AV51	G20	A	572.09	0.968413	3.28243
AV51	G20	A	622.52	1.01663	4.1587
AV51	G20	A	617.657	0.942468	2.65454
AV51	G20	A	630.056	0.940387	4.15304
AV51	G20	A	621.448	0.972451	3.31129
AV51	G20	A	597.628	1.00678	2.79155
AV51	G20	A	555.828	0.961804	3.9102
AV51	G20	A	582.971	0.971717	3.18786
AV51	G20	A	609.768	0.939469	3.96428
AV51	G20	A	576.777	0.942774	3.71137
AV51	G20	A	568.203	0.944242	2.509
AV51	G20	A	534.062	0.914197	3.61706
AV51	G20	A	556.61	0.980651	3.4023
AV51	G20	A	555.545	0.92258	3.43831
AV51	G20	A	565.871	0.9462	2.72233
AV51	G20	A	496.866	0.948464	2.7833
AV51	G20	A	0	0.894555	2.67365
AV51	G20	A	548.711	0.967801	4.27609
AV51	G20	A	501.924	0.908323	3.70961
AV51	G20	A	653.944	1.05469	3.13346
AV51	G20	A	562.117	0.964068	4.30839
AV51	G20	A	569.458	0.92307	3.87283
AV51	G20	A	489.365	0.991482	2.83666
AV51	G20	A	312.691	0.90661	2.59116
AV51	G20	A	581.159	0.996928	3.26059
AV51	G20	A	492.493	0.898471	3.49479
AV51	G20	A	642.584	1.03015	2.96367
AV51	G20	A	524.65	1.0271	3.43271
AV51	G20	A	526.466	1.00445	3.06637
AV51	G20	A	552.186	0.95183	4.66635
AV51	G20	A	434.763	0.930719	2.59642
AV51	G20	A	593.012	0.94155	2.83036
AV51	G20	A	576.693	0.915727	4.42507
AV51	G20	A	565.527	0.934329	2.64257
AV51	G20	A	691.929	0.962232	3.8638
AV51	G20	A	0	0.908751	3.35329
AV51	G20	A	780.767	1.10095	2.7311
AV51	G20	A	513.977	0.934758	3.69493
AV51	G20	A	613.313	0.955195	2.5378
AV51	G20	A	724.937	1.00005	3.22939
AV51	G20	A	596.632	0.942468	4.61545
AV51	G20	A	698.282	0.965904	2.27929
AV51	G20	A	610.109	0.939041	4.11925
AV51	G20	A	665.018	1.02018	2.89854
AV51	G20	A	331.862	0.945221	1.99647
AV51	G20	A	599.877	0.975511	3.08126
AV51	G20	A	555.304	0.935798	3.12988
[truncated: 8,979 more rows]

## Sheet: Fig1D
Operon	Guide	Concentration (%)	Diameter (μm)	Length (μm)
mrdAB	R20	12.0651	1.76456	2.79001
mrdAB	R20	9.55354	1.79825	2.9451
mrdAB	R20	9.79694	1.79496	3.05708
mrdAB	R18	26.8319	1.26023	3.48057
mrdAB	R18	19.207	1.2412	3.2065
mrdAB	R18	23.0538	1.26477	3.58854
mrdAB	R11	36.4141	1.10141	3.22392
mrdAB	R11	32.3731	1.09033	3.18122
mrdAB	R11	35.3363	1.08224	3.19013
mrdAB	RØ	100.818	1.00558	3.44999
mrdAB	RØ	95.8902	1.00979	3.42736
mrdAB	RØ	100	1.01136	3.31636
mreBCD	G14	13.0136	1.92068	2.89761
mreBCD	GØ	100	1.00967	3.44382
mreBCD	G10	40.9082	1.21534	3.12499
mreBCD	G14	13.1703	1.8054	2.81889
mreBCD	G10	39.3788	1.2163	3.26454
mreBCD	GØ	103.735	1.02218	3.36814
mreBCD	G10	39.1449	1.23415	3.12553
mreBCD	G14	12.9761	1.74855	2.7703
mreBCD	GØ	99.5949	0.994887	3.38175

## Sheet: Fig1E
Replicate	Time (h)	OD_600
A	0.0380833	0
A	0.0761389	0.000292798
A	0.114194	0.00146397
A	0.152278	0.000585574
A	0.190389	0.000585574
A	0.228444	-0.000878371
A	0.2665	0.00146397
A	0.304583	0.000878371
A	0.342667	-0.000585595
A	0.380722	0.000292798
A	0.418778	0.00204954
A	0.456833	0.00117117
A	0.494917	0.00292793
A	0.532972	0.00322071
A	0.571028	0.00351351
A	0.609083	0.00585585
A	0.647139	0.00614864
A	0.685194	0.00731981
A	0.72325	0.00497747
A	0.761306	0.00702701
A	0.799389	0.00936937
A	0.837444	0.00556307
A	0.8755	0.0108333
A	0.913556	0.00731981
A	0.951611	0.00936937
A	0.989667	0.00878378
A	1.02772	0.0102477
A	1.06578	0.0120045
A	1.10386	0.0122973
A	1.14192	0.0125901
A	1.17997	0.00995495
A	1.21803	0.0152252
A	1.25608	0.015518
A	1.29414	0.0172748
A	1.33222	0.0152252
A	1.37031	0.016982
A	1.40836	0.0187387
A	1.44642	0.0213739
A	1.48447	0.0228378
A	1.52253	0.0228378
A	1.56058	0.025473
A	1.59867	0.0260586
A	1.63672	0.0272297
A	1.67478	0.0301577
A	1.71283	0.031036
A	1.75089	0.0322072
A	1.78894	0.0363063
A	1.82703	0.0360135
A	1.86508	0.0398198
A	1.90314	0.0433333
A	1.94119	0.0453829
A	1.97925	0.0488964
A	2.01731	0.0500676
A	2.05536	0.0538739
A	2.09342	0.057973
A	2.13147	0.0606081
A	2.16956	0.0652928
A	2.20761	0.0699775
A	2.24567	0.073491
A	2.28372	0.0799324
A	2.32178	0.0849099
A	2.35983	0.0907658
A	2.39789	0.0969144
A	2.43597	0.102185
A	2.47403	0.108041
A	2.51208	0.114482
A	2.55014	0.12268
A	2.58819	0.13
A	2.62625	0.136441
A	2.66431	0.144054
A	2.70236	0.152838
A	2.74044	0.161329
A	2.7785	0.173041
A	2.81656	0.178311
A	2.85461	0.187973
A	2.89267	0.195293
A	2.93072	0.206419
A	2.96881	0.214617
A	3.00686	0.223986
A	3.15839	0.255022
A	3.19644	0.259414
A	3.2345	0.268198
A	3.27256	0.27786
A	3.31064	0.285766
A	3.34869	0.292207
A	3.38675	0.302162
A	3.42481	0.308018
A	3.46286	0.307432
A	3.50092	0.308018
A	3.53897	0.305968
A	3.57706	0.304212
A	3.61511	0.307432
A	3.65317	0.308896
A	3.69122	0.311239
A	3.72928	0.310068
A	3.76733	0.313581
A	3.80539	0.312117
A	3.84347	0.316216
A	3.88153	0.316509
A	4.03356	0.331734
A	4.07161	0.339054
A	4.10967	0.345203
A	4.14772	0.351644
A	4.18581	0.3575
A	4.22386	0.365405
A	4.26192	0.374482
A	4.29997	0.375946
A	4.33803	0.383266
A	4.37608	0.387365
A	4.41414	0.390293
A	4.45222	0.393806
A	4.49028	0.399662
A	4.52833	0.399077
A	4.56639	0.401712
A	4.60444	0.399662
A	4.6425	0.402883
A	4.68058	0.404932
A	4.71864	0.40054
A	4.75669	0.401419
A	4.79475	0.399077
A	4.83281	0.400248
A	4.87086	0.396441
A	4.90892	0.390878
A	4.94697	0.387658
A	4.98506	0.385315
A	5.02311	0.385022
A	5.06117	0.38473
A	5.09922	0.376531
A	5.13731	0.375067
A	5.17536	0.37009
A	5.21342	0.369504
A	5.25147	0.361892
A	5.28953	0.359842
A	5.32758	0.360428
A	5.36564	0.358086
A	5.40369	0.354279
A	5.44178	0.353694
A	5.47983	0.353694
A	5.51789	0.35223
A	5.55594	0.346667
A	5.594	0.344617
A	5.63206	0.34286
A	5.67011	0.342568
A	5.70819	0.33554
A	5.74625	0.335248
A	5.78431	0.332905
A	5.82236	0.324707
A	5.86042	0.327635
A	5.89847	0.326757
A	5.93653	0.320608
A	5.97458	0.318266
A	6.01264	0.318851
A	6.05072	0.313874
A	6.08878	0.312703
A	6.12683	0.308311
A	6.16489	0.30509
A	6.20294	0.300698
A	6.241	0.29455
A	6.27906	0.295135
A	6.31714	0.291622
A	6.35519	0.288986
A	6.39325	0.280495
A	6.43131	0.278739
A	6.46936	0.276689
A	6.50742	0.272297
A	6.54547	0.268784
A	6.58356	0.262635
A	6.62161	0.258243
A	6.65967	0.255022
A	6.69772	0.255022
A	6.73581	0.260878
A	6.77386	0.255608
A	6.81192	0.247703
A	6.84997	0.241554
A	6.88803	0.245068
A	6.92608	0.24009
A	6.96417	0.232185
A	7.00222	0.224279
A	7.07833	0.216374
A	7.11639	0.217545
A	7.15444	0.217545
A	7.1925	0.20964
A	7.23058	0.204955
A	7.26864	0.202613
A	7.30669	0.205833
A	7.34475	0.211689
A	7.38281	0.213739
A	7.42086	0.212275
A	7.45892	0.213153
A	7.497	0.216374
A	7.53506	0.219009
A	7.57311	0.22223
A	7.61117	0.221937
A	7.64922	0.222815
A	7.68728	0.224865
A	7.72533	0.228964
A	7.76342	0.232185
A	7.80147	0.239212
A	7.83953	0.243311
A	7.87758	0.249459
A	7.91564	0.254437
A	7.95369	0.262049
A	7.99178	0.269955
B	0.0380833	0
B	0.0761389	0.000208671
B	0.114194	0.00052167
B	0.152278	0.000417335
B	0.190389	0.000626006
B	0.228444	0.000730342
B	0.2665	0.000939005
B	0.304583	0.00114768
B	0.342667	0.00187801
B	0.380722	0.00156501
B	0.418778	0.00198235
B	0.456833	0.00229534
B	0.494917	0.00260835
B	0.532972	0.00365168
B	0.571028	0.00333869
B	0.609083	0.00375602
B	0.647139	0.00448635
B	0.685194	0.00469503
B	0.72325	0.00552969
B	0.761306	0.00573837
B	0.799389	0.00636436
B	0.837444	0.00688603
B	0.8755	0.00792938
B	0.913556	0.00824237
B	0.951611	0.00959871
B	0.989667	0.00959871
B	1.02772	0.0110594
B	1.06578	0.0112681
B	1.10386	0.0121027
B	1.14192	0.0129374
B	1.17997	0.0142937
B	1.21803	0.0148154
B	1.25608	0.0158588
B	1.29414	0.0169021
B	1.33222	0.0179454
B	1.37031	0.0190931
B	1.40836	0.0202408
B	1.44642	0.0215971
B	1.48447	0.0229534
B	1.52253	0.0244141
B	1.56058	0.0260835
B	1.59867	0.0275441
B	1.63672	0.0296308
B	1.67478	0.0314045
B	1.71283	0.0340128
B	1.75089	0.0355778
B	1.78894	0.0377689
B	1.82703	0.0405859
B	1.86508	0.0428812
B	1.90314	0.0455939
B	1.94119	0.0488282
B	1.97925	0.0521669
B	2.01731	0.0555056
B	2.05536	0.0595746
B	2.09342	0.0629133
B	2.13147	0.0667737
B	2.16956	0.0710514
B	2.20761	0.0755377
B	2.24567	0.0802327
B	2.28372	0.0847191
B	2.32178	0.0902488
B	2.35983	0.0948395
B	2.39789	0.100056
B	2.43597	0.10569
B	2.47403	0.111324
B	2.51208	0.117376
B	2.55014	0.123323
B	2.58819	0.13
B	2.62625	0.135947
B	2.66431	0.141998
B	2.70236	0.145546
B	2.74044	0.148884
B	2.7785	0.153475
B	2.81656	0.159005
B	2.85461	0.164013
B	2.89267	0.169334
B	2.93072	0.174655
B	2.96881	0.179037
B	3.00686	0.184045
B	3.15839	0.199069
B	3.19644	0.20199
B	3.2345	0.207729
B	3.27256	0.211798
B	3.31064	0.217327
B	3.34869	0.222753
B	3.38675	0.228908
B	3.42481	0.233604
B	3.46286	0.236629
B	3.50092	0.239968
B	3.53897	0.242159
B	3.57706	0.245185
B	3.61511	0.248419
B	3.65317	0.251445
B	3.69122	0.254679
B	3.72928	0.257183
B	3.76733	0.260313
B	3.80539	0.262504
B	3.84347	0.264278
B	3.88153	0.266677
B	4.03356	0.270538
B	4.07161	0.271268
B	4.10967	0.273042
B	4.14772	0.274294
B	4.18581	0.275754
B	4.22386	0.276902
B	4.26192	0.276693
B	4.29997	0.276693
B	4.33803	0.275963
B	4.37608	0.274502
B	4.41414	0.272207
B	4.45222	0.270955
B	4.49028	0.268138
B	4.52833	0.265634
B	4.56639	0.263339
B	4.60444	0.260522
B	4.6425	0.258539
B	4.68058	0.255722
B	4.71864	0.25374
B	4.75669	0.251236
B	4.79475	0.248523
B	5.02311	0.230474
B	5.06117	0.228282
B	5.17536	0.219101
B	5.21342	0.21618
B	5.25147	0.213884
B	5.28953	0.211589
B	5.32758	0.210024
B	5.36564	0.208042
B	5.40369	0.206998
B	5.44178	0.203973
B	5.47983	0.202512
B	5.51789	0.200425
B	5.55594	0.199904
B	5.594	0.197504
B	5.63206	0.194687
B	5.67011	0.196774
B	5.74625	0.192496
B	5.82236	0.189262
B	5.86042	0.189783
B	5.89847	0.188427
B	5.97458	0.183523
B	6.01264	0.183106
B	6.08878	0.179559
B	6.12683	0.178724
B	6.16489	0.177055
B	6.20294	0.177889
B	6.241	0.175385
B	6.27906	0.176011
B	6.31714	0.176742
B	6.35519	0.175385
B	6.39325	0.173716
B	6.43131	0.173299
B	6.46936	0.17382
B	6.50742	0.172047
B	6.54547	0.171525
B	6.58356	0.171212
B	6.62161	0.169856
B	6.65967	0.168812
B	6.69772	0.169647
B	6.73581	0.169543
B	6.77386	0.168812
B	6.81192	0.167769
B	6.84997	0.166412
B	6.88803	0.167039
B	6.92608	0.1661
B	6.96417	0.165265
B	7.00222	0.164221
B	7.04028	0.163909
B	7.07833	0.163595
B	7.11639	0.164221
B	7.15444	0.163804
B	7.1925	0.163491
B	7.23058	0.164743
B	7.26864	0.163595
B	7.30669	0.165369
B	7.34475	0.163804
B	7.38281	0.164743
B	7.42086	0.166621
B	7.45892	0.167039
B	7.497	0.168186
B	7.53506	0.168499
B	7.57311	0.16996
B	7.61117	0.170899
B	7.64922	0.171838
B	7.68728	0.172986
B	7.72533	0.174446
B	7.76342	0.175072
B	7.80147	0.177055
B	7.83953	0.177263
B	7.87758	0.177785
B	7.91564	0.179559
B	7.95369	0.181124
B	7.99178	0.181958
C	0.0380833	0
C	0.0761389	0
C	0.114194	-0.00120745
C	0.152278	-0.000804967
C	0.190389	0.000402454
C	0.228444	-0.00120745
C	0.2665	-0.00120745
C	0.304583	-0.000804967
C	0.342667	-0.000402484
C	0.380722	-0.000402484
C	0.418778	0.00120742
C	0.456833	0.0016099
C	0.494917	0.000804937
C	0.532972	0.00241484
C	0.571028	0.00120742
C	0.609083	0.00241484
C	0.647139	0.00281733
C	0.685194	0.00321981
C	0.72325	0.00402475
C	0.761306	0.00402475
C	0.799389	0.00482971
C	0.837444	0.00482971
C	0.8755	0.00603713
C	0.913556	0.00603713
C	0.951611	0.00764704
C	0.989667	0.00804952
C	1.02772	0.00764704
C	1.06578	0.00845201
C	1.10386	0.0112693
C	1.14192	0.0104644
C	1.17997	0.0128792
C	1.21803	0.0144891
C	1.25608	0.0148916
C	1.29414	0.0160991
C	1.33222	0.0173065
C	1.37031	0.0201238
C	1.40836	0.0193189
C	1.44642	0.0205263
C	1.48447	0.0221362
C	1.52253	0.0245511
C	1.56058	0.0241486
C	1.59867	0.026161
C	1.63672	0.0285758
C	1.67478	0.0305882
C	1.71283	0.0317957
C	1.75089	0.0338081
C	1.78894	0.0362229
C	1.82703	0.0398452
C	1.86508	0.0414551
C	1.90314	0.04387
C	1.94119	0.0462848
C	1.97925	0.0503096
C	2.01731	0.052322
C	2.05536	0.0555418
C	2.09342	0.0623839
C	2.13147	0.0627864
C	2.16956	0.0676161
C	2.20761	0.0716409
C	2.24567	0.0756656
C	2.28372	0.0813003
C	2.32178	0.0857275
C	2.35983	0.0905573
C	2.39789	0.0965944
C	2.43597	0.103034
C	2.47403	0.108669
C	2.51208	0.114706
C	2.55014	0.121548
C	2.58819	0.13
C	2.62625	0.13805
C	2.66431	0.144892
C	2.70236	0.152941
C	2.74044	0.161393
C	2.7785	0.16904
C	2.81656	0.177895
C	2.85461	0.186749
C	2.89267	0.195604
C	2.93072	0.203653
C	2.96881	0.213313
C	3.00686	0.22257
C	3.15839	0.251951
C	3.19644	0.259195
C	3.2345	0.26644
C	3.27256	0.274489
C	3.31064	0.280929
C	3.34869	0.288173
C	3.38675	0.293003
C	3.42481	0.294613
C	3.46286	0.296223
C	3.50092	0.297028
C	3.53897	0.29582
C	3.57706	0.29582
C	3.61511	0.296223
C	3.65317	0.29582
C	3.69122	0.29743
C	3.72928	0.297833
C	3.76733	0.30065
C	3.80539	0.30065
C	3.84347	0.301053
C	3.88153	0.301455
C	4.03356	0.305077
C	4.07161	0.308297
C	4.10967	0.311115
C	4.14772	0.314737
C	4.18581	0.319567
C	4.22386	0.325604
C	4.26192	0.330433
C	4.29997	0.335263
C	4.33803	0.336471
C	4.37608	0.335666
C	4.41414	0.335263
C	4.45222	0.33969
C	4.49028	0.341703
C	4.52833	0.342105
C	4.56639	0.340898
C	4.60444	0.337678
C	4.6425	0.33969
C	4.68058	0.340495
C	4.71864	0.340898
C	4.75669	0.343313
C	4.79475	0.341703
C	4.83281	0.343313
C	4.87086	0.343715
C	4.90892	0.34452
C	4.94697	0.342105
C	4.98506	0.338483
C	5.02311	0.338483
C	5.06117	0.336068
C	5.09922	0.333653
C	5.13731	0.331238
C	5.17536	0.326811
C	5.21342	0.324799
C	5.25147	0.323189
C	5.28953	0.317554
C	5.32758	0.314334
C	5.36564	0.309907
C	5.40369	0.3087
C	5.44178	0.306687
C	5.47983	0.301455
C	5.51789	0.301858
C	5.55594	0.294613
C	5.594	0.294613
C	5.63206	0.291393
C	5.67011	0.289783
C	5.70819	0.285759
C	5.74625	0.284149
C	5.78431	0.283344
C	5.82236	0.278514
C	5.86042	0.280526
C	5.89847	0.278111
C	5.93653	0.274087
C	5.97458	0.272879
C	6.01264	0.272879
C	6.05072	0.272477
C	6.08878	0.269659
C	6.12683	0.268452
C	6.16489	0.26644
C	6.20294	0.26322
C	6.241	0.260805
C	6.27906	0.259598
C	6.31714	0.257183
C	6.35519	0.252755
C	6.39325	0.251146
C	6.43131	0.248328
C	6.46936	0.246316
C	6.50742	0.236656
C	6.54547	0.235449
C	6.58356	0.232229
C	6.62161	0.226594
C	6.65967	0.223375
C	6.69772	0.22257
C	6.73581	0.220155
C	6.77386	0.218947
C	6.81192	0.219752
C	6.84997	0.218545
C	6.88803	0.220557
C	6.92608	0.221362
C	6.96417	0.223375
C	7.00222	0.225789
C	7.04028	0.230217
C	7.07833	0.231424
C	7.11639	0.237461
C	7.15444	0.236254
C	7.1925	0.236254
C	7.23058	0.239071
C	7.26864	0.238266
C	7.30669	0.241084
C	7.34475	0.243901
C	7.38281	0.245108
C	7.42086	0.249133
C	7.45892	0.253963
C	7.497	0.25839
C	7.53506	0.264427
C	7.57311	0.268452
C	7.61117	0.271269
C	7.64922	0.275697
C	7.68728	0.281331
C	7.72533	0.285759
C	7.76342	0.293406
C	7.80147	0.300248
C	7.83953	0.30709
C	7.87758	0.313529
C	7.91564	0.321579
C	7.95369	0.330433
C	7.99178	0.340495

## Sheet: Fig1S2A
Strain	Arabinose (%)	GFP fluorescence (%)	Diameter	Length
AV100	10	213.77	0.95745	3.72671
AV100	10	170.138	1.12827	3.99106
AV100	10	190.083	0.974805	3.78852
AV100	10	214.089	0.95979	3.74939
AV100	10	228.812	0.984685	3.40516
AV100	10	207.042	1.13789	3.80315
AV100	10	253.922	1.02252	4.38211
AV100	10	171.95	1.04852	4.87903
AV100	10	150.09	1.09194	4.4839
AV100	10	407.286	1.14823	3.90312
AV100	10	172.849	1.066	3.44877
AV100	10	245.602	1.12807	3.08672
AV100	10	173.841	1.03883	3.98541
AV100	10	309.323	1.00367	3.8517
AV100	10	166.851	1.01472	3.92788
AV100	10	161.702	1.06717	4.64626
AV100	10	154.858	1.0532	4.20459
AV100	10	171.546	1.00926	3.57649
AV100	10	220.501	0.978575	4.50827
AV100	10	205.267	1.09642	3.37779
AV100	10	116.617	1.10818	3.47373
AV100	10	185.607	1.04981	4.31243
AV100	10	130.491	1.05378	3.77514
AV100	10	256.007	1.05651	4.08434
AV100	10	177.597	1.12242	2.86897
AV100	10	129.338	1.0658	3.86483
AV100	10	364.461	1.0593	5.74054
AV100	10	262.543	0.992615	3.63727
AV100	10	232.017	1.071	3.26534
AV100	10	122.157	1.04682	3.04284
AV100	10	360.874	0.98306	5.02814
AV100	10	236.168	1.06554	4.33206
AV100	10	176.946	1.15356	3.02224
AV100	10	257.459	1.07237	4.77548
AV100	10	181.084	1.05859	4.47713
AV100	10	324.552	0.969865	4.36794
AV100	10	138.095	1.03766	3.07028
AV100	10	284.447	1.05774	3.32111
AV100	10	257.849	0.991575	4.23858
AV100	10	144.545	0.97253	4.05756
AV100	10	172.904	1.00763	3.56603
AV100	10	259.131	1.02193	3.65092
AV100	10	366.483	0.99632	4.28526
AV100	10	166.79	1.0192	3.7767
AV100	10	172.855	0.98384	4.15226
AV100	10	161.434	1.09557	5.09262
AV100	10	298.178	1.0491	3.36973
AV100	10	254.255	1.04215	4.56222
AV100	10	188.292	1.01757	3.62752
AV100	10	253.362	1.10337	4.4592
AV100	10	416.013	0.9919	3.59164
AV100	10	241.539	0.97903	3.52983
AV100	10	137.643	1.14614	4.64867
AV100	10	193.563	1.07647	5.08242
AV100	10	205.19	1.11807	3.74335
AV100	10	287.609	0.983255	3.6322
AV100	10	279.738	1.13061	2.88184
AV100	10	169.487	1.02642	3.20677
AV100	10	133.887	1.12054	4.34083
AV100	10	210.631	1.16129	4.41077
AV100	10	104.764	0.96746	4.71711
AV100	10	131.866	1.00457	3.05253
AV100	10	271.034	1.07341	5.01384
AV100	10	165.687	1.13802	6.09141
AV100	10	128.155	1.10838	2.99832
AV100	10	230.938	1.01588	5.19792
AV100	10	162.116	1.0283	3.27912
AV100	10	337.603	1.07354	3.0589
AV100	10	146.94	1.08855	3.19027
AV100	10	175.317	1.05215	5.94341
AV100	10	535.524	1.02453	3.30766
AV100	10	244.26	1.20874	4.28701
AV100	10	171.341	1.03357	4.64977
AV100	10	213.595	0.966745	5.12954
AV100	10	251.698	1.05462	3.46281
AV100	10	191.373	1.02011	4.34089
AV100	10	88.6815	1.0012	3.66379
AV100	10	236.285	1.06073	3.9039
AV100	10	236.233	1.17058	4.17508
AV100	10	137.077	1.02355	4.30729
AV100	10	153.594	1.1503	3.36083
AV100	10	218.5	1.11858	3.71053
AV100	10	185.226	1.02992	4.31782
AV100	10	173.247	1.01263	3.46223
AV100	10	205.68	1.11163	3.25617
AV100	10	199.256	1.03408	4.00953
AV100	10	204.591	1.06249	3.48842
AV100	10	274.911	1.00932	4.73564
AV100	10	334.169	1.00035	3.13333
AV100	10	182.311	1.09694	3.91092
AV100	10	198.68	1.05547	4.1498
AV100	10	256.103	1.02895	3.85008
AV100	10	168.246	1.08693	3.4686
AV100	10	155.635	1.12515	3.36908
AV100	10	130.945	0.987935	4.67753
AV100	10	200.719	0.93249	3.4242
AV100	10	249.734	1.04247	3.7104
AV100	10	153.211	1.10357	2.6806
AV100	10	227.049	0.970515	3.50694
AV100	10	278.652	1.06756	3.67783
AV100	10	139.232	1.10181	5.07689
AV100	10	312.243	0.98787	3.36791
AV100	10	177.828	1.09213	4.31529
AV100	10	219.35	1.15525	2.84147
AV100	10	220.574	0.981045	3.40334
AV100	10	244.534	1.10851	3.39215
AV100	10	345.19	0.93938	3.43603
AV100	10	188.469	1.05404	3.62082
AV100	10	117.824	1.08596	3.76311
AV100	10	150.936	1.10624	5.10452
AV100	10	131.004	1.08556	2.99676
AV100	10	251.549	0.986765	4.7957
AV100	10	223.609	1.07835	2.96719
AV100	10	289.602	1.10461	2.62477
AV100	10	147.815	1.02927	4.87169
AV100	10	172.985	1.03929	3.51955
AV100	10	168.341	1.08283	2.96927
AV100	10	223.812	1.05378	3.24877
AV100	10	189.465	1.0465	3.06683
AV100	10	242.214	1.05112	3.08665
AV100	10	139.677	0.982345	3.76259
AV100	10	390.91	1.11871	3.1757
AV100	10	301.638	1.08511	6.38469
AV100	10	159.673	1.22785	2.30516
AV100	10	200.629	1.11813	3.21626
AV100	10	295.266	1.01127	2.99943
AV100	10	256	0.96525	3.67601
AV100	10	218.66	1.01881	3.52339
AV100	10	233.599	0.94627	7.99955
AV100	10	249.105	1.01628	4.09929
AV100	10	241.294	1.16753	2.51764
AV100	10	198.589	1.03005	3.23199
AV100	10	150.993	1.09252	3.23563
AV100	10	104.776	0.978445	4.20823
AV100	10	158.159	1.2244	3.33528
AV100	10	169.622	1.1286	4.0339
AV100	10	280.704	1.27166	3.0227
AV100	10	250.5	1.00483	3.39657
AV100	10	156.749	1.05287	4.97971
AV100	10	141.557	1.06594	2.67839
AV100	10	226.337	0.99996	4.33121
AV100	10	211.815	1.00497	3.50428
AV100	10	196.255	1.02674	3.7531
AV100	10	192.337	1.1271	4.0352
AV100	10	119.553	0.98787	4.71478
AV100	10	211.974	1.18417	2.76692
AV100	10	257.655	1.14302	4.94604
AV100	10	124.751	1.05664	5.37856
AV100	10	252.397	1.16968	2.70816
AV100	10	222.207	1.09701	2.65687
AV100	10	410.031	1.03259	3.13456
AV100	10	178.552	1.09239	3.88472
AV100	10	135.085	0.985205	5.01254
AV100	10	183.188	1.01868	4.35838
AV100	10	319.014	1.07387	4.54746
AV100	10	216.527	1.08615	3.75739
AV100	10	265.455	1.04403	3.27145
AV100	10	220.1	1.19444	3.36882
AV100	10	234.652	1.02921	3.16479
AV100	10	160.462	1.06587	3.73002
AV100	10	213.096	1.04968	3.74764
AV100	10	340.225	1.00223	3.13053
AV100	10	230.07	1.10221	4.73967
AV100	10	236.822	0.99359	3.70045
AV100	10	270.953	0.911105	3.57487
AV100	10	212.507	1.03519	4.10442
AV100	10	433.173	1.11579	3.03258
AV100	10	102.794	1.05547	4.93077
AV100	10	73.1113	1.07523	3.50844
AV100	10	193.999	1.09675	2.97316
AV100	10	277.359	1.045	4.30235
AV100	10	163.441	1.0803	4.84367
AV100	10	306.843	1.10909	4.83847
AV100	10	247.305	1.04039	3.97287
AV100	10	294.235	1.05593	5.31733
AV100	10	236.605	1.06282	3.01866
AV100	10	251.53	1.01809	3.60561
AV100	10	198.552	1.00276	5.4938
AV100	10	246.667	0.991055	3.83084
AV100	10	185.366	0.96395	4.26114
AV100	10	162.817	1.06035	2.91876
AV100	10	252.588	1.03279	3.31084
AV100	10	276.048	0.995475	3.25611
AV100	10	0.8	1.51307	2.48768
AV100	10	352.889	1.04968	3.39138
AV100	10	5.31286	1.99784	3.1265
AV100	10	241.073	1.03584	3.41367
AV100	10	301.952	1.12301	4.86402
AV100	10	247.555	1.03038	3.67828
AV100	10	318.132	1.05261	3.45182
AV100	10	189.772	1.01686	3.73906
AV100	10	99.6879	0.975065	5.85052
AV100	10	209.13	1.04201	6.2595
AV100	10	195.374	1.07055	3.76233
AV100	10	208.901	1.06028	3.11688
AV100	10	188.747	1.05658	6.21296
AV100	10	152.185	1.08615	3.90221
AV100	10	168.361	1.06854	3.75713
AV100	10	363.639	1.09973	2.69919
AV100	10	239.736	1.04871	4.15799
AV100	10	177.349	0.998205	3.83948
AV100	10	203.855	1.1104	3.79295
AV100	10	0.8	1.99283	3.10238
AV100	10	280.417	1.00035	4.20869
AV100	10	0.8	2.04152	2.75119
AV100	10	0.8	1.85874	2.53266
AV100	10	173.184	1.00341	6.5065
AV100	10	115.635	0.98527	4.22097
AV100	10	273.636	1.03629	2.82899
AV100	10	363.612	1.0853	2.81983
AV100	10	162.807	1.04513	3.03017
AV100	10	48.3102	1.05547	4.32796
AV100	10	510.163	1.04903	2.52766
AV100	10	200.046	1.12151	4.22832
AV100	10	267.412	1.01381	3.8974
AV100	10	232.323	0.968955	3.37889
AV100	10	233.495	1.1061	3.11993
AV100	10	159.854	1.05625	2.75561
AV100	10	196.507	1.09629	3.41517
AV100	10	260.273	0.99177	3.36661
AV100	10	147.658	1.05086	5.55159
AV100	10	171.193	0.992615	4.00627
AV100	10	199.806	1.03467	3.1759
AV100	10	185.97	1.07926	3.3033
AV100	0.1	39.6265	0.94978	4.05236
AV100	0.1	70.2999	0.948155	5.85793
AV100	0.1	150.504	1.08381	3.55121
AV100	0.1	10.0452	0.97695	3.75836
AV100	0.1	42.3559	0.9451	4.61221
AV100	0.1	82.6894	0.947765	3.45676
AV100	0.1	17.2282	1.02199	4.6111
AV100	0.1	96.2882	0.8853	4.47349
AV100	0.1	205.907	0.989105	3.2775
AV100	0.1	40.8258	0.904345	5.22015
AV100	0.1	136.231	0.88985	6.28465
AV100	0.1	5.0289	0.947375	3.91749
AV100	0.1	18.221	0.942955	4.20622
AV100	0.1	253.649	1.00009	4.64367
AV100	0.1	43.7748	0.92365	3.90364
AV100	0.1	28.4195	0.94081	6.3284
AV100	0.1	52.13	0.939705	4.17768
AV100	0.1	121.199	1.02401	4.54305
AV100	0.1	182.528	1.02551	4.48987
AV100	0.1	114.518	0.96928	4.37541
AV100	0.1	167.863	1.03551	3.2175
AV100	0.1	173.728	1.03259	6.29564
AV100	0.1	35.9762	0.93951	4.19484
AV100	0.1	202.679	1.10299	3.55173
AV100	0.1	247.051	1.05124	6.18872
AV100	0.1	50.9724	1.01335	5.36926
AV100	0.1	127.562	0.97214	5.29847
AV100	0.1	175.1	0.959595	3.69018
AV100	0.1	498.186	0.980005	3.6543
AV100	0.1	16.1953	0.908115	5.87587
AV100	0.1	221.511	1.045	3.52443
AV100	0.1	160.879	1.06529	3.67191
AV100	0.1	33.0672	0.918775	6.92055
AV100	0.1	311.761	0.996255	3.2487
AV100	0.1	48.969	0.94185	5.83732
AV100	0.1	181.69	1.08933	3.25221
AV100	0.1	49.8746	0.9971	5.69953
AV100	0.1	38.6468	0.97019	4.37937
AV100	0.1	338.268	0.993395	4.44496
AV100	0.1	82.3518	1.0259	5.65032
AV100	0.1	323.628	0.98956	3.27028
AV100	0.1	304.829	0.96993	3.27489
AV100	0.1	76.0046	1.0309	3.50298
AV100	0.1	279.615	0.997945	4.69306
AV100	0.1	24.4552	1.00919	5.69341
AV100	0.1	146.301	1.09038	5.54638
AV100	0.1	83.7111	0.98865	3.48127
AV100	0.1	67.8504	0.944775	5.39532
AV100	0.1	236.303	0.96473	4.48916
AV100	0.1	41.858	1.22434	7.0447
AV100	0.1	23.2746	0.93873	7.05055
AV100	0.1	45.898	0.90168	6.6352
AV100	0.1	234.751	1.16779	3.00879
AV100	0.1	344.523	1.14465	3.20489
AV100	0.1	8.53291	0.94029	3.5722
AV100	0.1	20.3113	0.982605	3.9596
AV100	0.1	329.032	1.01472	4.15343
AV100	0.1	21.2257	1.01634	5.70934
AV100	0.1	37.4413	0.98956	4.79141
AV100	0.1	143.411	1.21537	4.29364
AV100	0.1	73.9497	1.08479	3.65677
AV100	0.1	406.312	1.02187	3.02725
AV100	0.1	49.618	1.04143	7.0863
AV100	0.1	208.489	1.13321	4.23761
AV100	0.1	321.906	0.942305	4.19243
AV100	0.1	24.8141	0.95602	3.31279
AV100	0.1	250.926	1.06567	3.94634
AV100	0.1	139.384	1.02817	3.60126
AV100	0.1	183.722	1.0749	3.08581
AV100	0.1	32.6628	0.95927	6.20315
AV100	0.1	57.4981	1.03798	6.11344
AV100	0.1	105.388	0.950495	4.78556
AV100	0.1	237.463	1.08862	3.23511
AV100	0.1	146.971	0.99801	4.24639
AV100	0.1	232.519	1.0528	3.36973
AV100	0.1	199.279	1.01595	3.93822
AV100	0.1	11.6232	0.932035	3.9544
AV100	0.1	296.003	1.03155	3.06449
AV100	0.1	136.293	1.16681	2.7794
AV100	0.1	200.426	1.06691	4.25106
AV100	0.1	71.7789	0.92196	3.9665
AV100	0.1	56.4372	0.93782	4.06237
AV100	0.1	49.2224	0.966355	3.8573
AV100	0.1	36.4279	0.98904	4.41597
AV100	0.1	250.163	1.00835	3.62167
AV100	0.1	326.643	0.99515	5.78688
AV100	0.1	193.277	1.02076	3.96182
AV100	0.1	40.5552	1.0257	4.48149
AV100	0.1	43.2279	0.98787	4.96723
AV100	0.1	19.5225	0.971035	2.49763
AV100	0.1	330.419	1.13074	2.77121
AV100	0.1	58.3622	0.98566	4.3381
AV100	0.1	178.089	0.970385	4.07901
AV100	0.1	310.376	1.07777	4.08415
AV100	0.1	399.909	0.96187	3.53119
AV100	0.1	140.834	1.12638	3.49908
AV100	0.1	22.2174	0.967395	4.62566
AV100	0.1	33.6786	0.92469	6.34159
AV100	0.1	290.793	1.09915	4.22806
AV100	0.1	154.204	1.0675	4.59478
AV100	0.1	146.203	1.04689	3.32787
AV100	0.1	244.909	0.979485	3.37278
AV100	0.1	56.8629	1.06529	5.65448
AV100	0.1	340.343	1.08518	3.93166
AV100	0.1	49.2647	0.94913	3.91215
AV100	0.1	128.964	1.08543	5.66104
AV100	0.1	58.4201	0.87477	4.88969
AV100	0.1	39.3072	1.05105	2.95399
AV100	0.1	63.4771	0.929305	7.01415
AV100	0.1	124.626	1.08004	2.97427
AV100	0.1	140.529	1.05989	2.7909
AV100	0.1	41.1737	0.9516	4.27499
AV100	0.1	71.742	1.01185	3.28796
AV100	0.1	122.82	1.13347	3.20431
AV100	0.1	35.8176	0.980655	3.1328
AV100	0.1	148.053	1.18138	4.05119
AV100	0.1	153.475	1.01107	4.87955
AV100	0.1	29.0621	0.96486	3.54341
AV100	0.1	14.2548	0.89895	3.95194
AV100	0.1	242.7	0.99801	4.01622
AV100	0.1	257.456	1.0426	4.55104
AV100	0.1	37.1434	0.93054	7.28975
AV100	0.1	122.764	1.06932	2.98597
AV100	0.1	237.065	1.20412	3.04284
AV100	0.1	50.3969	0.927615	5.05901
AV100	0.1	270.831	1.29317	3.14203
AV100	0.1	207.196	1.04566	5.03249
AV100	0.1	39.3239	0.96395	3.94407
AV100	0.1	189.38	1.07906	3.3579
AV100	0.1	142.99	0.957385	4.52205
AV100	0.1	273.69	1.11495	5.80346
AV100	0.1	222.891	1.05593	3.2888
AV100	0.1	15.3459	0.944645	5.47053
AV100	0.1	185.569	1.03233	3.28348
AV100	0.1	45.1466	0.95953	3.39534
AV100	0.1	210.842	1.04591	4.21447
AV100	0.1	47.179	0.921245	3.67757
AV100	0.1	247.076	1.16142	4.56879
AV100	0.1	223.017	1.11976	3.50669
AV100	0.1	35.1285	0.956475	5.63297
AV100	0.1	304.194	0.985205	3.82655
AV100	0.1	170.753	1.00022	3.97065
AV100	0.1	209.212	1.00217	3.89311
AV100	0.1	226.27	1.04611	2.87781
AV100	0.1	32.7523	0.987415	3.59145
AV100	0.1	165.261	0.945295	4.0105
AV100	0.1	180.303	0.984295	3.41887
AV100	0.1	97.8295	1.07672	4.48935
AV100	0.1	187.048	1.07438	4.13257
AV100	0.1	282.041	1.08661	3.08028
AV100	0.1	256.69	0.998985	4.66134
AV100	0.1	235.751	1.10578	4.19224
AV100	0.1	131.034	1.04065	4.21479
AV100	0.1	218.12	1.02317	4.59427
AV100	0.1	141.383	1.2454	6.8731
AV100	0.1	100.13	0.95316	4.60564
AV100	0.1	50.2888	1.0073	5.54203
AV100	0.1	273.204	1.02544	4.62254
AV100	0.1	238.968	1.11664	3.64286
AV100	0.1	244.276	1.03675	4.44691
AV100	0.1	267.372	0.991445	4.53979
AV100	0.1	50.1964	1.01238	3.93185
AV100	0.1	14.7742	1.01537	5.15756
AV100	0.1	206.389	1.00263	4.19139
AV100	0.1	54.2091	0.954655	3.95343
AV100	0.1	62.8104	0.938275	5.74925
AV100	0.1	75.2521	0.86099	4.02876
AV100	0.1	179.921	1.13587	4.38919
AV100	0.1	384.756	0.997815	5.13578
AV100	0.1	30.003	0.879645	4.92713
AV100	0.1	104.632	0.897845	6.18852
AV100	0.1	36.8889	0.948675	4.1498
AV100	0.1	24.1636	0.968825	3.77754
AV100	0.1	40.6461	0.944645	8.96025
AV100	0.1	203.344	1.07712	3.67464
AV100	0.1	146.544	1.0892	2.72409
AV100	0.1	20.1401	0.88361	4.49833
AV100	0.1	121.472	1.01712	3.52229
AV100	0.1	83.7358	0.92313	3.87615
AV100	0.1	54.367	0.97565	6.04812
AV100	0.1	179.491	1.12658	3.58631
AV100	0.1	3.54746	0.90805	4.43105
AV100	0.1	71.7157	0.96122	4.38737
AV100	0.1	237.283	1.11664	2.86637
AV100	0.1	156.122	1.02063	3.46691
AV100	0.1	257.754	0.93951	4.38256
AV100	0.1	81.5462	0.95979	4.83918
AV100	0.1	23.0857	0.97253	3.6064
AV100	0.1	248.245	0.97019	5.12882
AV100	0.1	64.091	0.92807	4.04404
AV100	0.1	219.992	1.02967	5.06604
AV100	0.1	31.2588	0.970125	3.77813
AV100	0.1	179.26	1.03207	3.12481
AV100	0.1	182.109	0.994955	3.86314
AV100	0.1	277.81	1.17136	4.05613
AV100	0.1	6.37193	0.90753	3.37857
AV100	0.1	144.97	0.992615	3.96656
AV100	0.1	244.473	1.0504	5.02951
AV100	0.1	163.924	1.01569	3.64624
AV100	0.1	217.205	1.00997	3.62758
AV100	0.1	136.599	1.08127	2.90596
AV100	0.1	32.2733	1.01738	3.52034
AV100	0.1	217.572	1.01491	4.96561
AV100	0.1	244.557	1.05164	3.18916
AV100	0.1	64.7398	0.95043	6.9576
AV100	0.1	161.472	1.02199	3.28166
AV100	0.1	183.956	1.02375	4.86889
AV100	0.1	180.381	1.1741	3.90702
AV100	0.1	388.017	1.08556	4.44899
AV100	0.1	324.321	1.08498	3.71137
AV100	0.1	116.401	0.86307	5.44193
AV100	0.1	284.759	1.0426	3.92788
AV100	0.1	238.306	1.04825	4.60259
AV100	0.1	404.065	1.04266	4.06581
AV100	0.1	11.6197	0.96447	3.32592
AV100	0.1	251.768	1.0454	3.32176
AV100	0.1	160.54	0.981175	4.30768
AV100	0.1	132.381	1.07666	3.28692
AV100	0.1	181.583	1.03344	3.19495
AV100	0.1	286.133	1.04572	5.68399
AV100	0.1	275.082	1.33653	4.24287
AV100	0.1	261.341	1.02635	4.88091
AV100	0.1	236.248	0.995085	4.05893
AV100	0.1	42.7048	0.89648	5.06298
AV100	0.1	15.7882	0.95433	3.64806
AV100	0.1	221.399	1.04221	4.6204
AV100	0.1	171.723	1.07699	3.39859
AV100	0.1	39.4214	0.932555	4.70418
AV100	0.1	134.061	0.990795	3.83838
AV100	0.1	196.705	1.05268	4.10846
AV100	0.1	248.647	1.05378	3.00917
AV100	0.1	197.874	1.07315	5.68945
AV100	0.1	136.237	1.0634	3.80348
AV100	0.1	249.949	1.01777	3.86035
AV100	0.1	193.376	0.976365	3.92522
AV100	0.1	94.8065	0.945815	6.21368
AV100	0.1	7.39455	0.93184	5.32747
AV100	0.1	154.958	1.06567	2.81119
AV100	0.1	100.844	0.966095	3.32852
AV100	0.1	43.1545	0.899275	5.33741
AV100	0.1	48.7463	0.980005	3.8231
AV100	0.1	163.733	0.92898	4.83509
AV100	0.1	33.223	1.01543	4.23215
AV100	0.1	249.855	1.01316	4.41662
AV100	0.1	28.8776	0.91793	3.47932
AV100	0.1	103.697	1.06295	3.64344
AV100	0.1	22.4896	0.9022	3.61732
AV100	0.1	76.9782	0.91195	6.08413
AV100	0.1	237.723	1.00392	3.93816
AV100	0.1	186.311	1.18762	4.00738
AV100	0.1	46.4419	0.91975	6.64235
AV100	0.1	193.429	1.15622	3.55127
AV100	0.1	328.636	0.99775	3.93367
AV100	0.1	196.557	0.99216	3.46847
AV100	0.1	221.711	0.974415	3.47529
AV100	0.1	25.9265	0.89297	4.11665
AV100	0.1	14.0072	0.94575	5.57707
AV100	0.1	212.96	1.05976	3.15101
AV100	0.1	213.293	0.95849	3.88388
AV100	0.1	201.244	1.09753	4.0456
AV100	0.1	187.507	1.00425	4.51821
AV100	0.1	143.493	1.12183	3.94797
AV100	0.1	67.8485	1.00249	6.58775
AV100	0.1	66.2325	0.998465	3.14009
AV100	0.1	48.8044	0.97825	4.11346
AV100	0.1	209.032	1.00516	5.8654
AV100	0.1	291.959	1.10409	3.85495
AV100	0.1	242.917	1.01283	5.09964
AV100	0.1	126.275	0.99515	4.18249
AV100	0.1	216.577	0.99645	4.69956
AV100	0.1	48.0633	0.922545	3.62791
AV100	0.1	174.308	1.08817	3.57493
AV100	0.1	46.1761	0.93873	4.11313
AV100	0.1	128.388	1.04312	3.72411
AV100	0.1	209.418	1.06171	2.76036
AV100	0.1	36.6654	0.948935	4.16474
AV100	0.01	16.6755	0.88062	4.12652
AV100	0.01	164.921	0.975195	4.95664
AV100	0.01	4.13024	0.942435	5.77909
AV100	0.01	0.8	0.962195	4.71939
AV100	0.01	6.15708	0.89427	4.3602
AV100	0.01	6.07908	0.86892	4.82385
AV100	0.01	20.2075	0.963495	2.71511
AV100	0.01	8.61177	0.923	4.30319
AV100	0.01	7.09115	0.952055	4.02233
AV100	0.01	6.45076	1.0415	3.32007
AV100	0.01	0.8	0.876395	3.9637
AV100	0.01	0.8	0.951665	4.63028
AV100	0.01	33.546	0.92079	6.21666
AV100	0.01	0.8	0.920335	3.79392
AV100	0.01	0.8	0.95706	4.96633
AV100	0.01	16.0987	0.9217	3.0992
AV100	0.01	19.507	1.01706	6.12411
AV100	0.01	3.82588	0.92287	4.55806
AV100	0.01	0.8	0.960895	3.43213
AV100	0.01	0.8	0.90207	4.31165
AV100	0.01	4.92455	1.0129	3.94628
AV100	0.01	1.52047	0.889915	4.99909
AV100	0.01	23.8944	0.98267	3.58501
AV100	0.01	21.1667	0.90883	4.70743
AV100	0.01	0.8	0.888615	3.90826
AV100	0.01	0.8	0.93171	3.64098
AV100	0.01	17.4617	0.87776	5.39896
AV100	0.01	0.8	0.849095	5.06402
AV100	0.01	6.64963	0.91845	3.84956
AV100	0.01	20.4637	0.94341	4.73011
AV100	0.01	16.3689	0.945425	3.81244
AV100	0.01	0.8	0.89739	4.14382
AV100	0.01	8.32084	0.944515	4.4878
AV100	0.01	35.7961	0.93704	3.93809
AV100	0.01	0.916776	0.876135	4.42422
AV100	0.01	4.29248	0.915265	3.91677
AV100	0.01	7.52842	0.92053	4.81708
AV100	0.01	0.8	0.91845	4.86109
AV100	0.01	6.34598	0.90064	5.63842
AV100	0.01	0.8	0.901615	4.94923
AV100	0.01	0.8	0.847535	4.74936
AV100	0.01	17.286	0.903305	3.96039
AV100	0.01	10.3549	0.9113	3.23251
AV100	0.01	11.3032	0.94159	4.60168
AV100	0.01	0.811655	0.94562	3.93243
AV100	0.01	23.2674	0.917865	4.46296
AV100	0.01	3.01453	0.92547	4.0989
AV100	0.01	2.38836	0.890045	6.56825
AV100	0.01	13.9255	0.92404	4.35065
AV100	0.01	14.7276	1.02388	5.97558
AV100	0.01	2.22397	0.92274	4.21577
AV100	0.01	6.1347	0.921245	5.57453
AV100	0.01	4.88762	0.91715	4.37645
AV100	0.01	0.8	0.93951	3.68017
AV100	0.01	10.3949	0.907595	5.09061
AV100	0.01	20.2029	0.932425	5.41762
AV100	0.01	3.3605	1.0073	3.08919
AV100	0.01	5.59417	0.908375	3.7711
AV100	0.01	58.0192	1.05131	3.41737
AV100	0.01	16.0076	0.93067	4.4707
AV100	0.01	17.4649	1.01036	4.43313
AV100	0.01	179.31	1.01029	3.3579
AV100	0.01	5.7456	0.90805	4.30599
AV100	0.01	0.8	0.902265	5.10829
AV100	0.01	11.9618	0.85709	4.63626
AV100	0.01	1.81925	0.874835	4.15428
AV100	0.01	6.81532	0.91637	4.758
AV100	0.01	40.3179	1.07997	2.77413
AV100	0.01	4.29825	0.933985	3.6762
AV100	0.01	0.8	0.943995	4.61064
AV100	0.01	0.8	0.872625	3.9754
AV100	0.01	2.57135	0.913575	4.13368
AV100	0.01	16.1114	0.93496	4.41369
AV100	0.01	29.8782	0.90649	5.11303
AV100	0.01	8.95086	0.88894	6.01887
AV100	0.01	21.3855	0.922545	3.67932
AV100	0.01	17.3964	0.9152	4.08707
AV100	0.01	4.61843	0.940485	4.21077
AV100	0.01	12.8772	1.0337	5.05297
AV100	0.01	16.6903	0.93392	4.84023
AV100	0.01	6.86335	0.914225	4.73909
AV100	0.01	0.8	0.931775	4.31438
AV100	0.01	1.67217	0.995735	3.31026
AV100	0.01	0.8	0.8918	3.74823
AV100	0.01	10.1862	0.926705	3.44929
AV100	0.01	5.8546	0.873925	5.42451
AV100	0.01	7.40015	0.857545	4.54162
AV100	0.01	4.14692	0.862615	4.26562
AV100	0.01	11.5731	0.94952	3.7919
AV100	0.01	13.2747	0.89765	5.7499
AV100	0.01	0.8	0.94224	4.24853
AV100	0.01	3.1567	0.93132	3.88687
AV100	0.01	0.8	0.9542	4.6421
AV100	0.01	16.3192	0.9308	3.64338
AV100	0.01	25.7335	0.89596	4.84633
AV100	0.01	11.5717	0.99775	4.20121
AV100	0.01	20.9484	0.92781	4.2599
AV100	0.01	46.6044	0.94315	4.44632

## Sheet: Fig1S2B
Strain	Arabinose (%)	RFP fluorescence (%)	Diameter	Length
AV101	10	170.728	1.02771	3.75609
AV101	10	537.741	1.05696	2.88529
AV101	10	151.192	1.09857	4.56001
AV101	10	339.359	1.01855	3.06982
AV101	10	268.477	1.02602	5.09581
AV101	10	232.69	1.15785	3.10134
AV101	10	159.186	1.02401	3.42803
AV101	10	170.349	1.0558	5.65337
AV101	10	199.707	1.08634	2.68463
AV101	10	236.187	1.11813	4.17014
AV101	10	249.343	1.06171	4.19296
AV101	10	181.153	1.12339	2.68378
AV101	10	159.275	1.03545	2.91291
AV101	10	226.855	1.07569	6.26626
AV101	10	165.615	1.1035	2.79546
AV101	10	318.641	1.06457	3.4101
AV101	10	179.563	1.16389	6.16869
AV101	10	246.337	1.10403	3.47178
AV101	10	250.168	1.04228	5.51863
AV101	10	210.897	1.11592	3.34568
AV101	10	141.512	1.02817	4.16474
AV101	10	312.774	1.10494	3.04798
AV101	10	350.565	0.966615	4.32517
AV101	10	218.082	1.05645	2.89367
AV101	10	210.409	1.06834	2.76913
AV101	10	236.932	1.07991	3.17239
AV101	10	584.822	1.0101	3.09601
AV101	10	181.129	0.988455	3.29829
AV101	10	228.969	0.96668	4.29631
AV101	10	245.459	1.01257	4.2328
AV101	10	261.842	1.02843	3.56089
AV101	10	357.126	0.995215	3.42959
AV101	10	336.353	0.95329	3.71137
AV101	10	317.817	0.978835	4.32165
AV101	10	193.727	1.09447	3.8987
AV101	10	169.211	1.07198	2.92695
AV101	10	364.202	1.30916	3.98099
AV101	10	175.384	1.03519	4.97452
AV101	10	302.184	1.00782	3.64852
AV101	10	289.111	1.0697	4.11424
AV101	10	255.098	1.04923	3.14626
AV101	10	238.639	1.02986	4.96821
AV101	10	159.308	1.0918	3.70981
AV101	10	301.328	1.02212	3.74244
AV101	10	344.354	0.94042	3.81556
AV101	10	181.146	1.04975	3.65306
AV101	10	237.111	1.00204	3.7312
AV101	10	265.885	1.02121	3.19546
AV101	10	296.929	1.15993	2.48105
AV101	10	204.621	1.02486	3.83721
AV101	10	204.199	1.07231	3.32449
AV101	10	161.598	1.1286	2.97134
AV101	10	219.128	1.04527	4.42279
AV101	10	321.03	1.03402	2.92584
AV101	10	161.323	1.04656	6.73075
AV101	10	150.29	0.980005	3.17155
AV101	10	180.774	1.04566	5.04082
AV101	10	277.942	0.995605	3.52729
AV101	10	245.149	1.03857	3.5763
AV101	10	269.249	1.0439	3.99302
AV101	10	232.293	0.97162	6.12391
AV101	10	139.954	1.09759	3.87244
AV101	10	199.056	1.10403	2.97609
AV101	10	215.514	1.074	7.14155
AV101	10	129.814	1.07237	5.33247
AV101	10	322.724	1.03317	3.0524
AV101	10	173.199	1.07647	2.82861
AV101	10	209.772	1.03096	2.98766
AV101	10	251.741	0.978445	3.39879
AV101	10	137.406	1.07543	4.43567
AV101	10	521.431	1.06119	3.10466
AV101	10	167.153	1.06847	3.5644
AV101	10	247.57	0.977925	3.47672
AV101	10	209.753	0.98124	3.48244
AV101	10	333.662	1.12047	2.6054
AV101	10	233.012	1.09681	3.84553
AV101	10	217.657	1.00951	3.7698
AV101	10	478.365	1.09278	2.75795
AV101	10	526.708	1.0023	3.53951
AV101	10	224.51	1.05124	2.8678
AV101	10	360.309	0.99346	3.71703
AV101	10	190.325	1.01569	3.50109
AV101	10	183.26	1.07204	2.77901
AV101	10	157.286	1.03018	4.2252
AV101	10	272.404	1.05183	4.77653
AV101	10	247.976	1.00171	4.9491
AV101	10	208.361	1.04747	6.4688
AV101	10	163.577	1.06008	6.6131
AV101	10	368.507	1.03382	3.12429
AV101	10	246.714	1.02655	4.52244
AV101	10	186.826	1.03292	5.15261
AV101	10	228.553	1.0736	5.22438
AV101	10	205.533	1.01615	3.22582
AV101	10	230.161	1.04306	3.71598
AV101	10	228.65	1.19321	4.60213
AV101	10	249.175	1.10259	5.60203
AV101	10	152.361	1.09148	2.73702
AV101	10	152.688	1.01537	3.4972
AV101	10	365.222	1.00276	3.46242
AV101	10	235.973	1.03655	3.52495
AV101	10	344.407	0.99346	3.82525
AV101	10	291.8	1.05358	5.16249
AV101	10	284.63	1.09746	3.06365
AV101	10	241.772	1.09363	4.01102
AV101	10	269.187	1.00588	3.24747
AV101	10	239.586	1.0675	3.52216
AV101	10	205.304	1.00211	4.56996
AV101	10	154.071	0.99229	3.03102
AV101	10	398.857	0.967785	4.48994
AV101	10	228.608	1.03201	4.272
AV101	10	152.674	1.06255	3.78183
AV101	10	483.263	0.988585	3.74543
AV101	10	252.427	0.966875	3.07541
AV101	10	279.655	1.0311	3.39437
AV101	10	276.336	1.03967	4.78673
AV101	10	172.804	1.05124	3.27392
AV101	10	228.695	1.00529	4.50957
AV101	10	233.228	1.00113	3.74075
AV101	10	294.714	0.986115	3.88778
AV101	10	162.987	1.07029	3.42374
AV101	10	578.438	1.05469	3.08392
AV101	10	242.877	1.04585	4.32133
AV101	10	263.984	0.998855	4.4683
AV101	10	143.217	1.06392	3.26768
AV101	10	173.715	1.07302	3.31039
AV101	10	206.622	1.05502	3.04063
AV101	10	238.964	0.98384	4.82053
AV101	10	284.17	1.14823	5.14904
AV101	10	469.236	1.00321	3.85989
AV101	10	346.081	1.02069	3.89753
AV101	10	148.164	1.06132	2.95106
AV101	10	367.381	0.97513	3.27476
AV101	10	212.699	1.04007	2.83673
AV101	10	150.483	1.06672	6.6053
AV101	10	219.061	1.10565	3.59229
AV101	10	193.906	1.0452	2.99943
AV101	10	144.62	1.0426	3.8077
AV101	10	212.838	1.05443	4.3719
AV101	10	244.699	1.01744	3.32274
AV101	10	194.678	1.12632	4.26861
AV101	10	226.536	1.08933	2.81476
AV101	10	309.36	1.03798	4.46797
AV101	10	311.031	1.05664	3.67582
AV101	10	244.536	0.989495	3.53932
AV101	10	656.856	0.996905	3.3815
AV101	10	338.798	1.03382	3.74491
AV101	10	509.954	0.970385	3.66814
AV101	10	220.797	1.0582	3.37961
AV101	10	258.314	1.04604	3.80445
AV101	10	289.485	1.04728	3.29881
AV101	10	462.678	1.04487	3.4112
AV101	10	203.454	1.06658	5.00162
AV101	10	189.028	1.06685	3.3917
AV101	10	133.294	1.07588	5.60924
AV101	10	219.149	1.07465	2.27312
AV101	10	259.483	1.10526	5.04303
AV101	10	263.905	0.960635	3.96338
AV101	10	249.613	1.00945	3.78144
AV101	10	240.458	1.10806	4.25549
AV101	10	175.218	1.07621	3.09088
AV101	10	147.548	1.06295	3.29881
AV101	10	235.058	1.10624	5.34462
AV101	10	197.275	1.01153	4.66758
AV101	10	231.111	1.03324	4.15564
AV101	10	116.007	1.00906	3.42329
AV101	10	141.726	1.05631	5.47332
AV101	10	134.955	1.06151	2.94502
AV101	10	194.857	1.06015	6.01854
AV101	10	182.991	1.12554	3.10134
AV101	10	135.141	0.97799	4.31808
AV101	10	401.088	1.00029	3.88915
AV101	10	289.745	1.03682	3.04239
AV101	10	211.459	0.997815	3.09484
AV101	10	289.396	0.97734	4.83262
AV101	10	209.212	1.1102	3.31227
AV101	10	218.763	0.96473	3.41406
AV101	10	280.25	0.970515	3.03661
AV101	10	154.543	1.11423	3.27399
AV101	10	195.816	1.05027	3.21802
AV101	10	144.804	1.08739	3.33339
AV101	10	280.08	1.04734	4.06217
AV101	10	320.77	0.992355	4.47759
AV101	10	411.744	1.06054	3.71104
AV101	10	199.652	1.14855	3.36004
AV101	10	208.161	1.04201	4.54005
AV101	10	153.453	1.07835	2.99871
AV101	10	225.741	1.02043	3.11727
AV101	10	327.223	1.11599	3.27542
AV101	10	166.337	1.00685	4.25913
AV101	10	228.007	1.06587	3.25702
AV101	10	169.257	1.06385	3.34653
AV101	10	364.443	0.989105	4.01563
AV101	10	317.155	0.989105	2.99962
AV101	10	207.346	1.01263	2.98974
AV101	10	174.233	1.05593	3.17961
AV101	10	227.34	1.05404	3.30642
AV101	10	189.04	1.07269	3.85814
AV101	10	325.218	1.03636	2.95906
AV101	10	196.646	1.11624	3.09043
AV101	10	177.941	1.00672	3.85976
AV101	10	175.906	1.04247	3.40899
AV101	10	264.411	1.06743	2.89783
AV101	10	268.469	1.05495	3.9986
AV101	10	275.752	0.98098	4.01609
AV101	10	282.126	1.07322	2.89829
AV101	10	314.398	0.997815	3.66665
AV101	10	314.604	1.10526	2.77199
AV101	10	223.397	1.06314	4.71497
AV101	10	164.498	1.136	4.03195
AV101	10	147.285	0.998595	3.65293
AV101	10	215.437	1.05014	4.59862
AV101	10	257.535	1.02433	3.52293
AV101	10	226.127	1.07536	3.72437
AV101	10	210.322	1.03682	3.37577
AV101	10	196.494	1.08998	3.15282
AV101	10	361.883	1.07133	3.00398
AV101	10	183.33	1.15251	6.19632
AV101	10	525.658	0.97253	3.393
AV101	10	275.173	1.06073	4.24847
AV101	10	253.931	1.01491	4.06517
AV101	10	177.922	1.06444	5.58584
AV101	10	195.754	1.06944	4.07771
AV101	10	284.72	0.966615	3.40555
AV101	10	381.705	1.02258	3.26833
AV101	10	162.467	1.04604	6.6469
AV101	10	178.794	1.07939	2.96426
AV101	10	250.834	1.01666	3.1239
AV101	10	318.382	0.992615	3.37642
AV101	10	168.096	1.04487	4.02447
AV101	10	181.828	1.03317	2.93975
AV101	10	138.679	1.13698	3.89434
AV101	10	211.883	0.9646	4.40109
AV101	10	252.987	1.04487	4.20186
AV101	10	314.738	1.02245	3.73938
AV101	10	267.347	1.07809	4.22877
AV101	10	209.033	1.00419	3.55933
AV101	10	222.437	1.10487	3.12208
AV101	10	212.177	1.05469	4.35091
AV101	10	215.658	1.0738	3.75719
AV101	10	279.391	0.986115	5.7523
AV101	10	165.089	1.12216	2.56841
AV101	10	246.414	1.08576	3.24214
AV101	10	181.873	1.10916	3.0095
AV101	10	336.459	1.03909	5.10549
AV101	10	299.466	1.02889	3.16979
AV101	10	218.629	1.07647	4.20251
AV101	10	269.291	1.02967	3.05649
AV101	10	172.541	1.05892	4.85297
AV101	10	348.958	0.980915	4.24833
AV101	10	180.095	0.962585	2.75977
AV101	10	162.144	1.07874	5.0386
AV101	10	408.237	0.971425	3.16875
AV101	10	238.722	1.10363	5.98091
AV101	10	185.97	1.0658	3.35237
AV101	10	232.643	1.03922	3.63876
AV101	10	201.381	1.08361	3.64696
AV101	10	358.1	1.02284	3.68459
AV101	10	365.147	1.0307	3.0979
AV101	10	356.312	1.26354	3.01516
AV101	10	257.889	1.105	2.7896
AV101	10	130.503	1.01225	3.84488
AV101	10	230.036	1.05235	3.03986
AV101	10	146.579	1.04462	2.98968
AV101	10	243.879	1.03935	4.43248
AV101	10	322.596	1.0307	3.11174
AV101	10	148.784	1.11092	4.54142
AV101	10	268.535	0.98878	2.77706
AV101	10	192.004	1.05059	4.26452
AV101	10	160.607	1.03311	2.95841
AV101	10	562.098	1.07971	2.90959
AV101	10	201.616	1.0086	3.23355
AV101	10	213.849	1.07055	6.18397
AV101	10	226.66	1.04702	3.18123
AV101	10	226.638	1.04585	2.99793
AV101	10	402.59	0.962	5.25193
AV101	10	356.269	1.01933	2.59967
AV101	10	291.478	1.02784	3.75375
AV101	10	159.416	1.03961	5.18447
AV101	10	459.796	1.06912	2.95659
AV101	10	210.897	0.94653	3.56681
AV101	10	320.301	0.944645	3.63343
AV101	10	251.184	1.08407	4.32555
AV101	10	316.734	1.03591	3.13203
AV101	10	193.789	1.08641	5.48581
AV101	10	340.954	1.03382	3.20158
AV101	10	260.523	1.03259	3.3581
AV101	10	161.485	1.03408	3.33093
AV101	10	209.545	1.07016	3.33281
AV101	10	155.852	1.02174	4.93597
AV101	10	166.629	1.02089	3.9314
AV101	10	150.739	1.10103	4.68975
AV101	10	190.985	1.05794	3.02107
AV101	10	218.063	1.10175	3.51319
AV101	10	110.759	1.00301	8.49875
AV101	10	341.113	1.08648	2.82594
AV101	10	159.893	1.07653	6.5234
AV101	10	329.644	1.08121	3.19559
AV101	10	180.738	1.02869	2.99981
AV101	10	170.458	1.08576	5.96863
AV101	10	197.174	1.07529	3.05942
AV101	10	327.665	1.0632	3.85606
AV101	10	144.145	1.07367	2.72389
AV101	10	221.903	1.01991	3.21744
AV101	10	220.928	1.06236	2.97459
AV101	10	285.353	1.09421	3.00697
AV101	10	316.144	1.04266	4.40486
AV101	10	204.976	1.06938	3.31578
AV101	10	438.729	1.03623	3.2812
AV101	10	199.525	1.0231	3.77065
AV101	10	176.589	1.07731	7.774
AV101	10	227.017	1.11963	3.47841
AV101	10	155.314	1.04774	4.7996
AV101	10	303.157	1.03714	2.72337
AV101	10	224.82	1.08758	6.40789
AV101	10	307.442	1.009	4.41701
AV101	10	132.313	0.973505	4.08765
AV101	10	385.001	1.09947	2.8988
AV101	10	326.398	1.08414	4.47434
AV101	10	311.666	0.98488	3.11103
AV101	10	218.448	1.05118	3.61374
AV101	10	268.992	1.0478	2.9913
AV101	10	195.667	1.00451	5.00403
AV101	10	302.072	1.00529	4.09896
AV101	10	151.494	1.06516	4.88241
AV101	10	323.002	1.05983	3.61719
AV101	10	185.554	1.06457	2.76198
AV101	10	165.274	1.07042	3.45865
AV101	10	124.532	1.07659	4.31353
AV101	10	224.6	1.07757	2.90245
AV101	10	215.786	1.09791	3.10837
AV101	10	216.226	1.0803	3.04421
AV101	10	160.968	1.01406	7.36645
AV101	10	188.354	1.02284	3.5579
AV101	10	193.335	1.08251	2.7731
AV101	10	307.797	1.1988	4.03091
AV101	10	174.529	1.09089	8.1263
AV101	10	260.89	1.02583	4.57554
AV101	10	169.017	1.03967	3.04454
AV101	10	163.988	1.05794	4.01037
AV101	10	254.979	1.04487	6.14042
AV101	10	174.733	0.9815	4.04385
AV101	10	251.157	1.05729	4.38035
AV101	10	253.144	1.06229	3.71677
AV101	10	258.786	1.0749	3.56882
AV101	10	370.727	1.05879	3.10407
AV101	10	336.364	1.0881	5.22048
AV101	10	463.184	1.04156	2.95945
AV101	10	201.78	1.06145	2.69549
AV101	10	248.205	1.03103	3.03219
AV101	10	231.871	1.00198	3.15257
AV101	10	124.988	1.07075	3.75642
AV101	10	269.445	0.968045	3.31702
AV101	10	170.996	1.06672	3.22647
AV101	10	177.667	1.02212	6.78925
AV101	10	430.259	1.01094	3.02172
AV101	10	394.211	1.1139	2.8702
AV101	10	178.248	0.977015	3.17824
AV101	10	250.41	1.28005	2.84551
AV101	10	134.626	1.05268	3.3228
AV101	10	285.148	1.08108	3.9509
AV101	10	290.433	1.13165	5.78181
AV101	10	315.471	1.02109	4.43638
AV101	10	201.571	1.03707	3.54738
AV101	10	325.021	1.0593	3.16407
AV101	10	127.919	1.11326	3.14041
AV101	10	299.515	1.01004	3.92256
AV101	10	165.396	1.04072	4.70678
AV101	10	189.207	1.00399	3.28614
AV101	10	149.379	1.10038	2.99812
AV101	10	364.169	1.05371	3.70643
AV101	10	419.156	1.02317	3.05526
AV101	0.1	67.1756	1.01452	3.24233
AV101	0.1	13.4397	1.02967	5.32753
AV101	0.1	5.24659	1.1039	5.15911
AV101	0.1	30.63	1.02798	2.48794
AV101	0.1	100.929	1.01965	3.33886
AV101	0.1	16.9279	0.9022	2.83042
AV101	0.1	33.308	0.94926	4.99064
AV101	0.1	56.897	0.96512	3.61433
AV101	0.1	114.041	0.97799	4.8449
AV101	0.1	42.9273	0.988455	4.00933
AV101	0.1	96.0249	0.96876	4.14004
AV101	0.1	28.5442	0.999115	3.21698
AV101	0.1	33.2488	0.9854	2.89822
AV101	0.1	24.8143	1.01816	3.42251
AV101	0.1	11.6953	0.914615	4.57431
AV101	0.1	17.9928	0.98735	4.21577
AV101	0.1	17.1199	1.01875	4.04176
AV101	0.1	37.9676	0.969995	3.5505
AV101	0.1	102.762	1.02746	5.10686
AV101	0.1	37.0702	1.11533	3.91255
AV101	0.1	65.8968	0.981305	3.40158
AV101	0.1	59.5865	0.92079	3.98294
AV101	0.1	22.5249	1.03785	3.56434
AV101	0.1	32.5882	0.9854	3.24591
AV101	0.1	9.42951	0.989885	4.09208
AV101	0.1	85.0308	1.03083	4.20777
AV101	0.1	17.7523	0.95589	4.26485
AV101	0.1	33.9404	1.04357	4.65582
AV101	0.1	65.1123	0.91572	3.74816
AV101	0.1	7.82674	1.0151	4.00237
AV101	0.1	19.8067	1.03642	4.51724
AV101	0.1	19.2912	0.986245	3.17876
AV101	0.1	99.2128	1.03298	4.04716
AV101	0.1	35.9337	0.942305	3.89337
AV101	0.1	35.4536	0.947375	3.47315
AV101	0.1	80.0628	0.96343	4.12165
AV101	0.1	79.0921	0.911885	5.30276
AV101	0.1	37.6502	1.02199	3.01242
AV101	0.1	38.5715	0.95251	3.75759
AV101	0.1	24.8964	0.99437	3.76922
AV101	0.1	22.7206	1.01946	3.57701
AV101	0.1	27.015	0.982995	4.41824
AV101	0.1	11.5184	1.00145	3.25033
AV101	0.1	36.0215	1.00873	4.60239
AV101	0.1	38.002	0.989365	3.94179
AV101	0.1	64.7599	1.05008	3.67237
AV101	0.1	11.0629	1.07153	3.59691
AV101	0.1	25.0434	1.00133	4.11106
AV101	0.1	16.888	0.96304	2.86734
AV101	0.1	81.9546	1.01972	4.34512
AV101	0.1	13.8182	0.993785	3.19865
AV101	0.1	11.8844	1.03604	2.71843
AV101	0.1	67.937	1.02096	3.84384
AV101	0.1	8.1442	0.95745	4.15688
AV101	0.1	29.0075	1.1585	3.48023
AV101	0.1	41.5387	1.01803	3.19449
AV101	0.1	20.8354	1.09129	2.91987
AV101	0.1	49.5103	1.02453	5.81015
AV101	0.1	11.083	1.07432	4.41993
AV101	0.1	254.9	0.945295	4.67519
AV101	0.1	37.3086	1.01875	4.52238
AV101	0.1	54.017	0.919945	3.64474
AV101	0.1	35.6859	0.993395	4.23065
AV101	0.1	23.0406	0.99671	5.564
AV101	0.1	23.2659	0.96863	3.50759
AV101	0.1	28.1402	1.08485	3.75635
AV101	0.1	65.8752	1.01751	4.20374
AV101	0.1	34.0617	1.04903	4.2172
AV101	0.1	54.1048	0.95511	4.57723
AV101	0.1	21.6104	0.952445	5.06155
AV101	0.1	7.82735	1.02836	4.15766
AV101	0.1	59.85	0.98085	2.97602
AV101	0.1	18.143	0.911495	3.88388
AV101	0.1	126.792	1.0515	4.23573
AV101	0.1	17.0557	0.96447	3.9325
AV101	0.1	37.1452	0.9633	5.11121
AV101	0.1	49.4385	0.955695	3.1341
AV101	0.1	181.52	1.0298	2.78505
AV101	0.1	18.8995	0.965315	3.89864
AV101	0.1	57.8681	1.08661	2.61801
AV101	0.1	20.806	1.03279	2.7874
AV101	0.1	118.374	1.00139	3.78755
AV101	0.1	34.4188	1.0829	2.91895
AV101	0.1	24.6866	0.95615	4.49358
AV101	0.1	45.6087	1.0125	3.70506
AV101	0.1	21.43	0.99567	4.542
AV101	0.1	66.9238	1.00126	4.77302
AV101	0.1	16.1578	0.977925	3.96838
AV101	0.1	46.4764	0.96967	3.95466
AV101	0.1	42.4472	1.01088	4.386
AV101	0.1	64.1882	0.979225	4.02272
AV101	0.1	37.113	0.944385	4.35909
AV101	0.1	47.5016	1.00276	3.49017
AV101	0.1	43.5737	0.962325	3.2801
AV101	0.1	39.2292	0.92898	5.24875
AV101	0.1	14.1716	0.9802	3.80568
AV101	0.1	48.9698	1.02252	3.88953
AV101	0.1	206.755	0.9464	3.84352
AV101	0.1	17.4648	1.05612	3.96415
AV101	0.1	22.9354	0.99242	3.39612
AV101	0.1	37.0998	1.01972	3.54035
AV101	0.1	32.2634	1.10715	4.39283
AV101	0.1	87.8316	1.0077	4.31503
AV101	0.1	27.0419	0.97058	3.97065
AV101	0.1	49.5456	1.00945	3.20645
AV101	0.1	25.418	0.91052	5.57993
AV101	0.1	52.812	0.98995	3.70572
AV101	0.1	37.5538	1.00126	4.45354
AV101	0.1	37.3102	1.03486	5.21671
AV101	0.1	36.373	0.999895	3.37558
AV101	0.1	32.3778	0.967785	4.55305
AV101	0.1	31.6199	0.978965	4.37509
AV101	0.1	15.9904	0.902265	5.12115
AV101	0.1	24.9392	0.98956	4.33667
AV101	0.1	7.77574	1.03317	5.78136
AV101	0.1	20.8824	0.90168	3.98944
AV101	0.1	8.65611	1.04266	3.48393
AV101	0.1	45.0166	0.94315	3.78865
AV101	0.1	42.2503	0.994955	3.92275
AV101	0.1	13.2376	0.96811	4.37352
AV101	0.1	54.8375	0.98709	4.69742
AV101	0.1	20.034	0.98189	3.73074
AV101	0.1	82.4641	1.02687	3.38429
AV101	0.1	94.2916	1.04923	3.93412
AV101	0.1	31.6309	1.01803	3.19546
AV101	0.1	41.4139	0.95342	3.35361
AV101	0.1	79.8472	0.977535	3.5217
AV101	0.1	114.64	1.04416	3.05071
AV101	0.1	29.9234	0.943605	3.57292
AV101	0.1	34.8942	0.997555	3.48998
AV101	0.1	36.4576	0.99489	4.01804
AV101	0.1	68.0376	0.943865	4.80396
AV101	0.1	50.3824	0.958425	4.11287
AV101	0.1	15.8134	1.01406	3.61504
AV101	0.1	57.7273	0.92716	4.47642
AV101	0.1	67.1329	1.00789	3.62732
AV101	0.1	25.2795	0.97838	4.44503
AV101	0.1	30.4615	0.988975	3.40099
AV101	0.1	23.6258	1.0077	4.46849
AV101	0.1	25.1177	0.962585	5.1064
AV101	0.1	22.1101	1.04286	4.52445
AV101	0.1	40.8656	0.937235	3.58748
AV101	0.1	22.0441	1.00757	4.89762
AV101	0.1	47.7016	1.02446	3.74699
AV101	0.1	48.3758	1.06028	3.54549
AV101	0.1	88.8794	0.98345	4.35675
AV101	0.1	14.7663	1.01179	4.27895
AV101	0.1	27.4943	0.980395	4.27914
AV101	0.1	21.8063	1.05664	3.22706
AV101	0.1	24.5423	1.0478	2.96589
AV101	0.1	46.3305	1.06184	3.56733
AV101	0.1	15.0002	1.18404	2.49145
AV101	0.1	7.81649	1.16961	3.23154
AV101	0.1	46.7241	1.05917	2.56964
AV101	0.1	212.175	1.02395	3.3867
AV101	0.1	21.7423	1.02551	3.70838
AV101	0.1	47.5559	0.937885	3.90936
AV101	0.1	1.11367	1.77697	2.90076
AV101	0.1	138.598	0.94315	3.54841
AV101	0.1	41.3801	1.00029	3.0279
AV101	0.01	3.42466	0.90987	5.59559
AV101	0.01	0.8	0.89414	5.37498
AV101	0.01	8.29911	0.908505	3.91612
AV101	0.01	4.13616	0.91052	4.04957
AV101	0.01	7.07388	0.964275	4.80603
AV101	0.01	12.8042	0.95017	4.50216
AV101	0.01	6.66376	0.94068	3.91151
AV101	0.01	0.8	0.93327	5.22808
AV101	0.01	6.45089	0.945945	4.06289
AV101	0.01	7.74005	1.01784	5.3443
AV101	0.01	8.60681	0.99437	3.6099
AV101	0.01	2.3856	0.93093	4.27109
AV101	0.01	0.909873	1.00614	4.06841
AV101	0.01	6.80942	1.0088	4.64809
AV101	0.01	1.22165	0.95498	5.02333
AV101	0.01	8.71334	0.97513	4.8711
AV101	0.01	18.3363	0.99528	3.62037
AV101	0.01	3.88444	0.904735	4.73889
AV101	0.01	8.67201	0.95875	4.97224
AV101	0.01	3.60048	0.91078	4.89242
AV101	0.01	8.87729	0.98371	4.09377
AV101	0.01	19.8832	0.981435	3.56467
AV101	0.01	23.7268	0.96733	4.48838
AV101	0.01	3.62335	0.983775	4.33413
AV101	0.01	5.39302	0.955825	5.30771
AV101	0.01	1.77941	0.900835	5.02905
AV101	0.01	2.24419	0.950365	3.58663
AV101	0.01	2.29866	0.969215	3.24227
AV101	0.01	7.53262	0.903175	4.96321
AV101	0.01	9.42904	0.94419	3.68777
AV101	0.01	7.14815	1.00015	3.30811
AV101	0.01	3.54958	0.93834	5.14677
AV101	0.01	3.16022	0.94224	3.53633
AV101	0.01	0.8	0.89713	3.86763
AV101	0.01	6.49716	0.90948	4.07036
AV101	0.01	7.81432	0.98384	4.06881
AV101	0.01	8.70152	0.92014	3.86224
AV101	0.01	11.9757	0.949065	3.50038
AV101	0.01	14.2338	0.89622	4.30969
AV101	0.01	2.1887	0.99008	3.87068
AV101	0.01	5.05171	0.87828	6.32508
AV101	0.01	6.774	0.97955	4.12094
AV101	0.01	4.69057	0.960895	4.98407
AV101	0.01	10.6118	1.01276	3.64442

## Sheet: Fig1S4_PBP1a
Strain	Guide	Replicate	RFP fluorescence
AV47	RØ	A	14253.3
AV47	RØ	A	8425.82
AV47	RØ	A	10313.5
AV47	RØ	A	9458.27
AV47	RØ	A	10786.2
AV47	RØ	A	7122.49
AV47	RØ	A	9321.72
AV47	RØ	A	8529.44
AV47	RØ	A	8600.97
AV47	RØ	A	13719.1
AV47	RØ	A	12713.2
AV47	RØ	A	8659.21
AV47	RØ	A	7765.99
AV47	RØ	A	9220.99
AV47	RØ	A	7753.1
AV47	RØ	A	15291.4
AV47	RØ	A	7223.65
AV47	RØ	A	7885.53
AV47	RØ	A	11584.1
AV47	RØ	A	7846.41
AV47	RØ	A	10630.8
AV47	RØ	A	10843.6
AV47	RØ	A	7567.7
AV47	RØ	A	12684.1
AV47	RØ	A	8863.89
AV47	RØ	A	9763.8
AV47	RØ	A	15179.6
AV47	RØ	A	10174.5
AV47	RØ	A	9025.29
AV47	RØ	A	10261.8
AV47	RØ	A	13141
AV47	RØ	A	16271.7
AV47	RØ	A	11994
AV47	RØ	A	6173.86
AV47	RØ	A	15847.5
AV47	RØ	A	8606.2
AV47	RØ	A	8728.59
AV47	RØ	A	13704.3
AV47	RØ	A	11629.3
AV47	RØ	A	12251.2
AV47	RØ	A	19304.4
AV47	RØ	A	12504
AV47	RØ	A	7411.49
AV47	RØ	A	9229.84
AV47	RØ	A	9377.12
AV47	RØ	A	12692.4
AV47	RØ	A	8784.85
AV47	RØ	A	15396.9
AV47	RØ	A	8789.37
AV47	RØ	A	10092
AV47	RØ	A	11027.4
AV47	RØ	A	7644.74
AV47	RØ	A	17315.3
AV47	RØ	A	10434.9
AV47	RØ	A	11461.2
AV47	RØ	A	11887.6
AV47	RØ	A	8541.67
AV47	RØ	A	6295.51
AV47	RØ	A	9011.91
AV47	RØ	A	11249.2
AV47	RØ	A	8576.1
AV47	RØ	A	6254.45
AV47	RØ	A	5362.88
AV47	RØ	A	14136.7
AV47	RØ	A	5881.01
AV47	RØ	A	18334.8
AV47	RØ	A	9356.75
AV47	RØ	A	12271
AV47	RØ	A	11679.9
AV47	RØ	A	9339.61
AV47	RØ	A	9144.43
AV47	RØ	A	12381.5
AV47	RØ	A	6159.7
AV47	RØ	A	21448.7
AV47	RØ	A	9201.8
AV47	RØ	A	11603.9
AV47	RØ	A	8817.94
AV47	RØ	A	7973.53
AV47	RØ	A	20489.3
AV47	RØ	A	17864.2
AV47	RØ	A	8362.8
AV47	RØ	A	10393.1
AV47	RØ	A	15534.6
AV47	RØ	A	8710.98
AV47	RØ	A	10814.1
AV47	RØ	A	10650.8
AV47	RØ	A	12015.4
AV47	RØ	A	11076
AV47	RØ	A	6268.15
AV47	RØ	A	15276.4
AV47	RØ	A	6217.55
AV47	RØ	A	9273.73
AV47	RØ	A	10268
AV47	RØ	A	12502
AV47	RØ	A	7155.01
AV47	RØ	A	12458.5
AV47	RØ	A	8129.67
AV47	RØ	A	9650.09
AV47	RØ	A	18017.5
AV47	RØ	A	11585
AV47	RØ	A	13385.8
AV47	RØ	A	12434.8
AV47	RØ	A	17846.8
AV47	RØ	A	12503.3
AV47	RØ	A	10243.8
AV47	RØ	A	11883.8
AV47	RØ	A	9377.68
AV47	RØ	A	12229.7
AV47	RØ	A	8401.52
AV47	RØ	A	9688.27
AV47	RØ	A	10612
AV47	RØ	A	12253.2
AV47	RØ	A	7354.84
AV47	RØ	A	13313.1
AV47	RØ	A	17568.9
AV47	RØ	A	14489.6
AV47	RØ	A	17876.6
AV47	RØ	A	12782.2
AV47	RØ	A	8862.33
AV47	RØ	A	11634.2
AV47	RØ	A	10051.7
AV47	RØ	A	16080.9
AV47	RØ	A	8038.07
AV47	RØ	A	11644.3
AV47	RØ	A	15913.4
AV47	RØ	A	11796.5
AV47	RØ	A	8272.04
AV47	RØ	A	12961.8
AV47	RØ	A	11427.6
AV47	RØ	A	17780.2
AV47	RØ	A	13728.6
AV47	RØ	A	10359.7
AV47	RØ	A	20547.6
AV47	RØ	A	19171.6
AV47	RØ	A	13954.3
AV47	RØ	A	13508.4
AV47	RØ	A	10246.6
AV47	RØ	A	19589.7
AV47	RØ	A	9322.65
AV47	RØ	A	5466.53
AV47	RØ	A	13919.1
AV47	RØ	A	9143.26
AV47	RØ	A	18883
AV47	RØ	A	16498.4
AV47	RØ	A	9178.35
AV47	RØ	A	11727
AV47	RØ	A	9191.41
AV47	RØ	A	13680.4
AV47	RØ	A	10401
AV47	RØ	A	9179.72
AV47	RØ	A	11143
AV47	RØ	A	16245.9
AV47	RØ	A	12453
AV47	RØ	A	10668.1
AV47	RØ	A	12108.9
AV47	RØ	A	20050.2
AV47	RØ	A	7710.53
AV47	RØ	A	13885.9
AV47	RØ	A	7948.45
AV47	RØ	A	10796.3
AV47	RØ	A	9519.28
AV47	RØ	A	7221.72
AV47	RØ	A	8958.37
AV47	RØ	A	7003.3
AV47	RØ	A	26820.4
AV47	RØ	A	9044.28
AV47	RØ	A	10779.5
AV47	RØ	A	10979.1
AV47	RØ	A	7772.63
AV47	RØ	A	15578.1
AV47	RØ	A	10917.5
AV47	RØ	A	10872.8
AV47	RØ	A	10874.7
AV47	RØ	A	7422.88
AV47	RØ	A	11380.3
AV47	RØ	A	28669.5
AV47	RØ	A	7253.02
AV47	RØ	A	11611.9
AV47	RØ	A	8142.42
AV47	RØ	A	11313.1
AV47	RØ	A	20218.6
AV47	RØ	A	9670.68
AV47	RØ	A	12733.5
AV47	RØ	A	12579.4
AV47	RØ	A	13069.6
AV47	RØ	A	7645.72
AV47	RØ	A	6628.82
AV47	RØ	A	11226.6
AV47	RØ	A	11385.8
AV47	RØ	A	8944.27
AV47	RØ	A	12179.4
AV47	RØ	A	5755.76
AV47	RØ	A	10241.7
AV47	RØ	A	6443.82
AV47	RØ	A	6378.82
AV47	RØ	A	14880.2
AV47	RØ	A	7915.23
AV47	RØ	A	9978.35
AV47	RØ	A	4849.63
AV47	RØ	A	8982.9
AV47	RØ	A	7420.23
AV47	RØ	A	11686.7
AV47	RØ	A	8260.32
AV47	RØ	A	22962.5
AV47	RØ	A	8389.39
AV47	RØ	A	15104.9
AV47	RØ	A	16305.6
AV47	RØ	A	12070.6
AV47	RØ	A	6328.96
AV47	RØ	A	8824.46
AV47	RØ	A	6615.49
AV47	RØ	A	6879.61
AV47	RØ	A	7409.23
AV47	RØ	A	20181.9
AV47	RØ	A	8697.29
AV47	RØ	A	7313.42
AV47	RØ	A	10530.8
AV47	RØ	A	8241.6
AV47	RØ	A	11450.7
AV47	RØ	A	11909.1
AV47	RØ	A	7773.17
AV47	RØ	A	14336.2
AV47	RØ	A	8379.03
AV47	RØ	A	10628.6
AV47	RØ	A	10547.2
AV47	RØ	A	18782.1
AV47	RØ	A	10481.3
AV47	RØ	A	11394.5
AV47	RØ	A	10387.6
AV47	RØ	A	6767.83
AV47	RØ	A	12137.2
AV47	RØ	A	6999.06
AV47	RØ	A	12106.5
AV47	RØ	A	8607.82
AV47	RØ	A	13031.8
AV47	RØ	A	7837.91
AV47	RØ	A	9112.21
AV47	RØ	A	12260.7
AV47	RØ	A	12661.2
AV47	RØ	A	8692.3
AV47	RØ	A	14410.3
AV47	RØ	A	15289.1
AV47	RØ	A	8121.27
AV47	RØ	A	9975.29
AV47	RØ	A	12118
AV47	RØ	A	6996.77
AV47	RØ	A	8229.67
AV47	RØ	A	11031.1
AV47	RØ	A	9360.62
AV47	RØ	A	8232.29
AV47	RØ	A	9991.23
AV47	RØ	A	15592.8
AV47	RØ	A	12382.9
AV47	RØ	A	8627.27
AV47	RØ	A	13273
AV47	RØ	A	8218.98
AV47	RØ	A	8401.49
AV47	RØ	A	9814.28
AV47	RØ	A	7463.76
AV47	RØ	A	16560.8
AV47	RØ	A	25223.1
AV47	RØ	A	6600.5
AV47	RØ	A	13126.2
AV47	RØ	A	13304.9
AV47	RØ	A	18519.9
AV47	RØ	A	9882.2
AV47	RØ	A	11108
AV47	RØ	A	10683.3
AV47	RØ	A	17122.9
AV47	RØ	A	8359.07
AV47	RØ	A	8493.77
AV47	RØ	A	10486
AV47	RØ	A	10886
AV47	RØ	A	10107.6
AV47	RØ	A	6618.01
AV47	RØ	A	8802.67
AV47	RØ	A	6367.34
AV47	RØ	A	8719.72
AV47	RØ	A	9335.05
AV47	RØ	A	5577.26
AV47	RØ	A	8246.5
AV47	RØ	A	14366.3
AV47	RØ	A	8323.49
AV47	RØ	A	7753.23
AV47	RØ	A	13030
AV47	RØ	A	9651.46
AV47	RØ	A	15104.5
AV47	RØ	A	13240.9
AV47	RØ	A	10136.7
AV47	RØ	A	6138.61
AV47	RØ	A	7101.37
AV47	RØ	A	17553.2
AV47	RØ	A	8090.49
AV47	RØ	A	8270.38
AV47	RØ	A	10351.7
AV47	RØ	A	20924.2
AV47	RØ	A	10074.3
AV47	RØ	A	7916.85
AV47	RØ	A	14264.3
AV47	RØ	A	17248.5
AV47	RØ	A	10895.5
AV47	RØ	A	6350.11
AV47	RØ	A	7180.09
AV47	RØ	A	10856
AV47	RØ	A	10007.9
AV47	RØ	A	9544.73
AV47	RØ	A	8706
AV47	RØ	A	21369
AV47	RØ	A	9006.79
AV47	RØ	A	6027
AV47	RØ	A	4996.76
AV47	RØ	A	8800.21
AV47	RØ	A	10574.6
AV47	RØ	A	9397.69
AV47	RØ	A	7620
AV47	RØ	A	8835.7
AV47	RØ	A	7612.09
AV47	RØ	A	9183.27
AV47	RØ	A	10928.9
AV47	RØ	A	16425.5
AV47	RØ	A	8519.7
AV47	RØ	A	8567.6
AV47	RØ	A	10096
AV47	RØ	A	12440.6
AV47	RØ	A	12806
AV47	RØ	A	11274
AV47	RØ	A	7647.24
AV47	RØ	A	10438.8
AV47	RØ	A	9788.05
AV47	RØ	A	8831.32
AV47	RØ	A	14068.2
AV47	RØ	A	10938.6
AV47	RØ	A	8923.52
AV47	RØ	A	6464.58
AV47	RØ	A	7818.13
AV47	RØ	A	6220.59
AV47	RØ	A	12600.4
AV47	RØ	A	16479.6
AV47	RØ	A	12171.6
AV47	RØ	A	14083
AV47	RØ	A	9622.98
AV47	RØ	A	6902.64
AV47	RØ	A	6973.07
AV47	RØ	A	12212.3
AV47	RØ	A	8238.92
AV47	RØ	A	9006.37
AV47	RØ	A	10127.4
AV47	RØ	A	8268.38
AV47	RØ	A	10370.9
AV47	RØ	A	9493.05
AV47	RØ	A	8143.73
AV47	RØ	A	12115.7
AV47	RØ	A	7665.33
AV47	RØ	A	10127
AV47	RØ	A	14115.6
AV47	RØ	A	11205.5
AV47	RØ	A	11779.1
AV47	RØ	A	10909
AV47	RØ	A	10297.1
AV47	RØ	A	9054.14
AV47	RØ	A	12823.7
AV47	RØ	A	10280.9
AV47	RØ	A	13183.7
AV47	RØ	A	14169.4
AV47	RØ	A	8643.46
AV47	RØ	A	10781.6
AV47	RØ	A	8455.8
AV47	RØ	A	13176.8
AV47	RØ	A	12537
AV47	RØ	A	9400.11
AV47	RØ	A	6463.71
AV47	RØ	A	7187.24
AV47	RØ	A	11033.3
AV47	RØ	A	8786.24
AV47	RØ	A	8164.71
AV47	RØ	A	12529.7
AV47	RØ	A	11953.1
AV47	RØ	A	7141.9
AV47	RØ	A	7698.01
AV47	RØ	A	7783.06
AV47	RØ	A	9300.04
AV47	RØ	A	12187.6
AV47	RØ	A	8734.44
AV47	RØ	A	8726.44
AV47	RØ	A	10249.5
AV47	RØ	A	9926.8
AV47	RØ	A	7347.27
AV47	RØ	A	11400.2
AV47	RØ	A	12012.4
AV47	RØ	A	8598.98
AV47	RØ	A	7598.37
AV47	RØ	A	6967.75
AV47	RØ	A	14907.1
AV47	RØ	A	12233.5
AV47	RØ	A	7115.2
AV47	RØ	A	10774.6
AV47	RØ	A	5943.4
AV47	RØ	A	13413.1
AV47	RØ	A	11565.2
AV47	RØ	A	11469.4
AV47	RØ	A	8147.95
AV47	RØ	A	7256.68
AV47	RØ	A	11161.7
AV47	RØ	A	7142.52
AV47	RØ	A	12642.8
AV47	RØ	A	9192.64
AV47	RØ	A	11220.3
AV47	RØ	A	8747.53
AV47	RØ	A	5257.28
AV47	RØ	A	12846.2
AV47	RØ	A	5621.09
AV47	RØ	A	10973.2
AV47	RØ	A	8158.06
AV47	RØ	A	13057.8
AV47	RØ	A	9984.66
AV47	RØ	A	16013.6
AV47	RØ	A	8325.25
AV47	RØ	A	6832.13
AV47	RØ	A	10699.6
AV47	RØ	A	12916.1
AV47	RØ	A	31177.5
AV47	RØ	A	7845.25
AV47	RØ	A	11936.8
AV47	RØ	A	10320
AV47	RØ	A	14335.4
AV47	RØ	A	9338.15
AV47	RØ	A	8117.38
AV47	RØ	A	6009.97
AV47	RØ	A	7374.36
AV47	RØ	A	12579.8
AV47	RØ	A	5763.51
AV47	RØ	A	12368.5
AV47	RØ	A	7595.09
AV47	RØ	A	8648.29
AV47	RØ	A	6972.17
AV47	RØ	A	6422.71
AV47	RØ	A	11964.6
AV47	RØ	A	6895.52
AV47	RØ	A	7611.77
AV47	RØ	A	9555.32
AV47	RØ	A	8541.56
AV47	RØ	A	9548.54
AV47	RØ	A	6016.42
AV47	RØ	A	9031.53
AV47	RØ	A	11363.8
AV47	RØ	A	12345.8
AV47	RØ	A	13657.8
AV47	RØ	A	8722.49
AV47	RØ	A	8173.69
AV47	RØ	A	8988.29
AV47	RØ	A	8792.12
AV47	RØ	A	9543.48
AV47	RØ	A	8410.5
AV47	RØ	A	12014.9
AV47	RØ	A	9063.22
AV47	RØ	A	10698.8
AV47	RØ	A	10777.3
AV47	RØ	A	9017.01
AV47	RØ	A	12110.4
AV47	RØ	A	8672.01
AV47	RØ	A	5210.47
AV47	RØ	A	7013.95
AV47	RØ	A	9347.79
AV47	RØ	A	15086.6
AV47	RØ	A	13918.3
AV47	RØ	A	9760.96
AV47	RØ	A	11602.3
AV47	RØ	A	13156
AV47	RØ	A	5862.55
AV47	RØ	A	18878.5
AV47	RØ	A	10451.8
AV47	RØ	A	13131.5
AV47	RØ	A	10038.3
AV47	RØ	A	9680.47
AV47	RØ	A	6897.78
AV47	RØ	A	9767.48
AV47	RØ	A	10138.5
AV47	RØ	A	8418.03
AV47	RØ	A	11161.7
AV47	RØ	A	11235.2
AV47	RØ	A	13910.4
AV47	RØ	A	11814
AV47	RØ	A	8651.85
AV47	RØ	A	36070.4
AV47	RØ	A	9508.38
AV47	RØ	A	8636.62
AV47	RØ	A	14539.7
AV47	RØ	A	10933.1
AV47	RØ	A	7844.09
AV47	RØ	A	15652.2
AV47	RØ	A	8149.66
AV47	RØ	A	9788.58
AV47	RØ	A	8897.73
AV47	RØ	A	9122.76
AV47	RØ	A	7813.65
AV47	RØ	A	12358.5
AV47	RØ	A	10299.2
AV47	RØ	A	8326.05
AV47	RØ	A	14211
AV47	RØ	A	10040.7
AV47	RØ	A	26445.8
AV47	RØ	A	10249.8
AV47	RØ	A	16422.6
AV47	RØ	A	18754.8
AV47	RØ	A	8870.6
AV47	RØ	A	8542.3
AV47	RØ	A	9714.9
AV47	RØ	A	12485.3
AV47	RØ	A	7704.45
AV47	RØ	A	16847.8
AV47	RØ	A	13498.9
AV47	RØ	A	8390.02
AV47	RØ	A	6128.92
AV47	RØ	A	18288.7
AV47	RØ	A	14434.1
AV47	RØ	A	10240.6
AV47	RØ	A	14314.9
AV47	RØ	A	13505.9
AV47	RØ	A	10325
AV47	RØ	A	7422.16
AV47	RØ	A	12077.4
AV47	RØ	A	7248.03
AV47	RØ	A	9750.62
AV47	RØ	A	11333.6
AV47	RØ	A	10179.7
AV47	RØ	A	9621.33
AV47	RØ	A	36346.5
AV47	RØ	A	10622.4
AV47	RØ	A	9214.07
AV47	RØ	A	29280.7
AV47	RØ	A	7038.34
AV47	RØ	A	13678.3
AV47	RØ	A	10888.2
AV47	RØ	A	11284.1
AV47	RØ	A	14111
AV47	RØ	A	8996.2
AV47	RØ	A	11374.4
AV47	RØ	A	11789.9
AV47	RØ	A	8031.32
AV47	RØ	A	10912.2
AV47	RØ	A	9844.78
AV47	RØ	A	13290.6
AV47	RØ	A	7059.78
AV47	RØ	A	12534.8
AV47	RØ	A	7930.19
AV47	RØ	A	7366.76
AV47	RØ	A	8918.04
AV47	RØ	A	16845.7
AV47	RØ	A	11785.1
AV47	RØ	A	13460.4
AV47	RØ	A	10119
AV47	RØ	A	8332.38
AV47	RØ	A	16414.6
AV47	RØ	A	7378.88
AV47	RØ	A	15470.3
AV47	RØ	A	10439.9
AV47	RØ	A	7507.43
AV47	RØ	A	8510.27
AV47	RØ	A	10313.9
AV47	RØ	A	11194.3
AV47	RØ	A	25290.1
AV47	RØ	A	5952.32
AV47	RØ	A	35186.1
AV47	RØ	A	10799.4
AV47	RØ	A	7880.95
AV47	RØ	A	7648.63
AV47	RØ	A	11886.8
AV47	RØ	A	9284.25
AV47	RØ	A	9302.77
AV47	RØ	A	11323.2
AV47	RØ	A	13496.9
AV47	RØ	A	33626.5
AV47	RØ	A	9369.39
AV47	RØ	A	10398.4
AV47	RØ	A	15297.9
AV47	RØ	A	13845
AV47	RØ	A	12673
AV47	RØ	A	14356.8
AV47	RØ	A	26411.9
AV47	RØ	A	12306.7
AV47	RØ	A	16415.8
AV47	RØ	A	10226.7
AV47	RØ	A	11360.3
AV47	RØ	A	9616.68
AV47	RØ	A	14047.8
AV47	RØ	A	12466.6
AV47	RØ	A	13465.5
AV47	RØ	A	6518.49
AV47	RØ	A	16977.6
AV47	RØ	A	14687.1
AV47	RØ	A	7735.05
AV47	RØ	A	9204.14
AV47	RØ	A	17324.7
AV47	RØ	A	22523.3
AV47	RØ	A	9139.66
AV47	RØ	A	5794.86
AV47	RØ	A	14888.3
AV47	RØ	A	9332.03
AV47	RØ	A	14545.8
AV47	RØ	A	11417.8
AV47	RØ	A	9804.39
AV47	RØ	A	28225.3
AV47	RØ	A	9731.82
AV47	RØ	A	8522.75
AV47	RØ	A	28998.5
AV47	RØ	A	6464.21
AV47	RØ	A	10509.2
AV47	RØ	A	11811.6
AV47	RØ	A	10097.3
AV47	RØ	A	4854.79
AV47	RØ	A	14876.8
AV47	RØ	A	9258.61
AV47	RØ	A	9586.79
AV47	RØ	A	9620.15
AV47	RØ	A	13534.3
AV47	RØ	A	17923.9
AV47	RØ	A	10930.2
AV47	RØ	A	16279.7
AV47	RØ	A	24977.5
AV47	RØ	A	12736
AV47	RØ	A	10192.6
AV47	RØ	A	5866.39
AV47	RØ	A	9165.67
AV47	RØ	A	14884.2
AV47	RØ	A	10632.3
AV47	RØ	A	11758.9
AV47	RØ	A	19624.3
AV47	RØ	A	5734.96
AV47	RØ	A	7769.1
AV47	RØ	A	13558.5
AV47	RØ	A	7692.37
AV47	RØ	A	18920.5
AV47	RØ	A	9920.22
AV47	RØ	A	9394.78
AV47	RØ	A	7388.37
AV47	RØ	A	5686.43
AV47	RØ	A	9345.31
AV47	RØ	A	19758.3
AV47	RØ	A	11855
AV47	RØ	A	8176.05
AV47	RØ	A	5600.27
AV47	RØ	A	4783.61
AV47	RØ	A	6165.19
AV47	RØ	A	10572
AV47	RØ	A	15750.6
AV47	RØ	A	9622.84
AV47	RØ	A	9870.48
AV47	RØ	A	9982.27
AV47	RØ	A	10242.8
AV47	RØ	A	14953.7
AV47	RØ	A	9893.54
AV47	RØ	A	9072.13
AV47	RØ	A	7236.96
AV47	RØ	A	8589.01
AV47	RØ	A	10920.4
AV47	RØ	A	8156.76
AV47	RØ	A	10981.6
AV47	RØ	A	9331.25
AV47	RØ	A	8957.64
AV47	RØ	A	14483.7
AV47	RØ	A	12855.7
AV47	RØ	A	16588.4
AV47	RØ	A	9904.94
AV47	RØ	A	17107.1
AV47	RØ	A	8385.7
AV47	RØ	A	9648.05
AV47	RØ	A	7406.01
AV47	RØ	A	12058.3
AV47	RØ	A	7854.09
AV47	RØ	A	8034.12
AV47	RØ	A	8465.53
AV47	RØ	A	13683.1
AV47	RØ	A	25804.6
AV47	RØ	A	14188.5
AV47	RØ	A	7256.34
AV47	RØ	A	8075.12
AV47	RØ	A	13276.1
AV47	RØ	A	10848.3
AV47	RØ	A	10412
AV47	RØ	A	5104.57
AV47	RØ	A	10039.5
AV47	RØ	A	9040.04
AV47	RØ	A	22418.5
AV47	RØ	A	16602.7
AV47	RØ	A	7464.93
AV47	RØ	A	10004.4
AV47	RØ	A	10763.4
AV47	RØ	A	13211.4
AV47	RØ	A	11506.5
AV47	RØ	A	16845.4
AV47	RØ	A	8241.98
AV47	RØ	A	6301.65
AV47	RØ	A	7893.92
AV47	RØ	A	12579.8
AV47	RØ	A	9194.57
AV47	RØ	A	9608.92
AV47	RØ	A	10388
AV47	RØ	A	11883.4
AV47	RØ	A	15009.2
AV47	RØ	A	9406.04
AV47	RØ	A	9625.47
AV47	RØ	A	12355.4
AV47	RØ	A	9089.03
AV47	RØ	A	31422.7
AV47	RØ	A	14655.4
AV47	RØ	A	14226.7
AV47	RØ	A	9190.41
AV47	RØ	A	10368.2
AV47	RØ	A	13462
AV47	RØ	A	13189.5
AV47	RØ	A	7785.41
AV47	RØ	A	10639
AV47	RØ	A	26491
AV47	RØ	A	19767
AV47	RØ	A	12096.4
AV47	RØ	A	16703.9
AV47	RØ	A	10524
AV47	RØ	A	15567.3
AV47	RØ	A	11976.9
AV47	RØ	A	10274.3
AV47	RØ	A	10262.6
AV47	RØ	A	9075.27
AV47	RØ	A	14462.4
AV47	RØ	A	10179
AV47	RØ	A	20802.7
AV47	RØ	A	9442.05
AV47	RØ	A	4849.08
AV47	RØ	A	10462.2
AV47	RØ	A	14995.8
AV47	RØ	A	8680.88
AV47	RØ	A	11052.7
AV47	RØ	A	13357.5
AV47	RØ	A	9164.48
AV47	RØ	A	11381.8
AV47	RØ	A	10292.1
AV47	RØ	A	13552.3
AV47	RØ	A	10975.2
AV47	RØ	A	16345.3
AV47	RØ	A	14280.8
AV47	RØ	A	14197.9
AV47	RØ	A	7961.76
AV47	RØ	A	8140.7
AV47	RØ	A	10047.6
AV47	RØ	A	11140.4
AV47	RØ	A	23870.2
AV47	RØ	A	31067.2
AV47	RØ	A	10881.6
AV47	RØ	A	9679.26
AV47	RØ	A	10693
AV47	RØ	A	13032
AV47	RØ	A	11061.2
AV47	RØ	A	12003.5
AV47	RØ	A	7220.43
AV47	RØ	A	18145.4
AV47	RØ	A	10655.1
AV47	RØ	A	12916
AV47	RØ	A	7309.37
AV47	RØ	A	12223.4
AV47	RØ	A	10758.9
AV47	RØ	A	10576.1
AV47	RØ	A	8288.68
AV47	RØ	A	44417
AV47	RØ	A	8152.84
AV47	RØ	A	8928.53
AV47	RØ	A	15702.6
AV47	RØ	A	11225.5
AV47	RØ	A	10885.9
AV47	RØ	A	10021.8
AV47	RØ	A	9264.84
AV47	RØ	A	10349.4
AV47	RØ	A	10066.9
AV47	RØ	A	11351.6
AV47	RØ	A	14526.8
AV47	RØ	A	9519.82
AV47	RØ	A	16616.4
AV47	RØ	A	10923.4
AV47	RØ	A	7311.44
AV47	RØ	A	14131
AV47	RØ	A	13909
AV47	RØ	A	15814.6
AV47	RØ	A	6808.3
AV47	RØ	A	8643.82
AV47	RØ	A	10651.9
AV47	RØ	A	9289.18
AV47	RØ	A	11625.6
AV47	RØ	A	11210.4
AV47	RØ	A	6157.62
AV47	RØ	A	6953.58
AV47	RØ	A	14187.7
AV47	RØ	A	20055.7
AV47	RØ	A	20656.9
AV47	RØ	A	13462.1
AV47	RØ	A	13904
AV47	RØ	A	13821.1
AV47	RØ	A	8922.74
AV47	RØ	A	8556.19
AV47	RØ	A	11122.6
AV47	RØ	A	12210
AV47	RØ	A	13946.5
AV47	RØ	A	6696.1
AV47	RØ	A	34131.3
AV47	RØ	A	31253.3
AV47	RØ	A	13895.2
AV47	RØ	A	14641.1
AV47	RØ	A	7768.1
AV47	RØ	A	7516.9
AV47	RØ	A	5716.07
AV47	RØ	A	13841.2
AV47	RØ	A	12320.6
AV47	RØ	A	7657.88
AV47	RØ	A	12590.7
AV47	RØ	A	6767.15
AV47	RØ	A	8957.69
AV47	RØ	A	9076.58
AV47	RØ	A	6024.43
AV47	RØ	A	7484.98
AV47	RØ	A	9800.75
AV47	RØ	A	12606.3
AV47	RØ	A	11453.9
AV47	RØ	A	23120.1
AV47	RØ	A	10513.2
AV47	RØ	A	12065.4
AV47	RØ	A	8801.48
AV47	RØ	A	11546.2
AV47	RØ	A	7351.24
AV47	RØ	A	18273.5
AV47	RØ	A	16400.1
AV47	RØ	A	10774.9
AV47	RØ	A	8290.17
AV47	RØ	A	11394.7
AV47	RØ	A	13728.1
AV47	RØ	A	6828.99
AV47	RØ	A	14342
AV47	RØ	A	12323.7
AV47	RØ	A	13075.2
AV47	RØ	A	10261.1
AV47	RØ	A	12677.4
AV47	RØ	A	13825.9
AV47	RØ	A	8608.41
AV47	RØ	A	12376.6
AV47	RØ	A	7649.85
AV47	RØ	A	10350.3
AV47	RØ	A	9966.07
AV47	RØ	A	9509.97
AV47	RØ	A	12001.9
AV47	RØ	A	10646.4
AV47	RØ	A	9805
AV47	RØ	A	27205.7
AV47	RØ	A	8593.13
AV47	RØ	A	20509.1
AV47	RØ	A	8224.6
AV47	RØ	A	6481.45
AV47	RØ	A	11602.6
AV47	RØ	A	12672.5
AV47	RØ	A	20632.1
AV47	RØ	A	9623.73
AV47	RØ	A	14071.7
AV47	RØ	A	7141.22
AV47	RØ	A	10849.8
AV47	RØ	A	11812
AV47	RØ	A	8304.36
AV47	RØ	A	22888.8
AV47	RØ	A	9681.27
AV47	RØ	A	11947.6
AV47	RØ	A	16377.3
AV47	RØ	A	12732.6
AV47	RØ	A	8564.14
AV47	RØ	A	13159.9
AV47	RØ	A	7034.05
AV47	RØ	A	10153.9
AV47	RØ	A	13908.8
AV47	RØ	A	11673.8
AV47	RØ	A	13367.7
AV47	RØ	A	11675.9
AV47	RØ	A	9524.62
AV47	RØ	A	7761.74
AV47	RØ	A	9643.07
AV47	RØ	A	10888.3
AV47	RØ	A	13185.9
AV47	RØ	A	13665.4
AV47	RØ	A	8155.83
AV47	RØ	A	9383.72
AV47	RØ	A	7658.64
AV47	RØ	A	16558.6
AV47	RØ	A	12555.9
AV47	RØ	A	11932.2
AV47	RØ	A	8393.88
AV47	RØ	A	8783.71
AV47	RØ	A	6837.14
AV47	RØ	A	10166.3
AV47	RØ	A	6831.04
AV47	RØ	A	6104.19
AV47	RØ	A	9772.71
AV47	RØ	A	18426.2
AV47	RØ	A	11730.8
AV47	RØ	A	17389.1
AV47	RØ	A	9210.5
AV47	RØ	A	29203.1
AV47	RØ	A	8353.73
AV47	RØ	A	6754.44
AV47	RØ	A	8900.58
AV47	RØ	A	7828.97
AV47	RØ	A	11502.5
AV47	RØ	A	17859
AV47	RØ	A	8752.7
AV47	RØ	A	9864.55
AV47	RØ	A	9873.37
AV47	RØ	A	8302.23
AV47	RØ	A	7403.67
AV47	RØ	A	13347.5
AV47	RØ	A	9746.32
AV47	RØ	A	16489.6
AV47	RØ	A	11354.1
AV47	RØ	A	7130.8
AV47	RØ	A	9380.29
AV47	RØ	A	14562.4
AV47	RØ	A	11229.7
AV47	RØ	A	7640.66
AV47	RØ	A	7321.73
AV47	RØ	A	24380.2
AV47	RØ	A	11680.7
AV47	RØ	A	17433.5
AV47	RØ	A	5589.24
AV47	RØ	A	8602.87
AV47	RØ	A	6911.39
AV47	RØ	A	13429.7
AV47	RØ	A	11365.9
AV47	RØ	A	13071.3
AV47	RØ	A	10073.4
AV47	RØ	A	13175.8
AV47	RØ	A	9456.19
AV47	RØ	A	13110.2
AV47	RØ	A	13048.2
AV47	RØ	A	14851.4
AV47	RØ	A	10201
AV47	RØ	A	11189.7
AV47	RØ	A	8145.41
AV47	RØ	A	10321.4
AV47	RØ	A	8611.16
AV47	RØ	A	7757.07
AV47	RØ	A	13433.1
AV47	RØ	A	33421.3
AV47	RØ	A	8735.96
AV47	RØ	A	10786.2
AV47	RØ	A	12397.1
AV47	RØ	A	6383.64
AV47	RØ	A	7892.42
AV47	RØ	A	11715
AV47	RØ	A	13542.1
AV47	RØ	A	8325.23
AV47	RØ	A	6421.77
AV47	RØ	A	10989.2
AV47	RØ	A	6809.99
AV47	RØ	A	6450.37
AV47	RØ	A	18598
AV47	RØ	A	11612
AV47	RØ	A	13393.4
AV47	RØ	A	9758.54
AV47	RØ	A	14325
AV47	RØ	A	7013.86
AV47	RØ	A	7723.3
AV47	RØ	A	6532.96
AV47	RØ	A	16292.3
AV47	RØ	A	10700.9
AV47	RØ	A	9182.08
AV47	RØ	A	8726.91
AV47	R18	A	721.342
AV47	R18	A	1888.83
AV47	R18	A	554.192
AV47	R18	A	308.636
AV47	R18	A	463.895
AV47	R18	A	588.808
AV47	R18	A	414.636
AV47	R18	A	381.369
AV47	R18	A	737.691
AV47	R18	A	613.778
AV47	R18	A	332.055
AV47	R18	A	485.155
AV47	R18	A	393.465
AV47	R18	A	216.379
AV47	R18	A	380.542
AV47	R18	A	702.26
AV47	R18	A	185.646
AV47	R18	A	508.871
AV47	R18	A	1186.39
AV47	R18	A	1562.28
AV47	R18	A	423.862
AV47	R18	A	399.374
AV47	R18	A	248.647
AV47	R18	A	194.114
AV47	R18	A	296.34
AV47	R18	A	468.731
AV47	R18	A	818.223
AV47	R18	A	543.882
AV47	R18	A	390.445
AV47	R18	A	202.024
AV47	R18	A	754.161
AV47	R18	A	258.425
AV47	R18	A	1152.45
AV47	R18	A	283.616
AV47	R18	A	313.614
AV47	R18	A	289.295
AV47	R18	A	1185.31
AV47	R18	A	393.308
AV47	R18	A	398.517
AV47	R18	A	285.297
AV47	R18	A	372.077
AV47	R18	A	470.164
AV47	R18	A	307.041
AV47	R18	A	344.052
AV47	R18	A	392.468
AV47	R18	A	451.641
AV47	R18	A	398.611
AV47	R18	A	446.568
AV47	R18	A	722.123
AV47	R18	A	274.636
AV47	R18	A	573.426
AV47	R18	A	355.802
AV47	R18	A	567.637
AV47	R18	A	980.512
AV47	R18	A	455.709
AV47	R18	A	413.845
AV47	R18	A	608.642
AV47	R18	A	453.165
AV47	R18	A	419.457
AV47	R18	A	187.182
AV47	R18	A	531.972
AV47	R18	A	409.886
AV47	R18	A	328.688
AV47	R18	A	1689.31
AV47	R18	A	707.354
AV47	R18	A	475.341
AV47	R18	A	284.477
AV47	R18	A	176.691
AV47	R18	A	704.518
AV47	R18	A	366.665
AV47	R18	A	591.118
AV47	R18	A	255.893
AV47	R18	A	303.021
AV47	R18	A	441.854
AV47	R18	A	256.019
AV47	R18	A	1140.74
AV47	R18	A	169.868
AV47	R18	A	2447.25
AV47	R18	A	1864.19
AV47	R18	A	365.966
AV47	R18	A	2079.01
AV47	R18	A	292.912
AV47	R18	A	386.967
AV47	R18	A	391.679
AV47	R18	A	713.802
AV47	R18	A	669.517
AV47	R18	A	460.594
AV47	R18	A	190.051
AV47	R18	A	1389.46
AV47	R18	A	556.557
AV47	R18	A	381.048
AV47	R18	A	517.677
AV47	R18	A	319.24
AV47	R18	A	337.576
AV47	R18	A	430.865
AV47	R18	A	526.591
AV47	R18	A	231.436
AV47	R18	A	319.029
AV47	R18	A	453.16
AV47	R18	A	3861.99
AV47	R18	A	377.929
AV47	R18	A	498.873
AV47	R18	A	290.691
AV47	R18	A	499.761
AV47	R18	A	577.392
AV47	R18	A	385.404
AV47	R18	A	690.05
AV47	R18	A	1326.63
AV47	R18	A	313.057
AV47	R18	A	505.089
AV47	R18	A	496.262
AV47	R18	A	1638.87
AV47	R18	A	681.841
AV47	R18	A	347.736
AV47	R18	A	918.769
AV47	R18	A	450.255
AV47	R18	A	541.941
AV47	R18	A	469.273
AV47	R18	A	416.351
AV47	R18	A	545.75
AV47	R18	A	197.997
AV47	R18	A	406.044
AV47	R18	A	430.333
AV47	R18	A	501.046
AV47	R18	A	247.509
AV47	R18	A	465.935
AV47	R18	A	404.356
AV47	R18	A	685.707
AV47	R18	A	594.02
AV47	R18	A	288.604
AV47	R18	A	394.975
AV47	R18	A	433.75
AV47	R18	A	270.974
AV47	R18	A	579.101
AV47	R18	A	245.729
AV47	R18	A	574.271
AV47	R18	A	337.492
AV47	R18	A	290.576
AV47	R18	A	423.547
AV47	R18	A	465.385
AV47	R18	A	490.154
AV47	R18	A	242.01
AV47	R18	A	1894.85
AV47	R18	A	259.554
AV47	R18	A	252.653
AV47	R18	A	910.711
AV47	R18	A	529.059
AV47	R18	A	334.787
AV47	R18	A	376.567
AV47	R18	A	691.708
AV47	R18	A	650.234
AV47	R18	A	495.402
AV47	R18	A	477.407
AV47	R18	A	1661.83
AV47	R18	A	256.897
AV47	R18	A	447.24
AV47	R18	A	3052.69
AV47	R18	A	208.271
AV47	R18	A	372.354
AV47	R18	A	357.922
AV47	R18	A	337.948
AV47	R18	A	401.053
AV47	R18	A	401.346
AV47	R18	A	1219.92
AV47	R18	A	282.616
AV47	R18	A	805.878
AV47	R18	A	318.589
AV47	R18	A	862.889
AV47	R18	A	433.337
AV47	R18	A	657.015
AV47	R18	A	425.767
AV47	R18	A	324.329
AV47	R18	A	562.172
AV47	R18	A	477.661
AV47	R18	A	1616.49
AV47	R18	A	265.977
AV47	R18	A	374.108
AV47	R18	A	415.832
AV47	R18	A	247.271
AV47	R18	A	451.826
AV47	R18	A	586.978
AV47	R18	A	409.927
AV47	R18	A	396.426
AV47	R18	A	550.979
AV47	R18	A	506.668
AV47	R18	A	416.091
AV47	R18	A	270.543
AV47	R18	A	385.822
AV47	R18	A	342.411
AV47	R18	A	275.711
AV47	R18	A	413.625
AV47	R18	A	527.879
AV47	R18	A	752.275
AV47	R18	A	238.768
AV47	R18	A	980.88
AV47	R18	A	393.743
AV47	R18	A	290.534
AV47	R18	A	358.958
AV47	R18	A	1089.56
AV47	R18	A	1568.7
AV47	R18	A	290.127
AV47	R18	A	441.932
AV47	R18	A	829.821
AV47	R18	A	375.917
AV47	R18	A	358.749
AV47	R18	A	335.643
AV47	R18	A	734.78
AV47	R18	A	738.119
AV47	R18	A	217.761
AV47	R18	A	436.67
AV47	R18	A	330.022
AV47	R18	A	336.043
AV47	R18	A	422.891
AV47	R18	A	547.099
AV47	R18	A	404.986
AV47	R18	A	441.207
AV47	R18	A	1606.64
AV47	R18	A	330.892
AV47	R18	A	2782.44
AV47	R18	A	469.853
AV47	R18	A	490.529
AV47	R18	A	702.004
AV47	R18	A	457.101
AV47	R18	A	401.883
AV47	R18	A	4089.92
AV47	R18	A	600.229
AV47	R18	A	529.447
AV47	R18	A	232.341
AV47	R18	A	744.634
AV47	R18	A	368.989
AV47	R18	A	2351.49
AV47	R18	A	541.696
AV47	R18	A	2054.61
AV47	R18	A	480.214
AV47	R18	A	607.636
AV47	R18	A	400.227
AV47	R18	A	646.607
AV47	R18	A	412.921
AV47	R18	A	442.467
AV47	R18	A	430.534
AV47	R18	A	319.823
AV47	R18	A	238.638
AV47	R18	A	344.289
AV47	R18	A	339.255
AV47	R18	A	714.983
AV47	R18	A	3606.7
AV47	R18	A	855.309
AV47	R18	A	215.511
AV47	R18	A	356.977
AV47	R18	A	507.911
AV47	R18	A	335.867
AV47	R18	A	317.305
AV47	R18	A	939.772
AV47	R18	A	500.41
AV47	R18	A	385.42
AV47	R18	A	1085.75
AV47	R18	A	425.558
AV47	R18	A	409.74
AV47	R18	A	360.602
AV47	R18	A	241.094
AV47	R18	A	234.305
AV47	R18	A	1807.44
AV47	R18	A	311.738
AV47	R18	A	439.171
AV47	R18	A	544.177
AV47	R18	A	210.201
AV47	R18	A	388.42
AV47	R18	A	360.255
AV47	R18	A	429.88
AV47	R18	A	594.601
AV47	R18	A	655.387
AV47	R18	A	199.617
AV47	R18	A	255.775
AV47	R18	A	247.496
AV47	R18	A	423.1
AV47	R18	A	374.826
AV47	R18	A	333.908
AV47	R18	A	2192.83
AV47	R18	A	192.203
AV47	R18	A	554.975
AV47	R18	A	319.762
AV47	R18	A	788.922
AV47	R18	A	1858.31
AV47	R18	A	301.802
AV47	R18	A	1345.73
AV47	R18	A	546.218
AV47	R18	A	369.088
AV47	R18	A	372.986
AV47	R18	A	365.484
AV47	R18	A	226.097
AV47	R18	A	310.338
AV47	R18	A	606.539
AV47	R18	A	537.236
AV47	R18	A	1621.53
AV47	R18	A	436.071
AV47	R18	A	479.822
AV47	R18	A	417.711
AV47	R18	A	435.215
AV47	R18	A	268.318
AV47	R18	A	1073.12
AV47	R18	A	429.062
AV47	R18	A	521.608
AV47	R18	A	2585.28
AV47	R18	A	302.169
AV47	R18	A	789.123
AV47	R18	A	753.03
AV47	R18	A	402.308
AV47	R18	A	526.693
AV47	R18	A	460.655
AV47	R18	A	242.752
AV47	R18	A	382.801
AV47	R18	A	700.173
AV47	R18	A	1163.73
AV47	R18	A	344.666
AV47	R18	A	540.845
AV47	R18	A	386.828
AV47	R18	A	324.52
AV47	R18	A	287.875
AV47	R18	A	727.705
AV47	R18	A	345
AV47	R18	A	812.614
AV47	R18	A	1056.76
AV47	R18	A	628.882
AV47	R18	A	368.816
AV47	R18	A	740.99
AV47	R18	A	427.064
AV47	R18	A	456.308
AV47	R18	A	358.099
AV47	R18	A	418.727
AV47	R18	A	255.14
AV47	R18	A	343.726
AV47	R18	A	628.182
AV47	R18	A	2233.26
AV47	R18	A	241.569
AV47	R18	A	371.113
AV47	R18	A	429.331
AV47	R18	A	523.585
AV47	R18	A	483.659
AV47	R18	A	710.048
AV47	R18	A	207.936
AV47	R18	A	609.493
AV47	R18	A	127.095
AV47	R18	A	961.55
AV47	R18	A	403.692
AV47	R18	A	617.112
AV47	R18	A	475.417
AV47	R18	A	290.011
AV47	R18	A	589.508
AV47	R18	A	343.521
AV47	R18	A	653.37
AV47	R18	A	540.901
AV47	R18	A	987.911
AV47	R18	A	408.436
AV47	R18	A	470.051
AV47	R18	A	320.357
AV47	R18	A	522.225
AV47	R18	A	456.922
AV47	R18	A	605.842
AV47	R18	A	467.048
AV47	R18	A	1545.84
AV47	R18	A	186.066
AV47	R18	A	388.633
AV47	R18	A	340.046
AV47	R18	A	550.303
AV47	R18	A	762.675
AV47	R18	A	384.499
AV47	R18	A	474.704
AV47	R18	A	206.191
AV47	R18	A	247.923
AV47	R18	A	445.237
AV47	R18	A	522.041
AV47	R18	A	429.907
AV47	R18	A	568.892
AV47	R18	A	296.124
AV47	R18	A	361.374
AV47	R18	A	375.172
AV47	R18	A	448.17
AV47	R18	A	300.988
AV47	R18	A	610.054
AV47	R18	A	350.9
AV47	R18	A	306.338
AV47	R18	A	389.751
AV47	R18	A	609.606
AV47	R18	A	294.636
AV47	R18	A	1133.7
AV47	R18	A	623.116
AV47	R18	A	307.646
AV47	R18	A	523.003
AV47	R18	A	518.895
AV47	R18	A	256.02
AV47	R18	A	437.547
AV47	R18	A	1133.95
AV47	R18	A	305.291
AV47	R18	A	664.951
AV47	R18	A	313.63
AV47	R18	A	344.205
AV47	R18	A	334.473
AV47	R18	A	460.716
AV47	R18	A	214.372
AV47	R18	A	586.243
AV47	R18	A	426.186
AV47	R18	A	790.141
AV47	R18	A	514.88
AV47	R18	A	414.532
AV47	R18	A	1451.27
AV47	R18	A	546.077
AV47	R18	A	402.008
AV47	R18	A	354.517
AV47	R18	A	273.911
AV47	R18	A	1853.32
AV47	R18	A	161.573
AV47	R18	A	234.919
AV47	R18	A	604.13
AV47	R18	A	1400.07
AV47	R18	A	537.636
AV47	R18	A	392.671
AV47	R18	A	400.069
AV47	R18	A	477.311
AV47	R18	A	372.4
AV47	R18	A	599.444
AV47	R18	A	1398.46
AV47	R18	A	266.012
AV47	R18	A	421.631
AV47	R18	A	1876.43
AV47	R18	A	553.003
AV47	R18	A	556.259
AV47	R18	A	3309.53
AV47	R18	A	2051.65
AV47	R18	A	1748.62
AV47	R18	A	484.193
AV47	R18	A	574.297
AV47	R18	A	454.46
AV47	R18	A	248.538
AV47	R18	A	1363.87
AV47	R18	A	464.303
AV47	R18	A	396.915
AV47	R18	A	234.547
AV47	R18	A	371.211
AV47	R18	A	375.126
AV47	R18	A	329.808
AV47	R18	A	1073.66
AV47	R18	A	373.429
AV47	R18	A	1491.31
AV47	R18	A	364.602
AV47	R18	A	802.951
AV47	R18	A	2592.6
AV47	R18	A	1548.89
AV47	R18	A	542.785
AV47	R18	A	231.097
AV47	R18	A	252.463
AV47	R18	A	590.484
AV47	R18	A	895.194
AV47	R18	A	666.217
AV47	R18	A	566.738
AV47	R18	A	280.392
AV47	R18	A	974.993
AV47	R18	A	1292.16
AV47	R18	A	214.964
AV47	R18	A	1221.09
AV47	R18	A	812.154
AV47	R18	A	1143.36
AV47	R18	A	352.689
AV47	R18	A	1780.5
AV47	R18	A	363.151
AV47	R18	A	2651.09
AV47	R18	A	309.896
AV47	R18	A	241.003
AV47	R18	A	312.261
AV47	R18	A	290.092
AV47	R18	A	280.297
AV47	R18	A	274.503
AV47	R18	A	400.501
AV47	R18	A	510.476
AV47	R18	A	399.547
AV47	R18	A	280.373
AV47	R18	A	193.206
AV47	R18	A	412.43
AV47	R18	A	438.706
AV47	R18	A	302.74
AV47	R18	A	253.356
AV47	R18	A	4074.68
AV47	R18	A	292.171
AV47	R18	A	389.15
AV47	R18	A	487.874
AV47	R18	A	431.945
AV47	R18	A	344.365
AV47	R18	A	434.341
AV47	R18	A	503.69
AV47	R18	A	2174.24
AV47	R18	A	277.451
AV47	R18	A	599.446
AV47	R18	A	1330.67
AV47	R18	A	519.479
AV47	R18	A	750.268
AV47	R18	A	405.25
AV47	R18	A	434.31
AV47	R18	A	438.198
AV47	R18	A	527.269
AV47	R18	A	360.673
AV47	R18	A	583.852
AV47	R18	A	279.956
AV47	R18	A	779.035
AV47	R18	A	1111.37
AV47	R18	A	338.977
AV47	R18	A	252.797
AV47	R18	A	531.711
AV47	R18	A	258.493
AV47	R18	A	351.871
AV47	R18	A	966.987
AV47	R18	A	662.189
AV47	R18	A	1018.11
AV47	R18	A	1209.43
AV47	R18	A	554.537
AV47	R18	A	186.818
AV47	R18	A	489.425
AV47	R18	A	412.283
AV47	R18	A	273.328
AV47	R18	A	192.256
AV47	R18	A	1505.59
AV47	R18	A	404.257
AV47	R18	A	878.682
AV47	R18	A	201.492
AV47	R18	A	456.771
AV47	R18	A	216.056
AV47	R18	A	843.854
AV47	R18	A	1394.15
AV47	R18	A	383.148
AV47	R18	A	581.488
AV47	R18	A	581.508
AV47	R18	A	439.363
AV47	R18	A	441.229
AV47	R18	A	360.508
AV47	R18	A	456.526
AV47	R18	A	351.224
AV47	R18	A	563.681
AV47	R18	A	319.073
AV47	R18	A	369.993
AV47	R18	A	205.356
AV47	R18	A	532.119
AV47	R18	A	679.081
AV47	R18	A	376.351
AV47	R18	A	524.983
AV47	R18	A	470.959
AV47	R18	A	356.055
AV47	R18	A	714.337
AV47	R18	A	492.743
AV47	R18	A	595.273
AV47	R18	A	2937.55
AV47	R18	A	473.245
AV47	R18	A	602.15
AV47	R18	A	294.964
AV47	R18	A	375.058
AV47	R18	A	227.286
AV47	R18	A	633.936
AV47	R18	A	463.434
AV47	R18	A	758.406
AV47	R18	A	317.882
AV47	R18	A	511.74
AV47	R18	A	334.725
AV47	R18	A	298.762
AV47	R18	A	299.17
AV47	R18	A	463.756
AV47	R18	A	280.457
AV47	R18	A	504.321
AV47	R18	A	281.333
AV47	R18	A	406.765
AV47	R18	A	418.791
AV47	R18	A	303.15
AV47	R18	A	397.063
AV47	R18	A	312
AV47	R18	A	282.134
AV47	R18	A	655.698
AV47	R18	A	228.391
AV47	R18	A	549.192
AV47	R18	A	579.819
AV47	R18	A	998.563
AV47	R18	A	303.056
AV47	R18	A	484.465
AV47	R18	A	299.408
AV47	R18	A	809.042
AV47	R18	A	1547.41
AV47	R18	A	342.838
AV47	R18	A	448.633
AV47	R18	A	453.944
AV47	R18	A	532.589
AV47	R18	A	303.649
AV47	R18	A	236.26
AV47	R18	A	491.462
AV47	R18	A	202.559
AV47	R18	A	313.594
AV47	R18	A	491.662
AV47	R18	A	551.929
AV47	R18	A	1107.93
AV47	R18	A	2459.09
AV47	R18	A	566.63
AV47	R18	A	356.05
AV47	R18	A	370.92
AV47	R18	A	364.424
AV47	R18	A	403.412
AV47	R18	A	619.716
AV47	R18	A	455.598
AV47	R18	A	922.333
AV47	R18	A	270.613
AV47	R18	A	526.85
AV47	R18	A	464.728
AV47	R18	A	298.065
AV47	R18	A	667.101
AV47	R18	A	935.311
AV47	R18	A	644.526
AV47	R18	A	389.449
AV47	R18	A	445.91
AV47	R18	A	297.456
AV47	R18	A	290.612
AV47	R18	A	982.432
AV47	R18	A	319.121
AV47	R18	A	303.407
AV47	R18	A	266.602
AV47	R18	A	401.316
AV47	R18	A	302.477
AV47	R18	A	337.732
AV47	R18	A	521.118
AV47	R18	A	795.472
AV47	R18	A	651.627
AV47	R18	A	845.971
AV47	R18	A	226.775
AV47	R18	A	488.956
AV47	R18	A	379.727
AV47	R18	A	512.402
AV47	R18	A	2451.2
AV47	R18	A	371.325
AV47	R18	A	507.451
AV47	R18	A	340.45
AV47	R18	A	400.839
AV47	R18	A	773.26
AV47	R18	A	401.238
AV47	R18	A	1236.15
AV47	R18	A	1192.62
AV47	R18	A	416.339
AV47	R18	A	386.764
AV47	R18	A	567.896
AV47	R18	A	544.129
AV47	R18	A	444.822
AV47	R18	A	978.426
AV47	R18	A	495.571
AV47	R18	A	2102.04
AV47	R18	A	640.789
AV47	R18	A	399.291
AV47	R18	A	354.344
AV47	R18	A	706.781
AV47	R18	A	415.304
AV47	R18	A	255.803
AV47	R18	A	714.983
AV47	R18	A	3581.95
AV47	R18	A	352.558
AV47	R18	A	1993.18
AV47	R18	A	301.846
AV47	R18	A	3015.91
AV47	R18	A	1840.77
AV47	R18	A	355.944
AV47	R18	A	1770.16
AV47	R18	A	371.206
AV47	R18	A	332.971
AV47	R18	A	360.905
AV47	R18	A	329.832
AV47	R18	A	306.271
AV47	R18	A	362.245
AV47	R18	A	362.775
AV47	R18	A	396.1
AV47	R18	A	1304.93
AV47	R18	A	580.857
AV47	R18	A	485.039
AV47	R18	A	266.835
AV47	R18	A	661.287
AV47	R18	A	541.14
AV47	R18	A	323.328
AV47	R18	A	430.667
AV47	R18	A	683.361
AV47	R18	A	728.107
AV47	R18	A	1058.97
AV47	R18	A	499.586
AV47	R18	A	675.429
AV47	R18	A	360.43
AV47	R18	A	324.423
AV47	R18	A	355.462
AV47	R18	A	604.594
AV47	R18	A	537.616
AV47	R18	A	472.521
AV47	R18	A	810.48
AV47	R18	A	343.047
AV47	R18	A	435.182
AV47	R18	A	262.86
AV47	R18	A	486.378
AV47	R18	A	728.309
AV47	R18	A	340.002
AV47	R18	A	738.57
AV47	R18	A	2372.01
AV47	R18	A	1571.38
AV47	R18	A	364.35
AV47	R18	A	466.444
AV47	R18	A	306.192
AV47	R18	A	296.282
AV47	R18	A	435.71
AV47	R18	A	1299.08
AV47	R18	A	481.983
AV47	R18	A	491.616
AV47	R18	A	2009.29
AV47	R18	A	3424.17
AV47	R18	A	372.723
AV47	R18	A	398.617
AV47	R18	A	290.478
AV47	R18	A	597.856
AV47	R18	A	648.636
AV47	R18	A	267.253
AV47	R18	A	588.215
AV47	R18	A	622.375
AV47	R18	A	484.931
AV47	R18	A	652.075
AV47	R18	A	627.823
AV47	R18	A	199.892
AV47	R18	A	1305
AV47	R18	A	382.109
AV47	R18	A	700.386
AV47	R18	A	333.914
AV47	R18	A	240.293
AV47	R18	A	669.259
AV47	R18	A	338.141
AV47	R18	A	404.551
AV47	R18	A	3836.55
AV47	R18	A	466.131
AV47	R18	A	459.748
AV47	R18	A	241.744
AV47	R18	A	366.091
AV47	R18	A	206.888
AV47	R18	A	586.674
AV47	R18	A	410.827
AV47	R18	A	505.545
AV47	R18	A	1581.79
AV47	R18	A	186.444
AV47	R18	A	1045.83
AV47	R18	A	435.817
AV47	R18	A	343.058
AV47	R18	A	551.84
AV47	R18	A	440.544
AV47	R18	A	414.156
AV47	R18	A	543.902
AV47	R18	A	612.873
AV47	R18	A	341.559
AV47	R18	A	486.318
AV47	R18	A	315.115
AV47	R18	A	528.781
AV47	R18	A	1605.21
AV47	R18	A	294.3
AV47	R18	A	400.684
AV47	R18	A	400.063
AV47	R18	A	237.683
AV47	R18	A	483.334
AV47	R18	A	594.981
AV47	R18	A	255.688
AV47	R18	A	562.028
AV47	R18	A	2672.72
AV47	R18	A	435.992
AV47	R18	A	576.573
AV47	R18	A	949.547
AV47	R18	A	356.886
AV47	R18	A	374.513
AV47	R18	A	554.595
AV47	R18	A	380.847
AV47	R18	A	529.451
AV47	R18	A	333.138
AV47	R18	A	1068.92
AV47	R18	A	277.864
AV47	R18	A	1171.46
AV47	R18	A	609.431
AV47	R18	A	474.803
AV47	R18	A	399.357
AV47	R18	A	333.427
AV47	R18	A	388.667
AV47	R18	A	325.195
AV47	R18	A	506.586
AV47	R18	A	588.128
AV47	R18	A	359.139
AV47	R18	A	1306.05
AV47	R18	A	212.062
AV47	R18	A	743.716
AV47	R18	A	1155.29
AV47	R18	A	1959.72
AV47	R18	A	253.112
AV47	R18	A	425.181
AV47	R18	A	321.348
AV47	R18	A	576.893
AV47	R18	A	854.58
AV47	R18	A	1804.98
AV47	R18	A	254.872
AV47	R18	A	570.12
AV47	R18	A	555.823
AV47	R18	A	1486.15
AV47	R18	A	419.118
AV47	R18	A	277.943
AV47	R18	A	207.603
AV47	R18	A	516.953
AV47	R18	A	643.802
AV47	R18	A	261.839
AV47	R18	A	213.555
AV47	R18	A	282.562
AV47	R18	A	944.035
AV47	R18	A	939.84
AV47	R18	A	520.692
AV47	R18	A	509.4
AV47	R18	A	288.604
AV47	R18	A	393.97
AV47	R18	A	1380.08
AV47	R18	A	520.626
AV47	R18	A	646.946
AV47	R18	A	539.358
AV47	R18	A	237.12
AV47	R18	A	694.661
AV47	R18	A	621.437
AV47	R18	A	289.196
AV47	R18	A	353.596
AV47	R18	A	2696.06
AV47	R18	A	648.769
AV47	R18	A	521.043
AV47	R18	A	233.388
AV47	R18	A	424.832
AV47	R18	A	1154.13
AV47	R18	A	347.949
AV47	R18	A	451.31
AV47	R18	A	320.768
AV47	R18	A	430.407
AV47	R18	A	727.895
AV47	R18	A	325.668
AV47	R18	A	484.524
AV47	R18	A	502.188
AV47	R18	A	820.661
AV47	R18	A	619.459
AV47	R18	A	938.312
AV47	R18	A	283.414
AV47	R18	A	319.665
AV47	R18	A	474.948
AV47	R18	A	168.677
AV47	R18	A	445.04
AV47	R18	A	161.684
AV47	R18	A	549.603
AV47	R18	A	419.795
AV47	R18	A	247.962
AV47	R18	A	1471.54
AV47	R18	A	252.513
AV47	R18	A	2689.59
AV47	R18	A	640.122
AV47	R18	A	498.633
AV47	R18	A	483.939
AV47	R18	A	321.119
AV47	R18	A	627.954
AV47	R18	A	702.801
AV47	R18	A	3051.48
AV47	R18	A	1015.82
AV47	R18	A	992.963
AV47	R18	A	636.293
AV47	R18	A	544.776
AV47	R18	A	403.006
AV47	R18	A	680.538
AV47	R18	A	518.23
AV47	R18	A	2844.01
AV47	R18	A	399.73
AV47	R18	A	851.927
AV47	R18	A	498.217
AV47	R18	A	450.616
AV47	R18	A	669.356
AV47	R18	A	486.341
AV47	R18	A	604.667
AV47	R18	A	4108.26
AV47	R18	A	358.321
AV47	R18	A	490.978
AV47	R18	A	1226.35
AV47	R18	A	548.005
AV47	R18	A	463.481
AV47	R18	A	536.292
AV47	R18	A	655.98
AV47	R18	A	375.316
AV47	R18	A	556.397
AV47	R18	A	1137.98
AV47	R18	A	860.326
AV47	R18	A	3675.26
AV47	R18	A	2044.29
AV47	R18	A	540.949
AV47	R18	A	596.606
AV47	R18	A	670.28
AV47	R18	A	1711.09
AV47	R18	A	617.671
AV47	R18	A	296.079
AV47	R18	A	256.902
AV47	R18	A	486.24
AV47	R18	A	1520.07
AV47	R18	A	370.844
AV47	R18	A	849.354
AV47	R18	A	526.997
AV47	R18	A	624.456
AV47	R18	A	411.13
AV47	R18	A	412.753
AV47	R18	A	177.237
AV47	R18	A	449.287
AV47	R18	A	337.618
AV47	R18	A	500.107
AV47	R18	A	1045.21
AV47	R18	A	1062.3
AV47	R18	A	561.896
AV47	R18	A	749.892
AV47	R18	A	963.912
AV47	R18	A	1591.59
AV47	R18	A	402.29
AV47	R18	A	1074.54
AV47	R18	A	619.515
AV47	R18	A	4262.63
AV47	R18	A	412.622
AV47	R18	A	305.161
AV47	R18	A	1303.08
AV47	R18	A	546.863
AV47	R18	A	839.469
AV47	R18	A	3291.04
AV47	R18	A	343.614
AV47	R18	A	536.966
AV47	R18	A	604.028
AV47	R18	A	794.763
AV47	R18	A	464.202
AV47	R18	A	1915.76
AV47	R18	A	262.13
AV47	R18	A	483.474
AV47	R18	A	277.462
AV47	R18	A	3602.9
AV47	R18	A	526.18
AV47	R18	A	621.887
AV47	R18	A	477.854
AV47	R18	A	693.531
AV47	R18	A	298.374
AV47	R18	A	1022.22
AV47	R18	A	217.663
AV47	R18	A	558.757
AV47	R18	A	492.993
AV47	R18	A	374.102
AV47	R18	A	1089.45
AV47	R18	A	374.952
AV47	R18	A	627.917
AV47	R18	A	314.571
AV47	R18	A	350.45
AV47	R18	A	516.677
AV47	R18	A	599.891
AV47	R18	A	718.663
AV47	R18	A	909.143
AV47	R18	A	1326.55
AV47	R18	A	459.835
AV47	R18	A	219.841
AV47	R18	A	618.199
AV47	R18	A	273.707
AV47	R18	A	331.108
AV47	R18	A	370.403
AV47	R18	A	544.291
AV47	R18	A	465.174
AV47	R18	A	492.006
AV47	R18	A	442.797
AV47	R18	A	718.842
AV47	R18	A	337.056
AV47	R18	A	287.552
AV47	R18	A	293.996
AV47	R18	A	786.875
AV47	R18	A	2871.02
AV47	R18	A	184.993
AV47	R18	A	754.658
AV47	R18	A	482.9
AV47	R18	A	490.008
AV47	R18	A	261.505
AV47	R18	A	491.89
AV47	R18	A	1305.6
AV47	R18	A	2610.64
AV47	R18	A	1179.95
AV47	R18	A	251.749
AV47	R18	A	435.232
AV47	R18	A	403.01
AV47	R18	A	236.119
AV47	R18	A	352.063
AV47	R18	A	428.47
AV47	R18	A	366.876
AV47	R18	A	296.846
AV47	R18	A	572.213
AV47	R18	A	284.471
AV47	R18	A	298.842
AV47	R18	A	350.197
AV47	R18	A	189.749
AV47	R18	A	247.909
AV47	R18	A	641.912
AV47	R18	A	615.746
AV47	R18	A	621.667
AV47	R18	A	565.658
AV47	R18	A	578.839
AV47	R18	A	474.817
AV47	R18	A	399.093
AV47	R18	A	1607.78
AV47	R18	A	1601.05
AV47	R18	A	940.595
AV47	R18	A	1179.78
AV47	R18	A	294.445
AV47	R18	A	423.424
AV47	R18	A	451.215
AV47	R18	A	610.396
AV47	R18	A	518.658
AV47	R18	A	368.754
AV47	R18	A	1915.66
AV47	R18	A	595.653
AV47	R18	A	835.447
AV47	R18	A	319.31
AV47	R18	A	505.068
AV47	R18	A	2422.29
AV47	R18	A	456.325
AV47	R18	A	680.072
AV47	R18	A	531.873
AV47	R18	A	600.536
AV47	R18	A	339.085
AV47	R18	A	455.865
AV47	R18	A	169.318
AV47	R18	A	366.03
AV47	R18	A	2119.27
AV47	R18	A	579.666
AV47	R18	A	356.484
AV47	R18	A	226.032
AV47	R18	A	437.424
AV47	R18	A	1072.1
AV47	R18	A	426.798
AV47	R18	A	390.194
AV47	R18	A	2088.2
AV47	R18	A	236.445
AV47	R18	A	771.633
AV47	R18	A	522.04
AV47	R18	A	403.228
AV47	R18	A	443.576
[truncated: 23,499 more rows]

## Sheet: Fig1S4_PBP1b
Strain	Guide	Replicate	GFP fluorescence
AV47	GØ	A	773.11
AV47	GØ	A	551.146
AV47	GØ	A	683.763
AV47	GØ	A	604.92
AV47	GØ	A	902.613
AV47	GØ	A	579.448
AV47	GØ	A	596.407
AV47	GØ	A	587.642
AV47	GØ	A	697.376
AV47	GØ	A	971.587
AV47	GØ	A	657.691
AV47	GØ	A	455.737
AV47	GØ	A	524.604
AV47	GØ	A	709.091
AV47	GØ	A	433.99
AV47	GØ	A	865.095
AV47	GØ	A	505.732
AV47	GØ	A	639.601
AV47	GØ	A	753.492
AV47	GØ	A	459.36
AV47	GØ	A	549.522
AV47	GØ	A	628.237
AV47	GØ	A	495.579
AV47	GØ	A	778.342
AV47	GØ	A	506.521
AV47	GØ	A	593.618
AV47	GØ	A	999.089
AV47	GØ	A	728.172
AV47	GØ	A	506.462
AV47	GØ	A	669.721
AV47	GØ	A	705.094
AV47	GØ	A	782.426
AV47	GØ	A	803.655
AV47	GØ	A	410.347
AV47	GØ	A	792.006
AV47	GØ	A	499.869
AV47	GØ	A	525.308
AV47	GØ	A	780.708
AV47	GØ	A	625.87
AV47	GØ	A	704.411
AV47	GØ	A	1381.3
AV47	GØ	A	723.707
AV47	GØ	A	451.704
AV47	GØ	A	530.417
AV47	GØ	A	532.198
AV47	GØ	A	611.469
AV47	GØ	A	521.661
AV47	GØ	A	1023.49
AV47	GØ	A	522.272
AV47	GØ	A	530.535
AV47	GØ	A	619.864
AV47	GØ	A	526.127
AV47	GØ	A	1107.71
AV47	GØ	A	490.996
AV47	GØ	A	490.477
AV47	GØ	A	522.042
AV47	GØ	A	502.401
AV47	GØ	A	374.757
AV47	GØ	A	643.154
AV47	GØ	A	774.193
AV47	GØ	A	535.763
AV47	GØ	A	372.766
AV47	GØ	A	283.912
AV47	GØ	A	579.649
AV47	GØ	A	382.667
AV47	GØ	A	1247.89
AV47	GØ	A	670.337
AV47	GØ	A	829.962
AV47	GØ	A	781.045
AV47	GØ	A	638.868
AV47	GØ	A	791.993
AV47	GØ	A	883.486
AV47	GØ	A	389.43
AV47	GØ	A	1272.31
AV47	GØ	A	604.868
AV47	GØ	A	590.889
AV47	GØ	A	634.676
AV47	GØ	A	438.22
AV47	GØ	A	1029.2
AV47	GØ	A	918.412
AV47	GØ	A	476.165
AV47	GØ	A	727.89
AV47	GØ	A	852.618
AV47	GØ	A	474.761
AV47	GØ	A	594.129
AV47	GØ	A	450.678
AV47	GØ	A	745.409
AV47	GØ	A	641.573
AV47	GØ	A	396.495
AV47	GØ	A	699.169
AV47	GØ	A	491.545
AV47	GØ	A	575.944
AV47	GØ	A	653.83
AV47	GØ	A	720.764
AV47	GØ	A	394.63
AV47	GØ	A	851.846
AV47	GØ	A	494.982
AV47	GØ	A	508.567
AV47	GØ	A	1244.12
AV47	GØ	A	644.268
AV47	GØ	A	626.566
AV47	GØ	A	530.436
AV47	GØ	A	781.929
AV47	GØ	A	736.139
AV47	GØ	A	619.599
AV47	GØ	A	779.997
AV47	GØ	A	524.1
AV47	GØ	A	591.586
AV47	GØ	A	415.392
AV47	GØ	A	442.616
AV47	GØ	A	545.373
AV47	GØ	A	727.741
AV47	GØ	A	456.989
AV47	GØ	A	638.036
AV47	GØ	A	910.056
AV47	GØ	A	749.192
AV47	GØ	A	808.268
AV47	GØ	A	515.623
AV47	GØ	A	469.383
AV47	GØ	A	620.552
AV47	GØ	A	574.898
AV47	GØ	A	650.859
AV47	GØ	A	350.701
AV47	GØ	A	653.891
AV47	GØ	A	887.363
AV47	GØ	A	633.876
AV47	GØ	A	403.413
AV47	GØ	A	637.157
AV47	GØ	A	744.102
AV47	GØ	A	613.545
AV47	GØ	A	606.117
AV47	GØ	A	698.403
AV47	GØ	A	754.633
AV47	GØ	A	783.336
AV47	GØ	A	682.515
AV47	GØ	A	652.854
AV47	GØ	A	577.23
AV47	GØ	A	1044.36
AV47	GØ	A	466.258
AV47	GØ	A	481.215
AV47	GØ	A	933.31
AV47	GØ	A	756.752
AV47	GØ	A	1296.56
AV47	GØ	A	1098.15
AV47	GØ	A	714.596
AV47	GØ	A	754.154
AV47	GØ	A	502.306
AV47	GØ	A	835.854
AV47	GØ	A	794.543
AV47	GØ	A	554.645
AV47	GØ	A	629.332
AV47	GØ	A	1087.78
AV47	GØ	A	827.512
AV47	GØ	A	728.311
AV47	GØ	A	873.2
AV47	GØ	A	1342.89
AV47	GØ	A	381.3
AV47	GØ	A	960.612
AV47	GØ	A	637.654
AV47	GØ	A	596.671
AV47	GØ	A	596.577
AV47	GØ	A	504.081
AV47	GØ	A	614.749
AV47	GØ	A	399.195
AV47	GØ	A	1773.86
AV47	GØ	A	607.134
AV47	GØ	A	680.53
AV47	GØ	A	791.112
AV47	GØ	A	422.021
AV47	GØ	A	877.421
AV47	GØ	A	513.408
AV47	GØ	A	520.325
AV47	GØ	A	681.567
AV47	GØ	A	448.58
AV47	GØ	A	743.241
AV47	GØ	A	1774.28
AV47	GØ	A	369.003
AV47	GØ	A	767.879
AV47	GØ	A	445.997
AV47	GØ	A	621.322
AV47	GØ	A	1231.73
AV47	GØ	A	497.932
AV47	GØ	A	788.358
AV47	GØ	A	618.427
AV47	GØ	A	690.692
AV47	GØ	A	388.507
AV47	GØ	A	409.125
AV47	GØ	A	574.2
AV47	GØ	A	725.463
AV47	GØ	A	525.58
AV47	GØ	A	916.1
AV47	GØ	A	348.864
AV47	GØ	A	542.115
AV47	GØ	A	363.178
AV47	GØ	A	369.901
AV47	GØ	A	705.645
AV47	GØ	A	457.709
AV47	GØ	A	577.77
AV47	GØ	A	297.994
AV47	GØ	A	404.212
AV47	GØ	A	361.807
AV47	GØ	A	873.857
AV47	GØ	A	503.981
AV47	GØ	A	1134.54
AV47	GØ	A	494.93
AV47	GØ	A	793.111
AV47	GØ	A	723.478
AV47	GØ	A	690.032
AV47	GØ	A	409.973
AV47	GØ	A	422.038
AV47	GØ	A	377.508
AV47	GØ	A	409.273
AV47	GØ	A	511.412
AV47	GØ	A	1350.5
AV47	GØ	A	489.931
AV47	GØ	A	470.065
AV47	GØ	A	646.424
AV47	GØ	A	536.842
AV47	GØ	A	677.479
AV47	GØ	A	813.499
AV47	GØ	A	404.382
AV47	GØ	A	710.852
AV47	GØ	A	546.724
AV47	GØ	A	845.612
AV47	GØ	A	896.17
AV47	GØ	A	1366.78
AV47	GØ	A	714.556
AV47	GØ	A	814.904
AV47	GØ	A	567.11
AV47	GØ	A	346.46
AV47	GØ	A	811.889
AV47	GØ	A	366.38
AV47	GØ	A	752.187
AV47	GØ	A	512.178
AV47	GØ	A	716.533
AV47	GØ	A	512.023
AV47	GØ	A	511.98
AV47	GØ	A	737.487
AV47	GØ	A	841.425
AV47	GØ	A	501.433
AV47	GØ	A	694.818
AV47	GØ	A	740.332
AV47	GØ	A	440.936
AV47	GØ	A	694.677
AV47	GØ	A	763.134
AV47	GØ	A	399.831
AV47	GØ	A	452.21
AV47	GØ	A	625.176
AV47	GØ	A	470.507
AV47	GØ	A	523.482
AV47	GØ	A	695.779
AV47	GØ	A	756.795
AV47	GØ	A	629.639
AV47	GØ	A	459.084
AV47	GØ	A	860.039
AV47	GØ	A	433.938
AV47	GØ	A	449.138
AV47	GØ	A	504.968
AV47	GØ	A	457.03
AV47	GØ	A	926.06
AV47	GØ	A	1457.85
AV47	GØ	A	349.713
AV47	GØ	A	626.956
AV47	GØ	A	593.324
AV47	GØ	A	813.041
AV47	GØ	A	641.136
AV47	GØ	A	561.788
AV47	GØ	A	512.899
AV47	GØ	A	744.329
AV47	GØ	A	417.936
AV47	GØ	A	564.11
AV47	GØ	A	582.517
AV47	GØ	A	690.332
AV47	GØ	A	734.223
AV47	GØ	A	430.857
AV47	GØ	A	406
AV47	GØ	A	398.035
AV47	GØ	A	556.811
AV47	GØ	A	425.356
AV47	GØ	A	364.125
AV47	GØ	A	410.811
AV47	GØ	A	719.924
AV47	GØ	A	637.857
AV47	GØ	A	416.158
AV47	GØ	A	681.309
AV47	GØ	A	466.408
AV47	GØ	A	820.834
AV47	GØ	A	598.963
AV47	GØ	A	483.12
AV47	GØ	A	397.689
AV47	GØ	A	457.235
AV47	GØ	A	775.748
AV47	GØ	A	426.625
AV47	GØ	A	413.767
AV47	GØ	A	450.378
AV47	GØ	A	1360.47
AV47	GØ	A	463.456
AV47	GØ	A	499.184
AV47	GØ	A	877.036
AV47	GØ	A	1012.2
AV47	GØ	A	579.155
AV47	GØ	A	394.268
AV47	GØ	A	571.217
AV47	GØ	A	862.734
AV47	GØ	A	560.587
AV47	GØ	A	539.84
AV47	GØ	A	670.524
AV47	GØ	A	1563.96
AV47	GØ	A	604.556
AV47	GØ	A	389.069
AV47	GØ	A	404.734
AV47	GØ	A	585.079
AV47	GØ	A	704.261
AV47	GØ	A	549.962
AV47	GØ	A	485.437
AV47	GØ	A	590.727
AV47	GØ	A	703.848
AV47	GØ	A	648.275
AV47	GØ	A	747.958
AV47	GØ	A	781.016
AV47	GØ	A	574.116
AV47	GØ	A	583.72
AV47	GØ	A	737.803
AV47	GØ	A	577.042
AV47	GØ	A	748.828
AV47	GØ	A	752.161
AV47	GØ	A	572.367
AV47	GØ	A	800.627
AV47	GØ	A	601.516
AV47	GØ	A	516.876
AV47	GØ	A	867.647
AV47	GØ	A	619.539
AV47	GØ	A	478.724
AV47	GØ	A	401.279
AV47	GØ	A	489.256
AV47	GØ	A	365.552
AV47	GØ	A	781.172
AV47	GØ	A	800.432
AV47	GØ	A	656.647
AV47	GØ	A	796.35
AV47	GØ	A	554.91
AV47	GØ	A	479.841
AV47	GØ	A	522.405
AV47	GØ	A	746.915
AV47	GØ	A	448.322
AV47	GØ	A	651.338
AV47	GØ	A	725.433
AV47	GØ	A	612.355
AV47	GØ	A	512.718
AV47	GØ	A	543.676
AV47	GØ	A	416.637
AV47	GØ	A	608.734
AV47	GØ	A	381.529
AV47	GØ	A	559.054
AV47	GØ	A	1113.06
AV47	GØ	A	742.083
AV47	GØ	A	675.869
AV47	GØ	A	519.936
AV47	GØ	A	675.273
AV47	GØ	A	501.007
AV47	GØ	A	778.38
AV47	GØ	A	487.498
AV47	GØ	A	746.418
AV47	GØ	A	771.982
AV47	GØ	A	693.758
AV47	GØ	A	558.294
AV47	GØ	A	428.549
AV47	GØ	A	640.641
AV47	GØ	A	818.096
AV47	GØ	A	466.067
AV47	GØ	A	432.807
AV47	GØ	A	515.41
AV47	GØ	A	694.688
AV47	GØ	A	606.826
AV47	GØ	A	458.995
AV47	GØ	A	850.275
AV47	GØ	A	561.729
AV47	GØ	A	430.709
AV47	GØ	A	409.465
AV47	GØ	A	513.164
AV47	GØ	A	601.018
AV47	GØ	A	870.23
AV47	GØ	A	736.575
AV47	GØ	A	686.976
AV47	GØ	A	678.238
AV47	GØ	A	483.018
AV47	GØ	A	574.711
AV47	GØ	A	682.781
AV47	GØ	A	793.241
AV47	GØ	A	574.394
AV47	GØ	A	509.573
AV47	GØ	A	493.649
AV47	GØ	A	941.328
AV47	GØ	A	733.766
AV47	GØ	A	480.739
AV47	GØ	A	836.448
AV47	GØ	A	398.004
AV47	GØ	A	830.34
AV47	GØ	A	639.686
AV47	GØ	A	747.709
AV47	GØ	A	493.373
AV47	GØ	A	589.283
AV47	GØ	A	893.963
AV47	GØ	A	526.718
AV47	GØ	A	735.528
AV47	GØ	A	603.3
AV47	GØ	A	635.042
AV47	GØ	A	590.777
AV47	GØ	A	350.388
AV47	GØ	A	892.348
AV47	GØ	A	366.972
AV47	GØ	A	616.021
AV47	GØ	A	484.698
AV47	GØ	A	687.456
AV47	GØ	A	668.872
AV47	GØ	A	922.36
AV47	GØ	A	502.199
AV47	GØ	A	469.929
AV47	GØ	A	546.709
AV47	GØ	A	741.822
AV47	GØ	A	2159.7
AV47	GØ	A	458.527
AV47	GØ	A	769.633
AV47	GØ	A	559.802
AV47	GØ	A	914.407
AV47	GØ	A	648.81
AV47	GØ	A	495.627
AV47	GØ	A	398.133
AV47	GØ	A	545.718
AV47	GØ	A	794.901
AV47	GØ	A	328.869
AV47	GØ	A	739.278
AV47	GØ	A	479.581
AV47	GØ	A	556.235
AV47	GØ	A	441.492
AV47	GØ	A	396.524
AV47	GØ	A	629.425
AV47	GØ	A	451.07
AV47	GØ	A	405.352
AV47	GØ	A	602.378
AV47	GØ	A	561.364
AV47	GØ	A	568.192
AV47	GØ	A	442.274
AV47	GØ	A	516.648
AV47	GØ	A	774.89
AV47	GØ	A	724.808
AV47	GØ	A	660.84
AV47	GØ	A	556.356
AV47	GØ	A	482.882
AV47	GØ	A	493.908
AV47	GØ	A	544.759
AV47	GØ	A	429.741
AV47	GØ	A	522.799
AV47	GØ	A	708.016
AV47	GØ	A	662.071
AV47	GØ	A	717.118
AV47	GØ	A	705.617
AV47	GØ	A	576.276
AV47	GØ	A	698.058
AV47	GØ	A	493.316
AV47	GØ	A	396.467
AV47	GØ	A	428.012
AV47	GØ	A	551.169
AV47	GØ	A	1055.31
AV47	GØ	A	780.523
AV47	GØ	A	526.17
AV47	GØ	A	735.271
AV47	GØ	A	775.591
AV47	GØ	A	369.024
AV47	GØ	A	794.64
AV47	GØ	A	679.739
AV47	GØ	A	691.85
AV47	GØ	A	534.499
AV47	GØ	A	661.407
AV47	GØ	A	518.649
AV47	GØ	A	544.335
AV47	GØ	A	674.705
AV47	GØ	A	655.215
AV47	GØ	A	545.217
AV47	GØ	A	577.604
AV47	GØ	A	922.763
AV47	GØ	A	735.569
AV47	GØ	A	618.131
AV47	GØ	A	1835.85
AV47	GØ	A	618.113
AV47	GØ	A	453.932
AV47	GØ	A	726.554
AV47	GØ	A	735.516
AV47	GØ	A	660.73
AV47	GØ	A	893.77
AV47	GØ	A	417.847
AV47	GØ	A	615.49
AV47	GØ	A	499.627
AV47	GØ	A	539.974
AV47	GØ	A	546.511
AV47	GØ	A	704.611
AV47	GØ	A	541.363
AV47	GØ	A	702.016
AV47	GØ	A	953.715
AV47	GØ	A	618.103
AV47	GØ	A	1053.89
AV47	GØ	A	758.128
AV47	GØ	A	785.354
AV47	GØ	A	724.914
AV47	GØ	A	561.253
AV47	GØ	A	490.341
AV47	GØ	A	555.462
AV47	GØ	A	707.27
AV47	GØ	A	419.614
AV47	GØ	A	1168.1
AV47	GØ	A	563.227
AV47	GØ	A	531.05
AV47	GØ	A	454.392
AV47	GØ	A	1316.67
AV47	GØ	A	858.935
AV47	GØ	A	640.3
AV47	GØ	A	749.433
AV47	GØ	A	819.753
AV47	GØ	A	622.128
AV47	GØ	A	402.297
AV47	GØ	A	811.889
AV47	GØ	A	428.373
AV47	GØ	A	635.609
AV47	GØ	A	695.057
AV47	GØ	A	579.555
AV47	GØ	A	518.108
AV47	GØ	A	1747.44
AV47	GØ	A	663.219
AV47	GØ	A	578.993
AV47	GØ	A	1597.54
AV47	GØ	A	381.958
AV47	GØ	A	680.516
AV47	GØ	A	668.033
AV47	GØ	A	705.371
AV47	GØ	A	605.381
AV47	GØ	A	631.245
AV47	GØ	A	698.783
AV47	GØ	A	632.028
AV47	GØ	A	416.8
AV47	GØ	A	582.227
AV47	GØ	A	546.075
AV47	GØ	A	1013.85
AV47	GØ	A	560.307
AV47	GØ	A	678.8
AV47	GØ	A	491.31
AV47	GØ	A	425.097
AV47	GØ	A	518.213
AV47	GØ	A	974.144
AV47	GØ	A	793.071
AV47	GØ	A	655.914
AV47	GØ	A	511.024
AV47	GØ	A	607.72
AV47	GØ	A	914.599
AV47	GØ	A	413.641
AV47	GØ	A	658.75
AV47	GØ	A	672.421
AV47	GØ	A	391.172
AV47	GØ	A	479.001
AV47	GØ	A	661.125
AV47	GØ	A	560.436
AV47	GØ	A	1204.88
AV47	GØ	A	356.997
AV47	GØ	A	1894.7
AV47	GØ	A	503.797
AV47	GØ	A	344.76
AV47	GØ	A	345.194
AV47	GØ	A	759.87
AV47	GØ	A	506.378
AV47	GØ	A	530.742
AV47	GØ	A	717.548
AV47	GØ	A	694.553
AV47	GØ	A	2373.81
AV47	GØ	A	521.099
AV47	GØ	A	674.821
AV47	GØ	A	860.446
AV47	GØ	A	675.064
AV47	GØ	A	535.2
AV47	GØ	A	637.997
AV47	GØ	A	1791.41
AV47	GØ	A	713.371
AV47	GØ	A	861.172
AV47	GØ	A	691.871
AV47	GØ	A	859.251
AV47	GØ	A	620.289
AV47	GØ	A	714.836
AV47	GØ	A	709.224
AV47	GØ	A	806.274
AV47	GØ	A	356.523
AV47	GØ	A	933.366
AV47	GØ	A	902.183
AV47	GØ	A	420.834
AV47	GØ	A	605.815
AV47	GØ	A	869.205
AV47	GØ	A	1768.5
AV47	GØ	A	795.901
AV47	GØ	A	410.03
AV47	GØ	A	708.667
AV47	GØ	A	503.031
AV47	GØ	A	973.787
AV47	GØ	A	561.068
AV47	GØ	A	678.266
AV47	GØ	A	1423.75
AV47	GØ	A	630.925
AV47	GØ	A	527.724
AV47	GØ	A	1208.27
AV47	GØ	A	372.82
AV47	GØ	A	622.919
AV47	GØ	A	691.155
AV47	GØ	A	548.881
AV47	GØ	A	308.581
AV47	GØ	A	971.104
AV47	GØ	A	620.962
AV47	GØ	A	562.187
AV47	GØ	A	547.555
AV47	GØ	A	659.044
AV47	GØ	A	1116.85
AV47	GØ	A	583.637
AV47	GØ	A	978.075
AV47	GØ	A	1302.26
AV47	GØ	A	735.487
AV47	GØ	A	680.317
AV47	GØ	A	338.632
AV47	GØ	A	550.05
AV47	GØ	A	707.129
AV47	GØ	A	829.211
AV47	GØ	A	895.926
AV47	GØ	A	730.679
AV47	GØ	A	366.296
AV47	GØ	A	487.066
AV47	GØ	A	696.349
AV47	GØ	A	389.866
AV47	GØ	A	702.994
AV47	GØ	A	543.073
AV47	GØ	A	545.537
AV47	GØ	A	343.843
AV47	GØ	A	347.526
AV47	GØ	A	675.781
AV47	GØ	A	1171.82
AV47	GØ	A	567.189
AV47	GØ	A	519.689
AV47	GØ	A	366.244
AV47	GØ	A	328.129
AV47	GØ	A	397.823
AV47	GØ	A	653.826
AV47	GØ	A	992.527
AV47	GØ	A	659.793
AV47	GØ	A	853.757
AV47	GØ	A	533.858
AV47	GØ	A	484.098
AV47	GØ	A	772.018
AV47	GØ	A	599.176
AV47	GØ	A	544.552
AV47	GØ	A	500.109
AV47	GØ	A	546.984
AV47	GØ	A	693.542
AV47	GØ	A	573.18
AV47	GØ	A	741.248
AV47	GØ	A	536.864
AV47	GØ	A	582.677
AV47	GØ	A	1054.27
AV47	GØ	A	794.196
AV47	GØ	A	877.356
AV47	GØ	A	608.902
AV47	GØ	A	910.034
AV47	GØ	A	605.949
AV47	GØ	A	584.359
AV47	GØ	A	410.054
AV47	GØ	A	686.615
AV47	GØ	A	387.42
AV47	GØ	A	488.783
AV47	GØ	A	606.803
AV47	GØ	A	693.488
AV47	GØ	A	1255.47
AV47	GØ	A	642.313
AV47	GØ	A	479.263
AV47	GØ	A	447.064
AV47	GØ	A	585.715
AV47	GØ	A	600.205
AV47	GØ	A	565.474
AV47	GØ	A	338.032
AV47	GØ	A	534.295
AV47	GØ	A	545.693
AV47	GØ	A	1193.29
AV47	GØ	A	908.82
AV47	GØ	A	377.792
AV47	GØ	A	634.732
AV47	GØ	A	773.112
AV47	GØ	A	685.834
AV47	GØ	A	659.297
AV47	GØ	A	732.09
AV47	GØ	A	540.083
AV47	GØ	A	416.715
AV47	GØ	A	485.947
AV47	GØ	A	656.259
AV47	GØ	A	488.323
AV47	GØ	A	703.373
AV47	GØ	A	650.234
AV47	GØ	A	672.984
AV47	GØ	A	699.4
AV47	GØ	A	565.245
AV47	GØ	A	503.845
AV47	GØ	A	632.857
AV47	GØ	A	637.78
AV47	GØ	A	1767.4
AV47	GØ	A	782.955
AV47	GØ	A	834.709
AV47	GØ	A	588.589
AV47	GØ	A	575.653
AV47	GØ	A	684.104
AV47	GØ	A	754.249
AV47	GØ	A	389.788
AV47	GØ	A	625.076
AV47	GØ	A	1648.54
AV47	GØ	A	935.368
AV47	GØ	A	528.167
AV47	GØ	A	757.663
AV47	GØ	A	492.994
AV47	GØ	A	822.604
AV47	GØ	A	566.541
AV47	GØ	A	458.336
AV47	GØ	A	589.814
AV47	GØ	A	521.879
AV47	GØ	A	834.931
AV47	GØ	A	605.546
AV47	GØ	A	905.441
AV47	GØ	A	560.183
AV47	GØ	A	322.126
AV47	GØ	A	471.661
AV47	GØ	A	715.684
AV47	GØ	A	464.822
AV47	GØ	A	568.129
AV47	GØ	A	621.295
AV47	GØ	A	519.133
AV47	GØ	A	620.172
AV47	GØ	A	581.432
AV47	GØ	A	655.694
AV47	GØ	A	505.176
AV47	GØ	A	994.755
AV47	GØ	A	807.158
AV47	GØ	A	624.402
AV47	GØ	A	427.725
AV47	GØ	A	389.015
AV47	GØ	A	565.75
AV47	GØ	A	529.01
AV47	GØ	A	903.825
AV47	GØ	A	1711.43
AV47	GØ	A	659.201
AV47	GØ	A	506.142
AV47	GØ	A	454.69
AV47	GØ	A	519.418
AV47	GØ	A	600.304
AV47	GØ	A	624.311
AV47	GØ	A	359.474
AV47	GØ	A	770.121
AV47	GØ	A	654.834
AV47	GØ	A	561.016
AV47	GØ	A	504.063
AV47	GØ	A	475.895
AV47	GØ	A	529.191
AV47	GØ	A	541.651
AV47	GØ	A	542.399
AV47	GØ	A	3510.51
AV47	GØ	A	567.264
AV47	GØ	A	912.91
AV47	GØ	A	875.802
AV47	GØ	A	787.463
AV47	GØ	A	667.739
AV47	GØ	A	662.097
AV47	GØ	A	548.434
AV47	GØ	A	705.334
AV47	GØ	A	572.52
AV47	GØ	A	739.212
AV47	GØ	A	778.816
AV47	GØ	A	580.357
AV47	GØ	A	1017.63
AV47	GØ	A	760.506
AV47	GØ	A	480.69
AV47	GØ	A	749.631
AV47	GØ	A	1007.72
AV47	GØ	A	1129.96
AV47	GØ	A	493.393
AV47	GØ	A	658.905
AV47	GØ	A	765.821
AV47	GØ	A	551.244
AV47	GØ	A	638.212
AV47	GØ	A	655.488
AV47	GØ	A	384.996
AV47	GØ	A	460.966
AV47	GØ	A	823.822
AV47	GØ	A	1066.42
AV47	GØ	A	1005.99
AV47	GØ	A	717.114
AV47	GØ	A	918.975
AV47	GØ	A	774.863
AV47	GØ	A	552.561
AV47	GØ	A	433.509
AV47	GØ	A	647.499
AV47	GØ	A	773.407
AV47	GØ	A	1043.28
AV47	GØ	A	378.906
AV47	GØ	A	1494.28
AV47	GØ	A	2354.06
AV47	GØ	A	674.199
AV47	GØ	A	748.512
AV47	GØ	A	408.06
AV47	GØ	A	517.82
AV47	GØ	A	463.542
AV47	GØ	A	721.674
AV47	GØ	A	691.408
AV47	GØ	A	424.712
AV47	GØ	A	622.163
AV47	GØ	A	399.965
AV47	GØ	A	447.433
AV47	GØ	A	687.54
AV47	GØ	A	478.449
AV47	GØ	A	621.403
AV47	GØ	A	776.732
AV47	GØ	A	950.212
AV47	GØ	A	697.479
AV47	GØ	A	1365.92
AV47	GØ	A	646.439
AV47	GØ	A	733.112
AV47	GØ	A	559.313
AV47	GØ	A	672.784
AV47	GØ	A	468.689
AV47	GØ	A	819.219
AV47	GØ	A	884.641
AV47	GØ	A	786.174
AV47	GØ	A	589.848
AV47	GØ	A	577.45
AV47	GØ	A	732.411
AV47	GØ	A	468.587
AV47	GØ	A	709.628
AV47	GØ	A	623.401
AV47	GØ	A	926.438
AV47	GØ	A	629.131
AV47	GØ	A	687.375
AV47	GØ	A	861.709
AV47	GØ	A	579.342
AV47	GØ	A	830.336
AV47	GØ	A	506.775
AV47	GØ	A	584.607
AV47	GØ	A	495.308
AV47	GØ	A	672.368
AV47	GØ	A	700.553
AV47	GØ	A	662.437
AV47	GØ	A	547.952
AV47	GØ	A	1433.65
AV47	GØ	A	445.015
AV47	GØ	A	1231.7
AV47	GØ	A	433.461
AV47	GØ	A	373.285
AV47	GØ	A	723.317
AV47	GØ	A	757.482
AV47	GØ	A	1385.6
AV47	GØ	A	482.2
AV47	GØ	A	735.505
AV47	GØ	A	432.347
AV47	GØ	A	432.193
AV47	GØ	A	599.784
AV47	GØ	A	524.631
AV47	GØ	A	1250.97
AV47	GØ	A	531.2
AV47	GØ	A	487.405
AV47	GØ	A	713.616
AV47	GØ	A	757.577
AV47	GØ	A	511.153
AV47	GØ	A	981.709
AV47	GØ	A	416.581
AV47	GØ	A	628.875
AV47	GØ	A	709.705
AV47	GØ	A	596.667
AV47	GØ	A	788.494
AV47	GØ	A	672.655
AV47	GØ	A	544.797
AV47	GØ	A	528.148
AV47	GØ	A	600.249
AV47	GØ	A	715.841
AV47	GØ	A	748.475
AV47	GØ	A	715.583
AV47	GØ	A	551.709
AV47	GØ	A	590.588
AV47	GØ	A	468.879
AV47	GØ	A	828.169
AV47	GØ	A	672.318
AV47	GØ	A	852.899
AV47	GØ	A	540.695
AV47	GØ	A	498.455
AV47	GØ	A	472.999
AV47	GØ	A	646.402
AV47	GØ	A	405.534
AV47	GØ	A	486.337
AV47	GØ	A	608.846
AV47	GØ	A	833.147
AV47	GØ	A	679.816
AV47	GØ	A	1218.68
AV47	GØ	A	615.232
AV47	GØ	A	1481.47
AV47	GØ	A	426.109
AV47	GØ	A	451.569
AV47	GØ	A	487.009
AV47	GØ	A	466.317
AV47	GØ	A	615.91
AV47	GØ	A	1130.15
AV47	GØ	A	548.692
AV47	GØ	A	547.073
AV47	GØ	A	699.968
AV47	GØ	A	585.698
AV47	GØ	A	529.904
AV47	GØ	A	809.536
AV47	GØ	A	621.159
AV47	GØ	A	782.657
AV47	GØ	A	594.452
AV47	GØ	A	419.613
AV47	GØ	A	506.03
AV47	GØ	A	913.043
AV47	GØ	A	571.874
AV47	GØ	A	386.552
AV47	GØ	A	437.863
AV47	GØ	A	1092.61
AV47	GØ	A	588.036
AV47	GØ	A	851.243
AV47	GØ	A	344.038
AV47	GØ	A	455.735
AV47	GØ	A	365.793
AV47	GØ	A	748.1
AV47	GØ	A	615.516
AV47	GØ	A	827.226
AV47	GØ	A	563.013
AV47	GØ	A	654.758
AV47	GØ	A	556.415
AV47	GØ	A	817.079
AV47	GØ	A	869.524
AV47	GØ	A	775.995
AV47	GØ	A	661.563
AV47	GØ	A	673.117
AV47	GØ	A	651.668
AV47	GØ	A	669.28
AV47	GØ	A	533.304
AV47	GØ	A	422.137
AV47	GØ	A	626.942
AV47	GØ	A	2092.42
AV47	GØ	A	500.838
AV47	GØ	A	683.685
AV47	GØ	A	761.531
AV47	GØ	A	335.114
AV47	GØ	A	539.204
AV47	GØ	A	698.438
AV47	GØ	A	764.709
AV47	GØ	A	461.535
AV47	GØ	A	384.123
AV47	GØ	A	570.313
AV47	GØ	A	389.598
AV47	GØ	A	440.41
AV47	GØ	A	926.51
AV47	GØ	A	590.488
AV47	GØ	A	681.791
AV47	GØ	A	657.358
AV47	GØ	A	862.74
AV47	GØ	A	364.371
AV47	GØ	A	476.677
AV47	GØ	A	367.444
AV47	GØ	A	775.156
AV47	GØ	A	712.037
AV47	GØ	A	601.579
AV47	GØ	A	397.274
AV47	G20	A	53.3819
AV47	G20	A	85.6418
AV47	G20	A	42.6159
AV47	G20	A	30.1143
AV47	G20	A	32.8154
AV47	G20	A	38.3249
AV47	G20	A	29.0651
AV47	G20	A	31.6854
AV47	G20	A	76.2091
AV47	G20	A	43.9247
AV47	G20	A	47.0992
AV47	G20	A	28.5465
AV47	G20	A	40.6101
AV47	G20	A	31.5063
AV47	G20	A	34.7504
AV47	G20	A	34.9
AV47	G20	A	26.512
AV47	G20	A	38.3519
AV47	G20	A	61.08
AV47	G20	A	110.862
AV47	G20	A	40.9931
AV47	G20	A	29.2661
AV47	G20	A	25.1946
AV47	G20	A	27.9984
AV47	G20	A	28.3395
AV47	G20	A	36.042
AV47	G20	A	29.5192
AV47	G20	A	35.1078
AV47	G20	A	31.8319
AV47	G20	A	30.7096
AV47	G20	A	46.8637
AV47	G20	A	24.4814
AV47	G20	A	50.9202
AV47	G20	A	24.9542
AV47	G20	A	34.9569
AV47	G20	A	28.9476
AV47	G20	A	71.3002
AV47	G20	A	27.3613
AV47	G20	A	41.9155
AV47	G20	A	46.3313
AV47	G20	A	42.4005
AV47	G20	A	38.9162
AV47	G20	A	31.5008
AV47	G20	A	27.0559
AV47	G20	A	35.3768
AV47	G20	A	25.0043
AV47	G20	A	31.0344
AV47	G20	A	35.1215
AV47	G20	A	36.7065
AV47	G20	A	26.7749
AV47	G20	A	28.7504
AV47	G20	A	36.4295
AV47	G20	A	42.9763
AV47	G20	A	63.6419
AV47	G20	A	38.3459
AV47	G20	A	33.6969
AV47	G20	A	45.522
AV47	G20	A	36.4825
AV47	G20	A	23.5835
AV47	G20	A	27.4101
AV47	G20	A	30.0537
AV47	G20	A	29.3289
AV47	G20	A	23.5767
AV47	G20	A	139.24
AV47	G20	A	33.8954
AV47	G20	A	35.4117
AV47	G20	A	32.5527
AV47	G20	A	30.5403
AV47	G20	A	38.5342
AV47	G20	A	27.8307
AV47	G20	A	25.4791
AV47	G20	A	25.148
AV47	G20	A	34.4273
AV47	G20	A	34.6273
AV47	G20	A	29.9669
AV47	G20	A	67.3841
AV47	G20	A	65.4362
AV47	G20	A	91.8056
AV47	G20	A	47.2283
AV47	G20	A	31.1386
AV47	G20	A	155.116
AV47	G20	A	24.7174
AV47	G20	A	31.9295
AV47	G20	A	36.9259
AV47	G20	A	32.3409
AV47	G20	A	36.5514
AV47	G20	A	37.9188
AV47	G20	A	32.9473
AV47	G20	A	79.3452
AV47	G20	A	36.4566
AV47	G20	A	33.0132
AV47	G20	A	34.5086
AV47	G20	A	53.8455
AV47	G20	A	31.0589
AV47	G20	A	33.1768
AV47	G20	A	38.6009
AV47	G20	A	37.4274
AV47	G20	A	31.8725
AV47	G20	A	35.8803
AV47	G20	A	139.913
AV47	G20	A	26.9182
AV47	G20	A	40.5133
AV47	G20	A	34.2422
AV47	G20	A	33.4302
AV47	G20	A	31.5486
AV47	G20	A	34.4807
AV47	G20	A	36.2694
AV47	G20	A	70.1416
AV47	G20	A	27.2823
AV47	G20	A	33.5262
AV47	G20	A	31.3681
AV47	G20	A	80.7268
AV47	G20	A	51.4656
AV47	G20	A	38.4339
AV47	G20	A	42.1886
AV47	G20	A	29.9786
AV47	G20	A	38.4694
AV47	G20	A	23.7993
AV47	G20	A	38.1093
AV47	G20	A	43.8281
AV47	G20	A	28.32
AV47	G20	A	37.285
AV47	G20	A	41.4901
AV47	G20	A	38.6329
AV47	G20	A	30.58
AV47	G20	A	38.9473
AV47	G20	A	26.5561
AV47	G20	A	34.501
AV47	G20	A	37.8512
AV47	G20	A	36.1686
AV47	G20	A	25.599
AV47	G20	A	40.4357
AV47	G20	A	29.4391
AV47	G20	A	40.4572
AV47	G20	A	24.1082
AV47	G20	A	35.5158
AV47	G20	A	31.1623
AV47	G20	A	27.687
AV47	G20	A	44.1094
AV47	G20	A	34.0194
AV47	G20	A	37.3977
AV47	G20	A	30.5546
AV47	G20	A	65.1805
AV47	G20	A	24.1597
AV47	G20	A	29.0985
AV47	G20	A	54.5687
AV47	G20	A	43.7748
AV47	G20	A	35.1893
AV47	G20	A	35.1861
AV47	G20	A	40.6947
AV47	G20	A	34.9469
AV47	G20	A	44.3238
AV47	G20	A	28.7792
AV47	G20	A	88.9595
AV47	G20	A	31.9317
AV47	G20	A	40.5624
AV47	G20	A	100.667
AV47	G20	A	31.825
AV47	G20	A	27.8159
AV47	G20	A	33.8875
AV47	G20	A	30.6858
AV47	G20	A	25.6165
AV47	G20	A	29.3517
AV47	G20	A	63.8228
AV47	G20	A	29.8699
AV47	G20	A	50.6237
AV47	G20	A	22.1564
AV47	G20	A	52.7485
AV47	G20	A	32.9244
AV47	G20	A	24.8083
AV47	G20	A	31.8393
AV47	G20	A	23.2423
AV47	G20	A	23.7736
AV47	G20	A	31.4719
AV47	G20	A	89.5506
AV47	G20	A	33.104
AV47	G20	A	25.3118
AV47	G20	A	28.792
AV47	G20	A	28.0248
AV47	G20	A	30.5891
AV47	G20	A	42.3624
AV47	G20	A	22.4848
AV47	G20	A	25.6743
AV47	G20	A	38.8382
AV47	G20	A	38.0549
AV47	G20	A	35.9493
AV47	G20	A	33.0154
AV47	G20	A	32.9819
AV47	G20	A	28.0168
AV47	G20	A	27.998
AV47	G20	A	35.4149
AV47	G20	A	30.9226
AV47	G20	A	46.9327
AV47	G20	A	35.5445
AV47	G20	A	54.4434
AV47	G20	A	31.589
AV47	G20	A	33.6133
AV47	G20	A	29.3892
AV47	G20	A	54.004
AV47	G20	A	76.4965
AV47	G20	A	24.477
AV47	G20	A	39.6543
AV47	G20	A	44.7605
AV47	G20	A	35.266
AV47	G20	A	34.106
AV47	G20	A	28.7244
AV47	G20	A	38.3139
AV47	G20	A	54.447
AV47	G20	A	31.6111
AV47	G20	A	36.218
AV47	G20	A	30.0215
AV47	G20	A	31.421
AV47	G20	A	44.2932
AV47	G20	A	33.7697
AV47	G20	A	37.7639
AV47	G20	A	40.0867
AV47	G20	A	155.972
AV47	G20	A	32.9059
AV47	G20	A	183.545
AV47	G20	A	43.4861
AV47	G20	A	35.6046
AV47	G20	A	48.5849
AV47	G20	A	34.7889
AV47	G20	A	32.2286
AV47	G20	A	245.935
AV47	G20	A	39.5083
AV47	G20	A	37.3734
AV47	G20	A	31.0385
AV47	G20	A	46.9435
AV47	G20	A	35.7202
AV47	G20	A	105.299
AV47	G20	A	34.4853
AV47	G20	A	97.7814
AV47	G20	A	28.7342
AV47	G20	A	31.5406
AV47	G20	A	29.8958
AV47	G20	A	45.3528
AV47	G20	A	29.9572
AV47	G20	A	34.6319
AV47	G20	A	37.6176
AV47	G20	A	21.7933
AV47	G20	A	30.0747
AV47	G20	A	22.3167
AV47	G20	A	25.5945
AV47	G20	A	27.7789
AV47	G20	A	108.199
AV47	G20	A	63.0595
AV47	G20	A	24.0414
AV47	G20	A	23.8461
AV47	G20	A	26.2672
AV47	G20	A	28.1676
AV47	G20	A	24.4617
AV47	G20	A	81.4629
AV47	G20	A	28.3203
AV47	G20	A	22.5098
AV47	G20	A	53.5242
AV47	G20	A	27.8354
AV47	G20	A	35.9063
AV47	G20	A	30.4831
AV47	G20	A	17.8826
AV47	G20	A	30.3114
AV47	G20	A	73.8744
AV47	G20	A	28.0531
AV47	G20	A	43.9427
AV47	G20	A	36.6658
AV47	G20	A	32.2609
AV47	G20	A	34.403
AV47	G20	A	39.0636
AV47	G20	A	46.3957
AV47	G20	A	32.4551
AV47	G20	A	34.6218
AV47	G20	A	27.8676
AV47	G20	A	36.1562
AV47	G20	A	32.7611
AV47	G20	A	36.5183
AV47	G20	A	41.1149
AV47	G20	A	27.2585
AV47	G20	A	119.162
AV47	G20	A	23.9483
AV47	G20	A	24.643
AV47	G20	A	27.2176
AV47	G20	A	55.9243
AV47	G20	A	101.491
AV47	G20	A	25.5247
AV47	G20	A	106.798
AV47	G20	A	42.4637
AV47	G20	A	29.2507
AV47	G20	A	36.0227
AV47	G20	A	28.9262
AV47	G20	A	30.8956
AV47	G20	A	34.622
AV47	G20	A	40.2222
AV47	G20	A	45.3327
AV47	G20	A	76.9951
AV47	G20	A	36.2914
AV47	G20	A	37.7548
AV47	G20	A	38.3023
AV47	G20	A	38.8444
AV47	G20	A	27.0232
AV47	G20	A	57.7921
AV47	G20	A	33.8809
AV47	G20	A	35.7547
AV47	G20	A	162.19
AV47	G20	A	32.661
AV47	G20	A	46.5505
AV47	G20	A	54.729
AV47	G20	A	31.7015
AV47	G20	A	31.9593
AV47	G20	A	28.6292
AV47	G20	A	28.7971
AV47	G20	A	31.3334
AV47	G20	A	52.7404
AV47	G20	A	103.508
AV47	G20	A	49.4755
AV47	G20	A	40.3718
AV47	G20	A	36.6271
AV47	G20	A	27.4431
AV47	G20	A	30.1129
AV47	G20	A	49.325
AV47	G20	A	31.2244
AV47	G20	A	41.8836
AV47	G20	A	46.3418
AV47	G20	A	30.7049
AV47	G20	A	37.2768
AV47	G20	A	64.8361
AV47	G20	A	31.3695
AV47	G20	A	28.2656
AV47	G20	A	21.4167
AV47	G20	A	36.5777
AV47	G20	A	28.471
AV47	G20	A	17.0128
AV47	G20	A	24.3456
AV47	G20	A	95.2145
AV47	G20	A	23.1914
AV47	G20	A	24.5884
AV47	G20	A	30.9046
AV47	G20	A	37.107
AV47	G20	A	41.1206
AV47	G20	A	38.3687
AV47	G20	A	37.2887
AV47	G20	A	62.5708
AV47	G20	A	43.1927
AV47	G20	A	46.3333
AV47	G20	A	27.7401
AV47	G20	A	38.1067
AV47	G20	A	34.0212
AV47	G20	A	33.1992
AV47	G20	A	37.5022
AV47	G20	A	37.8265
AV47	G20	A	35.9432
AV47	G20	A	35.6583
AV47	G20	A	57.453
AV47	G20	A	34.1522
AV47	G20	A	31.4525
AV47	G20	A	38.1519
AV47	G20	A	43.043
AV47	G20	A	43.1882
AV47	G20	A	32.4527
AV47	G20	A	32.1086
AV47	G20	A	69.5554
AV47	G20	A	34.4538
AV47	G20	A	31.7387
AV47	G20	A	41.4745
AV47	G20	A	32.5738
AV47	G20	A	50.3553
AV47	G20	A	37.7276
AV47	G20	A	30.217
AV47	G20	A	28.7511
AV47	G20	A	32.0894
AV47	G20	A	39.9854
AV47	G20	A	36.2155
AV47	G20	A	32.1805
AV47	G20	A	41.5489
AV47	G20	A	35.3644
AV47	G20	A	32.3137
AV47	G20	A	28.9954
AV47	G20	A	37.6081
AV47	G20	A	29.0601
AV47	G20	A	43.1024
AV47	G20	A	29.3432
AV47	G20	A	30.3442
AV47	G20	A	34.5592
AV47	G20	A	47.8266
AV47	G20	A	33.4928
AV47	G20	A	49.5342
AV47	G20	A	43.3913
AV47	G20	A	26.8225
AV47	G20	A	46.0226
AV47	G20	A	29.18
AV47	G20	A	31.5228
AV47	G20	A	39.3717
AV47	G20	A	46.2572
AV47	G20	A	36.9005
AV47	G20	A	38.806
AV47	G20	A	24.3781
AV47	G20	A	30.1795
AV47	G20	A	31.5875
AV47	G20	A	36.249
AV47	G20	A	26.9074
AV47	G20	A	31.1589
AV47	G20	A	30.5529
AV47	G20	A	39.1676
AV47	G20	A	41.1029
AV47	G20	A	28.3569
AV47	G20	A	53.5721
AV47	G20	A	38.7326
AV47	G20	A	28.7041
AV47	G20	A	22.8439
AV47	G20	A	21.4012
AV47	G20	A	60.3249
AV47	G20	A	19.1806
AV47	G20	A	29.5079
AV47	G20	A	29.6287
AV47	G20	A	77.0637
AV47	G20	A	51.8712
AV47	G20	A	33.0265
AV47	G20	A	33.5713
AV47	G20	A	30.0168
AV47	G20	A	39.6975
AV47	G20	A	43.1583
AV47	G20	A	73.7996
AV47	G20	A	34.9133
AV47	G20	A	38.1065
AV47	G20	A	83.9536
AV47	G20	A	33.4433
AV47	G20	A	32.0759
AV47	G20	A	130.634
AV47	G20	A	80.1747
AV47	G20	A	105.128
AV47	G20	A	30.8277
AV47	G20	A	34.4818
AV47	G20	A	37.9277
AV47	G20	A	25.7058
AV47	G20	A	76.0619
AV47	G20	A	27.096
AV47	G20	A	35.865
AV47	G20	A	27.3924
AV47	G20	A	27.6802
AV47	G20	A	30.1291
AV47	G20	A	28.2635
AV47	G20	A	43.4485
AV47	G20	A	33.9453
AV47	G20	A	83.5855
AV47	G20	A	26.0535
AV47	G20	A	44.0792
AV47	G20	A	95.2575
AV47	G20	A	57.6825
AV47	G20	A	30.3923
AV47	G20	A	23.2628
AV47	G20	A	29.9939
AV47	G20	A	31.381
AV47	G20	A	63.5192
AV47	G20	A	24.0583
AV47	G20	A	33.702
AV47	G20	A	37.1525
AV47	G20	A	59.3934
AV47	G20	A	63.048
AV47	G20	A	32.2183
AV47	G20	A	95.8313
AV47	G20	A	47.5444
AV47	G20	A	83.9368
AV47	G20	A	30.2924
AV47	G20	A	94.5717
AV47	G20	A	27.0359
AV47	G20	A	110.652
AV47	G20	A	25.2374
AV47	G20	A	29.1892
AV47	G20	A	41.4329
AV47	G20	A	24.4862
AV47	G20	A	31.9274
AV47	G20	A	24.5912
AV47	G20	A	20.648
AV47	G20	A	41.8724
AV47	G20	A	36.8503
AV47	G20	A	40.1597
AV47	G20	A	28.1834
AV47	G20	A	34.7864
AV47	G20	A	28.957
AV47	G20	A	37.0206
AV47	G20	A	25.3625
AV47	G20	A	196.686
AV47	G20	A	35.1607
AV47	G20	A	44.6613
AV47	G20	A	47.6356
AV47	G20	A	37.6808
AV47	G20	A	34.5704
AV47	G20	A	30.2474
AV47	G20	A	28.869
AV47	G20	A	77.9728
AV47	G20	A	35.1981
AV47	G20	A	40.6629
AV47	G20	A	69.3312
AV47	G20	A	39.9443
AV47	G20	A	43.5354
AV47	G20	A	33.5889
AV47	G20	A	38.4343
AV47	G20	A	39.5463
AV47	G20	A	35.3561
AV47	G20	A	30.3921
AV47	G20	A	33.2574
AV47	G20	A	26.0127
AV47	G20	A	23.9501
AV47	G20	A	51.5969
AV47	G20	A	35.048
AV47	G20	A	27.7151
AV47	G20	A	37.3527
AV47	G20	A	29.9402
AV47	G20	A	37.0164
AV47	G20	A	55.3462
AV47	G20	A	41.4599
AV47	G20	A	55.9725
AV47	G20	A	102.735
AV47	G20	A	50.2481
AV47	G20	A	35.5167
AV47	G20	A	32.0484
AV47	G20	A	38.6273
AV47	G20	A	26.8129
AV47	G20	A	19.7288
AV47	G20	A	83.3908
AV47	G20	A	35.1598
AV47	G20	A	32.9055
AV47	G20	A	27.5827
AV47	G20	A	22.8047
AV47	G20	A	34.9666
AV47	G20	A	45.9226
AV47	G20	A	52.9321
AV47	G20	A	28.1843
AV47	G20	A	43.5961
AV47	G20	A	34.0015
AV47	G20	A	29.774
AV47	G20	A	39.9746
AV47	G20	A	24.7031
AV47	G20	A	31.8495
AV47	G20	A	19.2095
AV47	G20	A	35.6909
AV47	G20	A	21.5566
AV47	G20	A	23.8298
AV47	G20	A	28.3862
AV47	G20	A	26.8068
AV47	G20	A	42.6137
AV47	G20	A	21.3747
AV47	G20	A	18.4866
AV47	G20	A	37.6468
AV47	G20	A	29.891
AV47	G20	A	35.1836
AV47	G20	A	30.1617
AV47	G20	A	35.4022
AV47	G20	A	121.761
AV47	G20	A	47.331
AV47	G20	A	57.4713
AV47	G20	A	25.7237
AV47	G20	A	28.6311
AV47	G20	A	26.6258
AV47	G20	A	41.445
AV47	G20	A	38.1487
AV47	G20	A	31.8105
AV47	G20	A	33.0094
AV47	G20	A	26.1966
AV47	G20	A	29.828
AV47	G20	A	35.8078
AV47	G20	A	30.3338
AV47	G20	A	41.7249
AV47	G20	A	33.7727
AV47	G20	A	27.5725
AV47	G20	A	29.5675
AV47	G20	A	34.7025
AV47	G20	A	27.9904
AV47	G20	A	29.8748
AV47	G20	A	30.0325
AV47	G20	A	20.9814
AV47	G20	A	30.7573
AV47	G20	A	30.4941
AV47	G20	A	31.493
AV47	G20	A	35.6002
AV47	G20	A	30.5155
AV47	G20	A	53.2371
AV47	G20	A	27.2871
AV47	G20	A	24.8006
AV47	G20	A	28.0916
AV47	G20	A	55.2361
AV47	G20	A	89.8328
AV47	G20	A	27.3887
AV47	G20	A	52.0472
AV47	G20	A	45.9713
AV47	G20	A	29.246
AV47	G20	A	34.7305
AV47	G20	A	36.1272
AV47	G20	A	43.8402
AV47	G20	A	30.5506
AV47	G20	A	27.1932
AV47	G20	A	41.9544
AV47	G20	A	32.8474
AV47	G20	A	56.7793
AV47	G20	A	114.521
AV47	G20	A	37.4946
AV47	G20	A	41.1995
AV47	G20	A	18.8912
AV47	G20	A	32.8629
AV47	G20	A	36.6225
AV47	G20	A	41.1154
AV47	G20	A	30.8737
AV47	G20	A	51.567
AV47	G20	A	26.6241
AV47	G20	A	35.4489
AV47	G20	A	37.9515
AV47	G20	A	31.0743
AV47	G20	A	42.1091
AV47	G20	A	68.7169
AV47	G20	A	37.3527
AV47	G20	A	33.3522
AV47	G20	A	36.7146
AV47	G20	A	39.1141
AV47	G20	A	27.2214
AV47	G20	A	53.9058
AV47	G20	A	33.7237
AV47	G20	A	25.3615
AV47	G20	A	33.6179
AV47	G20	A	40.4764
AV47	G20	A	37.4394
AV47	G20	A	37.5068
AV47	G20	A	23.6369
AV47	G20	A	81.4291
AV47	G20	A	35.8262
AV47	G20	A	58.1581
AV47	G20	A	58.1044
AV47	G20	A	24.639
AV47	G20	A	32.4393
AV47	G20	A	40.3076
AV47	G20	A	61.4718
AV47	G20	A	31.6449
AV47	G20	A	35.9821
AV47	G20	A	35.08
AV47	G20	A	26.6062
AV47	G20	A	24.9013
AV47	G20	A	38.1774
AV47	G20	A	48.8986
AV47	G20	A	55.9891
AV47	G20	A	31.2347
AV47	G20	A	16.6028
AV47	G20	A	35.2221
AV47	G20	A	38.9394
AV47	G20	A	35.5891
AV47	G20	A	36.6122
AV47	G20	A	37.1013
AV47	G20	A	83.9501
AV47	G20	A	27.8814
AV47	G20	A	22.711
AV47	G20	A	23.0687
AV47	G20	A	35.0599
AV47	G20	A	37.4731
AV47	G20	A	27.4817
AV47	G20	A	34.0226
AV47	G20	A	106.312
AV47	G20	A	33.445
AV47	G20	A	66.6159
AV47	G20	A	30.2669
AV47	G20	A	132.912
AV47	G20	A	110.331
AV47	G20	A	35.6021
AV47	G20	A	84.1229
AV47	G20	A	29.4867
AV47	G20	A	27.7729
AV47	G20	A	21.8072
AV47	G20	A	32.2987
AV47	G20	A	33.238
AV47	G20	A	29.9891
AV47	G20	A	42.3354
AV47	G20	A	44.8569
AV47	G20	A	57.7342
AV47	G20	A	40.1795
AV47	G20	A	46.2533
AV47	G20	A	31.5412
AV47	G20	A	58.886
AV47	G20	A	39.4645
AV47	G20	A	22.9313
AV47	G20	A	46.3079
AV47	G20	A	34.8803
AV47	G20	A	44.3286
AV47	G20	A	59.9966
AV47	G20	A	39.8218
AV47	G20	A	45.2907
AV47	G20	A	30.1159
AV47	G20	A	31.1563
AV47	G20	A	29.8633
AV47	G20	A	50.9087
AV47	G20	A	33.6169
AV47	G20	A	44.6019
AV47	G20	A	35.1934
AV47	G20	A	33.9838
AV47	G20	A	32.2818
AV47	G20	A	29.003
AV47	G20	A	38.4218
AV47	G20	A	46.5541
AV47	G20	A	31.7018
AV47	G20	A	49.8018
AV47	G20	A	99.6602
AV47	G20	A	90.973
AV47	G20	A	30.0786
AV47	G20	A	24.0584
AV47	G20	A	30.8732
AV47	G20	A	28.5845
AV47	G20	A	33.9448
AV47	G20	A	49.4997
AV47	G20	A	30.2259
AV47	G20	A	28.9328
AV47	G20	A	146.404
AV47	G20	A	112.297
AV47	G20	A	27.807
AV47	G20	A	30.4137
AV47	G20	A	33.2582
AV47	G20	A	37.8909
AV47	G20	A	40.0069
AV47	G20	A	30.538
AV47	G20	A	38.2028
AV47	G20	A	43.768
AV47	G20	A	35.9561
AV47	G20	A	37.4871
AV47	G20	A	30.0285
AV47	G20	A	29.3036
AV47	G20	A	63.2282
AV47	G20	A	38.2178
AV47	G20	A	37.7968
AV47	G20	A	29.7792
AV47	G20	A	23.2051
AV47	G20	A	37.1522
AV47	G20	A	35.8857
AV47	G20	A	38.1323
AV47	G20	A	143.476
AV47	G20	A	43.8087
AV47	G20	A	30.3536
AV47	G20	A	33.2366
AV47	G20	A	30.7754
AV47	G20	A	27.2154
AV47	G20	A	28.4254
AV47	G20	A	32.8088
AV47	G20	A	25.1729
AV47	G20	A	89.3201
AV47	G20	A	33.223
AV47	G20	A	86.4181
AV47	G20	A	31.5135
AV47	G20	A	29.2037
AV47	G20	A	29.6845
AV47	G20	A	32.0702
AV47	G20	A	29.0641
AV47	G20	A	24.5282
AV47	G20	A	47.0536
AV47	G20	A	32.2921
AV47	G20	A	33.9347
AV47	G20	A	27.0369
AV47	G20	A	33.9194
AV47	G20	A	65.8598
AV47	G20	A	31.8032
AV47	G20	A	37.7512
AV47	G20	A	30.1317
AV47	G20	A	27.7886
AV47	G20	A	31.4772
AV47	G20	A	35.4307
AV47	G20	A	32.4425
AV47	G20	A	43.8514
AV47	G20	A	113.821
AV47	G20	A	34.4331
AV47	G20	A	31.0903
AV47	G20	A	67.4814
AV47	G20	A	32.0017
AV47	G20	A	38.9247
AV47	G20	A	46.5294
AV47	G20	A	43.6059
AV47	G20	A	37.3249
AV47	G20	A	33.9617
AV47	G20	A	88.2489
AV47	G20	A	24.4792
AV47	G20	A	52.5501
AV47	G20	A	31.7218
AV47	G20	A	35.8244
AV47	G20	A	30.3367
AV47	G20	A	41.7809
AV47	G20	A	25.5173
AV47	G20	A	43.2094
AV47	G20	A	27.1806
AV47	G20	A	19.5244
AV47	G20	A	26.3372
AV47	G20	A	95.3063
AV47	G20	A	37.5504
AV47	G20	A	52.3105
AV47	G20	A	75.7141
AV47	G20	A	91.7254
AV47	G20	A	29.1869
AV47	G20	A	24.5189
AV47	G20	A	39.4144
AV47	G20	A	39.4072
AV47	G20	A	38.3358
AV47	G20	A	101.658
AV47	G20	A	34.743
AV47	G20	A	30.4209
AV47	G20	A	27.2418
AV47	G20	A	56.5296
AV47	G20	A	27.5567
AV47	G20	A	32.3355
AV47	G20	A	35.7052
AV47	G20	A	29.7354
AV47	G20	A	37.745
AV47	G20	A	32.4468
AV47	G20	A	25.9025
AV47	G20	A	29.6821
AV47	G20	A	67.6057
AV47	G20	A	52.3874
AV47	G20	A	31.8552
AV47	G20	A	34.932
AV47	G20	A	31.2166
AV47	G20	A	33.2767
AV47	G20	A	86.2283
AV47	G20	A	26.3688
AV47	G20	A	39.7457
AV47	G20	A	31.42
AV47	G20	A	26.4674
AV47	G20	A	34.2829
AV47	G20	A	38.8967
AV47	G20	A	25.9003
AV47	G20	A	29.6672
AV47	G20	A	140.853
AV47	G20	A	47.3462
AV47	G20	A	35.4009
AV47	G20	A	21.5498
AV47	G20	A	31.9563
AV47	G20	A	47.5187
AV47	G20	A	25.0515
AV47	G20	A	33.628
AV47	G20	A	22.2711
AV47	G20	A	26.6271
AV47	G20	A	32.1736
AV47	G20	A	24.5797
AV47	G20	A	34.1906
AV47	G20	A	29.4979
AV47	G20	A	35.4497
AV47	G20	A	37.376
AV47	G20	A	55.223
AV47	G20	A	30.6054
AV47	G20	A	29.4002
AV47	G20	A	42.177
AV47	G20	A	29.9582
AV47	G20	A	38.0037
AV47	G20	A	24.8085
AV47	G20	A	34.7261
AV47	G20	A	33.5424
AV47	G20	A	29.1983
AV47	G20	A	45.0178
AV47	G20	A	24.3119
AV47	G20	A	134.308
AV47	G20	A	42.0526
AV47	G20	A	31.8302
AV47	G20	A	36.7659
AV47	G20	A	24.9521
AV47	G20	A	52.3669
AV47	G20	A	32.8718
AV47	G20	A	106.32
AV47	G20	A	48.2417
AV47	G20	A	56.6163
AV47	G20	A	37.7119
AV47	G20	A	31.0002
AV47	G20	A	35.8963
AV47	G20	A	50.0717
AV47	G20	A	38.9262
AV47	G20	A	134.054
AV47	G20	A	33.8963
AV47	G20	A	45.0326
AV47	G20	A	30.2274
AV47	G20	A	27.5977
AV47	G20	A	43.9275
AV47	G20	A	28.6016
AV47	G20	A	32.5393
AV47	G20	A	152.531
AV47	G20	A	27.2158
AV47	G20	A	32.3357
AV47	G20	A	41.2949
AV47	G20	A	31.6615
AV47	G20	A	37.6999
AV47	G20	A	35.79
AV47	G20	A	31.0832
AV47	G20	A	38.8025
AV47	G20	A	48.2978
AV47	G20	A	62.6506
AV47	G20	A	55.2083
AV47	G20	A	191.515
AV47	G20	A	70.9831
AV47	G20	A	25.8779
AV47	G20	A	46.2687
AV47	G20	A	51.7535
AV47	G20	A	104.403
AV47	G20	A	40.9432
AV47	G20	A	31.1491
AV47	G20	A	31.8165
AV47	G20	A	38.3323
AV47	G20	A	73.6753
AV47	G20	A	31.3231
AV47	G20	A	38.3892
AV47	G20	A	30.016
AV47	G20	A	33.7854
AV47	G20	A	26.4223
AV47	G20	A	34.1207
AV47	G20	A	21.2793
AV47	G20	A	26.8357
AV47	G20	A	23.1382
AV47	G20	A	30.6079
AV47	G20	A	69.3515
AV47	G20	A	64.4401
AV47	G20	A	21.9192
AV47	G20	A	19.861
AV47	G20	A	50.8035
AV47	G20	A	130.748
AV47	G20	A	31.9869
AV47	G20	A	54.393
AV47	G20	A	41.0371
AV47	G20	A	177.15
AV47	G20	A	39.1767
AV47	G20	A	33.2768
AV47	G20	A	68.3404
AV47	G20	A	34.6154
AV47	G20	A	43.0263
AV47	G20	A	185.161
AV47	G20	A	28.4922
AV47	G20	A	36.6698
AV47	G20	A	32.0889
AV47	G20	A	41.7782
AV47	G20	A	44.2654
AV47	G20	A	172.627
AV47	G20	A	31.681
AV47	G20	A	38.3868
AV47	G20	A	27.5153
AV47	G20	A	118.954
AV47	G20	A	34.8578
AV47	G20	A	45.0178
AV47	G20	A	32.4384
AV47	G20	A	44.2026
AV47	G20	A	28.734
AV47	G20	A	48.5764
AV47	G20	A	35.5742
AV47	G20	A	32.7646
AV47	G20	A	36.6638
AV47	G20	A	41.6325
AV47	G20	A	63.6215
AV47	G20	A	32.3732
AV47	G20	A	48.2354
AV47	G20	A	30.4646
AV47	G20	A	31.1073
AV47	G20	A	34.9814
AV47	G20	A	51.3394
AV47	G20	A	53.213
AV47	G20	A	62.5562
AV47	G20	A	64.2953
AV47	G20	A	41.3414
AV47	G20	A	32.8777
AV47	G20	A	46.8412
AV47	G20	A	33.4435
AV47	G20	A	33.7948
AV47	G20	A	37.4247
AV47	G20	A	31.1036
AV47	G20	A	32.9332
AV47	G20	A	38.048
AV47	G20	A	30.01
AV47	G20	A	38.2255
AV47	G20	A	31.2166
AV47	G20	A	33.7704
AV47	G20	A	24.6791
AV47	G20	A	35.8773
AV47	G20	A	78.4814
AV47	G20	A	24.3469
AV47	G20	A	34.2833
AV47	G20	A	35.6628
AV47	G20	A	46.835
AV47	G20	A	27.4308
AV47	G20	A	25.236
AV47	G20	A	73.5602
AV47	G20	A	100.885
AV47	G20	A	78.9824
AV47	G20	A	35.9756
AV47	G20	A	23.8601
AV47	G20	A	31.9531
AV47	G20	A	29.2861
AV47	G20	A	25.5804
AV47	G20	A	33.2941
AV47	G20	A	28.8811
AV47	G20	A	33.4799
AV47	G20	A	46.9415
AV47	G20	A	39.9606
AV47	G20	A	25.7852
AV47	G20	A	31.5575
AV47	G20	A	25.867
AV47	G20	A	38.8041
AV47	G20	A	30.7611
AV47	G20	A	43.2611
AV47	G20	A	33.299
AV47	G20	A	32.4899
AV47	G20	A	61.89
AV47	G20	A	34.9576
AV47	G20	A	33.524
AV47	G20	A	77.0032
AV47	G20	A	80.2811
AV47	G20	A	51.4671
AV47	G20	A	76.0459
AV47	G20	A	33.2815
AV47	G20	A	32.0881
AV47	G20	A	33.1243
AV47	G20	A	33.1982
AV47	G20	A	50.3921
AV47	G20	A	36.0005
AV47	G20	A	67.1361
AV47	G20	A	31.9035
AV47	G20	A	57.9764
AV47	G20	A	33.1559
AV47	G20	A	25.6794
AV47	G20	A	155.149
AV47	G20	A	39.8002
AV47	G20	A	43.0286
AV47	G20	A	45.6143
AV47	G20	A	54.7017
AV47	G20	A	40.189
AV47	G20	A	36.754
AV47	G20	A	29.2235
AV47	G20	A	32.5144
AV47	G20	A	130.461
AV47	G20	A	39.0022
AV47	G20	A	35.0111
AV47	G20	A	30.8323
AV47	G20	A	25.4549
AV47	G20	A	66.3672
AV47	G20	A	29.5712
AV47	G20	A	29.8657
AV47	G20	A	125.406
AV47	G20	A	39.5475
AV47	G20	A	52.0007
AV47	G20	A	24.5002
AV47	G20	A	31.1192
AV47	G20	A	36.8044
[truncated: 23,499 more rows]

[truncated: 2 more sheets: Fig1S5, Fig1S6]
