# Supplementary material for: Class-A penicillin binding proteins do not contribute to cell shape but repair cell-wall defects
Source: eLife journal article supplement (doi:10.7554/elife.51998), 2020-01-06
Supplement: supp [file elife-51998-supp-v1.zip › elife_poa_e51998_Figure_2_source_data_1.xlsx]

## Sheet: Fig2A
UPLC profile						PG amount
Retention time (min)	AV84 GØ-RØ	AV84 G14-R20	AV84 G20-RØ	AV105 GØ-RØ		Sample	R1	R2	R3
2	6.50879e-05	0.000185293	9.20922e-05	9.95993e-05		AV84 GØ-RØ	107.423	103.693	88.8842
2.00167	6.20759e-05	0.000193796	8.96949e-05	9.69873e-05		AV84 G14-R20	93.9533	114.032	111.174
2.00333	5.93287e-05	0.000200762	8.68491e-05	9.38826e-05		AV84 G20-RØ	55.9728	71.7953	51.6396
2.005	5.68334e-05	0.00020593	8.36611e-05	9.04104e-05		AV105 GØ-RØ	50.7393	69.2996	61.5409
2.00667	5.45805e-05	0.000209103	8.02471e-05	8.66762e-05
2.00833	5.25408e-05	0.000210146	7.67181e-05	8.27793e-05		Content analysis
2.01	5.06807e-05	0.000209019	7.31589e-05	7.88174e-05			AV84 GØ-RØ	AV84 GØ-RØ	AV84 GØ-RØ	AV84 G14-R20	AV84 G14-R20	AV84 G14-R20	AV84 G20-RØ	AV84 G20-RØ	AV84 G20-RØ	AV105 GØ-RØ	AV105 GØ-RØ	AV105 GØ-RØ
2.01167	4.89711e-05	0.000205773	6.96327e-05	7.48723e-05			R1	R2	R3	R1	R2	R3	R1	R2	R3	R1	R2	R3
2.01333	4.73966e-05	0.000200585	6.62092e-05	7.10237e-05		Monomers (%)	62.9894	59.4252	59.6729	68.8874	66.5002	67.7296	61.4479	62.5283	62.4799	65.4471	62.3499	61.7532
2.015	4.59515e-05	0.00019372	6.29497e-05	6.73387e-05		Dimers (%)	32.8368	35.0483	34.5973	28.9189	30.5448	29.9309	33.0383	33.0282	33.3186	30.6819	33.1978	33.9209
2.01667	4.46239e-05	0.000185495	5.99097e-05	6.38773e-05		Trimers (%)	4.17376	5.52656	5.7298	2.19368	2.95496	2.33955	5.51378	4.44353	4.20154	3.87101	4.45227	4.32586
2.01833	4.3394e-05	0.000176244	5.71185e-05	6.0683e-05		Crosslink (%)	41.1843	46.1014	46.0569	33.3063	36.4547	34.61	44.0659	41.9152	41.7216	38.4239	42.1024	42.5727
2.02	4.22396e-05	0.000166308	5.46006e-05	5.77606e-05		Anhydro (%)	4.56344	8.27107	5.7324	2.03263	3.87283	2.50314	7.22312	5.68998	5.59183	4.62463	5.55686	5.46207
2.02167	4.11443e-05	0.00015603	5.23503e-05	5.51111e-05		Chain length (units)	21.9133	12.0903	17.4447	49.1972	25.8209	39.9498	13.8444	17.5748	17.8832	21.6233	17.9958	18.3081
2.02333	4.00953e-05	0.000145712	5.03347e-05	5.2706e-05
2.025	3.90945e-05	0.000135593	4.85103e-05	5.05167e-05		Relative molar abundance (%)
2.02667	3.81483e-05	0.000125874	4.68443e-05	4.85254e-05		M3	9.08724	7.01368	8.56298	9.32217	9.83825	10.6121	8.34525	8.44378	8.93304	8.63686	8.66162	8.93286
2.02833	3.72623e-05	0.000116695	4.53233e-05	4.67144e-05		M4G	0.0443914	0.798327	0.243481	0.813727	0.0915047	0.598485	0.125088	0.227202	0.341657	0.323273	0.219891	0.41647
2.03	3.64316e-05	0.000108162	4.39409e-05	4.50581e-05		M3-Lpp	5.96457	8.21374	5.05693	9.01738	9.73874	7.48119	3.41302	4.68311	4.55231	6.11788	4.72857	5.30517
2.03167	3.56453e-05	0.000100332	4.2681e-05	4.3529e-05		M4	43.6591	38.7205	42.8873	46.816	43.8999	45.6506	44.8984	45.2428	44.8588	46.7366	44.5863	43.1331
2.03333	3.49136e-05	9.32238e-05	4.15285e-05	4.2119e-05		M2	3.23973	2.41328	2.78211	2.45674	2.5889	2.81498	2.85786	2.93135	2.92072	2.8461	3.08422	2.85108
2.035	3.42403e-05	8.68266e-05	4.04543e-05	4.08224e-05		M4Anh	0.994432	2.26569	0.140111	0.4614	0.342877	0.572323	1.80826	1.00003	0.873364	0.786342	1.06925	1.11453
2.03667	3.36253e-05	8.11146e-05	3.94451e-05	3.96321e-05		D44	19.5212	15.8107	19.3169	17.8568	16.7103	17.9206	19.4647	20.1601	19.8451	19.4894	19.4945	19.1987
2.03833	3.30624e-05	7.60518e-05	3.85018e-05	3.85315e-05		D45	0.400742	0.180743	0.377024	0.248842	0.0736951	0.156192	0.393426	0.141624	0.118681	0.399768	0.22257	0.252816
2.04	3.2549e-05	7.15742e-05	3.76235e-05	3.7499e-05		Other dimers	10.3488	14.8316	11.1633	9.54582	11.1327	10.1944	9.50524	9.72645	10.0912	8.0755	10.3841	11.5378
2.04167	3.20743e-05	6.75898e-05	3.67905e-05	3.65068e-05		D44Anh	1.46102	0.995234	2.02072	0.871472	1.51009	1.07317	1.67766	1.85204	1.96724	1.73568	1.79372	1.8622
2.04333	3.16409e-05	6.40219e-05	3.59877e-05	3.55481e-05		Other dimers anhydro	1.10499	3.22995	1.71934	0.396004	1.11808	0.586449	1.99733	1.14798	1.29628	0.981483	1.30291	1.06934
2.045	3.12557e-05	6.08247e-05	3.52262e-05	3.46445e-05		T444	1.84164	1.3164	1.53564	0.875174	0.845896	0.950846	1.48241	1.48278	1.45916	1.33709	1.59223	1.55798
2.04667	3.09301e-05	5.79655e-05	3.45148e-05	3.381e-05		Other trimers	1.32911	2.42995	2.34193	1.01475	1.20728	1.1175	2.29149	1.27082	1.28743	1.4128	1.46905	1.35188
2.04833	3.0668e-05	5.54021e-05	3.38552e-05	3.30395e-05		Other trimers anhydro	1.003	1.7802	1.85223	0.303758	0.901788	0.271205	1.73987	1.68992	1.45494	1.12113	1.39098	1.416
2.05	3.04567e-05	5.30957e-05	3.32464e-05	3.2332e-05
2.05167	3.0279e-05	5.10138e-05	3.2682e-05	3.16867e-05
2.05333	3.0133e-05	4.91419e-05	3.21712e-05	3.11063e-05
2.055	3.00276e-05	4.74721e-05	3.17349e-05	3.05831e-05
2.05667	2.99667e-05	4.59906e-05	3.13768e-05	3.01092e-05
2.05833	2.99242e-05	4.46778e-05	3.10725e-05	2.96934e-05
2.06	2.9869e-05	4.35057e-05	3.07888e-05	2.93328e-05
2.06167	2.98024e-05	4.24679e-05	3.05202e-05	2.90313e-05
2.06333	2.97319e-05	4.15689e-05	3.02837e-05	2.87771e-05
2.065	2.96526e-05	4.08007e-05	3.00726e-05	2.85465e-05
2.06667	2.95631e-05	4.01452e-05	2.98842e-05	2.83268e-05
2.06833	2.94673e-05	3.95952e-05	2.97146e-05	2.81169e-05
2.07	2.9367e-05	3.91498e-05	2.95628e-05	2.79189e-05
2.07167	2.92629e-05	3.88108e-05	2.94092e-05	2.77248e-05
2.07333	2.91544e-05	3.85601e-05	2.92424e-05	2.75268e-05
2.075	2.90446e-05	3.83771e-05	2.90596e-05	2.73218e-05
2.07667	2.89342e-05	3.82491e-05	2.88665e-05	2.7107e-05
2.07833	2.88263e-05	3.81643e-05	2.86648e-05	2.68873e-05
2.08	2.87286e-05	3.81156e-05	2.84556e-05	2.66676e-05
2.08167	2.8648e-05	3.80868e-05	2.82483e-05	2.6438e-05
2.08333	2.85953e-05	3.80624e-05	2.80495e-05	2.61897e-05
2.085	2.85763e-05	3.80372e-05	2.78629e-05	2.59247e-05
2.08667	2.85928e-05	3.80101e-05	2.76942e-05	2.56655e-05
2.08833	2.86524e-05	3.79677e-05	2.75462e-05	2.543e-05
2.09	2.87597e-05	3.7892e-05	2.74237e-05	2.52221e-05
2.09167	2.89126e-05	3.77622e-05	2.73267e-05	2.5029e-05
2.09333	2.91094e-05	3.75719e-05	2.72673e-05	2.48398e-05
2.095	2.93575e-05	3.73339e-05	2.72767e-05	2.46792e-05
2.09667	2.96869e-05	3.70751e-05	2.73757e-05	2.45817e-05
2.09833	3.01184e-05	3.68163e-05	2.75576e-05	2.4562e-05
2.1	3.06502e-05	3.65602e-05	2.77922e-05	2.45886e-05
2.10167	3.1269e-05	3.63033e-05	2.80805e-05	2.46418e-05
2.10333	3.19658e-05	3.60445e-05	2.84339e-05	2.47354e-05
2.105	3.27394e-05	3.58083e-05	2.88646e-05	2.49108e-05
2.10667	3.36031e-05	3.56234e-05	2.93829e-05	2.51896e-05
2.10833	3.45652e-05	3.55252e-05	3.00067e-05	2.5568e-05
2.11	3.56339e-05	3.55297e-05	3.07539e-05	2.6037e-05
2.11167	3.6799e-05	3.56478e-05	3.16133e-05	2.65937e-05
2.11333	3.8041e-05	3.59066e-05	3.25887e-05	2.72528e-05
2.115	3.9342e-05	3.63159e-05	3.36902e-05	2.80174e-05
2.11667	4.06791e-05	3.68866e-05	3.49209e-05	2.88904e-05
2.11833	4.20359e-05	3.7626e-05	3.62713e-05	2.98856e-05
2.12	4.33699e-05	3.85376e-05	3.77102e-05	3.10009e-05
2.12167	4.46448e-05	3.96142e-05	3.92227e-05	3.22256e-05
2.12333	4.58208e-05	4.08088e-05	4.08039e-05	3.35134e-05
2.125	4.68794e-05	4.20883e-05	4.24379e-05	3.48249e-05
2.12667	4.78103e-05	4.34363e-05	4.41011e-05	3.61343e-05
2.12833	4.85973e-05	4.48446e-05	4.57389e-05	3.74359e-05
2.13	4.92186e-05	4.62855e-05	4.7307e-05	3.87276e-05
2.13167	4.96418e-05	4.77164e-05	4.87732e-05	3.99799e-05
2.13333	4.98551e-05	4.91059e-05	5.01142e-05	4.11584e-05
2.135	4.98621e-05	5.04223e-05	5.13081e-05	4.22146e-05
2.13667	4.96856e-05	5.16332e-05	5.23352e-05	4.31102e-05
2.13833	4.93455e-05	5.26963e-05	5.31833e-05	4.38275e-05
2.14	4.88479e-05	5.357e-05	5.38392e-05	4.43605e-05
2.14167	4.82025e-05	5.423e-05	5.42896e-05	4.47084e-05
2.14333	4.74378e-05	5.46637e-05	5.45167e-05	4.4869e-05
2.145	4.65811e-05	5.4862e-05	5.45271e-05	4.48493e-05
2.14667	4.56533e-05	5.48242e-05	5.43311e-05	4.46522e-05
2.14833	4.46576e-05	5.45563e-05	5.39362e-05	4.4267e-05
2.15	4.3613e-05	5.40758e-05	5.3352e-05	4.36935e-05
2.15167	4.25766e-05	5.34185e-05	5.2617e-05	4.29673e-05
2.15333	4.15923e-05	5.26142e-05	5.1768e-05	4.21377e-05
2.155	4.06652e-05	5.16801e-05	5.08134e-05	4.12293e-05
2.15667	3.97729e-05	5.06369e-05	4.97391e-05	4.02509e-05
2.15833	3.89098e-05	4.95152e-05	4.8564e-05	3.92015e-05
2.16	3.80892e-05	4.83512e-05	4.73267e-05	3.80941e-05
2.16167	3.73271e-05	4.71727e-05	4.60527e-05	3.6959e-05
2.16333	3.66214e-05	4.59852e-05	4.47787e-05	3.58259e-05
2.165	3.59721e-05	4.47923e-05	4.35386e-05	3.47322e-05
2.16667	3.53743e-05	4.36004e-05	4.23409e-05	3.36859e-05
2.16833	3.48343e-05	4.24418e-05	4.11648e-05	3.26848e-05
2.17	3.43589e-05	4.13435e-05	4.00058e-05	3.17369e-05
2.17167	3.39414e-05	4.03138e-05	3.88778e-05	3.08511e-05
2.17333	3.35688e-05	3.9341e-05	3.78129e-05	3.00255e-05
2.175	3.32287e-05	3.84078e-05	3.68169e-05	2.92303e-05
2.17667	3.29228e-05	3.75277e-05	3.58868e-05	2.84657e-05
2.17833	3.26537e-05	3.67099e-05	3.50114e-05	2.77425e-05
2.18	3.24259e-05	3.59616e-05	3.4184e-05	2.70952e-05
2.18167	3.22304e-05	3.5279e-05	3.3416e-05	2.65395e-05
2.18333	3.20515e-05	3.46442e-05	3.27102e-05	2.60567e-05
2.185	3.18814e-05	3.40663e-05	3.20619e-05	2.56163e-05
2.18667	3.17342e-05	3.35605e-05	3.14673e-05	2.52152e-05
2.18833	3.16263e-05	3.31394e-05	3.09349e-05	2.48635e-05
2.19	3.15533e-05	3.27922e-05	3.04609e-05	2.4558e-05
2.19167	3.15114e-05	3.2501e-05	3.0034e-05	2.42743e-05
2.19333	3.14924e-05	3.2263e-05	2.96401e-05	2.39885e-05
2.195	3.14867e-05	3.20817e-05	2.92726e-05	2.37018e-05
2.19667	3.1493e-05	3.1979e-05	2.89456e-05	2.34319e-05
2.19833	3.15051e-05	3.19348e-05	2.8645e-05	2.31914e-05
2.2	3.15266e-05	3.19303e-05	2.83538e-05	2.29855e-05
2.20167	3.1552e-05	3.19456e-05	2.80777e-05	2.28101e-05
2.20333	3.15818e-05	3.19808e-05	2.78223e-05	2.26633e-05
2.205	3.1625e-05	3.20484e-05	2.75952e-05	2.25303e-05
2.20667	3.16796e-05	3.2144e-05	2.73955e-05	2.23845e-05
2.20833	3.17545e-05	3.22639e-05	2.72211e-05	2.22278e-05
2.21	3.18528e-05	3.23892e-05	2.70657e-05	2.20702e-05
2.21167	3.19677e-05	3.2519e-05	2.69111e-05	2.19411e-05
2.21333	3.20819e-05	3.26453e-05	2.67735e-05	2.18544e-05
2.215	3.21866e-05	3.27526e-05	2.66567e-05	2.17874e-05
2.21667	3.2292e-05	3.28301e-05	2.6554e-05	2.17145e-05
2.21833	3.2424e-05	3.28779e-05	2.64579e-05	2.16317e-05
2.22	3.25947e-05	3.2905e-05	2.63627e-05	2.15499e-05
2.22167	3.28117e-05	3.29095e-05	2.62807e-05	2.14918e-05
2.22333	3.30764e-05	3.28914e-05	2.62081e-05	2.14652e-05
2.225	3.33854e-05	3.28283e-05	2.6128e-05	2.14494e-05
2.22667	3.37548e-05	3.27111e-05	2.60366e-05	2.14189e-05
2.22833	3.42073e-05	3.25533e-05	2.59405e-05	2.13657e-05
2.23	3.47816e-05	3.23748e-05	2.5868e-05	2.13085e-05
2.23167	3.55139e-05	3.21755e-05	2.58114e-05	2.12672e-05
2.23333	3.6424e-05	3.19212e-05	2.57426e-05	2.12297e-05
2.235	3.75339e-05	3.16066e-05	2.56654e-05	2.11913e-05
2.23667	3.88825e-05	3.12666e-05	2.56003e-05	2.11795e-05
2.23833	4.05154e-05	3.09601e-05	2.55909e-05	2.12297e-05
2.24	4.24795e-05	3.07013e-05	2.56343e-05	2.13302e-05
2.24167	4.48314e-05	3.04759e-05	2.57068e-05	2.14465e-05
2.24333	4.7618e-05	3.02406e-05	2.57747e-05	2.1546e-05
2.245	5.08914e-05	2.99692e-05	2.58255e-05	2.16544e-05
2.24667	5.47131e-05	2.96626e-05	2.58708e-05	2.17904e-05
2.24833	5.91637e-05	2.93353e-05	2.59245e-05	2.19628e-05
2.25	6.43371e-05	2.90188e-05	2.59952e-05	2.21638e-05
2.25167	7.03451e-05	2.87393e-05	2.6112e-05	2.24091e-05
2.25333	7.73113e-05	2.85076e-05	2.62977e-05	2.27471e-05
2.255	8.53728e-05	2.83255e-05	2.65615e-05	2.32161e-05
2.25667	9.46656e-05	2.81595e-05	2.68998e-05	2.38151e-05
2.25833	0.000105345	2.79828e-05	2.73276e-05	2.45255e-05
2.26	0.000117599	2.78322e-05	2.78864e-05	2.5365e-05
2.26167	0.000131588	2.77475e-05	2.85819e-05	2.63621e-05
2.26333	0.00014746	2.77313e-05	2.93998e-05	2.75612e-05
2.265	0.000165409	2.77601e-05	3.03403e-05	2.89919e-05
2.26667	0.000185655	2.78331e-05	3.14371e-05	3.06856e-05
2.26833	0.000208388	2.79783e-05	3.27338e-05	3.2668e-05
2.27	0.000233737	2.82254e-05	3.42783e-05	3.49815e-05
2.27167	0.000261841	2.85987e-05	3.61243e-05	3.7697e-05
2.27333	0.000292862	2.91189e-05	3.8335e-05	4.09022e-05
2.275	0.000326931	2.98177e-05	4.09584e-05	4.46975e-05
2.27667	0.000364098	3.07202e-05	4.40333e-05	4.91481e-05
2.27833	0.000404343	3.18617e-05	4.76123e-05	5.43072e-05
2.28	0.000447599	3.32827e-05	5.17623e-05	6.02307e-05
2.28167	0.000493746	3.50112e-05	5.65757e-05	6.70263e-05
2.28333	0.000542593	3.70868e-05	6.2143e-05	7.4823e-05
2.285	0.000593855	3.95637e-05	6.85754e-05	8.37656e-05
2.28667	0.000647148	4.25148e-05	7.5984e-05	9.39841e-05
2.28833	0.000702004	4.60267e-05	8.4465e-05	0.000105598
2.29	0.000757863	5.01906e-05	9.41003e-05	0.000118742
2.29167	0.000814089	5.51217e-05	0.000104995	0.000133544
2.29333	0.000869984	6.09193e-05	0.000117276	0.000150141
2.295	0.000924809	6.77007e-05	0.000131108	0.000168678
2.29667	0.00097782	7.5601e-05	0.000146648	0.000189309
2.29833	0.00102828	8.47708e-05	0.000164041	0.000212187
2.3	0.00107548	9.53697e-05	0.000183423	0.00023745
2.30167	0.00111872	0.000107561	0.000204903	0.000265191
2.30333	0.0011573	0.000121537	0.000228566	0.000295449
2.305	0.00119061	0.000137481	0.000254464	0.000328224
2.30667	0.00121817	0.00015559	0.000282657	0.000363503
2.30833	0.00123969	0.000176065	0.000313193	0.00040124
2.31	0.00125498	0.000199115	0.000346059	0.000441316
2.31167	0.00126393	0.000224914	0.000381195	0.000483533
2.31333	0.00126651	0.000253622	0.000418507	0.000527656
2.315	0.00126281	0.000285393	0.000457856	0.000573421
2.31667	0.00125303	0.000320352	0.00049902	0.00062049
2.31833	0.00123749	0.00035858	0.0005417	0.000668429
2.32	0.0012166	0.000400094	0.000585537	0.000716748
2.32167	0.00119083	0.00044488	0.000630135	0.000764926
2.32333	0.00116073	0.000492852	0.000675059	0.000812389
2.325	0.00112688	0.000543852	0.000719848	0.000858539
2.32667	0.00108982	0.000597641	0.000764003	0.000902767
2.32833	0.00105012	0.000653908	0.000806987	0.000944488
2.33	0.00100836	0.000712262	0.000848233	0.000983149
2.33167	0.000965105	0.000772237	0.000887167	0.00101822
2.33333	0.000920914	0.000833279	0.000923263	0.00104923
2.335	0.00087632	0.000894783	0.000956028	0.00107575
2.33667	0.00083184	0.000956071	0.000985043	0.00109743
2.33833	0.000787898	0.0010164	0.00100992	0.00111402
2.34	0.000744824	0.00107501	0.00103031	0.00112532
2.34167	0.000702855	0.00113113	0.00104594	0.00113126
2.34333	0.000662213	0.00118404	0.0010566	0.00113183
2.345	0.000623115	0.00123307	0.00106224	0.00112713
2.34667	0.000585732	0.00127754	0.00106291	0.00111738
2.34833	0.000550202	0.00131683	0.00105876	0.00110286
2.35	0.000516577	0.00135043	0.00104994	0.00108392
2.35167	0.000484879	0.0013779	0.00103664	0.00106097
2.35333	0.000455118	0.00139894	0.00101911	0.0010344
2.355	0.000427272	0.00141331	0.000997697	0.00100464
2.35667	0.000401288	0.00142095	0.000972842	0.000972142
2.35833	0.000377069	0.00142193	0.000945008	0.000937427
2.36	0.000354521	0.00141641	0.000914658	0.00090099
2.36167	0.000333558	0.00140457	0.00088224	0.000863301
2.36333	0.000314092	0.00138671	0.000848174	0.000824821
2.365	0.000296032	0.00136324	0.000812883	0.000785966
2.36667	0.000279271	0.00133467	0.000776773	0.000747102
2.36833	0.000263724	0.00130159	0.000740265	0.000708567
2.37	0.000249295	0.00126452	0.000703755	0.000670666
2.37167	0.00023589	0.001224	0.00066759	0.000633665
2.37333	0.000223415	0.00118061	0.000632027	0.000597796
2.375	0.000211794	0.00113497	0.000597293	0.000563251
2.37667	0.000200971	0.00108771	0.0005636	0.000530167
2.37833	0.000190898	0.00103941	0.000531141	0.000498624
2.38	0.000181529	0.000990594	0.000500035	0.000468666
2.38167	0.00017281	0.000941678	0.000470365	0.000440335
2.38333	0.000164681	0.000893086	0.000442192	0.000413668
2.385	0.000157074	0.000845225	0.000415554	0.000388672
2.38667	0.000149935	0.000798427	0.000390461	0.000365305
2.38833	0.000143233	0.000752947	0.000366888	0.000343496
2.39	0.000136946	0.000708977	0.000344809	0.000323167
2.39167	0.000131078	0.000666724	0.000324198	0.000304267
2.39333	0.000125615	0.000626372	0.000305013	0.000286719
2.395	0.000120529	0.00058804	0.000287186	0.000270433
2.39667	0.000115771	0.00055177	0.000270627	0.000255316
2.39833	0.000111296	0.000517566	0.000255251	0.000241285
2.4	0.000107089	0.000485414	0.000240977	0.000228254
2.40167	0.000103128	0.000455275	0.000227709	0.000216124
2.40333	9.94036e-05	0.000427091	0.000215373	0.000204816
2.405	9.59012e-05	0.000400807	0.000203929	0.000194297
2.40667	9.25935e-05	0.000376359	0.000193332	0.000184531
2.40833	8.94534e-05	0.000353657	0.000183501	0.00017546
2.41	8.64676e-05	0.000332603	0.000174354	0.000167011
2.41167	8.36454e-05	0.000313088	0.000165825	0.000159118
2.41333	8.09845e-05	0.000295014	0.000157867	0.000151734
2.415	7.84701e-05	0.000278292	0.000150438	0.000144834
2.41667	7.6075e-05	0.000262841	0.000143495	0.000138391
2.41833	7.37803e-05	0.000248568	0.000137012	0.000132359
2.42	7.15864e-05	0.000235392	0.000130966	0.00012671
2.42167	6.94985e-05	0.000223223	0.000125317	0.000121404
2.42333	6.75273e-05	0.000211991	0.000120033	0.000116418
2.425	6.56685e-05	0.000201635	0.000115078	0.000111714
2.42667	6.39094e-05	0.00019212	0.000110431	0.00010727
2.42833	6.22359e-05	0.000183401	0.000106078	0.000103085
2.43	6.06379e-05	0.000175407	0.000102006	9.91628e-05
2.43167	5.91275e-05	0.000168076	9.81919e-05	9.54965e-05
2.43333	5.77244e-05	0.000161373	9.4611e-05	9.20519e-05
2.435	5.6438e-05	0.000155274	9.12384e-05	8.88063e-05
2.43667	5.52576e-05	0.000149739	8.80581e-05	8.57233e-05
2.43833	5.41743e-05	0.000144732	8.50671e-05	8.27941e-05
2.44	5.32002e-05	0.000140228	8.22684e-05	8.00293e-05
2.44167	5.23263e-05	0.000136204	7.96393e-05	7.74213e-05
2.44333	5.15413e-05	0.000132637	7.71638e-05	7.49649e-05
2.445	5.08527e-05	0.000129503	7.48192e-05	7.26238e-05
2.44667	5.02777e-05	0.000126781	7.25878e-05	7.03685e-05
2.44833	4.98291e-05	0.000124443	7.04506e-05	6.8186e-05
2.45	4.94953e-05	0.000122455	6.83945e-05	6.60785e-05
2.45167	4.92573e-05	0.000120782	6.64146e-05	6.40606e-05
2.45333	4.9105e-05	0.000119407	6.45083e-05	6.21383e-05
2.455	4.90333e-05	0.000118311	6.26736e-05	6.02968e-05
2.45667	4.9058e-05	0.000117481	6.09189e-05	5.85262e-05
2.45833	4.91792e-05	0.000116891	5.9235e-05	5.68098e-05
2.46	4.93817e-05	0.00011651	5.76123e-05	5.51466e-05
2.46167	4.96577e-05	0.000116324	5.60405e-05	5.35435e-05
2.46333	5.00176e-05	0.000116322	5.45308e-05	5.20055e-05
2.465	5.04713e-05	0.000116498	5.30901e-05	5.05462e-05
2.46667	5.10012e-05	0.000116823	5.17086e-05	4.91658e-05
2.46833	5.15863e-05	0.000117278	5.03837e-05	4.78682e-05
2.47	5.22133e-05	0.00011785	4.91087e-05	4.66445e-05
2.47167	5.28645e-05	0.00011853	4.7895e-05	4.54936e-05
2.47333	5.35232e-05	0.000119314	4.67425e-05	4.44098e-05
2.475	5.41686e-05	0.000120187	4.56503e-05	4.33871e-05
2.47667	5.47823e-05	0.000121143	4.46175e-05	4.24156e-05
2.47833	5.53566e-05	0.000122198	4.36441e-05	4.1515e-05
2.48	5.58979e-05	0.000123371	4.27517e-05	4.07179e-05
2.48167	5.6398e-05	0.000124645	4.19432e-05	4.00213e-05
2.48333	5.68346e-05	0.000125993	4.12327e-05	3.94085e-05
2.485	5.71824e-05	0.00012737	4.06079e-05	3.88458e-05
2.48667	5.7442e-05	0.000128727	4.00491e-05	3.83424e-05
2.48833	5.76165e-05	0.000130003	3.9545e-05	3.79049e-05
2.49	5.77098e-05	0.000131161	3.90954e-05	3.75561e-05
2.49167	5.7725e-05	0.000132184	3.87251e-05	3.73068e-05
2.49333	5.76647e-05	0.000133056	3.845e-05	3.71334e-05
2.495	5.75435e-05	0.000133764	3.82747e-05	3.70152e-05
2.49667	5.73683e-05	0.000134282	3.81691e-05	3.69344e-05
2.49833	5.71424e-05	0.000134596	3.81004e-05	3.69009e-05
2.5	5.68644e-05	0.0001347	3.80608e-05	3.69157e-05
2.50167	5.65421e-05	0.000134622	3.80787e-05	3.69797e-05
2.50333	5.61892e-05	0.00013441	3.81786e-05	3.7093e-05
2.505	5.58059e-05	0.000134098	3.83501e-05	3.72575e-05
2.50667	5.54036e-05	0.000133706	3.85744e-05	3.74694e-05
2.50833	5.49936e-05	0.000133243	3.88401e-05	3.77078e-05
2.51	5.45824e-05	0.000132725	3.9152e-05	3.79512e-05
2.51167	5.41559e-05	0.000132173	3.94988e-05	3.81896e-05
2.51333	5.37047e-05	0.000131601	3.98729e-05	3.84478e-05
2.515	5.32357e-05	0.000131017	4.02687e-05	3.87296e-05
2.51667	5.27712e-05	0.000130431	4.06824e-05	3.90271e-05
2.51833	5.23218e-05	0.000129838	4.11092e-05	3.93178e-05
2.52	5.18763e-05	0.00012923	4.15418e-05	3.95888e-05
2.52167	5.14156e-05	0.000128601	4.19743e-05	3.98302e-05
2.52333	5.09308e-05	0.000127974	4.24021e-05	4.004e-05
2.525	5.04269e-05	0.000127377	4.28243e-05	4.02253e-05
2.52667	4.99039e-05	0.000126783	4.32333e-05	4.03839e-05
2.52833	4.93582e-05	0.000126152	4.36158e-05	4.051e-05
2.53	4.87775e-05	0.000125437	4.39617e-05	4.05957e-05
2.53167	4.81575e-05	0.000124643	4.4283e-05	4.06637e-05
2.53333	4.74968e-05	0.000123775	4.45695e-05	4.07209e-05
2.535	4.68121e-05	0.000122836	4.48173e-05	4.07613e-05
2.53667	4.6121e-05	0.000121822	4.50274e-05	4.07702e-05
2.53833	4.54311e-05	0.000120731	4.52178e-05	4.07524e-05
2.54	4.47369e-05	0.000119564	4.53799e-05	4.07258e-05
2.54167	4.40109e-05	0.000118307	4.54939e-05	4.06834e-05
2.54333	4.32417e-05	0.000116952	4.55665e-05	4.06411e-05
2.545	4.24453e-05	0.000115504	4.56221e-05	4.06026e-05
2.54667	4.16425e-05	0.00011396	4.56701e-05	4.05593e-05
2.54833	4.08244e-05	0.000112296	4.56758e-05	4.04765e-05
2.55	3.99868e-05	0.000110505	4.56249e-05	4.03435e-05
2.55167	3.91427e-05	0.000108615	4.55504e-05	4.02026e-05
2.55333	3.83183e-05	0.000106685	4.54892e-05	4.00923e-05
2.555	3.75212e-05	0.000104738	4.54374e-05	4.00114e-05
2.55667	3.67464e-05	0.000102762	4.53535e-05	3.99267e-05
2.55833	3.59931e-05	0.000100744	4.51942e-05	3.98045e-05
2.56	3.52734e-05	9.86923e-05	4.49766e-05	3.96518e-05
2.56167	3.45944e-05	9.66122e-05	4.47372e-05	3.94754e-05
2.56333	3.3961e-05	9.45096e-05	4.4512e-05	3.92784e-05
2.565	3.33721e-05	9.2406e-05	4.42933e-05	3.90636e-05
2.56667	3.28289e-05	9.03231e-05	4.40559e-05	3.88173e-05
2.56833	3.2325e-05	8.82656e-05	4.3793e-05	3.85266e-05
2.57	3.1849e-05	8.62188e-05	4.34999e-05	3.81887e-05
2.57167	3.14086e-05	8.41838e-05	4.31861e-05	3.7833e-05
2.57333	3.10075e-05	8.21659e-05	4.28299e-05	3.74694e-05
2.575	3.06477e-05	8.01606e-05	4.24031e-05	3.70753e-05
2.57667	3.0331e-05	7.81752e-05	4.19055e-05	3.66486e-05
2.57833	3.00664e-05	7.62222e-05	4.1375e-05	3.62082e-05
2.58	2.98443e-05	7.43143e-05	4.08388e-05	3.57589e-05
2.58167	2.96583e-05	7.24632e-05	4.03063e-05	3.52929e-05
2.58333	2.94965e-05	7.06653e-05	3.97702e-05	3.47943e-05
2.585	2.93658e-05	6.89008e-05	3.92246e-05	3.42613e-05
2.58667	2.92782e-05	6.71579e-05	3.86676e-05	3.36947e-05
2.58833	2.92293e-05	6.54366e-05	3.80909e-05	3.31016e-05
2.59	2.92103e-05	6.37487e-05	3.7502e-05	3.25074e-05
2.59167	2.92033e-05	6.20969e-05	3.69092e-05	3.19182e-05
2.59333	2.91995e-05	6.04676e-05	3.63061e-05	3.13251e-05
2.595	2.91976e-05	5.88771e-05	3.56871e-05	3.07221e-05
2.59667	2.91931e-05	5.73317e-05	3.50434e-05	3.01191e-05
2.59833	2.91836e-05	5.58331e-05	3.4381e-05	2.95171e-05
2.6	2.91703e-05	5.43805e-05	3.37289e-05	2.8918e-05
2.60167	2.91487e-05	5.29631e-05	3.31022e-05	2.83239e-05
2.60333	2.91138e-05	5.15818e-05	3.24973e-05	2.77504e-05
2.605	2.90687e-05	5.02429e-05	3.18941e-05	2.71987e-05
2.60667	2.90161e-05	4.8949e-05	3.12873e-05	2.66636e-05
2.60833	2.89501e-05	4.76948e-05	3.06955e-05	2.61355e-05
2.61	2.88504e-05	4.64757e-05	3.01386e-05	2.56074e-05
2.61167	2.87051e-05	4.53027e-05	2.96184e-05	2.50852e-05
2.61333	2.85268e-05	4.41909e-05	2.91322e-05	2.45886e-05
2.615	2.83313e-05	4.31486e-05	2.86686e-05	2.41393e-05
2.61667	2.81206e-05	4.21649e-05	2.82144e-05	2.37422e-05
2.61833	2.78833e-05	4.12407e-05	2.77818e-05	2.33915e-05
2.62	2.76091e-05	4.03787e-05	2.737e-05	2.30673e-05
2.62167	2.73128e-05	3.95835e-05	2.69931e-05	2.27658e-05
2.62333	2.70221e-05	3.88649e-05	2.66727e-05	2.24909e-05
2.625	2.67353e-05	3.82238e-05	2.64145e-05	2.22505e-05
2.62667	2.64332e-05	3.7654e-05	2.62157e-05	2.20426e-05
2.62833	2.61025e-05	3.71553e-05	2.60526e-05	2.18672e-05
2.63	2.57586e-05	3.67198e-05	2.59236e-05	2.17273e-05
2.63167	2.54038e-05	3.63285e-05	2.58067e-05	2.16091e-05
2.63333	2.50357e-05	3.59796e-05	2.56993e-05	2.15095e-05
2.635	2.4648e-05	3.56748e-05	2.55871e-05	2.14169e-05
2.63667	2.42545e-05	3.54386e-05	2.54938e-05	2.13243e-05
2.63833	2.38719e-05	3.5279e-05	2.5443e-05	2.12425e-05
2.64	2.35101e-05	3.52024e-05	2.54486e-05	2.11942e-05
2.64167	2.31592e-05	3.51924e-05	2.54929e-05	2.11942e-05
2.64333	2.28044e-05	3.52294e-05	2.5541e-05	2.12218e-05
2.645	2.24389e-05	3.52997e-05	2.55881e-05	2.12524e-05
2.64667	2.20657e-05	3.53917e-05	2.56267e-05	2.12691e-05
2.64833	2.17002e-05	3.55098e-05	2.56757e-05	2.12809e-05
2.65	2.136e-05	3.56496e-05	2.57426e-05	2.13016e-05
2.65167	2.10548e-05	3.58011e-05	2.5819e-05	2.13204e-05
2.65333	2.07698e-05	3.59417e-05	2.58849e-05	2.13145e-05
2.655	2.04887e-05	3.60752e-05	2.59311e-05	2.12819e-05
2.65667	2.01949e-05	3.61987e-05	2.59556e-05	2.12415e-05
2.65833	1.9889e-05	3.63069e-05	2.59594e-05	2.11873e-05
2.66	1.95844e-05	3.6388e-05	2.59339e-05	2.11115e-05
2.66167	1.9307e-05	3.64458e-05	2.58953e-05	2.101e-05
2.66333	1.9083e-05	3.65034e-05	2.58651e-05	2.09026e-05
2.665	1.89123e-05	3.65603e-05	2.58482e-05	2.08119e-05
2.66667	1.8774e-05	3.65936e-05	2.5834e-05	2.07272e-05
2.66833	1.86356e-05	3.65621e-05	2.57869e-05	2.06149e-05
2.67	1.84941e-05	3.64674e-05	2.56898e-05	2.04464e-05
2.67167	1.83659e-05	3.6333e-05	2.55353e-05	2.02444e-05
2.67333	1.82701e-05	3.61689e-05	2.53431e-05	2.00414e-05
2.675	1.82034e-05	3.59625e-05	2.5132e-05	1.98424e-05
2.67667	1.81596e-05	3.5692e-05	2.49011e-05	1.96286e-05
2.67833	1.81317e-05	3.53566e-05	2.46476e-05	1.93902e-05
2.68	1.81197e-05	3.4958e-05	2.43753e-05	1.9135e-05
2.68167	1.81298e-05	3.45243e-05	2.41058e-05	1.88749e-05
2.68333	1.81615e-05	3.40645e-05	2.38391e-05	1.86108e-05
2.685	1.82053e-05	3.35613e-05	2.35724e-05	1.8331e-05
2.68667	1.82485e-05	3.30068e-05	2.32954e-05	1.80383e-05
2.68833	1.82999e-05	3.24298e-05	2.30051e-05	1.77536e-05
2.69	1.83754e-05	3.18518e-05	2.2713e-05	1.74905e-05
2.69167	1.84915e-05	3.12729e-05	2.24181e-05	1.72363e-05
2.69333	1.86394e-05	3.06679e-05	2.21109e-05	1.69683e-05
2.695	1.8807e-05	3.00377e-05	2.17829e-05	1.66904e-05
2.69667	1.89827e-05	2.93921e-05	2.14456e-05	1.64067e-05
2.69833	1.91649e-05	2.87339e-05	2.11186e-05	1.61298e-05
2.7	1.93508e-05	2.80694e-05	2.08095e-05	1.58618e-05
2.70167	1.95349e-05	2.7404e-05	2.05249e-05	1.56106e-05
2.70333	1.97208e-05	2.67629e-05	2.02667e-05	1.5377e-05
2.705	1.99112e-05	2.6139e-05	2.00104e-05	1.51327e-05
2.70667	2.01067e-05	2.55069e-05	1.97202e-05	1.48568e-05
2.70833	2.03015e-05	2.48721e-05	1.94083e-05	1.45583e-05
2.71	2.04925e-05	2.42491e-05	1.90982e-05	1.42755e-05
2.71167	2.06892e-05	2.36729e-05	1.88203e-05	1.40508e-05
2.71333	2.08955e-05	2.31436e-05	1.85828e-05	1.38853e-05
2.715	2.11055e-05	2.26595e-05	1.83868e-05	1.37513e-05
2.71667	2.13055e-05	2.22086e-05	1.82247e-05	1.36262e-05
2.71833	2.14825e-05	2.17758e-05	1.80702e-05	1.34951e-05
2.72	2.16278e-05	2.13476e-05	1.78996e-05	1.33601e-05
2.72167	2.17427e-05	2.09265e-05	1.77149e-05	1.32153e-05
2.72333	2.18297e-05	2.05126e-05	1.7517e-05	1.30557e-05
2.725	2.18912e-05	2.01159e-05	1.73276e-05	1.28941e-05
2.72667	2.19363e-05	1.97372e-05	1.71693e-05	1.27532e-05
2.72833	2.19782e-05	1.93973e-05	1.70703e-05	1.26724e-05
2.73	2.20175e-05	1.90871e-05	1.70251e-05	1.26419e-05
2.73167	2.2034e-05	1.88022e-05	1.70016e-05	1.2631e-05
2.73333	2.20029e-05	1.8547e-05	1.69714e-05	1.26025e-05
2.735	2.19223e-05	1.83369e-05	1.69422e-05	1.25581e-05
2.73667	2.1803e-05	1.81755e-05	1.69507e-05	1.25295e-05
2.73833	2.16672e-05	1.80457e-05	1.70044e-05	1.25305e-05
2.74	2.15326e-05	1.79303e-05	1.70911e-05	1.2562e-05
2.74167	2.13968e-05	1.78176e-05	1.71561e-05	1.26054e-05
2.74333	2.12426e-05	1.7704e-05	1.71872e-05	1.26576e-05
2.745	2.10497e-05	1.75967e-05	1.72107e-05	1.27305e-05
2.74667	2.08244e-05	1.75182e-05	1.72607e-05	1.2835e-05
2.74833	2.05871e-05	1.74731e-05	1.73436e-05	1.29641e-05
2.75	2.03535e-05	1.74497e-05	1.74397e-05	1.30882e-05
2.75167	2.0127e-05	1.74344e-05	1.75575e-05	1.31946e-05
2.75333	1.98979e-05	1.74181e-05	1.76951e-05	1.32902e-05
2.755	1.96573e-05	1.73992e-05	1.78383e-05	1.33808e-05
2.75667	1.93991e-05	1.73821e-05	1.7974e-05	1.34754e-05
2.75833	1.91262e-05	1.73776e-05	1.81031e-05	1.35789e-05
2.76	1.88545e-05	1.73848e-05	1.82351e-05	1.36912e-05
2.76167	1.85912e-05	1.73875e-05	1.83632e-05	1.38124e-05
2.76333	1.83545e-05	1.73857e-05	1.84885e-05	1.39434e-05
2.765	1.81489e-05	1.74055e-05	1.86252e-05	1.40912e-05
2.76667	1.79769e-05	1.74614e-05	1.87854e-05	1.42538e-05
2.76833	1.78271e-05	1.75282e-05	1.89503e-05	1.44154e-05
2.77	1.76837e-05	1.75696e-05	1.9085e-05	1.45504e-05
2.77167	1.75479e-05	1.7575e-05	1.91736e-05	1.46479e-05
2.77333	1.74222e-05	1.75651e-05	1.92368e-05	1.47169e-05
2.775	1.73067e-05	1.75507e-05	1.92858e-05	1.47563e-05
2.77667	1.72052e-05	1.75327e-05	1.93357e-05	1.4774e-05
2.77833	1.71227e-05	1.7502e-05	1.93866e-05	1.47691e-05
2.78	1.70649e-05	1.7474e-05	1.94365e-05	1.47593e-05
2.78167	1.70319e-05	1.74623e-05	1.94818e-05	1.47632e-05
2.78333	1.70059e-05	1.74542e-05	1.95148e-05	1.47829e-05
2.785	1.69888e-05	1.74245e-05	1.95213e-05	1.48095e-05
2.78667	1.69869e-05	1.7365e-05	1.95025e-05	1.48085e-05
2.78833	1.70148e-05	1.72928e-05	1.94629e-05	1.478e-05
2.79	1.707e-05	1.72243e-05	1.94149e-05	1.47455e-05
2.79167	1.7143e-05	1.71513e-05	1.93668e-05	1.47218e-05
2.79333	1.72337e-05	1.70611e-05	1.93244e-05	1.47051e-05
2.795	1.73378e-05	1.69556e-05	1.92763e-05	1.46726e-05
2.79667	1.74571e-05	1.68465e-05	1.92085e-05	1.46164e-05
2.79833	1.75713e-05	1.67284e-05	1.9103e-05	1.45287e-05
2.8	1.76741e-05	1.65913e-05	1.89729e-05	1.44262e-05
2.80167	1.77687e-05	1.64335e-05	1.88344e-05	1.43169e-05
2.80333	1.78696e-05	1.62667e-05	1.86987e-05	1.42174e-05
2.805	1.79788e-05	1.60882e-05	1.85621e-05	1.41188e-05
2.80667	1.80867e-05	1.58944e-05	1.84132e-05	1.40075e-05
2.80833	1.81914e-05	1.56798e-05	1.82605e-05	1.38833e-05
2.81	1.82961e-05	1.54552e-05	1.81145e-05	1.37641e-05
2.81167	1.84084e-05	1.52361e-05	1.79891e-05	1.36725e-05
2.81333	1.85207e-05	1.50342e-05	1.7877e-05	1.36055e-05
2.815	1.86217e-05	1.48475e-05	1.77507e-05	1.35395e-05
2.81667	1.87181e-05	1.46771e-05	1.76037e-05	1.34528e-05
2.81833	1.88196e-05	1.45157e-05	1.74501e-05	1.33424e-05
2.82	1.89237e-05	1.43462e-05	1.73116e-05	1.32252e-05
2.82167	1.9017e-05	1.4165e-05	1.71976e-05	1.31355e-05
2.82333	1.90976e-05	1.39837e-05	1.70892e-05	1.30872e-05
2.825	1.917e-05	1.38196e-05	1.6978e-05	1.30577e-05
2.82667	1.92398e-05	1.3661e-05	1.68621e-05	1.30094e-05
2.82833	1.93077e-05	1.35041e-05	1.67584e-05	1.29306e-05
2.83	1.93686e-05	1.33409e-05	1.66802e-05	1.28537e-05
2.83167	1.94244e-05	1.31804e-05	1.66274e-05	1.28084e-05
2.83333	1.94752e-05	1.30352e-05	1.65954e-05	1.27975e-05
2.835	1.95266e-05	1.29027e-05	1.65728e-05	1.28035e-05
2.83667	1.95679e-05	1.27891e-05	1.65577e-05	1.28172e-05
2.83833	1.96002e-05	1.26917e-05	1.6553e-05	1.28448e-05
2.84	1.96301e-05	1.26096e-05	1.65549e-05	1.28783e-05
2.84167	1.96694e-05	1.2542e-05	1.65653e-05	1.29187e-05
2.84333	1.97252e-05	1.24906e-05	1.66001e-05	1.29798e-05
2.845	1.97932e-05	1.24735e-05	1.66831e-05	1.30793e-05
2.84667	1.98725e-05	1.24879e-05	1.67933e-05	1.32055e-05
2.84833	1.99575e-05	1.25105e-05	1.68903e-05	1.33375e-05
2.85	2.0054e-05	1.2533e-05	1.69658e-05	1.34705e-05
2.85167	2.01485e-05	1.25465e-05	1.70345e-05	1.36075e-05
2.85333	2.02405e-05	1.25637e-05	1.71269e-05	1.37493e-05
2.855	2.03383e-05	1.25844e-05	1.72315e-05	1.38834e-05
2.85667	2.04652e-05	1.26178e-05	1.73361e-05	1.40154e-05
2.85833	2.06296e-05	1.26655e-05	1.74379e-05	1.41642e-05
2.86	2.08124e-05	1.27296e-05	1.75537e-05	1.43326e-05
2.86167	2.10186e-05	1.28251e-05	1.7713e-05	1.45119e-05
2.86333	2.12623e-05	1.29432e-05	1.78977e-05	1.46854e-05
2.865	2.15714e-05	1.3074e-05	1.80853e-05	1.48489e-05
2.86667	2.19572e-05	1.32083e-05	1.8253e-05	1.50233e-05
2.86833	2.24122e-05	1.33418e-05	1.84141e-05	1.52184e-05
2.87	2.29377e-05	1.34743e-05	1.85828e-05	1.54263e-05
2.87167	2.35476e-05	1.36096e-05	1.87618e-05	1.56125e-05
2.87333	2.42767e-05	1.3743e-05	1.89315e-05	1.57623e-05
2.875	2.51633e-05	1.38656e-05	1.90785e-05	1.58825e-05
2.87667	2.6246e-05	1.39811e-05	1.92047e-05	1.59919e-05
2.87833	2.75526e-05	1.40901e-05	1.93187e-05	1.60953e-05
2.88	2.91151e-05	1.41939e-05	1.94233e-05	1.61949e-05
2.88167	3.09644e-05	1.42849e-05	1.95223e-05	1.62845e-05
2.88333	3.31265e-05	1.43679e-05	1.96128e-05	1.63545e-05
2.885	3.56339e-05	1.4458e-05	1.96985e-05	1.64155e-05
2.88667	3.85163e-05	1.45509e-05	1.97842e-05	1.64697e-05
2.88833	4.18062e-05	1.46393e-05	1.98662e-05	1.65269e-05
2.89	4.55219e-05	1.47132e-05	1.99388e-05	1.65811e-05
2.89167	4.96602e-05	1.47637e-05	1.99859e-05	1.66156e-05
2.89333	5.42225e-05	1.47844e-05	2.00104e-05	1.66353e-05
2.895	5.92068e-05	1.47754e-05	2.00132e-05	1.6651e-05
2.89667	6.46049e-05	1.47456e-05	1.99944e-05	1.6656e-05
2.89833	7.04155e-05	1.47078e-05	1.99633e-05	1.66323e-05
2.9	7.66189e-05	1.46753e-05	1.99237e-05	1.65781e-05
2.90167	8.31885e-05	1.46437e-05	1.98813e-05	1.65131e-05
2.90333	9.00887e-05	1.46086e-05	1.98267e-05	1.64579e-05
2.905	9.72929e-05	1.45698e-05	1.97711e-05	1.64096e-05
2.90667	0.000104773	1.45175e-05	1.97145e-05	1.63466e-05
2.90833	0.000112498	1.44445e-05	1.96533e-05	1.62648e-05
2.91	0.000120434	1.43462e-05	1.95779e-05	1.61732e-05
2.91167	0.000128552	1.4238e-05	1.94903e-05	1.60805e-05
2.91333	0.00013683	1.41307e-05	1.93988e-05	1.59702e-05
2.915	0.000145251	1.4037e-05	1.93046e-05	1.58283e-05
2.91667	0.000153798	1.39549e-05	1.91991e-05	1.56588e-05
2.91833	0.000162437	1.38656e-05	1.9069e-05	1.54874e-05
2.92	0.000171139	1.37628e-05	1.89135e-05	1.53327e-05
2.92167	0.000179884	1.36655e-05	1.8743e-05	1.51948e-05
2.92333	0.000188658	1.35942e-05	1.85809e-05	1.50637e-05
2.925	0.000197429	1.35419e-05	1.84414e-05	1.49258e-05
2.92667	0.000206147	1.3505e-05	1.83189e-05	1.47711e-05
2.92833	0.000214757	1.34788e-05	1.81983e-05	1.46026e-05
2.93	0.000223186	1.34725e-05	1.80607e-05	1.44341e-05
2.93167	0.000231351	1.34734e-05	1.79053e-05	1.42824e-05
2.93333	0.000239166	1.34563e-05	1.77385e-05	1.41385e-05
2.935	0.00024654	1.34175e-05	1.75622e-05	1.397e-05
2.93667	0.000253391	1.33914e-05	1.73841e-05	1.3773e-05
2.93833	0.000259644	1.34319e-05	1.72098e-05	1.35661e-05
2.94	0.00026524	1.35482e-05	1.70637e-05	1.33897e-05
2.94167	0.000270136	1.37097e-05	1.69478e-05	1.32488e-05
2.94333	0.000274302	1.38665e-05	1.68527e-05	1.31197e-05
2.945	0.000277739	1.40036e-05	1.67547e-05	1.29907e-05
2.94667	0.000280462	1.4137e-05	1.66369e-05	1.28429e-05
2.94833	0.0002825	1.42813e-05	1.65068e-05	1.26842e-05
2.95	0.000283896	1.44382e-05	1.6357e-05	1.25197e-05
2.95167	0.000284711	1.46149e-05	1.62043e-05	1.23709e-05
2.95333	0.000285009	1.4816e-05	1.6046e-05	1.22359e-05
2.955	0.000284846	1.50693e-05	1.59037e-05	1.21167e-05
2.95667	0.000284276	1.53984e-05	1.5802e-05	1.2028e-05
2.95833	0.000283353	1.57925e-05	1.5736e-05	1.19709e-05
2.96	0.000282133	1.62171e-05	1.56794e-05	1.19206e-05
2.96167	0.000280659	1.66382e-05	1.56041e-05	1.18448e-05
2.96333	0.000278965	1.70809e-05	1.55127e-05	1.17423e-05
2.965	0.000277076	1.75651e-05	1.54119e-05	1.16339e-05
2.96667	0.000275033	1.81016e-05	1.5311e-05	1.15393e-05
2.96833	0.000272886	1.86895e-05	1.52158e-05	1.14585e-05
2.97	0.00027067	1.93369e-05	1.51442e-05	1.13905e-05
2.97167	0.000268406	2.0069e-05	1.51103e-05	1.13412e-05
2.97333	0.000266094	2.08994e-05	1.51093e-05	1.13117e-05
2.975	0.000263739	2.18462e-05	1.51272e-05	1.13019e-05
2.97667	0.000261343	2.29209e-05	1.51517e-05	1.13009e-05
2.97833	0.000258913	2.41192e-05	1.51612e-05	1.1293e-05
2.98	0.000256466	2.54591e-05	1.51564e-05	1.12959e-05
2.98167	0.000254011	2.69721e-05	1.51461e-05	1.13226e-05
2.98333	0.000251557	2.87086e-05	1.51442e-05	1.13728e-05
2.985	0.000249116	3.06986e-05	1.51678e-05	1.1428e-05
2.98667	0.000246701	3.29446e-05	1.52196e-05	1.14713e-05
2.98833	0.000244322	3.54603e-05	1.53044e-05	1.15294e-05
2.99	0.00024197	3.82653e-05	1.5409e-05	1.16132e-05
2.99167	0.000239635	4.1385e-05	1.5524e-05	1.17245e-05
2.99333	0.000237321	4.48257e-05	1.56361e-05	1.18329e-05
2.995	0.00023504	4.85937e-05	1.57511e-05	1.19315e-05
2.99667	0.000232801	5.269e-05	1.58792e-05	1.2028e-05
2.99833	0.000230607	5.71108e-05	1.60197e-05	1.21374e-05
3	0.000228447	6.18408e-05	1.616e-05	1.22566e-05
3.00167	0.00022634	6.68892e-05	1.63004e-05	1.23867e-05
3.00333	0.000224304	7.22558e-05	1.64522e-05	1.25325e-05
3.005	0.000222357	7.79318e-05	1.66228e-05	1.2703e-05
3.00667	0.000220494	8.38917e-05	1.68046e-05	1.28892e-05
3.00833	0.000218699	9.01023e-05	1.6994e-05	1.30833e-05
3.01	0.000216987	9.65626e-05	1.72192e-05	1.32951e-05
3.01167	0.000215367	0.000103257	1.74944e-05	1.35424e-05
3.01333	0.000213866	0.000110169	1.78242e-05	1.3838e-05
3.015	0.000212492	0.000117257	1.81908e-05	1.41789e-05
3.01667	0.000211253	0.000124495	1.85913e-05	1.45593e-05
3.01833	0.000210171	0.000131871	1.9052e-05	1.49947e-05
3.02	0.000209253	0.000139362	1.95958e-05	1.5515e-05
3.02167	0.0002085	0.000146939	2.02187e-05	1.61229e-05
3.02333	0.000207902	0.00015458	2.09066e-05	1.68136e-05
3.025	0.000207459	0.000162276	2.16764e-05	1.75782e-05
3.02667	0.000207193	0.000170005	2.25547e-05	1.84304e-05
3.02833	0.000207125	0.000177731	2.35508e-05	1.93931e-05
3.03	0.000207268	0.000185439	2.46618e-05	2.05006e-05
3.03167	0.000207621	0.000193136	2.59e-05	2.17805e-05
3.03333	0.000208184	0.000200824	2.73012e-05	2.32427e-05
3.035	0.000208949	0.000208476	2.88928e-05	2.48803e-05
3.03667	0.0002099	0.00021605	3.06814e-05	2.66942e-05
3.03833	0.000211012	0.000223498	3.26546e-05	2.86865e-05
3.04	0.000212274	0.000230783	3.48229e-05	3.08768e-05
3.04167	0.000213697	0.000237864	3.71986e-05	3.32779e-05
3.04333	0.000215288	0.000244705	3.97871e-05	3.58939e-05
3.045	0.000217033	0.000251243	4.25566e-05	3.87177e-05
3.04667	0.000218886	0.00025742	4.54996e-05	4.17476e-05
3.04833	0.000220808	0.000263187	4.86422e-05	4.49941e-05
3.05	0.000222776	0.000268513	5.20205e-05	4.84623e-05
3.05167	0.000224758	0.000273355	5.56315e-05	5.21444e-05
3.05333	0.00022673	0.000277673	5.94678e-05	5.60413e-05
3.055	0.000228664	0.000281473	6.35377e-05	6.01618e-05
3.05667	0.000230538	0.000284786	6.78413e-05	6.44961e-05
3.05833	0.000232323	0.000287651	7.23296e-05	6.90226e-05
3.06	0.000233982	0.000290095	7.69593e-05	7.37274e-05
3.06167	0.000235474	0.000292145	8.17369e-05	7.86125e-05
3.06333	0.000236728	0.000293841	8.6703e-05	8.3666e-05
3.065	0.000237706	0.000295242	9.18566e-05	8.88399e-05
3.06667	0.000238388	0.000296419	9.71761e-05	9.41201e-05
3.06833	0.000238772	0.000297448	0.000102633	9.95067e-05
3.07	0.000238847	0.000298418	0.000108216	0.000105023
3.07167	0.000238588	0.0002994	0.000113907	0.000110663
3.07333	0.00023799	0.000300484	0.000119703	0.000116415
3.075	0.000237047	0.000301739	0.000125607	0.00012226
3.07667	0.000235752	0.000303232	0.000131617	0.000128185
3.07833	0.000234099	0.000305013	0.000137707	0.000134178
3.08	0.00023211	0.000307146	0.000143852	0.000140223
3.08167	0.000229822	0.000309713	0.000150071	0.000146325
3.08333	0.000227269	0.000312778	0.000156387	0.000152481
3.085	0.000224469	0.000316416	0.000162793	0.00015869
3.08667	0.000221448	0.00032067	0.000169246	0.000164915
3.08833	0.000218226	0.000325604	0.000175702	0.000171106
3.09	0.000214825	0.000331273	0.000182138	0.000177246
3.09167	0.000211252	0.000337731	0.00018853	0.000183327
3.09333	0.000207519	0.000345008	0.000194868	0.000189354
3.095	0.000203663	0.000353118	0.000201139	0.000195318
3.09667	0.000199724	0.000362079	0.000207319	0.000201184
3.09833	0.00019574	0.000371916	0.000213391	0.000206939
3.1	0.000191723	0.00038263	0.000219316	0.000212549
3.10167	0.000187686	0.00039421	0.00022511	0.00021802
3.10333	0.000183642	0.000406618	0.000230762	0.000223341
3.105	0.000179606	0.000419788	0.00023625	0.000228481
3.10667	0.000175595	0.000433663	0.000241559	0.000233426
3.10833	0.000171637	0.000448183	0.000246679	0.000238166
3.11	0.00016775	0.000463284	0.000251618	0.000242729
3.11167	0.000163964	0.000478868	0.000256364	0.000247112
3.11333	0.00016029	0.000494829	0.000260926	0.000251307
3.115	0.000156733	0.000511049	0.000265323	0.000255303
3.11667	0.000153282	0.000527378	0.000269548	0.000259075
3.11833	0.000149926	0.000543667	0.00027357	0.000262609
3.12	0.000146669	0.000559776	0.000277355	0.000265876
3.12167	0.000143517	0.000575564	0.000280863	0.000268848
3.12333	0.000140488	0.000590867	0.000284078	0.000271489
3.125	0.000137583	0.000605487	0.000286989	0.000273794
3.12667	0.000134782	0.000619221	0.000289576	0.000275761
3.12833	0.000132069	0.000631892	0.000291816	0.000277382
3.13	0.00012944	0.00064335	0.000293666	0.000278636
3.13167	0.000126893	0.000653473	0.000295104	0.0002795
3.13333	0.000124428	0.000662145	0.00029612	0.000279959
3.135	0.000122044	0.000669276	0.000296715	0.000280001
3.13667	0.00011974	0.000674791	0.000296897	0.000279649
3.13833	0.000117503	0.000678629	0.000296667	0.00027892
3.14	0.000115316	0.00068075	0.000296022	0.000277833
3.14167	0.00011317	0.000681133	0.000294959	0.00027637
3.14333	0.000111072	0.000679819	0.000293481	0.00027453
3.145	0.000109027	0.000676905	0.000291621	0.000272366
3.14667	0.000107041	0.000672507	0.000289435	0.000269956
3.14833	0.00010511	0.000666719	0.000286959	0.000267339
3.15	0.000103226	0.000659602	0.000284197	0.000264495
3.15167	0.000101394	0.000651246	0.00028116	0.00026141
3.15333	9.96118e-05	0.00064176	0.000277882	0.000258118
3.155	9.78786e-05	0.000631261	0.000274399	0.000254677
3.15667	9.61868e-05	0.000619857	0.000270703	0.000251118
3.15833	9.45285e-05	0.000607641	0.000266807	0.00024744
3.16	9.29128e-05	0.000594711	0.000262758	0.000243634
3.16167	9.13624e-05	0.000581143	0.000258597	0.000239708
3.16333	8.98932e-05	0.000567007	0.000254343	0.000235678
3.165	8.85009e-05	0.000552382	0.000249991	0.00023157
3.16667	8.71656e-05	0.000537366	0.000245556	0.000227419
3.16833	8.58653e-05	0.000522064	0.000241074	0.000223265
3.17	8.4591e-05	0.00050657	0.000236584	0.00021914
3.17167	8.3349e-05	0.00049098	0.000232095	0.000215037
3.17333	8.21623e-05	0.000475382	0.000227594	0.000210937
3.175	8.1046e-05	0.000459853	0.000223106	0.000206839
3.17667	7.99925e-05	0.000444469	0.000218673	0.000202768
3.17833	7.89911e-05	0.000429312	0.000214338	0.000198766
3.18	7.80392e-05	0.000414464	0.000210115	0.000194862
3.18167	7.71418e-05	0.000400008	0.000206006	0.000191064
3.18333	7.6294e-05	0.000385987	0.000202009	0.000187375
3.185	7.54747e-05	0.000372405	0.00019808	0.000183762
3.18667	7.46751e-05	0.000359268	0.000194197	0.000180221
3.18833	7.38964e-05	0.000346626	0.000190382	0.000176769
3.19	7.31596e-05	0.000334537	0.000186694	0.000173437
3.19167	7.24774e-05	0.000323031	0.000183184	0.000170247
3.19333	7.18402e-05	0.000312068	0.000179835	0.000167161
3.195	7.12411e-05	0.000301612	0.000176608	0.000164167
3.19667	7.06662e-05	0.00029164	0.000173463	0.000161239
3.19833	7.01134e-05	0.000282137	0.000170372	0.000158381
3.2	6.9579e-05	0.000273113	0.000167369	0.000155606
3.20167	6.90542e-05	0.000264539	0.000164476	0.000152907
3.20333	6.85402e-05	0.000256385	0.000161691	0.000150275
3.205	6.80376e-05	0.0002486	0.000158982	0.000147691
3.20667	6.7547e-05	0.000241156	0.000156334	0.000145167
3.20833	6.70564e-05	0.000234054	0.000153747	0.000142708
3.21	6.65615e-05	0.000227293	0.000151219	0.000140324
3.21167	6.60626e-05	0.000220857	0.000148734	0.000138011
3.21333	6.55587e-05	0.00021471	0.000146279	0.000135757
3.215	6.50517e-05	0.000208817	0.00014386	0.000133539
3.21667	6.45421e-05	0.000203159	0.00014149	0.000131326
3.21833	6.4028e-05	0.000197728	0.000139189	0.000129133
3.22	6.35007e-05	0.000192519	0.000136954	0.000126985
3.22167	6.29581e-05	0.000187531	0.000134791	0.000124914
3.22333	6.24199e-05	0.000182756	0.000132694	0.000122913
3.225	6.18843e-05	0.00017818	0.000130657	0.000120959
3.22667	6.13334e-05	0.000173799	0.00012866	0.000119048
3.22833	6.07515e-05	0.000169602	0.00012669	0.000117179
3.23	6.01404e-05	0.000165591	0.000124749	0.00011536
3.23167	5.95051e-05	0.000161738	0.000122841	0.000113586
3.23333	5.88495e-05	0.000158027	0.000120981	0.000111851
3.235	5.81819e-05	0.000154453	0.000119182	0.000110152
3.23667	5.75168e-05	0.00015103	0.00011746	0.0001085
3.23833	5.68607e-05	0.000147771	0.000115797	0.000106911
3.24	5.61956e-05	0.00014465	0.000114159	0.000105369
3.24167	5.55121e-05	0.000141643	0.000112545	0.000103861
3.24333	5.48096e-05	0.000138745	0.000110974	0.000102396
3.245	5.41039e-05	0.000135974	0.000109458	0.00010099
3.24667	5.34172e-05	0.000133337	0.000108002	9.96436e-05
3.24833	5.27451e-05	0.000130816	0.000106598	9.83303e-05
3.25	5.20737e-05	0.000128373	0.000105234	9.70336e-05
3.25167	5.13877e-05	0.000125997	0.000103902	9.57547e-05
3.25333	5.06896e-05	0.000123705	0.000102599	9.44945e-05
3.255	4.99941e-05	0.000121517	0.000101325	9.32619e-05
3.25667	4.9308e-05	0.000119434	0.000100068	9.20707e-05
3.25833	4.86341e-05	0.000117437	9.88242e-05	9.09425e-05
3.26	4.79715e-05	0.000115531	9.76369e-05	8.98872e-05
3.26167	4.73191e-05	0.000113716	9.65344e-05	8.88891e-05
3.26333	4.66807e-05	0.000111983	9.55176e-05	8.79314e-05
3.265	4.60639e-05	0.000110316	9.45432e-05	8.69993e-05
3.26667	4.5468e-05	0.000108712	9.3583e-05	8.61017e-05
3.26833	4.48885e-05	0.000107177	9.26481e-05	8.52455e-05
3.27	4.4318e-05	0.000105711	9.17436e-05	8.44149e-05
3.27167	4.37602e-05	0.000104297	9.08568e-05	8.35793e-05
3.27333	4.32113e-05	0.000102921	8.99531e-05	8.2734e-05
3.275	4.26712e-05	0.000101575	8.90391e-05	8.19103e-05
3.27667	4.21419e-05	0.000100263	8.81457e-05	8.11417e-05
3.27833	4.1626e-05	9.90097e-05	8.73061e-05	8.04294e-05
3.28	4.1131e-05	9.78222e-05	8.65202e-05	7.97357e-05
3.28167	4.06537e-05	9.6687e-05	8.57682e-05	7.90312e-05
3.28333	4.01974e-05	9.55924e-05	8.50436e-05	7.83296e-05
3.285	3.97576e-05	9.4532e-05	8.43462e-05	7.76676e-05
3.28667	3.93305e-05	9.35087e-05	8.36772e-05	7.70508e-05
3.28833	3.8918e-05	9.25232e-05	8.30213e-05	7.64527e-05
3.29	3.85182e-05	9.1562e-05	8.23542e-05	7.58399e-05
3.29167	3.81318e-05	9.06171e-05	8.16729e-05	7.52211e-05
3.29333	3.77484e-05	8.96686e-05	8.0984e-05	7.46112e-05
3.295	3.73651e-05	8.87146e-05	8.03055e-05	7.4021e-05
3.29667	3.69933e-05	8.77751e-05	7.96496e-05	7.34525e-05
3.29833	3.66391e-05	8.68671e-05	7.90192e-05	7.28918e-05
3.3	3.63028e-05	8.59907e-05	7.84105e-05	7.23302e-05
3.30167	3.59779e-05	8.51215e-05	7.78112e-05	7.17617e-05
3.30333	3.56542e-05	8.42523e-05	7.72109e-05	7.11991e-05
3.305	3.53305e-05	8.33867e-05	7.66031e-05	7.06581e-05
3.30667	3.50094e-05	8.25338e-05	7.59906e-05	7.01488e-05
3.30833	3.47016e-05	8.16763e-05	7.53696e-05	6.96433e-05
3.31	3.44078e-05	8.07927e-05	7.4742e-05	6.91073e-05
3.31167	3.41248e-05	7.98937e-05	7.41106e-05	6.85398e-05
3.31333	3.38506e-05	7.89957e-05	7.34859e-05	6.79732e-05
3.315	3.35733e-05	7.81067e-05	7.28639e-05	6.74254e-05
3.31667	3.32947e-05	7.72194e-05	7.22288e-05	6.68766e-05
3.31833	3.3018e-05	7.63295e-05	7.15682e-05	6.6309e-05
3.32	3.27546e-05	7.54396e-05	7.08869e-05	6.57149e-05
3.32167	3.25033e-05	7.45523e-05	7.02066e-05	6.51129e-05
3.32333	3.22691e-05	7.36759e-05	6.95328e-05	6.45148e-05
3.325	3.20667e-05	7.28121e-05	6.88562e-05	6.39207e-05
3.32667	3.19017e-05	7.1952e-05	6.81692e-05	6.33216e-05
3.32833	3.17545e-05	7.10765e-05	6.74616e-05	6.2694e-05
3.33	3.15926e-05	7.01766e-05	6.67359e-05	6.20427e-05
3.33167	3.14137e-05	6.9256e-05	6.60028e-05	6.13796e-05
3.33333	3.12385e-05	6.83201e-05	6.5265e-05	6.07037e-05
3.335	3.11065e-05	6.73914e-05	6.4545e-05	6.00278e-05
3.33667	3.10145e-05	6.64762e-05	6.3826e-05	5.93676e-05
3.33833	3.09364e-05	6.55854e-05	6.31033e-05	5.87252e-05
3.34	3.08615e-05	6.47126e-05	6.23673e-05	5.80838e-05
3.34167	3.07899e-05	6.38425e-05	6.16229e-05	5.74335e-05
3.34333	3.07283e-05	6.29679e-05	6.08812e-05	5.67792e-05
3.345	3.06692e-05	6.2087e-05	6.01443e-05	5.6124e-05
3.34667	3.06312e-05	6.12214e-05	5.9415e-05	5.54491e-05
3.34833	3.06286e-05	6.03846e-05	5.86818e-05	5.47466e-05
3.35	3.06579e-05	5.95804e-05	5.79393e-05	5.4053e-05
3.35167	3.07099e-05	5.87969e-05	5.72005e-05	5.34007e-05
3.35333	3.07708e-05	5.80286e-05	5.64787e-05	5.27997e-05
3.355	3.08533e-05	5.72884e-05	5.57964e-05	5.22262e-05
3.35667	3.09549e-05	5.65716e-05	5.5149e-05	5.16498e-05
3.35833	3.10722e-05	5.58584e-05	5.4529e-05	5.10606e-05
3.36	3.11915e-05	5.51217e-05	5.39061e-05	5.04526e-05
3.36167	3.13109e-05	5.4367e-05	5.32766e-05	4.98546e-05
3.36333	3.14397e-05	5.36267e-05	5.26575e-05	4.9288e-05
3.365	3.15672e-05	5.29243e-05	5.20563e-05	4.87362e-05
3.36667	3.16891e-05	5.22716e-05	5.14617e-05	4.81815e-05
3.36833	3.18014e-05	5.16485e-05	5.08576e-05	4.7617e-05
3.37	3.19347e-05	5.10507e-05	5.02706e-05	4.70741e-05
3.37167	3.2101e-05	5.0471e-05	4.97259e-05	4.65755e-05
3.37333	3.22882e-05	4.98876e-05	4.92058e-05	4.61124e-05
3.375	3.2471e-05	4.92916e-05	4.86884e-05	4.56661e-05
3.37667	3.26175e-05	4.8683e-05	4.81588e-05	4.51991e-05
3.37833	3.2733e-05	4.80978e-05	4.76386e-05	4.47232e-05
3.38	3.28257e-05	4.75631e-05	4.71392e-05	4.42561e-05
3.38167	3.29044e-05	4.70744e-05	4.66633e-05	4.38216e-05
3.38333	3.29723e-05	4.66245e-05	4.62214e-05	4.34275e-05
3.385	3.30212e-05	4.61908e-05	4.58152e-05	4.30521e-05
3.38667	3.30618e-05	4.57508e-05	4.54279e-05	4.26787e-05
3.38833	3.31088e-05	4.52964e-05	4.50444e-05	4.23003e-05
3.39	3.31684e-05	4.48275e-05	4.4659e-05	4.19368e-05
3.39167	3.32198e-05	4.43523e-05	4.42717e-05	4.15909e-05
3.39333	3.32268e-05	4.38718e-05	4.38627e-05	4.12342e-05
3.395	3.31709e-05	4.33939e-05	4.34368e-05	4.08657e-05
3.39667	3.30529e-05	4.2944e-05	4.30165e-05	4.05041e-05
3.39833	3.28898e-05	4.25148e-05	4.26047e-05	4.0175e-05
3.4	3.27045e-05	4.20901e-05	4.21976e-05	3.98716e-05
3.40167	3.253e-05	4.16627e-05	4.17971e-05	3.95829e-05
3.40333	3.23815e-05	4.12443e-05	4.14287e-05	3.9308e-05
3.405	3.22361e-05	4.08611e-05	4.10998e-05	3.90459e-05
3.40667	3.20597e-05	4.0505e-05	4.08124e-05	3.87966e-05
3.40833	3.1837e-05	4.01543e-05	4.05504e-05	3.85434e-05
3.41	3.15895e-05	3.97827e-05	4.02903e-05	3.82882e-05
3.41167	3.13477e-05	3.94149e-05	4.00274e-05	3.80497e-05
3.41333	3.11186e-05	3.90786e-05	3.9757e-05	3.78477e-05
3.415	3.08869e-05	3.87783e-05	3.9479e-05	3.76733e-05
3.41667	3.06451e-05	3.84988e-05	3.92066e-05	3.75068e-05
3.41833	3.04103e-05	3.82211e-05	3.89654e-05	3.73423e-05
3.42	3.01749e-05	3.79308e-05	3.87581e-05	3.71807e-05
3.42167	2.99249e-05	3.76188e-05	3.85687e-05	3.7028e-05
3.42333	2.96609e-05	3.7296e-05	3.83859e-05	3.6889e-05
3.425	2.93937e-05	3.69741e-05	3.82002e-05	3.676e-05
3.42667	2.91271e-05	3.66793e-05	3.80221e-05	3.66486e-05
3.42833	2.88543e-05	3.64196e-05	3.7862e-05	3.65669e-05
3.43	2.85725e-05	3.61896e-05	3.77244e-05	3.65107e-05
3.43167	2.82939e-05	3.59625e-05	3.76066e-05	3.64723e-05
3.43333	2.80292e-05	3.57226e-05	3.7502e-05	3.64338e-05
3.435	2.77849e-05	3.54792e-05	3.73964e-05	3.63974e-05
3.43667	2.75495e-05	3.52492e-05	3.72928e-05	3.63747e-05
3.43833	2.73051e-05	3.50491e-05	3.72051e-05	3.63718e-05
3.44	2.70443e-05	3.4876e-05	3.71552e-05	3.64053e-05
3.44167	2.67752e-05	3.47254e-05	3.71524e-05	3.64782e-05
3.44333	2.65081e-05	3.45811e-05	3.71778e-05	3.65856e-05
3.445	2.62466e-05	3.44378e-05	3.72099e-05	3.66969e-05
3.44667	2.59908e-05	3.42953e-05	3.72249e-05	3.67875e-05
3.44833	2.57459e-05	3.41592e-05	3.72315e-05	3.68585e-05
3.45	2.55149e-05	3.40383e-05	3.72683e-05	3.69442e-05
3.45167	2.5289e-05	3.39211e-05	3.73399e-05	3.70654e-05
3.45333	2.50611e-05	3.3803e-05	3.74285e-05	3.72142e-05
3.455	2.48269e-05	3.36921e-05	3.75095e-05	3.73758e-05
3.45667	2.45972e-05	3.36028e-05	3.75811e-05	3.75541e-05
3.45833	2.4384e-05	3.3537e-05	3.76584e-05	3.77571e-05
3.46	2.41809e-05	3.34721e-05	3.77395e-05	3.79798e-05
3.46167	2.39861e-05	3.34027e-05	3.78365e-05	3.82123e-05
3.46333	2.379e-05	3.3317e-05	3.7927e-05	3.84172e-05
3.465	2.35825e-05	3.32061e-05	3.79863e-05	3.8568e-05
3.46667	2.33705e-05	3.30808e-05	3.80174e-05	3.86714e-05
3.46833	2.31623e-05	3.29509e-05	3.80353e-05	3.87572e-05
3.47	2.29688e-05	3.2831e-05	3.80674e-05	3.88646e-05
3.47167	2.27797e-05	3.27156e-05	3.80985e-05	3.90015e-05
3.47333	2.25893e-05	3.25948e-05	3.81164e-05	3.91661e-05
3.475	2.24034e-05	3.24677e-05	3.81258e-05	3.93435e-05
3.47667	2.22257e-05	3.23261e-05	3.81155e-05	3.95129e-05
3.47833	2.20524e-05	3.21647e-05	3.80844e-05	3.96341e-05
3.48	2.18791e-05	3.19709e-05	3.80156e-05	3.96834e-05
3.48167	2.17192e-05	3.17571e-05	3.79308e-05	3.96814e-05
3.48333	2.15771e-05	3.15417e-05	3.78421e-05	3.96568e-05
3.485	2.14438e-05	3.13388e-05	3.77489e-05	3.96203e-05
3.48667	2.13048e-05	3.11359e-05	3.76396e-05	3.95622e-05
3.48833	2.11468e-05	3.09015e-05	3.74869e-05	3.94715e-05
3.49	2.09761e-05	3.06147e-05	3.72881e-05	3.93523e-05
3.49167	2.08193e-05	3.02929e-05	3.706e-05	3.92252e-05
3.49333	2.07e-05	2.99746e-05	3.68273e-05	3.9104e-05
3.495	2.06137e-05	2.9668e-05	3.65992e-05	3.89729e-05
3.49667	2.05382e-05	2.93569e-05	3.63721e-05	3.88094e-05
3.49833	2.04538e-05	2.90197e-05	3.61384e-05	3.86153e-05
3.5	2.03687e-05	2.86618e-05	3.58953e-05	3.84113e-05
3.50167	2.02926e-05	2.82948e-05	3.56286e-05	3.82054e-05
3.50333	2.02342e-05	2.79296e-05	3.53403e-05	3.79887e-05
3.505	2.01879e-05	2.75681e-05	3.50425e-05	3.77679e-05
3.50667	2.01447e-05	2.72182e-05	3.47438e-05	3.75433e-05
3.50833	2.00895e-05	2.68666e-05	3.44319e-05	3.7299e-05
3.51	2.00134e-05	2.64987e-05	3.4102e-05	3.70172e-05
3.51167	1.99347e-05	2.612e-05	3.37619e-05	3.67235e-05
3.51333	1.98795e-05	2.57404e-05	3.3432e-05	3.64506e-05
3.515	1.98693e-05	2.53789e-05	3.31305e-05	3.62141e-05
3.51667	1.98877e-05	2.5029e-05	3.28563e-05	3.59865e-05
3.51833	1.99131e-05	2.46891e-05	3.26038e-05	3.575e-05
3.52	1.9929e-05	2.43591e-05	3.23455e-05	3.54998e-05
3.52167	1.9927e-05	2.40345e-05	3.20713e-05	3.52367e-05
3.52333	1.9901e-05	2.37054e-05	3.17868e-05	3.4951e-05
3.525	1.98655e-05	2.33682e-05	3.15201e-05	3.46485e-05
3.52667	1.9849e-05	2.3039e-05	3.12807e-05	3.43637e-05
3.52833	1.98452e-05	2.27081e-05	3.10413e-05	3.41105e-05
3.53	1.98439e-05	2.23719e-05	3.07756e-05	3.3877e-05
3.53167	1.98312e-05	2.20355e-05	3.04806e-05	3.36395e-05
3.53333	1.98084e-05	2.17073e-05	3.01782e-05	3.33824e-05
3.535	1.97773e-05	2.13827e-05	2.98842e-05	3.31095e-05
3.53667	1.97398e-05	2.10555e-05	2.95977e-05	3.28306e-05
3.53833	1.97049e-05	2.07399e-05	2.93178e-05	3.25656e-05
3.54	1.96688e-05	2.04495e-05	2.90408e-05	3.23163e-05
3.54167	1.9639e-05	2.01808e-05	2.8775e-05	3.2066e-05
3.54333	1.96237e-05	1.99067e-05	2.85159e-05	3.18049e-05
3.545	1.96231e-05	1.96209e-05	2.82643e-05	3.15526e-05
3.54667	1.9625e-05	1.93306e-05	2.80221e-05	3.13359e-05
3.54833	1.96129e-05	1.90484e-05	2.77941e-05	3.11457e-05
3.55	1.95767e-05	1.8776e-05	2.75773e-05	3.09536e-05
3.55167	1.95177e-05	1.85218e-05	2.73728e-05	3.07368e-05
3.55333	1.94511e-05	1.8299e-05	2.71938e-05	3.05221e-05
3.555	1.93921e-05	1.8098e-05	2.70308e-05	3.03309e-05
3.55667	1.93457e-05	1.78861e-05	2.68461e-05	3.01516e-05
3.55833	1.93076e-05	1.76454e-05	2.66218e-05	2.99584e-05
3.56	1.92721e-05	1.73938e-05	2.63834e-05	2.97624e-05
3.56167	1.92296e-05	1.71558e-05	2.61695e-05	2.95673e-05
3.56333	1.91712e-05	1.69231e-05	2.59848e-05	2.93752e-05
3.565	1.90982e-05	1.66833e-05	2.58057e-05	2.91663e-05
3.56667	1.90221e-05	1.64462e-05	2.56361e-05	2.89525e-05
3.56833	1.89555e-05	1.62442e-05	2.54741e-05	2.87554e-05
3.57	1.89066e-05	1.609e-05	2.53327e-05	2.86027e-05
3.57167	1.88673e-05	1.59692e-05	2.51989e-05	2.84933e-05
3.57333	1.88298e-05	1.58402e-05	2.50698e-05	2.84047e-05
3.575	1.87816e-05	1.56825e-05	2.49445e-05	2.8311e-05
3.57667	1.87206e-05	1.54949e-05	2.48097e-05	2.81898e-05
3.57833	1.86483e-05	1.5311e-05	2.46731e-05	2.8046e-05
3.58	1.85817e-05	1.51487e-05	2.45525e-05	2.78963e-05
3.58167	1.85518e-05	1.50215e-05	2.44884e-05	2.77898e-05
3.58333	1.85601e-05	1.49179e-05	2.44752e-05	2.77376e-05
3.585	1.85886e-05	1.48187e-05	2.44629e-05	2.7711e-05
3.58667	1.86223e-05	1.47168e-05	2.4412e-05	2.76785e-05
3.58833	1.86686e-05	1.46176e-05	2.43338e-05	2.76272e-05
3.59	1.87422e-05	1.4522e-05	2.42537e-05	2.75661e-05
3.59167	1.88406e-05	1.44183e-05	2.41718e-05	2.74952e-05
3.59333	1.89542e-05	1.4312e-05	2.40813e-05	2.74203e-05
3.595	1.90976e-05	1.42119e-05	2.39983e-05	2.73612e-05
3.59667	1.93108e-05	1.41262e-05	2.39484e-05	2.73326e-05
3.59833	1.96364e-05	1.40441e-05	2.39249e-05	2.73267e-05
3.6	2.01029e-05	1.39621e-05	2.39202e-05	2.73326e-05
3.60167	2.07273e-05	1.38692e-05	2.39032e-05	2.73267e-05
3.60333	2.15536e-05	1.37755e-05	2.38674e-05	2.73011e-05
3.605	2.26566e-05	1.36997e-05	2.38231e-05	2.72597e-05
3.60667	2.41295e-05	1.36546e-05	2.37892e-05	2.72223e-05
3.60833	2.60765e-05	1.36321e-05	2.37835e-05	2.72134e-05
3.61	2.86188e-05	1.36077e-05	2.38023e-05	2.724e-05
3.61167	3.19112e-05	1.35717e-05	2.38306e-05	2.72814e-05
3.61333	3.61625e-05	1.35149e-05	2.38429e-05	2.7306e-05
3.615	4.1638e-05	1.34437e-05	2.38325e-05	2.7306e-05
3.61667	4.86664e-05	1.33517e-05	2.37948e-05	2.72834e-05
3.61833	5.76596e-05	1.32381e-05	2.37242e-05	2.72361e-05
3.62	6.91266e-05	1.31254e-05	2.36421e-05	2.71849e-05
3.62167	8.36803e-05	1.30235e-05	2.35771e-05	2.71454e-05
3.62333	0.000102048	1.29487e-05	2.35479e-05	2.71356e-05
3.625	0.000125085	1.29027e-05	2.35508e-05	2.71533e-05
3.62667	0.00015377	1.2872e-05	2.35517e-05	2.71799e-05
3.62833	0.000189204	1.28486e-05	2.35376e-05	2.71967e-05
3.63	0.000232616	1.2826e-05	2.3514e-05	2.71878e-05
3.63167	0.000285323	1.28053e-05	2.34952e-05	2.71543e-05
3.63333	0.000348692	1.27792e-05	2.3481e-05	2.71021e-05
3.635	0.000424072	1.2725e-05	2.34565e-05	2.70439e-05
3.63667	0.000512725	1.26502e-05	2.34113e-05	2.69977e-05
3.63833	0.000615728	1.25699e-05	2.33529e-05	2.69691e-05
3.64	0.000733884	1.24897e-05	2.32841e-05	2.69385e-05
3.64167	0.000867656	1.24176e-05	2.322e-05	2.68942e-05
3.64333	0.00101711	1.23617e-05	2.31766e-05	2.68469e-05
3.645	0.00118185	1.23283e-05	2.31446e-05	2.68114e-05
3.64667	0.00136097	1.23094e-05	2.31116e-05	2.67828e-05
3.64833	0.00155302	1.2285e-05	2.30664e-05	2.67563e-05
3.65	0.001756	1.22481e-05	2.30249e-05	2.67237e-05
3.65167	0.00196747	1.22093e-05	2.3007e-05	2.66932e-05
3.65333	0.00218451	1.21831e-05	2.30033e-05	2.66656e-05
3.655	0.00240377	1.21642e-05	2.29985e-05	2.66341e-05
3.65667	0.00262154	1.21299e-05	2.29627e-05	2.65818e-05
3.65833	0.00283393	1.20813e-05	2.28987e-05	2.6506e-05
3.66	0.00303712	1.2038e-05	2.28176e-05	2.64202e-05
3.66167	0.00322751	1.20136e-05	2.27413e-05	2.63523e-05
3.66333	0.00340205	1.20091e-05	2.26999e-05	2.63188e-05
3.665	0.0035585	1.20019e-05	2.26744e-05	2.62902e-05
3.66667	0.00369579	1.19839e-05	2.26423e-05	2.62409e-05
3.66833	0.00381395	1.19695e-05	2.26056e-05	2.61769e-05
3.67	0.00391369	1.19866e-05	2.25999e-05	2.61336e-05
3.67167	0.00399592	1.20416e-05	2.26376e-05	2.61197e-05
3.67333	0.00406174	1.21246e-05	2.27055e-05	2.61198e-05
3.675	0.00411274	1.22255e-05	2.27959e-05	2.61276e-05
3.67667	0.00415092	1.23455e-05	2.29241e-05	2.61473e-05
3.67833	0.00417842	1.2496e-05	2.30947e-05	2.61838e-05
3.68	0.00419705	1.26863e-05	2.33152e-05	2.62478e-05
3.68167	0.00420824	1.29369e-05	2.36026e-05	2.63542e-05
3.68333	0.00421284	1.32633e-05	2.39918e-05	2.6506e-05
3.685	0.00421112	1.36889e-05	2.4511e-05	2.66892e-05
3.68667	0.00420323	1.42389e-05	2.51894e-05	2.69159e-05
3.68833	0.00418949	1.49494e-05	2.60621e-05	2.724e-05
3.69	0.00417041	1.58934e-05	2.71985e-05	2.77317e-05
3.69167	0.00414651	1.71521e-05	2.86817e-05	2.84332e-05
3.69333	0.00411826	1.8795e-05	3.06013e-05	2.93663e-05
3.695	0.00408606	2.09003e-05	3.30758e-05	3.05851e-05
3.69667	0.0040499	2.35729e-05	3.62534e-05	3.21734e-05
3.69833	0.0040097	2.69676e-05	4.03328e-05	3.42278e-05
3.7	0.00396534	3.1272e-05	4.55165e-05	3.68506e-05
3.70167	0.0039169	3.67334e-05	5.20563e-05	4.01681e-05
3.70333	0.00386454	4.36635e-05	6.02697e-05	4.43734e-05
3.705	0.00380844	5.24248e-05	7.05759e-05	4.97353e-05
3.70667	0.003749	6.34394e-05	8.34652e-05	5.65684e-05
3.70833	0.0036865	7.71906e-05	9.94754e-05	6.52055e-05
3.71	0.00362107	9.42634e-05	0.000119208	7.60349e-05
3.71167	0.00355279	0.000115379	0.00014339	8.95453e-05
3.71333	0.00348174	0.000141342	0.000172867	0.00010633
3.715	0.00340812	0.000173043	0.000208573	0.000127065
3.71667	0.00333214	0.000211457	0.000251494	0.00015251
3.71833	0.00325417	0.000257655	0.000302689	0.000183521
3.72	0.00317456	0.000312789	0.000363262	0.000221084
3.72167	0.00309359	0.000378033	0.000434304	0.000266282
3.72333	0.00301145	0.00045453	0.000516858	0.000320261
3.725	0.0029282	0.000543343	0.000611861	0.000384169
3.72667	0.00284399	0.000645449	0.000720145	0.000459167
3.72833	0.00275904	0.000761657	0.000842338	0.00054638
3.73	0.00267367	0.000892538	0.000978816	0.000646834
3.73167	0.0025882	0.00103837	0.00112963	0.000761376
3.73333	0.00250287	0.00119907	0.00129444	0.000890613
3.735	0.00241784	0.00137419	0.00147254	0.00103489
3.73667	0.00233332	0.00156289	0.00166287	0.00119421
3.73833	0.00224946	0.0017639	0.00186394	0.00136822
3.74	0.0021665	0.00197555	0.00207393	0.00155612
3.74167	0.00208457	0.00219584	0.00229066	0.00175668
3.74333	0.00200382	0.00242243	0.00251171	0.00196826
3.745	0.00192431	0.00265278	0.00273435	0.00218879
3.74667	0.00184612	0.00288409	0.00295571	0.00241595
3.74833	0.00176933	0.00311343	0.00317285	0.0026471
3.75	0.00169411	0.00333777	0.00338287	0.00287933
3.75167	0.00162062	0.00355405	0.00358305	0.00310964
3.75333	0.00154895	0.00375948	0.0037709	0.00333484
3.755	0.00147917	0.00395152	0.00394428	0.00355196
3.75667	0.00141128	0.00412812	0.00410151	0.00375809
3.75833	0.00134534	0.00428764	0.00424135	0.00395065
3.76	0.00128143	0.00442905	0.0043629	0.00412761
3.76167	0.00121957	0.0045519	0.00446589	0.00428733
3.76333	0.00115981	0.00465609	0.00455047	0.00442877
3.765	0.00110215	0.0047419	0.00461723	0.00455115
3.76667	0.00104658	0.0048099	0.00466693	0.00465417
3.76833	0.000993168	0.004861	0.00470047	0.00473806
3.77	0.000941949	0.00489632	0.0047188	0.00480349
3.77167	0.000892914	0.00491683	0.00472266	0.00485139
3.77333	0.000846012	0.00492355	0.00471299	0.00488273
3.775	0.00080122	0.00491755	0.00469084	0.00489861
3.77667	0.000758541	0.00490005	0.00465733	0.0049
3.77833	0.00071795	0.00487201	0.00461334	0.00488778
3.78	0.000679401	0.00483407	0.00455966	0.00486273
3.78167	0.000642847	0.00478701	0.00449717	0.00482574
3.78333	0.000608267	0.00473162	0.00442687	0.00477793
3.785	0.000575627	0.00466871	0.00434959	0.00472042
3.78667	0.000544877	0.00459879	0.00426599	0.00465431
3.78833	0.000515977	0.00452251	0.00417666	0.00458037
3.79	0.000488858	0.00444055	0.00408221	0.00449911
3.79167	0.000463432	0.00435333	0.00398328	0.00441109
3.79333	0.000439599	0.0042613	0.00388043	0.00431713
3.795	0.00041729	0.00416498	0.00377429	0.00421821
3.79667	0.000396448	0.00406498	0.00366551	0.0041151
3.79833	0.00037699	0.00396186	0.00355466	0.00400825
3.8	0.000358838	0.00385608	0.00344229	0.00389822
3.80167	0.000341918	0.00374823	0.00332882	0.00378554
3.80333	0.000326163	0.00363884	0.00321471	0.0036707
3.805	0.000311494	0.00352835	0.0031003	0.00355417
3.80667	0.000297812	0.00341705	0.00298601	0.00343642
3.80833	0.000285018	0.00330515	0.00287222	0.00331801
3.81	0.00027302	0.003193	0.00275923	0.00319934
3.81167	0.000261761	0.00308105	0.00264738	0.0030808
3.81333	0.000251209	0.00296972	0.00253689	0.00296277
3.815	0.000241326	0.00285926	0.0024281	0.00284559
3.81667	0.000232052	0.00274984	0.0023213	0.00272956
3.81833	0.000223325	0.00264167	0.00221673	0.00261501
3.82	0.000215091	0.00253503	0.00211455	0.00250229
3.82167	0.0002073	0.00243015	0.0020149	0.00239167
3.82333	0.000199892	0.00232721	0.0019179	0.00228334
3.825	0.000192823	0.00222639	0.00182367	0.00217748
3.82667	0.000186079	0.00212785	0.00173231	0.00207426
3.82833	0.000179656	0.00203179	0.00164393	0.00197387
3.83	0.000173563	0.00193829	0.00155866	0.00187642
3.83167	0.000167804	0.00184745	0.00147658	0.00178199
3.83333	0.000162372	0.00175932	0.0013977	0.00169068
3.835	0.000157228	0.00167398	0.00132195	0.00160256
3.83667	0.000152342	0.00159149	0.00124933	0.00151767
3.83833	0.000147714	0.0015119	0.00117987	0.00143606
3.84	0.000143362	0.00143526	0.00111359	0.00135779
3.84167	0.000139302	0.0013616	0.00105043	0.00128288
3.84333	0.000135521	0.00129092	0.000990329	0.0012113
3.845	0.000132017	0.0012232	0.000933222	0.001143
3.84667	0.000128785	0.0011584	0.000879038	0.0010779
3.84833	0.000125848	0.00109647	0.000827716	0.00101593
3.85	0.000123236	0.00103745	0.000779192	0.000957034
3.85167	0.000120988	0.000981343	0.000733416	0.000901174
3.85333	0.000119142	0.000928146	0.000690321	0.000848324
3.855	0.000117726	0.000877786	0.000649813	0.000798417
3.85667	0.000116778	0.000830219	0.000611809	0.000751384
3.85833	0.000116309	0.000785407	0.000576196	0.000707137
3.86	0.000116336	0.000743303	0.000542883	0.000665561
3.86167	0.000116877	0.000703858	0.000511787	0.000626565
3.86333	0.000117962	0.00066699	0.000482832	0.000590048
3.865	0.000119639	0.000632635	0.000455945	0.000555938
3.86667	0.000121948	0.000600732	0.000431018	0.00052415
3.86833	0.000124913	0.000571218	0.000407946	0.000494571
3.87	0.000128536	0.000543992	0.00038661	0.000467071
3.87167	0.000132821	0.00051893	0.000366904	0.000441539
3.87333	0.000137789	0.000495925	0.000348716	0.000417884
3.875	0.000143448	0.000474888	0.000331927	0.000396024
3.87667	0.000149794	0.000455731	0.000316433	0.000375841
3.87833	0.000156812	0.000438351	0.000302127	0.000357206
3.88	0.000164493	0.000422614	0.000288915	0.000340001
3.88167	0.000172818	0.000408369	0.000276707	0.000324121
3.88333	0.000181754	0.000395464	0.000265434	0.000309467
3.885	0.000191258	0.000383767	0.000255015	0.000295911
3.88667	0.00020128	0.00037316	0.000245347	0.000283335
3.88833	0.000211765	0.000363518	0.000236333	0.000271651
3.89	0.000222634	0.000354705	0.000227887	0.000260794
3.89167	0.000233797	0.000346581	0.000219951	0.000250693
3.89333	0.000245152	0.000339017	0.000212464	0.000241266
3.895	0.000256602	0.00033189	0.000205386	0.000232439
3.89667	0.000268045	0.000325083	0.000198678	0.000224131
3.89833	0.000279377	0.000318499	0.000192324	0.000216277
3.9	0.000290502	0.000312073	0.000186295	0.000208836
3.90167	0.000301338	0.000305777	0.000180569	0.000201797
3.90333	0.000311792	0.000299563	0.000175137	0.00019516
3.905	0.00032176	0.000293384	0.00017	0.000188917
3.90667	0.000331098	0.000287212	0.000165148	0.000183041
3.90833	0.000339685	0.000281014	0.000160544	0.000177492
3.91	0.000347418	0.000274765	0.000156158	0.000172223
3.91167	0.00035423	0.000268444	0.000151987	0.000167209
3.91333	0.000360079	0.000262085	0.000148063	0.000162468
3.915	0.00036494	0.000255732	0.000144429	0.000158021
3.91667	0.000368782	0.000249418	0.000141112	0.000153884
3.91833	0.00037156	0.000243163	0.000138117	0.000150073
3.92	0.000373225	0.000236977	0.000135451	0.000146602
3.92167	0.000373768	0.000230871	0.000133147	0.000143495
3.92333	0.000373213	0.000224874	0.00013124	0.000140793
3.925	0.000371608	0.000219019	0.000129749	0.000138538
3.92667	0.000369009	0.000213343	0.000128698	0.00013675
3.92833	0.000365436	0.000207886	0.000128115	0.000135414
3.93	0.000360902	0.000202707	0.000128038	0.000134529
3.93167	0.000355451	0.000197873	0.000128513	0.000134153
3.93333	0.00034916	0.000193422	0.000129566	0.000134356
3.935	0.000342124	0.000189371	0.000131213	0.000135172
3.93667	0.000334414	0.000185742	0.000133442	0.000136609
3.93833	0.000326105	0.000182587	0.000136261	0.00013868
3.94	0.000317279	0.000179966	0.00013971	0.000141441
3.94167	0.000308022	0.000177958	0.000143853	0.000144946
3.94333	0.000298409	0.000176613	0.000148712	0.000149221
3.945	0.000288507	0.000175961	0.00015426	0.000154229
3.94667	0.000278392	0.00017601	0.000160439	0.000159937
3.94833	0.000268126	0.00017676	0.000167196	0.000166324
3.95	0.000257774	0.000178231	0.000174508	0.000173399
3.95167	0.000247403	0.000180445	0.000182344	0.000181158
3.95333	0.000237085	0.000183432	0.000190675	0.000189565
3.955	0.000226872	0.000187182	0.000199433	0.000198551
3.95667	0.00021681	0.000191672	0.000208553	0.000208039
3.95833	0.000206936	0.000196863	0.000217959	0.000217957
3.96	0.000197294	0.00020273	0.000227576	0.000228237
3.96167	0.000187922	0.000209241	0.000237323	0.000238826
3.96333	0.000178852	0.000216342	0.000247123	0.000249627
3.965	0.000170106	0.000223966	0.000256896	0.000260529
3.96667	0.000161696	0.000232036	0.000266527	0.000271398
3.96833	0.000153631	0.000240473	0.000275858	0.000282109
3.97	0.00014591	0.000249184	0.000284758	0.000292552
3.97167	0.000138535	0.000258078	0.00029312	0.000302603
3.97333	0.00013151	0.00026707	0.000300879	0.000312159
3.975	0.000124848	0.000276068	0.00030797	0.000321113
3.97667	0.000118551	0.000284982	0.000314338	0.000329378
3.97833	0.000112618	0.000293723	0.000319958	0.000336855
3.98	0.000107048	0.000302195	0.000324773	0.000343469
3.98167	0.00010183	0.00031031	0.000328712	0.00034915
3.98333	9.69343e-05	0.000317969	0.000331696	0.000353828
3.985	9.23257e-05	0.000325081	0.000333683	0.000357465
3.98667	8.79913e-05	0.000331554	0.000334678	0.000360038
3.98833	8.3943e-05	0.000337313	0.000334697	0.000361549
3.99	8.01842e-05	0.000342296	0.00033375	0.000361987
3.99167	7.66957e-05	0.000346442	0.000331848	0.000361348
3.99333	7.34502e-05	0.000349704	0.000329018	0.000359621
3.995	7.04345e-05	0.000352042	0.000325327	0.000356844
3.99667	6.76486e-05	0.000353456	0.000320856	0.000353098
3.99833	6.50828e-05	0.000353952	0.000315638	0.000348456
4	6.27207e-05	0.000353536	0.000309709	0.000342966
4.00167	6.05472e-05	0.000352237	0.000303114	0.00033669
4.00333	5.85564e-05	0.000350084	0.000295941	0.000329721
4.005	5.67382e-05	0.000347101	0.000288281	0.000322147
4.00667	5.50742e-05	0.000343292	0.000280192	0.00031402
4.00833	5.35479e-05	0.000338686	0.000271732	0.000305361
4.01	5.21429e-05	0.000333349	0.000262969	0.000296232
4.01167	5.08552e-05	0.000327354	0.000253996	0.000286748
4.01333	4.96837e-05	0.000320781	0.0002449	0.000277041
4.015	4.86227e-05	0.000313678	0.00023573	0.000267189
4.01667	4.76548e-05	0.000306095	0.000226521	0.000257217
4.01833	4.67537e-05	0.000298081	0.0002173	0.000247146
4.02	4.59084e-05	0.00028971	0.000208115	0.000237044
4.02167	4.51113e-05	0.000281079	0.000199026	0.000227009
4.02333	4.43491e-05	0.000272244	0.000190083	0.000217083
4.025	4.36028e-05	0.000263238	0.000181324	0.000207283
4.02667	4.28685e-05	0.000254092	0.000172772	0.000197633
4.02833	4.21711e-05	0.000244882	0.000164465	0.000188201
4.03	4.15282e-05	0.000235693	0.000156448	0.000179078
4.03167	4.09209e-05	0.000226573	0.000148743	0.000170293
4.03333	4.03142e-05	0.00021756	0.00014137	0.000161831
4.035	3.97043e-05	0.000208681	0.000134335	0.000153687
4.03667	3.91046e-05	0.000199958	0.000127632	0.000145875
4.03833	3.85169e-05	0.000191404	0.000121247	0.000138412
4.04	3.79369e-05	0.000183041	0.000115175	0.00013129
4.04167	3.73499e-05	0.000174915	0.000109417	0.000124504
4.04333	3.67635e-05	0.000167084	0.000103984	0.000118072
4.045	3.61733e-05	0.000159573	9.88628e-05	0.000112002
4.04667	3.55857e-05	0.000152384	9.40532e-05	0.000106306
4.04833	3.50063e-05	0.000145504	8.95498e-05	0.000100962
4.05	3.44402e-05	0.000138927	8.53347e-05	9.59291e-05
4.05167	3.38938e-05	0.000132659	8.13986e-05	9.11869e-05
4.05333	3.33645e-05	0.000126705	7.77301e-05	8.67422e-05
4.055	3.28441e-05	0.000121058	7.43179e-05	8.2597e-05
4.05667	3.23205e-05	0.000115696	7.11347e-05	7.87337e-05
4.05833	3.17881e-05	0.000110605	6.81475e-05	7.51117e-05
4.06	3.12493e-05	0.000105776	6.53319e-05	7.17114e-05
4.06167	3.07143e-05	0.000101219	6.26886e-05	6.85457e-05
4.06333	3.01895e-05	9.69314e-05	6.02254e-05	6.56046e-05
4.065	2.97008e-05	9.2928e-05	5.79647e-05	6.28911e-05
4.06667	2.92452e-05	8.91907e-05	5.58982e-05	6.03756e-05
4.06833	2.88219e-05	8.56959e-05	5.40173e-05	5.80484e-05
4.07	2.84202e-05	8.24202e-05	5.23136e-05	5.58984e-05
4.07167	2.8035e-05	7.93473e-05	5.07597e-05	5.39278e-05
4.07333	2.76662e-05	7.64864e-05	4.93395e-05	5.21405e-05
4.075	2.73051e-05	7.38256e-05	4.80363e-05	5.05157e-05
4.07667	2.6958e-05	7.13469e-05	4.68555e-05	4.90427e-05
4.07833	2.66305e-05	6.90225e-05	4.57823e-05	4.76889e-05
4.08	2.63259e-05	6.68342e-05	4.47834e-05	4.64218e-05
4.08167	2.60403e-05	6.47766e-05	4.3842e-05	4.52247e-05
4.08333	2.57764e-05	6.28597e-05	4.29618e-05	4.41005e-05
4.085	2.55441e-05	6.10907e-05	4.21656e-05	4.30777e-05
4.08667	2.53461e-05	5.94659e-05	4.14541e-05	4.21634e-05
4.08833	2.51754e-05	5.79809e-05	4.08246e-05	4.13505e-05
4.09	2.50135e-05	5.66238e-05	4.02574e-05	4.06066e-05
4.09167	2.48536e-05	5.53841e-05	3.97268e-05	3.98932e-05
4.09333	2.47007e-05	5.42435e-05	3.92189e-05	3.92153e-05
4.095	2.45668e-05	5.31849e-05	3.87279e-05	3.85769e-05
4.09667	2.44639e-05	5.22139e-05	3.82492e-05	3.79876e-05
4.09833	2.43884e-05	5.13266e-05	3.77649e-05	3.74181e-05
4.1	2.43282e-05	5.05161e-05	3.72617e-05	3.68349e-05
4.10167	2.42793e-05	4.97767e-05	3.67416e-05	3.62477e-05
4.10333	2.42368e-05	4.90959e-05	3.6211e-05	3.56653e-05
4.105	2.42082e-05	4.84666e-05	3.56936e-05	3.51106e-05
4.10667	2.4191e-05	4.78787e-05	3.52046e-05	3.45775e-05
4.10833	2.41892e-05	4.73395e-05	3.47466e-05	3.40485e-05
4.11	2.42114e-05	4.68472e-05	3.4299e-05	3.35055e-05
4.11167	2.42558e-05	4.63802e-05	3.38391e-05	3.2937e-05
4.11333	2.43148e-05	4.59203e-05	3.33661e-05	3.23646e-05
4.115	2.43903e-05	4.54731e-05	3.28949e-05	3.18246e-05
4.11667	2.4476e-05	4.50538e-05	3.24322e-05	3.13261e-05
4.11833	2.45636e-05	4.46661e-05	3.19743e-05	3.08541e-05
4.12	2.46391e-05	4.42955e-05	3.15069e-05	3.03654e-05
4.12167	2.47108e-05	4.39304e-05	3.10357e-05	2.98521e-05
4.12333	2.47971e-05	4.35553e-05	3.05598e-05	2.932e-05
4.125	2.48993e-05	4.31712e-05	3.00821e-05	2.87889e-05
4.12667	2.50059e-05	4.27754e-05	2.96015e-05	2.82697e-05
4.12833	2.51164e-05	4.23714e-05	2.91294e-05	2.77632e-05
4.13	2.52369e-05	4.19576e-05	2.86751e-05	2.72755e-05
4.13167	2.53797e-05	4.15401e-05	2.82389e-05	2.68144e-05
4.13333	2.55403e-05	4.11208e-05	2.78176e-05	2.63661e-05
4.135	2.57065e-05	4.07034e-05	2.73992e-05	2.59128e-05
4.13667	2.5869e-05	4.02877e-05	2.69856e-05	2.54596e-05
4.13833	2.60321e-05	3.98757e-05	2.65851e-05	2.50349e-05
4.14	2.62085e-05	3.94663e-05	2.62072e-05	2.46516e-05
4.14167	2.64021e-05	3.90461e-05	2.58557e-05	2.4298e-05
4.14333	2.66096e-05	3.86052e-05	2.55249e-05	2.3958e-05
4.145	2.68139e-05	3.81417e-05	2.51979e-05	2.36131e-05
4.14667	2.69993e-05	3.7654e-05	2.48578e-05	2.32565e-05
4.14833	2.71776e-05	3.71617e-05	2.45044e-05	2.29087e-05
4.15	2.73591e-05	3.66666e-05	2.41708e-05	2.25934e-05
4.15167	2.75476e-05	3.61861e-05	2.38862e-05	2.23312e-05
4.15333	2.77215e-05	3.57388e-05	2.36563e-05	2.21263e-05
4.155	2.7868e-05	3.53322e-05	2.34641e-05	2.19608e-05
4.15667	2.79823e-05	3.49454e-05	2.32869e-05	2.18062e-05
4.15833	2.8066e-05	3.45559e-05	2.31173e-05	2.16485e-05
4.16	2.81346e-05	3.41736e-05	2.29684e-05	2.14948e-05
4.16167	2.81904e-05	3.38156e-05	2.28525e-05	2.13607e-05
4.16333	2.82228e-05	3.34766e-05	2.2762e-05	2.12455e-05
4.165	2.82158e-05	3.31475e-05	2.26734e-05	2.11529e-05
4.16667	2.81676e-05	3.28409e-05	2.25754e-05	2.10878e-05
4.16833	2.80991e-05	3.25795e-05	2.2485e-05	2.10573e-05
4.17	2.80229e-05	3.23667e-05	2.24162e-05	2.10386e-05
4.17167	2.79359e-05	3.2189e-05	2.23738e-05	2.10277e-05
4.17333	2.78287e-05	3.20249e-05	2.23531e-05	2.10248e-05
4.175	2.76941e-05	3.18689e-05	2.23436e-05	2.10307e-05
4.17667	2.7533e-05	3.17274e-05	2.23342e-05	2.10445e-05
4.17833	2.7347e-05	3.16066e-05	2.23135e-05	2.10602e-05
4.18	2.71433e-05	3.15056e-05	2.22729e-05	2.10829e-05
4.18167	2.69409e-05	3.14226e-05	2.22315e-05	2.11006e-05
4.18333	2.67517e-05	3.13622e-05	2.2206e-05	2.11095e-05
4.185	2.65785e-05	3.13234e-05	2.22079e-05	2.11036e-05
4.18667	2.64205e-05	3.12991e-05	2.22286e-05	2.11026e-05
4.18833	2.62694e-05	3.12883e-05	2.22541e-05	2.11332e-05
4.19	2.61146e-05	3.12937e-05	2.22795e-05	2.11952e-05
4.19167	2.59337e-05	3.12982e-05	2.22909e-05	2.12602e-05
4.19333	2.57275e-05	3.12928e-05	2.22805e-05	2.13056e-05
4.195	2.55237e-05	3.12892e-05	2.22588e-05	2.13519e-05
4.19667	2.53613e-05	3.13108e-05	2.22541e-05	2.14248e-05
4.19833	2.52604e-05	3.13541e-05	2.2288e-05	2.15332e-05
4.2	2.52102e-05	3.13847e-05	2.23512e-05	2.16642e-05
4.20167	2.51855e-05	3.13784e-05	2.2419e-05	2.17962e-05
4.20333	2.51677e-05	3.13289e-05	2.24925e-05	2.19184e-05
4.205	2.51563e-05	3.12549e-05	2.2583e-05	2.20327e-05
4.20667	2.51506e-05	3.11738e-05	2.2681e-05	2.215e-05
4.20833	2.51715e-05	3.10809e-05	2.27649e-05	2.228e-05
4.21	2.52331e-05	3.09826e-05	2.28289e-05	2.24131e-05
4.21167	2.5367e-05	3.08807e-05	2.28911e-05	2.25273e-05
4.21333	2.55853e-05	3.07752e-05	2.2975e-05	2.26219e-05
4.215	2.58696e-05	3.06526e-05	2.30749e-05	2.27027e-05
4.21667	2.61927e-05	3.05111e-05	2.31606e-05	2.27776e-05
4.21833	2.6536e-05	3.03758e-05	2.32247e-05	2.28426e-05
4.22	2.69149e-05	3.02667e-05	2.32935e-05	2.29018e-05
4.22167	2.73426e-05	3.01864e-05	2.33849e-05	2.2953e-05
4.22333	2.78287e-05	3.01188e-05	2.34829e-05	2.29904e-05
4.225	2.83701e-05	3.00512e-05	2.35545e-05	2.30052e-05
4.22667	2.89456e-05	2.99737e-05	2.35847e-05	2.29756e-05
4.22833	2.95346e-05	2.98997e-05	2.35809e-05	2.28988e-05
4.23	3.01229e-05	2.98321e-05	2.35564e-05	2.27766e-05
4.23167	3.072e-05	2.97717e-05	2.35093e-05	2.26131e-05
4.23333	3.13324e-05	2.9714e-05	2.34235e-05	2.24199e-05
4.235	3.19601e-05	2.96608e-05	2.32907e-05	2.22032e-05
4.23667	3.25985e-05	2.96346e-05	2.31258e-05	2.19815e-05
4.23833	3.32369e-05	2.96373e-05	2.29448e-05	2.17657e-05
4.24	3.38817e-05	2.96617e-05	2.2762e-05	2.15647e-05
4.24167	3.45309e-05	2.96978e-05	2.25962e-05	2.13765e-05
4.24333	3.51751e-05	2.97374e-05	2.24407e-05	2.11814e-05
4.245	3.5797e-05	2.97735e-05	2.22862e-05	2.09617e-05
4.24667	3.63751e-05	2.97681e-05	2.20967e-05	2.07085e-05
4.24833	3.69075e-05	2.97167e-05	2.18724e-05	2.04375e-05
4.25	3.73962e-05	2.96301e-05	2.16284e-05	2.01705e-05
4.25167	3.78557e-05	2.95382e-05	2.13862e-05	1.99351e-05
4.25333	3.82853e-05	2.94534e-05	2.11648e-05	1.9737e-05
4.255	3.86858e-05	2.93606e-05	2.09509e-05	1.95636e-05
4.25667	3.90589e-05	2.92478e-05	2.0736e-05	1.93971e-05
4.25833	3.94137e-05	2.91153e-05	2.05212e-05	1.92227e-05
4.26	3.97595e-05	2.89774e-05	2.03195e-05	1.9064e-05
4.26167	4.00965e-05	2.88502e-05	2.01527e-05	1.89625e-05
4.26333	4.04158e-05	2.87123e-05	2.00199e-05	1.89271e-05
4.265	4.07083e-05	2.85337e-05	1.99162e-05	1.89448e-05
4.26667	4.09711e-05	2.83092e-05	1.98493e-05	1.89901e-05
4.26833	4.12116e-05	2.80586e-05	1.98135e-05	1.90641e-05
4.27	4.14153e-05	2.78106e-05	1.9789e-05	1.91655e-05
4.27167	4.15847e-05	2.75726e-05	1.97692e-05	1.93035e-05
4.27333	4.1725e-05	2.73273e-05	1.97796e-05	1.94907e-05
4.275	4.18506e-05	2.70541e-05	1.98493e-05	1.97291e-05
4.27667	4.19712e-05	2.6753e-05	1.99822e-05	2.00198e-05
4.27833	4.20886e-05	2.64518e-05	2.01819e-05	2.03725e-05
4.28	4.22162e-05	2.61696e-05	2.04514e-05	2.0807e-05
4.28167	4.23418e-05	2.58973e-05	2.07775e-05	2.13174e-05
4.28333	4.24491e-05	2.56376e-05	2.1144e-05	2.18701e-05
4.285	4.2517e-05	2.53815e-05	2.15332e-05	2.24278e-05
4.28667	4.25379e-05	2.51345e-05	2.19592e-05	2.29944e-05
4.28833	4.2529e-05	2.48865e-05	2.24237e-05	2.35855e-05
4.29	4.25049e-05	2.4644e-05	2.29269e-05	2.42092e-05
4.29167	4.24681e-05	2.44231e-05	2.34669e-05	2.48566e-05
4.29333	4.23964e-05	2.42238e-05	2.4036e-05	2.54961e-05
4.295	4.22701e-05	2.40552e-05	2.46382e-05	2.61247e-05
4.29667	4.21032e-05	2.39236e-05	2.52696e-05	2.67513e-05
4.29833	4.19281e-05	2.38226e-05	2.59179e-05	2.73839e-05
4.3	4.17687e-05	2.37531e-05	2.65643e-05	2.80144e-05
4.30167	4.1619e-05	2.37144e-05	2.71938e-05	2.86165e-05
4.30333	4.14572e-05	2.3727e-05	2.78073e-05	2.91771e-05
4.305	4.12617e-05	2.37946e-05	2.84066e-05	2.96924e-05
4.30667	4.10396e-05	2.3911e-05	2.8989e-05	3.01614e-05
4.30833	4.08003e-05	2.40705e-05	2.95402e-05	3.05782e-05
4.31	4.05458e-05	2.42581e-05	3.00406e-05	3.09319e-05
4.31167	4.02793e-05	2.44637e-05	3.04807e-05	3.12206e-05
4.31333	4.00032e-05	2.46882e-05	3.0884e-05	3.14512e-05
4.315	3.97297e-05	2.49524e-05	3.12732e-05	3.16463e-05
4.31667	3.94562e-05	2.5277e-05	3.16557e-05	3.18285e-05
4.31833	3.91744e-05	2.5653e-05	3.2012e-05	3.20108e-05
4.32	3.88952e-05	2.60542e-05	3.23116e-05	3.21714e-05
4.32167	3.86376e-05	2.64653e-05	3.25463e-05	3.22966e-05
4.32333	3.8411e-05	2.68873e-05	3.27225e-05	3.23783e-05
4.325	3.82041e-05	2.73336e-05	3.28751e-05	3.24394e-05
4.32667	3.79991e-05	2.77935e-05	3.30174e-05	3.24877e-05
4.32833	3.77795e-05	2.82362e-05	3.31428e-05	3.25113e-05
4.33	3.75492e-05	2.86572e-05	3.32332e-05	3.25094e-05
4.33167	3.73372e-05	2.90765e-05	3.33039e-05	3.24907e-05
4.33333	3.71773e-05	2.95192e-05	3.33793e-05	3.2471e-05
4.335	3.70707e-05	2.99745e-05	3.34584e-05	3.24503e-05
4.33667	3.69939e-05	3.04038e-05	3.35008e-05	3.24208e-05
4.33833	3.69285e-05	3.07942e-05	3.34745e-05	3.23734e-05
4.34	3.6879e-05	3.11467e-05	3.33991e-05	3.22995e-05
4.34167	3.68612e-05	3.14731e-05	3.33124e-05	3.22e-05
4.34333	3.68847e-05	3.17643e-05	3.3237e-05	3.20768e-05
4.345	3.69399e-05	3.20042e-05	3.31541e-05	3.19389e-05
4.34667	3.70243e-05	3.21999e-05	3.30495e-05	3.1798e-05
4.34833	3.71481e-05	3.23676e-05	3.29185e-05	3.16532e-05
4.35	3.73277e-05	3.25299e-05	3.27743e-05	3.15113e-05
4.35167	3.75631e-05	3.26831e-05	3.26405e-05	3.13625e-05
4.35333	3.78493e-05	3.28229e-05	3.2534e-05	3.12078e-05
4.355	3.81825e-05	3.29338e-05	3.24313e-05	3.10344e-05
4.35667	3.85601e-05	3.30122e-05	3.22956e-05	3.08423e-05
4.35833	3.89739e-05	3.30555e-05	3.21014e-05	3.06491e-05
4.36	3.94232e-05	3.30673e-05	3.18678e-05	3.0459e-05
4.36167	3.99188e-05	3.30717e-05	3.16378e-05	3.026e-05
4.36333	4.04684e-05	3.30772e-05	3.14287e-05	3.00225e-05
4.365	4.10707e-05	3.30844e-05	3.12355e-05	2.97565e-05
4.36667	4.17224e-05	3.30709e-05	3.10291e-05	2.94885e-05
4.36833	4.24281e-05	3.30366e-05	3.08049e-05	2.9251e-05
4.37	4.31929e-05	3.2996e-05	3.05777e-05	2.90579e-05
4.37167	4.40096e-05	3.29564e-05	3.03515e-05	2.88855e-05
4.37333	4.48733e-05	3.29014e-05	3.0132e-05	2.87052e-05
4.375	4.57649e-05	3.28049e-05	2.99086e-05	2.84983e-05
4.37667	4.66826e-05	3.26795e-05	2.96976e-05	2.82766e-05
4.37833	4.76136e-05	3.25389e-05	2.94856e-05	2.8049e-05
4.38	4.85433e-05	3.24009e-05	2.92632e-05	2.78213e-05
4.38167	4.94578e-05	3.22621e-05	2.90229e-05	2.75839e-05
4.38333	5.03463e-05	3.21124e-05	2.87779e-05	2.73425e-05
4.385	5.12106e-05	3.19564e-05	2.85423e-05	2.711e-05
4.38667	5.20471e-05	3.18058e-05	2.83312e-05	2.6905e-05
4.38833	5.28556e-05	3.16778e-05	2.81474e-05	2.67218e-05
4.39	5.36311e-05	3.15624e-05	2.79778e-05	2.65513e-05
4.39167	5.43532e-05	3.14389e-05	2.78129e-05	2.64015e-05
4.39333	5.50031e-05	3.12892e-05	2.76452e-05	2.62666e-05
4.395	5.55793e-05	3.1117e-05	2.74841e-05	2.61326e-05
4.39667	5.60871e-05	3.09276e-05	2.73305e-05	2.59798e-05
4.39833	5.65167e-05	3.07292e-05	2.71928e-05	2.58153e-05
4.4	5.68365e-05	3.05255e-05	2.70657e-05	2.56567e-05
4.40167	5.70358e-05	3.03208e-05	2.69403e-05	2.55118e-05
4.40333	5.7131e-05	3.01161e-05	2.68235e-05	2.53857e-05
4.405	5.71373e-05	2.99025e-05	2.67114e-05	2.52714e-05
4.40667	5.70828e-05	2.96852e-05	2.66124e-05	2.51739e-05
4.40833	5.69958e-05	2.94805e-05	2.65455e-05	2.51118e-05
4.41	5.68778e-05	2.93164e-05	2.6537e-05	2.5093e-05
4.41167	5.66976e-05	2.91847e-05	2.65832e-05	2.51138e-05
4.41333	5.64259e-05	2.90702e-05	2.66558e-05	2.51758e-05
4.415	5.60611e-05	2.89665e-05	2.67132e-05	2.52606e-05
4.41667	5.56289e-05	2.88746e-05	2.67434e-05	2.53749e-05
4.41833	5.51421e-05	2.88079e-05	2.67641e-05	2.55247e-05
4.42	5.4597e-05	2.87501e-05	2.67933e-05	2.57128e-05
4.42167	5.39947e-05	2.86915e-05	2.68584e-05	2.59375e-05
4.42333	5.33404e-05	2.8623e-05	2.69676e-05	2.61808e-05
4.425	5.26563e-05	2.85752e-05	2.71316e-05	2.64764e-05
4.42667	5.19487e-05	2.85689e-05	2.73446e-05	2.68439e-05
4.42833	5.12227e-05	2.86068e-05	2.75971e-05	2.72854e-05
4.43	5.04834e-05	2.86726e-05	2.78893e-05	2.77819e-05
4.43167	4.9737e-05	2.8761e-05	2.8221e-05	2.8314e-05
4.43333	4.89876e-05	2.88755e-05	2.85819e-05	2.88687e-05
4.435	4.82241e-05	2.90152e-05	2.89616e-05	2.94284e-05
4.43667	4.74442e-05	2.91712e-05	2.93546e-05	3.00058e-05
4.43833	4.66509e-05	2.93425e-05	2.97692e-05	3.06186e-05
4.44	4.5843e-05	2.95265e-05	3.02027e-05	3.12581e-05
4.44167	4.50256e-05	2.97248e-05	3.06635e-05	3.18936e-05
4.44333	4.42121e-05	2.99421e-05	3.11563e-05	3.25084e-05
4.445	4.34188e-05	3.01811e-05	3.16784e-05	3.31065e-05
4.44667	4.26623e-05	3.04678e-05	3.22278e-05	3.36977e-05
4.44833	4.19338e-05	3.08005e-05	3.27677e-05	3.42475e-05
4.45	4.12186e-05	3.11666e-05	3.32794e-05	3.47352e-05
4.45167	4.05109e-05	3.15479e-05	3.37487e-05	3.51559e-05
4.45333	3.9823e-05	3.1933e-05	3.41963e-05	3.55274e-05
4.455	3.91732e-05	3.23432e-05	3.46429e-05	3.58614e-05
4.45667	3.85639e-05	3.27967e-05	3.50868e-05	3.61461e-05
4.45833	3.79972e-05	3.33242e-05	3.55344e-05	3.63935e-05
4.46	3.74591e-05	3.38959e-05	3.59406e-05	3.65748e-05
4.46167	3.69526e-05	3.44747e-05	3.62817e-05	3.66772e-05
4.46333	3.64932e-05	3.50545e-05	3.65559e-05	3.67038e-05
4.465	3.60851e-05	3.56442e-05	3.67811e-05	3.66723e-05
4.46667	3.57265e-05	3.62672e-05	3.69752e-05	3.66141e-05
4.46833	3.5408e-05	3.6901e-05	3.71109e-05	3.65225e-05
4.47	3.513e-05	3.75349e-05	3.71891e-05	3.63944e-05
4.47167	3.48908e-05	3.81787e-05	3.72108e-05	3.62043e-05
4.47333	3.46845e-05	3.88505e-05	3.71995e-05	3.59373e-05
4.475	3.45062e-05	3.9561e-05	3.71778e-05	3.56042e-05
4.47667	3.4352e-05	4.03039e-05	3.71495e-05	3.52308e-05
4.47833	3.42041e-05	4.10541e-05	3.70874e-05	3.48465e-05
4.48	3.40664e-05	4.17871e-05	3.69696e-05	3.44534e-05
4.48167	3.39471e-05	4.24769e-05	3.67952e-05	3.40327e-05
4.48333	3.38449e-05	4.3109e-05	3.657e-05	3.35686e-05
4.485	3.37516e-05	4.36707e-05	3.63015e-05	3.30474e-05
4.48667	3.36634e-05	4.41693e-05	3.59999e-05	3.24858e-05
4.48833	3.35803e-05	4.46228e-05	3.56823e-05	3.19024e-05
4.49	3.34857e-05	4.50493e-05	3.53639e-05	3.13142e-05
4.49167	3.33588e-05	4.54325e-05	3.50359e-05	3.07004e-05
4.49333	3.32084e-05	4.57463e-05	3.46825e-05	3.00521e-05
4.495	3.30573e-05	4.59916e-05	3.43037e-05	2.93909e-05
4.49667	3.29215e-05	4.61962e-05	3.39249e-05	2.87485e-05
4.49833	3.27952e-05	4.63702e-05	3.35612e-05	2.81238e-05
4.5	3.2648e-05	4.6501e-05	3.32012e-05	2.74893e-05
4.50167	3.24614e-05	4.65587e-05	3.28176e-05	2.68361e-05
4.50333	3.22412e-05	4.65434e-05	3.23946e-05	2.61818e-05
4.505	3.2014e-05	4.64775e-05	3.19356e-05	2.55443e-05
4.50667	3.17906e-05	4.6382e-05	3.14626e-05	2.49413e-05
4.50833	3.15564e-05	4.62638e-05	3.09999e-05	2.43797e-05
4.51	3.12982e-05	4.61088e-05	3.05636e-05	2.38516e-05
4.51167	3.1012e-05	4.59023e-05	3.01282e-05	2.33382e-05
4.51333	3.07086e-05	4.56543e-05	2.96769e-05	2.28417e-05
4.515	3.0404e-05	4.53865e-05	2.92217e-05	2.23894e-05
4.51667	3.01006e-05	4.51115e-05	2.87986e-05	2.19874e-05
4.51833	2.97986e-05	4.48302e-05	2.84245e-05	2.16337e-05
4.52	2.9492e-05	4.45318e-05	2.8073e-05	2.13135e-05
4.52167	2.91753e-05	4.42117e-05	2.77224e-05	2.10159e-05
4.52333	2.88422e-05	4.38519e-05	2.73578e-05	2.07311e-05
4.525	2.84938e-05	4.34678e-05	2.70016e-05	2.04651e-05
4.52667	2.81333e-05	4.30747e-05	2.66661e-05	2.02365e-05
4.52833	2.77703e-05	4.2687e-05	2.63617e-05	2.00533e-05
4.53	2.74035e-05	4.23002e-05	2.60762e-05	1.98966e-05
4.53167	2.70348e-05	4.19089e-05	2.58123e-05	1.97666e-05
4.53333	2.66616e-05	4.14932e-05	2.55749e-05	1.96493e-05
4.535	2.6291e-05	4.10379e-05	2.53742e-05	1.95478e-05
4.53667	2.59394e-05	4.05438e-05	2.51989e-05	1.94394e-05
4.53833	2.56101e-05	4.00334e-05	2.50472e-05	1.93251e-05
4.54	2.52896e-05	3.95339e-05	2.49199e-05	1.92177e-05
4.54167	2.49501e-05	3.9056e-05	2.48144e-05	1.91251e-05
4.54333	2.45991e-05	3.8607e-05	2.47306e-05	1.90591e-05
4.545	2.4252e-05	3.81652e-05	2.46486e-05	1.9001e-05
4.54667	2.39309e-05	3.77234e-05	2.45817e-05	1.89557e-05
4.54833	2.36383e-05	3.72933e-05	2.45402e-05	1.89074e-05
4.55	2.33591e-05	3.68803e-05	2.45223e-05	1.88433e-05
4.55167	2.30817e-05	3.64818e-05	2.45185e-05	1.87487e-05
4.55333	2.28e-05	3.6095e-05	2.45157e-05	1.86276e-05
4.555	2.25258e-05	3.57325e-05	2.45232e-05	1.84965e-05
4.55667	2.22656e-05	3.54107e-05	2.45496e-05	1.83714e-05
4.55833	2.20137e-05	3.51212e-05	2.45873e-05	1.82541e-05
4.56	2.17617e-05	3.48543e-05	2.46184e-05	1.81231e-05
4.56167	2.15276e-05	3.461e-05	2.46259e-05	1.79723e-05
4.56333	2.13156e-05	3.44071e-05	2.46137e-05	1.7797e-05
4.565	2.11265e-05	3.42457e-05	2.45873e-05	1.76097e-05
4.56667	2.0964e-05	3.41131e-05	2.45487e-05	1.74186e-05
4.56833	2.08295e-05	3.40059e-05	2.45091e-05	1.72412e-05
4.57	2.07171e-05	3.39274e-05	2.4479e-05	1.70895e-05
4.57167	2.05991e-05	3.38697e-05	2.44497e-05	1.69427e-05
4.57333	2.04785e-05	3.38202e-05	2.44196e-05	1.6789e-05
4.575	2.037e-05	3.37696e-05	2.43781e-05	1.66116e-05
4.57667	2.02932e-05	3.373e-05	2.43348e-05	1.64195e-05
4.57833	2.02361e-05	3.3702e-05	2.42745e-05	1.62116e-05
4.58	2.01784e-05	3.36777e-05	2.41802e-05	1.59869e-05
4.58167	2.01149e-05	3.36443e-05	2.40587e-05	1.57456e-05
4.58333	2.00514e-05	3.35938e-05	2.39211e-05	1.5511e-05
4.585	1.99949e-05	3.35217e-05	2.37675e-05	1.52874e-05
4.58667	1.99423e-05	3.34108e-05	2.35837e-05	1.50686e-05
4.58833	1.98979e-05	3.32602e-05	2.33764e-05	1.48361e-05
4.59	1.9868e-05	3.30916e-05	2.31748e-05	1.45859e-05
4.59167	1.98534e-05	3.29356e-05	2.29976e-05	1.43375e-05
4.59333	1.98471e-05	3.27832e-05	2.28318e-05	1.40932e-05
4.595	1.98382e-05	3.26065e-05	2.2664e-05	1.38833e-05
4.59667	1.9816e-05	3.23739e-05	2.24756e-05	1.37109e-05
4.59833	1.97855e-05	3.20881e-05	2.22729e-05	1.35641e-05
4.6	1.97513e-05	3.17779e-05	2.20656e-05	1.34143e-05
4.60167	1.9717e-05	3.14578e-05	2.18479e-05	1.3235e-05
4.60333	1.96852e-05	3.11467e-05	2.16133e-05	1.30419e-05
4.605	1.96484e-05	3.08257e-05	2.13485e-05	1.28379e-05
4.60667	1.96002e-05	3.04885e-05	2.10658e-05	1.26488e-05
4.60833	1.95355e-05	3.01342e-05	2.07992e-05	1.24941e-05
4.61	1.94651e-05	2.976e-05	2.05824e-05	1.23689e-05
4.61167	1.93984e-05	2.93696e-05	2.04156e-05	1.22665e-05
4.61333	1.93337e-05	2.89557e-05	2.02695e-05	1.2161e-05
4.615	1.92588e-05	2.85382e-05	2.01131e-05	1.20536e-05
4.61667	1.91757e-05	2.81388e-05	1.99426e-05	1.19453e-05
4.61833	1.90849e-05	2.77484e-05	1.97645e-05	1.18339e-05
4.62	1.89713e-05	2.73471e-05	1.95835e-05	1.17295e-05
4.62167	1.88216e-05	2.69171e-05	1.94121e-05	1.16487e-05
4.62333	1.86388e-05	2.64735e-05	1.92547e-05	1.16034e-05
4.625	1.84509e-05	2.6046e-05	1.91105e-05	1.15856e-05
4.62667	1.82891e-05	2.56521e-05	1.89795e-05	1.15699e-05
4.62833	1.81558e-05	2.52814e-05	1.88523e-05	1.15363e-05
4.63	1.80333e-05	2.49217e-05	1.8726e-05	1.1491e-05
4.63167	1.78931e-05	2.45502e-05	1.86044e-05	1.14565e-05
4.63333	1.77363e-05	2.41562e-05	1.85036e-05	1.14496e-05
4.635	1.75853e-05	2.37487e-05	1.84414e-05	1.14713e-05
4.63667	1.74508e-05	2.33565e-05	1.84188e-05	1.15157e-05
4.63833	1.73251e-05	2.3003e-05	1.84179e-05	1.15846e-05
4.64	1.71868e-05	2.26721e-05	1.84037e-05	1.16595e-05
4.64167	1.70408e-05	2.23457e-05	1.83727e-05	1.17275e-05
4.64333	1.68917e-05	2.20175e-05	1.83491e-05	1.17837e-05
4.645	1.67432e-05	2.16974e-05	1.83585e-05	1.18408e-05
4.64667	1.65915e-05	2.14061e-05	1.84103e-05	1.19098e-05
4.64833	1.64214e-05	2.11167e-05	1.84669e-05	1.19679e-05
4.65	1.62317e-05	2.08192e-05	1.85074e-05	1.20132e-05
4.65167	1.60273e-05	2.05225e-05	1.85234e-05	1.20517e-05
4.65333	1.5823e-05	2.02485e-05	1.85262e-05	1.2094e-05
4.655	1.56294e-05	2.00014e-05	1.8547e-05	1.21433e-05
4.65667	1.54549e-05	1.97778e-05	1.8595e-05	1.21926e-05
4.65833	1.52956e-05	1.95695e-05	1.86695e-05	1.22389e-05
4.66	1.51484e-05	1.93901e-05	1.87562e-05	1.22665e-05
4.66167	1.50062e-05	1.92368e-05	1.8841e-05	1.22743e-05
4.66333	1.48488e-05	1.90934e-05	1.89107e-05	1.22714e-05
4.665	1.46718e-05	1.89383e-05	1.89475e-05	1.22645e-05
4.66667	1.45004e-05	1.87833e-05	1.89767e-05	1.22743e-05
4.66833	1.43621e-05	1.86579e-05	1.90191e-05	1.23098e-05
4.67	1.4258e-05	1.85605e-05	1.90803e-05	1.2362e-05
4.67167	1.41711e-05	1.84848e-05	1.91501e-05	1.24084e-05
4.67333	1.40892e-05	1.84253e-05	1.92198e-05	1.2429e-05
4.675	1.40061e-05	1.83892e-05	1.92942e-05	1.24271e-05
4.67667	1.39178e-05	1.83757e-05	1.9364e-05	1.24133e-05
4.67833	1.38271e-05	1.83712e-05	1.94196e-05	1.23985e-05
4.68	1.37433e-05	1.83757e-05	1.9462e-05	1.23916e-05
4.68167	1.36722e-05	1.83928e-05	1.94949e-05	1.23955e-05
4.68333	1.36107e-05	1.84253e-05	1.95289e-05	1.24024e-05
4.685	1.35485e-05	1.84622e-05	1.956e-05	1.23916e-05
4.68667	1.34812e-05	1.84948e-05	1.95902e-05	1.23453e-05
4.68833	1.34197e-05	1.8538e-05	1.96231e-05	1.22803e-05
4.69	1.33759e-05	1.85993e-05	1.96495e-05	1.2234e-05
4.69167	1.33384e-05	1.86714e-05	1.96589e-05	1.22143e-05
4.69333	1.32991e-05	1.87364e-05	1.96457e-05	1.21916e-05
4.695	1.32559e-05	1.87869e-05	1.96099e-05	1.21295e-05
4.69667	1.32248e-05	1.88338e-05	1.95703e-05	1.20379e-05
4.69833	1.32083e-05	1.88842e-05	1.95298e-05	1.19423e-05
4.7	1.32007e-05	1.89429e-05	1.94884e-05	1.18694e-05
4.70167	1.31957e-05	1.90087e-05	1.94535e-05	1.1827e-05
4.70333	1.31969e-05	1.90826e-05	1.94215e-05	1.17876e-05
4.705	1.3209e-05	1.91511e-05	1.93781e-05	1.17196e-05
4.70667	1.32458e-05	1.92187e-05	1.93159e-05	1.1624e-05
4.70833	1.3315e-05	1.93017e-05	1.92537e-05	1.15235e-05
4.71	1.33994e-05	1.94027e-05	1.92066e-05	1.14398e-05
4.71167	1.34705e-05	1.951e-05	1.91689e-05	1.13767e-05
4.71333	1.35111e-05	1.96074e-05	1.91218e-05	1.13314e-05
4.715	1.35314e-05	1.96885e-05	1.9052e-05	1.13028e-05
4.71667	1.35517e-05	1.97643e-05	1.89711e-05	1.12812e-05
4.71833	1.35771e-05	1.98445e-05	1.889e-05	1.12575e-05
4.72	1.36043e-05	1.99329e-05	1.88099e-05	1.12161e-05
4.72167	1.36272e-05	2.00059e-05	1.87185e-05	1.11314e-05
4.72333	1.36532e-05	2.00492e-05	1.86224e-05	1.10161e-05
4.725	1.36824e-05	2.00663e-05	1.85121e-05	1.09048e-05
4.72667	1.37052e-05	2.00654e-05	1.8383e-05	1.08249e-05
4.72833	1.37122e-05	2.00537e-05	1.82454e-05	1.07708e-05
4.73	1.37053e-05	2.00411e-05	1.81257e-05	1.07166e-05
4.73167	1.37046e-05	2.00456e-05	1.80447e-05	1.06594e-05
4.73333	1.37192e-05	2.00744e-05	1.7991e-05	1.06279e-05
4.735	1.37351e-05	2.00997e-05	1.79429e-05	1.06102e-05
4.73667	1.37363e-05	2.01033e-05	1.78854e-05	1.05974e-05
4.73833	1.37135e-05	2.00861e-05	1.78242e-05	1.05698e-05
4.74	1.36722e-05	2.00699e-05	1.7763e-05	1.05363e-05
4.74167	1.36253e-05	2.00663e-05	1.7697e-05	1.05146e-05
4.74333	1.35891e-05	2.00537e-05	1.76235e-05	1.04979e-05
4.745	1.35701e-05	2.00239e-05	1.755e-05	1.0488e-05
4.74667	1.35624e-05	1.99761e-05	1.74859e-05	1.04821e-05
4.74833	1.3558e-05	1.99346e-05	1.74322e-05	1.0487e-05
4.75	1.3546e-05	1.99094e-05	1.73879e-05	1.05038e-05
4.75167	1.35219e-05	1.98905e-05	1.7338e-05	1.05324e-05
4.75333	1.34787e-05	1.98626e-05	1.72692e-05	1.05688e-05
4.755	1.34228e-05	1.98166e-05	1.71919e-05	1.06013e-05
4.75667	1.33714e-05	1.97706e-05	1.71372e-05	1.06378e-05
4.75833	1.33289e-05	1.97219e-05	1.71174e-05	1.0688e-05
4.76	1.32978e-05	1.96633e-05	1.71212e-05	1.07511e-05
4.76167	1.32654e-05	1.95812e-05	1.71203e-05	1.08052e-05
4.76333	1.32248e-05	1.9482e-05	1.71024e-05	1.08368e-05
4.765	1.31734e-05	1.93783e-05	1.70732e-05	1.08526e-05
4.76667	1.31074e-05	1.92756e-05	1.70336e-05	1.08604e-05
4.76833	1.30389e-05	1.91782e-05	1.69987e-05	1.08831e-05
4.77	1.29818e-05	1.90961e-05	1.69836e-05	1.09402e-05
4.77167	1.29399e-05	1.90303e-05	1.69931e-05	1.10299e-05
4.77333	1.29012e-05	1.89609e-05	1.70044e-05	1.11196e-05
4.775	1.28612e-05	1.88833e-05	1.70063e-05	1.11984e-05
4.77667	1.28181e-05	1.88085e-05	1.69978e-05	1.12644e-05
4.77833	1.27679e-05	1.87535e-05	1.69921e-05	1.13314e-05
4.78	1.27114e-05	1.87084e-05	1.7011e-05	1.14103e-05
4.78167	1.26575e-05	1.86561e-05	1.70637e-05	1.15039e-05
4.78333	1.26124e-05	1.85912e-05	1.71363e-05	1.16024e-05
4.785	1.25763e-05	1.85182e-05	1.72042e-05	1.16881e-05
4.78667	1.25445e-05	1.84559e-05	1.72645e-05	1.17719e-05
4.78833	1.25287e-05	1.84208e-05	1.73219e-05	1.18704e-05
4.79	1.25255e-05	1.8401e-05	1.73804e-05	1.19808e-05
4.79167	1.25274e-05	1.83676e-05	1.74303e-05	1.20714e-05
4.79333	1.25261e-05	1.83081e-05	1.74633e-05	1.21265e-05
4.795	1.25198e-05	1.82477e-05	1.74831e-05	1.21561e-05
4.79667	1.25052e-05	1.82026e-05	1.74934e-05	1.21837e-05
4.79833	1.24842e-05	1.81747e-05	1.75095e-05	1.22291e-05
4.8	1.24665e-05	1.81638e-05	1.75509e-05	1.23049e-05
4.80167	1.24481e-05	1.81611e-05	1.76235e-05	1.23995e-05
4.80333	1.24265e-05	1.81665e-05	1.77177e-05	1.24901e-05
4.805	1.24036e-05	1.81737e-05	1.78007e-05	1.25621e-05
4.80667	1.24005e-05	1.81918e-05	1.78657e-05	1.26222e-05
4.80833	1.24233e-05	1.82233e-05	1.79175e-05	1.26763e-05
4.81	1.24563e-05	1.82639e-05	1.79599e-05	1.27276e-05
4.81167	1.24652e-05	1.83027e-05	1.79844e-05	1.27621e-05
4.81333	1.24525e-05	1.8336e-05	1.7992e-05	1.27798e-05
4.815	1.24398e-05	1.83685e-05	1.80033e-05	1.27995e-05
4.81667	1.24398e-05	1.84019e-05	1.80249e-05	1.28311e-05
4.81833	1.24557e-05	1.84442e-05	1.80513e-05	1.28714e-05
4.82	1.24836e-05	1.85038e-05	1.80767e-05	1.29296e-05
4.82167	1.25267e-05	1.85759e-05	1.81135e-05	1.30113e-05
4.82333	1.25744e-05	1.8648e-05	1.81663e-05	1.30902e-05
4.825	1.26124e-05	1.87021e-05	1.82228e-05	1.31463e-05
4.82667	1.26416e-05	1.87409e-05	1.82709e-05	1.31818e-05
4.82833	1.26759e-05	1.8785e-05	1.83133e-05	1.32252e-05
4.83	1.2719e-05	1.88455e-05	1.83406e-05	1.32734e-05
4.83167	1.2766e-05	1.89221e-05	1.835e-05	1.33237e-05
4.83333	1.28149e-05	1.90068e-05	1.83548e-05	1.33877e-05
4.835	1.28707e-05	1.90943e-05	1.83821e-05	1.34734e-05
4.83667	1.29285e-05	1.91746e-05	1.8433e-05	1.35543e-05
4.83833	1.29786e-05	1.92476e-05	1.84895e-05	1.36035e-05
4.84	1.30243e-05	1.93215e-05	1.85366e-05	1.3643e-05
4.84167	1.30757e-05	1.94036e-05	1.858e-05	1.37011e-05
4.84333	1.31392e-05	1.95019e-05	1.86572e-05	1.37976e-05
4.845	1.32033e-05	1.95938e-05	1.87656e-05	1.3904e-05
4.84667	1.32623e-05	1.96714e-05	1.88852e-05	1.40015e-05
4.84833	1.33143e-05	1.97246e-05	1.89871e-05	1.40834e-05
4.85	1.336e-05	1.97705e-05	1.90662e-05	1.41553e-05
4.85167	1.34057e-05	1.98264e-05	1.91407e-05	1.42302e-05
4.85333	1.34603e-05	1.98923e-05	1.92254e-05	1.43198e-05
4.855	1.35263e-05	1.99671e-05	1.93272e-05	1.44262e-05
4.85667	1.36005e-05	2.00402e-05	1.9445e-05	1.45376e-05
4.85833	1.36716e-05	2.01078e-05	1.95798e-05	1.46351e-05
4.86	1.37243e-05	2.01528e-05	1.97211e-05	1.46962e-05
4.86167	1.37649e-05	2.01772e-05	1.98653e-05	1.47199e-05
4.86333	1.38144e-05	2.01853e-05	2.00057e-05	1.47267e-05
4.865	1.38842e-05	2.01934e-05	2.01471e-05	1.47415e-05
4.86667	1.3968e-05	2.02178e-05	2.02818e-05	1.4775e-05
4.86833	1.40562e-05	2.02655e-05	2.04165e-05	1.48203e-05
4.87	1.41501e-05	2.03223e-05	2.05523e-05	1.48647e-05
4.87167	1.42612e-05	2.03819e-05	2.06983e-05	1.49208e-05
4.87333	1.43932e-05	2.04251e-05	2.0851e-05	1.49997e-05
4.875	1.45455e-05	2.04513e-05	2.10131e-05	1.51071e-05
4.87667	1.47054e-05	2.04576e-05	2.11865e-05	1.52214e-05
4.87833	1.48571e-05	2.04396e-05	2.13401e-05	1.52963e-05
4.88	1.50075e-05	2.04206e-05	2.14616e-05	1.53297e-05
4.88167	1.51693e-05	2.04152e-05	2.15549e-05	1.53298e-05
4.88333	1.53591e-05	2.04387e-05	2.16501e-05	1.53239e-05
4.885	1.5585e-05	2.04721e-05	2.17698e-05	1.5316e-05
4.88667	1.58369e-05	2.0491e-05	2.19149e-05	1.53041e-05
4.88833	1.61022e-05	2.0482e-05	2.20666e-05	1.52953e-05
4.89	1.637e-05	2.04522e-05	2.21919e-05	1.53002e-05
4.89167	1.66467e-05	2.04053e-05	2.22682e-05	1.53199e-05
4.89333	1.69437e-05	2.03765e-05	2.23116e-05	1.53475e-05
4.895	1.72629e-05	2.03783e-05	2.23465e-05	1.53761e-05
4.89667	1.75948e-05	2.04054e-05	2.23823e-05	1.54007e-05
4.89833	1.79255e-05	2.04378e-05	2.24049e-05	1.54184e-05
4.9	1.82497e-05	2.04504e-05	2.24049e-05	1.54253e-05
4.90167	1.85778e-05	2.04522e-05	2.23945e-05	1.54263e-05
4.90333	1.89199e-05	2.04414e-05	2.23804e-05	1.54233e-05
4.905	1.92829e-05	2.04342e-05	2.23719e-05	1.54312e-05
4.90667	1.96618e-05	2.04279e-05	2.23653e-05	1.54411e-05
4.90833	2.00533e-05	2.04296e-05	2.23662e-05	1.54608e-05
4.91	2.04468e-05	2.04387e-05	2.2354e-05	1.54766e-05
4.91167	2.08301e-05	2.04477e-05	2.23144e-05	1.54864e-05
4.91333	2.119e-05	2.04558e-05	2.22447e-05	1.54835e-05
4.915	2.15257e-05	2.04531e-05	2.21523e-05	1.54707e-05
4.91667	2.18404e-05	2.04459e-05	2.20468e-05	1.54539e-05
4.91833	2.21451e-05	2.04378e-05	2.19309e-05	1.54391e-05
4.92	2.2442e-05	2.04251e-05	2.18206e-05	1.54361e-05
4.92167	2.27276e-05	2.04125e-05	2.17227e-05	1.54608e-05
4.92333	2.29999e-05	2.04053e-05	2.16406e-05	1.55081e-05
4.925	2.32537e-05	2.04062e-05	2.15634e-05	1.55682e-05
4.92667	2.34841e-05	2.0399e-05	2.14965e-05	1.56204e-05
4.92833	2.36903e-05	2.039e-05	2.14352e-05	1.56618e-05
4.93	2.38731e-05	2.03828e-05	2.13806e-05	1.56825e-05
4.93167	2.40438e-05	2.03855e-05	2.13146e-05	1.56894e-05
4.93333	2.41987e-05	2.03792e-05	2.12194e-05	1.56776e-05
4.935	2.43395e-05	2.03593e-05	2.1113e-05	1.56647e-05
4.93667	2.44652e-05	2.03521e-05	2.10281e-05	1.56785e-05
4.93833	2.4575e-05	2.03657e-05	2.09848e-05	1.57239e-05
4.94	2.46626e-05	2.03927e-05	2.09575e-05	1.57781e-05
4.94167	2.4721e-05	2.04198e-05	2.09236e-05	1.58096e-05
4.94333	2.47552e-05	2.04486e-05	2.08783e-05	1.58244e-05
4.945	2.47698e-05	2.04802e-05	2.08284e-05	1.58461e-05
4.94667	2.47698e-05	2.05054e-05	2.07822e-05	1.58865e-05
4.94833	2.47514e-05	2.05063e-05	2.07351e-05	1.59308e-05
4.95	2.47203e-05	2.04873e-05	2.06955e-05	1.5985e-05
4.95167	2.46835e-05	2.04585e-05	2.06681e-05	1.60628e-05
4.95333	2.46467e-05	2.04342e-05	2.06578e-05	1.6185e-05
4.955	2.46137e-05	2.04161e-05	2.06531e-05	1.63328e-05
4.95667	2.45744e-05	2.0417e-05	2.06342e-05	1.64668e-05
4.95833	2.45122e-05	2.04459e-05	2.05975e-05	1.65663e-05
4.96	2.44183e-05	2.04919e-05	2.05579e-05	1.66461e-05
4.96167	2.43034e-05	2.05442e-05	2.05429e-05	1.67437e-05
4.96333	2.41809e-05	2.0583e-05	2.05485e-05	1.68688e-05
4.965	2.40515e-05	2.06028e-05	2.05532e-05	1.70058e-05
4.96667	2.3922e-05	2.06046e-05	2.05589e-05	1.71585e-05
4.96833	2.37932e-05	2.05902e-05	2.05711e-05	1.7321e-05
4.97	2.36656e-05	2.05676e-05	2.06022e-05	1.75023e-05
4.97167	2.35342e-05	2.05532e-05	2.06578e-05	1.77161e-05
4.97333	2.33972e-05	2.05613e-05	2.0737e-05	1.79506e-05
4.975	2.32563e-05	2.05965e-05	2.08236e-05	1.82039e-05
4.97667	2.31192e-05	2.06398e-05	2.08905e-05	1.84571e-05
4.97833	2.29891e-05	2.06659e-05	2.09273e-05	1.87142e-05
4.98	2.28666e-05	2.06686e-05	2.09594e-05	1.89695e-05
4.98167	2.27429e-05	2.06623e-05	2.10103e-05	1.92109e-05
4.98333	2.26102e-05	2.06704e-05	2.1095e-05	1.94414e-05
4.985	2.24706e-05	2.0702e-05	2.12119e-05	1.9669e-05
4.98667	2.23228e-05	2.07417e-05	2.13429e-05	1.99134e-05
4.98833	2.2166e-05	2.07642e-05	2.14814e-05	2.01715e-05
4.99	2.19997e-05	2.0756e-05	2.16199e-05	2.04168e-05
4.99167	2.18309e-05	2.07263e-05	2.17641e-05	2.06326e-05
4.99333	2.16615e-05	2.06947e-05	2.19121e-05	2.08189e-05
4.995	2.1506e-05	2.06803e-05	2.20788e-05	2.10119e-05
4.99667	2.13645e-05	2.06848e-05	2.22729e-05	2.12238e-05
4.99833	2.12287e-05	2.06957e-05	2.2485e-05	2.14396e-05
5	2.10852e-05	2.06929e-05	2.26942e-05	2.16337e-05
5.00167	2.09393e-05	2.06812e-05	2.28883e-05	2.17982e-05
5.00333	2.08003e-05	2.0674e-05	2.3073e-05	2.1949e-05
5.005	2.06715e-05	2.06884e-05	2.32549e-05	2.20918e-05
5.00667	2.05496e-05	2.07281e-05	2.3448e-05	2.22387e-05
5.00833	2.04284e-05	2.07795e-05	2.36553e-05	2.23865e-05
5.01	2.03205e-05	2.08399e-05	2.38674e-05	2.25214e-05
5.01167	2.0226e-05	2.08985e-05	2.40681e-05	2.26259e-05
5.01333	2.01422e-05	2.0958e-05	2.42481e-05	2.26909e-05
5.015	2.00584e-05	2.10247e-05	2.44111e-05	2.27313e-05
5.01667	1.99708e-05	2.11032e-05	2.45675e-05	2.27579e-05
5.01833	1.98865e-05	2.12015e-05	2.47259e-05	2.27816e-05
5.02	1.98071e-05	2.13151e-05	2.48861e-05	2.28032e-05
5.02167	1.9738e-05	2.14494e-05	2.50425e-05	2.28308e-05
5.02333	1.96827e-05	2.16072e-05	2.51791e-05	2.28633e-05
5.025	1.96377e-05	2.17929e-05	2.52875e-05	2.28968e-05
5.02667	1.96002e-05	2.20112e-05	2.53826e-05	2.29313e-05
5.02833	1.95628e-05	2.22393e-05	2.54731e-05	2.29638e-05
5.03	1.95393e-05	2.24674e-05	2.55711e-05	2.30092e-05
5.03167	1.95355e-05	2.26874e-05	2.56625e-05	2.30663e-05
5.03333	1.95488e-05	2.2911e-05	2.57285e-05	2.31195e-05
5.035	1.95577e-05	2.31427e-05	2.57549e-05	2.31343e-05
5.03667	1.95469e-05	2.3361e-05	2.57342e-05	2.30929e-05
5.03833	1.95266e-05	2.35512e-05	2.56946e-05	2.30141e-05
5.04	1.95196e-05	2.37225e-05	2.56663e-05	2.29333e-05
5.04167	1.95399e-05	2.38947e-05	2.56484e-05	2.28624e-05
5.04333	1.95888e-05	2.40814e-05	2.56333e-05	2.28052e-05
5.045	1.96548e-05	2.42779e-05	2.5605e-05	2.27579e-05
5.04667	1.97316e-05	2.44853e-05	2.55767e-05	2.27214e-05
5.04833	1.98122e-05	2.47134e-05	2.55655e-05	2.27106e-05
5.05	1.98953e-05	2.49578e-05	2.55692e-05	2.27234e-05
5.05167	1.99772e-05	2.51859e-05	2.55645e-05	2.27264e-05
5.05333	2.0054e-05	2.53698e-05	2.55287e-05	2.26958e-05
5.055	2.01231e-05	2.54916e-05	2.54637e-05	2.26249e-05
5.05667	2.01853e-05	2.557e-05	2.5393e-05	2.25303e-05
5.05833	2.02418e-05	2.56367e-05	2.53317e-05	2.24288e-05
5.06	2.03015e-05	2.57007e-05	2.52846e-05	2.23391e-05
5.06167	2.03827e-05	2.57629e-05	2.5247e-05	2.22702e-05
5.06333	2.04773e-05	2.58107e-05	2.52017e-05	2.21992e-05
5.065	2.05782e-05	2.58441e-05	2.51395e-05	2.21056e-05
5.06667	2.0674e-05	2.58684e-05	2.50557e-05	2.19805e-05
5.06833	2.07622e-05	2.58802e-05	2.49426e-05	2.18436e-05
5.07	2.08434e-05	2.58757e-05	2.48059e-05	2.17125e-05
5.07167	2.09158e-05	2.58513e-05	2.46542e-05	2.15933e-05
5.07333	2.09977e-05	2.58044e-05	2.4511e-05	2.14869e-05
5.075	2.10891e-05	2.57269e-05	2.43857e-05	2.13814e-05
5.07667	2.11862e-05	2.5616e-05	2.42641e-05	2.12682e-05
5.07833	2.12839e-05	2.54916e-05	2.41378e-05	2.11529e-05
5.08	2.13803e-05	2.53797e-05	2.40115e-05	2.10445e-05
5.08167	2.14971e-05	2.52995e-05	2.39164e-05	2.09558e-05
5.08333	2.16342e-05	2.52265e-05	2.38636e-05	2.08829e-05
5.085	2.17782e-05	2.51246e-05	2.38231e-05	2.081e-05
5.08667	2.1907e-05	2.49686e-05	2.37439e-05	2.07144e-05
5.08833	2.202e-05	2.47693e-05	2.36082e-05	2.05962e-05
5.09	2.21248e-05	2.4552e-05	2.3449e-05	2.04573e-05
5.09167	2.22288e-05	2.43392e-05	2.33058e-05	2.03124e-05
5.09333	2.23475e-05	2.41562e-05	2.32021e-05	2.01873e-05
5.095	2.24979e-05	2.40228e-05	2.31428e-05	2.00986e-05
5.09667	2.26902e-05	2.39317e-05	2.3106e-05	2.00335e-05
5.09833	2.29072e-05	2.3837e-05	2.30306e-05	1.99518e-05
5.1	2.313e-05	2.36909e-05	2.28836e-05	1.98434e-05
5.10167	2.33464e-05	2.34836e-05	2.26923e-05	1.97143e-05
5.10333	2.35571e-05	2.32428e-05	2.25057e-05	1.95843e-05
5.105	2.37735e-05	2.3003e-05	2.23559e-05	1.94729e-05
5.10667	2.39981e-05	2.27749e-05	2.22315e-05	1.93941e-05
5.10833	2.42291e-05	2.25558e-05	2.21184e-05	1.93507e-05
5.11	2.44601e-05	2.23447e-05	2.19921e-05	1.93212e-05
5.11167	2.4688e-05	2.21599e-05	2.18555e-05	1.92936e-05
5.11333	2.49234e-05	2.19995e-05	2.17321e-05	1.92631e-05
5.115	2.5176e-05	2.18462e-05	2.16369e-05	1.92335e-05
5.11667	2.54508e-05	2.16821e-05	2.15738e-05	1.92079e-05
5.11833	2.57351e-05	2.15036e-05	2.15191e-05	1.91921e-05
5.12	2.60111e-05	2.1334e-05	2.14625e-05	1.91902e-05
5.12167	2.62707e-05	2.11726e-05	2.13871e-05	1.91862e-05
5.12333	2.65042e-05	2.10139e-05	2.12731e-05	1.91616e-05
5.125	2.67111e-05	2.08436e-05	2.11224e-05	1.91212e-05
5.12667	2.69072e-05	2.06569e-05	2.09613e-05	1.90896e-05
5.12833	2.71046e-05	2.04675e-05	2.08255e-05	1.90946e-05
5.13	2.72994e-05	2.02971e-05	2.07256e-05	1.913e-05
5.13167	2.74784e-05	2.01574e-05	2.06503e-05	1.91823e-05
5.13333	2.7632e-05	2.00293e-05	2.05937e-05	1.92305e-05
5.135	2.77526e-05	1.98914e-05	2.05532e-05	1.92631e-05
5.13667	2.78338e-05	1.97327e-05	2.05136e-05	1.92877e-05
5.13833	2.78788e-05	1.95767e-05	2.04693e-05	1.93153e-05
5.14	2.79106e-05	1.94441e-05	2.04307e-05	1.93596e-05
5.14167	2.79506e-05	1.93495e-05	2.04165e-05	1.94227e-05
5.14333	2.79874e-05	1.9271e-05	2.04251e-05	1.94917e-05
5.145	2.80045e-05	1.91845e-05	2.04411e-05	1.95666e-05
5.14667	2.79886e-05	1.90844e-05	2.04561e-05	1.96503e-05
5.14833	2.79461e-05	1.89879e-05	2.04759e-05	1.97498e-05
5.15	2.78865e-05	1.89185e-05	2.05033e-05	1.98621e-05
5.15167	2.78002e-05	1.8859e-05	2.05259e-05	1.99646e-05
5.15333	2.76891e-05	1.87985e-05	2.05409e-05	2.00513e-05
5.155	2.75526e-05	1.8731e-05	2.05655e-05	2.01301e-05
5.15667	2.73876e-05	1.86552e-05	2.05975e-05	2.01981e-05
5.15833	2.72074e-05	1.85759e-05	2.06352e-05	2.02631e-05
5.16	2.70164e-05	1.8492e-05	2.06568e-05	2.03213e-05
5.16167	2.68234e-05	1.84181e-05	2.06719e-05	2.03833e-05
5.16333	2.66172e-05	1.83586e-05	2.06974e-05	2.04494e-05
5.165	2.63818e-05	1.83099e-05	2.07417e-05	2.05223e-05
5.16667	2.61153e-05	1.82657e-05	2.0802e-05	2.06159e-05
5.16833	2.58176e-05	1.8226e-05	2.08604e-05	2.07322e-05
5.17	2.55073e-05	1.81863e-05	2.09151e-05	2.08652e-05
5.17167	2.51925e-05	1.81476e-05	2.09509e-05	2.09943e-05
5.17333	2.48745e-05	1.81133e-05	2.09754e-05	2.11134e-05
5.175	2.45407e-05	1.80854e-05	2.10017e-05	2.12268e-05
5.17667	2.41879e-05	1.8071e-05	2.10573e-05	2.13519e-05
5.17833	2.38401e-05	1.80736e-05	2.11422e-05	2.14928e-05
5.18	2.35216e-05	1.80971e-05	2.1243e-05	2.16485e-05
5.18167	2.32226e-05	1.81196e-05	2.13335e-05	2.1812e-05
5.18333	2.29205e-05	1.81187e-05	2.13881e-05	2.19736e-05
5.185	2.25944e-05	1.80881e-05	2.14314e-05	2.21342e-05
5.18667	2.2258e-05	1.80529e-05	2.14889e-05	2.23037e-05
5.18833	2.19255e-05	1.8034e-05	2.15851e-05	2.2486e-05
5.19	2.15986e-05	1.80214e-05	2.16981e-05	2.26781e-05
5.19167	2.12794e-05	1.79979e-05	2.18018e-05	2.28712e-05
5.19333	2.09659e-05	1.79699e-05	2.19036e-05	2.30732e-05
5.195	2.06594e-05	1.79555e-05	2.20185e-05	2.32861e-05
5.19667	2.03491e-05	1.79447e-05	2.21429e-05	2.34959e-05
5.19833	2.00286e-05	1.79312e-05	2.22635e-05	2.3692e-05
5.2	1.97062e-05	1.79159e-05	2.237e-05	2.38752e-05
5.20167	1.94022e-05	1.79221e-05	2.25001e-05	2.40634e-05
5.20333	1.91293e-05	1.79483e-05	2.26744e-05	2.42704e-05
5.205	1.88901e-05	1.79772e-05	2.2876e-05	2.44891e-05
5.20667	1.86623e-05	1.79943e-05	2.30636e-05	2.47049e-05
5.20833	1.84306e-05	1.79997e-05	2.32106e-05	2.48911e-05
5.21	1.81933e-05	1.80024e-05	2.33444e-05	2.50478e-05
5.21167	1.79572e-05	1.80105e-05	2.34914e-05	2.51807e-05
5.21333	1.77281e-05	1.80151e-05	2.36459e-05	2.5295e-05
5.215	1.75092e-05	1.8024e-05	2.37957e-05	2.54093e-05
5.21667	1.72997e-05	1.80367e-05	2.39296e-05	2.55266e-05
5.21833	1.70897e-05	1.80538e-05	2.40568e-05	2.563e-05
5.22	1.6872e-05	1.80664e-05	2.41812e-05	2.56902e-05
5.22167	1.66473e-05	1.80565e-05	2.42961e-05	2.57e-05
5.22333	1.64398e-05	1.80466e-05	2.44167e-05	2.56891e-05
5.225	1.62615e-05	1.80637e-05	2.45402e-05	2.56843e-05
5.22667	1.61111e-05	1.81286e-05	2.46627e-05	2.56823e-05
5.22833	1.59658e-05	1.8217e-05	2.47701e-05	2.56488e-05
5.23	1.58007e-05	1.83054e-05	2.48615e-05	2.5567e-05
5.23167	1.56339e-05	1.83937e-05	2.49549e-05	2.54636e-05
5.23333	1.54835e-05	1.84875e-05	2.50434e-05	2.53709e-05
5.235	1.53578e-05	1.85858e-05	2.51084e-05	2.52852e-05
5.23667	1.52474e-05	1.86868e-05	2.5132e-05	2.51768e-05
5.23833	1.5149e-05	1.87977e-05	2.51198e-05	2.5033e-05
5.24	1.50621e-05	1.89167e-05	2.50915e-05	2.48684e-05
5.24167	1.49694e-05	1.90276e-05	2.50566e-05	2.47009e-05
5.24333	1.48552e-05	1.91196e-05	2.50104e-05	2.45098e-05
5.245	1.47219e-05	1.91998e-05	2.49492e-05	2.42861e-05
5.24667	1.45893e-05	1.92774e-05	2.48653e-05	2.40378e-05
5.24833	1.44643e-05	1.93612e-05	2.47777e-05	2.37964e-05
5.25	1.43494e-05	1.94496e-05	2.46891e-05	2.35728e-05
5.25167	1.42383e-05	1.95379e-05	2.4592e-05	2.33422e-05
5.25333	1.41323e-05	1.96227e-05	2.44667e-05	2.30939e-05
5.255	1.40371e-05	1.97038e-05	2.43141e-05	2.28269e-05
5.25667	1.39483e-05	1.97931e-05	2.41472e-05	2.2554e-05
5.25833	1.38588e-05	1.98742e-05	2.3971e-05	2.2282e-05
5.26	1.37611e-05	1.99374e-05	2.37722e-05	2.20101e-05
5.26167	1.36608e-05	1.99708e-05	2.35527e-05	2.17283e-05
5.26333	1.35548e-05	1.9968e-05	2.33105e-05	2.1415e-05
5.265	1.34463e-05	1.99419e-05	2.30683e-05	2.10839e-05
5.26667	1.33257e-05	1.98995e-05	2.28383e-05	2.07568e-05
5.26833	1.32134e-05	1.98661e-05	2.26291e-05	2.04661e-05
5.27	1.31125e-05	1.98382e-05	2.24341e-05	2.0206e-05
5.27167	1.30294e-05	1.98138e-05	2.22334e-05	1.99616e-05
5.27333	1.29469e-05	1.97778e-05	2.20166e-05	1.97084e-05
5.275	1.28428e-05	1.97165e-05	2.1781e-05	1.94325e-05
5.27667	1.27121e-05	1.96191e-05	2.15276e-05	1.91369e-05
5.27833	1.25782e-05	1.94974e-05	2.1275e-05	1.88502e-05
5.28	1.24716e-05	1.93666e-05	2.10347e-05	1.85842e-05
5.28167	1.23909e-05	1.92332e-05	2.07954e-05	1.8332e-05
5.28333	1.23161e-05	1.90997e-05	2.05476e-05	1.80827e-05
5.285	1.2226e-05	1.89564e-05	2.02922e-05	1.78285e-05
5.28667	1.21358e-05	1.88058e-05	2.00453e-05	1.7594e-05
5.28833	1.2047e-05	1.86345e-05	1.98078e-05	1.73782e-05
5.29	1.19588e-05	1.84325e-05	1.9576e-05	1.71644e-05
5.29167	1.18591e-05	1.8208e-05	1.9347e-05	1.69446e-05
5.29333	1.17532e-05	1.79934e-05	1.91208e-05	1.6721e-05
5.295	1.16529e-05	1.78032e-05	1.88994e-05	1.65023e-05
5.29667	1.15488e-05	1.76093e-05	1.86817e-05	1.62904e-05
5.29833	1.14384e-05	1.73884e-05	1.84735e-05	1.60914e-05
5.3	1.13222e-05	1.7135e-05	1.82784e-05	1.59071e-05
5.30167	1.12112e-05	1.68627e-05	1.81107e-05	1.57337e-05
5.30333	1.11052e-05	1.65778e-05	1.79722e-05	1.55623e-05
5.305	1.09979e-05	1.63001e-05	1.78412e-05	1.53938e-05
5.30667	1.08983e-05	1.60467e-05	1.76979e-05	1.52391e-05
5.30833	1.08126e-05	1.58132e-05	1.75358e-05	1.51051e-05
5.31	1.07276e-05	1.55752e-05	1.73615e-05	1.4978e-05
5.31167	1.06286e-05	1.5311e-05	1.71787e-05	1.4841e-05
5.31333	1.05112e-05	1.50378e-05	1.69959e-05	1.46893e-05
5.315	1.03951e-05	1.47736e-05	1.68235e-05	1.45238e-05
5.31667	1.02986e-05	1.45319e-05	1.66698e-05	1.43582e-05
5.31833	1.02091e-05	1.43002e-05	1.65285e-05	1.41986e-05
5.32	1.01171e-05	1.40658e-05	1.63994e-05	1.40607e-05
5.32167	1.00168e-05	1.38241e-05	1.63014e-05	1.39523e-05
5.32333	9.90896e-06	1.35708e-05	1.62383e-05	1.38538e-05
5.325	9.79852e-06	1.33219e-05	1.6194e-05	1.37414e-05
5.32667	9.6843e-06	1.30866e-05	1.61374e-05	1.36084e-05
5.32833	9.57386e-06	1.28675e-05	1.60564e-05	1.34784e-05
[truncated: 4,302 more rows]

## Sheet: Fig2B
Cell	Guides	Green fluorescence	Red fluorescence	Diameter after shock	Length after shock	Diameter before shock	Length before shock
1	G14-R20	318.64	175.16	0.945555	2.63178	0.914355	2.5038
12	GØ-RØ	810.99	1150	0.96603	3.17044	0.93951	2.92266
13	GØ-RØ	720.81	1314.8	0.97682	2.42424	0.97786	2.35508
14	GØ-RØ	865.49	1154	0.976495	2.72389	0.973895	2.63081
15	G14-R20	323.9	182.4	0.926055	2.80696	0.90181	2.58791
16	G14-R20	296.69	174.36	0.914485	2.24972	0.866905	2.08559
17	G14-R20	336.67	179.57	0.997425	2.05933	0.974415	1.94903
18	G14-R20	324.75	181.42	0.894985	2.19928	0.8658	1.99804
19	G14-R20	358.49	188.29	0.945165	1.92393	0.949975	1.85549
2	G14-R20	296.85	182.5	0.929695	2.686	0.916955	2.61339
20	GØ-RØ	719.6	878.39	0.94159	2.17887	0.92482	2.04646
21	G14-R20	312.17	183.07	0.93561	1.76585	0.901355	1.61486
22	G14-R20	324	180.36	1.00802	2.03509	0.981565	1.93017
23	GØ-RØ	808.56	1249.9	1.0062	2.33935	0.97955	2.23184
25	GØ-RØ	708.43	1151.3	0.96382	2.01747	0.962715	1.90963
28	G14-R20	272.55	172.71	0.96616	2.83569	0.915135	2.61814
3	G14-R20	308.92	196.2	0.9555	2.44576	0.90194	2.24913
31	GØ-RØ	886.65	1096.4	0.988585	2.63029	0.965185	2.44361
32	G14-R20	324.86	172.29	0.947115	2.01812	0.913705	1.87505
33	G14-R20	354.89	184.25	0.9048	2.49789	0.874965	2.29814
34	GØ-RØ	844.07	1920.7	1.02726	2.44303	1.00782	2.27727
35	GØ-RØ	736.57	991.51	1.0023	1.93401	0.997425	1.85685
36	G14-R20	322.9	185.83	0.92222	2.45277	0.87074	2.29814
37	G14-R20	324.27	189.23	0.861185	2.03684	0.816725	1.9149
38	G14-R20	329.33	189.05	0.929305	2.3244	0.884455	2.15111
39	G14-R20	384.26	183.6	0.899957	1.67365	0.88075	1.63452
40	GØ-RØ	824.27	1260.3	1.01179	2.91323	1.02089	2.84836
41	G14-R20	328.71	187.23	0.94315	1.99544	0.91338	1.8343
43	GØ-RØ	702.97	934.48	1.01744	2.25816	0.993395	2.11926
45	G14-R20	334.29	180.22	0.913835	1.6382	0.881855	1.54512
46	GØ-RØ	648.99	803.03	0.949065	2.88854	0.959985	2.82873
47	G14-R20	335	197.32	0.892255	2.40987	0.901745	2.37478
48	G14-R20	337.69	191.97	0.92716	2.5519	0.906295	2.39831
49	G14-R20	328.54	175.15	0.936195	1.97145	0.894855	1.7901
5	GØ-RØ	856.4	1166.6	0.933465	2.09931	0.9074	1.90366
52	G14-R20	325.73	193.55	0.87178	1.65334	0.8541	1.48246
53	G14-R20	311.34	191.66	0.9659	1.65081	0.94029	1.49838
56	GØ-RØ	738.98	1424.5	1.02206	2.49152	1.02557	2.43497
59	GØ-RØ	636.82	1277.5	1.03038	2.5064	1.00152	2.35352
6	G14-R20	299.26	199.75	0.910455	3.77533	0.883025	3.54595
60	GØ-RØ	910	1558.2	1.00672	1.98789	1.00523	1.93876
61	GØ-RØ	633.11	963.43	1.00334	2.51576	0.993525	2.42509
62	G14-R20	316.17	183.91	0.92729	1.72062	0.909155	1.61395
63	GØ-RØ	735.5	1450.4	1.04591	2.86143	1.03532	2.72415
64	G14-R20	316.3	181.11	0.8892	1.52588	0.854295	1.37105
65	GØ-RØ	732.3	1305.1	1.03695	2.23587	1.02739	2.14773
66	GØ-RØ	676.01	918.56	0.966615	1.92335	0.96213	1.85549
68	G14-R20	324.85	186.78	0.945555	2.21591	0.93223	2.09131
69	G14-R20	291.54	193.94	0.958035	1.85894	0.951925	1.68213
7	GØ-RØ	785.3	1258.8	0.986765	2.57296	0.95446	2.38036
70	GØ-RØ	736.59	1259.6	0.953908	3.41263	0.94419	3.29323
73	G14-R20	329.34	194.33	0.89518	3.20782	0.862615	3.00385
78	G14-R20	339.61	184.73	0.93028	3.45017	0.899015	3.36863
8	G14-R20	407.17	175.71	0.964015	2.01955	0.939965	1.92556
9	G14-R20	293.65	187.52	0.95381	2.92084	0.925015	2.71082

## Sheet: Fig2B_raw_cells
Cell	Green fluorescence	Red fluorescence	Diameter	Length	Focus	Concavity	Motion	X position	Y position
1	318.64	175.16	0.91325	2.50569	0.43586	3.3297	0.652611	97.452	995.64
1	318.64	175.16	0.921765	2.58433	0.39077	3.3297	0.652611	96.522	995.03
1	318.64	175.16	0.929955	2.57205	0.38276	3.3297	0.652611	97.073	995
1	318.64	175.16	0.919685	2.57445	0.38163	3.3297	0.652611	96.698	995.15
1	318.64	175.16	0.9165	2.51056	0.41242	3.3297	0.652611	97.724	996.2
1	318.64	175.16	0.92274	2.57836	0.37854	3.3297	0.652611	96.608	995.37
1	318.64	175.16	0.913965	2.50289	0.41843	3.3297	0.652611	97.681	995.67
1	318.64	175.16	0.922805	2.57764	0.37679	3.3297	0.652611	96.683	995.26
1	318.64	175.16	0.92053	2.57218	0.38508	3.3297	0.652611	96.75	995.16
1	318.64	175.16	0.9178	2.57283	0.37686	3.3297	0.652611	96.667	995.19
1	318.64	175.16	0.92456	2.5742	0.39264	3.3297	0.652611	97.169	995.09
1	318.64	175.16	0.91949	2.574	0.38405	3.3297	0.652611	97.186	995.04
1	318.64	175.16	0.92209	2.57043	0.38667	3.3297	0.652611	96.672	995.15
1	318.64	175.16	0.9217	2.57056	0.38461	3.3297	0.652611	96.938	995.02
1	318.64	175.16	0.92079	2.57627	0.38482	3.3297	0.652611	96.699	995.05
1	318.64	175.16	0.914355	2.50562	0.42255	3.3297	0.652611	97.696	995.78
1	318.64	175.16	0.924495	2.58082	0.38023	3.3297	0.652611	96.92	995.15
1	318.64	175.16	0.92287	2.57374	0.39051	3.3297	0.652611	96.959	995.01
1	318.64	175.16	0.92469	2.57023	0.39034	3.3297	0.652611	97.103	994.98
1	318.64	175.16	0.912535	2.50627	0.43727	3.3297	0.652611	97.541	995.83
1	318.64	175.16	0.926185	2.57706	0.37857	3.3297	0.652611	96.085	995.24
1	318.64	175.16	0.927355	2.57563	0.39281	3.3297	0.652611	96.996	995.05
1	318.64	175.16	0.915525	2.50237	0.42461	3.3297	0.652611	97.596	995.76
1	318.64	175.16	0.928005	2.59584	0.37421	3.3297	0.652611	97.493	995.39
1	318.64	175.16	0.932815	2.61098	0.37484	3.3297	0.652611	97.646	995.61
1	318.64	175.16	0.91442	2.49106	0.40747	3.3297	0.652611	97.855	995.98
1	318.64	175.16	0.92573	2.57179	0.39544	3.3297	0.652611	97.079	994.89
1	318.64	175.16	0.92066	2.50061	0.41054	3.3297	0.652611	97.316	995.87
1	318.64	175.16	0.932425	2.61625	0.39574	3.3297	0.652611	97.261	995.86
1	318.64	175.16	0.91208	2.50452	0.42912	3.3297	0.652611	97.578	996.02
1	318.64	175.16	0.91663	2.50413	0.42479	3.3297	0.652611	97.36	995.66
1	318.64	175.16	0.92378	2.57244	0.38498	3.3297	0.652611	96.752	994.93
1	318.64	175.16	0.90701	2.5064	0.4299	3.3297	0.652611	97.603	995.59
1	318.64	175.16	0.918905	2.58056	0.38403	3.3297	0.652611	96.406	995.15
1	318.64	175.16	0.920205	2.58206	0.391	3.3297	0.652611	96.541	994.85
1	318.64	175.16	0.91299	2.5025	0.43638	3.3297	0.652611	97.497	996.04
1	318.64	175.16	0.919165	2.5855	0.39217	3.3297	0.652611	96.544	994.9
1	318.64	175.16	0.922675	2.5844	0.38585	3.3297	0.652611	96.351	995.1
1	318.64	175.16	0.92014	2.57862	0.38315	3.3297	0.652611	96.73	995.04
1	318.64	175.16	0.92547	2.57394	0.38184	3.3297	0.652611	96.713	995.07
1	318.64	175.16	0.91507	2.50549	0.42215	3.3297	0.652611	97.784	995.69
1	318.64	175.16	0.917865	2.58375	0.38587	3.3297	0.652611	96.463	995.04
1	318.64	175.16	0.919555	2.58596	0.38412	3.3297	0.652611	96.327	995.21
1	318.64	175.16	0.917865	2.58108	0.39265	3.3297	0.652611	96.293	995.02
1	318.64	175.16	0.924625	2.57088	0.3955	3.3297	0.652611	97	995
1	318.64	175.16	0.917995	2.58206	0.39276	3.3297	0.652611	96.881	994.82
1	318.64	175.16	0.91442	2.58525	0.39298	3.3297	0.652611	96.82	994.74
1	318.64	175.16	0.91962	2.58232	0.38626	3.3297	0.652611	96.632	995.18
1	318.64	175.16	0.923455	2.56913	0.38363	3.3297	0.652611	96.704	995.18
1	318.64	175.16	0.918515	2.57608	0.37697	3.3297	0.652611	96.38	995.38
1	318.64	175.16	0.915395	2.56041	0.37941	3.3297	0.652611	96.47	995.2
1	318.64	175.16	0.92014	2.58134	0.3835	3.3297	0.652611	96.439	995.26
1	318.64	175.16	0.922415	2.57218	0.39595	3.3297	0.652611	96.993	995.01
1	318.64	175.16	0.915395	2.50328	0.43418	3.3297	0.652611	97.47	995.92
1	318.64	175.16	0.921895	2.57394	0.37711	3.3297	0.652611	96.533	995.17
1	318.64	175.16	0.92001	2.57524	0.37321	3.3297	0.652611	96.716	995.23
1	318.64	175.16	0.920855	2.57764	0.38066	3.3297	0.652611	96.647	995.2
1	318.64	175.16	0.917215	2.50672	0.42828	3.3297	0.652611	97.612	995.69
1	318.64	175.16	0.920985	2.57686	0.37633	3.3297	0.652611	96.822	995.27
1	318.64	175.16	0.918905	2.56964	0.38651	3.3297	0.652611	97.022	995.28
1	318.64	175.16	0.922675	2.57238	0.38177	3.3297	0.652611	96.594	995.23
1	318.64	175.16	0.926575	2.57257	0.39137	3.3297	0.652611	96.919	995.03
1	318.64	175.16	0.91949	2.5753	0.38078	3.3297	0.652611	96.978	995.08
1	318.64	175.16	0.926315	2.58082	0.38089	3.3297	0.652611	96.959	995.24
1	318.64	175.16	0.9152	2.50529	0.43349	3.3297	0.652611	97.971	996.22
1	318.64	175.16	0.915395	2.50224	0.4244	3.3297	0.652611	97.566	995.79
1	318.64	175.16	0.91962	2.56964	0.40479	3.3297	0.652611	96.657	995.35
1	318.64	175.16	0.923715	2.57829	0.38091	3.3297	0.652611	96.952	995.18
1	318.64	175.16	0.92573	2.57556	0.3901	3.3297	0.652611	97.251	995.01
1	318.64	175.16	0.92027	2.57517	0.38042	3.3297	0.652611	97.384	995.05
1	318.64	175.16	0.914225	2.50296	0.41204	3.3297	0.652611	97.817	995.9
1	318.64	175.16	0.920985	2.57959	0.40032	3.3297	0.652611	96.31	995.54
1	318.64	175.16	0.922025	2.5768	0.38998	3.3297	0.652611	97.573	995.04
1	318.64	175.16	0.90662	2.54215	0.39109	3.3297	0.652611	95.837	995.94
1	318.64	175.16	0.922025	2.57082	0.38094	3.3297	0.652611	96.644	995.33
1	318.64	175.16	0.9308	2.59922	0.39155	3.3297	0.652611	97.063	995.99
1	318.64	175.16	0.91416	2.50445	0.44094	3.3297	0.652611	97.469	995.97
1	318.64	175.16	0.91455	2.51063	0.43095	3.3297	0.652611	97.588	995.84
1	318.64	175.16	0.913705	2.50224	0.40509	3.3297	0.652611	97.371	995.92
1	318.64	175.16	0.929175	2.57439	0.39572	3.3297	0.652611	97.002	994.98
1	318.64	175.16	0.91949	2.57264	0.38004	3.3297	0.652611	96.526	995.22
1	318.64	175.16	0.91715	2.50582	0.41269	3.3297	0.652611	98.184	996.07
1	318.64	175.16	0.92313	2.57719	0.38235	3.3297	0.652611	96.866	995.24
1	318.64	175.16	0.914615	2.50022	0.44005	3.3297	0.652611	97.728	995.93
1	318.64	175.16	0.92066	2.57185	0.37939	3.3297	0.652611	96.749	995.18
1	318.64	175.16	0.921245	2.57465	0.3771	3.3297	0.652611	96.812	995.21
1	318.64	175.16	0.921375	2.57751	0.37684	3.3297	0.652611	96.623	995.21
1	318.64	175.16	0.928525	2.57348	0.38339	3.3297	0.652611	96.948	995.12
1	318.64	175.16	0.920595	2.57368	0.38127	3.3297	0.652611	96.935	995.22
1	318.64	175.16	0.923	2.57862	0.38738	3.3297	0.652611	97.121	994.94
1	318.64	175.16	0.92222	2.57608	0.38765	3.3297	0.652611	96.983	995.12
1	318.64	175.16	0.92027	2.57381	0.38303	3.3297	0.652611	96.803	995.15
1	318.64	175.16	0.9165	2.50244	0.41262	3.3297	0.652611	97.245	995.81
1	318.64	175.16	0.922545	2.57504	0.37745	3.3297	0.652611	96.915	995.24
1	318.64	175.16	0.924235	2.57595	0.38612	3.3297	0.652611	97.156	994.99
1	318.64	175.16	0.924625	2.5649	0.38969	3.3297	0.652611	97.041	995.11
1	318.64	175.16	0.929175	2.56438	0.37154	3.3297	0.652611	96.134	994.52
1	318.64	175.16	0.92196	2.57387	0.38037	3.3297	0.652611	97.071	995.12
1	318.64	175.16	0.923	2.57413	0.37784	3.3297	0.652611	96.823	995.35
1	318.64	175.16	0.912665	2.5025	0.42361	3.3297	0.652611	97.326	995.62
1	318.64	175.16	0.931645	2.59993	0.39818	3.3297	0.652611	97.356	995.65
1	318.64	175.16	0.93483	2.60598	0.39792	3.3297	0.652611	97.678	995.43
1	318.64	175.16	0.915915	2.50556	0.41392	3.3297	0.652611	97.612	995.9
1	318.64	175.16	0.915525	2.57504	0.38845	3.3297	0.652611	97.296	995.09
1	318.64	175.16	0.9139	2.50302	0.44535	3.3297	0.652611	97.893	996.01
1	318.64	175.16	0.937365	2.61436	0.3946	3.3297	0.652611	97.137	995.74
1	318.64	175.16	0.9126	2.50211	0.42968	3.3297	0.652611	96.251	996.61
1	318.64	175.16	0.91806	2.50757	0.4043	3.3297	0.652611	97.401	995.91
1	318.64	175.16	0.919945	2.57276	0.38247	3.3297	0.652611	96.472	995.24
1	318.64	175.16	0.913705	2.5038	0.42332	3.3297	0.652611	97.504	995.97
1	318.64	175.16	0.92326	2.58473	0.38596	3.3297	0.652611	96.169	995.26
1	318.64	175.16	0.919425	2.58082	0.3907	3.3297	0.652611	96.272	995.01
1	318.64	175.16	0.91546	2.51037	0.42949	3.3297	0.652611	98	995.54
1	318.64	175.16	0.92131	2.58362	0.3867	3.3297	0.652611	96.253	995
1	318.64	175.16	0.916045	2.5831	0.38646	3.3297	0.652611	96.526	995.01
1	318.64	175.16	0.916695	2.58317	0.38755	3.3297	0.652611	96.764	995.12
1	318.64	175.16	0.919295	2.57394	0.38047	3.3297	0.652611	96.543	995.23
1	318.64	175.16	0.91351	2.5012	0.41835	3.3297	0.652611	97.632	995.82
1	318.64	175.16	0.920205	2.58011	0.38742	3.3297	0.652611	96.528	995.23
1	318.64	175.16	0.91806	2.58473	0.38585	3.3297	0.652611	96.71	994.98
1	318.64	175.16	0.92027	2.57471	0.38195	3.3297	0.652611	96.51	995.26
1	318.64	175.16	0.92053	2.58557	0.38432	3.3297	0.652611	96.69	994.88
1	318.64	175.16	0.91754	2.58076	0.38896	3.3297	0.652611	96.751	994.76
1	318.64	175.16	0.91598	2.58388	0.39373	3.3297	0.652611	97.064	994.78
1	318.64	175.16	0.915655	2.57894	0.38594	3.3297	0.652611	96.825	995.04
1	318.64	175.16	0.925795	2.58031	0.38783	3.3297	0.652611	97.022	994.93
1	318.64	175.16	0.923	2.57796	0.38189	3.3297	0.652611	96.433	995.27
1	318.64	175.16	0.916305	2.57816	0.37944	3.3297	0.652611	96.936	995.34
1	318.64	175.16	0.919555	2.57426	0.38209	3.3297	0.652611	96.571	995.27
1	318.64	175.16	0.91897	2.58681	0.38258	3.3297	0.652611	96.059	995.1
1	318.64	175.16	0.920595	2.57946	0.39372	3.3297	0.652611	96.672	994.85
1	318.64	175.16	0.924105	2.57133	0.37998	3.3297	0.652611	96.781	995.39
1	318.64	175.16	0.923455	2.57387	0.38137	3.3297	0.652611	96.837	995.12
1	318.64	175.16	0.92716	2.57407	0.37995	3.3297	0.652611	97.142	995.13
1	318.64	175.16	0.920985	2.58018	0.37117	3.3297	0.652611	96.689	994.73
1	318.64	175.16	0.92456	2.57218	0.38276	3.3297	0.652611	96.831	995.1
1	318.64	175.16	0.922285	2.56685	0.38362	3.3297	0.652611	96.965	995.21
1	318.64	175.16	0.91975	2.57231	0.38417	3.3297	0.652611	96.798	995.19
1	318.64	175.16	0.923715	2.58258	0.38666	3.3297	0.652611	96.732	995.01
1	318.64	175.16	0.923325	2.57003	0.38493	3.3297	0.652611	96.971	995.2
1	318.64	175.16	0.92287	2.57159	0.37903	3.3297	0.652611	97.284	995.16
1	318.64	175.16	0.91221	2.50354	0.43403	3.3297	0.652611	98.063	996.1
1	318.64	175.16	0.9152	2.58381	0.39054	3.3297	0.652611	96.732	994.97
1	318.64	175.16	0.92456	2.57296	0.38073	3.3297	0.652611	96.683	995.34
1	318.64	175.16	0.92365	2.57244	0.38172	3.3297	0.652611	97.356	995.06
1	318.64	175.16	0.922155	2.57309	0.39549	3.3297	0.652611	97.093	995.04
1	318.64	175.16	0.919815	2.58655	0.38623	3.3297	0.652611	96.46	995.12
1	318.64	175.16	0.920985	2.57309	0.37901	3.3297	0.652611	96.891	995.11
1	318.64	175.16	0.92469	2.57855	0.37996	3.3297	0.652611	96.396	995.31
1	318.64	175.16	0.92313	2.57432	0.38012	3.3297	0.652611	96.964	995.15
1	318.64	175.16	0.909285	2.54566	0.374	3.3297	0.652611	95.538	996.39
1	318.64	175.16	0.919945	2.58622	0.391	3.3297	0.652611	96.649	995.08
1	318.64	175.16	0.93392	2.61307	0.38145	3.3297	0.652611	96.961	996.36
1	318.64	175.16	0.9113	2.504	0.41446	3.3297	0.652611	97.939	995.87
1	318.64	175.16	0.91416	2.50751	0.43026	3.3297	0.652611	97.73	995.87
1	318.64	175.16	0.922025	2.57653	0.37878	3.3297	0.652611	96.575	995.24
1	318.64	175.16	0.92651	2.574	0.39535	3.3297	0.652611	97.245	994.92
1	318.64	175.16	0.920465	2.57875	0.38322	3.3297	0.652611	96.801	995.34
1	318.64	175.16	0.915525	2.50465	0.41167	3.3297	0.652611	98.087	995.96
1	318.64	175.16	0.92053	2.58161	0.38938	3.3297	0.652611	96.866	994.81
1	318.64	175.16	0.923975	2.57478	0.38792	3.3297	0.652611	97.317	995.02
1	318.64	175.16	0.92313	2.56854	0.37627	3.3297	0.652611	96.616	995.18
1	318.64	175.16	0.92248	2.57524	0.37822	3.3297	0.652611	96.583	995.14
1	318.64	175.16	0.918645	2.57231	0.38277	3.3297	0.652611	97	995.28
1	318.64	175.16	0.918645	2.58037	0.38511	3.3297	0.652611	96.261	995.11
1	318.64	175.16	0.92196	2.56945	0.37908	3.3297	0.652611	96.762	995.22
1	318.64	175.16	0.920335	2.5714	0.38731	3.3297	0.652611	96.98	995.21
1	318.64	175.16	0.92209	2.57225	0.38298	3.3297	0.652611	96.625	995.15
1	318.64	175.16	0.92183	2.58323	0.38017	3.3297	0.652611	97.192	995.22
1	318.64	175.16	0.91416	2.49808	0.41737	3.3297	0.652611	97.757	995.84
1	318.64	175.16	0.91572	2.50861	0.43529	3.3297	0.652611	97.727	996.02
1	318.64	175.16	0.92547	2.57952	0.3869	3.3297	0.652611	97.086	995.14
1	318.64	175.16	0.922545	2.57101	0.38107	3.3297	0.652611	97.002	995.21
1	318.64	175.16	0.9217	2.58336	0.38714	3.3297	0.652611	96.479	994.89
1	318.64	175.16	0.929045	2.58148	0.38757	3.3297	0.652611	95.768	994.98
1	318.64	175.16	0.925795	2.57374	0.38178	3.3297	0.652611	97.015	995.05
1	318.64	175.16	0.92196	2.57452	0.38187	3.3297	0.652611	97.321	995.13
1	318.64	175.16	0.9178	2.57829	0.39238	3.3297	0.652611	96.586	995.03
1	318.64	175.16	0.928395	2.60143	0.37643	3.3297	0.652611	97.156	995.29
1	318.64	175.16	0.93197	2.61066	0.39731	3.3297	0.652611	97.515	995.69
1	318.64	175.16	0.91156	2.5027	0.42422	3.3297	0.652611	97.579	996.07
1	318.64	175.16	0.918905	2.58095	0.38118	3.3297	0.652611	96.168	995.26
1	318.64	175.16	0.91559	2.5036	0.43967	3.3297	0.652611	97.841	995.89
1	318.64	175.16	0.93613	2.61911	0.3916	3.3297	0.652611	97.317	995.91
1	318.64	175.16	0.906815	2.48066	0.42403	3.3297	0.652611	96.025	996.58
1	318.64	175.16	0.917605	2.57283	0.38399	3.3297	0.652611	96.711	995.21
1	318.64	175.16	0.919815	2.5768	0.39515	3.3297	0.652611	96.767	994.8
1	318.64	175.16	0.912145	2.49255	0.44057	3.3297	0.652611	97.817	995.91
1	318.64	175.16	0.9217	2.58082	0.37884	3.3297	0.652611	96.453	995.18
1	318.64	175.16	0.92014	2.58648	0.38573	3.3297	0.652611	96.4	995.01
1	318.64	175.16	0.92456	2.56665	0.38125	3.3297	0.652611	96.698	995.09
1	318.64	175.16	0.92391	2.58882	0.3971	3.3297	0.652611	96.5	994.95
1	318.64	175.16	0.918515	2.58304	0.38476	3.3297	0.652611	96.496	995.13
1	318.64	175.16	0.91936	2.5855	0.38473	3.3297	0.652611	96.561	995.06
1	318.64	175.16	0.917735	2.5792	0.38366	3.3297	0.652611	96.905	994.88
1	318.64	175.16	0.909805	2.49216	0.42777	3.3297	0.652611	97.358	995.71
1	318.64	175.16	0.921765	2.5833	0.38834	3.3297	0.652611	96.776	994.96
1	318.64	175.16	0.91858	2.58589	0.39155	3.3297	0.652611	96.629	994.98
1	318.64	175.16	0.91845	2.57348	0.38219	3.3297	0.652611	96.877	995.11
1	318.64	175.16	0.92092	2.582	0.37611	3.3297	0.652611	96.486	995.18
1	318.64	175.16	0.920205	2.58102	0.3929	3.3297	0.652611	96.781	994.92
1	318.64	175.16	0.917475	2.58167	0.39356	3.3297	0.652611	96.614	994.78
1	318.64	175.16	0.919945	2.58271	0.38512	3.3297	0.652611	96.942	995.04
1	318.64	175.16	0.903955	2.54196	0.34411	3.3297	0.652611	99.862	994.06
1	318.64	175.16	0.920205	2.57783	0.39057	3.3297	0.652611	96.549	995.2
1	318.64	175.16	0.91962	2.57458	0.37764	3.3297	0.652611	96.77	995.27
1	318.64	175.16	0.92183	2.57458	0.38267	3.3297	0.652611	96.659	995.14
1	318.64	175.16	0.923	2.58837	0.39108	3.3297	0.652611	96.161	994.87
1	318.64	175.16	0.916175	2.58739	0.39163	3.3297	0.652611	96.589	994.96
1	318.64	175.16	0.921375	2.57231	0.37663	3.3297	0.652611	96.477	995.29
1	318.64	175.16	0.921765	2.57653	0.38296	3.3297	0.652611	96.535	995.22
1	318.64	175.16	0.926315	2.57667	0.38952	3.3297	0.652611	97.317	995.04
1	318.64	175.16	0.915915	2.58284	0.39489	3.3297	0.652611	96.824	994.82
1	318.64	175.16	0.92144	2.57712	0.37415	3.3297	0.652611	96.737	995.27
1	318.64	175.16	0.92209	2.57146	0.38741	3.3297	0.652611	96.812	995.09
1	318.64	175.16	0.923065	2.57127	0.38151	3.3297	0.652611	96.886	995.24
1	318.64	175.16	0.919815	2.58082	0.38293	3.3297	0.652611	96.188	994.99
1	318.64	175.16	0.920985	2.57309	0.37958	3.3297	0.652611	96.877	995.18
1	318.64	175.16	0.9256	2.57107	0.3818	3.3297	0.652611	97.026	995.09
1	318.64	175.16	0.925405	2.56939	0.37999	3.3297	0.652611	96.916	995.27
1	318.64	175.16	0.916175	2.58492	0.39048	3.3297	0.652611	96.722	994.92
1	318.64	175.16	0.920725	2.57614	0.37754	3.3297	0.652611	96.807	995.43
1	318.64	175.16	0.922675	2.57205	0.38752	3.3297	0.652611	97.084	995.01
1	318.64	175.16	0.922545	2.57478	0.38205	3.3297	0.652611	97.079	995.03
1	318.64	175.16	0.92222	2.58648	0.38467	3.3297	0.652611	96.353	995.07
1	318.64	175.16	0.919685	2.57744	0.37665	3.3297	0.652611	96.716	995.26
1	318.64	175.16	0.92391	2.55509	0.38852	3.3297	0.652611	96.431	994.79
1	318.64	175.16	0.922025	2.57608	0.39203	3.3297	0.652611	96.928	995.03
1	318.64	175.16	0.915395	2.58414	0.36801	3.3297	0.652611	96.866	995.47
1	318.64	175.16	0.921505	2.57809	0.39347	3.3297	0.652611	96.869	994.93
1	318.64	175.16	0.933595	2.60702	0.37585	3.3297	0.652611	97.117	995.72
1	318.64	175.16	0.915265	2.50075	0.41578	3.3297	0.652611	97.806	995.88
1	318.64	175.16	0.91585	2.50601	0.40897	3.3297	0.652611	97.592	995.8
1	318.64	175.16	0.919555	2.57608	0.38297	3.3297	0.652611	96.74	995.15
1	318.64	175.16	0.92586	2.57563	0.39166	3.3297	0.652611	97.059	994.99
1	318.64	175.16	0.91819	2.57816	0.37784	3.3297	0.652611	96.495	995.22
1	318.64	175.16	0.915395	2.50861	0.43326	3.3297	0.652611	97.372	996.31
1	318.64	175.16	0.92001	2.58499	0.38729	3.3297	0.652611	96.762	995.09
1	318.64	175.16	0.927095	2.57394	0.38513	3.3297	0.652611	97.092	994.95
1	318.64	175.16	0.92235	2.57946	0.38365	3.3297	0.652611	96.576	995.13
1	318.64	175.16	0.916695	2.57368	0.37974	3.3297	0.652611	96.81	995.27
1	318.64	175.16	0.91871	2.57082	0.38512	3.3297	0.652611	96.448	995.17
1	318.64	175.16	0.912275	2.50958	0.43241	3.3297	0.652611	97.67	995.97
1	318.64	175.16	0.92625	2.57634	0.38189	3.3297	0.652611	96.97	995.13
1	318.64	175.16	0.92248	2.57413	0.38713	3.3297	0.652611	96.617	995.04
1	318.64	175.16	0.924885	2.56926	0.38312	3.3297	0.652611	97.292	995.31
1	318.64	175.16	0.91897	2.58381	0.38902	3.3297	0.652611	96.732	994.99
1	318.64	175.16	0.91936	2.57238	0.37581	3.3297	0.652611	96.66	995.28
1	318.64	175.16	0.911625	2.51147	0.43926	3.3297	0.652611	97.67	996.07
1	318.64	175.16	0.922545	2.55769	0.39572	3.3297	0.652611	96.849	995.05
1	318.64	175.16	0.91468	2.49717	0.41907	3.3297	0.652611	98.052	995.59
1	318.64	175.16	0.92196	2.57511	0.38324	3.3297	0.652611	96.835	995.15
1	318.64	175.16	0.92911	2.57979	0.37136	3.3297	0.652611	96.045	994.5
1	318.64	175.16	0.92157	2.58225	0.38551	3.3297	0.652611	96.644	994.88
1	318.64	175.16	0.918255	2.57693	0.38743	3.3297	0.652611	96.871	995.17
1	318.64	175.16	0.92599	2.58967	0.36527	3.3297	0.652611	96.978	995.49
1	318.64	175.16	0.93483	2.6065	0.36969	3.3297	0.652611	97.543	995.53
1	318.64	175.16	0.913445	2.50419	0.43486	3.3297	0.652611	97.473	996.15
1	318.64	175.16	0.920855	2.57511	0.38516	3.3297	0.652611	96.59	995.16
1	318.64	175.16	0.92651	2.57445	0.38531	3.3297	0.652611	96.815	995.13
1	318.64	175.16	0.932035	2.61931	0.37608	3.3297	0.652611	97.863	995.59
1	318.64	175.16	0.911885	2.48021	0.43379	3.3297	0.652611	95.746	996.12
1	318.64	175.16	0.918905	2.58609	0.3896	3.3297	0.652611	96.454	994.98
1	318.64	175.16	0.92807	2.57894	0.38398	3.3297	0.652611	96.183	995.28
1	318.64	175.16	0.91689	2.50439	0.42853	3.3297	0.652611	97.68	995.8
1	318.64	175.16	0.920075	2.58076	0.38242	3.3297	0.652611	96.646	995.23
1	318.64	175.16	0.921505	2.57601	0.38255	3.3297	0.652611	96.644	995.25
1	318.64	175.16	0.932555	2.60598	0.37282	3.3297	0.652611	97.312	995.52
1	318.64	175.16	0.92105	2.582	0.39146	3.3297	0.652611	96.91	994.94
1	318.64	175.16	0.919815	2.58492	0.39643	3.3297	0.652611	96.57	994.93
1	318.64	175.16	0.91936	2.57979	0.38393	3.3297	0.652611	96.462	995.13
1	318.64	175.16	0.92352	2.57576	0.38745	3.3297	0.652611	96.982	995.11
1	318.64	175.16	0.923845	2.57355	0.37979	3.3297	0.652611	96.453	995.19
1	318.64	175.16	0.9165	2.57992	0.38702	3.3297	0.652611	96.824	995
1	318.64	175.16	0.9178	2.58115	0.39086	3.3297	0.652611	96.499	995.06
1	318.64	175.16	0.9243	2.57394	0.38494	3.3297	0.652611	96.7	995.11
1	318.64	175.16	0.924365	2.57601	0.38177	3.3297	0.652611	96.907	995.12
1	318.64	175.16	0.917995	2.58661	0.3972	3.3297	0.652611	96.57	994.71
1	318.64	175.16	0.919035	2.58433	0.39053	3.3297	0.652611	96.409	994.88
1	318.64	175.16	0.923845	2.56939	0.38368	3.3297	0.652611	97.091	995.19
1	318.64	175.16	0.92508	2.57218	0.3843	3.3297	0.652611	96.818	995.32
1	318.64	175.16	0.91845	2.57146	0.38306	3.3297	0.652611	96.343	995.28
1	318.64	175.16	0.92352	2.57497	0.38456	3.3297	0.652611	96.653	995.22
1	318.64	175.16	0.924365	2.56971	0.38411	3.3297	0.652611	96.559	995.22
1	318.64	175.16	0.913705	2.50751	0.43501	3.3297	0.652611	97.896	995.99
1	318.64	175.16	0.914745	2.50315	0.4392	3.3297	0.652611	97.938	996.08
1	318.64	175.16	0.925015	2.57712	0.39609	3.3297	0.652611	97.14	994.99
1	318.64	175.16	0.922155	2.56958	0.3797	3.3297	0.652611	96.507	995.3
1	318.64	175.16	0.917995	2.5831	0.38976	3.3297	0.652611	96.382	994.99
1	318.64	175.16	0.929565	2.58187	0.3781	3.3297	0.652611	96.331	995.18
1	318.64	175.16	0.92274	2.59707	0.36113	3.3297	0.652611	97.02	995.26
1	318.64	175.16	0.924625	2.57413	0.37807	3.3297	0.652611	96.91	995.16
1	318.64	175.16	0.913055	2.50477	0.43469	3.3297	0.652611	97.312	996.19
1	318.64	175.16	0.904865	2.56184	0.3433	3.3297	0.652611	96.032	996.37
1	318.64	175.16	0.933335	2.60799	0.3953	3.3297	0.652611	97.155	995.73
1	318.64	175.16	0.922155	2.57199	0.38679	3.3297	0.652611	96.859	995.12
1	318.64	175.16	0.92274	2.57199	0.38144	3.3297	0.652611	96.903	995.22
1	318.64	175.16	0.921505	2.58401	0.38948	3.3297	0.652611	96.429	994.88
1	318.64	175.16	0.92469	2.59967	0.3796	3.3297	0.652611	97.955	995.45
1	318.64	175.16	0.945555	2.56451	0.39229	3.3297	0.652611	96.371	995.46
1	318.64	175.16	0.927875	2.57114	0.39499	3.3297	0.652611	97.168	994.89
1	318.64	175.16	0.922545	2.57257	0.37605	3.3297	0.652611	96.726	995.24
1	318.64	175.16	0.91702	2.5077	0.43683	3.3297	0.652611	97.722	995.88
1	318.64	175.16	0.92144	2.5805	0.38566	3.3297	0.652611	96.354	995.02
1	318.64	175.16	0.926575	2.58005	0.39105	3.3297	0.652611	97.583	995.19
1	318.64	175.16	0.918775	2.58264	0.39212	3.3297	0.652611	96.457	995.05
1	318.64	175.16	0.920205	2.58655	0.38786	3.3297	0.652611	96.414	995.07
1	318.64	175.16	0.918385	2.58674	0.3933	3.3297	0.652611	96.537	994.88
1	318.64	175.16	0.912145	2.49236	0.40874	3.3297	0.652611	97.794	996
1	318.64	175.16	0.91702	2.50783	0.42654	3.3297	0.652611	97.759	995.95
1	318.64	175.16	0.923195	2.57445	0.38047	3.3297	0.652611	96.44	995.16
1	318.64	175.16	0.918255	2.58225	0.37851	3.3297	0.652611	96.457	995.16
1	318.64	175.16	0.916695	2.58531	0.3888	3.3297	0.652611	96.754	994.87
1	318.64	175.16	0.91429	2.51166	0.42661	3.3297	0.652611	98.108	995.93
1	318.64	175.16	0.92482	2.57075	0.38593	3.3297	0.652611	97.115	995.16
1	318.64	175.16	0.918125	2.58895	0.39113	3.3297	0.652611	96.662	994.85
1	318.64	175.16	0.917865	2.58069	0.39036	3.3297	0.652611	96.572	994.87
1	318.64	175.16	0.919555	2.57582	0.38019	3.3297	0.652611	96.669	995.25
1	318.64	175.16	0.9191	2.57225	0.38612	3.3297	0.652611	96.712	995.2
1	318.64	175.16	0.91845	2.57614	0.38651	3.3297	0.652611	96.448	995.12
1	318.64	175.16	0.925145	2.5755	0.38184	3.3297	0.652611	96.591	995.1
1	318.64	175.16	0.92287	2.57374	0.38949	3.3297	0.652611	96.734	995.1
1	318.64	175.16	0.92118	2.57114	0.38687	3.3297	0.652611	96.458	995.05
1	318.64	175.16	0.91819	2.58525	0.38315	3.3297	0.652611	96.677	994.95
1	318.64	175.16	0.93132	2.60247	0.37725	3.3297	0.652611	97.853	995.52
1	318.64	175.16	0.938535	2.63218	0.39902	3.3297	0.652611	97.62	995.74
1	318.64	175.16	0.919295	2.58862	0.38125	3.3297	0.652611	96.5	995.31
1	318.64	175.16	0.91572	2.51349	0.43677	3.3297	0.652611	97.659	995.93
1	318.64	175.16	0.913185	2.51004	0.4416	3.3297	0.652611	97.53	995.73
1	318.64	175.16	0.92352	2.58161	0.38023	3.3297	0.652611	96.392	995.09
1	318.64	175.16	0.920335	2.58037	0.38693	3.3297	0.652611	96.605	995.09
1	318.64	175.16	0.91845	2.58063	0.38774	3.3297	0.652611	96.62	994.89
1	318.64	175.16	0.91728	2.58356	0.38525	3.3297	0.652611	96.708	995.2
1	318.64	175.16	0.921635	2.58258	0.38913	3.3297	0.652611	96.748	994.8
1	318.64	175.16	0.938275	2.63178	0.38747	3.3297	0.652611	97.297	995.89
1	318.64	175.16	0.913575	2.50477	0.42624	3.3297	0.652611	98.156	995.29
1	318.64	175.16	0.920595	2.57809	0.38214	3.3297	0.652611	96.165	995.19
1	318.64	175.16	0.921895	2.5805	0.38364	3.3297	0.652611	96.507	995.09
1	318.64	175.16	0.9204	2.57816	0.38663	3.3297	0.652611	96.627	995.03
1	318.64	175.16	0.91975	2.57751	0.39637	3.3297	0.652611	96.77	994.94
1	318.64	175.16	0.920205	2.58401	0.38285	3.3297	0.652611	96.242	995.1
1	318.64	175.16	0.92248	2.58317	0.39274	3.3297	0.652611	96.638	994.85
1	318.64	175.16	0.916825	2.58063	0.38825	3.3297	0.652611	96.42	995.19
1	318.64	175.16	0.91546	2.50874	0.42256	3.3297	0.652611	97.926	996.02
1	318.64	175.16	0.921765	2.5753	0.38084	3.3297	0.652611	96.92	995.29
1	318.64	175.16	0.91754	2.57965	0.38662	3.3297	0.652611	96.709	995.08
1	318.64	175.16	0.91858	2.58317	0.38	3.3297	0.652611	96.318	995.18
1	318.64	175.16	0.91897	2.58018	0.3843	3.3297	0.652611	96.985	994.89
1	318.64	175.16	0.919425	2.58798	0.39404	3.3297	0.652611	96.057	995.11
1	318.64	175.16	0.92612	2.57179	0.38073	3.3297	0.652611	96.82	995.19
1	318.64	175.16	0.92222	2.57491	0.38157	3.3297	0.652611	96.405	995.14
1	318.64	175.16	0.9165	2.50764	0.40859	3.3297	0.652611	97.832	995.89
1	318.64	175.16	0.92157	2.57056	0.38015	3.3297	0.652611	96.802	995.22
1	318.64	175.16	0.920985	2.57959	0.37812	3.3297	0.652611	96.338	995.24
1	318.64	175.16	0.921245	2.56731	0.38492	3.3297	0.652611	96.853	995.24
1	318.64	175.16	0.919815	2.57445	0.3788	3.3297	0.652611	96.703	995.3
1	318.64	175.16	0.92066	2.57732	0.39319	3.3297	0.652611	97.108	995.02
1	318.64	175.16	0.92131	2.55522	0.37055	3.3297	0.652611	96.823	995.25
1	318.64	175.16	0.922545	2.57647	0.38009	3.3297	0.652611	96.656	995.15
1	318.64	175.16	0.92274	2.57783	0.37833	3.3297	0.652611	96.866	995.17
1	318.64	175.16	0.936065	2.63237	0.39313	3.3297	0.652611	97.638	995.85
1	318.64	175.16	0.92495	2.57212	0.39147	3.3297	0.652611	96.896	994.98
1	318.64	175.16	0.913315	2.56516	0.40021	3.3297	0.652611	96.48	994.98
1	318.64	175.16	0.91429	2.50445	0.42894	3.3297	0.652611	97.946	996.01
1	318.64	175.16	0.92664	2.57719	0.39482	3.3297	0.652611	96.947	994.86
1	318.64	175.16	0.91351	2.54787	0.37087	3.3297	0.652611	96.594	995.04
1	318.64	175.16	0.912275	2.55846	0.39801	3.3297	0.652611	96.319	994.79
1	318.64	175.16	0.925145	2.56945	0.378	3.3297	0.652611	96.636	995.39
1	318.64	175.16	0.92729	2.57407	0.3702	3.3297	0.652611	96.043	994.72
1	318.64	175.16	0.942435	2.63094	0.39846	3.3297	0.652611	97.82	995.59
1	318.64	175.16	0.92352	2.58928	0.38185	3.3297	0.652611	96.228	995.02
1	318.64	175.16	0.91702	2.58687	0.37802	3.3297	0.652611	95.592	996.23
1	318.64	175.16	0.932425	2.60111	0.39568	3.3297	0.652611	97.274	995.71
1	318.64	175.16	0.919425	2.58375	0.38615	3.3297	0.652611	96.754	995.07
1	318.64	175.16	0.923	2.59714	0.39167	3.3297	0.652611	97.482	995.86
1	318.64	175.16	0.919165	2.58024	0.38297	3.3297	0.652611	96.58	995.12
1	318.64	175.16	0.919945	2.60078	0.39345	3.3297	0.652611	97.377	995.68
1	318.64	175.16	0.97058	2.71629	0.38796	3.3297	0.652611	97.35	995.57
1	318.64	175.16	0.913965	2.50608	0.42866	3.3297	0.652611	97.694	995.07
1	318.64	175.16	0.920595	2.58148	0.37847	3.3297	0.652611	96.026	995.19
1	318.64	175.16	0.91546	2.49899	0.4336	3.3297	0.652611	97.475	995.38
1	318.64	175.16	0.919685	2.58258	0.38074	3.3297	0.652611	96.061	995.1
1	318.64	175.16	0.91806	2.58622	0.3951	3.3297	0.652611	96.587	995.06
1	318.64	175.16	0.921375	2.57341	0.38303	3.3297	0.652611	96.617	995.1
1	318.64	175.16	0.920855	2.57823	0.39091	3.3297	0.652611	96.655	994.86
1	318.64	175.16	0.91871	2.58661	0.3906	3.3297	0.652611	96.652	995.05
1	318.64	175.16	0.91351	2.5092	0.43227	3.3297	0.652611	98.149	995.91
1	318.64	175.16	0.920335	2.58056	0.38571	3.3297	0.652611	96.678	995.05
1	318.64	175.16	0.923325	2.57225	0.37637	3.3297	0.652611	96.607	995.05
1	318.64	175.16	0.918645	2.58271	0.38707	3.3297	0.652611	96.692	995.09
1	318.64	175.16	0.923585	2.58921	0.38949	3.3297	0.652611	96.445	994.85
1	318.64	175.16	0.916045	2.58225	0.3899	3.3297	0.652611	96.649	994.93
1	318.64	175.16	0.916825	2.58258	0.39658	3.3297	0.652611	96.838	994.9
1	318.64	175.16	0.92053	2.58161	0.39157	3.3297	0.652611	96.475	994.89
1	318.64	175.16	0.92534	2.58304	0.37645	3.3297	0.652611	96.468	994.89
1	318.64	175.16	0.93756	2.62145	0.39937	3.3297	0.652611	97.458	995.61
1	318.64	175.16	0.921115	2.57816	0.3757	3.3297	0.652611	97.079	995.24
1	318.64	175.16	0.91663	2.57757	0.38574	3.3297	0.652611	96.641	995.19
1	318.64	175.16	0.92001	2.57543	0.38126	3.3297	0.652611	96.519	995.24
1	318.64	175.16	0.922155	2.57608	0.38689	3.3297	0.652611	97.206	995.09
1	318.64	175.16	0.914095	2.58148	0.37832	3.3297	0.652611	96.767	995.22
1	318.64	175.16	0.91273	2.50744	0.43479	3.3297	0.652611	97.99	996.11
1	318.64	175.16	0.92092	2.58381	0.37854	3.3297	0.652611	96.16	995.18
1	318.64	175.16	0.93873	2.62528	0.38544	3.3297	0.652611	97.427	995.87
1	318.64	175.16	0.921245	2.58264	0.3783	3.3297	0.652611	96.487	995.28
1	318.64	175.16	0.91975	2.58225	0.37819	3.3297	0.652611	96.331	995.09
1	318.64	175.16	0.91741	2.58148	0.38874	3.3297	0.652611	96.327	995.08
1	318.64	175.16	0.92443	2.58148	0.39849	3.3297	0.652611	96.031	995.23
1	318.64	175.16	0.91728	2.59005	0.38891	3.3297	0.652611	96.749	994.97
1	318.64	175.16	0.901875	2.58304	0.37807	3.3297	0.652611	96.683	994.92
1	318.64	175.16	0.92859	2.60722	0.39213	3.3297	0.652611	97.533	995.7
1	318.64	175.16	0.91988	2.58232	0.39185	3.3297	0.652611	96.623	994.78
1	318.64	175.16	0.940615	2.63334	0.39971	3.3297	0.652611	97.414	995.77
1	318.64	175.16	0.91715	2.58407	0.38057	3.3297	0.652611	96.591	994.98
1	318.64	175.16	0.92105	2.58427	0.37987	3.3297	0.652611	96.29	995.14
1	318.64	175.16	0.91468	2.58251	0.39279	3.3297	0.652611	96.264	994.97
1	318.64	175.16	0.915785	2.5818	0.38354	3.3297	0.652611	96.603	994.99
1	318.64	175.16	0.92183	2.58258	0.39418	3.3297	0.652611	96.401	994.94
1	318.64	175.16	0.91962	2.58824	0.39203	3.3297	0.652611	96.656	994.92
1	318.64	175.16	0.91871	2.57582	0.38705	3.3297	0.652611	96.564	995.05
1	318.64	175.16	0.919945	2.58596	0.39411	3.3297	0.652611	96.813	994.87
1	318.64	175.16	0.91598	2.5092	0.43069	3.3297	0.652611	97.85	995.36
1	318.64	175.16	0.92196	2.57965	0.38536	3.3297	0.652611	96.26	995.04
1	318.64	175.16	0.925665	2.58258	0.38889	3.3297	0.652611	96.589	995.15
1	318.64	175.16	0.92209	2.58154	0.37841	3.3297	0.652611	96.743	995.13
1	318.64	175.16	0.91871	2.58095	0.38241	3.3297	0.652611	96.803	994.9
1	318.64	175.16	0.922545	2.57257	0.39995	3.3297	0.652611	96.774	995.26
1	318.64	175.16	0.91585	2.58369	0.3851	3.3297	0.652611	96.612	995.02
1	318.64	175.16	0.919035	2.57212	0.37594	3.3297	0.652611	96.672	995.22
1	318.64	175.16	0.915785	2.50601	0.43197	3.3297	0.652611	97.63	995.93
1	318.64	175.16	0.92287	2.57569	0.37639	3.3297	0.652611	96.815	995.19
1	318.64	175.16	0.921115	2.57823	0.38474	3.3297	0.652611	96.699	995.27
1	318.64	175.16	0.925405	2.5688	0.37865	3.3297	0.652611	96.667	995.22
1	318.64	175.16	0.92001	2.57842	0.38701	3.3297	0.652611	96.622	995.06
1	318.64	175.16	0.92209	2.57185	0.39027	3.3297	0.652611	96.864	995.08
1	318.64	175.16	0.919815	2.582	0.38472	3.3297	0.652611	96.21	995.11
1	318.64	175.16	0.920725	2.579	0.38201	3.3297	0.652611	96.678	995.28
1	318.64	175.16	0.920075	2.57088	0.38585	3.3297	0.652611	96.769	995.1
1	318.64	175.16	0.93418	2.62652	0.38742	3.3297	0.652611	97.275	996.24
1	318.64	175.16	0.9152	2.50965	0.44183	3.3297	0.652611	98.02	996
1	318.64	175.16	0.918905	2.5829	0.37728	3.3297	0.652611	96.524	995.13
1	318.64	175.16	0.91468	2.56458	0.39087	3.3297	0.652611	96.743	995.34
1	318.64	175.16	0.912535	2.50614	0.42045	3.3297	0.652611	97.752	995.67
1	318.64	175.16	0.91962	2.57985	0.38582	3.3297	0.652611	96.142	995.08
1	318.64	175.16	0.911495	2.57244	0.38372	3.3297	0.652611	96.439	995.4
1	318.64	175.16	0.89856	2.51732	0.36702	3.3297	0.652611	95.627	994.73
1	318.64	175.16	0.930085	2.59584	0.36512	3.3297	0.652611	97.618	995.53
1	318.64	175.16	0.90103	2.54683	0.41782	3.3297	0.652611	96.474	994.48
1	318.64	175.16	0.92495	2.58414	0.38265	3.3297	0.652611	96.105	995.11
1	318.64	175.16	0.9204	2.58739	0.384	3.3297	0.652611	96.436	994.97
1	318.64	175.16	0.92898	2.60591	0.39876	3.3297	0.652611	97.649	995.69
1	318.64	175.16	0.918515	2.58433	0.38878	3.3297	0.652611	96.651	995.07
1	318.64	175.16	0.925795	2.60474	0.37803	3.3297	0.652611	97.978	995.72
1	318.64	175.16	0.91845	2.58986	0.39375	3.3297	0.652611	96.625	994.84
1	318.64	175.16	0.915265	2.50705	0.43112	3.3297	0.652611	97.569	995.51
1	318.64	175.16	0.91884	2.58206	0.39306	3.3297	0.652611	96.689	994.81
1	318.64	175.16	0.9139	2.50907	0.42139	3.3297	0.652611	97.506	995.68
1	318.64	175.16	0.921895	2.58277	0.38384	3.3297	0.652611	96.279	995.13
1	318.64	175.16	0.92014	2.58486	0.38807	3.3297	0.652611	96.782	994.96
1	318.64	175.16	0.9178	2.59038	0.39441	3.3297	0.652611	96.509	994.86
1	318.64	175.16	0.922675	2.58388	0.37994	3.3297	0.652611	96.478	995.09
1	318.64	175.16	0.923975	2.5792	0.3819	3.3297	0.652611	96.35	995.21
1	318.64	175.16	0.921505	2.5755	0.38301	3.3297	0.652611	96.391	995.22
1	318.64	175.16	0.916305	2.58018	0.38117	3.3297	0.652611	96.515	995.22
1	318.64	175.16	0.92157	2.57524	0.38509	3.3297	0.652611	96.471	995.22
1	318.64	175.16	0.922155	2.582	0.3814	3.3297	0.652611	96.268	995.2
1	318.64	175.16	0.9217	2.5755	0.37769	3.3297	0.652611	96.831	995.21
1	318.64	175.16	0.9204	2.58076	0.39953	3.3297	0.652611	96.571	994.94
1	318.64	175.16	0.92105	2.57576	0.37913	3.3297	0.652611	96.486	995.31
1	318.64	175.16	0.918775	2.57751	0.37258	3.3297	0.652611	97.073	994.93
1	318.64	175.16	0.920335	2.58394	0.39134	3.3297	0.652611	96.48	994.88
1	318.64	175.16	0.918125	2.58161	0.3871	3.3297	0.652611	96.508	995.21
1	318.64	175.16	0.91845	2.57627	0.37878	3.3297	0.652611	96.72	995.17
1	318.64	175.16	0.920335	2.57979	0.38153	3.3297	0.652611	96.506	995.23
1	318.64	175.16	0.92313	2.57355	0.37594	3.3297	0.652611	96.761	995.16
1	318.64	175.16	0.923455	2.57101	0.38978	3.3297	0.652611	96.838	995.12
1	318.64	175.16	0.91884	2.58505	0.38519	3.3297	0.652611	96.553	994.97
1	318.64	175.16	0.911755	2.49301	0.42614	3.3297	0.652611	97.77	995.99
1	318.64	175.16	0.91468	2.57361	0.39203	3.3297	0.652611	97.07	995.04
1	318.64	175.16	0.908635	2.527	0.3583	3.3297	0.652611	95.981	994.44
1	318.64	175.16	0.9152	2.50731	0.44509	3.3297	0.652611	97.535	995.8
1	318.64	175.16	0.91897	2.58238	0.39539	3.3297	0.652611	96.475	994.89
1	318.64	175.16	0.920855	2.57881	0.38509	3.3297	0.652611	96.424	995.23
1	318.64	175.16	0.932685	2.60228	0.37866	3.3297	0.652611	97.419	995.63
1	318.64	175.16	0.92066	2.57985	0.38484	3.3297	0.652611	96.561	995.09
1	318.64	175.16	0.92456	2.57257	0.37514	3.3297	0.652611	96.828	995.3
1	318.64	175.16	0.91598	2.50933	0.42688	3.3297	0.652611	97.869	995.98
1	318.64	175.16	0.918255	2.58187	0.39285	3.3297	0.652611	96.526	995.04
1	318.64	175.16	0.931775	2.60514	0.3757	3.3297	0.652611	97.317	995.51
1	318.64	175.16	0.922155	2.58206	0.3923	3.3297	0.652611	96.453	995.08
1	318.64	175.16	0.92001	2.57218	0.37922	3.3297	0.652611	96.584	995.3
1	318.64	175.16	0.923195	2.57212	0.38796	3.3297	0.652611	96.844	994.97
1	318.64	175.16	0.921245	2.57809	0.38481	3.3297	0.652611	96.506	995.14
1	318.64	175.16	0.92092	2.57302	0.38311	3.3297	0.652611	96.542	995.19
1	318.64	175.16	0.90987	2.56009	0.39829	3.3297	0.652611	95.831	994.76
1	318.64	175.16	0.92157	2.57972	0.38323	3.3297	0.652611	96.62	994.92
1	318.64	175.16	0.92287	2.57757	0.37956	3.3297	0.652611	96.641	995.28
1	318.64	175.16	0.921115	2.56678	0.3822	3.3297	0.652611	96.944	995.02
12	810.99	1150	0.939575	2.92409	0.39384	4.0649	0.672564	575.7	561.79
12	810.99	1150	0.935805	3.08197	0.35911	4.0649	0.672564	575.3	560.9
12	810.99	1150	0.936325	3.08028	0.35646	4.0649	0.672564	575.28	560.99
12	810.99	1150	0.940615	2.92578	0.3906	4.0649	0.672564	575.5	561.86
12	810.99	1150	0.938795	3.08041	0.39157	4.0649	0.672564	575.45	561.13
12	810.99	1150	0.933855	3.04798	0.36798	4.0649	0.672564	574.86	561.41
12	810.99	1150	0.935675	3.0747	0.36042	4.0649	0.672564	575.73	560.92
12	810.99	1150	0.93756	2.92988	0.41473	4.0649	0.672564	575.61	562.02
12	810.99	1150	0.938795	2.92988	0.38502	4.0649	0.672564	575.87	561.93
12	810.99	1150	0.928005	3.02608	0.36297	4.0649	0.672564	574.53	561.55
12	810.99	1150	0.938665	2.925	0.38707	4.0649	0.672564	575.95	562.12
12	810.99	1150	0.933335	3.05682	0.36913	4.0649	0.672564	574.95	561.13
12	810.99	1150	0.930865	3.05188	0.35097	4.0649	0.672564	574.84	561.27
12	810.99	1150	0.934245	3.07112	0.3565	4.0649	0.672564	575.42	560.81
12	810.99	1150	0.930735	3.05051	0.37114	4.0649	0.672564	574.86	561.43
12	810.99	1150	0.933595	3.0691	0.38398	4.0649	0.672564	575.35	561.01
12	810.99	1150	0.92807	3.02373	0.36836	4.0649	0.672564	574.84	561.47
12	810.99	1150	0.93951	2.91499	0.4008	4.0649	0.672564	575.64	562.25
12	810.99	1150	0.94328	2.9265	0.38613	4.0649	0.672564	575.86	561.94
12	810.99	1150	0.92612	2.90673	0.36788	4.0649	0.672564	574.75	563.06
12	810.99	1150	0.937885	3.08678	0.36276	4.0649	0.672564	575.71	560.91
12	810.99	1150	0.940095	2.92734	0.38267	4.0649	0.672564	575.63	561.94
12	810.99	1150	0.93678	3.07619	0.38778	4.0649	0.672564	575.15	561.03
12	810.99	1150	0.942045	3.08724	0.34652	4.0649	0.672564	575.66	560.57
12	810.99	1150	0.94302	2.92422	0.38402	4.0649	0.672564	575.46	561.94
12	810.99	1150	0.93899	2.92305	0.38971	4.0649	0.672564	575.73	561.78
12	810.99	1150	0.940485	2.92675	0.39177	4.0649	0.672564	575.98	561.98
12	810.99	1150	0.92651	3.02582	0.36716	4.0649	0.672564	574.7	561.44
12	810.99	1150	0.939055	2.92909	0.41654	4.0649	0.672564	575.55	562
12	810.99	1150	0.92677	3.02386	0.36716	4.0649	0.672564	574.58	561.42
12	810.99	1150	0.92781	3.02685	0.36396	4.0649	0.672564	574.59	561.59
12	810.99	1150	0.939705	2.91837	0.39052	4.0649	0.672564	575.08	561.85
12	810.99	1150	0.93899	2.91915	0.39295	4.0649	0.672564	575.58	561.59
12	810.99	1150	0.93002	3.05292	0.36853	4.0649	0.672564	575.23	561.37
12	810.99	1150	0.92976	3.03037	0.36477	4.0649	0.672564	574.7	561.35
12	810.99	1150	0.925275	3.01236	0.35853	4.0649	0.672564	574.15	561.61
12	810.99	1150	0.92183	3.01684	0.3707	4.0649	0.672564	574.37	561.52
12	810.99	1150	0.928005	3.03608	0.37683	4.0649	0.672564	574.61	561.18
12	810.99	1150	0.936325	3.0888	0.36433	4.0649	0.672564	575.59	560.77
12	810.99	1150	0.94133	2.9213	0.40389	4.0649	0.672564	575.78	561.91
12	810.99	1150	0.93899	2.92233	0.38682	4.0649	0.672564	575.75	561.98
12	810.99	1150	0.93015	3.03426	0.37489	4.0649	0.672564	574.89	561.49
12	810.99	1150	0.936975	3.08282	0.38513	4.0649	0.672564	575.51	561.1
12	810.99	1150	0.94016	2.91908	0.41315	4.0649	0.672564	576.06	562.09
12	810.99	1150	0.93184	3.04148	0.36818	4.0649	0.672564	574.66	561.32
12	810.99	1150	0.930215	3.04577	0.3679	4.0649	0.672564	574.81	561.32
12	810.99	1150	0.931385	3.05097	0.36523	4.0649	0.672564	574.95	561.32
12	810.99	1150	0.935155	3.08022	0.38993	4.0649	0.672564	575.6	560.98
12	810.99	1150	0.94016	3.08327	0.35575	4.0649	0.672564	575.32	560.94
12	810.99	1150	0.937365	3.08113	0.35977	4.0649	0.672564	575.21	560.92
12	810.99	1150	0.92989	3.05409	0.37223	4.0649	0.672564	575.06	561.4
12	810.99	1150	0.931255	3.06111	0.37337	4.0649	0.672564	575.14	561.21
12	810.99	1150	0.937365	3.07554	0.3531	4.0649	0.672564	575.42	560.98
12	810.99	1150	0.93184	3.055	0.36799	4.0649	0.672564	575.32	561.3
12	810.99	1150	0.932815	3.06046	0.37594	4.0649	0.672564	575.29	561.09
12	810.99	1150	0.93236	3.05312	0.36793	4.0649	0.672564	574.74	561.22
12	810.99	1150	0.936715	3.07768	0.39286	4.0649	0.672564	575.38	561.04
12	810.99	1150	0.931255	3.0485	0.3718	4.0649	0.672564	575.19	561.34
12	810.99	1150	0.933465	3.07151	0.35623	4.0649	0.672564	575.08	560.89
12	810.99	1150	0.928655	3.01789	0.36661	4.0649	0.672564	574.81	561.47
12	810.99	1150	0.941395	2.92513	0.41077	4.0649	0.672564	575.85	562.13
12	810.99	1150	0.941005	2.9209	0.41368	4.0649	0.672564	575.52	562.08
12	810.99	1150	0.9399	2.92786	0.38252	4.0649	0.672564	575.77	561.91
12	810.99	1150	0.939315	3.09016	0.36795	4.0649	0.672564	575.27	560.66
12	810.99	1150	0.93613	3.08406	0.3957	4.0649	0.672564	575.47	560.86
12	810.99	1150	0.940095	2.92669	0.38154	4.0649	0.672564	575.68	561.76
12	810.99	1150	0.92443	3.00983	0.36529	4.0649	0.672564	574.19	561.66
12	810.99	1150	0.934635	3.08419	0.36008	4.0649	0.672564	575.52	560.94
12	810.99	1150	0.92703	3.03186	0.36491	4.0649	0.672564	574.96	561.35
12	810.99	1150	0.926835	3.05324	0.36792	4.0649	0.672564	575.06	561.33
12	810.99	1150	0.94146	3.09627	0.36332	4.0649	0.672564	576.06	560.72
12	810.99	1150	0.927485	3.05604	0.39954	4.0649	0.672564	573.51	561.93
12	810.99	1150	0.931385	3.04681	0.36878	4.0649	0.672564	574.73	561.39
12	810.99	1150	0.93886	2.925	0.37634	4.0649	0.672564	575.62	561.78
12	810.99	1150	0.939575	2.92136	0.38467	4.0649	0.672564	575.6	561.76
12	810.99	1150	0.92742	3.03355	0.3667	4.0649	0.672564	574.54	561.38
12	810.99	1150	0.9373	2.92389	0.38278	4.0649	0.672564	575.19	561.6
12	810.99	1150	0.931385	3.05636	0.35317	4.0649	0.672564	575.1	561.22
12	810.99	1150	0.928525	3.03732	0.37046	4.0649	0.672564	574.87	561.37
12	810.99	1150	0.933465	3.06585	0.38269	4.0649	0.672564	575.17	561.12
12	810.99	1150	0.93405	3.06163	0.37313	4.0649	0.672564	575.08	561.26
12	810.99	1150	0.932165	3.05526	0.37005	4.0649	0.672564	574.91	561.29
12	810.99	1150	0.92963	3.04122	0.37808	4.0649	0.672564	574.84	561.25
12	810.99	1150	0.93054	3.05617	0.37163	4.0649	0.672564	575.08	561.43
12	810.99	1150	0.93509	3.06716	0.37958	4.0649	0.672564	575.57	561.07
12	810.99	1150	0.92794	3.02114	0.37233	4.0649	0.672564	574.52	561.36
12	810.99	1150	0.932165	3.06215	0.38151	4.0649	0.672564	575.05	561.12
12	810.99	1150	0.92963	3.02296	0.37004	4.0649	0.672564	574.76	561.29
12	810.99	1150	0.9399	2.92786	0.39448	4.0649	0.672564	575.98	561.28
12	810.99	1150	0.93795	3.0875	0.36592	4.0649	0.672564	575.57	560.84
12	810.99	1150	0.9386	3.08945	0.35547	4.0649	0.672564	575.52	560.77
12	810.99	1150	0.938665	3.0862	0.37913	4.0649	0.672564	575.24	560.8
12	810.99	1150	0.93873	3.08685	0.36108	4.0649	0.672564	575.48	560.83
12	810.99	1150	0.94003	3.08159	0.3583	4.0649	0.672564	575.33	560.91
12	810.99	1150	0.9347	3.05793	0.35322	4.0649	0.672564	575.13	561.04
12	810.99	1150	0.939965	2.92162	0.38092	4.0649	0.672564	575.91	561.95
12	810.99	1150	0.94172	3.09601	0.3727	4.0649	0.672564	575.57	561.13
12	810.99	1150	0.951665	3.13254	0.35755	4.0649	0.672564	576.01	561.17
12	810.99	1150	0.94146	3.0992	0.36339	4.0649	0.672564	575.71	560.73
12	810.99	1150	0.95121	3.13105	0.34988	4.0649	0.672564	576.23	561.34
12	810.99	1150	0.928395	3.02465	0.36162	4.0649	0.672564	574.37	561.33
12	810.99	1150	0.934765	2.89724	0.378	4.0649	0.672564	573.59	562.53
12	810.99	1150	0.938665	2.91993	0.39166	4.0649	0.672564	575.67	561.64
12	810.99	1150	0.92352	3.01567	0.36725	4.0649	0.672564	574.49	561.51
12	810.99	1150	0.93951	2.92708	0.38447	4.0649	0.672564	574.2	562.57
12	810.99	1150	0.942305	2.92188	0.38894	4.0649	0.672564	575.59	561.82
12	810.99	1150	0.933465	3.05149	0.36582	4.0649	0.672564	575.02	561.3
12	810.99	1150	0.942955	3.0977	0.35761	4.0649	0.672564	575.54	560.92
12	810.99	1150	0.920725	3.01106	0.36228	4.0649	0.672564	574.34	561.53
12	810.99	1150	0.925275	3.01984	0.36495	4.0649	0.672564	574.57	561.42
12	810.99	1150	0.933855	3.0784	0.36129	4.0649	0.672564	575.24	560.91
12	810.99	1150	0.92755	3.03108	0.36067	4.0649	0.672564	574.58	561.53
12	810.99	1150	0.93665	3.07457	0.35908	4.0649	0.672564	575.2	560.89
12	810.99	1150	0.939705	2.92481	0.40133	4.0649	0.672564	576.15	562.16
12	810.99	1150	0.9308	3.05949	0.37362	4.0649	0.672564	574.96	561.22
12	810.99	1150	0.93145	3.0513	0.37054	4.0649	0.672564	574.84	561.3
12	810.99	1150	0.927485	3.04142	0.37759	4.0649	0.672564	574.73	561.26
12	810.99	1150	0.93457	3.06637	0.35913	4.0649	0.672564	575.2	560.95
12	810.99	1150	0.933335	3.05247	0.3644	4.0649	0.672564	574.94	561.17
12	810.99	1150	0.9399	3.07847	0.35727	4.0649	0.672564	575.47	560.96
12	810.99	1150	0.93587	3.06176	0.38194	4.0649	0.672564	575.3	560.97
12	810.99	1150	0.936	3.07372	0.35424	4.0649	0.672564	575.26	561.02
12	810.99	1150	0.928785	3.04824	0.36742	4.0649	0.672564	574.71	561.33
12	810.99	1150	0.93353	3.04954	0.36386	4.0649	0.672564	574.77	561.32
12	810.99	1150	0.92807	3.04265	0.37934	4.0649	0.672564	574.51	561.22
12	810.99	1150	0.932555	3.05201	0.35104	4.0649	0.672564	574.92	561.3
12	810.99	1150	0.94003	3.08639	0.36232	4.0649	0.672564	575.54	560.66
12	810.99	1150	0.93158	3.05786	0.36688	4.0649	0.672564	574.92	561.3
12	810.99	1150	0.930215	3.05734	0.37284	4.0649	0.672564	575.22	561.2
12	810.99	1150	0.934895	3.06391	0.35517	4.0649	0.672564	574.89	561
12	810.99	1150	0.936455	3.07255	0.38908	4.0649	0.672564	575.07	561.03
12	810.99	1150	0.940875	3.09849	0.3842	4.0649	0.672564	575.58	561
12	810.99	1150	0.93197	3.05487	0.36786	4.0649	0.672564	574.93	561.27
12	810.99	1150	0.942565	3.09901	0.36274	4.0649	0.672564	575.53	560.82
12	810.99	1150	0.942825	3.09621	0.36362	4.0649	0.672564	575.45	560.89
12	810.99	1150	0.935675	3.07294	0.35206	4.0649	0.672564	575.41	560.99
12	810.99	1150	0.929305	3.02257	0.3649	4.0649	0.672564	574.56	561.51
12	810.99	1150	0.93652	3.06436	0.35735	4.0649	0.672564	575.44	560.93
12	810.99	1150	0.937885	3.08568	0.36694	4.0649	0.672564	575.53	560.62
12	810.99	1150	0.9386	2.88379	0.38182	4.0649	0.672564	573.77	562.07
12	810.99	1150	0.939835	3.08815	0.36957	4.0649	0.672564	575.82	560.58
12	810.99	1150	0.937495	3.08627	0.35803	4.0649	0.672564	575.3	561.02
12	810.99	1150	0.94588	3.09699	0.39674	4.0649	0.672564	575.76	560.9
12	810.99	1150	0.94042	3.08731	0.35168	4.0649	0.672564	575.05	561.03
12	810.99	1150	0.92573	3.01379	0.36296	4.0649	0.672564	574.16	561.45
12	810.99	1150	0.92573	3.03114	0.36483	4.0649	0.672564	574.49	561.58
12	810.99	1150	0.92963	3.03407	0.36342	4.0649	0.672564	574.79	561.43
12	810.99	1150	0.926185	3.01541	0.35924	4.0649	0.672564	574.31	561.44
12	810.99	1150	0.93522	3.06241	0.36659	4.0649	0.672564	573.66	562.12
12	810.99	1150	0.932425	3.04856	0.3615	4.0649	0.672564	574.96	561.27
12	810.99	1150	0.93275	3.05214	0.36916	4.0649	0.672564	575.09	561.25
12	810.99	1150	0.93782	2.92461	0.38757	4.0649	0.672564	575.6	562.12
12	810.99	1150	0.928525	3.03524	0.36435	4.0649	0.672564	574.63	561.45
12	810.99	1150	0.939445	2.92591	0.38259	4.0649	0.672564	575.05	561.87
12	810.99	1150	0.925275	3.03316	0.36162	4.0649	0.672564	574.37	561.46
12	810.99	1150	0.938015	3.06501	0.38064	4.0649	0.672564	575.43	561.07
12	810.99	1150	0.936585	3.06352	0.35244	4.0649	0.672564	575.47	560.95
12	810.99	1150	0.92807	3.04434	0.36696	4.0649	0.672564	574.68	561.34
12	810.99	1150	0.926185	3.02881	0.36516	4.0649	0.672564	574.67	561.4
12	810.99	1150	0.93184	3.04388	0.3746	4.0649	0.672564	574.57	561.32
12	810.99	1150	0.93028	3.04291	0.37321	4.0649	0.672564	574.93	561.31
12	810.99	1150	0.92963	3.05006	0.35912	4.0649	0.672564	574.94	561.37
12	810.99	1150	0.922155	3.02165	0.3689	4.0649	0.672564	574.66	561.41
12	810.99	1150	0.935025	3.06488	0.38157	4.0649	0.672564	575.15	561.07
12	810.99	1150	0.938665	3.08269	0.36592	4.0649	0.672564	575.82	560.77
12	810.99	1150	0.94211	3.08828	0.34673	4.0649	0.672564	575.29	560.65
12	810.99	1150	0.93119	3.0563	0.37129	4.0649	0.672564	574.84	561.17
12	810.99	1150	0.939575	3.08821	0.35866	4.0649	0.672564	575.61	560.87
12	810.99	1150	0.950495	3.08458	0.34314	4.0649	0.672564	574.89	561.25
12	810.99	1150	0.940355	3.10148	0.35393	4.0649	0.672564	575.69	560.89
12	810.99	1150	0.933465	3.04551	0.36429	4.0649	0.672564	575.07	561.34
12	810.99	1150	0.939315	3.08321	0.36038	4.0649	0.672564	575.41	561
12	810.99	1150	0.933465	3.06598	0.38106	4.0649	0.672564	575.1	561.12
12	810.99	1150	0.93431	3.07222	0.38652	4.0649	0.672564	575.48	560.98
12	810.99	1150	0.922675	3.02465	0.36685	4.0649	0.672564	574.55	561.36
12	810.99	1150	0.949715	3.13586	0.36087	4.0649	0.672564	575.97	561.25
12	810.99	1150	0.94263	3.09875	0.35556	4.0649	0.672564	575.69	560.82
12	810.99	1150	0.96603	3.03433	0.40351	4.0649	0.672564	574.92	561.44
12	810.99	1150	0.94055	2.92149	0.40134	4.0649	0.672564	575.66	561.74
12	810.99	1150	0.938795	3.0888	0.36323	4.0649	0.672564	575.57	560.89
12	810.99	1150	0.939055	2.92584	0.38374	4.0649	0.672564	575.69	561.64
12	810.99	1150	0.926055	3.00697	0.39204	4.0649	0.672564	574.28	561.81
12	810.99	1150	0.92599	3.01522	0.36131	4.0649	0.672564	574.73	561.48
12	810.99	1150	0.927225	3.02224	0.36263	4.0649	0.672564	574.44	561.4
12	810.99	1150	0.93041	3.05149	0.37243	4.0649	0.672564	575.38	561.42
12	810.99	1150	0.940745	3.09803	0.35489	4.0649	0.672564	575.31	560.68
12	810.99	1150	0.93808	3.0721	0.35633	4.0649	0.672564	574.89	561.19
12	810.99	1150	0.93028	3.05175	0.36585	4.0649	0.672564	574.96	561.46
12	810.99	1150	0.93405	3.06956	0.34926	4.0649	0.672564	575.29	560.86
12	810.99	1150	0.92755	3.03634	0.36088	4.0649	0.672564	574.6	561.47
12	810.99	1150	0.92703	3.03557	0.37137	4.0649	0.672564	574.59	561.36
12	810.99	1150	0.93899	2.92201	0.39215	4.0649	0.672564	575.91	561.43
12	810.99	1150	0.931905	3.05617	0.37812	4.0649	0.672564	575.15	561.24
12	810.99	1150	0.93171	3.0535	0.37738	4.0649	0.672564	574.76	561.29
12	810.99	1150	0.9308	3.04454	0.37603	4.0649	0.672564	574.52	561.15
12	810.99	1150	0.92859	3.03992	0.37953	4.0649	0.672564	574.57	561.29
12	810.99	1150	0.926705	3.04876	0.36222	4.0649	0.672564	574.68	561.45
12	810.99	1150	0.936975	3.07931	0.35808	4.0649	0.672564	575.35	561.08
12	810.99	1150	0.93938	2.92637	0.41668	4.0649	0.672564	575.78	562.11
12	810.99	1150	0.93886	3.08633	0.36788	4.0649	0.672564	575.3	560.8
12	810.99	1150	0.92456	3.01971	0.37157	4.0649	0.672564	574.43	561.37
12	810.99	1150	0.92612	3.02452	0.36987	4.0649	0.672564	574.79	561.5
12	810.99	1150	0.95277	3.13391	0.35855	4.0649	0.672564	575.89	561.15
12	810.99	1150	0.96083	3.15484	0.35359	4.0649	0.672564	575.76	561.23
12	810.99	1150	0.94029	2.91798	0.38254	4.0649	0.672564	575.72	561.52
12	810.99	1150	0.93509	3.06059	0.38066	4.0649	0.672564	575.01	561.15
12	810.99	1150	0.93977	2.92663	0.41592	4.0649	0.672564	575.77	562
12	810.99	1150	0.923325	3.01132	0.37344	4.0649	0.672564	574.84	561.66
12	810.99	1150	0.924755	3.01347	0.36162	4.0649	0.672564	574.35	561.69
12	810.99	1150	0.928525	3.02997	0.36572	4.0649	0.672564	574.38	561.33
12	810.99	1150	0.932165	3.05474	0.37457	4.0649	0.672564	574.94	561.24
12	810.99	1150	0.94718	3.12461	0.35472	4.0649	0.672564	575.63	561.3
12	810.99	1150	0.96447	3.17044	0.35018	4.0649	0.672564	575.97	561.58
12	810.99	1150	0.95238	3.13053	0.34003	4.0649	0.672564	575.92	561.08
12	810.99	1150	0.938405	3.08204	0.38847	4.0649	0.672564	575.61	561.02
12	810.99	1150	0.92885	3.02946	0.36659	4.0649	0.672564	574.71	561.57
12	810.99	1150	0.92794	3.03186	0.35977	4.0649	0.672564	574.86	561.46
12	810.99	1150	0.938405	2.92376	0.39211	4.0649	0.672564	575.45	561.77
12	810.99	1150	0.926835	3.024	0.37257	4.0649	0.672564	574.58	561.22
12	810.99	1150	0.951665	3.13521	0.35585	4.0649	0.672564	576.17	561.26
12	810.99	1150	0.930215	3.0433	0.35364	4.0649	0.672564	574.58	561.26
12	810.99	1150	0.929695	3.03953	0.37691	4.0649	0.672564	574.59	561.27
12	810.99	1150	0.93093	3.0522	0.36702	4.0649	0.672564	575.16	561.51
12	810.99	1150	0.936	3.07859	0.35719	4.0649	0.672564	575.23	560.87
12	810.99	1150	0.92898	3.03634	0.36805	4.0649	0.672564	574.6	561.62
12	810.99	1150	0.93145	3.03518	0.36572	4.0649	0.672564	574.64	561.35
12	810.99	1150	0.93392	3.07353	0.35343	4.0649	0.672564	575.44	560.99
12	810.99	1150	0.93652	3.07483	0.36027	4.0649	0.672564	575.48	560.87
12	810.99	1150	0.93158	3.05038	0.37582	4.0649	0.672564	575.03	561.34
12	810.99	1150	0.939445	2.92344	0.38606	4.0649	0.672564	575.83	562.02
12	810.99	1150	0.932425	3.05429	0.34696	4.0649	0.672564	575.13	561.24
12	810.99	1150	0.9386	2.92169	0.41093	4.0649	0.672564	575.71	561.92
12	810.99	1150	0.93431	3.06358	0.37922	4.0649	0.672564	574.89	561.07
12	810.99	1150	0.934895	3.06371	0.37721	4.0649	0.672564	575.3	561.21
12	810.99	1150	0.93431	3.06722	0.38285	4.0649	0.672564	575.06	561.12
12	810.99	1150	0.93704	3.07242	0.36076	4.0649	0.672564	575.2	560.91
12	810.99	1150	0.93158	3.04109	0.3776	4.0649	0.672564	574.64	561.28
12	810.99	1150	0.93366	3.08087	0.34915	4.0649	0.672564	575.39	561.02
12	810.99	1150	0.9568	3.1497	0.34943	4.0649	0.672564	576.38	561.49
12	810.99	1150	0.931775	3.04798	0.36096	4.0649	0.672564	574.93	561.48
12	810.99	1150	0.92586	3.03433	0.36005	4.0649	0.672564	574.58	561.48
12	810.99	1150	0.94146	2.92701	0.38902	4.0649	0.672564	575.85	561.9
12	810.99	1150	0.93522	3.08926	0.36454	4.0649	0.672564	575.7	560.74
12	810.99	1150	0.94289	3.08854	0.36302	4.0649	0.672564	575.94	560.59
12	810.99	1150	0.927355	3.02458	0.36308	4.0649	0.672564	574.57	561.5
12	810.99	1150	0.931125	3.05767	0.37188	4.0649	0.672564	574.82	561.29
12	810.99	1150	0.94432	3.09693	0.35534	4.0649	0.672564	574.58	560.43
12	810.99	1150	0.942825	3.09855	0.34532	4.0649	0.672564	575.41	560.69
12	810.99	1150	0.94978	3.12474	0.35544	4.0649	0.672564	575.61	561.39
12	810.99	1150	0.94224	2.92279	0.40779	4.0649	0.672564	575.89	562.05
12	810.99	1150	0.92703	3.02575	0.36733	4.0649	0.672564	574.79	561.5
12	810.99	1150	0.928915	3.03147	0.36454	4.0649	0.672564	574.81	561.49
12	810.99	1150	0.92599	3.02146	0.36774	4.0649	0.672564	574.63	561.46
12	810.99	1150	0.929695	3.02309	0.37293	4.0649	0.672564	574.59	561.32
12	810.99	1150	0.94562	3.12111	0.35765	4.0649	0.672564	575.85	561.23
12	810.99	1150	0.9854	3.24805	0.35846	4.0649	0.672564	575.98	561.3
12	810.99	1150	0.938145	2.92272	0.37426	4.0649	0.672564	575.42	561.62
12	810.99	1150	0.933855	3.06026	0.38545	4.0649	0.672564	575.38	560.96
12	810.99	1150	0.938535	3.0836	0.3915	4.0649	0.672564	575.36	560.88
12	810.99	1150	0.923195	3.0093	0.36416	4.0649	0.672564	574.53	561.8
12	810.99	1150	0.92794	3.01372	0.36676	4.0649	0.672564	574.31	561.49
12	810.99	1150	0.925275	3.02413	0.36996	4.0649	0.672564	574.46	561.31
12	810.99	1150	0.95355	3.146	0.35135	4.0649	0.672564	575.58	561.54
12	810.99	1150	0.932295	3.04961	0.37168	4.0649	0.672564	574.81	561.29
12	810.99	1150	0.93938	2.92552	0.41372	4.0649	0.672564	576.15	562.02
12	810.99	1150	0.929435	3.04649	0.36521	4.0649	0.672564	574.66	561.56
12	810.99	1150	0.938015	3.08691	0.36511	4.0649	0.672564	575.31	560.9
12	810.99	1150	0.93249	3.05987	0.37322	4.0649	0.672564	575.33	561.2
12	810.99	1150	0.93236	3.03544	0.3709	4.0649	0.672564	574.71	561.3
12	810.99	1150	0.941135	2.92253	0.39052	4.0649	0.672564	575.46	561.82
12	810.99	1150	0.93483	3.07716	0.35358	4.0649	0.672564	575.44	560.96
12	810.99	1150	0.926445	3.03843	0.37121	4.0649	0.672564	574.79	561.36
12	810.99	1150	0.92976	3.03914	0.37277	4.0649	0.672564	574.62	561.11
12	810.99	1150	0.92963	3.04102	0.3739	4.0649	0.672564	574.58	561.11
12	810.99	1150	0.94666	3.12149	0.35105	4.0649	0.672564	575.47	561.44
12	810.99	1150	0.93535	3.06196	0.36677	4.0649	0.672564	575.19	561
12	810.99	1150	0.93925	2.92195	0.37941	4.0649	0.672564	575.67	561.78
12	810.99	1150	0.93691	3.08776	0.35811	4.0649	0.672564	575.46	560.76
12	810.99	1150	0.927095	3.01723	0.36212	4.0649	0.672564	574.29	561.3
12	810.99	1150	0.934375	3.05513	0.37574	4.0649	0.672564	575.01	561.29
12	810.99	1150	0.936	3.0808	0.35516	4.0649	0.672564	574.69	560.66
12	810.99	1150	0.96096	3.15237	0.34298	4.0649	0.672564	575.97	561.5
12	810.99	1150	0.9399	2.92474	0.39222	4.0649	0.672564	575.78	561.71
12	810.99	1150	0.93626	3.06189	0.3531	4.0649	0.672564	575.19	561.12
12	810.99	1150	0.937885	2.92844	0.3882	4.0649	0.672564	575.42	561.98
12	810.99	1150	0.923	3.01086	0.35772	4.0649	0.672564	574.06	561.77
12	810.99	1150	0.92209	3.01041	0.36308	4.0649	0.672564	574.16	561.56
12	810.99	1150	0.928915	3.02569	0.36398	4.0649	0.672564	574.66	561.53
12	810.99	1150	0.933335	3.05279	0.37435	4.0649	0.672564	574.89	561.32
12	810.99	1150	0.949195	3.13131	0.35276	4.0649	0.672564	575.67	561.3
12	810.99	1150	0.962325	3.15848	0.34855	4.0649	0.672564	575.69	561.39
12	810.99	1150	0.939445	3.0862	0.36365	4.0649	0.672564	575.52	561.05
12	810.99	1150	0.927875	3.02595	0.36455	4.0649	0.672564	574.88	561.46
12	810.99	1150	0.925535	3.03212	0.36976	4.0649	0.672564	574.76	561.31
12	810.99	1150	0.928785	3.02633	0.37016	4.0649	0.672564	574.57	561.35
12	810.99	1150	0.94692	3.12182	0.34435	4.0649	0.672564	575.85	561.27
12	810.99	1150	0.93028	3.03849	0.37716	4.0649	0.672564	574.43	561.19
12	810.99	1150	0.929435	3.04245	0.37189	4.0649	0.672564	574.78	561.21
12	810.99	1150	0.92963	3.04388	0.36794	4.0649	0.672564	574.6	561.47
12	810.99	1150	0.93327	3.07944	0.3851	4.0649	0.672564	575.65	561
12	810.99	1150	0.92846	3.0277	0.36163	4.0649	0.672564	574.6	561.57
12	810.99	1150	0.92573	3.02946	0.37201	4.0649	0.672564	574.53	561.41
12	810.99	1150	0.934635	3.07164	0.38931	4.0649	0.672564	575.46	560.97
12	810.99	1150	0.9347	3.0823	0.38439	4.0649	0.672564	575.19	560.93
12	810.99	1150	0.92963	3.05077	0.37096	4.0649	0.672564	574.98	561.27
12	810.99	1150	0.938665	2.92246	0.39135	4.0649	0.672564	575.93	561.91
12	810.99	1150	0.93197	3.04961	0.36406	4.0649	0.672564	575.28	561.34
12	810.99	1150	0.941005	2.92357	0.38454	4.0649	0.672564	575.83	561.96
12	810.99	1150	0.933595	3.0613	0.38581	4.0649	0.672564	575.15	561.2
12	810.99	1150	0.93392	3.06228	0.37364	4.0649	0.672564	575.24	561.2
12	810.99	1150	0.93236	3.07294	0.3916	4.0649	0.672564	575.11	561.15
12	810.99	1150	0.937885	3.08113	0.35348	4.0649	0.672564	575.23	560.95
12	810.99	1150	0.928135	3.03615	0.37654	4.0649	0.672564	574.72	561.28
12	810.99	1150	0.933985	3.07996	0.39857	4.0649	0.672564	575.6	561.01
12	810.99	1150	0.95381	3.14489	0.34547	4.0649	0.672564	575.48	561.72
12	810.99	1150	0.94055	2.92266	0.37676	4.0649	0.672564	575.55	561.68
12	810.99	1150	0.92586	3.03193	0.36865	4.0649	0.672564	574.78	561.47
12	810.99	1150	0.93873	2.92246	0.38713	4.0649	0.672564	575.54	562
12	810.99	1150	0.922935	3.01288	0.36364	4.0649	0.672564	574.16	561.67
12	810.99	1150	0.941395	3.08945	0.35501	4.0649	0.672564	575.45	560.59
12	810.99	1150	0.930605	3.05416	0.37181	4.0649	0.672564	575.11	561.24
12	810.99	1150	0.933725	3.07918	0.36097	4.0649	0.672564	574.41	560.74
12	810.99	1150	0.932555	3.08159	0.35551	4.0649	0.672564	574.75	560.55
12	810.99	1150	0.94471	3.09348	0.36109	4.0649	0.672564	575.61	560.85
12	810.99	1150	0.949845	3.12786	0.35284	4.0649	0.672564	575.75	561.55
12	810.99	1150	0.939835	2.92656	0.39115	4.0649	0.672564	575.77	561.71
12	810.99	1150	0.92768	3.02705	0.36202	4.0649	0.672564	574.53	561.55
12	810.99	1150	0.927745	3.03277	0.36273	4.0649	0.672564	574.47	561.53
12	810.99	1150	0.93002	3.07391	0.35541	4.0649	0.672564	575.33	560.96
12	810.99	1150	0.94887	3.09875	0.37028	4.0649	0.672564	574.77	560.18
12	810.99	1150	0.93132	3.03706	0.37139	4.0649	0.672564	574.73	561.26
12	810.99	1150	0.926705	3.03478	0.3721	4.0649	0.672564	574.71	561.22
12	810.99	1150	0.938145	2.92474	0.37874	4.0649	0.672564	575.58	561.58
12	810.99	1150	0.93223	3.06358	0.38601	4.0649	0.672564	575.1	561.08
12	810.99	1150	0.94094	2.91902	0.37437	4.0649	0.672564	575.6	561.16
12	810.99	1150	0.9243	3.00943	0.37591	4.0649	0.672564	574.66	561.71
12	810.99	1150	0.925145	3.01756	0.36657	4.0649	0.672564	574.11	561.53
12	810.99	1150	0.94692	3.107	0.3541	4.0649	0.672564	574.66	560.71
12	810.99	1150	0.92885	3.03206	0.37144	4.0649	0.672564	574.62	561.24
12	810.99	1150	0.93197	3.05266	0.36804	4.0649	0.672564	575.17	561.27
12	810.99	1150	0.93938	2.92838	0.39002	4.0649	0.672564	575.73	562.08
12	810.99	1150	0.93626	3.05923	0.36733	4.0649	0.672564	575.28	561.16
12	810.99	1150	0.937235	2.92701	0.39934	4.0649	0.672564	575.56	561.74
12	810.99	1150	0.933595	3.05519	0.38278	4.0649	0.672564	575.25	561.21
12	810.99	1150	0.935675	3.06007	0.3886	4.0649	0.672564	575.14	561.08
12	810.99	1150	0.938405	2.92532	0.38588	4.0649	0.672564	575.21	561.81
12	810.99	1150	0.953615	3.13865	0.35533	4.0649	0.672564	576.12	561.39
12	810.99	1150	0.932295	3.03888	0.36828	4.0649	0.672564	574.67	561.12
12	810.99	1150	0.928655	3.04038	0.37373	4.0649	0.672564	574.78	561.18
12	810.99	1150	0.929695	3.04603	0.3697	4.0649	0.672564	574.72	561.32
12	810.99	1150	0.94848	3.12312	0.39207	4.0649	0.672564	575.19	561.92
12	810.99	1150	0.93301	3.04668	0.36398	4.0649	0.672564	574.86	561.48
12	810.99	1150	0.939965	2.92481	0.39198	4.0649	0.672564	575.74	562
12	810.99	1150	0.93665	3.08315	0.36006	4.0649	0.672564	575.42	560.87
12	810.99	1150	0.924235	3.02328	0.36923	4.0649	0.672564	574.45	561.37
12	810.99	1150	0.936455	3.06722	0.37897	4.0649	0.672564	575.31	561.11
12	810.99	1150	0.925275	3.0093	0.36275	4.0649	0.672564	574.23	561.7
12	810.99	1150	0.929825	3.07151	0.38602	4.0649	0.672564	575.31	561.11
12	810.99	1150	0.936065	2.92747	0.39547	4.0649	0.672564	575.34	561.76
12	810.99	1150	0.932555	3.06312	0.38344	4.0649	0.672564	574.9	561.13
12	810.99	1150	0.92235	3.00879	0.40423	4.0649	0.672564	574.28	561.76
12	810.99	1150	0.92209	3.00502	0.36057	4.0649	0.672564	574.42	561.62
12	810.99	1150	0.92703	3.01607	0.36096	4.0649	0.672564	574.11	561.59
12	810.99	1150	0.929695	3.03751	0.37636	4.0649	0.672564	574.71	561.32
12	810.99	1150	0.940615	3.09524	0.34855	4.0649	0.672564	575.1	561.09
12	810.99	1150	0.948935	3.1328	0.35517	4.0649	0.672564	575.79	561.3
12	810.99	1150	0.95862	3.16088	0.37064	4.0649	0.672564	576.18	561.49
12	810.99	1150	0.93951	2.92266	0.38356	4.0649	0.672564	575.44	561.49
12	810.99	1150	0.93457	3.05831	0.35396	4.0649	0.672564	575.24	561.01
12	810.99	1150	0.941265	2.92461	0.38327	4.0649	0.672564	575.92	561.61
12	810.99	1150	0.923585	3.01132	0.36203	4.0649	0.672564	574.6	561.73
12	810.99	1150	0.93899	2.92077	0.39068	4.0649	0.672564	575.71	561.85
12	810.99	1150	0.930605	3.05227	0.37102	4.0649	0.672564	574.81	561.32
12	810.99	1150	0.92924	3.03478	0.37509	4.0649	0.672564	574.63	561.3
12	810.99	1150	0.932685	3.03687	0.37398	4.0649	0.672564	574.65	561.17
12	810.99	1150	0.929825	3.03972	0.37934	4.0649	0.672564	574.62	561.25
12	810.99	1150	0.9295	3.04512	0.35901	4.0649	0.672564	575	561.56
12	810.99	1150	0.939705	2.9213	0.38579	4.0649	0.672564	575.46	561.51
12	810.99	1150	0.92885	3.02601	0.35726	4.0649	0.672564	574.8	561.59
12	810.99	1150	0.930865	3.03654	0.36277	4.0649	0.672564	574.6	561.6
12	810.99	1150	0.934505	3.07099	0.35717	4.0649	0.672564	575.2	560.88
12	810.99	1150	0.94835	3.0992	0.34858	4.0649	0.672564	574.7	560.99
12	810.99	1150	0.93041	3.03895	0.37448	4.0649	0.672564	574.62	561.11
12	810.99	1150	0.92755	3.04025	0.37044	4.0649	0.672564	574.79	561.18
12	810.99	1150	0.932035	3.05474	0.37861	4.0649	0.672564	575.01	561.36
12	810.99	1150	0.940225	2.92136	0.39542	4.0649	0.672564	575.46	561.9
12	810.99	1150	0.9321	3.0407	0.38767	4.0649	0.672564	574.67	561.54
12	810.99	1150	0.93444	3.06475	0.37818	4.0649	0.672564	575.36	561.17
12	810.99	1150	0.93509	3.0656	0.377	4.0649	0.672564	575.23	561.14
12	810.99	1150	0.939575	3.09062	0.36251	4.0649	0.672564	574.84	561.2
12	810.99	1150	0.934245	3.06793	0.35725	4.0649	0.672564	575.35	560.96
12	810.99	1150	0.938015	3.08471	0.35688	4.0649	0.672564	575.39	560.87
12	810.99	1150	0.954785	3.14457	0.34957	4.0649	0.672564	576.07	561.33
12	810.99	1150	0.938405	2.9187	0.38813	4.0649	0.672564	575.39	561.74
12	810.99	1150	0.932425	3.04623	0.36509	4.0649	0.672564	574.95	561.48
12	810.99	1150	0.937105	2.92669	0.39526	4.0649	0.672564	575.54	561.73
12	810.99	1150	0.942825	3.09939	0.3636	4.0649	0.672564	575.61	560.69
12	810.99	1150	0.93808	3.09153	0.3465	4.0649	0.672564	575.39	560.66
12	810.99	1150	0.92898	3.03518	0.37751	4.0649	0.672564	574.85	561.26
12	810.99	1150	0.92339	3.01411	0.36338	4.0649	0.672564	574.45	561.57
12	810.99	1150	0.92872	3.06677	0.37331	4.0649	0.672564	574.77	561.15
12	810.99	1150	0.95043	3.12656	0.35745	4.0649	0.672564	575.44	561.3
12	810.99	1150	0.925665	3.01035	0.36319	4.0649	0.672564	574.5	561.71
12	810.99	1150	0.928525	3.03076	0.36766	4.0649	0.672564	574.35	561.48
12	810.99	1150	0.926705	3.03017	0.36552	4.0649	0.672564	574.44	561.53
12	810.99	1150	0.934765	3.0745	0.37864	4.0649	0.672564	575.16	561.14
12	810.99	1150	0.946335	3.1044	0.3555	4.0649	0.672564	575	560.86
12	810.99	1150	0.9282	3.04284	0.37022	4.0649	0.672564	575.09	561.45
12	810.99	1150	0.93145	3.04012	0.37244	4.0649	0.672564	574.46	561.15
12	810.99	1150	0.9399	2.92084	0.38836	4.0649	0.672564	575.38	561.55
12	810.99	1150	0.932685	3.05974	0.36049	4.0649	0.672564	574.91	561.08
12	810.99	1150	0.93951	2.92084	0.42548	4.0649	0.672564	575.68	561.88
12	810.99	1150	0.923195	3.0121	0.37508	4.0649	0.672564	574.28	561.65
12	810.99	1150	0.92469	3.01216	0.35609	4.0649	0.672564	574.27	561.6
12	810.99	1150	0.94731	3.10108	0.34742	4.0649	0.672564	574.36	560.28
12	810.99	1150	0.9282	3.03258	0.37094	4.0649	0.672564	574.49	561.21
12	810.99	1150	0.930215	3.05156	0.36332	4.0649	0.672564	574.79	561.39
12	810.99	1150	0.942175	2.92812	0.3796	4.0649	0.672564	575.75	561.39
12	810.99	1150	0.931905	3.05916	0.37598	4.0649	0.672564	575.11	561.26
12	810.99	1150	0.940095	2.92299	0.38803	4.0649	0.672564	575.43	561.87
12	810.99	1150	0.93405	3.05864	0.38059	4.0649	0.672564	575.29	561.14
12	810.99	1150	0.933465	3.06365	0.37734	4.0649	0.672564	575.4	561.18
12	810.99	1150	0.940225	2.9274	0.39708	4.0649	0.672564	575.57	561.6
12	810.99	1150	0.952835	3.14262	0.35067	4.0649	0.672564	575.57	561.54
12	810.99	1150	0.92716	3.04148	0.37668	4.0649	0.672564	574.54	561.2
12	810.99	1150	0.92937	3.03927	0.37021	4.0649	0.672564	574.85	561.34
12	810.99	1150	0.92859	3.0446	0.37113	4.0649	0.672564	574.88	561.25
12	810.99	1150	0.94848	3.11805	0.35762	4.0649	0.672564	575.33	561.27
12	810.99	1150	0.93054	3.04467	0.3681	4.0649	0.672564	575.02	561.36
12	810.99	1150	0.939055	2.92325	0.40836	4.0649	0.672564	576.06	562.14
12	810.99	1150	0.93548	3.07274	0.38371	4.0649	0.672564	575.36	561
12	810.99	1150	0.9295	3.02465	0.36833	4.0649	0.672564	574.77	561.31
12	810.99	1150	0.93665	3.07541	0.37947	4.0649	0.672564	575.38	561.11
12	810.99	1150	0.92573	3.05292	0.36223	4.0649	0.672564	574.79	560.64
12	810.99	1150	0.93444	3.0641	0.3646	4.0649	0.672564	574.3	560.15
12	810.99	1150	0.930995	3.04005	0.37245	4.0649	0.672564	574.46	561.4
12	810.99	1150	0.9334	3.06007	0.37615	4.0649	0.672564	574.9	561.02
12	810.99	1150	0.929825	3.04649	0.36419	4.0649	0.672564	574.73	561.39
12	810.99	1150	0.928395	3.03667	0.34824	4.0649	0.672564	574.05	560.65
12	810.99	1150	0.92027	3.01451	0.36308	4.0649	0.672564	574.22	561.52
12	810.99	1150	0.928265	3.03888	0.37369	4.0649	0.672564	574.61	561.24
12	810.99	1150	0.92508	3.01437	0.36449	4.0649	0.672564	574.1	561.54
12	810.99	1150	0.925795	3.0433	0.36942	4.0649	0.672564	575.03	561.52
12	810.99	1150	0.92586	3.01424	0.36604	4.0649	0.672564	574.56	561.6
12	810.99	1150	0.925925	3.01451	0.36645	4.0649	0.672564	574.52	561.38
12	810.99	1150	0.93171	3.0472	0.36374	4.0649	0.672564	574.87	561.62
12	810.99	1150	0.943345	3.07924	0.34344	4.0649	0.672564	575.59	560.77
12	810.99	1150	0.925015	3.02048	0.36617	4.0649	0.672564	574.36	561.5
12	810.99	1150	0.925015	3.02016	0.371	4.0649	0.672564	574.91	561.37
12	810.99	1150	0.92599	3.01704	0.36498	4.0649	0.672564	574.54	561.34
12	810.99	1150	0.933465	3.04232	0.37696	4.0649	0.672564	574.86	561.12
12	810.99	1150	0.92326	3.01561	0.3631	4.0649	0.672564	574.66	561.55
12	810.99	1150	0.929565	3.04629	0.3762	4.0649	0.672564	575.02	561.35
12	810.99	1150	0.93249	3.04324	0.36253	4.0649	0.672564	574.88	561.46
12	810.99	1150	0.94172	3.09946	0.36505	4.0649	0.672564	575.24	561.38
12	810.99	1150	0.924365	3.02946	0.34663	4.0649	0.672564	573.73	560.49
12	810.99	1150	0.93054	3.01984	0.36959	4.0649	0.672564	574.95	561.34
12	810.99	1150	0.93626	3.07457	0.39149	4.0649	0.672564	575.71	561.01
12	810.99	1150	0.9269	3.02185	0.3645	4.0649	0.672564	574.57	561.29
12	810.99	1150	0.929305	3.03914	0.37084	4.0649	0.672564	574.73	561.38
12	810.99	1150	0.94211	2.92519	0.39006	4.0649	0.672564	575.52	561.78
12	810.99	1150	0.93873	3.08802	0.36797	4.0649	0.672564	575.64	560.71
12	810.99	1150	0.949195	3.11428	0.3659	4.0649	0.672564	575.87	561.21
12	810.99	1150	0.930865	3.0379	0.36881	4.0649	0.672564	574.72	561.2
12	810.99	1150	0.928785	3.04258	0.38025	4.0649	0.672564	574.63	561.26
12	810.99	1150	0.93483	3.06534	0.3567	4.0649	0.672564	575.3	561.1
12	810.99	1150	0.943475	3.0979	0.36941	4.0649	0.672564	574.85	561.04
12	810.99	1150	0.936455	3.07099	0.35121	4.0649	0.672564	575.32	560.98
12	810.99	1150	0.926705	3.02217	0.36924	4.0649	0.672564	574.08	561.34
12	810.99	1150	0.93444	3.07522	0.3513	4.0649	0.672564	575.41	561.01
12	810.99	1150	0.928785	3.0457	0.36636	4.0649	0.672564	574.71	561.38
12	810.99	1150	0.92729	3.03465	0.3541	4.0649	0.672564	574.52	560.1
12	810.99	1150	0.938015	3.09862	0.38363	4.0649	0.672564	573.61	561.99
12	810.99	1150	0.928265	3.03296	0.36997	4.0649	0.672564	574.65	561.27
12	810.99	1150	0.945555	3.11149	0.35767	4.0649	0.672564	575.16	561.37
12	810.99	1150	0.934635	3.04863	0.36164	4.0649	0.672564	574.87	561.34
12	810.99	1150	0.932165	3.04987	0.35584	4.0649	0.672564	574.7	561.44
12	810.99	1150	0.925665	3.01437	0.36507	4.0649	0.672564	574.66	561.46
12	810.99	1150	0.937235	3.09913	0.34543	4.0649	0.672564	575.7	560.97
12	810.99	1150	0.95004	3.1241	0.34709	4.0649	0.672564	575.97	561.15
12	810.99	1150	0.943865	3.10732	0.34875	4.0649	0.672564	575.72	560.96
12	810.99	1150	0.930215	3.03706	0.36353	4.0649	0.672564	574.81	561.46
12	810.99	1150	0.934375	3.07177	0.3803	4.0649	0.672564	575.6	561.05
12	810.99	1150	0.93041	3.04194	0.36077	4.0649	0.672564	574.7	561.48
12	810.99	1150	0.932295	3.04174	0.37524	4.0649	0.672564	575.05	561.21
12	810.99	1150	0.92638	3.01853	0.35257	4.0649	0.672564	574.44	561.35
12	810.99	1150	0.93457	3.0641	0.37926	4.0649	0.672564	575.15	561.05
12	810.99	1150	0.93314	3.07307	0.38326	4.0649	0.672564	575.39	560.98
12	810.99	1150	0.946465	3.10336	0.35833	4.0649	0.672564	574.4	560.58
12	810.99	1150	0.94861	3.11675	0.35489	4.0649	0.672564	575.94	561.17
12	810.99	1150	0.9243	3.01834	0.36917	4.0649	0.672564	574.69	561.35
12	810.99	1150	0.93158	3.0667	0.38346	4.0649	0.672564	575.19	561.13
12	810.99	1150	0.94172	3.0914	0.35129	4.0649	0.672564	574.65	560.55
12	810.99	1150	0.95017	3.11857	0.352	4.0649	0.672564	575.66	561.42
12	810.99	1150	0.93899	3.0784	0.35822	4.0649	0.672564	573.9	562.08
12	810.99	1150	0.936325	3.06891	0.38746	4.0649	0.672564	575.41	561.07
13	720.81	1314.8	0.978705	2.35989	0.39593	3.2903	0.664968	572.45	229.33
13	720.81	1314.8	0.94848	2.36516	0.34537	3.2903	0.664968	571.39	229.5
13	720.81	1314.8	0.946335	2.37575	0.36658	3.2903	0.664968	571.81	229.16
13	720.81	1314.8	0.94757	2.37074	0.34712	3.2903	0.664968	571.51	229.55
13	720.81	1314.8	0.946205	2.36646	0.35565	3.2903	0.664968	571.82	229.31
13	720.81	1314.8	0.947375	2.36873	0.36444	3.2903	0.664968	572.02	229.05
13	720.81	1314.8	0.950235	2.37217	0.34983	3.2903	0.664968	571.41	229.53
13	720.81	1314.8	0.948935	2.36386	0.36007	3.2903	0.664968	571.81	229.28
13	720.81	1314.8	0.948805	2.36593	0.34431	3.2903	0.664968	571.64	229.38
13	720.81	1314.8	0.94705	2.36672	0.35059	3.2903	0.664968	571.56	229.32
13	720.81	1314.8	0.945425	2.36873	0.36038	3.2903	0.664968	572.05	229.04
13	720.81	1314.8	0.947765	2.37289	0.35252	3.2903	0.664968	571.79	228.98
13	720.81	1314.8	0.94718	2.36516	0.35325	3.2903	0.664968	571.42	229.41
13	720.81	1314.8	0.949325	2.36905	0.36335	3.2903	0.664968	571.45	229.28
13	720.81	1314.8	0.94887	2.37348	0.35686	3.2903	0.664968	571.92	229.14
13	720.81	1314.8	0.9451	2.37094	0.36958	3.2903	0.664968	571.93	229
13	720.81	1314.8	0.95498	2.38765	0.37243	3.2903	0.664968	571.95	229.78
13	720.81	1314.8	0.9451	2.37211	0.35036	3.2903	0.664968	571.24	229.44
13	720.81	1314.8	0.945425	2.36782	0.34971	3.2903	0.664968	571.46	229.55
13	720.81	1314.8	0.950885	2.37439	0.34556	3.2903	0.664968	571.74	229.01
13	720.81	1314.8	0.94328	2.36626	0.34759	3.2903	0.664968	571.55	229.44
13	720.81	1314.8	0.9763	2.35033	0.41239	3.2903	0.664968	572.89	229.25
13	720.81	1314.8	0.951665	2.3712	0.3456	3.2903	0.664968	571.4	229.5
13	720.81	1314.8	0.957125	2.38647	0.34558	3.2903	0.664968	572.19	229.45
13	720.81	1314.8	0.94835	2.36437	0.35245	3.2903	0.664968	571.44	229.55
13	720.81	1314.8	0.94679	2.36555	0.34633	3.2903	0.664968	571.82	229.45
13	720.81	1314.8	0.97643	2.35306	0.40923	3.2903	0.664968	572.88	229.29
13	720.81	1314.8	0.942955	2.36971	0.34439	3.2903	0.664968	571.81	229.07
13	720.81	1314.8	0.978575	2.35534	0.41326	3.2903	0.664968	572.47	229.25
13	720.81	1314.8	0.95082	2.36685	0.36007	3.2903	0.664968	571.88	229.35
13	720.81	1314.8	0.97461	2.35398	0.39451	3.2903	0.664968	572.13	229.45
13	720.81	1314.8	0.94874	2.37685	0.35153	3.2903	0.664968	571.91	228.81
13	720.81	1314.8	0.950495	2.37322	0.36328	3.2903	0.664968	572.35	229.11
13	720.81	1314.8	0.946205	2.37081	0.34826	3.2903	0.664968	571.76	229.4
13	720.81	1314.8	0.951795	2.37497	0.36702	3.2903	0.664968	572.23	228.91
13	720.81	1314.8	0.948675	2.36379	0.35276	3.2903	0.664968	570.98	229.43
13	720.81	1314.8	0.94978	2.37035	0.3615	3.2903	0.664968	571.87	229.09
13	720.81	1314.8	0.949195	2.37114	0.36388	3.2903	0.664968	571.81	229.24
13	720.81	1314.8	0.97695	2.34988	0.40234	3.2903	0.664968	572.33	229.17
13	720.81	1314.8	0.94536	2.36931	0.36714	3.2903	0.664968	571.95	229.05
13	720.81	1314.8	0.94419	2.36788	0.35767	3.2903	0.664968	572.18	228.74
13	720.81	1314.8	0.980265	2.35918	0.41223	3.2903	0.664968	572.4	229.26
13	720.81	1314.8	0.978315	2.36307	0.39626	3.2903	0.664968	572.84	229.25
13	720.81	1314.8	0.977145	2.34851	0.41527	3.2903	0.664968	572.63	229.31
13	720.81	1314.8	0.948805	2.36678	0.34435	3.2903	0.664968	571.59	229.35
13	720.81	1314.8	0.977015	2.35774	0.40736	3.2903	0.664968	573.01	229.18
13	720.81	1314.8	0.94796	2.36938	0.36138	3.2903	0.664968	571.46	229.28
13	720.81	1314.8	0.94705	2.36847	0.36324	3.2903	0.664968	571.97	228.98
13	720.81	1314.8	0.954265	2.37107	0.37102	3.2903	0.664968	571.83	228.76
13	720.81	1314.8	0.948805	2.36931	0.35447	3.2903	0.664968	571.77	229.52
13	720.81	1314.8	0.9828	2.36217	0.39183	3.2903	0.664968	572.54	229.26
13	720.81	1314.8	0.949845	2.36347	0.37249	3.2903	0.664968	571.41	229.51
13	720.81	1314.8	0.95472	2.38992	0.35595	3.2903	0.664968	572.26	229.25
13	720.81	1314.8	0.953875	2.36899	0.35265	3.2903	0.664968	571.63	229.33
13	720.81	1314.8	0.94757	2.36704	0.37224	3.2903	0.664968	571.17	229.61
13	720.81	1314.8	0.94718	2.3634	0.35462	3.2903	0.664968	571.22	229.55
13	720.81	1314.8	0.94627	2.37029	0.36053	3.2903	0.664968	572.1	228.99
13	720.81	1314.8	0.950105	2.37348	0.34306	3.2903	0.664968	571.17	229.52
13	720.81	1314.8	0.9802	2.3567	0.41115	3.2903	0.664968	572.7	229.09
13	720.81	1314.8	0.9438	2.37074	0.35434	3.2903	0.664968	571.09	229.68
13	720.81	1314.8	0.953745	2.36535	0.34767	3.2903	0.664968	571.42	229.36
13	720.81	1314.8	0.9464	2.36574	0.34251	3.2903	0.664968	571.27	229.52
13	720.81	1314.8	0.95628	2.38609	0.36356	3.2903	0.664968	572.41	229.13
13	720.81	1314.8	0.94575	2.36892	0.34339	3.2903	0.664968	571.91	228.91
13	720.81	1314.8	0.94926	2.37243	0.36203	3.2903	0.664968	571.71	229.09
13	720.81	1314.8	0.9503	2.36567	0.35032	3.2903	0.664968	571.27	229.49
13	720.81	1314.8	0.9477	2.36938	0.3491	3.2903	0.664968	571.49	229.54
13	720.81	1314.8	0.950105	2.36711	0.34849	3.2903	0.664968	571.23	229.43
13	720.81	1314.8	0.95251	2.39239	0.34767	3.2903	0.664968	572.53	229.47
13	720.81	1314.8	0.94497	2.36847	0.35576	3.2903	0.664968	571.61	229.55
13	720.81	1314.8	0.945425	2.36782	0.35069	3.2903	0.664968	571.89	229.21
13	720.81	1314.8	0.977665	2.35794	0.41024	3.2903	0.664968	572.66	228.68
13	720.81	1314.8	0.944645	2.36691	0.34665	3.2903	0.664968	571.02	229.48
13	720.81	1314.8	0.94874	2.35976	0.35685	3.2903	0.664968	571.46	229.44
13	720.81	1314.8	0.947375	2.36698	0.35494	3.2903	0.664968	571.73	229.24
13	720.81	1314.8	0.956865	2.39421	0.35881	3.2903	0.664968	572.27	229.23
13	720.81	1314.8	0.945295	2.36723	0.34886	3.2903	0.664968	571.62	229.59
13	720.81	1314.8	0.952965	2.36691	0.36375	3.2903	0.664968	571.87	229.08
13	720.81	1314.8	0.97617	2.35176	0.39441	3.2903	0.664968	572.38	228.77
13	720.81	1314.8	0.947115	2.37289	0.36986	3.2903	0.664968	572.02	229.08
13	720.81	1314.8	0.947115	2.36593	0.35948	3.2903	0.664968	571.41	229.38
13	720.81	1314.8	0.94978	2.37399	0.35613	3.2903	0.664968	571.17	229.45
13	720.81	1314.8	0.94718	2.36834	0.35546	3.2903	0.664968	571.33	229.49
13	720.81	1314.8	0.957775	2.39337	0.34444	3.2903	0.664968	572.52	229.25
13	720.81	1314.8	0.945815	2.36899	0.35049	3.2903	0.664968	571.39	229.33
13	720.81	1314.8	0.948415	2.36334	0.34964	3.2903	0.664968	570.79	229.49
13	720.81	1314.8	0.977925	2.34936	0.38799	3.2903	0.664968	572.42	228.9
13	720.81	1314.8	0.95264	2.36723	0.37966	3.2903	0.664968	571.11	229.54
13	720.81	1314.8	0.94952	2.36892	0.34888	3.2903	0.664968	571.17	229.44
13	720.81	1314.8	0.944515	2.37419	0.3673	3.2903	0.664968	571.92	229.03
13	720.81	1314.8	0.947115	2.37309	0.37025	3.2903	0.664968	571.81	228.96
13	720.81	1314.8	0.94562	2.37393	0.36066	3.2903	0.664968	571.94	228.99
13	720.81	1314.8	0.97669	2.35242	0.41491	3.2903	0.664968	572.49	229.1
13	720.81	1314.8	0.979745	2.36151	0.41564	3.2903	0.664968	572.34	229.14
13	720.81	1314.8	0.986245	2.36009	0.41622	3.2903	0.664968	572.63	228.97
13	720.81	1314.8	0.94458	2.37296	0.35288	3.2903	0.664968	572.03	229.33
13	720.81	1314.8	0.98059	2.35554	0.39504	3.2903	0.664968	572.22	229.34
13	720.81	1314.8	0.945035	2.36262	0.37688	3.2903	0.664968	571.06	229.69
13	720.81	1314.8	0.94562	2.3714	0.36997	3.2903	0.664968	571.79	228.78
13	720.81	1314.8	0.974675	2.35189	0.4153	3.2903	0.664968	572.57	229.12
13	720.81	1314.8	0.954785	2.39154	0.3587	3.2903	0.664968	572.35	229.05
13	720.81	1314.8	0.948545	2.37283	0.34799	3.2903	0.664968	571.48	229.42
13	720.81	1314.8	0.950235	2.37166	0.35611	3.2903	0.664968	571.95	229.31
13	720.81	1314.8	0.975845	2.3634	0.41232	3.2903	0.664968	571.99	228.94
13	720.81	1314.8	0.942695	2.37529	0.3523	3.2903	0.664968	571.89	229.1
13	720.81	1314.8	0.94562	2.37296	0.37342	3.2903	0.664968	571.3	229.57
13	720.81	1314.8	0.94666	2.3632	0.35477	3.2903	0.664968	571.2	229.49
13	720.81	1314.8	0.952445	2.36977	0.37812	3.2903	0.664968	571.37	229.48
13	720.81	1314.8	0.95758	2.39356	0.35371	3.2903	0.664968	572.27	229.23
13	720.81	1314.8	0.947245	2.3632	0.35347	3.2903	0.664968	571.4	229.34
13	720.81	1314.8	0.94536	2.38147	0.35076	3.2903	0.664968	570.53	229.61
13	720.81	1314.8	0.94991	2.36879	0.34258	3.2903	0.664968	571.76	229.36
13	720.81	1314.8	0.948935	2.36665	0.34609	3.2903	0.664968	571.32	229.56
13	720.81	1314.8	0.947375	2.36619	0.35335	3.2903	0.664968	572.47	229.26
13	720.81	1314.8	0.948285	2.36529	0.34826	3.2903	0.664968	571.2	229.64
13	720.81	1314.8	0.948025	2.36918	0.34259	3.2903	0.664968	571.07	229.48
13	720.81	1314.8	0.94601	2.37185	0.34945	3.2903	0.664968	571.27	229.44
13	720.81	1314.8	0.95992	2.39258	0.36282	3.2903	0.664968	572.54	229.37
13	720.81	1314.8	0.947765	2.36918	0.35326	3.2903	0.664968	571.72	229.51
13	720.81	1314.8	0.94822	2.36944	0.38113	3.2903	0.664968	571.65	229.38
13	720.81	1314.8	0.97266	2.35235	0.41405	3.2903	0.664968	572.59	228.89
13	720.81	1314.8	0.949585	2.37016	0.3578	3.2903	0.664968	572.12	229.04
13	720.81	1314.8	0.948025	2.37283	0.35044	3.2903	0.664968	571.46	229.51
13	720.81	1314.8	0.948805	2.37354	0.35626	3.2903	0.664968	571.47	229.44
13	720.81	1314.8	0.94549	2.366	0.34579	3.2903	0.664968	571.49	229.34
13	720.81	1314.8	0.980785	2.35892	0.39943	3.2903	0.664968	572.75	229.32
13	720.81	1314.8	0.97734	2.35898	0.41292	3.2903	0.664968	572.19	229.18
13	720.81	1314.8	0.973765	2.34787	0.40264	3.2903	0.664968	570.55	229.57
13	720.81	1314.8	0.97396	2.34897	0.41294	3.2903	0.664968	572.49	228.91
13	720.81	1314.8	0.94965	2.36905	0.35487	3.2903	0.664968	571.76	229.26
13	720.81	1314.8	0.946985	2.37029	0.37174	3.2903	0.664968	572.05	228.86
13	720.81	1314.8	0.950755	2.37399	0.34518	3.2903	0.664968	571.82	228.53
13	720.81	1314.8	0.9477	2.37003	0.35146	3.2903	0.664968	571.77	229.01
13	720.81	1314.8	0.944255	2.37601	0.36558	3.2903	0.664968	572.09	228.91
13	720.81	1314.8	0.978835	2.35404	0.41667	3.2903	0.664968	572.82	229.14
13	720.81	1314.8	0.951795	2.37698	0.34882	3.2903	0.664968	572.44	228.75
13	720.81	1314.8	0.94627	2.37042	0.35735	3.2903	0.664968	571.23	229.37
13	720.81	1314.8	0.950885	2.36925	0.35182	3.2903	0.664968	571.51	229.45
13	720.81	1314.8	0.97903	2.35196	0.41386	3.2903	0.664968	572.52	229.03
13	720.81	1314.8	0.946985	2.36736	0.34523	3.2903	0.664968	571.18	229.65
13	720.81	1314.8	0.94809	2.36841	0.35065	3.2903	0.664968	571.08	229.68
13	720.81	1314.8	0.94627	2.36386	0.3508	3.2903	0.664968	570.82	229.48
13	720.81	1314.8	0.945425	2.36723	0.34962	3.2903	0.664968	571.14	229.6
13	720.81	1314.8	0.960115	2.39233	0.34947	3.2903	0.664968	572.55	229.25
13	720.81	1314.8	0.945035	2.36802	0.35919	3.2903	0.664968	571.61	229.47
13	720.81	1314.8	0.944645	2.36509	0.36026	3.2903	0.664968	571.74	229.28
13	720.81	1314.8	0.97851	2.34533	0.39692	3.2903	0.664968	572.53	228.66
13	720.81	1314.8	0.945425	2.36899	0.36087	3.2903	0.664968	571.92	229.05
13	720.81	1314.8	0.94484	2.36542	0.34376	3.2903	0.664968	571.01	229.56
13	720.81	1314.8	0.946205	2.36984	0.34923	3.2903	0.664968	571.46	229.46
13	720.81	1314.8	0.94393	2.36775	0.34713	3.2903	0.664968	571.43	229.65
13	720.81	1314.8	0.977665	2.35216	0.38616	3.2903	0.664968	573.31	228.53
13	720.81	1314.8	0.954005	2.39102	0.35738	3.2903	0.664968	572.47	229.14
13	720.81	1314.8	0.94939	2.37465	0.34765	3.2903	0.664968	571.54	229.64
13	720.81	1314.8	0.948155	2.36873	0.34988	3.2903	0.664968	571.97	229.29
13	720.81	1314.8	0.97448	2.35196	0.41332	3.2903	0.664968	572.43	229.01
13	720.81	1314.8	0.943735	2.38076	0.36221	3.2903	0.664968	571.97	228.91
13	720.81	1314.8	0.949585	2.36262	0.34962	3.2903	0.664968	570.97	229.45
13	720.81	1314.8	0.951145	2.36457	0.35685	3.2903	0.664968	570.81	229.66
13	720.81	1314.8	0.95004	2.36223	0.35054	3.2903	0.664968	571.29	229.51
13	720.81	1314.8	0.95992	2.39596	0.3431	3.2903	0.664968	572.38	228.93
13	720.81	1314.8	0.949455	2.36691	0.34944	3.2903	0.664968	571.27	229.65
13	720.81	1314.8	0.945815	2.36841	0.35087	3.2903	0.664968	571.52	229.58
13	720.81	1314.8	0.97721	2.35196	0.39933	3.2903	0.664968	572.29	228.92
13	720.81	1314.8	0.949455	2.36574	0.34969	3.2903	0.664968	571.07	229.4
13	720.81	1314.8	0.951015	2.36841	0.34757	3.2903	0.664968	571.22	229.44
13	720.81	1314.8	0.94991	2.36854	0.35621	3.2903	0.664968	571.99	229.12
13	720.81	1314.8	0.948025	2.36314	0.36541	3.2903	0.664968	572.1	229
13	720.81	1314.8	0.948545	2.36775	0.35043	3.2903	0.664968	571.57	228.99
13	720.81	1314.8	0.977015	2.36437	0.40241	3.2903	0.664968	572.53	229.13
13	720.81	1314.8	0.98319	2.3632	0.41981	3.2903	0.664968	571.36	229.67
13	720.81	1314.8	0.97994	2.35112	0.41312	3.2903	0.664968	572.47	229.09
13	720.81	1314.8	0.946335	2.35963	0.36039	3.2903	0.664968	572.12	229.4
13	720.81	1314.8	0.976885	2.35398	0.41131	3.2903	0.664968	572.28	229.1
13	720.81	1314.8	0.94562	2.3636	0.35632	3.2903	0.664968	571.25	229.52
13	720.81	1314.8	0.94588	2.36834	0.34767	3.2903	0.664968	571.96	228.85
13	720.81	1314.8	0.945165	2.36542	0.37013	3.2903	0.664968	571.94	228.91
13	720.81	1314.8	0.979095	2.35443	0.41153	3.2903	0.664968	572.58	229.09
13	720.81	1314.8	0.9581	2.39532	0.35989	3.2903	0.664968	572.23	229.3
13	720.81	1314.8	0.947505	2.37048	0.35318	3.2903	0.664968	571.3	229.36
13	720.81	1314.8	0.95056	2.38335	0.36609	3.2903	0.664968	571.12	228.78
13	720.81	1314.8	0.975455	2.34923	0.41637	3.2903	0.664968	572.49	229.02
13	720.81	1314.8	0.942565	2.36964	0.34805	3.2903	0.664968	571.25	229.64
13	720.81	1314.8	0.945425	2.37179	0.36394	3.2903	0.664968	571.44	229.29
13	720.81	1314.8	0.945035	2.36756	0.35874	3.2903	0.664968	571.37	229.38
13	720.81	1314.8	0.94874	2.37419	0.34672	3.2903	0.664968	572.15	228.7
13	720.81	1314.8	0.94991	2.37367	0.34564	3.2903	0.664968	572.04	229.37
13	720.81	1314.8	0.94614	2.3701	0.3698	3.2903	0.664968	571.47	229.54
13	720.81	1314.8	0.94874	2.37491	0.35307	3.2903	0.664968	571.73	228.93
13	720.81	1314.8	0.95043	2.36918	0.35897	3.2903	0.664968	571.46	229.39
13	720.81	1314.8	0.94354	2.36788	0.36182	3.2903	0.664968	571.7	229.2
13	720.81	1314.8	0.947375	2.36847	0.36268	3.2903	0.664968	571.94	229.19
13	720.81	1314.8	0.947245	2.36944	0.36706	3.2903	0.664968	572.11	229.03
13	720.81	1314.8	0.948935	2.38205	0.34452	3.2903	0.664968	572.3	228.8
13	720.81	1314.8	0.950365	2.3736	0.34484	3.2903	0.664968	571.55	229.42
13	720.81	1314.8	0.948415	2.36294	0.35385	3.2903	0.664968	571.61	229.23
13	720.81	1314.8	0.955825	2.38258	0.34728	3.2903	0.664968	571.61	229.33
13	720.81	1314.8	0.946335	2.36399	0.34805	3.2903	0.664968	571.52	229.41
13	720.81	1314.8	0.951535	2.37978	0.34075	3.2903	0.664968	572.43	228.91
13	720.81	1314.8	0.95095	2.37887	0.37448	3.2903	0.664968	572.12	228.7
13	720.81	1314.8	0.946985	2.37516	0.34394	3.2903	0.664968	572.31	228.81
13	720.81	1314.8	0.97981	2.35599	0.4017	3.2903	0.664968	572.29	229.22
13	720.81	1314.8	0.95017	2.38153	0.34324	3.2903	0.664968	571.53	228.81
13	720.81	1314.8	0.958165	2.38745	0.35272	3.2903	0.664968	572.44	229.22
13	720.81	1314.8	0.976495	2.3465	0.39451	3.2903	0.664968	571.17	229.27
13	720.81	1314.8	0.947505	2.36301	0.3439	3.2903	0.664968	571.93	229.35
13	720.81	1314.8	0.951795	2.37322	0.3673	3.2903	0.664968	571.88	228.97
13	720.81	1314.8	0.950235	2.36841	0.34698	3.2903	0.664968	572.18	228.69
13	720.81	1314.8	0.948805	2.37926	0.35861	3.2903	0.664968	572.22	229.01
13	720.81	1314.8	0.97552	2.35495	0.41566	3.2903	0.664968	572.31	228.95
13	720.81	1314.8	0.961935	2.4011	0.34492	3.2903	0.664968	572.51	228.93
13	720.81	1314.8	0.954785	2.38036	0.36875	3.2903	0.664968	572.12	228.98
13	720.81	1314.8	0.94822	2.3686	0.34853	3.2903	0.664968	571.32	229.45
13	720.81	1314.8	0.94835	2.3738	0.35765	3.2903	0.664968	570.23	230.31
13	720.81	1314.8	0.94744	2.36652	0.3468	3.2903	0.664968	571.45	229.35
13	720.81	1314.8	0.94354	2.37127	0.37842	3.2903	0.664968	571.26	229.63
13	720.81	1314.8	0.947765	2.37217	0.38197	3.2903	0.664968	570.88	229.56
13	720.81	1314.8	0.98085	2.36463	0.41291	3.2903	0.664968	571.97	228.96
13	720.81	1314.8	0.95017	2.37764	0.34547	3.2903	0.664968	571.97	228.71
13	720.81	1314.8	0.948545	2.36944	0.3587	3.2903	0.664968	571.42	229.2
13	720.81	1314.8	0.94783	2.36496	0.35231	3.2903	0.664968	571.48	229.57
13	720.81	1314.8	0.946465	2.36815	0.34032	3.2903	0.664968	570.18	228.47
13	720.81	1314.8	0.94965	2.36938	0.35331	3.2903	0.664968	571.06	229.52
13	720.81	1314.8	0.94861	2.36691	0.34881	3.2903	0.664968	571.24	229.6
13	720.81	1314.8	0.949195	2.3636	0.35267	3.2903	0.664968	571.21	229.36
13	720.81	1314.8	0.947635	2.36886	0.34982	3.2903	0.664968	571.26	229.45
13	720.81	1314.8	0.948935	2.37432	0.34318	3.2903	0.664968	572.1	228.72
13	720.81	1314.8	0.94341	2.36665	0.35603	3.2903	0.664968	571.24	229.39
13	720.81	1314.8	0.944255	2.36463	0.34839	3.2903	0.664968	571.38	229.43
13	720.81	1314.8	0.94887	2.36509	0.36153	3.2903	0.664968	571.82	229.31
13	720.81	1314.8	0.94692	2.36717	0.34556	3.2903	0.664968	571.44	229.36
13	720.81	1314.8	0.97838	2.35924	0.41904	3.2903	0.664968	572.28	228.95
13	720.81	1314.8	0.975455	2.35371	0.40346	3.2903	0.664968	572.66	229.34
13	720.81	1314.8	0.951015	2.37133	0.3468	3.2903	0.664968	571.73	228.83
13	720.81	1314.8	0.975975	2.36099	0.41153	3.2903	0.664968	572.76	229.05
13	720.81	1314.8	0.948675	2.36997	0.35365	3.2903	0.664968	571.58	229.35
13	720.81	1314.8	0.954005	2.3879	0.36466	3.2903	0.664968	572.73	229.01
13	720.81	1314.8	0.94562	2.36918	0.35033	3.2903	0.664968	571.49	229.35
13	720.81	1314.8	0.955305	2.3842	0.36091	3.2903	0.664968	572.11	229.06
13	720.81	1314.8	0.94874	2.36886	0.36286	3.2903	0.664968	572.17	229.03
13	720.81	1314.8	0.944385	2.37179	0.36027	3.2903	0.664968	571.86	228.99
13	720.81	1314.8	0.950365	2.37536	0.37281	3.2903	0.664968	572.23	228.86
13	720.81	1314.8	0.97786	2.36347	0.41382	3.2903	0.664968	572.53	229.1
13	720.81	1314.8	0.96499	2.40422	0.35159	3.2903	0.664968	572.13	229.27
13	720.81	1314.8	0.947765	2.38102	0.3497	3.2903	0.664968	572.37	228.64
13	720.81	1314.8	0.95706	2.38557	0.36903	3.2903	0.664968	571.66	228.95
13	720.81	1314.8	0.97864	2.36132	0.41118	3.2903	0.664968	572.6	228.91
13	720.81	1314.8	0.948805	2.36905	0.3447	3.2903	0.664968	571.21	229.57
13	720.81	1314.8	0.949	2.37816	0.36078	3.2903	0.664968	572.12	228.89
13	720.81	1314.8	0.980265	2.36165	0.41276	3.2903	0.664968	572.5	229.13
13	720.81	1314.8	0.954785	2.37893	0.35207	3.2903	0.664968	571.37	229.25
13	720.81	1314.8	0.950625	2.36802	0.35505	3.2903	0.664968	571.67	229.27
13	720.81	1314.8	0.97825	2.36223	0.38862	3.2903	0.664968	573.07	229.35
13	720.81	1314.8	0.95004	2.3712	0.34822	3.2903	0.664968	570.3	229.57
13	720.81	1314.8	0.944905	2.36756	0.35608	3.2903	0.664968	571.64	229.36
13	720.81	1314.8	0.94926	2.3701	0.35457	3.2903	0.664968	571.44	229.57
13	720.81	1314.8	0.976495	2.36106	0.41097	3.2903	0.664968	572.66	228.9
13	720.81	1314.8	0.951665	2.37439	0.34521	3.2903	0.664968	572.15	228.77
13	720.81	1314.8	0.949065	2.36711	0.35582	3.2903	0.664968	571.93	229.3
13	720.81	1314.8	0.94705	2.36775	0.34983	3.2903	0.664968	571.38	229.51
13	720.81	1314.8	0.939965	2.3779	0.34323	3.2903	0.664968	571.09	227.86
13	720.81	1314.8	0.949845	2.36587	0.35058	3.2903	0.664968	571.62	229.25
13	720.81	1314.8	0.94588	2.37621	0.36091	3.2903	0.664968	571.83	229.11
13	720.81	1314.8	0.946335	2.36593	0.36182	3.2903	0.664968	572.13	229.08
13	720.81	1314.8	0.948285	2.38199	0.36644	3.2903	0.664968	572.04	228.72
13	720.81	1314.8	0.94601	2.36431	0.34973	3.2903	0.664968	571.43	229.53
13	720.81	1314.8	0.948935	2.36665	0.35422	3.2903	0.664968	571.63	229.46
13	720.81	1314.8	0.9451	2.36268	0.35005	3.2903	0.664968	571.77	229.44
13	720.81	1314.8	0.94861	2.38258	0.35939	3.2903	0.664968	572.22	229.12
13	720.81	1314.8	0.95186	2.37666	0.34172	3.2903	0.664968	572.14	228.88
13	720.81	1314.8	0.953485	2.37172	0.37208	3.2903	0.664968	571.92	228.67
13	720.81	1314.8	0.94926	2.37822	0.36631	3.2903	0.664968	572.25	228.82
13	720.81	1314.8	0.954395	2.37452	0.35447	3.2903	0.664968	571.04	228.26
13	720.81	1314.8	0.95602	2.38219	0.36157	3.2903	0.664968	572.1	229.21
13	720.81	1314.8	1.00425	2.44257	0.39923	3.2903	0.664968	571.6	228.52
13	720.81	1314.8	0.951535	2.38693	0.35217	3.2903	0.664968	572.08	229.25
13	720.81	1314.8	0.946855	2.3764	0.35159	3.2903	0.664968	571.76	229.41
13	720.81	1314.8	0.94978	2.37211	0.36746	3.2903	0.664968	571.87	228.9
13	720.81	1314.8	0.948545	2.37289	0.34602	3.2903	0.664968	571.8	228.75
13	720.81	1314.8	0.948025	2.37946	0.37038	3.2903	0.664968	572.3	228.87
13	720.81	1314.8	0.974805	2.35411	0.41426	3.2903	0.664968	572.69	228.88
13	720.81	1314.8	0.96122	2.40461	0.34532	3.2903	0.664968	572.51	229.42
13	720.81	1314.8	0.950755	2.38322	0.36642	3.2903	0.664968	572.12	228.8
13	720.81	1314.8	0.947505	2.36749	0.36036	3.2903	0.664968	571.34	229.44
13	720.81	1314.8	0.95693	2.38713	0.35169	3.2903	0.664968	571.99	229.25
13	720.81	1314.8	0.947375	2.37179	0.34774	3.2903	0.664968	571.51	229.36
13	720.81	1314.8	0.94718	2.36626	0.34588	3.2903	0.664968	571.51	229.53
13	720.81	1314.8	0.94835	2.36548	0.37949	3.2903	0.664968	571.13	229.51
13	720.81	1314.8	0.977795	2.35508	0.41572	3.2903	0.664968	572.89	228.63
13	720.81	1314.8	0.95056	2.37081	0.34204	3.2903	0.664968	572.02	228.68
13	720.81	1314.8	0.948675	2.36503	0.3471	3.2903	0.664968	571.42	229.29
13	720.81	1314.8	0.98046	2.35989	0.3936	3.2903	0.664968	572.55	229.32
13	720.81	1314.8	0.94822	2.37256	0.35894	3.2903	0.664968	571.35	229.24
13	720.81	1314.8	0.94614	2.36756	0.36535	3.2903	0.664968	571.89	229.28
13	720.81	1314.8	0.94731	2.36958	0.35992	3.2903	0.664968	572.01	229.21
13	720.81	1314.8	0.94549	2.36411	0.36643	3.2903	0.664968	572.19	229.01
13	720.81	1314.8	0.945685	2.36223	0.34875	3.2903	0.664968	570.79	229.41
13	720.81	1314.8	0.94562	2.36529	0.36475	3.2903	0.664968	571.52	229.29
13	720.81	1314.8	0.980135	2.36281	0.40782	3.2903	0.664968	572.92	229.18
13	720.81	1314.8	0.966745	2.41768	0.34879	3.2903	0.664968	572.57	228.78
13	720.81	1314.8	0.94562	2.37698	0.34398	3.2903	0.664968	571.53	228.5
13	720.81	1314.8	0.950625	2.37822	0.36706	3.2903	0.664968	572.27	228.96
13	720.81	1314.8	0.978575	2.35157	0.41318	3.2903	0.664968	572.5	229
13	720.81	1314.8	0.94562	2.37647	0.34876	3.2903	0.664968	572.29	228.66
13	720.81	1314.8	0.94211	2.36567	0.35525	3.2903	0.664968	570.84	229.56
13	720.81	1314.8	0.946725	2.36717	0.34979	3.2903	0.664968	571.65	229.14
13	720.81	1314.8	0.950365	2.37965	0.35437	3.2903	0.664968	571.33	228.32
13	720.81	1314.8	0.94835	2.36613	0.35897	3.2903	0.664968	571.95	229.33
13	720.81	1314.8	0.970775	2.41787	0.34723	3.2903	0.664968	572.22	229.31
13	720.81	1314.8	0.952835	2.36522	0.36231	3.2903	0.664968	571.17	229.28
13	720.81	1314.8	0.944645	2.37283	0.36105	3.2903	0.664968	571.94	229.2
13	720.81	1314.8	0.94575	2.37035	0.36738	3.2903	0.664968	571.59	228.99
13	720.81	1314.8	0.948675	2.36347	0.35724	3.2903	0.664968	572.13	229.02
13	720.81	1314.8	0.9464	2.36964	0.35212	3.2903	0.664968	570.96	229.48
13	720.81	1314.8	0.943475	2.37634	0.36399	3.2903	0.664968	572.36	228.96
13	720.81	1314.8	0.95407	2.39688	0.36377	3.2903	0.664968	572.44	229
13	720.81	1314.8	0.94952	2.36899	0.34653	3.2903	0.664968	572.35	228.81
13	720.81	1314.8	0.98124	2.36379	0.41538	3.2903	0.664968	572.66	229.34
13	720.81	1314.8	0.94237	2.36678	0.34461	3.2903	0.664968	571.37	229.44
13	720.81	1314.8	0.98046	2.35969	0.41275	3.2903	0.664968	572.61	229.1
13	720.81	1314.8	0.94822	2.36828	0.35182	3.2903	0.664968	571.18	229.62
13	720.81	1314.8	0.948935	2.36984	0.3496	3.2903	0.664968	570.76	229.54
13	720.81	1314.8	0.94757	2.37289	0.36365	3.2903	0.664968	571.62	229.11
13	720.81	1314.8	0.95823	2.37035	0.36417	3.2903	0.664968	571.77	228.98
13	720.81	1314.8	0.952315	2.3647	0.36782	3.2903	0.664968	571.59	229.32
13	720.81	1314.8	0.975585	2.34832	0.39212	3.2903	0.664968	572.96	229.3
13	720.81	1314.8	0.944515	2.36958	0.35765	3.2903	0.664968	571.77	229.16
13	720.81	1314.8	0.94796	2.37562	0.34788	3.2903	0.664968	571.21	229.26
13	720.81	1314.8	0.949975	2.37237	0.35674	3.2903	0.664968	571.89	229.28
13	720.81	1314.8	0.950495	2.37198	0.35186	3.2903	0.664968	571.4	229.42
13	720.81	1314.8	0.94276	2.36548	0.3551	3.2903	0.664968	572.02	229.04
13	720.81	1314.8	0.94445	2.37647	0.35284	3.2903	0.664968	571.75	228.9
13	720.81	1314.8	0.94874	2.36548	0.36109	3.2903	0.664968	571.07	229.19
13	720.81	1314.8	0.97747	2.35332	0.40035	3.2903	0.664968	572.93	229.22
13	720.81	1314.8	0.96304	2.41898	0.35546	3.2903	0.664968	572.49	229.19
13	720.81	1314.8	0.945945	2.36762	0.36696	3.2903	0.664968	571.72	229.01
13	720.81	1314.8	0.946205	2.37042	0.3505	3.2903	0.664968	571.93	228.9
13	720.81	1314.8	0.94718	2.36931	0.36239	3.2903	0.664968	571.91	229.08
13	720.81	1314.8	0.94536	2.37516	0.35258	3.2903	0.664968	571.79	229.07
13	720.81	1314.8	0.94653	2.366	0.35901	3.2903	0.664968	570.79	229.53
13	720.81	1314.8	0.979485	2.35625	0.41635	3.2903	0.664968	572.76	229.14
13	720.81	1314.8	0.951665	2.36847	0.35069	3.2903	0.664968	571.68	229.4
13	720.81	1314.8	0.94653	2.3701	0.35366	3.2903	0.664968	571.13	229.29
13	720.81	1314.8	0.96681	2.41793	0.36084	3.2903	0.664968	572.97	229.04
13	720.81	1314.8	0.948675	2.38628	0.36507	3.2903	0.664968	572.41	228.82
13	720.81	1314.8	0.947895	2.3649	0.34715	3.2903	0.664968	571.65	229.33
13	720.81	1314.8	0.949455	2.37302	0.36596	3.2903	0.664968	571.69	229.12
13	720.81	1314.8	0.951925	2.36834	0.36505	3.2903	0.664968	571.61	229.09
13	720.81	1314.8	0.95004	2.36769	0.35645	3.2903	0.664968	570.9	229.56
13	720.81	1314.8	0.950625	2.3779	0.35124	3.2903	0.664968	571.45	228.7
13	720.81	1314.8	0.94497	2.36626	0.34565	3.2903	0.664968	571.69	229.41
13	720.81	1314.8	0.97682	2.42424	0.35751	3.2903	0.664968	572.19	228.98
13	720.81	1314.8	0.947765	2.37042	0.36149	3.2903	0.664968	571.26	229.24
13	720.81	1314.8	0.949325	2.37419	0.35441	3.2903	0.664968	571.36	229.35
13	720.81	1314.8	0.948025	2.3801	0.36637	3.2903	0.664968	572.1	228.91
13	720.81	1314.8	0.950235	2.37146	0.34552	3.2903	0.664968	572.33	228.8
13	720.81	1314.8	0.94744	2.36626	0.35577	3.2903	0.664968	571.09	229.58
13	720.81	1314.8	0.975715	2.35131	0.4022	3.2903	0.664968	572.46	229.4
13	720.81	1314.8	0.947375	2.3699	0.35199	3.2903	0.664968	571.43	229.32
13	720.81	1314.8	0.97825	2.36197	0.41664	3.2903	0.664968	573.19	229.13
13	720.81	1314.8	0.95537	2.37289	0.34525	3.2903	0.664968	571.28	228.52
13	720.81	1314.8	0.948155	2.36307	0.36274	3.2903	0.664968	571.45	229.31
13	720.81	1314.8	0.945555	2.36723	0.34991	3.2903	0.664968	571.17	229.37
13	720.81	1314.8	0.95238	2.37478	0.35003	3.2903	0.664968	571.17	229.45
13	720.81	1314.8	0.950235	2.36879	0.35739	3.2903	0.664968	571.66	229.09
13	720.81	1314.8	0.951275	2.37406	0.34859	3.2903	0.664968	571.5	229.37
13	720.81	1314.8	0.947505	2.36749	0.352	3.2903	0.664968	571.39	229.53
13	720.81	1314.8	0.94874	2.36886	0.35202	3.2903	0.664968	571.03	229.21
13	720.81	1314.8	0.963885	2.40455	0.353	3.2903	0.664968	572.5	229.04
13	720.81	1314.8	0.950105	2.37452	0.36237	3.2903	0.664968	571.11	229.11
13	720.81	1314.8	0.94562	2.37302	0.36726	3.2903	0.664968	572.25	228.91
13	720.81	1314.8	0.94809	2.36574	0.36805	3.2903	0.664968	571.77	229.22
13	720.81	1314.8	0.942955	2.37354	0.36094	3.2903	0.664968	571.94	228.92
13	720.81	1314.8	0.94861	2.37458	0.34416	3.2903	0.664968	571.01	229.65
13	720.81	1314.8	0.941395	2.37471	0.36246	3.2903	0.664968	571.24	229.35
13	720.81	1314.8	0.974675	2.34956	0.403	3.2903	0.664968	572.82	229.16
13	720.81	1314.8	0.967135	2.41683	0.35258	3.2903	0.664968	572.72	229.31
13	720.81	1314.8	0.94835	2.37458	0.36156	3.2903	0.664968	571.58	229.27
13	720.81	1314.8	0.94991	2.37003	0.35423	3.2903	0.664968	571.23	229.44
13	720.81	1314.8	0.948415	2.3751	0.3504	3.2903	0.664968	571.87	228.77
13	720.81	1314.8	0.946595	2.36353	0.35109	3.2903	0.664968	571.07	229.55
13	720.81	1314.8	0.977535	2.35456	0.41176	3.2903	0.664968	572.7	228.83
13	720.81	1314.8	0.954655	2.37601	0.36613	3.2903	0.664968	571.37	228.79
13	720.81	1314.8	0.947765	2.36723	0.34907	3.2903	0.664968	571.14	229.39
13	720.81	1314.8	0.97292	2.42073	0.34338	3.2903	0.664968	572.44	228.79
13	720.81	1314.8	0.95069	2.37153	0.34884	3.2903	0.664968	571.4	229.37
13	720.81	1314.8	0.95394	2.37406	0.35836	3.2903	0.664968	572	229.02
13	720.81	1314.8	0.949975	2.36509	0.35933	3.2903	0.664968	572.15	229.06
13	720.81	1314.8	0.9451	2.37224	0.3607	3.2903	0.664968	572.03	229.09
13	720.81	1314.8	0.94744	2.36756	0.36151	3.2903	0.664968	570.98	229.41
13	720.81	1314.8	0.946855	2.37191	0.34691	3.2903	0.664968	571.37	229.67
13	720.81	1314.8	0.95121	2.38998	0.36554	3.2903	0.664968	572.41	229.25
13	720.81	1314.8	0.94471	2.36411	0.36198	3.2903	0.664968	571.26	229.11
13	720.81	1314.8	0.978705	2.35112	0.39256	3.2903	0.664968	573.24	228.49
13	720.81	1314.8	0.947895	2.3701	0.35017	3.2903	0.664968	571.55	229.33
13	720.81	1314.8	0.945165	2.36984	0.35959	3.2903	0.664968	571.71	229.28
13	720.81	1314.8	0.948025	2.35989	0.34513	3.2903	0.664968	570.97	229.74
13	720.81	1314.8	0.950105	2.36717	0.35359	3.2903	0.664968	571.14	229.5
13	720.81	1314.8	0.946465	2.37465	0.36815	3.2903	0.664968	571.98	229.14
13	720.81	1314.8	0.94679	2.37309	0.34804	3.2903	0.664968	571.29	229.56
13	720.81	1314.8	0.95173	2.36606	0.34977	3.2903	0.664968	571.69	229.3
13	720.81	1314.8	0.981435	2.358	0.39479	3.2903	0.664968	573.08	229.3
13	720.81	1314.8	0.945945	2.36743	0.35245	3.2903	0.664968	571.93	229.22
13	720.81	1314.8	0.94718	2.36424	0.34925	3.2903	0.664968	571.17	229.18
13	720.81	1314.8	0.94796	2.3727	0.35314	3.2903	0.664968	571.87	229.21
13	720.81	1314.8	0.946595	2.37256	0.37429	3.2903	0.664968	572.03	229.15
13	720.81	1314.8	0.94666	2.37081	0.34782	3.2903	0.664968	572.52	228.87
13	720.81	1314.8	0.94705	2.366	0.35009	3.2903	0.664968	571.78	228.96
13	720.81	1314.8	0.98085	2.3493	0.40061	3.2903	0.664968	572.85	229.28
13	720.81	1314.8	0.94692	2.3723	0.35912	3.2903	0.664968	571.37	229.34
13	720.81	1314.8	0.94926	2.36646	0.34777	3.2903	0.664968	570.91	228.18
13	720.81	1314.8	0.952185	2.3814	0.345	3.2903	0.664968	572.54	228.77
13	720.81	1314.8	0.98124	2.35781	0.41249	3.2903	0.664968	572.7	229.22
13	720.81	1314.8	0.94757	2.36775	0.35061	3.2903	0.664968	572	228.88
13	720.81	1314.8	0.949455	2.38069	0.34752	3.2903	0.664968	572.18	229.16
13	720.81	1314.8	0.980005	2.36022	0.40874	3.2903	0.664968	572.96	229.18
13	720.81	1314.8	0.96356	2.39128	0.34925	3.2903	0.664968	572.56	229.16
13	720.81	1314.8	0.95173	2.36743	0.35126	3.2903	0.664968	571.35	229.55
13	720.81	1314.8	0.94536	2.36815	0.349	3.2903	0.664968	571.05	229.7
13	720.81	1314.8	0.94068	2.36854	0.3594	3.2903	0.664968	571.42	228.88
13	720.81	1314.8	0.95771	2.39434	0.35597	3.2903	0.664968	572.21	229.11
13	720.81	1314.8	0.94523	2.36593	0.37289	3.2903	0.664968	571.08	229.72
13	720.81	1314.8	0.947245	2.36977	0.34494	3.2903	0.664968	571.19	229.6
13	720.81	1314.8	0.96291	2.38732	0.36086	3.2903	0.664968	572.57	229.17
13	720.81	1314.8	0.94952	2.3701	0.35365	3.2903	0.664968	571.18	229.54
13	720.81	1314.8	0.958815	2.38933	0.35396	3.2903	0.664968	572.37	229.34
13	720.81	1314.8	0.94783	2.36424	0.37527	3.2903	0.664968	571.23	229.7
13	720.81	1314.8	0.94653	2.37386	0.35825	3.2903	0.664968	571.35	229.27
13	720.81	1314.8	0.95082	2.37237	0.34577	3.2903	0.664968	572.12	229.03
13	720.81	1314.8	0.949585	2.37283	0.35443	3.2903	0.664968	572.36	228.76
13	720.81	1314.8	0.94614	2.36386	0.37415	3.2903	0.664968	570.65	229.8
13	720.81	1314.8	0.973505	2.35222	0.42168	3.2903	0.664968	572.29	228.84
13	720.81	1314.8	0.953225	2.36567	0.35406	3.2903	0.664968	571.21	229.4
13	720.81	1314.8	0.949975	2.36723	0.36182	3.2903	0.664968	571.33	229.34
13	720.81	1314.8	0.94887	2.36847	0.35449	3.2903	0.664968	571.38	229.33
13	720.81	1314.8	0.945815	2.37127	0.34945	3.2903	0.664968	571.5	229.59
13	720.81	1314.8	0.94653	2.36723	0.3522	3.2903	0.664968	571.31	229.5
13	720.81	1314.8	0.94666	2.36626	0.35699	3.2903	0.664968	571.23	229.34
13	720.81	1314.8	0.94822	2.36567	0.34827	3.2903	0.664968	571.27	229.33
13	720.81	1314.8	0.948675	2.36392	0.35299	3.2903	0.664968	571.38	229.36
13	720.81	1314.8	0.94978	2.36854	0.35705	3.2903	0.664968	571.65	229.43
13	720.81	1314.8	0.94965	2.37061	0.35703	3.2903	0.664968	571.01	229.58
13	720.81	1314.8	0.946725	2.37048	0.34806	3.2903	0.664968	571.38	229.26
13	720.81	1314.8	0.948155	2.366	0.37589	3.2903	0.664968	570.87	229.68
13	720.81	1314.8	0.947895	2.36503	0.35475	3.2903	0.664968	571.39	229.24
13	720.81	1314.8	0.97695	2.34702	0.40807	3.2903	0.664968	572.85	229.32
13	720.81	1314.8	0.94705	2.36841	0.35102	3.2903	0.664968	571.18	229.4
13	720.81	1314.8	0.948545	2.38076	0.35489	3.2903	0.664968	570.92	228.38
13	720.81	1314.8	0.98124	2.36327	0.40822	3.2903	0.664968	572.56	229.11
13	720.81	1314.8	0.97695	2.35892	0.41686	3.2903	0.664968	572.7	229.09
13	720.81	1314.8	0.95225	2.37854	0.35671	3.2903	0.664968	572.05	228.93
13	720.81	1314.8	0.94822	2.36977	0.35171	3.2903	0.664968	571.13	229.36
13	720.81	1314.8	0.97968	2.36386	0.4057	3.2903	0.664968	572.91	228.46
13	720.81	1314.8	0.947245	2.36522	0.34778	3.2903	0.664968	571.61	228.52
13	720.81	1314.8	0.947245	2.36873	0.35961	3.2903	0.664968	571.27	229.13
13	720.81	1314.8	0.943345	2.37087	0.35121	3.2903	0.664968	570.99	229.47
13	720.81	1314.8	0.948545	2.37061	0.34714	3.2903	0.664968	571.32	229.49
13	720.81	1314.8	0.94848	2.37003	0.35799	3.2903	0.664968	571.19	229.29
13	720.81	1314.8	0.94601	2.36503	0.37744	3.2903	0.664968	570.84	229.7
13	720.81	1314.8	0.946985	2.36879	0.34923	3.2903	0.664968	570.95	229.76
13	720.81	1314.8	0.946075	2.36743	0.34967	3.2903	0.664968	570.93	229.56
13	720.81	1314.8	0.94874	2.36749	0.34697	3.2903	0.664968	570.83	229.75
13	720.81	1314.8	0.946075	2.37465	0.35819	3.2903	0.664968	572.1	229.16
13	720.81	1314.8	0.961675	2.38316	0.35631	3.2903	0.664968	572.1	229.43
13	720.81	1314.8	0.951405	2.36815	0.3456	3.2903	0.664968	571.29	229.36
13	720.81	1314.8	0.94497	2.37133	0.34691	3.2903	0.664968	571.08	229.51
13	720.81	1314.8	0.9477	2.37191	0.36145	3.2903	0.664968	571.88	229.38
13	720.81	1314.8	0.956605	2.38959	0.34684	3.2903	0.664968	572.42	229.14
13	720.81	1314.8	0.94445	2.36717	0.34825	3.2903	0.664968	571	229.71
13	720.81	1314.8	0.94497	2.36951	0.35916	3.2903	0.664968	571.87	229.22
13	720.81	1314.8	0.949325	2.36314	0.35304	3.2903	0.664968	571.07	229.67
13	720.81	1314.8	0.945165	2.36626	0.35126	3.2903	0.664968	571.69	229.41
13	720.81	1314.8	0.97344	2.3506	0.41072	3.2903	0.664968	572.41	228.97
13	720.81	1314.8	0.94627	2.36918	0.34647	3.2903	0.664968	570.87	229.75
13	720.81	1314.8	0.95004	2.37237	0.3633	3.2903	0.664968	571.54	229.37
13	720.81	1314.8	0.949715	2.36659	0.35666	3.2903	0.664968	571.03	229.35
13	720.81	1314.8	0.9438	2.37068	0.36578	3.2903	0.664968	571.71	229.09
13	720.81	1314.8	0.978705	2.36041	0.40959	3.2903	0.664968	572.42	228.88
13	720.81	1314.8	0.944775	2.37068	0.36775	3.2903	0.664968	572.07	228.9
13	720.81	1314.8	0.94523	2.36522	0.37747	3.2903	0.664968	570.77	229.55
13	720.81	1314.8	0.98072	2.36061	0.40659	3.2903	0.664968	572.45	229.1
13	720.81	1314.8	0.94887	2.36828	0.3543	3.2903	0.664968	570.87	229.35
14	865.49	1154	0.93093	2.60351	0.40816	3.2122	0.629759	604.67	734.48
14	865.49	1154	0.92911	2.57894	0.41207	3.2122	0.629759	604.61	734.53
14	865.49	1154	0.92105	2.53688	0.41348	3.2122	0.629759	603.48	734.89
14	865.49	1154	0.925275	2.57003	0.40828	3.2122	0.629759	604.09	734.78
14	865.49	1154	0.944255	2.63191	0.40467	3.2122	0.629759	604.88	734.15
14	865.49	1154	0.97253	2.63451	0.44199	3.2122	0.629759	605.16	734.59
14	865.49	1154	0.923195	2.56646	0.40368	3.2122	0.629759	604.3	734.74
14	865.49	1154	0.97552	2.63016	0.44299	3.2122	0.629759	605.17	734.43
14	865.49	1154	0.91871	2.53604	0.41301	3.2122	0.629759	603.77	734.74
14	865.49	1154	0.974805	2.63068	0.44311	3.2122	0.629759	605.23	734.41
14	865.49	1154	0.92716	2.58317	0.40538	3.2122	0.629759	604.62	734.56
14	865.49	1154	0.97838	2.62899	0.44242	3.2122	0.629759	605.99	734.15
14	865.49	1154	0.92638	2.55872	0.39673	3.2122	0.629759	604.16	734.83
14	865.49	1154	0.93301	2.5987	0.4067	3.2122	0.629759	604.57	734.18
14	865.49	1154	0.972465	2.63432	0.44755	3.2122	0.629759	605.12	734.62
14	865.49	1154	0.922025	2.52928	0.41366	3.2122	0.629759	603.87	734.69
14	865.49	1154	0.97734	2.63146	0.43913	3.2122	0.629759	605.24	734.4
14	865.49	1154	0.926315	2.56834	0.4069	3.2122	0.629759	604.29	734.79
14	865.49	1154	0.927485	2.58381	0.41273	3.2122	0.629759	604.31	734.5
14	865.49	1154	0.922025	2.52941	0.4128	3.2122	0.629759	603.91	734.93
14	865.49	1154	0.923715	2.5714	0.40409	3.2122	0.629759	604.18	734.88
14	865.49	1154	0.97474	2.63354	0.44028	3.2122	0.629759	604.87	734.76
14	865.49	1154	0.94198	2.6325	0.40662	3.2122	0.629759	605.07	734.17
14	865.49	1154	0.9269	2.58356	0.41034	3.2122	0.629759	604.57	734.53
14	865.49	1154	0.975715	2.63068	0.44117	3.2122	0.629759	605.26	734.54
14	865.49	1154	0.94393	2.62607	0.40776	3.2122	0.629759	604.62	734.08
14	865.49	1154	0.917735	2.53032	0.41363	3.2122	0.629759	604	734.69
14	865.49	1154	0.929435	2.58349	0.41143	3.2122	0.629759	604.19	734.49
14	865.49	1154	0.94172	2.63146	0.39848	3.2122	0.629759	604.94	734.08
14	865.49	1154	0.91923	2.53051	0.41783	3.2122	0.629759	603.87	734.81
14	865.49	1154	0.964405	2.69763	0.39491	3.2122	0.629759	604.5	735.23
14	865.49	1154	0.928005	2.58505	0.4097	3.2122	0.629759	604.48	734.45
14	865.49	1154	0.921765	2.56035	0.41009	3.2122	0.629759	604.39	734.68
14	865.49	1154	0.93353	2.61573	0.40802	3.2122	0.629759	604.81	734.14
14	865.49	1154	0.96499	2.69477	0.39958	3.2122	0.629759	604.67	734.96
14	865.49	1154	0.94224	2.62795	0.39806	3.2122	0.629759	604.9	734.07
14	865.49	1154	0.96551	2.69912	0.39699	3.2122	0.629759	605.11	734.57
14	865.49	1154	0.97331	2.63068	0.43897	3.2122	0.629759	605.2	734.61
14	865.49	1154	0.97383	2.63185	0.43525	3.2122	0.629759	604.96	734.8
14	865.49	1154	0.9776	2.6297	0.44113	3.2122	0.629759	605.25	734.65
14	865.49	1154	0.939965	2.61814	0.40728	3.2122	0.629759	604.67	734.19
14	865.49	1154	0.92846	2.56627	0.40853	3.2122	0.629759	604.05	734.86
14	865.49	1154	0.97253	2.63445	0.44372	3.2122	0.629759	605.39	734.76
14	865.49	1154	0.92651	2.56828	0.40466	3.2122	0.629759	604.3	734.77
14	865.49	1154	0.93197	2.60474	0.40723	3.2122	0.629759	604.9	734.19
14	865.49	1154	0.930215	2.58174	0.40716	3.2122	0.629759	604.41	734.55
14	865.49	1154	0.972595	2.62763	0.43616	3.2122	0.629759	605.14	734.78
14	865.49	1154	0.97552	2.62912	0.44433	3.2122	0.629759	605.46	734.57
14	865.49	1154	0.97253	2.63178	0.43912	3.2122	0.629759	605.21	734.38
14	865.49	1154	0.975325	2.62925	0.44265	3.2122	0.629759	605.36	734.62
14	865.49	1154	0.93899	2.62977	0.41165	3.2122	0.629759	604.76	734.16
14	865.49	1154	0.920465	2.54917	0.40892	3.2122	0.629759	603.95	734.73
14	865.49	1154	0.968695	2.69685	0.38712	3.2122	0.629759	604.69	734.58
14	865.49	1154	0.933465	2.58668	0.40783	3.2122	0.629759	604.41	734.58
14	865.49	1154	0.925795	2.54722	0.4146	3.2122	0.629759	604.34	734.68
14	865.49	1154	0.97682	2.62743	0.43925	3.2122	0.629759	605.18	734.57
14	865.49	1154	0.96525	2.69015	0.39583	3.2122	0.629759	605.22	734.57
14	865.49	1154	0.942045	2.62665	0.40571	3.2122	0.629759	605.08	734.09
14	865.49	1154	0.924365	2.57192	0.40831	3.2122	0.629759	604.33	734.8
14	865.49	1154	0.938015	2.61216	0.41558	3.2122	0.629759	604.48	734.5
14	865.49	1154	0.93236	2.6026	0.40784	3.2122	0.629759	604.66	734.3
14	865.49	1154	0.93314	2.61072	0.409	3.2122	0.629759	604.73	734.3
14	865.49	1154	0.925665	2.58668	0.40805	3.2122	0.629759	604.3	734.45
14	865.49	1154	0.94497	2.62652	0.40559	3.2122	0.629759	604.77	734
14	865.49	1154	0.95992	2.61801	0.38491	3.2122	0.629759	604.87	735.5
14	865.49	1154	0.93574	2.60487	0.40861	3.2122	0.629759	604.51	734.4
14	865.49	1154	0.91806	2.53318	0.40972	3.2122	0.629759	603.96	734.83
14	865.49	1154	0.97383	2.63126	0.44143	3.2122	0.629759	605.12	734.51
14	865.49	1154	0.93353	2.60026	0.40793	3.2122	0.629759	604.63	734.28
14	865.49	1154	0.93899	2.6184	0.40622	3.2122	0.629759	604.67	734.45
14	865.49	1154	0.973505	2.63257	0.44521	3.2122	0.629759	605.16	734.59
14	865.49	1154	0.972465	2.63114	0.4386	3.2122	0.629759	605.32	734.72
14	865.49	1154	0.96122	2.69263	0.40143	3.2122	0.629759	605.13	734.6
14	865.49	1154	0.92833	2.56588	0.40988	3.2122	0.629759	604.16	734.85
14	865.49	1154	0.938275	2.6271	0.40393	3.2122	0.629759	604.92	734.1
14	865.49	1154	0.972335	2.62906	0.43954	3.2122	0.629759	605.41	734.45
14	865.49	1154	0.92508	2.55859	0.40833	3.2122	0.629759	604.02	734.93
14	865.49	1154	0.92105	2.53741	0.41407	3.2122	0.629759	603.63	734.84
14	865.49	1154	0.929955	2.60013	0.41742	3.2122	0.629759	604.41	734.53
14	865.49	1154	0.9334	2.58297	0.41028	3.2122	0.629759	604.37	734.64
14	865.49	1154	0.972595	2.63172	0.43887	3.2122	0.629759	605.44	734.78
14	865.49	1154	0.926835	2.53539	0.41357	3.2122	0.629759	603.98	734.76
14	865.49	1154	0.976365	2.63426	0.4332	3.2122	0.629759	605.31	734.66
14	865.49	1154	0.97474	2.62737	0.44538	3.2122	0.629759	605.14	734.69
14	865.49	1154	0.920205	2.53337	0.41066	3.2122	0.629759	604.13	734.65
14	865.49	1154	0.923715	2.5298	0.41657	3.2122	0.629759	603.86	734.69
14	865.49	1154	0.97084	2.63152	0.43209	3.2122	0.629759	605.68	734.48
14	865.49	1154	0.926705	2.58576	0.40783	3.2122	0.629759	604.48	734.66
14	865.49	1154	0.922285	2.55534	0.40229	3.2122	0.629759	604.09	734.64
14	865.49	1154	0.9737	2.63114	0.43712	3.2122	0.629759	605.49	734.7
14	865.49	1154	0.96486	2.68229	0.38949	3.2122	0.629759	604.91	734.53
14	865.49	1154	0.97578	2.63126	0.44676	3.2122	0.629759	605	734.63
14	865.49	1154	0.92131	2.53948	0.41608	3.2122	0.629759	603.98	734.79
14	865.49	1154	0.976105	2.63334	0.43958	3.2122	0.629759	605.25	734.44
14	865.49	1154	0.932295	2.59903	0.40947	3.2122	0.629759	604.73	734.45
14	865.49	1154	0.920595	2.54475	0.41261	3.2122	0.629759	603.97	734.56
14	865.49	1154	0.93379	2.65174	0.39362	3.2122	0.629759	604.14	734
14	865.49	1154	0.97526	2.63218	0.43643	3.2122	0.629759	605.16	734.96
14	865.49	1154	0.964665	2.68957	0.39268	3.2122	0.629759	604.87	734.68
14	865.49	1154	0.95134	2.66845	0.39572	3.2122	0.629759	603.19	735.39
14	865.49	1154	0.931905	2.59246	0.41279	3.2122	0.629759	604.39	734.51
14	865.49	1154	0.91923	2.55105	0.41402	3.2122	0.629759	603.73	734.74
14	865.49	1154	0.943085	2.63088	0.40613	3.2122	0.629759	604.84	734.18
14	865.49	1154	0.932815	2.60591	0.41105	3.2122	0.629759	604.76	734.31
14	865.49	1154	0.963105	2.69308	0.39506	3.2122	0.629759	605.08	734.54
14	865.49	1154	0.939445	2.62951	0.40546	3.2122	0.629759	604.91	734.17
14	865.49	1154	0.974285	2.62906	0.43558	3.2122	0.629759	605.37	734.81
14	865.49	1154	0.96109	2.69217	0.40065	3.2122	0.629759	604.86	734.46
14	865.49	1154	0.961155	2.69081	0.39354	3.2122	0.629759	605.14	734.32
14	865.49	1154	0.924235	2.56002	0.40614	3.2122	0.629759	604.11	734.63
14	865.49	1154	0.934375	2.60689	0.40847	3.2122	0.629759	604.87	734.34
14	865.49	1154	0.93548	2.60722	0.40709	3.2122	0.629759	604.78	734.34
14	865.49	1154	0.93327	2.60026	0.40886	3.2122	0.629759	604.75	734.43
14	865.49	1154	0.96395	2.69237	0.39329	3.2122	0.629759	604.98	734.39
14	865.49	1154	0.92924	2.58277	0.40992	3.2122	0.629759	604.25	734.48
14	865.49	1154	0.97526	2.62964	0.44088	3.2122	0.629759	605.33	734.71
14	865.49	1154	0.92287	2.53923	0.4121	3.2122	0.629759	604.04	734.7
14	865.49	1154	0.92911	2.58031	0.41313	3.2122	0.629759	604.38	734.64
14	865.49	1154	0.92612	2.56627	0.40272	3.2122	0.629759	604.16	734.89
14	865.49	1154	0.97279	2.62801	0.43925	3.2122	0.629759	605.34	734.73
14	865.49	1154	0.920595	2.535	0.41326	3.2122	0.629759	604.05	734.83
14	865.49	1154	0.93834	2.62113	0.40859	3.2122	0.629759	604.89	734.37
14	865.49	1154	0.932685	2.60676	0.39464	3.2122	0.629759	603.12	735.64
14	865.49	1154	0.92105	2.53188	0.41449	3.2122	0.629759	604.02	734.94
14	865.49	1154	0.92261	2.54059	0.41322	3.2122	0.629759	604.01	734.75
14	865.49	1154	0.928135	2.60722	0.39389	3.2122	0.629759	603.21	735.03
14	865.49	1154	0.92495	2.55632	0.40681	3.2122	0.629759	604.29	734.66
14	865.49	1154	0.94159	2.62288	0.40598	3.2122	0.629759	604.63	734.1
14	865.49	1154	0.920075	2.53636	0.40844	3.2122	0.629759	604.24	734.86
14	865.49	1154	0.936065	2.59942	0.40306	3.2122	0.629759	604.75	734.47
14	865.49	1154	0.920465	2.53565	0.41252	3.2122	0.629759	603.59	734.95
14	865.49	1154	0.93873	2.60995	0.40598	3.2122	0.629759	604.58	734.42
14	865.49	1154	0.971945	2.63406	0.43935	3.2122	0.629759	605.63	734.63
14	865.49	1154	0.96837	2.69386	0.3939	3.2122	0.629759	605.03	734.64
14	865.49	1154	0.92911	2.62249	0.39544	3.2122	0.629759	603.96	733.45
14	865.49	1154	0.92742	2.56107	0.40331	3.2122	0.629759	604.08	734.79
14	865.49	1154	0.933595	2.60527	0.40634	3.2122	0.629759	604.78	734.28
14	865.49	1154	0.93106	2.60117	0.40629	3.2122	0.629759	604.43	734.46
14	865.49	1154	0.9256	2.58583	0.40887	3.2122	0.629759	604.58	734.47
14	865.49	1154	0.925145	2.54079	0.41443	3.2122	0.629759	603.93	734.63
14	865.49	1154	0.975715	2.63159	0.44273	3.2122	0.629759	604.99	734.45
14	865.49	1154	0.971295	2.63029	0.44305	3.2122	0.629759	605.51	734.13
14	865.49	1154	0.96434	2.69224	0.39528	3.2122	0.629759	605.02	734.77
14	865.49	1154	0.97357	2.62964	0.44607	3.2122	0.629759	605.18	734.43
14	865.49	1154	0.92079	2.53416	0.41171	3.2122	0.629759	603.77	734.78
14	865.49	1154	0.973375	2.62834	0.44797	3.2122	0.629759	605.21	734.46
14	865.49	1154	0.93639	2.60202	0.41405	3.2122	0.629759	604.45	734.36
14	865.49	1154	0.94016	2.61983	0.41312	3.2122	0.629759	604.86	734.44
14	865.49	1154	0.9386	2.61072	0.41219	3.2122	0.629759	604.6	734.38
14	865.49	1154	0.97552	2.63302	0.44221	3.2122	0.629759	605.25	734.82
14	865.49	1154	0.960635	2.69536	0.39848	3.2122	0.629759	605.13	734.58
14	865.49	1154	0.96369	2.69068	0.39538	3.2122	0.629759	605.02	734.56
14	865.49	1154	0.92976	2.58537	0.4016	3.2122	0.629759	604.34	734.59
14	865.49	1154	0.974285	2.63146	0.43351	3.2122	0.629759	605.31	734.42
14	865.49	1154	0.97422	2.63152	0.43633	3.2122	0.629759	605.41	734.78
14	865.49	1154	0.919815	2.53649	0.41374	3.2122	0.629759	603.69	734.81
14	865.49	1154	0.93522	2.60065	0.41184	3.2122	0.629759	604.78	734.46
14	865.49	1154	0.97435	2.63374	0.44483	3.2122	0.629759	605.47	734.72
14	865.49	1154	0.975585	2.63282	0.44198	3.2122	0.629759	605.24	734.74
14	865.49	1154	0.920205	2.53506	0.41485	3.2122	0.629759	604.1	734.65
14	865.49	1154	0.93496	2.62548	0.38524	3.2122	0.629759	604.55	734.57
14	865.49	1154	0.974935	2.62834	0.43686	3.2122	0.629759	603.65	735.35
14	865.49	1154	0.922415	2.52922	0.41715	3.2122	0.629759	603.96	734.74
14	865.49	1154	0.923325	2.53565	0.41561	3.2122	0.629759	603.57	734.79
14	865.49	1154	0.974805	2.63139	0.44465	3.2122	0.629759	605.22	734.71
14	865.49	1154	0.945165	2.6271	0.40844	3.2122	0.629759	604.86	734.04
14	865.49	1154	0.919945	2.53545	0.41033	3.2122	0.629759	604.14	734.8
14	865.49	1154	0.92287	2.53636	0.42074	3.2122	0.629759	603.86	734.79
14	865.49	1154	0.96512	2.69562	0.38683	3.2122	0.629759	605.2	734.53
14	865.49	1154	0.9737	2.63062	0.44059	3.2122	0.629759	605.26	734.51
14	865.49	1154	0.92417	2.56939	0.40617	3.2122	0.629759	604.23	734.83
14	865.49	1154	0.928785	2.57757	0.40931	3.2122	0.629759	604.26	734.66
14	865.49	1154	0.92196	2.54761	0.4097	3.2122	0.629759	604.03	734.61
14	865.49	1154	0.92066	2.54488	0.40714	3.2122	0.629759	604	734.76
14	865.49	1154	0.931515	2.60696	0.411	3.2122	0.629759	604.6	734.38
14	865.49	1154	0.94094	2.61755	0.40394	3.2122	0.629759	604.82	734.11
14	865.49	1154	0.93925	2.61976	0.40593	3.2122	0.629759	604.58	734.37
14	865.49	1154	0.92053	2.5376	0.40822	3.2122	0.629759	604.1	734.74
14	865.49	1154	0.97656	2.62983	0.43455	3.2122	0.629759	605.66	734.94
14	865.49	1154	0.926315	2.57355	0.40592	3.2122	0.629759	604.39	734.93
14	865.49	1154	0.930605	2.57524	0.40656	3.2122	0.629759	604.04	734.71
14	865.49	1154	0.93691	2.62697	0.40425	3.2122	0.629759	603.78	733.96
14	865.49	1154	0.93327	2.60072	0.40855	3.2122	0.629759	604.49	734.47
14	865.49	1154	0.938015	2.61573	0.40592	3.2122	0.629759	604.79	734.17
14	865.49	1154	0.93717	2.61573	0.41054	3.2122	0.629759	605.16	734.12
14	865.49	1154	0.91858	2.53767	0.41211	3.2122	0.629759	604.12	734.66
14	865.49	1154	0.95303	2.68099	0.38073	3.2122	0.629759	604.75	734.46
14	865.49	1154	0.92677	2.5662	0.40764	3.2122	0.629759	604.2	734.83
14	865.49	1154	0.922935	2.55957	0.40628	3.2122	0.629759	604.1	734.76
14	865.49	1154	0.924625	2.57569	0.40554	3.2122	0.629759	604.1	734.77
14	865.49	1154	0.933595	2.59668	0.4077	3.2122	0.629759	604.46	734.57
14	865.49	1154	0.946465	2.62522	0.40877	3.2122	0.629759	605.05	734.16
14	865.49	1154	0.93795	2.61775	0.40594	3.2122	0.629759	604.67	734.27
14	865.49	1154	0.973115	2.6288	0.43961	3.2122	0.629759	605.41	734.74
14	865.49	1154	0.92235	2.53728	0.41549	3.2122	0.629759	603.78	734.65
14	865.49	1154	0.924755	2.56633	0.40311	3.2122	0.629759	604.48	734.8
14	865.49	1154	0.92482	2.57439	0.41057	3.2122	0.629759	604.32	734.74
14	865.49	1154	0.924755	2.5534	0.41439	3.2122	0.629759	604.16	734.57
14	865.49	1154	0.939705	2.62515	0.40627	3.2122	0.629759	604.6	734.29
14	865.49	1154	0.921505	2.53871	0.4199	3.2122	0.629759	604.06	734.53
14	865.49	1154	0.920205	2.53773	0.41056	3.2122	0.629759	604.29	734.77
14	865.49	1154	0.939055	2.61228	0.40879	3.2122	0.629759	604.63	734.14
14	865.49	1154	0.938405	2.61788	0.40548	3.2122	0.629759	604.77	734.39
14	865.49	1154	0.92365	2.55821	0.40711	3.2122	0.629759	604.12	734.72
14	865.49	1154	0.97409	2.63075	0.44248	3.2122	0.629759	605.71	734.73
14	865.49	1154	0.92742	2.5792	0.40714	3.2122	0.629759	604.45	734.66
14	865.49	1154	0.924365	2.57816	0.41145	3.2122	0.629759	604.07	734.55
14	865.49	1154	0.918255	2.54046	0.4149	3.2122	0.629759	603.48	734.92
14	865.49	1154	0.93301	2.60579	0.40747	3.2122	0.629759	605.1	734.29
14	865.49	1154	0.91845	2.53539	0.41615	3.2122	0.629759	604.15	734.74
14	865.49	1154	0.93665	2.61658	0.40458	3.2122	0.629759	604.58	734.24
14	865.49	1154	0.93028	2.59266	0.38377	3.2122	0.629759	603.32	733.75
14	865.49	1154	0.923585	2.56522	0.40809	3.2122	0.629759	604.09	734.79
14	865.49	1154	0.92391	2.57517	0.40964	3.2122	0.629759	604.35	734.82
14	865.49	1154	0.92716	2.57413	0.40259	3.2122	0.629759	604.47	734.62
14	865.49	1154	0.93002	2.59064	0.40948	3.2122	0.629759	604.88	734.34
14	865.49	1154	0.92248	2.54696	0.40827	3.2122	0.629759	604.24	734.74
14	865.49	1154	0.935155	2.61164	0.4109	3.2122	0.629759	604.56	734.17
14	865.49	1154	0.93561	2.61963	0.41428	3.2122	0.629759	604.44	734.43
14	865.49	1154	0.92118	2.53155	0.40781	3.2122	0.629759	604.21	734.71
14	865.49	1154	0.924105	2.55443	0.41139	3.2122	0.629759	604.2	734.65
14	865.49	1154	0.925535	2.57796	0.40531	3.2122	0.629759	604.51	734.73
14	865.49	1154	0.928005	2.57328	0.4136	3.2122	0.629759	604.33	734.57
14	865.49	1154	0.944385	2.64661	0.38858	3.2122	0.629759	604.01	733.68
14	865.49	1154	0.97292	2.62957	0.44312	3.2122	0.629759	605.26	734.78
14	865.49	1154	0.93418	2.60812	0.40724	3.2122	0.629759	604.99	734.32
14	865.49	1154	0.93613	2.61254	0.40777	3.2122	0.629759	604.59	734.23
14	865.49	1154	0.937625	2.61456	0.41421	3.2122	0.629759	604.66	734.25
14	865.49	1154	0.920465	2.53376	0.42072	3.2122	0.629759	604.14	734.7
14	865.49	1154	0.92924	2.58271	0.40269	3.2122	0.629759	604.57	734.45
14	865.49	1154	0.923	2.57166	0.40872	3.2122	0.629759	603.96	734.89
14	865.49	1154	0.928265	2.57348	0.41028	3.2122	0.629759	604.23	734.76
14	865.49	1154	0.924105	2.55145	0.41353	3.2122	0.629759	604.16	734.45
14	865.49	1154	0.930865	2.60182	0.41084	3.2122	0.629759	604.71	734.4
14	865.49	1154	0.935675	2.61267	0.40503	3.2122	0.629759	604.84	734.27
14	865.49	1154	0.975585	2.63042	0.44634	3.2122	0.629759	605.59	734.83
14	865.49	1154	0.93717	2.62067	0.40162	3.2122	0.629759	604.56	734.39
14	865.49	1154	0.940745	2.63263	0.3992	3.2122	0.629759	604.59	734.35
14	865.49	1154	0.96707	2.62594	0.44095	3.2122	0.629759	603.46	735.53
14	865.49	1154	0.974675	2.63049	0.43792	3.2122	0.629759	605.54	734.77
14	865.49	1154	0.92781	2.57614	0.40444	3.2122	0.629759	604.27	734.86
14	865.49	1154	0.973245	2.63152	0.43697	3.2122	0.629759	605.35	734.61
14	865.49	1154	0.94471	2.62678	0.40721	3.2122	0.629759	604.91	734.05
14	865.49	1154	0.936195	2.6076	0.40872	3.2122	0.629759	604.69	734.51
14	865.49	1154	0.93561	2.61307	0.40997	3.2122	0.629759	604.91	734.23
14	865.49	1154	0.93561	2.61735	0.41086	3.2122	0.629759	605.28	734.26
14	865.49	1154	0.936585	2.60754	0.40734	3.2122	0.629759	604.54	734.43
14	865.49	1154	0.97838	2.62977	0.44018	3.2122	0.629759	605.72	734.84
14	865.49	1154	0.926705	2.57003	0.40639	3.2122	0.629759	604.35	734.66
14	865.49	1154	0.928915	2.60325	0.39651	3.2122	0.629759	603.72	734.13
14	865.49	1154	0.924235	2.54605	0.40955	3.2122	0.629759	604.11	734.82
14	865.49	1154	0.922545	2.55092	0.40932	3.2122	0.629759	603.91	734.74
14	865.49	1154	0.93392	2.61404	0.40254	3.2122	0.629759	604.8	734.08
14	865.49	1154	0.935805	2.61684	0.40145	3.2122	0.629759	604.72	734.29
14	865.49	1154	0.92131	2.5404	0.41058	3.2122	0.629759	604.25	734.72
14	865.49	1154	0.975975	2.63315	0.43832	3.2122	0.629759	605.76	734.77
14	865.49	1154	0.927355	2.57608	0.41239	3.2122	0.629759	604.52	734.73
14	865.49	1154	0.92547	2.58512	0.41061	3.2122	0.629759	604.15	734.64
14	865.49	1154	0.932295	2.61553	0.40957	3.2122	0.629759	603.95	734.56
14	865.49	1154	0.93314	2.59551	0.41121	3.2122	0.629759	604.57	734.53
14	865.49	1154	0.93652	2.6156	0.41002	3.2122	0.629759	604.77	734.12
14	865.49	1154	0.93821	2.62216	0.40648	3.2122	0.629759	604.81	734.23
14	865.49	1154	0.925145	2.53299	0.41531	3.2122	0.629759	603.79	734.82
14	865.49	1154	0.953225	2.66597	0.35896	3.2122	0.629759	603.6	735.46
14	865.49	1154	0.92365	2.55443	0.41378	3.2122	0.629759	604.32	734.73
14	865.49	1154	0.92651	2.56672	0.40763	3.2122	0.629759	604.15	734.75
14	865.49	1154	0.92573	2.57511	0.40837	3.2122	0.629759	604.16	734.98
14	865.49	1154	0.9321	2.57888	0.41242	3.2122	0.629759	604.47	734.59
14	865.49	1154	0.9412	2.61996	0.41698	3.2122	0.629759	604.62	734.26
14	865.49	1154	0.938925	2.61553	0.40759	3.2122	0.629759	604.72	734.1
14	865.49	1154	0.9399	2.6206	0.40876	3.2122	0.629759	604.87	734.26
14	865.49	1154	0.922415	2.53273	0.41248	3.2122	0.629759	603.82	734.59
14	865.49	1154	0.94666	2.6494	0.40062	3.2122	0.629759	604.66	734.56
14	865.49	1154	0.927355	2.56887	0.40814	3.2122	0.629759	603.95	734.73
14	865.49	1154	0.92586	2.5755	0.4035	3.2122	0.629759	604.4	734.8
14	865.49	1154	0.92222	2.54722	0.40798	3.2122	0.629759	603.92	734.61
14	865.49	1154	0.96798	2.6197	0.43677	3.2122	0.629759	603.89	734.89
14	865.49	1154	0.919815	2.5311	0.41463	3.2122	0.629759	603.98	734.58
14	865.49	1154	0.919685	2.53474	0.41357	3.2122	0.629759	603.92	734.74
14	865.49	1154	0.934895	2.60871	0.40231	3.2122	0.629759	604.95	734
14	865.49	1154	0.939185	2.61521	0.40782	3.2122	0.629759	604.76	734.23
14	865.49	1154	0.923975	2.56022	0.4158	3.2122	0.629759	603.88	734.73
14	865.49	1154	0.975195	2.6349	0.43655	3.2122	0.629759	605.61	734.54
14	865.49	1154	0.926315	2.55567	0.41139	3.2122	0.629759	604.4	734.7
14	865.49	1154	0.92547	2.57601	0.40958	3.2122	0.629759	604.27	734.68
14	865.49	1154	0.922155	2.52772	0.41583	3.2122	0.629759	603.95	734.85
14	865.49	1154	0.92313	2.56204	0.40744	3.2122	0.629759	603.77	734.76
14	865.49	1154	0.934765	2.61684	0.40505	3.2122	0.629759	604.56	734.24
14	865.49	1154	0.937625	2.6169	0.40801	3.2122	0.629759	604.61	734.31
14	865.49	1154	0.922545	2.55463	0.4135	3.2122	0.629759	604.06	734.66
14	865.49	1154	0.97604	2.63016	0.43822	3.2122	0.629759	605.52	734.96
14	865.49	1154	0.968825	2.70094	0.3946	3.2122	0.629759	604.37	734.62
14	865.49	1154	0.92638	2.58069	0.41136	3.2122	0.629759	604.45	734.78
14	865.49	1154	0.92885	2.57875	0.41263	3.2122	0.629759	604.32	734.41
14	865.49	1154	0.92339	2.54664	0.41078	3.2122	0.629759	604.08	734.71
14	865.49	1154	0.9217	2.52889	0.4149	3.2122	0.629759	604.11	734.8
14	865.49	1154	0.92196	2.53071	0.41313	3.2122	0.629759	603.91	734.78
14	865.49	1154	0.925665	2.58225	0.41011	3.2122	0.629759	604.38	734.6
14	865.49	1154	0.922285	2.56685	0.41137	3.2122	0.629759	604.23	734.8
14	865.49	1154	0.964405	2.70289	0.39729	3.2122	0.629759	605.04	734.42
14	865.49	1154	0.922805	2.55229	0.41121	3.2122	0.629759	604.19	734.49
14	865.49	1154	0.93002	2.57965	0.41044	3.2122	0.629759	604.25	734.7
14	865.49	1154	0.973375	2.63276	0.4417	3.2122	0.629759	605.37	734.67
14	865.49	1154	0.918905	2.52662	0.41514	3.2122	0.629759	604.08	734.72
14	865.49	1154	0.92183	2.53409	0.41525	3.2122	0.629759	603.92	734.8
14	865.49	1154	0.93171	2.59584	0.41608	3.2122	0.629759	604.39	734.41
14	865.49	1154	0.927485	2.58102	0.40985	3.2122	0.629759	604.12	734.67
14	865.49	1154	0.9282	2.58557	0.41147	3.2122	0.629759	604.11	734.53
14	865.49	1154	0.97123	2.71557	0.38523	3.2122	0.629759	604.87	734.34
14	865.49	1154	0.948415	2.6119	0.34952	3.2122	0.629759	603.93	733.66
14	865.49	1154	0.92326	2.5532	0.40941	3.2122	0.629759	604.05	734.52
14	865.49	1154	0.933855	2.59935	0.41177	3.2122	0.629759	604.54	734.4
14	865.49	1154	0.921635	2.5298	0.41454	3.2122	0.629759	603.66	734.64
14	865.49	1154	0.919555	2.53734	0.42069	3.2122	0.629759	604.19	734.63
14	865.49	1154	0.934895	2.61794	0.3959	3.2122	0.629759	604.86	734.12
14	865.49	1154	0.96122	2.70634	0.38378	3.2122	0.629759	605.35	734.24
14	865.49	1154	0.92105	2.53455	0.40855	3.2122	0.629759	603.62	734.81
14	865.49	1154	0.974545	2.62853	0.43665	3.2122	0.629759	605.56	734.67
14	865.49	1154	0.969345	2.70731	0.39124	3.2122	0.629759	604.96	734.44
14	865.49	1154	0.97266	2.62899	0.43213	3.2122	0.629759	605.29	734.63
14	865.49	1154	0.942175	2.62633	0.40787	3.2122	0.629759	604.84	734.1
14	865.49	1154	0.93223	2.60624	0.4129	3.2122	0.629759	604.71	734.46
14	865.49	1154	0.92534	2.57809	0.40459	3.2122	0.629759	603.94	734.88
14	865.49	1154	0.966095	2.70803	0.395	3.2122	0.629759	605.16	734.35
14	865.49	1154	0.92105	2.54293	0.41247	3.2122	0.629759	604.22	734.67
14	865.49	1154	0.94978	2.6455	0.40268	3.2122	0.629759	604.61	734.18
14	865.49	1154	0.92404	2.5415	0.40998	3.2122	0.629759	604.08	734.87
14	865.49	1154	0.9438	2.63971	0.40295	3.2122	0.629759	603.85	734.51
14	865.49	1154	0.924495	2.53968	0.40681	3.2122	0.629759	603.99	734.74
14	865.49	1154	0.963885	2.71063	0.39505	3.2122	0.629759	605.34	734.34
14	865.49	1154	0.93431	2.61241	0.41306	3.2122	0.629759	604.89	734.24
14	865.49	1154	0.93054	2.59448	0.41301	3.2122	0.629759	604.42	734.43
14	865.49	1154	0.92677	2.58505	0.40998	3.2122	0.629759	604.28	734.55
14	865.49	1154	0.97669	2.62827	0.43549	3.2122	0.629759	605.57	734.77
14	865.49	1154	0.96733	2.70049	0.40387	3.2122	0.629759	605.01	734.59
14	865.49	1154	0.92417	2.55378	0.41284	3.2122	0.629759	604.32	734.49
14	865.49	1154	0.933725	2.62613	0.4081	3.2122	0.629759	604.13	734.36
14	865.49	1154	0.9308	2.58499	0.41132	3.2122	0.629759	604.51	734.5
14	865.49	1154	0.92105	2.52967	0.41451	3.2122	0.629759	603.84	734.66
14	865.49	1154	0.92053	2.53194	0.41278	3.2122	0.629759	603.94	734.67
14	865.49	1154	0.972595	2.63477	0.44108	3.2122	0.629759	605.59	734.8
14	865.49	1154	0.92482	2.5378	0.40711	3.2122	0.629759	603.77	734.68
14	865.49	1154	0.925925	2.58251	0.40239	3.2122	0.629759	604.52	734.59
14	865.49	1154	0.963885	2.71076	0.39543	3.2122	0.629759	605.41	734.25
14	865.49	1154	0.92404	2.57881	0.40793	3.2122	0.629759	604.33	734.71
14	865.49	1154	0.92625	2.58726	0.40794	3.2122	0.629759	604.22	734.65
14	865.49	1154	0.939445	2.62737	0.40623	3.2122	0.629759	604.8	734.1
14	865.49	1154	0.920725	2.53331	0.41994	3.2122	0.629759	603.79	734.75
14	865.49	1154	0.92079	2.53038	0.41581	3.2122	0.629759	603.83	734.65
14	865.49	1154	0.92729	2.5846	0.40643	3.2122	0.629759	604.29	734.63
14	865.49	1154	0.94523	2.64394	0.3984	3.2122	0.629759	604.66	734.27
14	865.49	1154	0.976495	2.72389	0.39416	3.2122	0.629759	604.69	734.32
14	865.49	1154	0.946465	2.64251	0.39813	3.2122	0.629759	604.71	734.28
14	865.49	1154	0.948155	2.6884	0.39654	3.2122	0.629759	605.17	734.34
14	865.49	1154	0.9919	2.73494	0.42764	3.2122	0.629759	604.02	734.37
14	865.49	1154	0.919295	2.53389	0.41393	3.2122	0.629759	604.16	734.77
14	865.49	1154	0.952575	2.63855	0.40586	3.2122	0.629759	604.17	734.24
14	865.49	1154	0.97266	2.63165	0.43431	3.2122	0.629759	605.03	734.68
14	865.49	1154	0.94133	2.63003	0.40718	3.2122	0.629759	604.93	734.06
14	865.49	1154	0.920595	2.55287	0.41513	3.2122	0.629759	604.17	734.69
14	865.49	1154	0.94666	2.64784	0.40177	3.2122	0.629759	604.87	734.29
14	865.49	1154	0.92378	2.55586	0.41678	3.2122	0.629759	604.16	734.66
14	865.49	1154	0.92014	2.54813	0.41056	3.2122	0.629759	603.9	734.71
14	865.49	1154	0.92079	2.52596	0.41508	3.2122	0.629759	603.83	734.82
14	865.49	1154	0.920335	2.55613	0.41468	3.2122	0.629759	604.11	734.63
14	865.49	1154	0.94575	2.63653	0.39654	3.2122	0.629759	604.21	734.44
14	865.49	1154	0.921895	2.54943	0.41185	3.2122	0.629759	604.17	734.61
14	865.49	1154	0.9243	2.54585	0.41214	3.2122	0.629759	603.81	734.65
14	865.49	1154	0.9464	2.64238	0.40696	3.2122	0.629759	605.01	734.07
14	865.49	1154	0.92911	2.58213	0.41493	3.2122	0.629759	604.54	734.39
14	865.49	1154	0.92573	2.5753	0.40944	3.2122	0.629759	604.48	734.5
14	865.49	1154	0.92209	2.55274	0.40798	3.2122	0.629759	604.35	734.74
14	865.49	1154	0.947895	2.65148	0.40567	3.2122	0.629759	605.13	734.06
14	865.49	1154	0.9191	2.52882	0.41389	3.2122	0.629759	604.1	734.76
14	865.49	1154	0.92001	2.52999	0.41982	3.2122	0.629759	603.75	734.66
14	865.49	1154	0.92742	2.58037	0.40822	3.2122	0.629759	604.25	734.6
14	865.49	1154	0.921895	2.55483	0.41019	3.2122	0.629759	604.11	734.7
14	865.49	1154	0.965185	2.71018	0.39941	3.2122	0.629759	604.99	734.58
14	865.49	1154	0.92105	2.55268	0.41237	3.2122	0.629759	603.99	734.56
14	865.49	1154	0.96057	2.67313	0.39694	3.2122	0.629759	605.13	734.41
14	865.49	1154	0.94588	2.64336	0.4023	3.2122	0.629759	604.97	734.12
14	865.49	1154	0.91988	2.53572	0.41297	3.2122	0.629759	604.15	734.82
14	865.49	1154	0.92222	2.53117	0.41678	3.2122	0.629759	603.87	734.62
14	865.49	1154	0.972075	2.63042	0.44182	3.2122	0.629759	604.98	734.63
14	865.49	1154	0.942825	2.62385	0.39842	3.2122	0.629759	604.84	734.02
14	865.49	1154	0.919555	2.54352	0.41091	3.2122	0.629759	603.98	734.74
14	865.49	1154	0.97162	2.7159	0.39927	3.2122	0.629759	605.02	734.51
14	865.49	1154	0.94757	2.64407	0.37306	3.2122	0.629759	604.3	734.68
14	865.49	1154	0.923325	2.54885	0.41191	3.2122	0.629759	603.83	734.76
14	865.49	1154	0.932165	2.60006	0.4065	3.2122	0.629759	604.72	734.32
14	865.49	1154	0.91858	2.52837	0.4233	3.2122	0.629759	603.61	734.76
14	865.49	1154	0.918645	2.53305	0.41667	3.2122	0.629759	603.81	734.65
14	865.49	1154	0.920335	2.53493	0.41116	3.2122	0.629759	604.14	734.77
14	865.49	1154	0.92183	2.54273	0.4135	3.2122	0.629759	604.31	734.79
14	865.49	1154	0.953615	2.63328	0.4007	3.2122	0.629759	603.8	733.66
14	865.49	1154	0.975975	2.6325	0.44064	3.2122	0.629759	605.72	734.12
14	865.49	1154	0.94211	2.62509	0.40672	3.2122	0.629759	605.26	733.91
14	865.49	1154	0.919685	2.55528	0.41825	3.2122	0.629759	604.2	734.62
14	865.49	1154	0.948805	2.64751	0.40609	3.2122	0.629759	604.85	734.06
14	865.49	1154	0.93366	2.605	0.4013	3.2122	0.629759	604.61	734.54
14	865.49	1154	0.928785	2.58102	0.40837	3.2122	0.629759	604.27	734.77
14	865.49	1154	0.96993	2.7081	0.39171	3.2122	0.629759	605	734.52
14	865.49	1154	0.920855	2.53923	0.41115	3.2122	0.629759	604.14	734.72
14	865.49	1154	0.9464	2.64823	0.4064	3.2122	0.629759	604.87	734.08
14	865.49	1154	0.918515	2.53974	0.41045	3.2122	0.629759	604.07	734.85
14	865.49	1154	0.92898	2.59935	0.41043	3.2122	0.629759	604.35	734.44
14	865.49	1154	0.940745	2.61267	0.39964	3.2122	0.629759	604.95	734.04
14	865.49	1154	0.93262	2.59474	0.40571	3.2122	0.629759	604.49	734.45
14	865.49	1154	0.937365	2.6132	0.40792	3.2122	0.629759	604.84	734.1
14	865.49	1154	0.92222	2.5519	0.41444	3.2122	0.629759	604.31	734.72
14	865.49	1154	0.93327	2.59798	0.40921	3.2122	0.629759	604.69	734.6
14	865.49	1154	0.93821	2.62327	0.41062	3.2122	0.629759	604.77	734.22
14	865.49	1154	0.92118	2.55346	0.41097	3.2122	0.629759	604.26	734.4
14	865.49	1154	0.9763	2.62983	0.44058	3.2122	0.629759	605.53	734.7
14	865.49	1154	0.93821	2.59792	0.3703	3.2122	0.629759	603.62	733.41
14	865.49	1154	0.93379	2.5985	0.41417	3.2122	0.629759	603.96	734.54
14	865.49	1154	0.942435	2.62834	0.40442	3.2122	0.629759	604.8	734.07
14	865.49	1154	0.923	2.55099	0.42162	3.2122	0.629759	604.4	734.47
14	865.49	1154	0.97279	2.62853	0.43817	3.2122	0.629759	605.49	734.7
14	865.49	1154	0.92391	2.55248	0.41201	3.2122	0.629759	604.12	734.63
14	865.49	1154	0.92209	2.54982	0.41515	3.2122	0.629759	603.98	734.65
14	865.49	1154	0.938275	2.61508	0.39409	3.2122	0.629759	603.85	734.04
14	865.49	1154	0.921765	2.55248	0.41627	3.2122	0.629759	603.92	734.77
14	865.49	1154	0.946985	2.64531	0.40482	3.2122	0.629759	604.82	734.11
14	865.49	1154	0.92274	2.5584	0.41343	3.2122	0.629759	603.95	734.53
14	865.49	1154	0.91975	2.53442	0.41223	3.2122	0.629759	604.07	734.86
14	865.49	1154	0.94731	2.64797	0.40263	3.2122	0.629759	604.59	734.24
14	865.49	1154	0.931905	2.58726	0.41176	3.2122	0.629759	604.24	734.5
14	865.49	1154	0.94549	2.64225	0.40129	3.2122	0.629759	605.3	734.14
14	865.49	1154	0.922285	2.55782	0.41242	3.2122	0.629759	604.17	734.61
14	865.49	1154	0.918515	2.53903	0.40936	3.2122	0.629759	604.15	734.66
14	865.49	1154	0.950625	2.67651	0.39682	3.2122	0.629759	605.2	734.4
14	865.49	1154	0.929175	2.58758	0.40634	3.2122	0.629759	604.49	734.33
14	865.49	1154	0.972465	2.63062	0.44003	3.2122	0.629759	605.35	733.91
14	865.49	1154	0.919945	2.53649	0.41655	3.2122	0.629759	603.97	734.8
14	865.49	1154	0.977015	2.62951	0.45081	3.2122	0.629759	605.16	734.37
14	865.49	1154	0.946595	2.64329	0.40057	3.2122	0.629759	604.76	734.37
14	865.49	1154	0.92469	2.54325	0.41041	3.2122	0.629759	604.07	734.76
14	865.49	1154	0.926315	2.57842	0.41174	3.2122	0.629759	604.32	734.73
14	865.49	1154	0.92248	2.53071	0.40934	3.2122	0.629759	604.15	734.9
14	865.49	1154	0.922285	2.54371	0.40836	3.2122	0.629759	604.02	734.81
14	865.49	1154	0.919685	2.52629	0.41268	3.2122	0.629759	604.08	734.76
14	865.49	1154	0.948675	2.65031	0.39344	3.2122	0.629759	604.63	734.15
14	865.49	1154	0.94471	2.62801	0.40241	3.2122	0.629759	603.83	733.89
14	865.49	1154	0.92274	2.54962	0.41705	3.2122	0.629759	604.01	734.63
14	865.49	1154	0.935805	2.6132	0.3464	3.2122	0.629759	606.16	733.24
14	865.49	1154	0.92079	2.53012	0.41708	3.2122	0.629759	603.93	734.88
14	865.49	1154	0.918125	2.52798	0.4375	3.2122	0.629759	603.63	735.08
14	865.49	1154	0.932295	2.59525	0.41348	3.2122	0.629759	604.19	734.61
14	865.49	1154	0.97552	2.63185	0.45174	3.2122	0.629759	605.64	734.88
14	865.49	1154	0.922285	2.5521	0.42117	3.2122	0.629759	604.04	734.66
14	865.49	1154	0.975	2.63133	0.43561	3.2122	0.629759	605.42	734.78
14	865.49	1154	0.94471	2.63308	0.40565	3.2122	0.629759	604.13	734.6
14	865.49	1154	0.938145	2.62658	0.40263	3.2122	0.629759	604.71	734.24
14	865.49	1154	0.9243	2.56028	0.41568	3.2122	0.629759	604.15	734.65
14	865.49	1154	0.920985	2.54767	0.41232	3.2122	0.629759	603.92	734.61
14	865.49	1154	0.97357	2.63094	0.44683	3.2122	0.629759	605.41	734.87
14	865.49	1154	0.92079	2.53526	0.40831	3.2122	0.629759	603.62	734.94
14	865.49	1154	0.92456	2.55073	0.41338	3.2122	0.629759	604.16	734.66
14	865.49	1154	0.95082	2.64407	0.4019	3.2122	0.629759	603.8	733.9
14	865.49	1154	0.92274	2.5506	0.41394	3.2122	0.629759	604.25	734.6
14	865.49	1154	0.918775	2.5404	0.40998	3.2122	0.629759	604.39	734.79
14	865.49	1154	0.94198	2.62405	0.40268	3.2122	0.629759	604.63	734.1
14	865.49	1154	0.921115	2.53974	0.41518	3.2122	0.629759	604.14	734.68
14	865.49	1154	0.956215	2.67897	0.3932	3.2122	0.629759	605.24	734.64
14	865.49	1154	0.95069	2.678	0.39252	3.2122	0.629759	605.14	734.64
14	865.49	1154	0.919815	2.54027	0.41108	3.2122	0.629759	603.88	734.91
14	865.49	1154	0.92339	2.56094	0.41668	3.2122	0.629759	603.96	734.68
14	865.49	1154	0.92066	2.54936	0.4099	3.2122	0.629759	603.66	734.51
14	865.49	1154	0.93171	2.61742	0.40519	3.2122	0.629759	604.19	733.92
14	865.49	1154	0.920465	2.55028	0.41222	3.2122	0.629759	603.9	734.75
14	865.49	1154	0.97591	2.63081	0.44221	3.2122	0.629759	605.2	734.51
14	865.49	1154	0.97409	2.62873	0.44531	3.2122	0.629759	605.17	734.67
14	865.49	1154	0.919945	2.53117	0.41481	3.2122	0.629759	604.13	734.92
14	865.49	1154	0.91988	2.5261	0.41716	3.2122	0.629759	603.97	734.83
14	865.49	1154	0.92261	2.55314	0.41383	3.2122	0.629759	603.95	734.63
14	865.49	1154	0.92781	2.58024	0.41025	3.2122	0.629759	604.23	734.72
14	865.49	1154	0.94198	2.62574	0.40231	3.2122	0.629759	604.68	734.14
14	865.49	1154	0.92053	2.54611	0.41657	3.2122	0.629759	604.01	734.65
14	865.49	1154	0.92274	2.54631	0.41423	3.2122	0.629759	604.07	734.52
14	865.49	1154	0.92183	2.54741	0.40829	3.2122	0.629759	604.23	734.83
14	865.49	1154	0.929045	2.59038	0.40861	3.2122	0.629759	604.57	734.55
14	865.49	1154	0.923065	2.53383	0.41654	3.2122	0.629759	604.21	734.81
14	865.49	1154	0.93236	2.5907	0.41679	3.2122	0.629759	604.25	734.47
14	865.49	1154	0.95316	2.64088	0.39942	3.2122	0.629759	603.68	733.62
14	865.49	1154	0.92014	2.52902	0.41233	3.2122	0.629759	603.78	734.98
14	865.49	1154	0.918775	2.53324	0.41572	3.2122	0.629759	603.94	734.89
14	865.49	1154	0.922805	2.54338	0.41143	3.2122	0.629759	604.15	734.69
14	865.49	1154	0.931385	2.62379	0.39079	3.2122	0.629759	604.83	734.28
14	865.49	1154	0.973895	2.6312	0.43932	3.2122	0.629759	605.2	734.48
14	865.49	1154	0.952315	2.6704	0.3934	3.2122	0.629759	604.88	734.53
14	865.49	1154	0.91962	2.53487	0.40571	3.2122	0.629759	604.12	734.91
14	865.49	1154	0.94913	2.64219	0.39958	3.2122	0.629759	604.3	734.3
14	865.49	1154	0.974025	2.62996	0.44058	3.2122	0.629759	605.42	734.51
14	865.49	1154	0.95069	2.63894	0.39916	3.2122	0.629759	604.07	734.1
14	865.49	1154	0.930215	2.5818	0.41679	3.2122	0.629759	604.23	734.39
14	865.49	1154	0.91793	2.53064	0.41645	3.2122	0.629759	603.58	734.93
14	865.49	1154	0.92014	2.5467	0.41065	3.2122	0.629759	604.15	734.69
14	865.49	1154	0.93262	2.58362	0.40901	3.2122	0.629759	604.57	734.52
15	323.9	182.4	0.87113	2.61729	0.40751	3.467	1.05537	612	1201.1
15	323.9	182.4	0.90142	2.58323	0.48241	3.467	1.05537	613.96	1200.8
15	323.9	182.4	0.876395	2.58693	0.39761	3.467	1.05537	611.31	1201.2
15	323.9	182.4	0.894855	2.76998	0.39686	3.467	1.05537	614.26	1201
15	323.9	182.4	0.9048	2.59266	0.48099	3.467	1.05537	613.71	1200.5
15	323.9	182.4	0.879385	2.56893	0.39794	3.467	1.05537	611.46	1201.3
15	323.9	182.4	0.878475	2.56256	0.40271	3.467	1.05537	611.37	1201.5
15	323.9	182.4	0.89921	2.58791	0.48002	3.467	1.05537	613.65	1200.8
15	323.9	182.4	0.874575	2.57101	0.401	3.467	1.05537	611.37	1201.2
15	323.9	182.4	0.88192	2.53442	0.40848	3.467	1.05537	611.05	1201.3
15	323.9	182.4	0.87763	2.38713	0.39345	3.467	1.05537	613.24	1201.5
15	323.9	182.4	0.878085	2.58193	0.40454	3.467	1.05537	611.2	1201.3
15	323.9	182.4	0.87893	2.56009	0.40848	3.467	1.05537	611.26	1201.4
15	323.9	182.4	0.901355	2.77563	0.40473	3.467	1.05537	613.41	1201.1
15	323.9	182.4	0.89973	2.58213	0.44555	3.467	1.05537	613.52	1201.1
15	323.9	182.4	0.873015	2.61748	0.4133	3.467	1.05537	613.02	1201
15	323.9	182.4	0.90142	2.58563	0.48491	3.467	1.05537	613.71	1200.8
15	323.9	182.4	0.875745	2.59038	0.40391	3.467	1.05537	611.63	1201.2
15	323.9	182.4	0.87191	2.60826	0.41498	3.467	1.05537	612.4	1201
15	323.9	182.4	0.902655	2.58576	0.48527	3.467	1.05537	613.73	1200.9
15	323.9	182.4	0.90142	2.78317	0.41096	3.467	1.05537	613.64	1201.1
15	323.9	182.4	0.87321	2.61059	0.40914	3.467	1.05537	612.96	1200.7
15	323.9	182.4	0.90051	2.58726	0.48094	3.467	1.05537	613.97	1200.8
15	323.9	182.4	0.87659	2.58187	0.40619	3.467	1.05537	611.69	1201.4
[truncated: 27,285 more rows]

## Sheet: Fig2C
Strain	Guide	Replicate	Time (h)	OD_600	Scaled OD_600
AV93 (ΔmscLS)	sgRNA GØ-RØ	A	2.02136	0.0082	0.00314076
AV93 (ΔmscLS)	sgRNA GØ-RØ	A	2.0595	0.0087	0.00333227
AV93 (ΔmscLS)	sgRNA GØ-RØ	A	2.09764	0.0079	0.00302585
AV93 (ΔmscLS)	sgRNA GØ-RØ	A	2.13578	0.0088	0.00337057
AV93 (ΔmscLS)	sgRNA GØ-RØ	A	2.17391	0.0092	0.00352378
AV93 (ΔmscLS)	sgRNA GØ-RØ	A	2.21205	0.0094	0.00360038
AV93 (ΔmscLS)	sgRNA GØ-RØ	A	2.25019	0.0096	0.00367699
AV93 (ΔmscLS)	sgRNA GØ-RØ	A	2.28833	0.0099	0.00379189
AV93 (ΔmscLS)	sgRNA GØ-RØ	A	2.3646	0.01	0.00383019
AV93 (ΔmscLS)	sgRNA GØ-RØ	A	2.40274	0.0099	0.00379189
AV93 (ΔmscLS)	sgRNA GØ-RØ	A	2.44087	0.0104	0.0039834
AV93 (ΔmscLS)	sgRNA GØ-RØ	A	2.47901	0.0107	0.00409831
AV93 (ΔmscLS)	sgRNA GØ-RØ	A	2.51715	0.0099	0.00379189
AV93 (ΔmscLS)	sgRNA GØ-RØ	A	2.55528	0.0114	0.00436642
AV93 (ΔmscLS)	sgRNA GØ-RØ	A	2.63155	0.0117	0.00448133
AV93 (ΔmscLS)	sgRNA GØ-RØ	A	2.66969	0.0112	0.00428982
AV93 (ΔmscLS)	sgRNA GØ-RØ	A	2.70783	0.0111	0.00425152
AV93 (ΔmscLS)	sgRNA GØ-RØ	A	2.74596	0.0123	0.00471114
AV93 (ΔmscLS)	sgRNA GØ-RØ	A	2.7841	0.0128	0.00490265
AV93 (ΔmscLS)	sgRNA GØ-RØ	A	2.82224	0.0129	0.00494095
AV93 (ΔmscLS)	sgRNA GØ-RØ	A	2.86037	0.0132	0.00505586
AV93 (ΔmscLS)	sgRNA GØ-RØ	A	2.89851	0.0134	0.00513246
AV93 (ΔmscLS)	sgRNA GØ-RØ	A	2.93664	0.0137	0.00524737
AV93 (ΔmscLS)	sgRNA GØ-RØ	A	2.97478	0.0139	0.00532397
AV93 (ΔmscLS)	sgRNA GØ-RØ	A	3.01291	0.0142	0.00543888
AV93 (ΔmscLS)	sgRNA GØ-RØ	A	3.05105	0.0146	0.00559208
AV93 (ΔmscLS)	sgRNA GØ-RØ	A	3.08919	0.0144	0.00551548
AV93 (ΔmscLS)	sgRNA GØ-RØ	A	3.12732	0.0137	0.00524737
AV93 (ΔmscLS)	sgRNA GØ-RØ	A	3.16546	0.0146	0.00559208
AV93 (ΔmscLS)	sgRNA GØ-RØ	A	3.2036	0.0154	0.0058985
AV93 (ΔmscLS)	sgRNA GØ-RØ	A	3.24174	0.0153	0.0058602
AV93 (ΔmscLS)	sgRNA GØ-RØ	A	3.27987	0.0161	0.00616661
AV93 (ΔmscLS)	sgRNA GØ-RØ	A	3.31801	0.0162	0.00620492
AV93 (ΔmscLS)	sgRNA GØ-RØ	A	3.35615	0.0157	0.00601341
AV93 (ΔmscLS)	sgRNA GØ-RØ	A	3.39429	0.0165	0.00631982
AV93 (ΔmscLS)	sgRNA GØ-RØ	A	3.43242	0.0169	0.00647303
AV93 (ΔmscLS)	sgRNA GØ-RØ	A	3.47056	0.0174	0.00666454
AV93 (ΔmscLS)	sgRNA GØ-RØ	A	3.5087	0.018	0.00689435
AV93 (ΔmscLS)	sgRNA GØ-RØ	A	3.54683	0.0181	0.00693265
AV93 (ΔmscLS)	sgRNA GØ-RØ	A	3.58497	0.0181	0.00693265
AV93 (ΔmscLS)	sgRNA GØ-RØ	A	3.62311	0.0188	0.00720077
AV93 (ΔmscLS)	sgRNA GØ-RØ	A	3.66125	0.0194	0.00743058
AV93 (ΔmscLS)	sgRNA GØ-RØ	A	3.69939	0.0198	0.00758379
AV93 (ΔmscLS)	sgRNA GØ-RØ	A	3.73753	0.0197	0.00754548
AV93 (ΔmscLS)	sgRNA GØ-RØ	A	3.77566	0.02	0.00766039
AV93 (ΔmscLS)	sgRNA GØ-RØ	A	3.8138	0.0203	0.0077753
AV93 (ΔmscLS)	sgRNA GØ-RØ	A	3.85193	0.0213	0.00815831
AV93 (ΔmscLS)	sgRNA GØ-RØ	A	3.89007	0.021	0.00804341
AV93 (ΔmscLS)	sgRNA GØ-RØ	A	3.92821	0.0219	0.00838813
AV93 (ΔmscLS)	sgRNA GØ-RØ	A	3.96635	0.022	0.00842643
AV93 (ΔmscLS)	sgRNA GØ-RØ	A	4.00448	0.023	0.00880945
AV93 (ΔmscLS)	sgRNA GØ-RØ	A	4.04262	0.0229	0.00877115
AV93 (ΔmscLS)	sgRNA GØ-RØ	A	4.08076	0.0241	0.00923077
AV93 (ΔmscLS)	sgRNA GØ-RØ	A	4.1189	0.0244	0.00934568
AV93 (ΔmscLS)	sgRNA GØ-RØ	A	4.15703	0.0247	0.00946058
AV93 (ΔmscLS)	sgRNA GØ-RØ	A	4.19517	0.0253	0.00969039
AV93 (ΔmscLS)	sgRNA GØ-RØ	A	4.38586	0.0272	0.0104181
AV93 (ΔmscLS)	sgRNA GØ-RØ	A	4.42399	0.0286	0.0109544
AV93 (ΔmscLS)	sgRNA GØ-RØ	A	4.46213	0.0291	0.0111459
AV93 (ΔmscLS)	sgRNA GØ-RØ	A	4.50026	0.0297	0.0113757
AV93 (ΔmscLS)	sgRNA GØ-RØ	A	4.5384	0.0302	0.0115672
AV93 (ΔmscLS)	sgRNA GØ-RØ	A	4.57653	0.0303	0.0116055
AV93 (ΔmscLS)	sgRNA GØ-RØ	A	4.61467	0.0316	0.0121034
AV93 (ΔmscLS)	sgRNA GØ-RØ	A	4.6528	0.0323	0.0123715
AV93 (ΔmscLS)	sgRNA GØ-RØ	A	4.69094	0.0329	0.0126013
AV93 (ΔmscLS)	sgRNA GØ-RØ	A	4.72907	0.0336	0.0128695
AV93 (ΔmscLS)	sgRNA GØ-RØ	A	4.76721	0.0341	0.013061
AV93 (ΔmscLS)	sgRNA GØ-RØ	A	4.80535	0.0344	0.0131759
AV93 (ΔmscLS)	sgRNA GØ-RØ	A	4.84348	0.0355	0.0135972
AV93 (ΔmscLS)	sgRNA GØ-RØ	A	4.88162	0.036	0.0137887
AV93 (ΔmscLS)	sgRNA GØ-RØ	A	4.91976	0.037	0.0141717
AV93 (ΔmscLS)	sgRNA GØ-RØ	A	4.95789	0.0364	0.0139419
AV93 (ΔmscLS)	sgRNA GØ-RØ	A	4.99603	0.0383	0.0146696
AV93 (ΔmscLS)	sgRNA GØ-RØ	A	5.03417	0.0393	0.0150527
AV93 (ΔmscLS)	sgRNA GØ-RØ	A	5.0723	0.0398	0.0152442
AV93 (ΔmscLS)	sgRNA GØ-RØ	A	5.11044	0.0403	0.0154357
AV93 (ΔmscLS)	sgRNA GØ-RØ	A	5.14858	0.0416	0.0159336
AV93 (ΔmscLS)	sgRNA GØ-RØ	A	5.18671	0.0416	0.0159336
AV93 (ΔmscLS)	sgRNA GØ-RØ	A	5.22485	0.0431	0.0165081
AV93 (ΔmscLS)	sgRNA GØ-RØ	A	5.26298	0.0439	0.0168146
AV93 (ΔmscLS)	sgRNA GØ-RØ	A	5.30112	0.0449	0.0171976
AV93 (ΔmscLS)	sgRNA GØ-RØ	A	5.33925	0.0454	0.0173891
AV93 (ΔmscLS)	sgRNA GØ-RØ	A	5.37739	0.0464	0.0177721
AV93 (ΔmscLS)	sgRNA GØ-RØ	A	5.41553	0.0477	0.01827
AV93 (ΔmscLS)	sgRNA GØ-RØ	A	5.45366	0.0483	0.0184998
AV93 (ΔmscLS)	sgRNA GØ-RØ	A	5.4918	0.0486	0.0186147
AV93 (ΔmscLS)	sgRNA GØ-RØ	A	5.52994	0.0497	0.0190361
AV93 (ΔmscLS)	sgRNA GØ-RØ	A	5.56807	0.0516	0.0197638
AV93 (ΔmscLS)	sgRNA GØ-RØ	A	5.64434	0.0529	0.0202617
AV93 (ΔmscLS)	sgRNA GØ-RØ	A	5.79689	0.0533	0.0204149
AV93 (ΔmscLS)	sgRNA GØ-RØ	A	5.95028	0.0516	0.0197638
AV93 (ΔmscLS)	sgRNA GØ-RØ	A	5.98735	0.0502	0.0192276
AV93 (ΔmscLS)	sgRNA GØ-RØ	A	6.02442	0.0513	0.0196489
AV93 (ΔmscLS)	sgRNA GØ-RØ	A	6.06148	0.0523	0.0200319
AV93 (ΔmscLS)	sgRNA GØ-RØ	A	6.09855	0.0515	0.0197255
AV93 (ΔmscLS)	sgRNA GØ-RØ	A	6.13562	0.0542	0.0207597
AV93 (ΔmscLS)	sgRNA GØ-RØ	A	6.17269	0.0532	0.0203766
AV93 (ΔmscLS)	sgRNA GØ-RØ	A	6.20975	0.0533	0.0204149
AV93 (ΔmscLS)	sgRNA GØ-RØ	A	6.24682	0.0561	0.0214874
AV93 (ΔmscLS)	sgRNA GØ-RØ	A	6.28389	0.0563	0.021564
AV93 (ΔmscLS)	sgRNA GØ-RØ	A	6.32096	0.0565	0.0216406
AV93 (ΔmscLS)	sgRNA GØ-RØ	A	6.35803	0.0609	0.0233259
AV93 (ΔmscLS)	sgRNA GØ-RØ	A	6.3951	0.0621	0.0237855
AV93 (ΔmscLS)	sgRNA GØ-RØ	A	6.43216	0.062	0.0237472
AV93 (ΔmscLS)	sgRNA GØ-RØ	A	6.46924	0.0631	0.0241685
AV93 (ΔmscLS)	sgRNA GØ-RØ	A	6.50631	0.0645	0.0247048
AV93 (ΔmscLS)	sgRNA GØ-RØ	A	6.54338	0.0656	0.0251261
AV93 (ΔmscLS)	sgRNA GØ-RØ	A	6.58044	0.0662	0.0253559
AV93 (ΔmscLS)	sgRNA GØ-RØ	A	6.61752	0.0663	0.0253942
AV93 (ΔmscLS)	sgRNA GØ-RØ	A	6.65459	0.0681	0.0260836
AV93 (ΔmscLS)	sgRNA GØ-RØ	A	6.69166	0.0711	0.0272327
AV93 (ΔmscLS)	sgRNA GØ-RØ	A	6.76579	0.072	0.0275774
AV93 (ΔmscLS)	sgRNA GØ-RØ	A	6.80286	0.0702	0.026888
AV93 (ΔmscLS)	sgRNA GØ-RØ	A	6.83993	0.0696	0.0266582
AV93 (ΔmscLS)	sgRNA GØ-RØ	A	6.877	0.0715	0.0273859
AV93 (ΔmscLS)	sgRNA GØ-RØ	A	6.91407	0.0724	0.0277306
AV93 (ΔmscLS)	sgRNA GØ-RØ	A	6.95113	0.0753	0.0288414
AV93 (ΔmscLS)	sgRNA GØ-RØ	A	6.9882	0.0752	0.0288031
AV93 (ΔmscLS)	sgRNA GØ-RØ	A	7.02527	0.0756	0.0289563
AV93 (ΔmscLS)	sgRNA GØ-RØ	A	7.17355	0.0806	0.0308714
AV93 (ΔmscLS)	sgRNA GØ-RØ	A	7.21062	0.0814	0.0311778
AV93 (ΔmscLS)	sgRNA GØ-RØ	A	7.24769	0.0803	0.0307565
AV93 (ΔmscLS)	sgRNA GØ-RØ	A	7.28476	0.0832	0.0318672
AV93 (ΔmscLS)	sgRNA GØ-RØ	A	7.32182	0.0833	0.0319055
AV93 (ΔmscLS)	sgRNA GØ-RØ	A	7.35889	0.0844	0.0323268
AV93 (ΔmscLS)	sgRNA GØ-RØ	A	7.43303	0.0862	0.0330163
AV93 (ΔmscLS)	sgRNA GØ-RØ	A	7.4701	0.0883	0.0338206
AV93 (ΔmscLS)	sgRNA GØ-RØ	A	7.50717	0.0885	0.0338972
AV93 (ΔmscLS)	sgRNA GØ-RØ	A	7.54424	0.0888	0.0340121
AV93 (ΔmscLS)	sgRNA GØ-RØ	A	7.58131	0.0895	0.0342802
AV93 (ΔmscLS)	sgRNA GØ-RØ	A	7.61838	0.0907	0.0347399
AV93 (ΔmscLS)	sgRNA GØ-RØ	A	7.65545	0.093	0.0356208
AV93 (ΔmscLS)	sgRNA GØ-RØ	A	7.69252	0.093	0.0356208
AV93 (ΔmscLS)	sgRNA GØ-RØ	A	7.72958	0.0937	0.0358889
AV93 (ΔmscLS)	sgRNA GØ-RØ	A	7.76665	0.0975	0.0373444
AV93 (ΔmscLS)	sgRNA GØ-RØ	A	7.84079	0.1003	0.0384169
AV93 (ΔmscLS)	sgRNA GØ-RØ	A	7.87786	0.0999	0.0382636
AV93 (ΔmscLS)	sgRNA GØ-RØ	A	7.91492	0.1034	0.0396042
AV93 (ΔmscLS)	sgRNA GØ-RØ	A	7.95199	0.1031	0.0394893
AV93 (ΔmscLS)	sgRNA GØ-RØ	A	7.98906	0.1052	0.0402936
AV93 (ΔmscLS)	sgRNA GØ-RØ	A	8.02613	0.1078	0.0412895
AV93 (ΔmscLS)	sgRNA GØ-RØ	A	8.0632	0.1071	0.0410214
AV93 (ΔmscLS)	sgRNA GØ-RØ	A	8.10027	0.1108	0.0424386
AV93 (ΔmscLS)	sgRNA GØ-RØ	A	8.17441	0.1115	0.0427067
AV93 (ΔmscLS)	sgRNA GØ-RØ	A	8.21148	0.1128	0.0432046
AV93 (ΔmscLS)	sgRNA GØ-RØ	A	8.24854	0.117	0.0448133
AV93 (ΔmscLS)	sgRNA GØ-RØ	A	8.28561	0.116	0.0444303
AV93 (ΔmscLS)	sgRNA GØ-RØ	A	8.32268	0.1193	0.0456942
AV93 (ΔmscLS)	sgRNA GØ-RØ	A	8.35975	0.1218	0.0466518
AV93 (ΔmscLS)	sgRNA GØ-RØ	A	8.39681	0.1216	0.0465752
AV93 (ΔmscLS)	sgRNA GØ-RØ	A	8.43388	0.1239	0.0474561
AV93 (ΔmscLS)	sgRNA GØ-RØ	A	8.47095	0.1262	0.0483371
AV93 (ΔmscLS)	sgRNA GØ-RØ	A	8.50802	0.1248	0.0478008
AV93 (ΔmscLS)	sgRNA GØ-RØ	A	8.54509	0.1259	0.0482222
AV93 (ΔmscLS)	sgRNA GØ-RØ	A	8.58215	0.1293	0.0495244
AV93 (ΔmscLS)	sgRNA GØ-RØ	A	8.61922	0.1303	0.0499074
AV93 (ΔmscLS)	sgRNA GØ-RØ	A	8.65629	0.1326	0.0507884
AV93 (ΔmscLS)	sgRNA GØ-RØ	A	8.73043	0.1332	0.0510182
AV93 (ΔmscLS)	sgRNA GØ-RØ	A	8.7675	0.1365	0.0522822
AV93 (ΔmscLS)	sgRNA GØ-RØ	A	8.80457	0.1369	0.0524354
AV93 (ΔmscLS)	sgRNA GØ-RØ	A	8.84164	0.138	0.0528567
AV93 (ΔmscLS)	sgRNA GØ-RØ	A	8.87871	0.1396	0.0534695
AV93 (ΔmscLS)	sgRNA GØ-RØ	A	8.91578	0.141	0.0540057
AV93 (ΔmscLS)	sgRNA GØ-RØ	A	8.95285	0.1432	0.0548484
AV93 (ΔmscLS)	sgRNA GØ-RØ	A	8.98991	0.1461	0.0559591
AV93 (ΔmscLS)	sgRNA GØ-RØ	A	9.02698	0.1474	0.0564571
AV93 (ΔmscLS)	sgRNA GØ-RØ	A	9.06405	0.1496	0.0572997
AV93 (ΔmscLS)	sgRNA GØ-RØ	A	9.10112	0.1505	0.0576444
AV93 (ΔmscLS)	sgRNA GØ-RØ	A	9.13819	0.153	0.058602
AV93 (ΔmscLS)	sgRNA GØ-RØ	A	9.17526	0.1551	0.0594063
AV93 (ΔmscLS)	sgRNA GØ-RØ	A	9.21233	0.1573	0.060249
AV93 (ΔmscLS)	sgRNA GØ-RØ	A	9.2494	0.1582	0.0605937
AV93 (ΔmscLS)	sgRNA GØ-RØ	A	9.28647	0.1611	0.0617044
AV93 (ΔmscLS)	sgRNA GØ-RØ	A	9.32354	0.164	0.0628152
AV93 (ΔmscLS)	sgRNA GØ-RØ	A	9.3606	0.166	0.0635812
AV93 (ΔmscLS)	sgRNA GØ-RØ	A	9.39767	0.1684	0.0645005
AV93 (ΔmscLS)	sgRNA GØ-RØ	A	9.43474	0.1712	0.0655729
AV93 (ΔmscLS)	sgRNA GØ-RØ	A	9.47181	0.1715	0.0656878
AV93 (ΔmscLS)	sgRNA GØ-RØ	A	9.50888	0.1736	0.0664922
AV93 (ΔmscLS)	sgRNA GØ-RØ	A	9.54595	0.1747	0.0669135
AV93 (ΔmscLS)	sgRNA GØ-RØ	A	9.58302	0.179	0.0685605
AV93 (ΔmscLS)	sgRNA GØ-RØ	A	9.62009	0.1803	0.0690584
AV93 (ΔmscLS)	sgRNA GØ-RØ	A	9.65716	0.1846	0.0707054
AV93 (ΔmscLS)	sgRNA GØ-RØ	A	9.69423	0.1862	0.0713182
AV93 (ΔmscLS)	sgRNA GØ-RØ	A	9.7313	0.1869	0.0715863
AV93 (ΔmscLS)	sgRNA GØ-RØ	A	9.76836	0.1889	0.0723524
AV93 (ΔmscLS)	sgRNA GØ-RØ	A	9.80543	0.1918	0.0734631
AV93 (ΔmscLS)	sgRNA GØ-RØ	A	9.8425	0.1935	0.0741143
AV93 (ΔmscLS)	sgRNA GØ-RØ	A	9.87957	0.1951	0.0747271
AV93 (ΔmscLS)	sgRNA GØ-RØ	A	9.91664	0.1986	0.0760677
AV93 (ΔmscLS)	sgRNA GØ-RØ	A	9.95371	0.2014	0.0771401
AV93 (ΔmscLS)	sgRNA GØ-RØ	A	9.99077	0.2035	0.0779445
AV44	sgRNA G14-R20	B	2.02136	0.0647	0.00620475
AV44	sgRNA G14-R20	B	2.0595	0.0654	0.00627188
AV44	sgRNA G14-R20	B	2.09764	0.0672	0.0064445
AV44	sgRNA G14-R20	B	2.13578	0.0679	0.00651163
AV44	sgRNA G14-R20	B	2.17391	0.0678	0.00650204
AV44	sgRNA G14-R20	B	2.21205	0.0691	0.00662671
AV44	sgRNA G14-R20	B	2.25019	0.0704	0.00675138
AV44	sgRNA G14-R20	B	2.28833	0.0711	0.00681851
AV44	sgRNA G14-R20	B	2.32646	0.0716	0.00686646
AV44	sgRNA G14-R20	B	2.3646	0.0721	0.00691441
AV44	sgRNA G14-R20	B	2.40274	0.0728	0.00698154
AV44	sgRNA G14-R20	B	2.44087	0.0739	0.00708703
AV44	sgRNA G14-R20	B	2.47901	0.0756	0.00725006
AV44	sgRNA G14-R20	B	2.51715	0.0772	0.0074035
AV44	sgRNA G14-R20	B	2.55528	0.0773	0.00741309
AV44	sgRNA G14-R20	B	2.59342	0.0783	0.00750899
AV44	sgRNA G14-R20	B	2.63155	0.0785	0.00752817
AV44	sgRNA G14-R20	B	2.66969	0.0798	0.00765284
AV44	sgRNA G14-R20	B	2.70783	0.082	0.00786382
AV44	sgRNA G14-R20	B	2.74596	0.0829	0.00795013
AV44	sgRNA G14-R20	B	2.7841	0.0823	0.00789259
AV44	sgRNA G14-R20	B	2.82224	0.0846	0.00811316
AV44	sgRNA G14-R20	B	2.86037	0.0852	0.0081707
AV44	sgRNA G14-R20	B	2.89851	0.0853	0.00818029
AV44	sgRNA G14-R20	B	2.93664	0.0871	0.00835291
AV44	sgRNA G14-R20	B	2.97478	0.0883	0.00846799
AV44	sgRNA G14-R20	B	3.01291	0.0897	0.00860225
AV44	sgRNA G14-R20	B	3.05105	0.0903	0.00865979
AV44	sgRNA G14-R20	B	3.08919	0.0901	0.00864061
AV44	sgRNA G14-R20	B	3.12732	0.0922	0.008842
AV44	sgRNA G14-R20	B	3.16546	0.0931	0.00892831
AV44	sgRNA G14-R20	B	3.2036	0.092	0.00882282
AV44	sgRNA G14-R20	B	3.24174	0.0952	0.00912971
AV44	sgRNA G14-R20	B	3.27987	0.0961	0.00921602
AV44	sgRNA G14-R20	B	3.31801	0.0972	0.00932151
AV44	sgRNA G14-R20	B	3.35615	0.0985	0.00944618
AV44	sgRNA G14-R20	B	3.39429	0.0996	0.00955167
AV44	sgRNA G14-R20	B	3.43242	0.1007	0.00965716
AV44	sgRNA G14-R20	B	3.47056	0.1017	0.00975306
AV44	sgRNA G14-R20	B	3.5087	0.1025	0.00982978
AV44	sgRNA G14-R20	B	3.54683	0.1047	0.0100408
AV44	sgRNA G14-R20	B	3.58497	0.1059	0.0101558
AV44	sgRNA G14-R20	B	3.62311	0.1061	0.010175
AV44	sgRNA G14-R20	B	3.66125	0.1094	0.0104915
AV44	sgRNA G14-R20	B	3.69939	0.1098	0.0105298
AV44	sgRNA G14-R20	B	3.73753	0.1106	0.0106066
AV44	sgRNA G14-R20	B	3.77566	0.1123	0.0107696
AV44	sgRNA G14-R20	B	3.8138	0.1134	0.0108751
AV44	sgRNA G14-R20	B	3.85193	0.1146	0.0109902
AV44	sgRNA G14-R20	B	3.89007	0.1158	0.0111053
AV44	sgRNA G14-R20	B	3.92821	0.1181	0.0113258
AV44	sgRNA G14-R20	B	3.96635	0.1188	0.011393
AV44	sgRNA G14-R20	B	4.00448	0.1196	0.0114697
AV44	sgRNA G14-R20	B	4.04262	0.1206	0.0115656
AV44	sgRNA G14-R20	B	4.08076	0.122	0.0116998
AV44	sgRNA G14-R20	B	4.1189	0.123	0.0117957
AV44	sgRNA G14-R20	B	4.15703	0.1245	0.0119396
AV44	sgRNA G14-R20	B	4.19517	0.1286	0.0123328
AV44	sgRNA G14-R20	B	4.23331	0.1282	0.0122944
AV44	sgRNA G14-R20	B	4.27144	0.1303	0.0124958
AV44	sgRNA G14-R20	B	4.30958	0.1299	0.0124574
AV44	sgRNA G14-R20	B	4.34771	0.1342	0.0128698
AV44	sgRNA G14-R20	B	4.38586	0.136	0.0130424
AV44	sgRNA G14-R20	B	4.42399	0.136	0.0130424
AV44	sgRNA G14-R20	B	4.46213	0.1379	0.0132246
AV44	sgRNA G14-R20	B	4.50026	0.141	0.0135219
AV44	sgRNA G14-R20	B	4.5384	0.1421	0.0136274
AV44	sgRNA G14-R20	B	4.57653	0.1454	0.0139439
AV44	sgRNA G14-R20	B	4.61467	0.1462	0.0140206
AV44	sgRNA G14-R20	B	4.6528	0.15	0.014385
AV44	sgRNA G14-R20	B	4.69094	0.1504	0.0144234
AV44	sgRNA G14-R20	B	4.72907	0.1529	0.0146632
AV44	sgRNA G14-R20	B	4.76721	0.1555	0.0149125
AV44	sgRNA G14-R20	B	4.80535	0.156	0.0149604
AV44	sgRNA G14-R20	B	4.84348	0.1576	0.0151139
AV44	sgRNA G14-R20	B	4.88162	0.1605	0.015392
AV44	sgRNA G14-R20	B	4.91976	0.162	0.0155358
AV44	sgRNA G14-R20	B	4.95789	0.1634	0.0156701
AV44	sgRNA G14-R20	B	4.99603	0.1652	0.0158427
AV44	sgRNA G14-R20	B	5.03417	0.1677	0.0160825
AV44	sgRNA G14-R20	B	5.0723	0.1711	0.0164085
AV44	sgRNA G14-R20	B	5.11044	0.1715	0.0164469
AV44	sgRNA G14-R20	B	5.14858	0.1747	0.0167538
AV44	sgRNA G14-R20	B	5.18671	0.1773	0.0170031
AV44	sgRNA G14-R20	B	5.22485	0.1791	0.0171757
AV44	sgRNA G14-R20	B	5.26298	0.1819	0.0174443
AV44	sgRNA G14-R20	B	5.30112	0.1832	0.0175689
AV44	sgRNA G14-R20	B	5.33925	0.1851	0.0177511
AV44	sgRNA G14-R20	B	5.37739	0.1878	0.0180101
AV44	sgRNA G14-R20	B	5.41553	0.1905	0.018269
AV44	sgRNA G14-R20	B	5.45366	0.1925	0.0184608
AV44	sgRNA G14-R20	B	5.4918	0.1939	0.0185951
AV44	sgRNA G14-R20	B	5.52994	0.1989	0.0190746
AV44	sgRNA G14-R20	B	5.56807	0.2017	0.0193431
AV44	sgRNA G14-R20	B	5.60621	0.2033	0.0194965
AV44	sgRNA G14-R20	B	5.64434	0.2042	0.0195828
AV44	sgRNA G14-R20	B	5.68248	0.2085	0.0199952
AV44	sgRNA G14-R20	B	5.72062	0.2096	0.0201007
AV44	sgRNA G14-R20	B	5.75875	0.2108	0.0202158
AV44	sgRNA G14-R20	B	5.95028	0.2074	0.0198897
AV44	sgRNA G14-R20	B	6.02442	0.207	0.0198514
AV44	sgRNA G14-R20	B	6.06148	0.2073	0.0198801
AV44	sgRNA G14-R20	B	6.09855	0.2114	0.0202733
AV44	sgRNA G14-R20	B	6.13562	0.2124	0.0203692
AV44	sgRNA G14-R20	B	6.17269	0.2129	0.0204172
AV44	sgRNA G14-R20	B	6.20975	0.2135	0.0204747
AV44	sgRNA G14-R20	B	6.28389	0.2115	0.0202829
AV44	sgRNA G14-R20	B	6.32096	0.2106	0.0201966
AV44	sgRNA G14-R20	B	6.35803	0.2142	0.0205418
AV44	sgRNA G14-R20	B	6.3951	0.2159	0.0207049
AV44	sgRNA G14-R20	B	6.43216	0.2185	0.0209542
AV44	sgRNA G14-R20	B	6.46924	0.2206	0.0211556
AV44	sgRNA G14-R20	B	6.50631	0.2235	0.0214337
AV44	sgRNA G14-R20	B	6.54338	0.2255	0.0216255
AV44	sgRNA G14-R20	B	6.58044	0.2272	0.0217885
AV44	sgRNA G14-R20	B	6.61752	0.2284	0.0219036
AV44	sgRNA G14-R20	B	6.65459	0.2297	0.0220283
AV44	sgRNA G14-R20	B	6.69166	0.2327	0.022316
AV44	sgRNA G14-R20	B	6.76579	0.2339	0.0224311
AV44	sgRNA G14-R20	B	6.80286	0.2344	0.022479
AV44	sgRNA G14-R20	B	6.83993	0.2365	0.0226804
AV44	sgRNA G14-R20	B	6.877	0.2365	0.0226804
AV44	sgRNA G14-R20	B	6.91407	0.2371	0.022738
AV44	sgRNA G14-R20	B	6.95113	0.2388	0.022901
AV44	sgRNA G14-R20	B	6.9882	0.2404	0.0230544
AV44	sgRNA G14-R20	B	7.02527	0.2426	0.0232654
AV44	sgRNA G14-R20	B	7.06234	0.2442	0.0234188
AV44	sgRNA G14-R20	B	7.09941	0.2461	0.0236011
AV44	sgRNA G14-R20	B	7.13648	0.2477	0.0237545
AV44	sgRNA G14-R20	B	7.17355	0.2478	0.0237641
AV44	sgRNA G14-R20	B	7.21062	0.248	0.0237833
AV44	sgRNA G14-R20	B	7.24769	0.2488	0.02386
AV44	sgRNA G14-R20	B	7.28476	0.2504	0.0240134
AV44	sgRNA G14-R20	B	7.32182	0.2515	0.0241189
AV44	sgRNA G14-R20	B	7.35889	0.2519	0.0241573
AV44	sgRNA G14-R20	B	7.39596	0.2538	0.0243395
AV44	sgRNA G14-R20	B	7.43303	0.2531	0.0242724
AV44	sgRNA G14-R20	B	7.4701	0.2556	0.0245121
AV44	sgRNA G14-R20	B	7.50717	0.2561	0.0245601
AV44	sgRNA G14-R20	B	7.54424	0.2586	0.0247998
AV44	sgRNA G14-R20	B	7.58131	0.2592	0.0248573
AV44	sgRNA G14-R20	B	7.61838	0.2609	0.0250204
AV44	sgRNA G14-R20	B	7.65545	0.2622	0.025145
AV44	sgRNA G14-R20	B	7.69252	0.2642	0.0253368
AV44	sgRNA G14-R20	B	7.72958	0.2655	0.0254615
AV44	sgRNA G14-R20	B	7.76665	0.2679	0.0256917
AV44	sgRNA G14-R20	B	7.80372	0.2681	0.0257109
AV44	sgRNA G14-R20	B	7.84079	0.271	0.025989
AV44	sgRNA G14-R20	B	7.87786	0.2719	0.0260753
AV44	sgRNA G14-R20	B	7.91492	0.2739	0.0262671
AV44	sgRNA G14-R20	B	7.95199	0.2757	0.0264397
AV44	sgRNA G14-R20	B	7.98906	0.278	0.0266603
AV44	sgRNA G14-R20	B	8.02613	0.2798	0.0268329
AV44	sgRNA G14-R20	B	8.0632	0.2811	0.0269576
AV44	sgRNA G14-R20	B	8.10027	0.2844	0.027274
AV44	sgRNA G14-R20	B	8.13734	0.2856	0.0273891
AV44	sgRNA G14-R20	B	8.17441	0.2866	0.027485
AV44	sgRNA G14-R20	B	8.21148	0.2898	0.0277919
AV44	sgRNA G14-R20	B	8.24854	0.2911	0.0279166
AV44	sgRNA G14-R20	B	8.28561	0.2945	0.0282426
AV44	sgRNA G14-R20	B	8.32268	0.2952	0.0283098
AV44	sgRNA G14-R20	B	8.35975	0.2966	0.028444
AV44	sgRNA G14-R20	B	8.39681	0.2991	0.0286838
AV44	sgRNA G14-R20	B	8.43388	0.3003	0.0287988
AV44	sgRNA G14-R20	B	8.47095	0.3017	0.0289331
AV44	sgRNA G14-R20	B	8.50802	0.3052	0.0292688
AV44	sgRNA G14-R20	B	8.54509	0.3062	0.0293647
AV44	sgRNA G14-R20	B	8.58215	0.3083	0.0295661
AV44	sgRNA G14-R20	B	8.61922	0.3108	0.0298058
AV44	sgRNA G14-R20	B	8.65629	0.3126	0.0299784
AV44	sgRNA G14-R20	B	8.69336	0.3157	0.0302757
AV44	sgRNA G14-R20	B	8.73043	0.3185	0.0305442
AV44	sgRNA G14-R20	B	8.7675	0.3204	0.0307264
AV44	sgRNA G14-R20	B	8.80457	0.3229	0.0309662
AV44	sgRNA G14-R20	B	8.84164	0.3256	0.0312251
AV44	sgRNA G14-R20	B	8.87871	0.3281	0.0314649
AV44	sgRNA G14-R20	B	8.91578	0.3303	0.0316759
AV44	sgRNA G14-R20	B	8.95285	0.3326	0.0318964
AV44	sgRNA G14-R20	B	8.98991	0.3361	0.0322321
AV44	sgRNA G14-R20	B	9.02698	0.3373	0.0323472
AV44	sgRNA G14-R20	B	9.06405	0.3403	0.0326349
AV44	sgRNA G14-R20	B	9.10112	0.3426	0.0328554
AV44	sgRNA G14-R20	B	9.13819	0.3447	0.0330568
AV44	sgRNA G14-R20	B	9.17526	0.3463	0.0332103
AV44	sgRNA G14-R20	B	9.21233	0.3504	0.0336035
AV44	sgRNA G14-R20	B	9.2494	0.3524	0.0337953
AV44	sgRNA G14-R20	B	9.28647	0.3542	0.0339679
AV44	sgRNA G14-R20	B	9.32354	0.3574	0.0342748
AV44	sgRNA G14-R20	B	9.3606	0.3598	0.0345049
AV44	sgRNA G14-R20	B	9.39767	0.3623	0.0347447
AV44	sgRNA G14-R20	B	9.43474	0.3658	0.0350803
AV44	sgRNA G14-R20	B	9.47181	0.3679	0.0352817
AV44	sgRNA G14-R20	B	9.50888	0.3704	0.0355215
AV44	sgRNA G14-R20	B	9.54595	0.3725	0.0357228
AV44	sgRNA G14-R20	B	9.58302	0.3748	0.0359434
AV44	sgRNA G14-R20	B	9.62009	0.3779	0.0362407
AV44	sgRNA G14-R20	B	9.65716	0.3798	0.0364229
AV44	sgRNA G14-R20	B	9.69423	0.3822	0.0366531
AV44	sgRNA G14-R20	B	9.7313	0.3857	0.0369887
AV44	sgRNA G14-R20	B	9.76836	0.3867	0.0370846
AV44	sgRNA G14-R20	B	9.80543	0.3903	0.0374299
AV44	sgRNA G14-R20	B	9.8425	0.3932	0.037708
AV44	sgRNA G14-R20	B	9.87957	0.3955	0.0379286
AV44	sgRNA G14-R20	B	9.91664	0.3981	0.0381779
AV44	sgRNA G14-R20	B	9.95371	0.401	0.038456
AV44	sgRNA G14-R20	B	9.99077	0.404	0.0387437
AV44	sgRNA GØ-RØ	C	2.02136	0.0102	0.00292264
AV44	sgRNA GØ-RØ	C	2.0595	0.0102	0.00292264
AV44	sgRNA GØ-RØ	C	2.09764	0.0107	0.0030659
AV44	sgRNA GØ-RØ	C	2.13578	0.0109	0.00312321
AV44	sgRNA GØ-RØ	C	2.17391	0.0115	0.00329513
AV44	sgRNA GØ-RØ	C	2.21205	0.0114	0.00326648
AV44	sgRNA GØ-RØ	C	2.25019	0.0112	0.00320917
AV44	sgRNA GØ-RØ	C	2.28833	0.0114	0.00326648
AV44	sgRNA GØ-RØ	C	2.32646	0.0116	0.00332378
AV44	sgRNA GØ-RØ	C	2.3646	0.0121	0.00346705
AV44	sgRNA GØ-RØ	C	2.40274	0.0123	0.00352436
AV44	sgRNA GØ-RØ	C	2.44087	0.0125	0.00358166
AV44	sgRNA GØ-RØ	C	2.47901	0.0128	0.00366762
AV44	sgRNA GØ-RØ	C	2.51715	0.0133	0.00381089
AV44	sgRNA GØ-RØ	C	2.55528	0.0131	0.00375358
AV44	sgRNA GØ-RØ	C	2.59342	0.0137	0.0039255
AV44	sgRNA GØ-RØ	C	2.63155	0.0142	0.00406877
AV44	sgRNA GØ-RØ	C	2.66969	0.0134	0.00383954
AV44	sgRNA GØ-RØ	C	2.70783	0.0145	0.00415473
AV44	sgRNA GØ-RØ	C	2.74596	0.0152	0.0043553
AV44	sgRNA GØ-RØ	C	2.7841	0.015	0.00429799
AV44	sgRNA GØ-RØ	C	2.82224	0.0156	0.00446991
AV44	sgRNA GØ-RØ	C	2.86037	0.0159	0.00455587
AV44	sgRNA GØ-RØ	C	2.89851	0.0161	0.00461318
AV44	sgRNA GØ-RØ	C	2.93664	0.0163	0.00467049
AV44	sgRNA GØ-RØ	C	2.97478	0.017	0.00487106
AV44	sgRNA GØ-RØ	C	3.01291	0.0172	0.00492837
AV44	sgRNA GØ-RØ	C	3.05105	0.0172	0.00492837
AV44	sgRNA GØ-RØ	C	3.08919	0.0172	0.00492837
AV44	sgRNA GØ-RØ	C	3.12732	0.0178	0.00510029
AV44	sgRNA GØ-RØ	C	3.16546	0.0186	0.00532951
AV44	sgRNA GØ-RØ	C	3.2036	0.019	0.00544413
AV44	sgRNA GØ-RØ	C	3.24174	0.0196	0.00561605
AV44	sgRNA GØ-RØ	C	3.27987	0.0196	0.00561605
AV44	sgRNA GØ-RØ	C	3.31801	0.0202	0.00578797
AV44	sgRNA GØ-RØ	C	3.35615	0.0204	0.00584527
AV44	sgRNA GØ-RØ	C	3.39429	0.0205	0.00587393
AV44	sgRNA GØ-RØ	C	3.43242	0.0212	0.0060745
AV44	sgRNA GØ-RØ	C	3.47056	0.0215	0.00616046
AV44	sgRNA GØ-RØ	C	3.5087	0.0219	0.00627507
AV44	sgRNA GØ-RØ	C	3.54683	0.0223	0.00638968
AV44	sgRNA GØ-RØ	C	3.58497	0.023	0.00659026
AV44	sgRNA GØ-RØ	C	3.62311	0.0232	0.00664756
AV44	sgRNA GØ-RØ	C	3.66125	0.024	0.00687679
AV44	sgRNA GØ-RØ	C	3.69939	0.0245	0.00702006
AV44	sgRNA GØ-RØ	C	3.73753	0.025	0.00716332
AV44	sgRNA GØ-RØ	C	3.77566	0.0256	0.00733524
AV44	sgRNA GØ-RØ	C	3.8138	0.0262	0.00750716
AV44	sgRNA GØ-RØ	C	3.85193	0.0264	0.00756447
AV44	sgRNA GØ-RØ	C	3.89007	0.0265	0.00759312
AV44	sgRNA GØ-RØ	C	3.92821	0.0274	0.007851
AV44	sgRNA GØ-RØ	C	3.96635	0.0274	0.007851
AV44	sgRNA GØ-RØ	C	4.00448	0.0285	0.00816619
AV44	sgRNA GØ-RØ	C	4.04262	0.0294	0.00842407
AV44	sgRNA GØ-RØ	C	4.08076	0.029	0.00830946
AV44	sgRNA GØ-RØ	C	4.1189	0.0301	0.00862464
AV44	sgRNA GØ-RØ	C	4.15703	0.0309	0.00885387
AV44	sgRNA GØ-RØ	C	4.19517	0.0316	0.00905444
AV44	sgRNA GØ-RØ	C	4.23331	0.0324	0.00928367
AV44	sgRNA GØ-RØ	C	4.27144	0.0334	0.0095702
AV44	sgRNA GØ-RØ	C	4.30958	0.0334	0.0095702
AV44	sgRNA GØ-RØ	C	4.34771	0.0344	0.00985673
AV44	sgRNA GØ-RØ	C	4.38586	0.035	0.0100287
AV44	sgRNA GØ-RØ	C	4.42399	0.0357	0.0102292
AV44	sgRNA GØ-RØ	C	4.46213	0.0366	0.0104871
AV44	sgRNA GØ-RØ	C	4.50026	0.0369	0.0105731
AV44	sgRNA GØ-RØ	C	4.5384	0.0377	0.0108023
AV44	sgRNA GØ-RØ	C	4.57653	0.0381	0.0109169
AV44	sgRNA GØ-RØ	C	4.61467	0.0395	0.0113181
AV44	sgRNA GØ-RØ	C	4.6528	0.0409	0.0117192
AV44	sgRNA GØ-RØ	C	4.69094	0.041	0.0117479
AV44	sgRNA GØ-RØ	C	4.72907	0.0425	0.0121777
AV44	sgRNA GØ-RØ	C	4.76721	0.0428	0.0122636
AV44	sgRNA GØ-RØ	C	4.80535	0.0436	0.0124928
AV44	sgRNA GØ-RØ	C	4.84348	0.0445	0.0127507
AV44	sgRNA GØ-RØ	C	4.88162	0.0454	0.0130086
AV44	sgRNA GØ-RØ	C	4.91976	0.0461	0.0132092
AV44	sgRNA GØ-RØ	C	4.95789	0.0475	0.0136103
AV44	sgRNA GØ-RØ	C	4.99603	0.0483	0.0138395
AV44	sgRNA GØ-RØ	C	5.03417	0.0491	0.0140688
AV44	sgRNA GØ-RØ	C	5.0723	0.0501	0.0143553
AV44	sgRNA GØ-RØ	C	5.11044	0.0508	0.0145559
AV44	sgRNA GØ-RØ	C	5.14858	0.0523	0.0149857
AV44	sgRNA GØ-RØ	C	5.18671	0.0536	0.0153582
AV44	sgRNA GØ-RØ	C	5.22485	0.0541	0.0155014
AV44	sgRNA GØ-RØ	C	5.26298	0.0554	0.0158739
AV44	sgRNA GØ-RØ	C	5.30112	0.056	0.0160458
AV44	sgRNA GØ-RØ	C	5.33925	0.0575	0.0164756
AV44	sgRNA GØ-RØ	C	5.37739	0.0584	0.0167335
AV44	sgRNA GØ-RØ	C	5.41553	0.0599	0.0171633
AV44	sgRNA GØ-RØ	C	5.45366	0.0608	0.0174212
AV44	sgRNA GØ-RØ	C	5.4918	0.0626	0.017937
AV44	sgRNA GØ-RØ	C	5.52994	0.0636	0.0182235
AV44	sgRNA GØ-RØ	C	5.56807	0.0645	0.0184814
AV44	sgRNA GØ-RØ	C	5.60621	0.0666	0.0190831
AV44	sgRNA GØ-RØ	C	5.64434	0.0676	0.0193696
AV44	sgRNA GØ-RØ	C	5.68248	0.0693	0.0198567
AV44	sgRNA GØ-RØ	C	5.72062	0.0704	0.0201719
AV44	sgRNA GØ-RØ	C	5.75875	0.0716	0.0205158
AV44	sgRNA GØ-RØ	C	5.79689	0.0733	0.0210029
AV44	sgRNA GØ-RØ	C	5.95028	0.0711	0.0203725
AV44	sgRNA GØ-RØ	C	5.98735	0.0714	0.0204585
AV44	sgRNA GØ-RØ	C	6.02442	0.073	0.0209169
AV44	sgRNA GØ-RØ	C	6.06148	0.0725	0.0207736
AV44	sgRNA GØ-RØ	C	6.09855	0.0742	0.0212607
AV44	sgRNA GØ-RØ	C	6.13562	0.0752	0.0215473
AV44	sgRNA GØ-RØ	C	6.17269	0.0765	0.0219198
AV44	sgRNA GØ-RØ	C	6.20975	0.0787	0.0225501
AV44	sgRNA GØ-RØ	C	6.24682	0.08	0.0229226
AV44	sgRNA GØ-RØ	C	6.28389	0.081	0.0232092
AV44	sgRNA GØ-RØ	C	6.32096	0.0815	0.0233524
AV44	sgRNA GØ-RØ	C	6.35803	0.082	0.0234957
AV44	sgRNA GØ-RØ	C	6.3951	0.0828	0.0237249
AV44	sgRNA GØ-RØ	C	6.43216	0.0833	0.0238682
AV44	sgRNA GØ-RØ	C	6.46924	0.0852	0.0244126
AV44	sgRNA GØ-RØ	C	6.50631	0.0866	0.0248138
AV44	sgRNA GØ-RØ	C	6.54338	0.088	0.0252149
AV44	sgRNA GØ-RØ	C	6.58044	0.0896	0.0256734
AV44	sgRNA GØ-RØ	C	6.61752	0.0906	0.0259599
AV44	sgRNA GØ-RØ	C	6.65459	0.0917	0.0262751
AV44	sgRNA GØ-RØ	C	6.69166	0.0929	0.0266189
AV44	sgRNA GØ-RØ	C	6.72872	0.0946	0.027106
AV44	sgRNA GØ-RØ	C	6.76579	0.0945	0.0270774
AV44	sgRNA GØ-RØ	C	6.80286	0.0954	0.0273352
AV44	sgRNA GØ-RØ	C	6.83993	0.0972	0.027851
AV44	sgRNA GØ-RØ	C	6.877	0.0976	0.0279656
AV44	sgRNA GØ-RØ	C	6.91407	0.0988	0.0283095
AV44	sgRNA GØ-RØ	C	6.95113	0.1007	0.0288539
AV44	sgRNA GØ-RØ	C	6.9882	0.1018	0.0291691
AV44	sgRNA GØ-RØ	C	7.02527	0.103	0.0295129
AV44	sgRNA GØ-RØ	C	7.06234	0.1043	0.0298854
AV44	sgRNA GØ-RØ	C	7.09941	0.1061	0.0304011
AV44	sgRNA GØ-RØ	C	7.13648	0.1078	0.0308883
AV44	sgRNA GØ-RØ	C	7.17355	0.1081	0.0309742
AV44	sgRNA GØ-RØ	C	7.21062	0.1102	0.0315759
AV44	sgRNA GØ-RØ	C	7.24769	0.1114	0.0319198
AV44	sgRNA GØ-RØ	C	7.28476	0.1125	0.032235
AV44	sgRNA GØ-RØ	C	7.32182	0.1147	0.0328653
AV44	sgRNA GØ-RØ	C	7.35889	0.1152	0.0330086
AV44	sgRNA GØ-RØ	C	7.39596	0.116	0.0332378
AV44	sgRNA GØ-RØ	C	7.43303	0.1164	0.0333524
AV44	sgRNA GØ-RØ	C	7.4701	0.1181	0.0338395
AV44	sgRNA GØ-RØ	C	7.50717	0.1196	0.0342693
AV44	sgRNA GØ-RØ	C	7.54424	0.121	0.0346705
AV44	sgRNA GØ-RØ	C	7.58131	0.1222	0.0350143
AV44	sgRNA GØ-RØ	C	7.61838	0.1233	0.0353295
AV44	sgRNA GØ-RØ	C	7.65545	0.1254	0.0359312
AV44	sgRNA GØ-RØ	C	7.69252	0.1272	0.036447
AV44	sgRNA GØ-RØ	C	7.72958	0.1284	0.0367908
AV44	sgRNA GØ-RØ	C	7.76665	0.1301	0.0372779
AV44	sgRNA GØ-RØ	C	7.80372	0.1312	0.0375931
AV44	sgRNA GØ-RØ	C	7.84079	0.1324	0.037937
AV44	sgRNA GØ-RØ	C	7.87786	0.1339	0.0383668
AV44	sgRNA GØ-RØ	C	7.91492	0.1353	0.0387679
AV44	sgRNA GØ-RØ	C	7.95199	0.1371	0.0392837
AV44	sgRNA GØ-RØ	C	7.98906	0.1375	0.0393983
AV44	sgRNA GØ-RØ	C	8.02613	0.1402	0.0401719
AV44	sgRNA GØ-RØ	C	8.0632	0.1417	0.0406017
AV44	sgRNA GØ-RØ	C	8.10027	0.1436	0.0411461
AV44	sgRNA GØ-RØ	C	8.13734	0.1452	0.0416046
AV44	sgRNA GØ-RØ	C	8.17441	0.1463	0.0419198
AV44	sgRNA GØ-RØ	C	8.21148	0.1484	0.0425215
AV44	sgRNA GØ-RØ	C	8.24854	0.1506	0.0431519
AV44	sgRNA GØ-RØ	C	8.28561	0.151	0.0432665
AV44	sgRNA GØ-RØ	C	8.32268	0.1534	0.0439542
AV44	sgRNA GØ-RØ	C	8.35975	0.1556	0.0445845
AV44	sgRNA GØ-RØ	C	8.39681	0.1573	0.0450716
AV44	sgRNA GØ-RØ	C	8.43388	0.1588	0.0455014
AV44	sgRNA GØ-RØ	C	8.47095	0.1612	0.0461891
AV44	sgRNA GØ-RØ	C	8.50802	0.1625	0.0465616
AV44	sgRNA GØ-RØ	C	8.54509	0.1638	0.0469341
AV44	sgRNA GØ-RØ	C	8.58215	0.1655	0.0474212
AV44	sgRNA GØ-RØ	C	8.61922	0.1683	0.0482235
AV44	sgRNA GØ-RØ	C	8.65629	0.1697	0.0486246
AV44	sgRNA GØ-RØ	C	8.69336	0.1721	0.0493123
AV44	sgRNA GØ-RØ	C	8.73043	0.1737	0.0497708
AV44	sgRNA GØ-RØ	C	8.7675	0.1758	0.0503725
AV44	sgRNA GØ-RØ	C	8.80457	0.1789	0.0512607
AV44	sgRNA GØ-RØ	C	8.84164	0.1797	0.05149
AV44	sgRNA GØ-RØ	C	8.87871	0.1822	0.0522063
AV44	sgRNA GØ-RØ	C	8.91578	0.1839	0.0526934
AV44	sgRNA GØ-RØ	C	8.95285	0.1865	0.0534384
AV44	sgRNA GØ-RØ	C	8.98991	0.1887	0.0540688
AV44	sgRNA GØ-RØ	C	9.02698	0.1901	0.0544699
AV44	sgRNA GØ-RØ	C	9.06405	0.1929	0.0552722
AV44	sgRNA GØ-RØ	C	9.10112	0.1951	0.0559026
AV44	sgRNA GØ-RØ	C	9.13819	0.197	0.056447
AV44	sgRNA GØ-RØ	C	9.17526	0.1995	0.0571633
AV44	sgRNA GØ-RØ	C	9.21233	0.2011	0.0576218
AV44	sgRNA GØ-RØ	C	9.2494	0.2037	0.0583668
AV44	sgRNA GØ-RØ	C	9.28647	0.2071	0.059341
AV44	sgRNA GØ-RØ	C	9.32354	0.2098	0.0601146
AV44	sgRNA GØ-RØ	C	9.3606	0.2114	0.0605731
AV44	sgRNA GØ-RØ	C	9.39767	0.2143	0.061404
AV44	sgRNA GØ-RØ	C	9.43474	0.2174	0.0622923
AV44	sgRNA GØ-RØ	C	9.47181	0.2183	0.0625501
AV44	sgRNA GØ-RØ	C	9.50888	0.2232	0.0639542
AV44	sgRNA GØ-RØ	C	9.54595	0.2249	0.0644413
AV44	sgRNA GØ-RØ	C	9.58302	0.2283	0.0654155
AV44	sgRNA GØ-RØ	C	9.62009	0.2312	0.0662464
AV44	sgRNA GØ-RØ	C	9.65716	0.2336	0.0669341
AV44	sgRNA GØ-RØ	C	9.69423	0.2372	0.0679656
AV44	sgRNA GØ-RØ	C	9.7313	0.239	0.0684814
AV44	sgRNA GØ-RØ	C	9.76836	0.242	0.069341
AV44	sgRNA GØ-RØ	C	9.80543	0.2442	0.0699713
AV44	sgRNA GØ-RØ	C	9.8425	0.2484	0.0711748
AV44	sgRNA GØ-RØ	C	9.87957	0.2505	0.0717765
AV44	sgRNA GØ-RØ	C	9.91664	0.2539	0.0727507
AV44	sgRNA GØ-RØ	C	9.95371	0.2578	0.0738682
AV44	sgRNA GØ-RØ	C	9.99077	0.2605	0.0746418
AV44	sgRNA G14-R20	C	2.02136	0.0052	0.0048037
AV44	sgRNA G14-R20	C	2.0595	0.0044	0.00406467
AV44	sgRNA G14-R20	C	2.09764	0.005	0.00461894
AV44	sgRNA G14-R20	C	2.13578	0.0045	0.00415704
AV44	sgRNA G14-R20	C	2.17391	0.0049	0.00452656
AV44	sgRNA G14-R20	C	2.21205	0.0048	0.00443418
AV44	sgRNA G14-R20	C	2.25019	0.0051	0.00471132
AV44	sgRNA G14-R20	C	2.28833	0.0054	0.00498845
AV44	sgRNA G14-R20	C	2.32646	0.0055	0.00508083
AV44	sgRNA G14-R20	C	2.3646	0.0053	0.00489607
AV44	sgRNA G14-R20	C	2.40274	0.0062	0.00572748
AV44	sgRNA G14-R20	C	2.44087	0.0055	0.00508083
AV44	sgRNA G14-R20	C	2.47901	0.0061	0.0056351
AV44	sgRNA G14-R20	C	2.51715	0.0065	0.00600462
AV44	sgRNA G14-R20	C	2.55528	0.0064	0.00591224
AV44	sgRNA G14-R20	C	2.59342	0.0062	0.00572748
AV44	sgRNA G14-R20	C	2.63155	0.0066	0.006097
AV44	sgRNA G14-R20	C	2.66969	0.0064	0.00591224
AV44	sgRNA G14-R20	C	2.70783	0.0071	0.00655889
AV44	sgRNA G14-R20	C	2.74596	0.0071	0.00655889
AV44	sgRNA G14-R20	C	2.7841	0.0071	0.00655889
AV44	sgRNA G14-R20	C	2.82224	0.0079	0.00729792
AV44	sgRNA G14-R20	C	2.86037	0.0073	0.00674365
AV44	sgRNA G14-R20	C	2.89851	0.0075	0.00692841
AV44	sgRNA G14-R20	C	2.93664	0.0071	0.00655889
AV44	sgRNA G14-R20	C	2.97478	0.0077	0.00711316
AV44	sgRNA G14-R20	C	3.01291	0.007	0.00646651
AV44	sgRNA G14-R20	C	3.05105	0.008	0.0073903
AV44	sgRNA G14-R20	C	3.08919	0.0083	0.00766744
AV44	sgRNA G14-R20	C	3.12732	0.0081	0.00748268
AV44	sgRNA G14-R20	C	3.16546	0.0085	0.00785219
AV44	sgRNA G14-R20	C	3.2036	0.0083	0.00766744
AV44	sgRNA G14-R20	C	3.24174	0.0085	0.00785219
AV44	sgRNA G14-R20	C	3.27987	0.0086	0.00794457
AV44	sgRNA G14-R20	C	3.31801	0.0087	0.00803695
AV44	sgRNA G14-R20	C	3.35615	0.0091	0.00840647
AV44	sgRNA G14-R20	C	3.39429	0.0089	0.00822171
AV44	sgRNA G14-R20	C	3.43242	0.0093	0.00859122
AV44	sgRNA G14-R20	C	3.47056	0.009	0.00831409
AV44	sgRNA G14-R20	C	3.5087	0.0093	0.00859122
AV44	sgRNA G14-R20	C	3.54683	0.0096	0.00886836
AV44	sgRNA G14-R20	C	3.58497	0.0093	0.00859122
AV44	sgRNA G14-R20	C	3.62311	0.0098	0.00905312
AV44	sgRNA G14-R20	C	3.66125	0.0101	0.00933025
AV44	sgRNA G14-R20	C	3.69939	0.0101	0.00933025
AV44	sgRNA G14-R20	C	3.73753	0.0104	0.00960739
AV44	sgRNA G14-R20	C	3.77566	0.0106	0.00979215
AV44	sgRNA G14-R20	C	3.8138	0.0105	0.00969977
AV44	sgRNA G14-R20	C	3.85193	0.0104	0.00960739
AV44	sgRNA G14-R20	C	3.89007	0.0111	0.010254
AV44	sgRNA G14-R20	C	3.92821	0.0112	0.0103464
AV44	sgRNA G14-R20	C	3.96635	0.0111	0.010254
AV44	sgRNA G14-R20	C	4.00448	0.0111	0.010254
AV44	sgRNA G14-R20	C	4.04262	0.0115	0.0106236
AV44	sgRNA G14-R20	C	4.08076	0.0111	0.010254
AV44	sgRNA G14-R20	C	4.1189	0.0119	0.0109931
AV44	sgRNA G14-R20	C	4.15703	0.0122	0.0112702
AV44	sgRNA G14-R20	C	4.19517	0.0124	0.011455
AV44	sgRNA G14-R20	C	4.23331	0.0121	0.0111778
AV44	sgRNA G14-R20	C	4.27144	0.0123	0.0113626
AV44	sgRNA G14-R20	C	4.30958	0.0122	0.0112702
AV44	sgRNA G14-R20	C	4.34771	0.0129	0.0119169
AV44	sgRNA G14-R20	C	4.38586	0.0129	0.0119169
AV44	sgRNA G14-R20	C	4.42399	0.0129	0.0119169
AV44	sgRNA G14-R20	C	4.46213	0.0131	0.0121016
AV44	sgRNA G14-R20	C	4.50026	0.0134	0.0123788
AV44	sgRNA G14-R20	C	4.5384	0.0137	0.0126559
AV44	sgRNA G14-R20	C	4.57653	0.0136	0.0125635
AV44	sgRNA G14-R20	C	4.61467	0.014	0.012933
AV44	sgRNA G14-R20	C	4.6528	0.0137	0.0126559
AV44	sgRNA G14-R20	C	4.69094	0.0144	0.0133025
AV44	sgRNA G14-R20	C	4.72907	0.0146	0.0134873
AV44	sgRNA G14-R20	C	4.76721	0.0153	0.0141339
AV44	sgRNA G14-R20	C	4.80535	0.0153	0.0141339
AV44	sgRNA G14-R20	C	4.84348	0.0154	0.0142263
AV44	sgRNA G14-R20	C	4.88162	0.0156	0.0144111
AV44	sgRNA G14-R20	C	4.91976	0.017	0.0157044
AV44	sgRNA G14-R20	C	4.95789	0.0156	0.0144111
AV44	sgRNA G14-R20	C	4.99603	0.0163	0.0150577
AV44	sgRNA G14-R20	C	5.03417	0.0165	0.0152425
AV44	sgRNA G14-R20	C	5.0723	0.0164	0.0151501
AV44	sgRNA G14-R20	C	5.11044	0.0167	0.0154273
AV44	sgRNA G14-R20	C	5.14858	0.0176	0.0162587
AV44	sgRNA G14-R20	C	5.18671	0.0181	0.0167206
AV44	sgRNA G14-R20	C	5.22485	0.0185	0.0170901
AV44	sgRNA G14-R20	C	5.26298	0.0184	0.0169977
AV44	sgRNA G14-R20	C	5.30112	0.0186	0.0171824
AV44	sgRNA G14-R20	C	5.33925	0.0193	0.0178291
AV44	sgRNA G14-R20	C	5.37739	0.019	0.017552
AV44	sgRNA G14-R20	C	5.41553	0.019	0.017552
AV44	sgRNA G14-R20	C	5.45366	0.0198	0.018291
AV44	sgRNA G14-R20	C	5.4918	0.0203	0.0187529
AV44	sgRNA G14-R20	C	5.52994	0.0204	0.0188453
AV44	sgRNA G14-R20	C	5.56807	0.0208	0.0192148
AV44	sgRNA G14-R20	C	5.60621	0.0209	0.0193072
AV44	sgRNA G14-R20	C	5.64434	0.0215	0.0198614
AV44	sgRNA G14-R20	C	5.68248	0.0217	0.0200462
AV44	sgRNA G14-R20	C	5.72062	0.0219	0.0202309
AV44	sgRNA G14-R20	C	5.75875	0.0214	0.0197691
AV44	sgRNA G14-R20	C	5.79689	0.0225	0.0207852
AV44	sgRNA G14-R20	C	5.95028	0.0215	0.0198614
AV44	sgRNA G14-R20	C	5.98735	0.0235	0.021709
AV44	sgRNA G14-R20	C	6.02442	0.0239	0.0220785
AV44	sgRNA G14-R20	C	6.06148	0.0223	0.0206005
AV44	sgRNA G14-R20	C	6.09855	0.0229	0.0211547
AV44	sgRNA G14-R20	C	6.13562	0.0217	0.0200462
AV44	sgRNA G14-R20	C	6.17269	0.0234	0.0216166
AV44	sgRNA G14-R20	C	6.20975	0.0222	0.0205081
AV44	sgRNA G14-R20	C	6.24682	0.022	0.0203233
AV44	sgRNA G14-R20	C	6.28389	0.0231	0.0213395
AV44	sgRNA G14-R20	C	6.32096	0.0233	0.0215242
AV44	sgRNA G14-R20	C	6.35803	0.021	0.0193995
AV44	sgRNA G14-R20	C	6.3951	0.0224	0.0206928
AV44	sgRNA G14-R20	C	6.43216	0.0232	0.0214319
AV44	sgRNA G14-R20	C	6.46924	0.0232	0.0214319
AV44	sgRNA G14-R20	C	6.50631	0.0232	0.0214319
AV44	sgRNA G14-R20	C	6.54338	0.0246	0.0227252
AV44	sgRNA G14-R20	C	6.58044	0.0248	0.0229099
AV44	sgRNA G14-R20	C	6.61752	0.0234	0.0216166
AV44	sgRNA G14-R20	C	6.65459	0.0246	0.0227252
AV44	sgRNA G14-R20	C	6.69166	0.0246	0.0227252
AV44	sgRNA G14-R20	C	6.72872	0.0249	0.0230023
AV44	sgRNA G14-R20	C	6.76579	0.0247	0.0228176
AV44	sgRNA G14-R20	C	6.80286	0.0255	0.0235566
AV44	sgRNA G14-R20	C	6.83993	0.0257	0.0237413
AV44	sgRNA G14-R20	C	6.877	0.025	0.0230947
AV44	sgRNA G14-R20	C	6.91407	0.0256	0.023649
AV44	sgRNA G14-R20	C	6.95113	0.027	0.0249423
AV44	sgRNA G14-R20	C	6.9882	0.0261	0.0241109
AV44	sgRNA G14-R20	C	7.02527	0.0252	0.0232794
AV44	sgRNA G14-R20	C	7.06234	0.0249	0.0230023
AV44	sgRNA G14-R20	C	7.13648	0.0253	0.0233718
AV44	sgRNA G14-R20	C	7.17355	0.0258	0.0238337
AV44	sgRNA G14-R20	C	7.21062	0.0271	0.0250346
AV44	sgRNA G14-R20	C	7.24769	0.0265	0.0244804
AV44	sgRNA G14-R20	C	7.28476	0.029	0.0267898
AV44	sgRNA G14-R20	C	7.32182	0.0274	0.0253118
AV44	sgRNA G14-R20	C	7.35889	0.0286	0.0264203
AV44	sgRNA G14-R20	C	7.39596	0.0302	0.0278984
AV44	sgRNA G14-R20	C	7.4701	0.0304	0.0280831
AV44	sgRNA G14-R20	C	7.50717	0.0299	0.0276212
AV44	sgRNA G14-R20	C	7.54424	0.0297	0.0274365
AV44	sgRNA G14-R20	C	7.58131	0.028	0.0258661
AV44	sgRNA G14-R20	C	7.61838	0.0308	0.0284527
AV44	sgRNA G14-R20	C	7.65545	0.0299	0.0276212
AV44	sgRNA G14-R20	C	7.69252	0.03	0.0277136
AV44	sgRNA G14-R20	C	7.72958	0.0307	0.0283603
AV44	sgRNA G14-R20	C	7.76665	0.0305	0.0281755
AV44	sgRNA G14-R20	C	7.80372	0.03	0.0277136
AV44	sgRNA G14-R20	C	7.84079	0.0317	0.0292841
AV44	sgRNA G14-R20	C	7.87786	0.0309	0.028545
AV44	sgRNA G14-R20	C	7.91492	0.0301	0.027806
AV44	sgRNA G14-R20	C	7.95199	0.0319	0.0294688
AV44	sgRNA G14-R20	C	7.98906	0.0322	0.029746
AV44	sgRNA G14-R20	C	8.02613	0.0332	0.0306697
AV44	sgRNA G14-R20	C	8.0632	0.0317	0.0292841
AV44	sgRNA G14-R20	C	8.10027	0.0333	0.0307621
AV44	sgRNA G14-R20	C	8.13734	0.0332	0.0306697
AV44	sgRNA G14-R20	C	8.17441	0.0329	0.0303926
AV44	sgRNA G14-R20	C	8.21148	0.0335	0.0309469
AV44	sgRNA G14-R20	C	8.24854	0.0336	0.0310393
AV44	sgRNA G14-R20	C	8.28561	0.0343	0.0316859
AV44	sgRNA G14-R20	C	8.32268	0.0349	0.0322402
AV44	sgRNA G14-R20	C	8.35975	0.0338	0.031224
AV44	sgRNA G14-R20	C	8.39681	0.0354	0.0327021
AV44	sgRNA G14-R20	C	8.43388	0.0353	0.0326097
AV44	sgRNA G14-R20	C	8.47095	0.0353	0.0326097
AV44	sgRNA G14-R20	C	8.50802	0.0359	0.033164
AV44	sgRNA G14-R20	C	8.54509	0.0365	0.0337182
AV44	sgRNA G14-R20	C	8.58215	0.0357	0.0329792
AV44	sgRNA G14-R20	C	8.61922	0.0369	0.0340878
AV44	sgRNA G14-R20	C	8.65629	0.0382	0.0352887
AV44	sgRNA G14-R20	C	8.69336	0.0376	0.0347344
AV44	sgRNA G14-R20	C	8.73043	0.0386	0.0356582
AV44	sgRNA G14-R20	C	8.7675	0.0402	0.0371363
AV44	sgRNA G14-R20	C	8.80457	0.0393	0.0363048
AV44	sgRNA G14-R20	C	8.84164	0.0399	0.0368591
AV44	sgRNA G14-R20	C	8.87871	0.0415	0.0383372
AV44	sgRNA G14-R20	C	8.91578	0.0413	0.0381524
AV44	sgRNA G14-R20	C	8.95285	0.0412	0.03806
AV44	sgRNA G14-R20	C	8.98991	0.0432	0.0399076
AV44	sgRNA G14-R20	C	9.02698	0.0414	0.0382448
AV44	sgRNA G14-R20	C	9.06405	0.0429	0.0396305
AV44	sgRNA G14-R20	C	9.10112	0.0433	0.04
AV44	sgRNA G14-R20	C	9.13819	0.0439	0.0405543
AV44	sgRNA G14-R20	C	9.17526	0.0439	0.0405543
AV44	sgRNA G14-R20	C	9.21233	0.0444	0.0410162
AV44	sgRNA G14-R20	C	9.2494	0.0448	0.0413857
AV44	sgRNA G14-R20	C	9.28647	0.0459	0.0424018
AV44	sgRNA G14-R20	C	9.32354	0.0463	0.0427714
AV44	sgRNA G14-R20	C	9.3606	0.0466	0.0430485
AV44	sgRNA G14-R20	C	9.39767	0.0469	0.0433256
AV44	sgRNA G14-R20	C	9.43474	0.0475	0.0438799
AV44	sgRNA G14-R20	C	9.47181	0.0472	0.0436028
AV44	sgRNA G14-R20	C	9.50888	0.0489	0.0451732
AV44	sgRNA G14-R20	C	9.54595	0.0476	0.0439723
AV44	sgRNA G14-R20	C	9.58302	0.0471	0.0435104
AV44	sgRNA G14-R20	C	9.62009	0.0491	0.045358
AV44	sgRNA G14-R20	C	9.65716	0.0484	0.0447113
AV44	sgRNA G14-R20	C	9.69423	0.0486	0.0448961
AV44	sgRNA G14-R20	C	9.7313	0.0484	0.0447113
AV44	sgRNA G14-R20	C	9.76836	0.0489	0.0451732
AV44	sgRNA G14-R20	C	9.80543	0.0479	0.0442494
AV44	sgRNA G14-R20	C	9.8425	0.0487	0.0449885
AV44	sgRNA G14-R20	C	9.87957	0.0503	0.0464665
AV44	sgRNA G14-R20	C	9.91664	0.0489	0.0451732
AV44	sgRNA G14-R20	C	9.95371	0.0496	0.0458199
AV44	sgRNA G14-R20	C	9.99077	0.05	0.0461894
AV93 (ΔmscLS)	sgRNA G14-R20	A	2.02136	0.004	0.00361991
AV93 (ΔmscLS)	sgRNA G14-R20	A	2.0595	0.0042	0.0038009
AV93 (ΔmscLS)	sgRNA G14-R20	A	2.09764	0.004	0.00361991
AV93 (ΔmscLS)	sgRNA G14-R20	A	2.13578	0.0028	0.00253394
AV93 (ΔmscLS)	sgRNA G14-R20	A	2.17391	0.0045	0.0040724
AV93 (ΔmscLS)	sgRNA G14-R20	A	2.21205	0.0045	0.0040724
AV93 (ΔmscLS)	sgRNA G14-R20	A	2.25019	0.0043	0.0038914
AV93 (ΔmscLS)	sgRNA G14-R20	A	2.28833	0.0041	0.00371041
AV93 (ΔmscLS)	sgRNA G14-R20	A	2.32646	0.0042	0.0038009
AV93 (ΔmscLS)	sgRNA G14-R20	A	2.3646	0.005	0.00452489
AV93 (ΔmscLS)	sgRNA G14-R20	A	2.40274	0.0049	0.00443439
AV93 (ΔmscLS)	sgRNA G14-R20	A	2.47901	0.0051	0.00461538
AV93 (ΔmscLS)	sgRNA G14-R20	A	2.51715	0.0052	0.00470588
AV93 (ΔmscLS)	sgRNA G14-R20	A	2.55528	0.0055	0.00497738
AV93 (ΔmscLS)	sgRNA G14-R20	A	2.59342	0.0057	0.00515837
AV93 (ΔmscLS)	sgRNA G14-R20	A	2.63155	0.0057	0.00515837
AV93 (ΔmscLS)	sgRNA G14-R20	A	2.66969	0.0057	0.00515837
AV93 (ΔmscLS)	sgRNA G14-R20	A	2.70783	0.0058	0.00524887
AV93 (ΔmscLS)	sgRNA G14-R20	A	2.74596	0.0052	0.00470588
AV93 (ΔmscLS)	sgRNA G14-R20	A	2.7841	0.0059	0.00533937
AV93 (ΔmscLS)	sgRNA G14-R20	A	2.82224	0.0063	0.00570136
AV93 (ΔmscLS)	sgRNA G14-R20	A	2.86037	0.0049	0.00443439
AV93 (ΔmscLS)	sgRNA G14-R20	A	2.93664	0.0064	0.00579186
AV93 (ΔmscLS)	sgRNA G14-R20	A	3.01291	0.0035	0.00316742
AV93 (ΔmscLS)	sgRNA G14-R20	A	3.12732	0.0067	0.00606335
AV93 (ΔmscLS)	sgRNA G14-R20	A	3.16546	0.0067	0.00606335
AV93 (ΔmscLS)	sgRNA G14-R20	A	3.2036	0.0067	0.00606335
AV93 (ΔmscLS)	sgRNA G14-R20	A	3.24174	0.0072	0.00651584
AV93 (ΔmscLS)	sgRNA G14-R20	A	3.27987	0.0079	0.00714932
AV93 (ΔmscLS)	sgRNA G14-R20	A	3.31801	0.0071	0.00642534
AV93 (ΔmscLS)	sgRNA G14-R20	A	3.35615	0.0076	0.00687783
AV93 (ΔmscLS)	sgRNA G14-R20	A	3.39429	0.0075	0.00678733
AV93 (ΔmscLS)	sgRNA G14-R20	A	3.43242	0.0077	0.00696833
AV93 (ΔmscLS)	sgRNA G14-R20	A	3.47056	0.0063	0.00570136
AV93 (ΔmscLS)	sgRNA G14-R20	A	3.5087	0.008	0.00723982
AV93 (ΔmscLS)	sgRNA G14-R20	A	3.54683	0.0054	0.00488688
AV93 (ΔmscLS)	sgRNA G14-R20	A	3.58497	0.0085	0.00769231
AV93 (ΔmscLS)	sgRNA G14-R20	A	3.62311	0.0084	0.00760181
AV93 (ΔmscLS)	sgRNA G14-R20	A	3.66125	0.0088	0.0079638
AV93 (ΔmscLS)	sgRNA G14-R20	A	3.73753	0.009	0.0081448
AV93 (ΔmscLS)	sgRNA G14-R20	A	3.77566	0.0091	0.00823529
AV93 (ΔmscLS)	sgRNA G14-R20	A	3.8138	0.0094	0.00850679
AV93 (ΔmscLS)	sgRNA G14-R20	A	3.85193	0.0092	0.00832579
AV93 (ΔmscLS)	sgRNA G14-R20	A	3.89007	0.0097	0.00877828
AV93 (ΔmscLS)	sgRNA G14-R20	A	3.96635	0.0094	0.00850679
AV93 (ΔmscLS)	sgRNA G14-R20	A	4.00448	0.0098	0.00886878
AV93 (ΔmscLS)	sgRNA G14-R20	A	4.04262	0.0099	0.00895928
AV93 (ΔmscLS)	sgRNA G14-R20	A	4.08076	0.0106	0.00959276
AV93 (ΔmscLS)	sgRNA G14-R20	A	4.15703	0.0106	0.00959276
AV93 (ΔmscLS)	sgRNA G14-R20	A	4.19517	0.0109	0.00986425
AV93 (ΔmscLS)	sgRNA G14-R20	A	4.23331	0.0114	0.0103167
AV93 (ΔmscLS)	sgRNA G14-R20	A	4.27144	0.0114	0.0103167
AV93 (ΔmscLS)	sgRNA G14-R20	A	4.30958	0.0115	0.0104072
AV93 (ΔmscLS)	sgRNA G14-R20	A	4.34771	0.0119	0.0107692
AV93 (ΔmscLS)	sgRNA G14-R20	A	4.42399	0.012	0.0108597
AV93 (ΔmscLS)	sgRNA G14-R20	A	4.46213	0.0123	0.0111312
AV93 (ΔmscLS)	sgRNA G14-R20	A	4.50026	0.0124	0.0112217
AV93 (ΔmscLS)	sgRNA G14-R20	A	4.5384	0.0127	0.0114932
AV93 (ΔmscLS)	sgRNA G14-R20	A	4.61467	0.0137	0.0123982
AV93 (ΔmscLS)	sgRNA G14-R20	A	4.6528	0.0137	0.0123982
AV93 (ΔmscLS)	sgRNA G14-R20	A	4.69094	0.0142	0.0128507
AV93 (ΔmscLS)	sgRNA G14-R20	A	4.72907	0.0125	0.0113122
AV93 (ΔmscLS)	sgRNA G14-R20	A	4.76721	0.0146	0.0132127
AV93 (ΔmscLS)	sgRNA G14-R20	A	4.80535	0.0148	0.0133937
AV93 (ΔmscLS)	sgRNA G14-R20	A	4.84348	0.0152	0.0137557
AV93 (ΔmscLS)	sgRNA G14-R20	A	4.91976	0.0155	0.0140271
AV93 (ΔmscLS)	sgRNA G14-R20	A	4.95789	0.0161	0.0145701
AV93 (ΔmscLS)	sgRNA G14-R20	A	4.99603	0.0161	0.0145701
AV93 (ΔmscLS)	sgRNA G14-R20	A	5.03417	0.0164	0.0148416
AV93 (ΔmscLS)	sgRNA G14-R20	A	5.0723	0.0169	0.0152941
AV93 (ΔmscLS)	sgRNA G14-R20	A	5.11044	0.0174	0.0157466
AV93 (ΔmscLS)	sgRNA G14-R20	A	5.14858	0.0172	0.0155656
AV93 (ΔmscLS)	sgRNA G14-R20	A	5.18671	0.0177	0.0160181
AV93 (ΔmscLS)	sgRNA G14-R20	A	5.22485	0.0179	0.0161991
AV93 (ΔmscLS)	sgRNA G14-R20	A	5.26298	0.0186	0.0168326
AV93 (ΔmscLS)	sgRNA G14-R20	A	5.30112	0.0186	0.0168326
AV93 (ΔmscLS)	sgRNA G14-R20	A	5.33925	0.0185	0.0167421
AV93 (ΔmscLS)	sgRNA G14-R20	A	5.37739	0.0192	0.0173756
AV93 (ΔmscLS)	sgRNA G14-R20	A	5.41553	0.0195	0.0176471
AV93 (ΔmscLS)	sgRNA G14-R20	A	5.45366	0.0197	0.0178281
AV93 (ΔmscLS)	sgRNA G14-R20	A	5.4918	0.02	0.0180995
AV93 (ΔmscLS)	sgRNA G14-R20	A	5.52994	0.0205	0.018552
AV93 (ΔmscLS)	sgRNA G14-R20	A	5.56807	0.0212	0.0191855
AV93 (ΔmscLS)	sgRNA G14-R20	A	5.60621	0.0209	0.018914
AV93 (ΔmscLS)	sgRNA G14-R20	A	5.64434	0.0215	0.019457
AV93 (ΔmscLS)	sgRNA G14-R20	A	5.68248	0.0223	0.020181
AV93 (ΔmscLS)	sgRNA G14-R20	A	5.72062	0.0225	0.020362
AV93 (ΔmscLS)	sgRNA G14-R20	A	5.98735	0.0121	0.0109502
AV93 (ΔmscLS)	sgRNA G14-R20	A	6.02442	0.0109	0.00986425
AV93 (ΔmscLS)	sgRNA G14-R20	A	6.06148	0.011	0.00995475
AV93 (ΔmscLS)	sgRNA G14-R20	A	6.09855	0.0104	0.00941176
AV93 (ΔmscLS)	sgRNA G14-R20	A	6.13562	0.0098	0.00886878
AV93 (ΔmscLS)	sgRNA G14-R20	A	6.17269	0.009	0.0081448
AV93 (ΔmscLS)	sgRNA G14-R20	A	6.20975	0.0108	0.00977376
AV93 (ΔmscLS)	sgRNA G14-R20	A	6.24682	0.0104	0.00941176
AV93 (ΔmscLS)	sgRNA G14-R20	A	6.28389	0.0097	0.00877828
AV93 (ΔmscLS)	sgRNA G14-R20	A	6.32096	0.0092	0.00832579
AV93 (ΔmscLS)	sgRNA G14-R20	A	6.35803	0.0067	0.00606335
AV93 (ΔmscLS)	sgRNA G14-R20	A	6.3951	0.008	0.00723982
AV93 (ΔmscLS)	sgRNA G14-R20	A	6.43216	0.0077	0.00696833
AV93 (ΔmscLS)	sgRNA G14-R20	A	6.46924	0.0063	0.00570136
AV93 (ΔmscLS)	sgRNA G14-R20	A	6.50631	0.0068	0.00615385
AV93 (ΔmscLS)	sgRNA G14-R20	A	6.58044	0.0051	0.00461538
AV93 (ΔmscLS)	sgRNA G14-R20	A	6.61752	0.0046	0.0041629
AV93 (ΔmscLS)	sgRNA G14-R20	A	6.65459	0.0056	0.00506787
AV93 (ΔmscLS)	sgRNA G14-R20	A	6.69166	0.004	0.00361991
AV93 (ΔmscLS)	sgRNA G14-R20	A	6.72872	0.0047	0.00425339
AV93 (ΔmscLS)	sgRNA G14-R20	A	6.76579	0.004	0.00361991
AV93 (ΔmscLS)	sgRNA G14-R20	A	6.80286	0.0046	0.0041629
AV93 (ΔmscLS)	sgRNA G14-R20	A	6.83993	0.0069	0.00624434
AV93 (ΔmscLS)	sgRNA G14-R20	A	6.877	0.0067	0.00606335
AV93 (ΔmscLS)	sgRNA G14-R20	A	6.91407	0.0053	0.00479638
AV93 (ΔmscLS)	sgRNA G14-R20	A	6.95113	0.0067	0.00606335
AV93 (ΔmscLS)	sgRNA G14-R20	A	6.9882	0.0076	0.00687783
AV93 (ΔmscLS)	sgRNA G14-R20	A	7.02527	0.0056	0.00506787
AV93 (ΔmscLS)	sgRNA G14-R20	A	7.06234	0.007	0.00633484
AV93 (ΔmscLS)	sgRNA G14-R20	A	7.09941	0.0071	0.00642534
AV93 (ΔmscLS)	sgRNA G14-R20	A	7.13648	0.0065	0.00588235
AV93 (ΔmscLS)	sgRNA G14-R20	A	7.17355	0.0074	0.00669683
AV93 (ΔmscLS)	sgRNA G14-R20	A	7.21062	0.0086	0.00778281
AV93 (ΔmscLS)	sgRNA G14-R20	A	7.24769	0.0075	0.00678733
AV93 (ΔmscLS)	sgRNA G14-R20	A	7.28476	0.0089	0.0080543
AV93 (ΔmscLS)	sgRNA G14-R20	A	7.32182	0.0079	0.00714932
AV93 (ΔmscLS)	sgRNA G14-R20	A	7.35889	0.0082	0.00742081
AV93 (ΔmscLS)	sgRNA G14-R20	A	7.39596	0.0098	0.00886878
AV93 (ΔmscLS)	sgRNA G14-R20	A	7.43303	0.0088	0.0079638
AV93 (ΔmscLS)	sgRNA G14-R20	A	7.4701	0.0096	0.00868778
AV93 (ΔmscLS)	sgRNA G14-R20	A	7.50717	0.0093	0.00841629
AV93 (ΔmscLS)	sgRNA G14-R20	A	7.54424	0.0101	0.00914027
AV93 (ΔmscLS)	sgRNA G14-R20	A	7.58131	0.0112	0.0101357
AV93 (ΔmscLS)	sgRNA G14-R20	A	7.61838	0.0099	0.00895928
AV93 (ΔmscLS)	sgRNA G14-R20	A	7.65545	0.011	0.00995475
AV93 (ΔmscLS)	sgRNA G14-R20	A	7.69252	0.0105	0.00950226
AV93 (ΔmscLS)	sgRNA G14-R20	A	7.72958	0.0113	0.0102262
AV93 (ΔmscLS)	sgRNA G14-R20	A	7.76665	0.0118	0.0106787
AV93 (ΔmscLS)	sgRNA G14-R20	A	7.80372	0.011	0.00995475
AV93 (ΔmscLS)	sgRNA G14-R20	A	7.84079	0.0116	0.0104977
AV93 (ΔmscLS)	sgRNA G14-R20	A	7.87786	0.0119	0.0107692
AV93 (ΔmscLS)	sgRNA G14-R20	A	7.91492	0.0131	0.0118552
AV93 (ΔmscLS)	sgRNA G14-R20	A	7.95199	0.0139	0.0125792
AV93 (ΔmscLS)	sgRNA G14-R20	A	8.02613	0.0135	0.0122172
AV93 (ΔmscLS)	sgRNA G14-R20	A	8.0632	0.0125	0.0113122
AV93 (ΔmscLS)	sgRNA G14-R20	A	8.10027	0.0138	0.0124887
AV93 (ΔmscLS)	sgRNA G14-R20	A	8.13734	0.0158	0.0142986
AV93 (ΔmscLS)	sgRNA G14-R20	A	8.17441	0.015	0.0135747
AV93 (ΔmscLS)	sgRNA G14-R20	A	8.21148	0.0144	0.0130317
AV93 (ΔmscLS)	sgRNA G14-R20	A	8.24854	0.0161	0.0145701
AV93 (ΔmscLS)	sgRNA G14-R20	A	8.28561	0.0169	0.0152941
AV93 (ΔmscLS)	sgRNA G14-R20	A	8.32268	0.017	0.0153846
AV93 (ΔmscLS)	sgRNA G14-R20	A	8.35975	0.0169	0.0152941
AV93 (ΔmscLS)	sgRNA G14-R20	A	8.39681	0.0192	0.0173756
AV93 (ΔmscLS)	sgRNA G14-R20	A	8.43388	0.0177	0.0160181
AV93 (ΔmscLS)	sgRNA G14-R20	A	8.47095	0.0176	0.0159276
AV93 (ΔmscLS)	sgRNA G14-R20	A	8.50802	0.0187	0.0169231
AV93 (ΔmscLS)	sgRNA G14-R20	A	8.54509	0.0213	0.019276
AV93 (ΔmscLS)	sgRNA G14-R20	A	8.58215	0.0199	0.018009
AV93 (ΔmscLS)	sgRNA G14-R20	A	8.61922	0.0198	0.0179186
AV93 (ΔmscLS)	sgRNA G14-R20	A	8.65629	0.0213	0.019276
AV93 (ΔmscLS)	sgRNA G14-R20	A	8.69336	0.0197	0.0178281
AV93 (ΔmscLS)	sgRNA G14-R20	A	8.73043	0.0211	0.019095
AV93 (ΔmscLS)	sgRNA G14-R20	A	8.7675	0.0203	0.018371
AV93 (ΔmscLS)	sgRNA G14-R20	A	8.80457	0.0229	0.020724
AV93 (ΔmscLS)	sgRNA G14-R20	A	8.84164	0.0229	0.020724
AV93 (ΔmscLS)	sgRNA G14-R20	A	8.87871	0.0233	0.021086
AV93 (ΔmscLS)	sgRNA G14-R20	A	8.91578	0.0245	0.0221719
AV93 (ΔmscLS)	sgRNA G14-R20	A	8.95285	0.0244	0.0220814
AV93 (ΔmscLS)	sgRNA G14-R20	A	8.98991	0.0243	0.021991
AV93 (ΔmscLS)	sgRNA G14-R20	A	9.02698	0.0249	0.0225339
AV93 (ΔmscLS)	sgRNA G14-R20	A	9.06405	0.0258	0.0233484
AV93 (ΔmscLS)	sgRNA G14-R20	A	9.10112	0.0256	0.0231674
AV93 (ΔmscLS)	sgRNA G14-R20	A	9.13819	0.0262	0.0237104
AV93 (ΔmscLS)	sgRNA G14-R20	A	9.17526	0.0266	0.0240724
AV93 (ΔmscLS)	sgRNA G14-R20	A	9.21233	0.0277	0.0250679
AV93 (ΔmscLS)	sgRNA G14-R20	A	9.2494	0.0279	0.0252489
AV93 (ΔmscLS)	sgRNA G14-R20	A	9.28647	0.0277	0.0250679
AV93 (ΔmscLS)	sgRNA G14-R20	A	9.32354	0.0303	0.0274208
AV93 (ΔmscLS)	sgRNA G14-R20	A	9.3606	0.0298	0.0269683
AV93 (ΔmscLS)	sgRNA G14-R20	A	9.39767	0.0303	0.0274208
AV93 (ΔmscLS)	sgRNA G14-R20	A	9.43474	0.0314	0.0284163
AV93 (ΔmscLS)	sgRNA G14-R20	A	9.50888	0.0324	0.0293213
AV93 (ΔmscLS)	sgRNA G14-R20	A	9.54595	0.0334	0.0302262
AV93 (ΔmscLS)	sgRNA G14-R20	A	9.58302	0.0329	0.0297738
AV93 (ΔmscLS)	sgRNA G14-R20	A	9.62009	0.035	0.0316742
AV93 (ΔmscLS)	sgRNA G14-R20	A	9.65716	0.0349	0.0315837
AV93 (ΔmscLS)	sgRNA G14-R20	A	9.69423	0.035	0.0316742
AV93 (ΔmscLS)	sgRNA G14-R20	A	9.76836	0.0358	0.0323982
AV93 (ΔmscLS)	sgRNA G14-R20	A	9.80543	0.0366	0.0331222
AV93 (ΔmscLS)	sgRNA G14-R20	A	9.8425	0.0378	0.0342081
AV93 (ΔmscLS)	sgRNA G14-R20	A	9.87957	0.0383	0.0346606
AV93 (ΔmscLS)	sgRNA G14-R20	A	9.91664	0.0409	0.0370136
AV93 (ΔmscLS)	sgRNA G14-R20	A	9.95371	0.0413	0.0373756
AV93 (ΔmscLS)	sgRNA G14-R20	A	9.99077	0.0409	0.0370136
AV93 (ΔmscLS)	sgRNA GØ-RØ	B	2.02136	0.0038	0.00163793
AV93 (ΔmscLS)	sgRNA GØ-RØ	B	2.0595	0.0043	0.00185345
AV93 (ΔmscLS)	sgRNA GØ-RØ	B	2.09764	0.0042	0.00181034
AV93 (ΔmscLS)	sgRNA GØ-RØ	B	2.13578	0.0043	0.00185345
AV93 (ΔmscLS)	sgRNA GØ-RØ	B	2.17391	0.0028	0.0012069
AV93 (ΔmscLS)	sgRNA GØ-RØ	B	2.40274	0.0056	0.00241379
AV93 (ΔmscLS)	sgRNA GØ-RØ	B	2.44087	0.0054	0.00232759
AV93 (ΔmscLS)	sgRNA GØ-RØ	B	2.47901	0.0058	0.0025
AV93 (ΔmscLS)	sgRNA GØ-RØ	B	2.51715	0.0062	0.00267241
AV93 (ΔmscLS)	sgRNA GØ-RØ	B	2.55528	0.0062	0.00267241
AV93 (ΔmscLS)	sgRNA GØ-RØ	B	2.59342	0.0062	0.00267241
AV93 (ΔmscLS)	sgRNA GØ-RØ	B	2.63155	0.0065	0.00280172
AV93 (ΔmscLS)	sgRNA GØ-RØ	B	2.66969	0.0068	0.00293103
AV93 (ΔmscLS)	sgRNA GØ-RØ	B	2.70783	0.007	0.00301724
AV93 (ΔmscLS)	sgRNA GØ-RØ	B	2.74596	0.0068	0.00293103
AV93 (ΔmscLS)	sgRNA GØ-RØ	B	2.7841	0.0075	0.00323276
AV93 (ΔmscLS)	sgRNA GØ-RØ	B	2.82224	0.0079	0.00340517
AV93 (ΔmscLS)	sgRNA GØ-RØ	B	2.86037	0.0078	0.00336207
AV93 (ΔmscLS)	sgRNA GØ-RØ	B	2.89851	0.0079	0.00340517
AV93 (ΔmscLS)	sgRNA GØ-RØ	B	2.93664	0.0086	0.0037069
AV93 (ΔmscLS)	sgRNA GØ-RØ	B	2.97478	0.0084	0.00362069
AV93 (ΔmscLS)	sgRNA GØ-RØ	B	3.01291	0.0083	0.00357759
AV93 (ΔmscLS)	sgRNA GØ-RØ	B	3.05105	0.0088	0.0037931
AV93 (ΔmscLS)	sgRNA GØ-RØ	B	3.08919	0.009	0.00387931
AV93 (ΔmscLS)	sgRNA GØ-RØ	B	3.12732	0.0091	0.00392241
AV93 (ΔmscLS)	sgRNA GØ-RØ	B	3.16546	0.0097	0.00418103
AV93 (ΔmscLS)	sgRNA GØ-RØ	B	3.2036	0.0098	0.00422414
AV93 (ΔmscLS)	sgRNA GØ-RØ	B	3.24174	0.01	0.00431034
AV93 (ΔmscLS)	sgRNA GØ-RØ	B	3.27987	0.0104	0.00448276
AV93 (ΔmscLS)	sgRNA GØ-RØ	B	3.31801	0.0109	0.00469828
AV93 (ΔmscLS)	sgRNA GØ-RØ	B	3.35615	0.0107	0.00461207
AV93 (ΔmscLS)	sgRNA GØ-RØ	B	3.39429	0.0106	0.00456897
AV93 (ΔmscLS)	sgRNA GØ-RØ	B	3.43242	0.0112	0.00482759
AV93 (ΔmscLS)	sgRNA GØ-RØ	B	3.47056	0.0118	0.00508621
AV93 (ΔmscLS)	sgRNA GØ-RØ	B	3.5087	0.0117	0.0050431
AV93 (ΔmscLS)	sgRNA GØ-RØ	B	3.54683	0.0122	0.00525862
AV93 (ΔmscLS)	sgRNA GØ-RØ	B	3.58497	0.0117	0.0050431
AV93 (ΔmscLS)	sgRNA GØ-RØ	B	3.62311	0.0126	0.00543103
AV93 (ΔmscLS)	sgRNA GØ-RØ	B	3.66125	0.0135	0.00581897
AV93 (ΔmscLS)	sgRNA GØ-RØ	B	3.69939	0.0137	0.00590517
AV93 (ΔmscLS)	sgRNA GØ-RØ	B	3.77566	0.0144	0.0062069
AV93 (ΔmscLS)	sgRNA GØ-RØ	B	3.8138	0.0149	0.00642241
AV93 (ΔmscLS)	sgRNA GØ-RØ	B	3.85193	0.0144	0.0062069
AV93 (ΔmscLS)	sgRNA GØ-RØ	B	3.89007	0.0149	0.00642241
AV93 (ΔmscLS)	sgRNA GØ-RØ	B	3.92821	0.0153	0.00659483
AV93 (ΔmscLS)	sgRNA GØ-RØ	B	3.96635	0.0163	0.00702586
AV93 (ΔmscLS)	sgRNA GØ-RØ	B	4.00448	0.0163	0.00702586
AV93 (ΔmscLS)	sgRNA GØ-RØ	B	4.04262	0.017	0.00732759
AV93 (ΔmscLS)	sgRNA GØ-RØ	B	4.08076	0.0176	0.00758621
AV93 (ΔmscLS)	sgRNA GØ-RØ	B	4.1189	0.0174	0.0075
AV93 (ΔmscLS)	sgRNA GØ-RØ	B	4.15703	0.0176	0.00758621
AV93 (ΔmscLS)	sgRNA GØ-RØ	B	4.19517	0.0189	0.00814655
AV93 (ΔmscLS)	sgRNA GØ-RØ	B	4.23331	0.0197	0.00849138
AV93 (ΔmscLS)	sgRNA GØ-RØ	B	4.27144	0.0199	0.00857759
AV93 (ΔmscLS)	sgRNA GØ-RØ	B	4.30958	0.0201	0.00866379
AV93 (ΔmscLS)	sgRNA GØ-RØ	B	4.34771	0.0203	0.00875
AV93 (ΔmscLS)	sgRNA GØ-RØ	B	4.38586	0.0211	0.00909483
AV93 (ΔmscLS)	sgRNA GØ-RØ	B	4.42399	0.0215	0.00926724
AV93 (ΔmscLS)	sgRNA GØ-RØ	B	4.46213	0.0218	0.00939655
AV93 (ΔmscLS)	sgRNA GØ-RØ	B	4.50026	0.0227	0.00978448
AV93 (ΔmscLS)	sgRNA GØ-RØ	B	4.5384	0.0234	0.0100862
AV93 (ΔmscLS)	sgRNA GØ-RØ	B	4.57653	0.0241	0.0103879
AV93 (ΔmscLS)	sgRNA GØ-RØ	B	4.61467	0.0252	0.0108621
AV93 (ΔmscLS)	sgRNA GØ-RØ	B	4.6528	0.0247	0.0106466
AV93 (ΔmscLS)	sgRNA GØ-RØ	B	4.69094	0.026	0.0112069
AV93 (ΔmscLS)	sgRNA GØ-RØ	B	4.72907	0.0267	0.0115086
AV93 (ΔmscLS)	sgRNA GØ-RØ	B	4.76721	0.0268	0.0115517
AV93 (ΔmscLS)	sgRNA GØ-RØ	B	4.80535	0.0275	0.0118534
AV93 (ΔmscLS)	sgRNA GØ-RØ	B	4.84348	0.0283	0.0121983
AV93 (ΔmscLS)	sgRNA GØ-RØ	B	4.88162	0.0281	0.0121121
AV93 (ΔmscLS)	sgRNA GØ-RØ	B	4.91976	0.0292	0.0125862
AV93 (ΔmscLS)	sgRNA GØ-RØ	B	4.95789	0.0304	0.0131034
AV93 (ΔmscLS)	sgRNA GØ-RØ	B	4.99603	0.0306	0.0131897
AV93 (ΔmscLS)	sgRNA GØ-RØ	B	5.03417	0.0304	0.0131034
AV93 (ΔmscLS)	sgRNA GØ-RØ	B	5.0723	0.0325	0.0140086
AV93 (ΔmscLS)	sgRNA GØ-RØ	B	5.11044	0.0331	0.0142672
AV93 (ΔmscLS)	sgRNA GØ-RØ	B	5.14858	0.0337	0.0145259
AV93 (ΔmscLS)	sgRNA GØ-RØ	B	5.18671	0.0346	0.0149138
AV93 (ΔmscLS)	sgRNA GØ-RØ	B	5.22485	0.0354	0.0152586
AV93 (ΔmscLS)	sgRNA GØ-RØ	B	5.26298	0.0365	0.0157328
AV93 (ΔmscLS)	sgRNA GØ-RØ	B	5.30112	0.0366	0.0157759
AV93 (ΔmscLS)	sgRNA GØ-RØ	B	5.33925	0.0375	0.0161638
AV93 (ΔmscLS)	sgRNA GØ-RØ	B	5.37739	0.0381	0.0164224
AV93 (ΔmscLS)	sgRNA GØ-RØ	B	5.41553	0.039	0.0168103
AV93 (ΔmscLS)	sgRNA GØ-RØ	B	5.45366	0.0403	0.0173707
AV93 (ΔmscLS)	sgRNA GØ-RØ	B	5.4918	0.0411	0.0177155
AV93 (ΔmscLS)	sgRNA GØ-RØ	B	5.52994	0.0418	0.0180172
AV93 (ΔmscLS)	sgRNA GØ-RØ	B	5.56807	0.0423	0.0182328
AV93 (ΔmscLS)	sgRNA GØ-RØ	B	5.60621	0.0442	0.0190517
AV93 (ΔmscLS)	sgRNA GØ-RØ	B	5.64434	0.0447	0.0192672
AV93 (ΔmscLS)	sgRNA GØ-RØ	B	5.68248	0.0457	0.0196983
AV93 (ΔmscLS)	sgRNA GØ-RØ	B	5.72062	0.0469	0.0202155
AV93 (ΔmscLS)	sgRNA GØ-RØ	B	5.75875	0.0479	0.0206466
AV93 (ΔmscLS)	sgRNA GØ-RØ	B	5.98735	0.0394	0.0169828
AV93 (ΔmscLS)	sgRNA GØ-RØ	B	6.02442	0.0399	0.0171983
AV93 (ΔmscLS)	sgRNA GØ-RØ	B	6.09855	0.0393	0.0169397
AV93 (ΔmscLS)	sgRNA GØ-RØ	B	6.13562	0.0403	0.0173707
AV93 (ΔmscLS)	sgRNA GØ-RØ	B	6.17269	0.0403	0.0173707
AV93 (ΔmscLS)	sgRNA GØ-RØ	B	6.20975	0.0425	0.018319
AV93 (ΔmscLS)	sgRNA GØ-RØ	B	6.24682	0.0434	0.0187069
AV93 (ΔmscLS)	sgRNA GØ-RØ	B	6.28389	0.0446	0.0192241
AV93 (ΔmscLS)	sgRNA GØ-RØ	B	6.32096	0.045	0.0193966
AV93 (ΔmscLS)	sgRNA GØ-RØ	B	6.35803	0.0457	0.0196983
AV93 (ΔmscLS)	sgRNA GØ-RØ	B	6.3951	0.0469	0.0202155
AV93 (ΔmscLS)	sgRNA GØ-RØ	B	6.43216	0.047	0.0202586
AV93 (ΔmscLS)	sgRNA GØ-RØ	B	6.46924	0.0482	0.0207759
AV93 (ΔmscLS)	sgRNA GØ-RØ	B	6.50631	0.0495	0.0213362
AV93 (ΔmscLS)	sgRNA GØ-RØ	B	6.54338	0.0508	0.0218966
AV93 (ΔmscLS)	sgRNA GØ-RØ	B	6.58044	0.0523	0.0225431
AV93 (ΔmscLS)	sgRNA GØ-RØ	B	6.65459	0.0537	0.0231466
AV93 (ΔmscLS)	sgRNA GØ-RØ	B	6.69166	0.0548	0.0236207
AV93 (ΔmscLS)	sgRNA GØ-RØ	B	6.72872	0.0552	0.0237931
AV93 (ΔmscLS)	sgRNA GØ-RØ	B	6.76579	0.0559	0.0240948
AV93 (ΔmscLS)	sgRNA GØ-RØ	B	6.80286	0.0554	0.0238793
AV93 (ΔmscLS)	sgRNA GØ-RØ	B	6.83993	0.0568	0.0244828
AV93 (ΔmscLS)	sgRNA GØ-RØ	B	6.877	0.056	0.0241379
AV93 (ΔmscLS)	sgRNA GØ-RØ	B	6.91407	0.0565	0.0243534
AV93 (ΔmscLS)	sgRNA GØ-RØ	B	6.95113	0.0576	0.0248276
AV93 (ΔmscLS)	sgRNA GØ-RØ	B	6.9882	0.0591	0.0254741
AV93 (ΔmscLS)	sgRNA GØ-RØ	B	7.02527	0.0587	0.0253017
AV93 (ΔmscLS)	sgRNA GØ-RØ	B	7.06234	0.0601	0.0259052
AV93 (ΔmscLS)	sgRNA GØ-RØ	B	7.09941	0.0611	0.0263362
AV93 (ΔmscLS)	sgRNA GØ-RØ	B	7.13648	0.0626	0.0269828
AV93 (ΔmscLS)	sgRNA GØ-RØ	B	7.21062	0.064	0.0275862
AV93 (ΔmscLS)	sgRNA GØ-RØ	B	7.24769	0.0647	0.0278879
AV93 (ΔmscLS)	sgRNA GØ-RØ	B	7.28476	0.0656	0.0282759
AV93 (ΔmscLS)	sgRNA GØ-RØ	B	7.35889	0.0658	0.0283621
AV93 (ΔmscLS)	sgRNA GØ-RØ	B	7.39596	0.0684	0.0294828
AV93 (ΔmscLS)	sgRNA GØ-RØ	B	7.43303	0.0683	0.0294397
AV93 (ΔmscLS)	sgRNA GØ-RØ	B	7.4701	0.0699	0.0301293
AV93 (ΔmscLS)	sgRNA GØ-RØ	B	7.50717	0.0707	0.0304741
AV93 (ΔmscLS)	sgRNA GØ-RØ	B	7.54424	0.0718	0.0309483
AV93 (ΔmscLS)	sgRNA GØ-RØ	B	7.58131	0.0731	0.0315086
AV93 (ΔmscLS)	sgRNA GØ-RØ	B	7.61838	0.0741	0.0319397
AV93 (ΔmscLS)	sgRNA GØ-RØ	B	7.65545	0.0751	0.0323707
AV93 (ΔmscLS)	sgRNA GØ-RØ	B	7.69252	0.0765	0.0329741
AV93 (ΔmscLS)	sgRNA GØ-RØ	B	7.72958	0.0757	0.0326293
AV93 (ΔmscLS)	sgRNA GØ-RØ	B	7.76665	0.0788	0.0339655
AV93 (ΔmscLS)	sgRNA GØ-RØ	B	7.80372	0.0798	0.0343966
AV93 (ΔmscLS)	sgRNA GØ-RØ	B	7.84079	0.0809	0.0348707
AV93 (ΔmscLS)	sgRNA GØ-RØ	B	7.87786	0.0814	0.0350862
AV93 (ΔmscLS)	sgRNA GØ-RØ	B	7.91492	0.0831	0.035819
AV93 (ΔmscLS)	sgRNA GØ-RØ	B	7.95199	0.0848	0.0365517
AV93 (ΔmscLS)	sgRNA GØ-RØ	B	7.98906	0.0848	0.0365517
AV93 (ΔmscLS)	sgRNA GØ-RØ	B	8.02613	0.0869	0.0374569
AV93 (ΔmscLS)	sgRNA GØ-RØ	B	8.0632	0.0873	0.0376293
AV93 (ΔmscLS)	sgRNA GØ-RØ	B	8.10027	0.0888	0.0382759
AV93 (ΔmscLS)	sgRNA GØ-RØ	B	8.17441	0.0909	0.039181
AV93 (ΔmscLS)	sgRNA GØ-RØ	B	8.21148	0.0918	0.039569
AV93 (ΔmscLS)	sgRNA GØ-RØ	B	8.24854	0.0941	0.0405603
AV93 (ΔmscLS)	sgRNA GØ-RØ	B	8.28561	0.0949	0.0409052
AV93 (ΔmscLS)	sgRNA GØ-RØ	B	8.32268	0.0944	0.0406897
AV93 (ΔmscLS)	sgRNA GØ-RØ	B	8.35975	0.0982	0.0423276
AV93 (ΔmscLS)	sgRNA GØ-RØ	B	8.39681	0.1001	0.0431466
AV93 (ΔmscLS)	sgRNA GØ-RØ	B	8.43388	0.1003	0.0432328
AV93 (ΔmscLS)	sgRNA GØ-RØ	B	8.47095	0.1022	0.0440517
AV93 (ΔmscLS)	sgRNA GØ-RØ	B	8.50802	0.1035	0.0446121
AV93 (ΔmscLS)	sgRNA GØ-RØ	B	8.54509	0.1049	0.0452155
AV93 (ΔmscLS)	sgRNA GØ-RØ	B	8.58215	0.1065	0.0459052
AV93 (ΔmscLS)	sgRNA GØ-RØ	B	8.61922	0.1079	0.0465086
AV93 (ΔmscLS)	sgRNA GØ-RØ	B	8.65629	0.1096	0.0472414
AV93 (ΔmscLS)	sgRNA GØ-RØ	B	8.69336	0.1107	0.0477155
AV93 (ΔmscLS)	sgRNA GØ-RØ	B	8.73043	0.11	0.0474138
AV93 (ΔmscLS)	sgRNA GØ-RØ	B	8.80457	0.1132	0.0487931
AV93 (ΔmscLS)	sgRNA GØ-RØ	B	8.84164	0.1154	0.0497414
AV93 (ΔmscLS)	sgRNA GØ-RØ	B	8.87871	0.1159	0.0499569
AV93 (ΔmscLS)	sgRNA GØ-RØ	B	8.91578	0.1182	0.0509483
AV93 (ΔmscLS)	sgRNA GØ-RØ	B	8.95285	0.1186	0.0511207
AV93 (ΔmscLS)	sgRNA GØ-RØ	B	8.98991	0.1203	0.0518534
AV93 (ΔmscLS)	sgRNA GØ-RØ	B	9.02698	0.121	0.0521552
AV93 (ΔmscLS)	sgRNA GØ-RØ	B	9.06405	0.1227	0.0528879
AV93 (ΔmscLS)	sgRNA GØ-RØ	B	9.10112	0.1244	0.0536207
AV93 (ΔmscLS)	sgRNA GØ-RØ	B	9.13819	0.1253	0.0540086
AV93 (ΔmscLS)	sgRNA GØ-RØ	B	9.17526	0.1266	0.054569
AV93 (ΔmscLS)	sgRNA GØ-RØ	B	9.21233	0.1285	0.0553879
AV93 (ΔmscLS)	sgRNA GØ-RØ	B	9.2494	0.129	0.0556034
AV93 (ΔmscLS)	sgRNA GØ-RØ	B	9.28647	0.1326	0.0571552
AV93 (ΔmscLS)	sgRNA GØ-RØ	B	9.32354	0.1349	0.0581466
AV93 (ΔmscLS)	sgRNA GØ-RØ	B	9.3606	0.1358	0.0585345
AV93 (ΔmscLS)	sgRNA GØ-RØ	B	9.39767	0.1378	0.0593966
AV93 (ΔmscLS)	sgRNA GØ-RØ	B	9.43474	0.1388	0.0598276
AV93 (ΔmscLS)	sgRNA GØ-RØ	B	9.47181	0.1414	0.0609483
AV93 (ΔmscLS)	sgRNA GØ-RØ	B	9.50888	0.1434	0.0618103
AV93 (ΔmscLS)	sgRNA GØ-RØ	B	9.54595	0.1462	0.0630172
AV93 (ΔmscLS)	sgRNA GØ-RØ	B	9.58302	0.1479	0.06375
AV93 (ΔmscLS)	sgRNA GØ-RØ	B	9.62009	0.152	0.0655172
AV93 (ΔmscLS)	sgRNA GØ-RØ	B	9.65716	0.1546	0.0666379
AV93 (ΔmscLS)	sgRNA GØ-RØ	B	9.69423	0.1552	0.0668966
AV93 (ΔmscLS)	sgRNA GØ-RØ	B	9.76836	0.1611	0.0694397
AV93 (ΔmscLS)	sgRNA GØ-RØ	B	9.80543	0.1619	0.0697845
AV93 (ΔmscLS)	sgRNA GØ-RØ	B	9.8425	0.1659	0.0715086
AV93 (ΔmscLS)	sgRNA GØ-RØ	B	9.87957	0.1678	0.0723276
AV93 (ΔmscLS)	sgRNA GØ-RØ	B	9.91664	0.1687	0.0727155
AV93 (ΔmscLS)	sgRNA GØ-RØ	B	9.95371	0.1697	0.0731466
AV93 (ΔmscLS)	sgRNA GØ-RØ	B	9.99077	0.1728	0.0744828
AV93 (ΔmscLS)	sgRNA G14-R20	B	2.02136	0.0068	0.00316893
AV93 (ΔmscLS)	sgRNA G14-R20	B	2.0595	0.0054	0.0025165
AV93 (ΔmscLS)	sgRNA G14-R20	B	2.09764	0.0079	0.00368155
AV93 (ΔmscLS)	sgRNA G14-R20	B	2.13578	0.0057	0.00265631
AV93 (ΔmscLS)	sgRNA G14-R20	B	2.17391	0.0085	0.00396117
AV93 (ΔmscLS)	sgRNA G14-R20	B	2.21205	0.0086	0.00400777
AV93 (ΔmscLS)	sgRNA G14-R20	B	2.25019	0.0089	0.00414757
AV93 (ΔmscLS)	sgRNA G14-R20	B	2.28833	0.0092	0.00428738
AV93 (ΔmscLS)	sgRNA G14-R20	B	2.32646	0.0093	0.00433398
AV93 (ΔmscLS)	sgRNA G14-R20	B	2.3646	0.0095	0.00442718
AV93 (ΔmscLS)	sgRNA G14-R20	B	2.40274	0.0102	0.0047534
AV93 (ΔmscLS)	sgRNA G14-R20	B	2.44087	0.0103	0.0048
AV93 (ΔmscLS)	sgRNA G14-R20	B	2.47901	0.0103	0.0048
AV93 (ΔmscLS)	sgRNA G14-R20	B	2.51715	0.0104	0.0048466
AV93 (ΔmscLS)	sgRNA G14-R20	B	2.55528	0.0107	0.00498641
AV93 (ΔmscLS)	sgRNA G14-R20	B	2.59342	0.0112	0.00521942
AV93 (ΔmscLS)	sgRNA G14-R20	B	2.63155	0.0113	0.00526602
AV93 (ΔmscLS)	sgRNA G14-R20	B	2.66969	0.0114	0.00531262
AV93 (ΔmscLS)	sgRNA G14-R20	B	2.70783	0.0118	0.00549903
AV93 (ΔmscLS)	sgRNA G14-R20	B	2.74596	0.0119	0.00554563
AV93 (ΔmscLS)	sgRNA G14-R20	B	2.7841	0.0122	0.00568544
AV93 (ΔmscLS)	sgRNA G14-R20	B	2.82224	0.0123	0.00573204
AV93 (ΔmscLS)	sgRNA G14-R20	B	2.86037	0.0126	0.00587184
AV93 (ΔmscLS)	sgRNA G14-R20	B	2.89851	0.0128	0.00596505
AV93 (ΔmscLS)	sgRNA G14-R20	B	2.93664	0.0134	0.00624466
AV93 (ΔmscLS)	sgRNA G14-R20	B	2.97478	0.0134	0.00624466
AV93 (ΔmscLS)	sgRNA G14-R20	B	3.05105	0.0139	0.00647767
AV93 (ΔmscLS)	sgRNA G14-R20	B	3.08919	0.0138	0.00643107
AV93 (ΔmscLS)	sgRNA G14-R20	B	3.12732	0.0142	0.00661748
AV93 (ΔmscLS)	sgRNA G14-R20	B	3.16546	0.014	0.00652427
AV93 (ΔmscLS)	sgRNA G14-R20	B	3.2036	0.0141	0.00657087
AV93 (ΔmscLS)	sgRNA G14-R20	B	3.24174	0.0148	0.00689709
AV93 (ΔmscLS)	sgRNA G14-R20	B	3.27987	0.0153	0.0071301
AV93 (ΔmscLS)	sgRNA G14-R20	B	3.31801	0.0154	0.0071767
AV93 (ΔmscLS)	sgRNA G14-R20	B	3.35615	0.0154	0.0071767
AV93 (ΔmscLS)	sgRNA G14-R20	B	3.39429	0.0157	0.0073165
AV93 (ΔmscLS)	sgRNA G14-R20	B	3.43242	0.016	0.00745631
AV93 (ΔmscLS)	sgRNA G14-R20	B	3.47056	0.0154	0.0071767
AV93 (ΔmscLS)	sgRNA G14-R20	B	3.5087	0.0156	0.0072699
AV93 (ΔmscLS)	sgRNA G14-R20	B	3.54683	0.0169	0.00787573
AV93 (ΔmscLS)	sgRNA G14-R20	B	3.58497	0.0166	0.00773592
AV93 (ΔmscLS)	sgRNA G14-R20	B	3.62311	0.0169	0.00787573
AV93 (ΔmscLS)	sgRNA G14-R20	B	3.66125	0.017	0.00792233
AV93 (ΔmscLS)	sgRNA G14-R20	B	3.69939	0.0175	0.00815534
AV93 (ΔmscLS)	sgRNA G14-R20	B	3.73753	0.018	0.00838835
AV93 (ΔmscLS)	sgRNA G14-R20	B	3.77566	0.017	0.00792233
AV93 (ΔmscLS)	sgRNA G14-R20	B	3.8138	0.0186	0.00866796
AV93 (ΔmscLS)	sgRNA G14-R20	B	3.85193	0.0183	0.00852816
AV93 (ΔmscLS)	sgRNA G14-R20	B	3.89007	0.0185	0.00862136
AV93 (ΔmscLS)	sgRNA G14-R20	B	3.92821	0.0192	0.00894757
AV93 (ΔmscLS)	sgRNA G14-R20	B	3.96635	0.0197	0.00918058
AV93 (ΔmscLS)	sgRNA G14-R20	B	4.00448	0.0197	0.00918058
AV93 (ΔmscLS)	sgRNA G14-R20	B	4.04262	0.0197	0.00918058
AV93 (ΔmscLS)	sgRNA G14-R20	B	4.08076	0.0201	0.00936699
AV93 (ΔmscLS)	sgRNA G14-R20	B	4.1189	0.0202	0.00941359
AV93 (ΔmscLS)	sgRNA G14-R20	B	4.15703	0.0207	0.0096466
AV93 (ΔmscLS)	sgRNA G14-R20	B	4.19517	0.021	0.00978641
AV93 (ΔmscLS)	sgRNA G14-R20	B	4.23331	0.0211	0.00983301
AV93 (ΔmscLS)	sgRNA G14-R20	B	4.27144	0.0215	0.0100194
AV93 (ΔmscLS)	sgRNA G14-R20	B	4.34771	0.0222	0.0103456
AV93 (ΔmscLS)	sgRNA G14-R20	B	4.38586	0.0227	0.0105786
AV93 (ΔmscLS)	sgRNA G14-R20	B	4.42399	0.0228	0.0106252
AV93 (ΔmscLS)	sgRNA G14-R20	B	4.46213	0.0229	0.0106718
AV93 (ΔmscLS)	sgRNA G14-R20	B	4.50026	0.0234	0.0109049
AV93 (ΔmscLS)	sgRNA G14-R20	B	4.5384	0.0238	0.0110913
AV93 (ΔmscLS)	sgRNA G14-R20	B	4.57653	0.0243	0.0113243
AV93 (ΔmscLS)	sgRNA G14-R20	B	4.61467	0.0256	0.0119301
AV93 (ΔmscLS)	sgRNA G14-R20	B	4.6528	0.0258	0.0120233
AV93 (ΔmscLS)	sgRNA G14-R20	B	4.69094	0.0261	0.0121631
AV93 (ΔmscLS)	sgRNA G14-R20	B	4.72907	0.0268	0.0124893
AV93 (ΔmscLS)	sgRNA G14-R20	B	4.76721	0.0275	0.0128155
AV93 (ΔmscLS)	sgRNA G14-R20	B	4.80535	0.0278	0.0129553
AV93 (ΔmscLS)	sgRNA G14-R20	B	4.84348	0.0283	0.0131883
AV93 (ΔmscLS)	sgRNA G14-R20	B	4.88162	0.0289	0.013468
AV93 (ΔmscLS)	sgRNA G14-R20	B	4.91976	0.0295	0.0137476
AV93 (ΔmscLS)	sgRNA G14-R20	B	4.95789	0.0304	0.014167
AV93 (ΔmscLS)	sgRNA G14-R20	B	4.99603	0.0305	0.0142136
AV93 (ΔmscLS)	sgRNA G14-R20	B	5.0723	0.0321	0.0149592
AV93 (ΔmscLS)	sgRNA G14-R20	B	5.11044	0.0329	0.015332
AV93 (ΔmscLS)	sgRNA G14-R20	B	5.14858	0.0331	0.0154252
AV93 (ΔmscLS)	sgRNA G14-R20	B	5.22485	0.0345	0.0160777
AV93 (ΔmscLS)	sgRNA G14-R20	B	5.26298	0.0355	0.0165437
AV93 (ΔmscLS)	sgRNA G14-R20	B	5.30112	0.0356	0.0165903
AV93 (ΔmscLS)	sgRNA G14-R20	B	5.33925	0.0363	0.0169165
AV93 (ΔmscLS)	sgRNA G14-R20	B	5.37739	0.0375	0.0174757
AV93 (ΔmscLS)	sgRNA G14-R20	B	5.45366	0.0386	0.0179883
AV93 (ΔmscLS)	sgRNA G14-R20	B	5.4918	0.0388	0.0180816
AV93 (ΔmscLS)	sgRNA G14-R20	B	5.52994	0.04	0.0186408
AV93 (ΔmscLS)	sgRNA G14-R20	B	5.56807	0.0408	0.0190136
AV93 (ΔmscLS)	sgRNA G14-R20	B	5.60621	0.0413	0.0192466
AV93 (ΔmscLS)	sgRNA G14-R20	B	5.64434	0.0417	0.019433
AV93 (ΔmscLS)	sgRNA G14-R20	B	5.68248	0.043	0.0200388
AV93 (ΔmscLS)	sgRNA G14-R20	B	5.72062	0.0434	0.0202252
AV93 (ΔmscLS)	sgRNA G14-R20	B	5.75875	0.0437	0.020365
AV93 (ΔmscLS)	sgRNA G14-R20	B	5.98735	0.0338	0.0157515
AV93 (ΔmscLS)	sgRNA G14-R20	B	6.02442	0.0331	0.0154252
AV93 (ΔmscLS)	sgRNA G14-R20	B	6.06148	0.0325	0.0151456
AV93 (ΔmscLS)	sgRNA G14-R20	B	6.09855	0.0325	0.0151456
AV93 (ΔmscLS)	sgRNA G14-R20	B	6.13562	0.0316	0.0147262
AV93 (ΔmscLS)	sgRNA G14-R20	B	6.17269	0.0312	0.0145398
AV93 (ΔmscLS)	sgRNA G14-R20	B	6.20975	0.032	0.0149126
AV93 (ΔmscLS)	sgRNA G14-R20	B	6.24682	0.0314	0.014633
AV93 (ΔmscLS)	sgRNA G14-R20	B	6.28389	0.0309	0.0144
AV93 (ΔmscLS)	sgRNA G14-R20	B	6.32096	0.0305	0.0142136
AV93 (ΔmscLS)	sgRNA G14-R20	B	6.35803	0.0303	0.0141204
AV93 (ΔmscLS)	sgRNA G14-R20	B	6.3951	0.0301	0.0140272
AV93 (ΔmscLS)	sgRNA G14-R20	B	6.43216	0.0299	0.013934
AV93 (ΔmscLS)	sgRNA G14-R20	B	6.46924	0.0295	0.0137476
AV93 (ΔmscLS)	sgRNA G14-R20	B	6.50631	0.0292	0.0136078
AV93 (ΔmscLS)	sgRNA G14-R20	B	6.54338	0.0298	0.0138874
AV93 (ΔmscLS)	sgRNA G14-R20	B	6.58044	0.0292	0.0136078
AV93 (ΔmscLS)	sgRNA G14-R20	B	6.61752	0.0285	0.0132816
AV93 (ΔmscLS)	sgRNA G14-R20	B	6.65459	0.0289	0.013468
AV93 (ΔmscLS)	sgRNA G14-R20	B	6.69166	0.0279	0.0130019
AV93 (ΔmscLS)	sgRNA G14-R20	B	6.72872	0.0283	0.0131883
AV93 (ΔmscLS)	sgRNA G14-R20	B	6.76579	0.0284	0.013235
AV93 (ΔmscLS)	sgRNA G14-R20	B	6.80286	0.0283	0.0131883
AV93 (ΔmscLS)	sgRNA G14-R20	B	6.83993	0.0281	0.0130951
AV93 (ΔmscLS)	sgRNA G14-R20	B	6.877	0.0278	0.0129553
AV93 (ΔmscLS)	sgRNA G14-R20	B	6.91407	0.0279	0.0130019
AV93 (ΔmscLS)	sgRNA G14-R20	B	6.95113	0.028	0.0130485
AV93 (ΔmscLS)	sgRNA G14-R20	B	6.9882	0.0284	0.013235
AV93 (ΔmscLS)	sgRNA G14-R20	B	7.02527	0.0279	0.0130019
AV93 (ΔmscLS)	sgRNA G14-R20	B	7.06234	0.0279	0.0130019
AV93 (ΔmscLS)	sgRNA G14-R20	B	7.09941	0.0284	0.013235
AV93 (ΔmscLS)	sgRNA G14-R20	B	7.13648	0.0288	0.0134214
AV93 (ΔmscLS)	sgRNA G14-R20	B	7.17355	0.0291	0.0135612
AV93 (ΔmscLS)	sgRNA G14-R20	B	7.21062	0.0293	0.0136544
AV93 (ΔmscLS)	sgRNA G14-R20	B	7.24769	0.0288	0.0134214
AV93 (ΔmscLS)	sgRNA G14-R20	B	7.28476	0.0295	0.0137476
AV93 (ΔmscLS)	sgRNA G14-R20	B	7.32182	0.0295	0.0137476
AV93 (ΔmscLS)	sgRNA G14-R20	B	7.35889	0.0299	0.013934
AV93 (ΔmscLS)	sgRNA G14-R20	B	7.39596	0.0307	0.0143068
AV93 (ΔmscLS)	sgRNA G14-R20	B	7.43303	0.0302	0.0140738
AV93 (ΔmscLS)	sgRNA G14-R20	B	7.4701	0.032	0.0149126
AV93 (ΔmscLS)	sgRNA G14-R20	B	7.50717	0.0313	0.0145864
AV93 (ΔmscLS)	sgRNA G14-R20	B	7.54424	0.0323	0.0150524
AV93 (ΔmscLS)	sgRNA G14-R20	B	7.58131	0.0329	0.015332
AV93 (ΔmscLS)	sgRNA G14-R20	B	7.61838	0.0324	0.015099
AV93 (ΔmscLS)	sgRNA G14-R20	B	7.65545	0.0331	0.0154252
AV93 (ΔmscLS)	sgRNA G14-R20	B	7.69252	0.0338	0.0157515
AV93 (ΔmscLS)	sgRNA G14-R20	B	7.72958	0.0341	0.0158913
AV93 (ΔmscLS)	sgRNA G14-R20	B	7.76665	0.035	0.0163107
AV93 (ΔmscLS)	sgRNA G14-R20	B	7.80372	0.035	0.0163107
AV93 (ΔmscLS)	sgRNA G14-R20	B	7.84079	0.0352	0.0164039
AV93 (ΔmscLS)	sgRNA G14-R20	B	7.87786	0.0357	0.0166369
AV93 (ΔmscLS)	sgRNA G14-R20	B	7.91492	0.0359	0.0167301
AV93 (ΔmscLS)	sgRNA G14-R20	B	7.95199	0.0368	0.0171495
AV93 (ΔmscLS)	sgRNA G14-R20	B	7.98906	0.036	0.0167767
AV93 (ΔmscLS)	sgRNA G14-R20	B	8.02613	0.0363	0.0169165
AV93 (ΔmscLS)	sgRNA G14-R20	B	8.0632	0.037	0.0172427
AV93 (ΔmscLS)	sgRNA G14-R20	B	8.10027	0.0374	0.0174291
AV93 (ΔmscLS)	sgRNA G14-R20	B	8.13734	0.0381	0.0177553
AV93 (ΔmscLS)	sgRNA G14-R20	B	8.17441	0.038	0.0177087
AV93 (ΔmscLS)	sgRNA G14-R20	B	8.21148	0.0386	0.0179883
AV93 (ΔmscLS)	sgRNA G14-R20	B	8.24854	0.039	0.0181748
AV93 (ΔmscLS)	sgRNA G14-R20	B	8.28561	0.0402	0.018734
AV93 (ΔmscLS)	sgRNA G14-R20	B	8.32268	0.0398	0.0185476
AV93 (ΔmscLS)	sgRNA G14-R20	B	8.35975	0.0404	0.0188272
AV93 (ΔmscLS)	sgRNA G14-R20	B	8.39681	0.0414	0.0192932
AV93 (ΔmscLS)	sgRNA G14-R20	B	8.43388	0.0416	0.0193864
AV93 (ΔmscLS)	sgRNA G14-R20	B	8.47095	0.0418	0.0194796
AV93 (ΔmscLS)	sgRNA G14-R20	B	8.50802	0.0418	0.0194796
AV93 (ΔmscLS)	sgRNA G14-R20	B	8.54509	0.0435	0.0202718
AV93 (ΔmscLS)	sgRNA G14-R20	B	8.58215	0.0432	0.020132
AV93 (ΔmscLS)	sgRNA G14-R20	B	8.61922	0.0431	0.0200854
AV93 (ΔmscLS)	sgRNA G14-R20	B	8.65629	0.0447	0.0208311
AV93 (ΔmscLS)	sgRNA G14-R20	B	8.69336	0.0448	0.0208777
AV93 (ΔmscLS)	sgRNA G14-R20	B	8.73043	0.0459	0.0213903
AV93 (ΔmscLS)	sgRNA G14-R20	B	8.7675	0.0455	0.0212039
AV93 (ΔmscLS)	sgRNA G14-R20	B	8.80457	0.0466	0.0217165
AV93 (ΔmscLS)	sgRNA G14-R20	B	8.84164	0.0473	0.0220427
AV93 (ΔmscLS)	sgRNA G14-R20	B	8.87871	0.0473	0.0220427
AV93 (ΔmscLS)	sgRNA G14-R20	B	8.91578	0.0497	0.0231612
AV93 (ΔmscLS)	sgRNA G14-R20	B	8.95285	0.0492	0.0229282
AV93 (ΔmscLS)	sgRNA G14-R20	B	8.98991	0.05	0.023301
AV93 (ΔmscLS)	sgRNA G14-R20	B	9.02698	0.0503	0.0234408
AV93 (ΔmscLS)	sgRNA G14-R20	B	9.06405	0.0512	0.0238602
AV93 (ΔmscLS)	sgRNA G14-R20	B	9.10112	0.0517	0.0240932
AV93 (ΔmscLS)	sgRNA G14-R20	B	9.13819	0.0529	0.0246524
AV93 (ΔmscLS)	sgRNA G14-R20	B	9.17526	0.0538	0.0250718
AV93 (ΔmscLS)	sgRNA G14-R20	B	9.21233	0.0552	0.0257243
AV93 (ΔmscLS)	sgRNA G14-R20	B	9.2494	0.0554	0.0258175
AV93 (ΔmscLS)	sgRNA G14-R20	B	9.28647	0.0557	0.0259573
AV93 (ΔmscLS)	sgRNA G14-R20	B	9.32354	0.0567	0.0264233
AV93 (ΔmscLS)	sgRNA G14-R20	B	9.3606	0.058	0.0270291
AV93 (ΔmscLS)	sgRNA G14-R20	B	9.39767	0.0587	0.0273553
AV93 (ΔmscLS)	sgRNA G14-R20	B	9.43474	0.0598	0.027868
AV93 (ΔmscLS)	sgRNA G14-R20	B	9.47181	0.0614	0.0286136
AV93 (ΔmscLS)	sgRNA G14-R20	B	9.50888	0.061	0.0284272
AV93 (ΔmscLS)	sgRNA G14-R20	B	9.54595	0.0627	0.0292194
AV93 (ΔmscLS)	sgRNA G14-R20	B	9.58302	0.0634	0.0295456
AV93 (ΔmscLS)	sgRNA G14-R20	B	9.62009	0.0654	0.0304777
AV93 (ΔmscLS)	sgRNA G14-R20	B	9.65716	0.0661	0.0308039
AV93 (ΔmscLS)	sgRNA G14-R20	B	9.69423	0.0664	0.0309437
AV93 (ΔmscLS)	sgRNA G14-R20	B	9.7313	0.0678	0.0315961
AV93 (ΔmscLS)	sgRNA G14-R20	B	9.76836	0.0686	0.0319689
AV93 (ΔmscLS)	sgRNA G14-R20	B	9.80543	0.0694	0.0323417
AV93 (ΔmscLS)	sgRNA G14-R20	B	9.8425	0.0707	0.0329476
AV93 (ΔmscLS)	sgRNA G14-R20	B	9.87957	0.0727	0.0338796
AV93 (ΔmscLS)	sgRNA G14-R20	B	9.91664	0.0727	0.0338796
AV93 (ΔmscLS)	sgRNA G14-R20	B	9.95371	0.0739	0.0344388
AV93 (ΔmscLS)	sgRNA G14-R20	B	9.99077	0.0743	0.0346252
AV93 (ΔmscLS)	sgRNA GØ-RØ	C	2.02136	0.0058	0.00237543
AV93 (ΔmscLS)	sgRNA GØ-RØ	C	2.0595	0.0058	0.00237543
AV93 (ΔmscLS)	sgRNA GØ-RØ	C	2.09764	0.0066	0.00270307
AV93 (ΔmscLS)	sgRNA GØ-RØ	C	2.13578	0.0056	0.00229352
AV93 (ΔmscLS)	sgRNA GØ-RØ	C	2.17391	0.0082	0.00335836
AV93 (ΔmscLS)	sgRNA GØ-RØ	C	2.21205	0.0068	0.00278498
AV93 (ΔmscLS)	sgRNA GØ-RØ	C	2.25019	0.0063	0.0025802
AV93 (ΔmscLS)	sgRNA GØ-RØ	C	2.28833	0.0068	0.00278498
AV93 (ΔmscLS)	sgRNA GØ-RØ	C	2.32646	0.0083	0.00339932
AV93 (ΔmscLS)	sgRNA GØ-RØ	C	2.3646	0.0076	0.00311263
AV93 (ΔmscLS)	sgRNA GØ-RØ	C	2.40274	0.0077	0.00315358
AV93 (ΔmscLS)	sgRNA GØ-RØ	C	2.44087	0.0075	0.00307167
AV93 (ΔmscLS)	sgRNA GØ-RØ	C	2.51715	0.0083	0.00339932
AV93 (ΔmscLS)	sgRNA GØ-RØ	C	2.55528	0.0085	0.00348123
AV93 (ΔmscLS)	sgRNA GØ-RØ	C	2.59342	0.0089	0.00364505
AV93 (ΔmscLS)	sgRNA GØ-RØ	C	2.63155	0.0089	0.00364505
AV93 (ΔmscLS)	sgRNA GØ-RØ	C	2.66969	0.0098	0.00401365
AV93 (ΔmscLS)	sgRNA GØ-RØ	C	2.70783	0.0092	0.00376792
AV93 (ΔmscLS)	sgRNA GØ-RØ	C	2.74596	0.0098	0.00401365
AV93 (ΔmscLS)	sgRNA GØ-RØ	C	2.7841	0.0098	0.00401365
AV93 (ΔmscLS)	sgRNA GØ-RØ	C	2.82224	0.0101	0.00413652
AV93 (ΔmscLS)	sgRNA GØ-RØ	C	2.86037	0.0115	0.0047099
AV93 (ΔmscLS)	sgRNA GØ-RØ	C	2.89851	0.0107	0.00438225
AV93 (ΔmscLS)	sgRNA GØ-RØ	C	2.93664	0.0108	0.00442321
AV93 (ΔmscLS)	sgRNA GØ-RØ	C	2.97478	0.011	0.00450512
AV93 (ΔmscLS)	sgRNA GØ-RØ	C	3.01291	0.0116	0.00475085
AV93 (ΔmscLS)	sgRNA GØ-RØ	C	3.05105	0.0131	0.00536519
AV93 (ΔmscLS)	sgRNA GØ-RØ	C	3.08919	0.0113	0.00462799
AV93 (ΔmscLS)	sgRNA GØ-RØ	C	3.12732	0.0118	0.00483276
AV93 (ΔmscLS)	sgRNA GØ-RØ	C	3.16546	0.0121	0.00495563
AV93 (ΔmscLS)	sgRNA GØ-RØ	C	3.2036	0.0124	0.0050785
AV93 (ΔmscLS)	sgRNA GØ-RØ	C	3.24174	0.0126	0.00516041
AV93 (ΔmscLS)	sgRNA GØ-RØ	C	3.27987	0.0131	0.00536519
AV93 (ΔmscLS)	sgRNA GØ-RØ	C	3.31801	0.0136	0.00556997
AV93 (ΔmscLS)	sgRNA GØ-RØ	C	3.35615	0.0137	0.00561092
AV93 (ΔmscLS)	sgRNA GØ-RØ	C	3.39429	0.0138	0.00565188
AV93 (ΔmscLS)	sgRNA GØ-RØ	C	3.43242	0.0141	0.00577474
AV93 (ΔmscLS)	sgRNA GØ-RØ	C	3.47056	0.0145	0.00593857
AV93 (ΔmscLS)	sgRNA GØ-RØ	C	3.5087	0.0147	0.00602048
AV93 (ΔmscLS)	sgRNA GØ-RØ	C	3.54683	0.0149	0.00610239
AV93 (ΔmscLS)	sgRNA GØ-RØ	C	3.58497	0.0171	0.00700341
AV93 (ΔmscLS)	sgRNA GØ-RØ	C	3.62311	0.0165	0.00675768
AV93 (ΔmscLS)	sgRNA GØ-RØ	C	3.66125	0.0161	0.00659386
AV93 (ΔmscLS)	sgRNA GØ-RØ	C	3.69939	0.0167	0.00683959
AV93 (ΔmscLS)	sgRNA GØ-RØ	C	3.73753	0.0172	0.00704437
AV93 (ΔmscLS)	sgRNA GØ-RØ	C	3.77566	0.0176	0.00720819
AV93 (ΔmscLS)	sgRNA GØ-RØ	C	3.8138	0.0182	0.00745392
AV93 (ΔmscLS)	sgRNA GØ-RØ	C	3.85193	0.0179	0.00733106
AV93 (ΔmscLS)	sgRNA GØ-RØ	C	3.89007	0.0183	0.00749488
AV93 (ΔmscLS)	sgRNA GØ-RØ	C	3.96635	0.019	0.00778157
AV93 (ΔmscLS)	sgRNA GØ-RØ	C	4.00448	0.0195	0.00798635
AV93 (ΔmscLS)	sgRNA GØ-RØ	C	4.04262	0.0198	0.00810922
AV93 (ΔmscLS)	sgRNA GØ-RØ	C	4.08076	0.0207	0.00847782
AV93 (ΔmscLS)	sgRNA GØ-RØ	C	4.1189	0.0209	0.00855973
AV93 (ΔmscLS)	sgRNA GØ-RØ	C	4.15703	0.0215	0.00880546
AV93 (ΔmscLS)	sgRNA GØ-RØ	C	4.19517	0.0218	0.00892833
AV93 (ΔmscLS)	sgRNA GØ-RØ	C	4.23331	0.0221	0.00905119
AV93 (ΔmscLS)	sgRNA GØ-RØ	C	4.27144	0.0228	0.00933788
AV93 (ΔmscLS)	sgRNA GØ-RØ	C	4.30958	0.0233	0.00954266
AV93 (ΔmscLS)	sgRNA GØ-RØ	C	4.34771	0.0248	0.010157
AV93 (ΔmscLS)	sgRNA GØ-RØ	C	4.38586	0.0229	0.00937884
AV93 (ΔmscLS)	sgRNA GØ-RØ	C	4.42399	0.0258	0.0105666
AV93 (ΔmscLS)	sgRNA GØ-RØ	C	4.46213	0.0251	0.0102799
AV93 (ΔmscLS)	sgRNA GØ-RØ	C	4.50026	0.0259	0.0106075
AV93 (ΔmscLS)	sgRNA GØ-RØ	C	4.5384	0.0268	0.0109761
AV93 (ΔmscLS)	sgRNA GØ-RØ	C	4.57653	0.0268	0.0109761
AV93 (ΔmscLS)	sgRNA GØ-RØ	C	4.61467	0.0259	0.0106075
AV93 (ΔmscLS)	sgRNA GØ-RØ	C	4.6528	0.0285	0.0116724
AV93 (ΔmscLS)	sgRNA GØ-RØ	C	4.69094	0.0288	0.0117952
AV93 (ΔmscLS)	sgRNA GØ-RØ	C	4.72907	0.03	0.0122867
AV93 (ΔmscLS)	sgRNA GØ-RØ	C	4.76721	0.0317	0.0129829
AV93 (ΔmscLS)	sgRNA GØ-RØ	C	4.80535	0.0306	0.0125324
AV93 (ΔmscLS)	sgRNA GØ-RØ	C	4.84348	0.0314	0.0128601
AV93 (ΔmscLS)	sgRNA GØ-RØ	C	4.88162	0.0314	0.0128601
AV93 (ΔmscLS)	sgRNA GØ-RØ	C	4.91976	0.0324	0.0132696
AV93 (ΔmscLS)	sgRNA GØ-RØ	C	4.95789	0.0333	0.0136382
AV93 (ΔmscLS)	sgRNA GØ-RØ	C	4.99603	0.0346	0.0141706
AV93 (ΔmscLS)	sgRNA GØ-RØ	C	5.03417	0.0338	0.013843
AV93 (ΔmscLS)	sgRNA GØ-RØ	C	5.0723	0.0352	0.0144164
AV93 (ΔmscLS)	sgRNA GØ-RØ	C	5.11044	0.036	0.014744
AV93 (ΔmscLS)	sgRNA GØ-RØ	C	5.14858	0.0365	0.0149488
AV93 (ΔmscLS)	sgRNA GØ-RØ	C	5.18671	0.0376	0.0153993
AV93 (ΔmscLS)	sgRNA GØ-RØ	C	5.22485	0.0378	0.0154812
AV93 (ΔmscLS)	sgRNA GØ-RØ	C	5.26298	0.0389	0.0159317
AV93 (ΔmscLS)	sgRNA GØ-RØ	C	5.30112	0.0395	0.0161775
AV93 (ΔmscLS)	sgRNA GØ-RØ	C	5.33925	0.0416	0.0170375
AV93 (ΔmscLS)	sgRNA GØ-RØ	C	5.37739	0.0433	0.0177338
AV93 (ΔmscLS)	sgRNA GØ-RØ	C	5.56807	0.0456	0.0186758
AV93 (ΔmscLS)	sgRNA GØ-RØ	C	5.60621	0.0467	0.0191263
AV93 (ΔmscLS)	sgRNA GØ-RØ	C	5.64434	0.0473	0.019372
AV93 (ΔmscLS)	sgRNA GØ-RØ	C	5.68248	0.0485	0.0198635
AV93 (ΔmscLS)	sgRNA GØ-RØ	C	5.72062	0.0495	0.020273
AV93 (ΔmscLS)	sgRNA GØ-RØ	C	5.98735	0.0455	0.0186348
AV93 (ΔmscLS)	sgRNA GØ-RØ	C	6.02442	0.0447	0.0183072
AV93 (ΔmscLS)	sgRNA GØ-RØ	C	6.06148	0.0449	0.0183891
AV93 (ΔmscLS)	sgRNA GØ-RØ	C	6.09855	0.0457	0.0187167
AV93 (ΔmscLS)	sgRNA GØ-RØ	C	6.13562	0.0457	0.0187167
AV93 (ΔmscLS)	sgRNA GØ-RØ	C	6.17269	0.0459	0.0187986
AV93 (ΔmscLS)	sgRNA GØ-RØ	C	6.20975	0.0466	0.0190853
AV93 (ΔmscLS)	sgRNA GØ-RØ	C	6.24682	0.0481	0.0196997
AV93 (ΔmscLS)	sgRNA GØ-RØ	C	6.28389	0.0488	0.0199863
AV93 (ΔmscLS)	sgRNA GØ-RØ	C	6.32096	0.0495	0.020273
AV93 (ΔmscLS)	sgRNA GØ-RØ	C	6.35803	0.0503	0.0206007
AV93 (ΔmscLS)	sgRNA GØ-RØ	C	6.3951	0.0511	0.0209283
AV93 (ΔmscLS)	sgRNA GØ-RØ	C	6.43216	0.0515	0.0210922
AV93 (ΔmscLS)	sgRNA GØ-RØ	C	6.46924	0.0533	0.0218294
AV93 (ΔmscLS)	sgRNA GØ-RØ	C	6.50631	0.0543	0.0222389
AV93 (ΔmscLS)	sgRNA GØ-RØ	C	6.54338	0.0563	0.023058
AV93 (ΔmscLS)	sgRNA GØ-RØ	C	6.58044	0.0563	0.023058
AV93 (ΔmscLS)	sgRNA GØ-RØ	C	6.61752	0.0577	0.0236314
AV93 (ΔmscLS)	sgRNA GØ-RØ	C	6.65459	0.0584	0.0239181
AV93 (ΔmscLS)	sgRNA GØ-RØ	C	6.69166	0.0584	0.0239181
AV93 (ΔmscLS)	sgRNA GØ-RØ	C	6.72872	0.0581	0.0237952
AV93 (ΔmscLS)	sgRNA GØ-RØ	C	6.76579	0.0588	0.0240819
AV93 (ΔmscLS)	sgRNA GØ-RØ	C	6.80286	0.0591	0.0242048
AV93 (ΔmscLS)	sgRNA GØ-RØ	C	6.83993	0.0594	0.0243276
AV93 (ΔmscLS)	sgRNA GØ-RØ	C	6.877	0.0596	0.0244096
AV93 (ΔmscLS)	sgRNA GØ-RØ	C	6.91407	0.0598	0.0244915
AV93 (ΔmscLS)	sgRNA GØ-RØ	C	6.95113	0.0608	0.024901
AV93 (ΔmscLS)	sgRNA GØ-RØ	C	6.9882	0.062	0.0253925
AV93 (ΔmscLS)	sgRNA GØ-RØ	C	7.02527	0.0625	0.0255973
AV93 (ΔmscLS)	sgRNA GØ-RØ	C	7.06234	0.0633	0.0259249
AV93 (ΔmscLS)	sgRNA GØ-RØ	C	7.09941	0.0639	0.0261706
AV93 (ΔmscLS)	sgRNA GØ-RØ	C	7.13648	0.0649	0.0265802
AV93 (ΔmscLS)	sgRNA GØ-RØ	C	7.17355	0.0659	0.0269898
AV93 (ΔmscLS)	sgRNA GØ-RØ	C	7.21062	0.0669	0.0273993
AV93 (ΔmscLS)	sgRNA GØ-RØ	C	7.24769	0.0671	0.0274812
AV93 (ΔmscLS)	sgRNA GØ-RØ	C	7.28476	0.0679	0.0278089
AV93 (ΔmscLS)	sgRNA GØ-RØ	C	7.32182	0.0688	0.0281775
AV93 (ΔmscLS)	sgRNA GØ-RØ	C	7.35889	0.0701	0.0287099
AV93 (ΔmscLS)	sgRNA GØ-RØ	C	7.39596	0.0709	0.0290375
AV93 (ΔmscLS)	sgRNA GØ-RØ	C	7.43303	0.071	0.0290785
AV93 (ΔmscLS)	sgRNA GØ-RØ	C	7.4701	0.0725	0.0296928
AV93 (ΔmscLS)	sgRNA GØ-RØ	C	7.50717	0.0727	0.0297747
AV93 (ΔmscLS)	sgRNA GØ-RØ	C	7.54424	0.0744	0.030471
AV93 (ΔmscLS)	sgRNA GØ-RØ	C	7.58131	0.0752	0.0307986
AV93 (ΔmscLS)	sgRNA GØ-RØ	C	7.61838	0.0758	0.0310444
AV93 (ΔmscLS)	sgRNA GØ-RØ	C	7.65545	0.0775	0.0317406
AV93 (ΔmscLS)	sgRNA GØ-RØ	C	7.69252	0.0784	0.0321092
AV93 (ΔmscLS)	sgRNA GØ-RØ	C	7.72958	0.0799	0.0327235
AV93 (ΔmscLS)	sgRNA GØ-RØ	C	7.76665	0.0811	0.033215
AV93 (ΔmscLS)	sgRNA GØ-RØ	C	7.80372	0.082	0.0335836
AV93 (ΔmscLS)	sgRNA GØ-RØ	C	7.84079	0.0823	0.0337065
AV93 (ΔmscLS)	sgRNA GØ-RØ	C	7.87786	0.0836	0.0342389
AV93 (ΔmscLS)	sgRNA GØ-RØ	C	7.91492	0.085	0.0348123
AV93 (ΔmscLS)	sgRNA GØ-RØ	C	7.95199	0.0863	0.0353447
AV93 (ΔmscLS)	sgRNA GØ-RØ	C	7.98906	0.0867	0.0355085
AV93 (ΔmscLS)	sgRNA GØ-RØ	C	8.02613	0.0875	0.0358362
AV93 (ΔmscLS)	sgRNA GØ-RØ	C	8.0632	0.0892	0.0365324
AV93 (ΔmscLS)	sgRNA GØ-RØ	C	8.10027	0.0907	0.0371468
AV93 (ΔmscLS)	sgRNA GØ-RØ	C	8.13734	0.0924	0.037843
AV93 (ΔmscLS)	sgRNA GØ-RØ	C	8.17441	0.0931	0.0381297
AV93 (ΔmscLS)	sgRNA GØ-RØ	C	8.21148	0.0951	0.0389488
AV93 (ΔmscLS)	sgRNA GØ-RØ	C	8.24854	0.0966	0.0395631
AV93 (ΔmscLS)	sgRNA GØ-RØ	C	8.28561	0.0966	0.0395631
AV93 (ΔmscLS)	sgRNA GØ-RØ	C	8.32268	0.0981	0.0401775
AV93 (ΔmscLS)	sgRNA GØ-RØ	C	8.35975	0.0994	0.0407099
AV93 (ΔmscLS)	sgRNA GØ-RØ	C	8.39681	0.1011	0.0414061
AV93 (ΔmscLS)	sgRNA GØ-RØ	C	8.43388	0.1022	0.0418567
AV93 (ΔmscLS)	sgRNA GØ-RØ	C	8.47095	0.1042	0.0426758
AV93 (ΔmscLS)	sgRNA GØ-RØ	C	8.50802	0.1053	0.0431263
AV93 (ΔmscLS)	sgRNA GØ-RØ	C	8.54509	0.1063	0.0435358
AV93 (ΔmscLS)	sgRNA GØ-RØ	C	8.58215	0.1079	0.0441911
AV93 (ΔmscLS)	sgRNA GØ-RØ	C	8.61922	0.1088	0.0445597
AV93 (ΔmscLS)	sgRNA GØ-RØ	C	8.65629	0.1095	0.0448464
AV93 (ΔmscLS)	sgRNA GØ-RØ	C	8.69336	0.1108	0.0453788
AV93 (ΔmscLS)	sgRNA GØ-RØ	C	8.73043	0.1124	0.0460341
AV93 (ΔmscLS)	sgRNA GØ-RØ	C	8.7675	0.1128	0.046198
AV93 (ΔmscLS)	sgRNA GØ-RØ	C	8.80457	0.1147	0.0469761
AV93 (ΔmscLS)	sgRNA GØ-RØ	C	8.84164	0.1157	0.0473857
AV93 (ΔmscLS)	sgRNA GØ-RØ	C	8.87871	0.1168	0.0478362
AV93 (ΔmscLS)	sgRNA GØ-RØ	C	8.91578	0.1189	0.0486962
AV93 (ΔmscLS)	sgRNA GØ-RØ	C	8.95285	0.12	0.0491468
AV93 (ΔmscLS)	sgRNA GØ-RØ	C	8.98991	0.1201	0.0491877
AV93 (ΔmscLS)	sgRNA GØ-RØ	C	9.02698	0.123	0.0503754
AV93 (ΔmscLS)	sgRNA GØ-RØ	C	9.06405	0.1239	0.050744
AV93 (ΔmscLS)	sgRNA GØ-RØ	C	9.10112	0.1266	0.0518498
AV93 (ΔmscLS)	sgRNA GØ-RØ	C	9.13819	0.1281	0.0524642
AV93 (ΔmscLS)	sgRNA GØ-RØ	C	9.17526	0.1304	0.0534061
AV93 (ΔmscLS)	sgRNA GØ-RØ	C	9.21233	0.1317	0.0539386
AV93 (ΔmscLS)	sgRNA GØ-RØ	C	9.2494	0.1333	0.0545939
AV93 (ΔmscLS)	sgRNA GØ-RØ	C	9.28647	0.1354	0.0554539
AV93 (ΔmscLS)	sgRNA GØ-RØ	C	9.32354	0.1378	0.0564369
AV93 (ΔmscLS)	sgRNA GØ-RØ	C	9.3606	0.1386	0.0567645
AV93 (ΔmscLS)	sgRNA GØ-RØ	C	9.39767	0.1416	0.0579932
AV93 (ΔmscLS)	sgRNA GØ-RØ	C	9.43474	0.1445	0.0591809
AV93 (ΔmscLS)	sgRNA GØ-RØ	C	9.47181	0.1462	0.0598771
AV93 (ΔmscLS)	sgRNA GØ-RØ	C	9.50888	0.1482	0.0606962
AV93 (ΔmscLS)	sgRNA GØ-RØ	C	9.54595	0.1506	0.0616792
AV93 (ΔmscLS)	sgRNA GØ-RØ	C	9.58302	0.1516	0.0620887
AV93 (ΔmscLS)	sgRNA GØ-RØ	C	9.62009	0.1561	0.0639317
AV93 (ΔmscLS)	sgRNA GØ-RØ	C	9.65716	0.1571	0.0643413
AV93 (ΔmscLS)	sgRNA GØ-RØ	C	9.69423	0.1586	0.0649556
AV93 (ΔmscLS)	sgRNA GØ-RØ	C	9.7313	0.1619	0.0663072
AV93 (ΔmscLS)	sgRNA GØ-RØ	C	9.76836	0.164	0.0671672
AV93 (ΔmscLS)	sgRNA GØ-RØ	C	9.80543	0.1665	0.0681911
AV93 (ΔmscLS)	sgRNA GØ-RØ	C	9.8425	0.169	0.069215
AV93 (ΔmscLS)	sgRNA GØ-RØ	C	9.87957	0.1716	0.0702799
AV93 (ΔmscLS)	sgRNA GØ-RØ	C	9.91664	0.1736	0.071099
AV93 (ΔmscLS)	sgRNA GØ-RØ	C	9.95371	0.1766	0.0723276
AV93 (ΔmscLS)	sgRNA GØ-RØ	C	9.99077	0.1789	0.0732696
AV93 (ΔmscLS)	sgRNA G14-R20	C	5.98735	0.0205	0.0145218
AV93 (ΔmscLS)	sgRNA G14-R20	C	6.02442	0.0196	0.0138843
AV93 (ΔmscLS)	sgRNA G14-R20	C	6.06148	0.0202	0.0143093
AV93 (ΔmscLS)	sgRNA G14-R20	C	6.09855	0.0198	0.014026
AV93 (ΔmscLS)	sgRNA G14-R20	C	6.13562	0.02	0.0141677
AV93 (ΔmscLS)	sgRNA G14-R20	C	6.17269	0.0194	0.0137426
AV93 (ΔmscLS)	sgRNA G14-R20	C	6.20975	0.0199	0.0140968
AV93 (ΔmscLS)	sgRNA G14-R20	C	6.24682	0.0169	0.0119717
AV93 (ΔmscLS)	sgRNA G14-R20	C	6.28389	0.0196	0.0138843
AV93 (ΔmscLS)	sgRNA G14-R20	C	6.32096	0.0169	0.0119717
AV93 (ΔmscLS)	sgRNA G14-R20	C	6.35803	0.0159	0.0112633
AV93 (ΔmscLS)	sgRNA G14-R20	C	6.3951	0.0165	0.0116883
AV93 (ΔmscLS)	sgRNA G14-R20	C	6.43216	0.0182	0.0128926
AV93 (ΔmscLS)	sgRNA G14-R20	C	6.46924	0.0178	0.0126092
AV93 (ΔmscLS)	sgRNA G14-R20	C	6.50631	0.0169	0.0119717
AV93 (ΔmscLS)	sgRNA G14-R20	C	6.54338	0.0192	0.0136009
AV93 (ΔmscLS)	sgRNA G14-R20	C	6.58044	0.0177	0.0125384
AV93 (ΔmscLS)	sgRNA G14-R20	C	6.61752	0.0188	0.0133176
AV93 (ΔmscLS)	sgRNA G14-R20	C	6.65459	0.0153	0.0108383
AV93 (ΔmscLS)	sgRNA G14-R20	C	6.69166	0.0165	0.0116883
AV93 (ΔmscLS)	sgRNA G14-R20	C	6.72872	0.0165	0.0116883
AV93 (ΔmscLS)	sgRNA G14-R20	C	6.76579	0.0167	0.01183
AV93 (ΔmscLS)	sgRNA G14-R20	C	6.80286	0.0155	0.0109799
AV93 (ΔmscLS)	sgRNA G14-R20	C	6.83993	0.0184	0.0130342
AV93 (ΔmscLS)	sgRNA G14-R20	C	6.877	0.0155	0.0109799
AV93 (ΔmscLS)	sgRNA G14-R20	C	6.91407	0.0164	0.0116175
AV93 (ΔmscLS)	sgRNA G14-R20	C	6.95113	0.0165	0.0116883
AV93 (ΔmscLS)	sgRNA G14-R20	C	6.9882	0.0174	0.0123259
AV93 (ΔmscLS)	sgRNA G14-R20	C	7.02527	0.0168	0.0119008
AV93 (ΔmscLS)	sgRNA G14-R20	C	7.06234	0.0163	0.0115466
AV93 (ΔmscLS)	sgRNA G14-R20	C	7.09941	0.0164	0.0116175
AV93 (ΔmscLS)	sgRNA G14-R20	C	7.13648	0.0169	0.0119717
AV93 (ΔmscLS)	sgRNA G14-R20	C	7.17355	0.016	0.0113341
AV93 (ΔmscLS)	sgRNA G14-R20	C	7.21062	0.0165	0.0116883
AV93 (ΔmscLS)	sgRNA G14-R20	C	7.24769	0.0167	0.01183
AV93 (ΔmscLS)	sgRNA G14-R20	C	7.28476	0.017	0.0120425
AV93 (ΔmscLS)	sgRNA G14-R20	C	7.32182	0.0158	0.0111924
AV93 (ΔmscLS)	sgRNA G14-R20	C	7.35889	0.0164	0.0116175
AV93 (ΔmscLS)	sgRNA G14-R20	C	7.39596	0.0171	0.0121133
AV93 (ΔmscLS)	sgRNA G14-R20	C	7.43303	0.0169	0.0119717
AV93 (ΔmscLS)	sgRNA G14-R20	C	7.4701	0.0187	0.0132468
AV93 (ΔmscLS)	sgRNA G14-R20	C	7.50717	0.016	0.0113341
AV93 (ΔmscLS)	sgRNA G14-R20	C	7.61838	0.0165	0.0116883
AV93 (ΔmscLS)	sgRNA G14-R20	C	7.65545	0.0185	0.0131051
AV93 (ΔmscLS)	sgRNA G14-R20	C	7.69252	0.0177	0.0125384
AV93 (ΔmscLS)	sgRNA G14-R20	C	7.72958	0.0183	0.0129634
AV93 (ΔmscLS)	sgRNA G14-R20	C	7.76665	0.0183	0.0129634
AV93 (ΔmscLS)	sgRNA G14-R20	C	7.80372	0.0174	0.0123259
AV93 (ΔmscLS)	sgRNA G14-R20	C	7.84079	0.0186	0.0131759
AV93 (ΔmscLS)	sgRNA G14-R20	C	7.87786	0.0185	0.0131051
AV93 (ΔmscLS)	sgRNA G14-R20	C	7.91492	0.0191	0.0135301
AV93 (ΔmscLS)	sgRNA G14-R20	C	7.95199	0.0191	0.0135301
AV93 (ΔmscLS)	sgRNA G14-R20	C	7.98906	0.0203	0.0143802
AV93 (ΔmscLS)	sgRNA G14-R20	C	8.02613	0.0186	0.0131759
AV93 (ΔmscLS)	sgRNA G14-R20	C	8.0632	0.0197	0.0139551
AV93 (ΔmscLS)	sgRNA G14-R20	C	8.10027	0.0193	0.0136718
AV93 (ΔmscLS)	sgRNA G14-R20	C	8.13734	0.0203	0.0143802
AV93 (ΔmscLS)	sgRNA G14-R20	C	8.17441	0.0186	0.0131759
AV93 (ΔmscLS)	sgRNA G14-R20	C	8.21148	0.0211	0.0149469
AV93 (ΔmscLS)	sgRNA G14-R20	C	8.24854	0.0207	0.0146635
AV93 (ΔmscLS)	sgRNA G14-R20	C	8.28561	0.0227	0.0160803
AV93 (ΔmscLS)	sgRNA G14-R20	C	8.32268	0.0219	0.0155136
AV93 (ΔmscLS)	sgRNA G14-R20	C	8.35975	0.0212	0.0150177
AV93 (ΔmscLS)	sgRNA G14-R20	C	8.39681	0.0229	0.016222
AV93 (ΔmscLS)	sgRNA G14-R20	C	8.43388	0.0226	0.0160094
AV93 (ΔmscLS)	sgRNA G14-R20	C	8.47095	0.0219	0.0155136
AV93 (ΔmscLS)	sgRNA G14-R20	C	8.50802	0.0231	0.0163636
AV93 (ΔmscLS)	sgRNA G14-R20	C	8.54509	0.0246	0.0174262
AV93 (ΔmscLS)	sgRNA G14-R20	C	8.58215	0.0226	0.0160094
AV93 (ΔmscLS)	sgRNA G14-R20	C	8.61922	0.0248	0.0175679
AV93 (ΔmscLS)	sgRNA G14-R20	C	8.65629	0.0263	0.0186305
AV93 (ΔmscLS)	sgRNA G14-R20	C	8.69336	0.0255	0.0180638
AV93 (ΔmscLS)	sgRNA G14-R20	C	8.73043	0.0254	0.0179929
AV93 (ΔmscLS)	sgRNA G14-R20	C	8.7675	0.0256	0.0181346
AV93 (ΔmscLS)	sgRNA G14-R20	C	8.80457	0.0265	0.0187721
AV93 (ΔmscLS)	sgRNA G14-R20	C	8.84164	0.0268	0.0189847
AV93 (ΔmscLS)	sgRNA G14-R20	C	8.87871	0.0267	0.0189138
AV93 (ΔmscLS)	sgRNA G14-R20	C	8.91578	0.0294	0.0208264
AV93 (ΔmscLS)	sgRNA G14-R20	C	8.95285	0.0296	0.0209681
AV93 (ΔmscLS)	sgRNA G14-R20	C	8.98991	0.0294	0.0208264
AV93 (ΔmscLS)	sgRNA G14-R20	C	9.02698	0.0293	0.0207556
AV93 (ΔmscLS)	sgRNA G14-R20	C	9.06405	0.0295	0.0208973
AV93 (ΔmscLS)	sgRNA G14-R20	C	9.10112	0.0292	0.0206848
AV93 (ΔmscLS)	sgRNA G14-R20	C	9.13819	0.0296	0.0209681
AV93 (ΔmscLS)	sgRNA G14-R20	C	9.17526	0.0306	0.0216765
AV93 (ΔmscLS)	sgRNA G14-R20	C	9.21233	0.0328	0.0232349
AV93 (ΔmscLS)	sgRNA G14-R20	C	9.2494	0.033	0.0233766
AV93 (ΔmscLS)	sgRNA G14-R20	C	9.28647	0.032	0.0226682
AV93 (ΔmscLS)	sgRNA G14-R20	C	9.32354	0.0344	0.0243684
AV93 (ΔmscLS)	sgRNA G14-R20	C	9.3606	0.034	0.024085
AV93 (ΔmscLS)	sgRNA G14-R20	C	9.39767	0.0345	0.0244392
AV93 (ΔmscLS)	sgRNA G14-R20	C	9.43474	0.0353	0.0250059
AV93 (ΔmscLS)	sgRNA G14-R20	C	9.47181	0.0367	0.0259976
AV93 (ΔmscLS)	sgRNA G14-R20	C	9.50888	0.0358	0.0253601
AV93 (ΔmscLS)	sgRNA G14-R20	C	9.54595	0.0369	0.0261393
AV93 (ΔmscLS)	sgRNA G14-R20	C	9.58302	0.0362	0.0256434
AV93 (ΔmscLS)	sgRNA G14-R20	C	9.62009	0.0388	0.0274852
AV93 (ΔmscLS)	sgRNA G14-R20	C	9.65716	0.0386	0.0273436
AV93 (ΔmscLS)	sgRNA G14-R20	C	9.69423	0.0388	0.0274852
AV93 (ΔmscLS)	sgRNA G14-R20	C	9.7313	0.0373	0.0264227
AV93 (ΔmscLS)	sgRNA G14-R20	C	9.76836	0.0388	0.0274852
AV93 (ΔmscLS)	sgRNA G14-R20	C	9.80543	0.0403	0.0285478
AV93 (ΔmscLS)	sgRNA G14-R20	C	9.8425	0.0406	0.0287603
AV93 (ΔmscLS)	sgRNA G14-R20	C	9.87957	0.041	0.0290437
AV93 (ΔmscLS)	sgRNA G14-R20	C	9.91664	0.0407	0.0288312
AV93 (ΔmscLS)	sgRNA G14-R20	C	9.95371	0.0421	0.0298229
AV93 (ΔmscLS)	sgRNA G14-R20	C	9.99077	0.0428	0.0303188
AV44	sgRNA GØ-RØ	A	2.02136	0.0096	0.00258007
AV44	sgRNA GØ-RØ	A	2.0595	0.0099	0.00266069
AV44	sgRNA GØ-RØ	A	2.09764	0.0107	0.0028757
AV44	sgRNA GØ-RØ	A	2.13578	0.0109	0.00292945
AV44	sgRNA GØ-RØ	A	2.17391	0.0106	0.00284882
AV44	sgRNA GØ-RØ	A	2.21205	0.0108	0.00290258
AV44	sgRNA GØ-RØ	A	2.25019	0.0109	0.00292945
AV44	sgRNA GØ-RØ	A	2.28833	0.0119	0.00319821
AV44	sgRNA GØ-RØ	A	2.32646	0.0112	0.00301008
AV44	sgRNA GØ-RØ	A	2.3646	0.0122	0.00327884
AV44	sgRNA GØ-RØ	A	2.40274	0.0125	0.00335946
AV44	sgRNA GØ-RØ	A	2.44087	0.0128	0.00344009
AV44	sgRNA GØ-RØ	A	2.47901	0.0128	0.00344009
AV44	sgRNA GØ-RØ	A	2.51715	0.013	0.00349384
AV44	sgRNA GØ-RØ	A	2.55528	0.0135	0.00362822
AV44	sgRNA GØ-RØ	A	2.59342	0.0141	0.00378947
AV44	sgRNA GØ-RØ	A	2.63155	0.0143	0.00384323
AV44	sgRNA GØ-RØ	A	2.66969	0.0145	0.00389698
AV44	sgRNA GØ-RØ	A	2.70783	0.0149	0.00400448
AV44	sgRNA GØ-RØ	A	2.74596	0.0152	0.00408511
AV44	sgRNA GØ-RØ	A	2.7841	0.0155	0.00416573
AV44	sgRNA GØ-RØ	A	2.82224	0.0162	0.00435386
AV44	sgRNA GØ-RØ	A	2.86037	0.0164	0.00440761
AV44	sgRNA GØ-RØ	A	2.89851	0.0165	0.00443449
AV44	sgRNA GØ-RØ	A	2.93664	0.0174	0.00467637
AV44	sgRNA GØ-RØ	A	2.97478	0.0173	0.0046495
AV44	sgRNA GØ-RØ	A	3.01291	0.0178	0.00478387
AV44	sgRNA GØ-RØ	A	3.05105	0.0176	0.00473012
AV44	sgRNA GØ-RØ	A	3.08919	0.0184	0.00494513
AV44	sgRNA GØ-RØ	A	3.12732	0.0191	0.00513326
AV44	sgRNA GØ-RØ	A	3.16546	0.0195	0.00524076
AV44	sgRNA GØ-RØ	A	3.2036	0.0195	0.00524076
AV44	sgRNA GØ-RØ	A	3.24174	0.0202	0.00542889
AV44	sgRNA GØ-RØ	A	3.27987	0.0208	0.00559015
AV44	sgRNA GØ-RØ	A	3.31801	0.0209	0.00561702
AV44	sgRNA GØ-RØ	A	3.35615	0.0214	0.0057514
AV44	sgRNA GØ-RØ	A	3.39429	0.0216	0.00580515
AV44	sgRNA GØ-RØ	A	3.43242	0.0224	0.00602016
AV44	sgRNA GØ-RØ	A	3.47056	0.0226	0.00607391
AV44	sgRNA GØ-RØ	A	3.5087	0.023	0.00618141
AV44	sgRNA GØ-RØ	A	3.54683	0.0238	0.00639642
AV44	sgRNA GØ-RØ	A	3.58497	0.0241	0.00647704
AV44	sgRNA GØ-RØ	A	3.62311	0.0246	0.00661142
AV44	sgRNA GØ-RØ	A	3.66125	0.0254	0.00682643
AV44	sgRNA GØ-RØ	A	3.69939	0.0259	0.00696081
AV44	sgRNA GØ-RØ	A	3.73753	0.0253	0.00679955
AV44	sgRNA GØ-RØ	A	3.77566	0.0269	0.00722956
AV44	sgRNA GØ-RØ	A	3.8138	0.0271	0.00728331
AV44	sgRNA GØ-RØ	A	3.85193	0.0275	0.00739082
AV44	sgRNA GØ-RØ	A	3.89007	0.0284	0.0076327
AV44	sgRNA GØ-RØ	A	3.92821	0.0291	0.00782083
AV44	sgRNA GØ-RØ	A	3.96635	0.0295	0.00792833
AV44	sgRNA GØ-RØ	A	4.00448	0.0305	0.00819709
AV44	sgRNA GØ-RØ	A	4.04262	0.0311	0.00835834
AV44	sgRNA GØ-RØ	A	4.08076	0.0315	0.00846585
AV44	sgRNA GØ-RØ	A	4.1189	0.0317	0.0085196
AV44	sgRNA GØ-RØ	A	4.15703	0.0325	0.0087346
AV44	sgRNA GØ-RØ	A	4.19517	0.0337	0.00905711
AV44	sgRNA GØ-RØ	A	4.23331	0.034	0.00913774
AV44	sgRNA GØ-RØ	A	4.27144	0.0349	0.00937962
AV44	sgRNA GØ-RØ	A	4.30958	0.0356	0.00956775
AV44	sgRNA GØ-RØ	A	4.34771	0.0362	0.009729
AV44	sgRNA GØ-RØ	A	4.38586	0.0365	0.00980963
AV44	sgRNA GØ-RØ	A	4.42399	0.0375	0.0100784
AV44	sgRNA GØ-RØ	A	4.46213	0.0385	0.0103471
AV44	sgRNA GØ-RØ	A	4.50026	0.0392	0.0105353
AV44	sgRNA GØ-RØ	A	4.5384	0.0402	0.010804
AV44	sgRNA GØ-RØ	A	4.57653	0.0407	0.0109384
AV44	sgRNA GØ-RØ	A	4.61467	0.0423	0.0113684
AV44	sgRNA GØ-RØ	A	4.6528	0.0428	0.0115028
AV44	sgRNA GØ-RØ	A	4.69094	0.0435	0.0116909
AV44	sgRNA GØ-RØ	A	4.72907	0.0445	0.0119597
AV44	sgRNA GØ-RØ	A	4.76721	0.0445	0.0119597
AV44	sgRNA GØ-RØ	A	4.80535	0.0459	0.0123359
AV44	sgRNA GØ-RØ	A	4.84348	0.0464	0.0124703
AV44	sgRNA GØ-RØ	A	4.88162	0.0478	0.0128466
AV44	sgRNA GØ-RØ	A	4.91976	0.0488	0.0131153
AV44	sgRNA GØ-RØ	A	4.95789	0.0499	0.013411
AV44	sgRNA GØ-RØ	A	4.99603	0.0508	0.0136529
AV44	sgRNA GØ-RØ	A	5.03417	0.0518	0.0139216
AV44	sgRNA GØ-RØ	A	5.0723	0.0531	0.014271
AV44	sgRNA GØ-RØ	A	5.11044	0.0543	0.0145935
AV44	sgRNA GØ-RØ	A	5.14858	0.0551	0.0148085
AV44	sgRNA GØ-RØ	A	5.18671	0.057	0.0153191
AV44	sgRNA GØ-RØ	A	5.22485	0.0576	0.0154804
AV44	sgRNA GØ-RØ	A	5.26298	0.0586	0.0157492
AV44	sgRNA GØ-RØ	A	5.30112	0.0597	0.0160448
AV44	sgRNA GØ-RØ	A	5.33925	0.061	0.0163942
AV44	sgRNA GØ-RØ	A	5.37739	0.0623	0.0167436
AV44	sgRNA GØ-RØ	A	5.41553	0.0637	0.0171198
AV44	sgRNA GØ-RØ	A	5.45366	0.0649	0.0174423
AV44	sgRNA GØ-RØ	A	5.4918	0.0662	0.0177917
AV44	sgRNA GØ-RØ	A	5.52994	0.0683	0.0183561
AV44	sgRNA GØ-RØ	A	5.56807	0.0697	0.0187324
AV44	sgRNA GØ-RØ	A	5.60621	0.0713	0.0191624
AV44	sgRNA GØ-RØ	A	5.64434	0.0719	0.0193236
AV44	sgRNA GØ-RØ	A	5.68248	0.0741	0.0199149
AV44	sgRNA GØ-RØ	A	5.72062	0.0749	0.0201299
AV44	sgRNA GØ-RØ	A	5.98735	0.0894	0.0240269
AV44	sgRNA GØ-RØ	A	6.02442	0.0907	0.0243763
AV44	sgRNA GØ-RØ	A	6.06148	0.0913	0.0245375
AV44	sgRNA GØ-RØ	A	6.09855	0.0923	0.0248063
AV44	sgRNA GØ-RØ	A	6.13562	0.0939	0.0252363
AV44	sgRNA GØ-RØ	A	6.17269	0.0956	0.0256932
AV44	sgRNA GØ-RØ	A	6.20975	0.0978	0.0262844
AV44	sgRNA GØ-RØ	A	6.24682	0.0998	0.0268219
AV44	sgRNA GØ-RØ	A	6.28389	0.101	0.0271445
AV44	sgRNA GØ-RØ	A	6.32096	0.1012	0.0271982
AV44	sgRNA GØ-RØ	A	6.35803	0.1013	0.0272251
AV44	sgRNA GØ-RØ	A	6.43216	0.1021	0.0274401
AV44	sgRNA GØ-RØ	A	6.46924	0.1035	0.0278163
AV44	sgRNA GØ-RØ	A	6.50631	0.1055	0.0283539
AV44	sgRNA GØ-RØ	A	6.54338	0.1082	0.0290795
AV44	sgRNA GØ-RØ	A	6.58044	0.1091	0.0293214
AV44	sgRNA GØ-RØ	A	6.61752	0.1115	0.0299664
AV44	sgRNA GØ-RØ	A	6.65459	0.1135	0.0305039
AV44	sgRNA GØ-RØ	A	6.69166	0.115	0.0309071
AV44	sgRNA GØ-RØ	A	6.72872	0.1173	0.0315252
AV44	sgRNA GØ-RØ	A	6.76579	0.1152	0.0309608
AV44	sgRNA GØ-RØ	A	6.80286	0.1161	0.0312027
AV44	sgRNA GØ-RØ	A	6.83993	0.119	0.0319821
AV44	sgRNA GØ-RØ	A	6.877	0.1198	0.0321971
AV44	sgRNA GØ-RØ	A	6.91407	0.1216	0.0326809
AV44	sgRNA GØ-RØ	A	6.95113	0.1241	0.0333527
AV44	sgRNA GØ-RØ	A	6.9882	0.1248	0.0335409
AV44	sgRNA GØ-RØ	A	7.02527	0.1266	0.0340246
AV44	sgRNA GØ-RØ	A	7.06234	0.1285	0.0345353
AV44	sgRNA GØ-RØ	A	7.09941	0.1303	0.035019
AV44	sgRNA GØ-RØ	A	7.13648	0.1324	0.0355834
AV44	sgRNA GØ-RØ	A	7.17355	0.1332	0.0357984
AV44	sgRNA GØ-RØ	A	7.21062	0.1351	0.0363091
AV44	sgRNA GØ-RØ	A	7.24769	0.1365	0.0366853
AV44	sgRNA GØ-RØ	A	7.28476	0.1379	0.0370616
AV44	sgRNA GØ-RØ	A	7.32182	0.14	0.037626
AV44	sgRNA GØ-RØ	A	7.35889	0.1409	0.0378679
AV44	sgRNA GØ-RØ	A	7.39596	0.1423	0.0382441
AV44	sgRNA GØ-RØ	A	7.43303	0.1432	0.038486
AV44	sgRNA GØ-RØ	A	7.4701	0.1446	0.0388623
AV44	sgRNA GØ-RØ	A	7.50717	0.144	0.038701
AV44	sgRNA GØ-RØ	A	7.54424	0.1459	0.0392116
AV44	sgRNA GØ-RØ	A	7.58131	0.1464	0.039346
AV44	sgRNA GØ-RØ	A	7.61838	0.1485	0.0399104
AV44	sgRNA GØ-RØ	A	7.65545	0.1488	0.039991
AV44	sgRNA GØ-RØ	A	7.69252	0.1526	0.0410123
AV44	sgRNA GØ-RØ	A	7.72958	0.1538	0.0413348
AV44	sgRNA GØ-RØ	A	7.76665	0.1557	0.0418455
AV44	sgRNA GØ-RØ	A	7.80372	0.1567	0.0421142
AV44	sgRNA GØ-RØ	A	7.84079	0.1582	0.0425174
AV44	sgRNA GØ-RØ	A	7.87786	0.159	0.0427324
AV44	sgRNA GØ-RØ	A	7.91492	0.1624	0.0436461
AV44	sgRNA GØ-RØ	A	7.95199	0.1636	0.0439686
AV44	sgRNA GØ-RØ	A	7.98906	0.164	0.0440761
AV44	sgRNA GØ-RØ	A	8.02613	0.1675	0.0450168
AV44	sgRNA GØ-RØ	A	8.0632	0.1666	0.0447749
AV44	sgRNA GØ-RØ	A	8.10027	0.1704	0.0457962
AV44	sgRNA GØ-RØ	A	8.13734	0.173	0.046495
AV44	sgRNA GØ-RØ	A	8.17441	0.1748	0.0469787
AV44	sgRNA GØ-RØ	A	8.21148	0.1759	0.0472744
AV44	sgRNA GØ-RØ	A	8.24854	0.1792	0.0481613
AV44	sgRNA GØ-RØ	A	8.28561	0.1799	0.0483494
AV44	sgRNA GØ-RØ	A	8.32268	0.1824	0.0490213
AV44	sgRNA GØ-RØ	A	8.35975	0.1849	0.0496932
AV44	sgRNA GØ-RØ	A	8.39681	0.1875	0.0503919
AV44	sgRNA GØ-RØ	A	8.43388	0.1885	0.0506607
AV44	sgRNA GØ-RØ	A	8.47095	0.1915	0.051467
AV44	sgRNA GØ-RØ	A	8.50802	0.1937	0.0520582
AV44	sgRNA GØ-RØ	A	8.54509	0.1955	0.052542
AV44	sgRNA GØ-RØ	A	8.58215	0.1979	0.053187
AV44	sgRNA GØ-RØ	A	8.61922	0.2003	0.053832
AV44	sgRNA GØ-RØ	A	8.65629	0.2023	0.0543695
AV44	sgRNA GØ-RØ	A	8.69336	0.2054	0.0552027
AV44	sgRNA GØ-RØ	A	8.73043	0.2075	0.0557671
AV44	sgRNA GØ-RØ	A	8.7675	0.2098	0.0563852
AV44	sgRNA GØ-RØ	A	8.80457	0.2119	0.0569496
AV44	sgRNA GØ-RØ	A	8.84164	0.2147	0.0577021
AV44	sgRNA GØ-RØ	A	8.87871	0.2172	0.058374
AV44	sgRNA GØ-RØ	A	8.91578	0.2211	0.0594222
AV44	sgRNA GØ-RØ	A	8.95285	0.2236	0.0600941
AV44	sgRNA GØ-RØ	A	8.98991	0.2249	0.0604434
AV44	sgRNA GØ-RØ	A	9.02698	0.2275	0.0611422
AV44	sgRNA GØ-RØ	A	9.06405	0.2289	0.0615185
AV44	sgRNA GØ-RØ	A	9.10112	0.2339	0.0628623
AV44	sgRNA GØ-RØ	A	9.13819	0.2357	0.063346
AV44	sgRNA GØ-RØ	A	9.17526	0.2388	0.0641792
AV44	sgRNA GØ-RØ	A	9.21233	0.2407	0.0646898
AV44	sgRNA GØ-RØ	A	9.2494	0.2436	0.0654692
AV44	sgRNA GØ-RØ	A	9.28647	0.2469	0.0663561
AV44	sgRNA GØ-RØ	A	9.32354	0.2496	0.0670817
AV44	sgRNA GØ-RØ	A	9.3606	0.2527	0.0679149
AV44	sgRNA GØ-RØ	A	9.43474	0.2596	0.0697693
AV44	sgRNA GØ-RØ	A	9.47181	0.261	0.0701456
AV44	sgRNA GØ-RØ	A	9.50888	0.2655	0.071355
AV44	sgRNA GØ-RØ	A	9.54595	0.2687	0.072215
AV44	sgRNA GØ-RØ	A	9.58302	0.2708	0.0727794
AV44	sgRNA GØ-RØ	A	9.62009	0.2722	0.0731557
AV44	sgRNA GØ-RØ	A	9.65716	0.2777	0.0746338
AV44	sgRNA GØ-RØ	A	9.69423	0.2802	0.0753057
AV44	sgRNA GØ-RØ	A	9.7313	0.2835	0.0761926
AV44	sgRNA GØ-RØ	A	9.76836	0.2872	0.077187
AV44	sgRNA GØ-RØ	A	9.80543	0.2888	0.077617
AV44	sgRNA GØ-RØ	A	9.8425	0.2918	0.0784233
AV44	sgRNA GØ-RØ	A	9.87957	0.2966	0.0797133
AV44	sgRNA GØ-RØ	A	9.91664	0.301	0.0808959
AV44	sgRNA GØ-RØ	A	9.95371	0.3044	0.0818096
AV44	sgRNA GØ-RØ	A	9.99077	0.3075	0.0826428
AV44	sgRNA G14-R20	A	2.02136	0.0096	0.00428571
AV44	sgRNA G14-R20	A	2.0595	0.0094	0.00419643
AV44	sgRNA G14-R20	A	2.09764	0.0098	0.004375
AV44	sgRNA G14-R20	A	2.13578	0.0099	0.00441964
AV44	sgRNA G14-R20	A	2.17391	0.0102	0.00455357
AV44	sgRNA G14-R20	A	2.21205	0.0102	0.00455357
AV44	sgRNA G14-R20	A	2.25019	0.0105	0.0046875
AV44	sgRNA G14-R20	A	2.28833	0.0107	0.00477679
AV44	sgRNA G14-R20	A	2.32646	0.011	0.00491071
AV44	sgRNA G14-R20	A	2.3646	0.0108	0.00482143
AV44	sgRNA G14-R20	A	2.40274	0.0116	0.00517857
AV44	sgRNA G14-R20	A	2.44087	0.0113	0.00504464
AV44	sgRNA G14-R20	A	2.47901	0.0118	0.00526786
AV44	sgRNA G14-R20	A	2.51715	0.0119	0.0053125
AV44	sgRNA G14-R20	A	2.55528	0.012	0.00535714
AV44	sgRNA G14-R20	A	2.59342	0.0127	0.00566964
AV44	sgRNA G14-R20	A	2.63155	0.0127	0.00566964
AV44	sgRNA G14-R20	A	2.66969	0.0128	0.00571429
AV44	sgRNA G14-R20	A	2.70783	0.0134	0.00598214
AV44	sgRNA G14-R20	A	2.74596	0.0129	0.00575893
AV44	sgRNA G14-R20	A	2.7841	0.0137	0.00611607
AV44	sgRNA G14-R20	A	2.82224	0.0139	0.00620536
AV44	sgRNA G14-R20	A	2.86037	0.0146	0.00651786
AV44	sgRNA G14-R20	A	2.89851	0.0142	0.00633929
AV44	sgRNA G14-R20	A	2.93664	0.0149	0.00665179
AV44	sgRNA G14-R20	A	2.97478	0.015	0.00669643
AV44	sgRNA G14-R20	A	3.01291	0.0155	0.00691964
AV44	sgRNA G14-R20	A	3.05105	0.0155	0.00691964
AV44	sgRNA G14-R20	A	3.08919	0.0151	0.00674107
AV44	sgRNA G14-R20	A	3.12732	0.0162	0.00723214
AV44	sgRNA G14-R20	A	3.16546	0.0163	0.00727679
AV44	sgRNA G14-R20	A	3.2036	0.0164	0.00732143
AV44	sgRNA G14-R20	A	3.24174	0.0164	0.00732143
AV44	sgRNA G14-R20	A	3.27987	0.017	0.00758929
AV44	sgRNA G14-R20	A	3.31801	0.0172	0.00767857
AV44	sgRNA G14-R20	A	3.35615	0.0174	0.00776786
AV44	sgRNA G14-R20	A	3.39429	0.0177	0.00790179
AV44	sgRNA G14-R20	A	3.43242	0.0179	0.00799107
AV44	sgRNA G14-R20	A	3.47056	0.0181	0.00808036
AV44	sgRNA G14-R20	A	3.5087	0.0186	0.00830357
AV44	sgRNA G14-R20	A	3.54683	0.0189	0.0084375
AV44	sgRNA G14-R20	A	3.58497	0.0191	0.00852679
AV44	sgRNA G14-R20	A	3.62311	0.0194	0.00866071
AV44	sgRNA G14-R20	A	3.66125	0.0196	0.00875
AV44	sgRNA G14-R20	A	3.69939	0.02	0.00892857
AV44	sgRNA G14-R20	A	3.73753	0.0205	0.00915179
AV44	sgRNA G14-R20	A	3.77566	0.0206	0.00919643
AV44	sgRNA G14-R20	A	3.8138	0.021	0.009375
AV44	sgRNA G14-R20	A	3.85193	0.0213	0.00950893
AV44	sgRNA G14-R20	A	3.89007	0.0213	0.00950893
AV44	sgRNA G14-R20	A	3.92821	0.022	0.00982143
AV44	sgRNA G14-R20	A	3.96635	0.0225	0.0100446
AV44	sgRNA G14-R20	A	4.00448	0.0225	0.0100446
AV44	sgRNA G14-R20	A	4.04262	0.0231	0.0103125
AV44	sgRNA G14-R20	A	4.08076	0.0233	0.0104018
AV44	sgRNA G14-R20	A	4.1189	0.0234	0.0104464
AV44	sgRNA G14-R20	A	4.15703	0.0237	0.0105804
AV44	sgRNA G14-R20	A	4.19517	0.0244	0.0108929
AV44	sgRNA G14-R20	A	4.23331	0.025	0.0111607
AV44	sgRNA G14-R20	A	4.27144	0.0253	0.0112946
AV44	sgRNA G14-R20	A	4.30958	0.0257	0.0114732
AV44	sgRNA G14-R20	A	4.34771	0.0258	0.0115179
AV44	sgRNA G14-R20	A	4.38586	0.0263	0.0117411
AV44	sgRNA G14-R20	A	4.42399	0.0269	0.0120089
AV44	sgRNA G14-R20	A	4.46213	0.0276	0.0123214
AV44	sgRNA G14-R20	A	4.50026	0.0277	0.0123661
AV44	sgRNA G14-R20	A	4.5384	0.0281	0.0125446
AV44	sgRNA G14-R20	A	4.57653	0.0286	0.0127679
AV44	sgRNA G14-R20	A	4.61467	0.0295	0.0131696
AV44	sgRNA G14-R20	A	4.6528	0.0299	0.0133482
AV44	sgRNA G14-R20	A	4.69094	0.0305	0.0136161
AV44	sgRNA G14-R20	A	4.72907	0.0315	0.0140625
AV44	sgRNA G14-R20	A	4.76721	0.0317	0.0141518
AV44	sgRNA G14-R20	A	4.80535	0.0317	0.0141518
AV44	sgRNA G14-R20	A	4.84348	0.0325	0.0145089
AV44	sgRNA G14-R20	A	4.88162	0.0329	0.0146875
AV44	sgRNA G14-R20	A	4.91976	0.0334	0.0149107
AV44	sgRNA G14-R20	A	4.95789	0.0341	0.0152232
AV44	sgRNA G14-R20	A	4.99603	0.0344	0.0153571
AV44	sgRNA G14-R20	A	5.03417	0.0346	0.0154464
[truncated: 330 more rows]

## Sheet: Fig2S1
Raw data						Fit parameters
Strain	Time (min)	H³-mDAP (CPM)	OD_600	Replicate		Strain	PBP1a level (%)	PBP1b level (%)	kin
AV84 ΔmrcB	20	3469	0.500741	A		GØ-RØ	1300	370	786±16
AV84 ΔmrcB	20	4700	0.46865	B		GØ-RØ	1300	370	943±27
AV84 G20-RØ	20	4899	0.512276	A		GØ-RØ	1300	370	886±59
AV84 G20-RØ	20	6450	0.476914	B		G14-R20	20	30	873±77
AV84 GØ-RØ	22	5261	0.376188	A		G14-R20	20	30	760±67
AV84 GØ-RØ	22	5339	0.35483	B		G14-R20	20	30	863±46
AV84 GØ-RØ	22	3593	0.290951	C		G20-RØ	1300	4	678±32
AV84 G14-R20	22	2686	0.256513	A		G20-RØ	1300	4	706±45
AV84 G14-R20	22	3141	0.345679	B		ΔPBP1b	1300	0	547±51
AV84 G14-R20	22	5101	0.329704	C		ΔPBP1b	1300	0	613±55
AV84 ΔmrcB	41	10998	0.604532	A
AV84 ΔmrcB	41	11504	0.560039	B
AV84 G20-RØ	41	12257	0.591418	A
AV84 G20-RØ	41	11871	0.548638	B
AV84 GØ-RØ	44	10839	0.447097	A
AV84 GØ-RØ	44	11594	0.404475	B
AV84 GØ-RØ	45	10017	0.341423	C
AV84 G14-R20	45	8617	0.299259	A
AV84 G14-R20	45	9942	0.395402	B
AV84 G14-R20	45	11186	0.389731	C
AV84 ΔmrcB	71	15832	0.791197	A
AV84 ΔmrcB	71	15393	0.722349	B
AV84 G20-RØ	71	18676	0.726146	A
AV84 G20-RØ	71	16876	0.670207	B
AV84 GØ-RØ	74	17086	0.565809	A
AV84 GØ-RØ	74	18045	0.483552	B
AV84 GØ-RØ	79	15287	0.432507	C
AV84 G14-R20	79	13386	0.375835	A
AV84 G14-R20	79	14951	0.482304	B
AV84 G14-R20	79	16366	0.499051	C
