# Supplementary material for: Class-A penicillin binding proteins do not contribute to cell shape but repair cell-wall defects
Source: eLife journal article supplement (doi:10.7554/elife.51998), 2020-01-06
Supplement: supp [file elife-51998-supp-v1.zip › elife_poa_e51998_Figure_3_figure_supplement_7.pdf]

Normalized OD

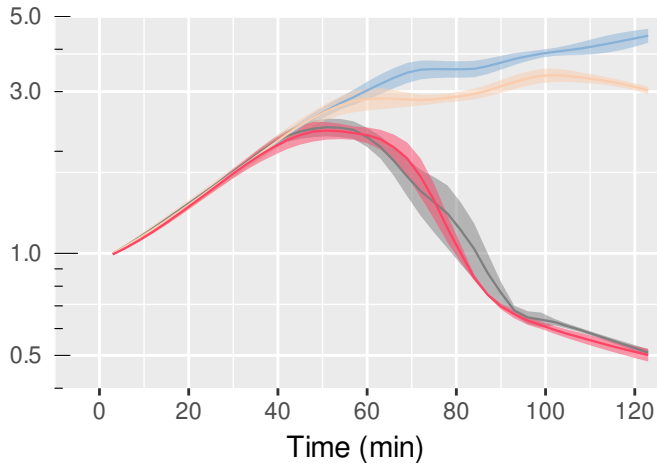

**AV31:**

GFP-PBP1b

WT PBP1a

**MG1655:**

WT PBP1b

WT PBP1a

**AV128:**

GFP-PBP1b\*

$\Delta$ LpoB

WT PBP1a

**AV29:**

$\Delta$ PBP1b

WT PBP1a
