# Supplementary material for: Class-A penicillin binding proteins do not contribute to cell shape but repair cell-wall defects
Source: eLife journal article supplement (doi:10.7554/elife.51998), 2020-01-06
Supplement: supp [file elife-51998-supp-v1.zip › elife_poa_e51998_Figure_3_source_data_1.xlsx]

## Sheet: Fig3A
Cell Id	Time (min)	Length (μm)	Initial_length (μm)	Lysed?
95	1	3.61723	3.63878	FALSE
95	2	3.63878	3.63878	FALSE
95	3	3.64369	3.63878	FALSE
95	4	3.67766	3.63878	FALSE
95	5	3.69137	3.63878	FALSE
95	6	3.72084	3.63878	FALSE
95	7	3.7402	3.63878	FALSE
95	8	3.75372	3.63878	FALSE
95	9	3.77328	3.63878	FALSE
95	10	3.81207	3.63878	FALSE
95	11	3.81096	3.63878	FALSE
95	12	3.83182	3.63878	FALSE
95	13	3.85896	3.63878	FALSE
95	14	3.87757	3.63878	FALSE
95	15	3.89533	3.63878	FALSE
95	16	3.91145	3.63878	FALSE
95	17	3.8928	3.63878	TRUE
95	18	3.90966	3.63878	TRUE
95	19	3.95877	3.63878	TRUE
95	20	3.97327	3.63878	TRUE
95	21	3.98753	3.63878	TRUE
95	22	4.01165	3.63878	TRUE
95	23	4.02244	3.63878	TRUE
95	24	4.04425	3.63878	TRUE
95	25	4.05178	3.63878	TRUE
95	26	4.07435	3.63878	TRUE
95	27	4.07614	3.63878	TRUE
95	28	4.09923	3.63878	TRUE
95	29	4.12085	3.63878	TRUE
95	30	4.1426	3.63878	TRUE
95	31	4.15925	3.63878	TRUE
95	32	4.19293	3.63878	TRUE
95	33	4.19507	3.63878	TRUE
95	34	4.21565	3.63878	TRUE
95	35	4.23237	3.63878	TRUE
95	36	4.25976	3.63878	TRUE
95	37	4.26588	3.63878	TRUE
95	38	4.29168	3.63878	TRUE
95	39	4.29898	3.63878	TRUE
95	40	4.31066	3.63878	TRUE
95	41	4.32217	3.63878	TRUE
95	42	4.3485	3.63878	TRUE
95	43	4.35664	3.63878	TRUE
95	44	4.37467	3.63878	TRUE
95	45	4.38145	3.63878	TRUE
95	46	4.40599	3.63878	TRUE
95	47	4.4161	3.63878	TRUE
95	48	4.41793	3.63878	TRUE
95	49	4.43759	3.63878	TRUE
95	50	4.45779	3.63878	TRUE
95	51	4.4649	3.63878	TRUE
95	52	4.45934	3.63878	TRUE
95	53	4.48629	3.63878	TRUE
95	54	4.49294	3.63878	TRUE
95	55	4.4977	3.63878	TRUE
95	56	4.51474	3.63878	TRUE
95	57	4.52445	3.63878	TRUE
95	58	4.52048	3.63878	TRUE
95	59	4.54241	3.63878	TRUE
95	60	4.5402	3.63878	TRUE
95	61	4.54475	3.63878	TRUE
95	16	3.91145	3.63878	TRUE
50	1	3.71984	3.74736	FALSE
50	2	3.74736	3.74736	FALSE
50	3	3.77784	3.74736	FALSE
50	4	3.79491	3.74736	FALSE
50	5	3.81826	3.74736	FALSE
50	6	3.83424	3.74736	FALSE
50	7	3.85159	3.74736	FALSE
50	8	3.88475	3.74736	FALSE
50	9	3.91668	3.74736	FALSE
50	10	3.94422	3.74736	FALSE
50	11	3.96724	3.74736	FALSE
50	12	3.99567	3.74736	FALSE
50	13	4.02607	3.74736	FALSE
50	14	4.04056	3.74736	FALSE
50	15	4.06039	3.74736	FALSE
50	16	4.10569	3.74736	FALSE
50	17	4.13224	3.74736	FALSE
50	18	4.15482	3.74736	FALSE
50	19	3.53389	3.74736	TRUE
50	20	3.36895	3.74736	TRUE
50	21	3.27818	3.74736	TRUE
50	22	3.21833	3.74736	TRUE
50	23	3.17985	3.74736	TRUE
50	24	3.10397	3.74736	TRUE
50	25	2.98046	3.74736	TRUE
50	18	4.15482	3.74736	TRUE
58	2	3.05499	3.05499	FALSE
58	3	3.05987	3.05499	FALSE
58	4	3.0699	3.05499	FALSE
58	5	3.09359	3.05499	FALSE
58	7	3.117	3.05499	FALSE
58	8	3.14518	3.05499	FALSE
58	9	3.15637	3.05499	FALSE
58	10	3.16804	3.05499	FALSE
58	11	3.19856	3.05499	FALSE
58	13	3.20454	3.05499	FALSE
58	14	3.22301	3.05499	FALSE
58	15	3.24836	3.05499	FALSE
58	16	3.25858	3.05499	FALSE
58	17	3.29544	3.05499	FALSE
58	21	3.407	3.05499	TRUE
58	24	3.4661	3.05499	TRUE
58	30	3.60001	3.05499	TRUE
58	35	3.69984	3.05499	TRUE
58	36	3.70746	3.05499	TRUE
58	41	3.82209	3.05499	TRUE
58	46	3.63013	3.05499	TRUE
58	51	3.39642	3.05499	TRUE
58	56	3.32148	3.05499	TRUE
13	1	3.28739	3.30482	FALSE
13	2	3.30482	3.30482	FALSE
13	3	3.33351	3.30482	FALSE
13	4	3.34404	3.30482	FALSE
13	5	3.37981	3.30482	FALSE
13	6	3.40863	3.30482	FALSE
13	7	3.43716	3.30482	FALSE
13	8	3.46863	3.30482	FALSE
13	9	3.50688	3.30482	FALSE
13	10	3.53382	3.30482	FALSE
13	11	3.5745	3.30482	FALSE
13	12	3.5981	3.30482	FALSE
13	13	3.63053	3.30482	FALSE
13	14	3.65355	3.30482	FALSE
13	15	3.66642	3.30482	FALSE
13	16	3.68401	3.30482	FALSE
13	17	3.70025	3.30482	FALSE
13	18	3.73374	3.30482	FALSE
13	19	3.77925	3.30482	FALSE
13	20	3.80225	3.30482	FALSE
13	38	3.92145	3.30482	TRUE
13	39	3.91156	3.30482	TRUE
13	40	3.92145	3.30482	TRUE
13	41	3.90805	3.30482	TRUE
13	42	3.90786	3.30482	TRUE
13	43	3.90421	3.30482	TRUE
13	44	3.9063	3.30482	TRUE
13	45	3.88883	3.30482	TRUE
13	46	3.88003	3.30482	TRUE
13	47	3.89332	3.30482	TRUE
13	48	3.88541	3.30482	TRUE
13	49	3.88607	3.30482	TRUE
13	50	3.87667	3.30482	TRUE
13	51	3.87717	3.30482	TRUE
13	52	3.86604	3.30482	TRUE
13	53	3.867	3.30482	TRUE
13	54	3.87223	3.30482	TRUE
13	55	3.8716	3.30482	TRUE
13	56	3.86489	3.30482	TRUE
13	57	3.86394	3.30482	TRUE
13	58	3.86978	3.30482	TRUE
13	60	3.85441	3.30482	TRUE
13	61	3.85225	3.30482	TRUE
96	1	2.52072	2.53272	FALSE
96	2	2.53272	2.53272	FALSE
96	3	2.56212	2.53272	FALSE
96	4	2.57832	2.53272	FALSE
96	5	2.59503	2.53272	FALSE
96	6	2.61255	2.53272	FALSE
96	7	2.64617	2.53272	FALSE
96	8	2.65645	2.53272	FALSE
96	9	2.67906	2.53272	FALSE
96	10	2.70177	2.53272	FALSE
96	11	2.71207	2.53272	FALSE
96	12	2.73461	2.53272	FALSE
96	13	2.75662	2.53272	FALSE
96	14	2.78219	2.53272	FALSE
96	15	2.79131	2.53272	FALSE
96	16	2.81447	2.53272	FALSE
96	17	2.83269	2.53272	FALSE
96	18	2.85453	2.53272	FALSE
96	19	2.86063	2.53272	FALSE
96	20	2.89376	2.53272	FALSE
96	21	2.89791	2.53272	FALSE
96	22	2.92117	2.53272	FALSE
96	23	2.8414	2.53272	TRUE
96	24	2.67294	2.53272	TRUE
96	25	2.49627	2.53272	TRUE
96	26	2.35851	2.53272	TRUE
96	27	2.27456	2.53272	TRUE
96	28	2.23645	2.53272	TRUE
96	29	2.21653	2.53272	TRUE
96	30	2.18446	2.53272	TRUE
96	31	2.16299	2.53272	TRUE
96	32	2.13188	2.53272	TRUE
96	33	2.12829	2.53272	TRUE
96	34	2.10827	2.53272	TRUE
96	35	2.11285	2.53272	TRUE
96	36	2.08831	2.53272	TRUE
96	37	2.08325	2.53272	TRUE
96	38	2.05926	2.53272	TRUE
96	39	2.04762	2.53272	TRUE
96	44	2.00449	2.53272	TRUE
96	48	1.97463	2.53272	TRUE
96	50	1.9883	2.53272	TRUE
96	59	1.94433	2.53272	TRUE
96	22	2.92117	2.53272	TRUE
2	3	3.61136	3.59528	FALSE
2	4	3.64223	3.59528	FALSE
2	5	3.6761	3.59528	FALSE
2	6	3.69613	3.59528	FALSE
2	7	3.72312	3.59528	FALSE
2	8	3.75046	3.59528	FALSE
2	9	3.75618	3.59528	FALSE
2	10	3.77073	3.59528	FALSE
2	11	3.79104	3.59528	FALSE
2	12	3.80703	3.59528	FALSE
2	13	3.81801	3.59528	FALSE
2	14	3.85691	3.59528	FALSE
2	15	3.86153	3.59528	FALSE
2	16	3.92024	3.59528	FALSE
2	17	3.92086	3.59528	FALSE
2	18	3.96656	3.59528	FALSE
2	19	3.98416	3.59528	FALSE
2	20	4.03501	3.59528	FALSE
2	21	4.06807	3.59528	FALSE
2	22	4.08471	3.59528	FALSE
2	23	4.12284	3.59528	FALSE
2	24	4.1635	3.59528	FALSE
2	25	4.17518	3.59528	TRUE
2	26	4.22761	3.59528	TRUE
2	27	4.19908	3.59528	TRUE
2	28	4.21494	3.59528	TRUE
2	29	4.27654	3.59528	TRUE
2	30	4.27277	3.59528	TRUE
2	31	4.35035	3.59528	TRUE
2	32	4.34167	3.59528	TRUE
2	33	4.35262	3.59528	TRUE
2	34	4.37233	3.59528	TRUE
2	35	4.36906	3.59528	TRUE
2	36	4.38887	3.59528	TRUE
2	37	4.42979	3.59528	TRUE
2	38	4.45215	3.59528	TRUE
2	39	4.35123	3.59528	TRUE
2	40	4.17898	3.59528	TRUE
2	41	4.15151	3.59528	TRUE
2	42	4.04302	3.59528	TRUE
2	43	3.98943	3.59528	TRUE
2	44	3.9739	3.59528	TRUE
2	45	3.93953	3.59528	TRUE
2	46	3.83997	3.59528	TRUE
2	24	4.1635	3.59528	TRUE
109	1	3.0827	3.08054	FALSE
109	2	3.08054	3.08054	FALSE
109	3	3.08415	3.08054	FALSE
109	4	3.08611	3.08054	FALSE
109	5	3.08383	3.08054	FALSE
109	6	3.11239	3.08054	FALSE
109	7	3.11767	3.08054	FALSE
109	8	3.12345	3.08054	FALSE
109	9	3.16121	3.08054	FALSE
109	10	3.18307	3.08054	FALSE
109	11	3.20166	3.08054	FALSE
109	12	3.21346	3.08054	FALSE
109	13	3.24742	3.08054	FALSE
109	14	3.24994	3.08054	FALSE
109	15	3.27688	3.08054	FALSE
109	16	3.29095	3.08054	FALSE
109	17	3.32401	3.08054	FALSE
109	18	3.33297	3.08054	FALSE
109	19	3.35778	3.08054	FALSE
109	20	3.37148	3.08054	FALSE
109	21	3.38504	3.08054	FALSE
109	22	3.40874	3.08054	FALSE
109	23	3.4124	3.08054	FALSE
109	24	3.42269	3.08054	FALSE
109	25	3.41978	3.08054	FALSE
109	26	3.40763	3.08054	TRUE
109	27	3.42167	3.08054	TRUE
109	28	3.43419	3.08054	TRUE
109	29	3.43775	3.08054	TRUE
109	30	3.4607	3.08054	TRUE
109	31	3.46999	3.08054	TRUE
109	32	3.49327	3.08054	TRUE
109	33	3.52927	3.08054	TRUE
109	34	3.53189	3.08054	TRUE
109	35	3.52852	3.08054	TRUE
109	36	3.55977	3.08054	TRUE
109	37	3.57124	3.08054	TRUE
109	38	3.5814	3.08054	TRUE
109	39	3.58918	3.08054	TRUE
109	40	3.6041	3.08054	TRUE
109	41	3.61129	3.08054	TRUE
109	42	3.62216	3.08054	TRUE
109	43	3.63125	3.08054	TRUE
109	44	3.66045	3.08054	TRUE
109	45	3.66098	3.08054	TRUE
109	46	3.68335	3.08054	TRUE
109	47	3.68215	3.08054	TRUE
109	48	3.68869	3.08054	TRUE
109	49	3.70795	3.08054	TRUE
109	50	3.71704	3.08054	TRUE
109	51	3.72523	3.08054	TRUE
109	52	3.7263	3.08054	TRUE
109	53	3.75125	3.08054	TRUE
109	54	3.74945	3.08054	TRUE
109	55	3.75902	3.08054	TRUE
109	56	3.77037	3.08054	TRUE
109	57	3.78164	3.08054	TRUE
109	58	3.78794	3.08054	TRUE
109	59	3.80758	3.08054	TRUE
109	60	3.79727	3.08054	TRUE
109	61	3.8119	3.08054	TRUE
109	25	3.41978	3.08054	TRUE
113	1	3.60063	3.61237	FALSE
113	2	3.61237	3.61237	FALSE
113	3	3.64679	3.61237	FALSE
113	4	3.66537	3.61237	FALSE
113	5	3.69586	3.61237	FALSE
113	6	3.72589	3.61237	FALSE
113	7	3.76276	3.61237	FALSE
113	8	3.80468	3.61237	FALSE
113	9	3.83083	3.61237	FALSE
113	10	3.87209	3.61237	FALSE
113	11	3.9027	3.61237	FALSE
113	12	3.92871	3.61237	FALSE
113	13	3.96023	3.61237	FALSE
113	14	3.98562	3.61237	FALSE
113	15	4.03258	3.61237	FALSE
113	16	4.05804	3.61237	FALSE
113	17	4.10187	3.61237	FALSE
113	18	4.1388	3.61237	FALSE
113	19	4.16837	3.61237	FALSE
113	20	4.1955	3.61237	FALSE
113	21	4.23016	3.61237	FALSE
113	22	4.26447	3.61237	FALSE
113	23	4.30042	3.61237	FALSE
113	24	4.3372	3.61237	FALSE
113	25	4.39335	3.61237	FALSE
113	26	4.43627	3.61237	FALSE
113	27	4.47762	3.61237	FALSE
113	28	4.51304	3.61237	FALSE
113	29	4.24257	3.61237	TRUE
113	30	3.9272	3.61237	TRUE
113	31	3.75747	3.61237	TRUE
113	32	3.75492	3.61237	TRUE
113	33	3.85723	3.61237	TRUE
113	34	3.83091	3.61237	TRUE
73	1	3.04391	3.05298	FALSE
73	2	3.05298	3.05298	FALSE
73	4	3.10062	3.05298	FALSE
73	5	3.11825	3.05298	FALSE
73	6	3.13923	3.05298	FALSE
73	7	3.16412	3.05298	FALSE
73	8	3.17999	3.05298	FALSE
73	10	3.23285	3.05298	FALSE
73	11	3.2639	3.05298	FALSE
73	12	3.28668	3.05298	FALSE
73	13	3.31623	3.05298	FALSE
73	14	3.35397	3.05298	FALSE
73	15	3.38699	3.05298	FALSE
73	16	3.41253	3.05298	FALSE
73	17	3.43806	3.05298	FALSE
73	18	3.45463	3.05298	FALSE
73	22	3.51094	3.05298	FALSE
73	23	3.51668	3.05298	FALSE
73	24	3.53292	3.05298	FALSE
73	25	3.53983	3.05298	FALSE
73	26	3.55719	3.05298	FALSE
73	32	3.66233	3.05298	TRUE
73	33	3.67594	3.05298	TRUE
73	34	3.69673	3.05298	TRUE
73	35	3.7061	3.05298	TRUE
73	38	3.76411	3.05298	TRUE
73	39	3.79071	3.05298	TRUE
73	40	3.81972	3.05298	TRUE
73	45	3.3848	3.05298	TRUE
90	1	3.04856	3.06108	FALSE
90	2	3.06108	3.06108	FALSE
90	3	3.0913	3.06108	FALSE
90	4	3.09502	3.06108	FALSE
90	5	3.12104	3.06108	FALSE
90	6	3.13465	3.06108	FALSE
90	7	3.1693	3.06108	FALSE
90	8	3.19595	3.06108	FALSE
90	9	3.23708	3.06108	FALSE
90	10	3.27223	3.06108	FALSE
90	11	3.29248	3.06108	FALSE
90	12	3.32927	3.06108	FALSE
90	13	3.36907	3.06108	FALSE
90	14	3.39227	3.06108	FALSE
90	15	3.43012	3.06108	FALSE
90	16	3.45562	3.06108	FALSE
90	17	3.49112	3.06108	FALSE
90	18	3.51462	3.06108	FALSE
90	19	3.54853	3.06108	FALSE
90	20	3.57664	3.06108	FALSE
90	21	3.60204	3.06108	FALSE
90	22	3.62319	3.06108	FALSE
90	23	3.66115	3.06108	FALSE
90	24	3.68487	3.06108	FALSE
90	25	3.70634	3.06108	FALSE
90	26	3.75003	3.06108	FALSE
90	27	3.78394	3.06108	FALSE
90	28	3.81048	3.06108	FALSE
90	29	3.6792	3.06108	TRUE
110	1	3.54141	3.56286	FALSE
110	2	3.56286	3.56286	FALSE
110	3	3.58506	3.56286	FALSE
110	4	3.62252	3.56286	FALSE
110	5	3.65192	3.56286	FALSE
110	6	3.68124	3.56286	FALSE
110	7	3.71452	3.56286	FALSE
110	8	3.74169	3.56286	FALSE
110	9	3.75795	3.56286	FALSE
110	10	3.79677	3.56286	FALSE
110	11	3.83075	3.56286	FALSE
110	12	3.85839	3.56286	FALSE
110	13	3.87684	3.56286	FALSE
110	14	3.92313	3.56286	FALSE
110	15	3.92278	3.56286	FALSE
110	16	3.9614	3.56286	FALSE
110	17	3.99548	3.56286	FALSE
110	18	4.02302	3.56286	FALSE
110	19	4.04637	3.56286	FALSE
110	20	4.08137	3.56286	FALSE
110	21	4.11639	3.56286	FALSE
110	22	4.15824	3.56286	FALSE
110	23	4.18802	3.56286	FALSE
110	24	4.21817	3.56286	FALSE
110	25	4.24301	3.56286	FALSE
110	26	4.27568	3.56286	FALSE
110	27	4.31164	3.56286	FALSE
110	28	4.35837	3.56286	FALSE
110	30	3.13032	3.56286	TRUE
110	37	3.08769	3.56286	TRUE
110	38	3.09486	3.56286	TRUE
113	28	4.51304	3.61237	TRUE
90	28	3.81048	3.06108	TRUE
110	28	4.35837	3.56286	TRUE
29	1	2.92942	2.97068	FALSE
29	2	2.97068	2.97068	FALSE
29	3	2.99147	2.97068	FALSE
29	4	2.99271	2.97068	FALSE
29	5	3.01895	2.97068	FALSE
29	6	3.04373	2.97068	FALSE
29	7	3.05915	2.97068	FALSE
29	8	3.0782	2.97068	FALSE
29	9	3.09138	2.97068	FALSE
29	10	3.11987	2.97068	FALSE
29	11	3.15057	2.97068	FALSE
29	12	3.15167	2.97068	FALSE
29	13	3.1773	2.97068	FALSE
29	14	3.20258	2.97068	FALSE
29	15	3.24692	2.97068	FALSE
29	16	3.28163	2.97068	FALSE
29	17	3.30699	2.97068	FALSE
29	18	3.33063	2.97068	FALSE
29	19	3.35755	2.97068	FALSE
29	20	3.39069	2.97068	FALSE
29	21	3.43131	2.97068	FALSE
29	22	3.45519	2.97068	FALSE
29	23	3.47819	2.97068	FALSE
29	24	3.50551	2.97068	FALSE
29	25	3.52621	2.97068	FALSE
29	26	3.56336	2.97068	FALSE
29	27	3.5721	2.97068	FALSE
29	28	3.57872	2.97068	FALSE
29	29	3.61219	2.97068	FALSE
29	30	3.64555	2.97068	FALSE
29	31	3.62439	2.97068	TRUE
29	32	3.63684	2.97068	TRUE
29	33	3.63679	2.97068	TRUE
29	34	3.65803	2.97068	TRUE
29	35	3.67498	2.97068	TRUE
29	36	3.70024	2.97068	TRUE
29	37	3.72541	2.97068	TRUE
29	38	3.74358	2.97068	TRUE
29	39	3.7632	2.97068	TRUE
29	40	3.77746	2.97068	TRUE
29	41	3.79596	2.97068	TRUE
29	42	3.80009	2.97068	TRUE
29	43	3.79956	2.97068	TRUE
29	44	3.82484	2.97068	TRUE
29	45	3.83037	2.97068	TRUE
29	46	3.84639	2.97068	TRUE
29	47	3.85906	2.97068	TRUE
29	48	3.86663	2.97068	TRUE
29	49	3.87129	2.97068	TRUE
29	50	3.8881	2.97068	TRUE
29	51	3.87419	2.97068	TRUE
29	52	3.85679	2.97068	TRUE
29	53	3.8597	2.97068	TRUE
29	54	3.86908	2.97068	TRUE
29	55	3.87415	2.97068	TRUE
29	56	3.87973	2.97068	TRUE
29	57	3.59024	2.97068	TRUE
29	58	2.97941	2.97068	TRUE
29	59	2.88689	2.97068	TRUE
29	60	2.80633	2.97068	TRUE
29	61	2.73623	2.97068	TRUE
61	1	3.77337	3.80854	FALSE
61	2	3.80854	3.80854	FALSE
61	3	3.84913	3.80854	FALSE
61	4	3.87491	3.80854	FALSE
61	5	3.91461	3.80854	FALSE
61	6	3.94928	3.80854	FALSE
61	7	3.98402	3.80854	FALSE
61	8	4.01849	3.80854	FALSE
61	9	4.05172	3.80854	FALSE
61	10	4.07274	3.80854	FALSE
61	11	4.10138	3.80854	FALSE
61	12	4.1393	3.80854	FALSE
61	13	4.18586	3.80854	FALSE
61	14	4.2149	3.80854	FALSE
61	15	4.2635	3.80854	FALSE
61	16	4.28014	3.80854	FALSE
61	17	4.31977	3.80854	FALSE
61	18	4.34823	3.80854	FALSE
61	19	4.38439	3.80854	FALSE
61	20	4.40721	3.80854	FALSE
61	21	4.44173	3.80854	FALSE
61	22	4.46426	3.80854	FALSE
61	23	4.50746	3.80854	FALSE
61	24	4.52402	3.80854	FALSE
61	25	4.54773	3.80854	FALSE
61	26	4.56596	3.80854	FALSE
61	27	4.59324	3.80854	FALSE
61	28	4.62289	3.80854	FALSE
61	29	4.64346	3.80854	FALSE
61	30	4.67792	3.80854	FALSE
61	31	3.80836	3.80854	TRUE
61	35	3.68259	3.80854	TRUE
61	36	3.67401	3.80854	TRUE
61	37	3.68237	3.80854	TRUE
61	38	3.67061	3.80854	TRUE
61	39	3.68577	3.80854	TRUE
61	40	3.66279	3.80854	TRUE
61	42	3.67292	3.80854	TRUE
61	43	3.68744	3.80854	TRUE
61	44	3.67569	3.80854	TRUE
61	49	3.68014	3.80854	TRUE
61	50	3.65728	3.80854	TRUE
61	51	3.6611	3.80854	TRUE
61	54	3.67804	3.80854	TRUE
61	56	3.66003	3.80854	TRUE
100	1	2.79664	2.81731	FALSE
100	2	2.81731	2.81731	FALSE
100	3	2.83444	2.81731	FALSE
100	4	2.85065	2.81731	FALSE
100	5	2.87463	2.81731	FALSE
100	6	2.9005	2.81731	FALSE
100	7	2.9237	2.81731	FALSE
100	8	2.95109	2.81731	FALSE
100	9	2.99184	2.81731	FALSE
100	10	3.0202	2.81731	FALSE
100	11	3.03411	2.81731	FALSE
100	12	3.05445	2.81731	FALSE
100	13	3.06973	2.81731	FALSE
100	14	3.07474	2.81731	FALSE
100	15	3.1125	2.81731	FALSE
100	16	3.13144	2.81731	FALSE
100	17	3.16537	2.81731	FALSE
100	18	3.17528	2.81731	FALSE
100	19	3.20641	2.81731	FALSE
100	20	3.22713	2.81731	FALSE
100	21	3.25877	2.81731	FALSE
100	22	3.26922	2.81731	FALSE
100	23	3.28078	2.81731	FALSE
100	24	3.30612	2.81731	FALSE
100	25	3.32905	2.81731	FALSE
100	26	3.35616	2.81731	FALSE
100	27	3.38768	2.81731	FALSE
100	28	3.41737	2.81731	FALSE
100	29	3.43536	2.81731	FALSE
100	30	3.43979	2.81731	FALSE
100	31	2.81377	2.81731	TRUE
100	32	2.64395	2.81731	TRUE
100	33	2.52294	2.81731	TRUE
100	34	2.34445	2.81731	TRUE
100	42	2.22534	2.81731	TRUE
100	43	2.24076	2.81731	TRUE
100	45	2.2749	2.81731	TRUE
100	46	2.31147	2.81731	TRUE
100	47	2.3019	2.81731	TRUE
100	48	2.32215	2.81731	TRUE
100	49	2.33056	2.81731	TRUE
100	50	2.3235	2.81731	TRUE
100	51	2.33198	2.81731	TRUE
29	30	3.64555	2.97068	TRUE
61	30	4.67792	3.80854	TRUE
100	30	3.43979	2.81731	TRUE
17	1	3.30691	3.3386	FALSE
17	2	3.3386	3.3386	FALSE
17	3	3.3699	3.3386	FALSE
17	4	3.39239	3.3386	FALSE
17	5	3.42335	3.3386	FALSE
17	6	3.4596	3.3386	FALSE
17	7	3.49532	3.3386	FALSE
17	8	3.53804	3.3386	FALSE
17	9	3.57556	3.3386	FALSE
17	10	3.61245	3.3386	FALSE
17	11	3.65053	3.3386	FALSE
17	12	3.68928	3.3386	FALSE
17	13	3.7192	3.3386	FALSE
17	14	3.75905	3.3386	FALSE
17	15	3.78575	3.3386	FALSE
17	16	3.82258	3.3386	FALSE
17	17	3.84071	3.3386	FALSE
17	18	3.87543	3.3386	FALSE
17	19	3.91606	3.3386	FALSE
17	20	3.95071	3.3386	FALSE
17	21	3.96972	3.3386	FALSE
17	22	4.01258	3.3386	FALSE
17	23	4.03436	3.3386	FALSE
17	24	4.07165	3.3386	FALSE
17	25	4.10975	3.3386	FALSE
17	26	4.12509	3.3386	FALSE
17	27	4.1513	3.3386	FALSE
17	28	4.16051	3.3386	FALSE
17	29	4.19647	3.3386	FALSE
17	30	4.22177	3.3386	FALSE
17	31	4.24681	3.3386	FALSE
17	32	4.18661	3.3386	TRUE
17	33	4.19949	3.3386	TRUE
17	34	4.20525	3.3386	TRUE
17	35	4.22369	3.3386	TRUE
17	36	4.23311	3.3386	TRUE
17	37	4.24723	3.3386	TRUE
17	38	4.23959	3.3386	TRUE
17	39	4.24307	3.3386	TRUE
17	40	4.19123	3.3386	TRUE
17	41	4.14964	3.3386	TRUE
17	42	4.10196	3.3386	TRUE
54	1	3.64576	3.6494	FALSE
54	2	3.6494	3.6494	FALSE
54	3	3.67988	3.6494	FALSE
54	4	3.71325	3.6494	FALSE
54	5	3.73192	3.6494	FALSE
54	6	3.76274	3.6494	FALSE
54	7	3.79131	3.6494	FALSE
54	8	3.80193	3.6494	FALSE
54	9	3.81682	3.6494	FALSE
54	10	3.84507	3.6494	FALSE
54	11	3.8818	3.6494	FALSE
54	12	3.91289	3.6494	FALSE
54	13	3.93308	3.6494	FALSE
54	14	3.95987	3.6494	FALSE
54	15	3.99904	3.6494	FALSE
54	16	4.02384	3.6494	FALSE
54	17	4.05675	3.6494	FALSE
54	18	4.08962	3.6494	FALSE
54	19	4.12406	3.6494	FALSE
54	20	4.15022	3.6494	FALSE
54	21	4.20352	3.6494	FALSE
54	22	4.24469	3.6494	FALSE
54	23	4.26033	3.6494	FALSE
54	24	4.29993	3.6494	FALSE
54	25	4.33846	3.6494	FALSE
54	26	4.35961	3.6494	FALSE
54	27	4.40057	3.6494	FALSE
54	28	4.43013	3.6494	FALSE
54	29	4.45521	3.6494	FALSE
54	30	4.48966	3.6494	FALSE
54	31	4.50659	3.6494	FALSE
54	32	4.16696	3.6494	TRUE
54	33	4.08641	3.6494	TRUE
54	34	4.07571	3.6494	TRUE
54	35	4.04581	3.6494	TRUE
54	36	4.02027	3.6494	TRUE
54	38	3.93343	3.6494	TRUE
54	40	3.89919	3.6494	TRUE
54	41	3.89063	3.6494	TRUE
54	42	3.88431	3.6494	TRUE
54	45	3.83325	3.6494	TRUE
54	46	3.81421	3.6494	TRUE
54	47	3.80144	3.6494	TRUE
54	48	3.79808	3.6494	TRUE
54	49	3.77409	3.6494	TRUE
54	50	3.78027	3.6494	TRUE
54	51	3.77003	3.6494	TRUE
54	52	3.75554	3.6494	TRUE
54	53	3.74933	3.6494	TRUE
54	54	3.73001	3.6494	TRUE
54	55	3.71519	3.6494	TRUE
54	56	3.70039	3.6494	TRUE
54	60	3.68966	3.6494	TRUE
17	31	4.24681	3.3386	TRUE
54	31	4.50659	3.6494	TRUE
30	1	3.8265	3.86828	FALSE
30	2	3.86828	3.86828	FALSE
30	3	3.89214	3.86828	FALSE
30	4	3.93893	3.86828	FALSE
30	5	3.96856	3.86828	FALSE
30	6	4.00153	3.86828	FALSE
30	7	4.02581	3.86828	FALSE
30	8	4.07177	3.86828	FALSE
30	9	4.10379	3.86828	FALSE
30	10	4.12266	3.86828	FALSE
30	11	4.15276	3.86828	FALSE
30	12	4.1944	3.86828	FALSE
30	13	4.22764	3.86828	FALSE
30	14	4.24765	3.86828	FALSE
30	15	4.27941	3.86828	FALSE
30	16	4.30353	3.86828	FALSE
30	17	4.32497	3.86828	FALSE
30	18	4.36027	3.86828	FALSE
30	19	4.40256	3.86828	FALSE
30	20	4.43434	3.86828	FALSE
30	21	4.47167	3.86828	FALSE
30	22	4.50198	3.86828	FALSE
30	23	4.5409	3.86828	FALSE
30	24	4.59177	3.86828	FALSE
30	25	4.63826	3.86828	FALSE
30	26	4.6785	3.86828	FALSE
30	27	4.69965	3.86828	FALSE
30	28	4.71911	3.86828	FALSE
30	29	4.75676	3.86828	FALSE
30	30	4.78817	3.86828	FALSE
30	31	4.8257	3.86828	FALSE
30	32	4.86534	3.86828	FALSE
30	33	4.58272	3.86828	TRUE
30	34	4.44463	3.86828	TRUE
30	35	4.32855	3.86828	TRUE
30	36	4.20127	3.86828	TRUE
30	37	4.18388	3.86828	TRUE
30	38	4.1531	3.86828	TRUE
30	39	4.09702	3.86828	TRUE
30	40	4.09405	3.86828	TRUE
30	41	4.04586	3.86828	TRUE
30	42	4.03648	3.86828	TRUE
30	43	4.00308	3.86828	TRUE
30	44	3.99228	3.86828	TRUE
30	45	3.96194	3.86828	TRUE
30	46	3.94772	3.86828	TRUE
30	47	3.93622	3.86828	TRUE
30	48	3.91869	3.86828	TRUE
30	49	3.83388	3.86828	TRUE
30	50	3.75727	3.86828	TRUE
30	51	3.70704	3.86828	TRUE
30	52	3.70176	3.86828	TRUE
30	53	3.68071	3.86828	TRUE
30	54	3.66341	3.86828	TRUE
30	55	3.65181	3.86828	TRUE
30	56	3.62775	3.86828	TRUE
30	57	3.61243	3.86828	TRUE
30	58	3.59883	3.86828	TRUE
30	59	3.57966	3.86828	TRUE
30	60	3.56878	3.86828	TRUE
30	61	3.54306	3.86828	TRUE
30	32	4.86534	3.86828	TRUE
128	1	3.76994	3.80724	FALSE
128	2	3.80724	3.80724	FALSE
128	3	3.83935	3.80724	FALSE
128	4	3.85591	3.80724	FALSE
128	5	3.88778	3.80724	FALSE
128	6	3.92308	3.80724	FALSE
128	7	3.95294	3.80724	FALSE
128	8	3.98064	3.80724	FALSE
128	9	4.01852	3.80724	FALSE
128	10	4.04962	3.80724	FALSE
128	11	4.08297	3.80724	FALSE
128	12	4.12709	3.80724	FALSE
128	13	4.16696	3.80724	FALSE
128	14	4.21448	3.80724	FALSE
128	15	4.25801	3.80724	FALSE
128	16	4.29942	3.80724	FALSE
128	17	4.31941	3.80724	FALSE
128	18	4.35337	3.80724	FALSE
128	19	4.39617	3.80724	FALSE
128	20	4.42185	3.80724	FALSE
128	21	4.46913	3.80724	FALSE
128	22	4.52347	3.80724	FALSE
128	23	4.56612	3.80724	FALSE
128	24	4.62341	3.80724	FALSE
128	25	4.65444	3.80724	FALSE
128	26	4.69704	3.80724	FALSE
128	27	4.71668	3.80724	FALSE
128	28	4.7648	3.80724	FALSE
128	29	4.797	3.80724	FALSE
128	30	4.83191	3.80724	FALSE
128	31	4.88534	3.80724	FALSE
128	32	4.9067	3.80724	FALSE
128	33	4.96633	3.80724	FALSE
128	34	4.7855	3.80724	TRUE
128	35	4.63181	3.80724	TRUE
128	36	4.49234	3.80724	TRUE
128	37	4.43035	3.80724	TRUE
128	38	4.35176	3.80724	TRUE
128	39	4.22219	3.80724	TRUE
28	1	3.22515	3.26818	FALSE
28	2	3.26818	3.26818	FALSE
28	3	3.29864	3.26818	FALSE
28	4	3.32223	3.26818	FALSE
28	5	3.34552	3.26818	FALSE
28	6	3.38064	3.26818	FALSE
28	7	3.41456	3.26818	FALSE
28	8	3.44711	3.26818	FALSE
28	9	3.48412	3.26818	FALSE
28	10	3.50537	3.26818	FALSE
28	11	3.53659	3.26818	FALSE
28	12	3.55727	3.26818	FALSE
28	13	3.57003	3.26818	FALSE
28	14	3.58198	3.26818	FALSE
28	15	3.61026	3.26818	FALSE
28	16	3.64285	3.26818	FALSE
28	17	3.66317	3.26818	FALSE
28	18	3.7038	3.26818	FALSE
28	19	3.72803	3.26818	FALSE
28	20	3.75233	3.26818	FALSE
28	21	3.75208	3.26818	FALSE
28	22	3.78508	3.26818	FALSE
28	23	3.8151	3.26818	FALSE
28	24	3.86064	3.26818	FALSE
28	25	3.90191	3.26818	FALSE
28	26	3.93378	3.26818	FALSE
28	27	3.9548	3.26818	FALSE
28	28	3.98879	3.26818	FALSE
28	29	4.03126	3.26818	FALSE
28	30	4.0611	3.26818	FALSE
28	31	4.09395	3.26818	FALSE
28	32	4.13011	3.26818	FALSE
28	33	4.14315	3.26818	FALSE
28	34	3.9551	3.26818	TRUE
28	35	3.83259	3.26818	TRUE
28	36	3.72979	3.26818	TRUE
28	37	3.63314	3.26818	TRUE
28	38	3.55916	3.26818	TRUE
28	39	3.491	3.26818	TRUE
28	40	3.43299	3.26818	TRUE
28	41	3.39983	3.26818	TRUE
28	42	3.36843	3.26818	TRUE
28	43	3.36137	3.26818	TRUE
28	44	3.33387	3.26818	TRUE
28	45	3.55378	3.26818	TRUE
28	46	3.51946	3.26818	TRUE
28	47	3.48949	3.26818	TRUE
28	48	3.48077	3.26818	TRUE
28	49	3.45997	3.26818	TRUE
28	50	3.48646	3.26818	TRUE
28	52	3.46468	3.26818	TRUE
28	53	3.47867	3.26818	TRUE
28	55	3.44511	3.26818	TRUE
28	56	3.42505	3.26818	TRUE
28	57	3.44253	3.26818	TRUE
28	58	3.44405	3.26818	TRUE
28	60	3.42771	3.26818	TRUE
98	1	3.30879	3.35155	FALSE
98	2	3.35155	3.35155	FALSE
98	3	3.39755	3.35155	FALSE
98	4	3.4232	3.35155	FALSE
98	5	3.45343	3.35155	FALSE
98	6	3.51608	3.35155	FALSE
98	7	3.54977	3.35155	FALSE
98	8	3.57144	3.35155	FALSE
98	9	3.61256	3.35155	FALSE
98	10	3.64846	3.35155	FALSE
98	11	3.68674	3.35155	FALSE
98	12	3.71399	3.35155	FALSE
98	13	3.74529	3.35155	FALSE
98	14	3.77729	3.35155	FALSE
98	15	3.8066	3.35155	FALSE
98	16	3.83226	3.35155	FALSE
98	17	3.86218	3.35155	FALSE
98	18	3.89794	3.35155	FALSE
98	19	3.93737	3.35155	FALSE
98	20	3.99132	3.35155	FALSE
98	21	4.00632	3.35155	FALSE
98	22	4.05873	3.35155	FALSE
98	23	4.07438	3.35155	FALSE
98	24	4.14162	3.35155	FALSE
98	25	4.16891	3.35155	FALSE
98	26	4.19758	3.35155	FALSE
98	27	4.22541	3.35155	FALSE
98	28	4.25148	3.35155	FALSE
98	29	4.27782	3.35155	FALSE
98	30	4.3162	3.35155	FALSE
98	31	4.34726	3.35155	FALSE
98	32	4.36751	3.35155	FALSE
98	33	4.39699	3.35155	FALSE
98	34	4.33926	3.35155	TRUE
98	35	4.35408	3.35155	TRUE
98	36	4.20858	3.35155	TRUE
98	37	4.18068	3.35155	TRUE
98	38	4.13853	3.35155	TRUE
98	39	4.08949	3.35155	TRUE
98	40	4.05888	3.35155	TRUE
98	41	4.02354	3.35155	TRUE
98	42	4.01113	3.35155	TRUE
98	43	3.97879	3.35155	TRUE
98	44	3.94948	3.35155	TRUE
98	45	3.85665	3.35155	TRUE
98	46	3.71754	3.35155	TRUE
98	47	3.64936	3.35155	TRUE
98	48	3.59762	3.35155	TRUE
98	49	3.58659	3.35155	TRUE
98	50	3.56155	3.35155	TRUE
98	51	3.43291	3.35155	TRUE
98	52	3.37933	3.35155	TRUE
98	53	3.37713	3.35155	TRUE
98	54	3.32559	3.35155	TRUE
98	55	3.3037	3.35155	TRUE
98	56	3.30742	3.35155	TRUE
98	57	3.2955	3.35155	TRUE
98	60	3.26548	3.35155	TRUE
128	33	4.96633	3.80724	TRUE
28	33	4.14315	3.26818	TRUE
98	33	4.39699	3.35155	TRUE
65	1	3.26693	3.26919	FALSE
65	2	3.26919	3.26919	FALSE
65	3	3.33854	3.26919	FALSE
65	4	3.35912	3.26919	FALSE
65	5	3.38787	3.26919	FALSE
65	6	3.40592	3.26919	FALSE
65	7	3.43481	3.26919	FALSE
65	8	3.49025	3.26919	FALSE
65	9	3.51933	3.26919	FALSE
65	10	3.54798	3.26919	FALSE
65	11	3.57561	3.26919	FALSE
65	12	3.6026	3.26919	FALSE
65	13	3.6278	3.26919	FALSE
65	14	3.6399	3.26919	FALSE
65	15	3.67461	3.26919	FALSE
65	16	3.69224	3.26919	FALSE
65	17	3.7263	3.26919	FALSE
65	18	3.76523	3.26919	FALSE
65	19	3.80793	3.26919	FALSE
65	20	3.81894	3.26919	FALSE
65	21	3.82663	3.26919	FALSE
65	22	3.86462	3.26919	FALSE
65	23	3.87875	3.26919	FALSE
65	24	3.89094	3.26919	FALSE
65	25	3.9468	3.26919	FALSE
65	26	3.9573	3.26919	FALSE
65	27	3.98904	3.26919	FALSE
65	28	4.01337	3.26919	FALSE
65	29	4.03792	3.26919	FALSE
65	30	4.05672	3.26919	FALSE
65	31	4.0796	3.26919	FALSE
65	32	4.08541	3.26919	FALSE
65	33	4.08377	3.26919	FALSE
65	34	4.11579	3.26919	FALSE
65	35	4.13647	3.26919	FALSE
65	36	3.34532	3.26919	TRUE
65	37	3.54855	3.26919	TRUE
65	39	3.64057	3.26919	TRUE
65	40	3.54315	3.26919	TRUE
65	41	3.52633	3.26919	TRUE
65	42	3.50006	3.26919	TRUE
65	43	3.49893	3.26919	TRUE
65	44	3.46626	3.26919	TRUE
65	45	3.42931	3.26919	TRUE
65	46	3.37003	3.26919	TRUE
65	47	3.34939	3.26919	TRUE
65	48	3.34342	3.26919	TRUE
65	49	3.3346	3.26919	TRUE
65	50	3.33085	3.26919	TRUE
65	51	3.33948	3.26919	TRUE
65	52	3.32725	3.26919	TRUE
65	53	3.33805	3.26919	TRUE
65	54	3.32792	3.26919	TRUE
65	55	3.32394	3.26919	TRUE
65	56	3.3	3.26919	TRUE
65	57	3.30698	3.26919	TRUE
65	58	3.31905	3.26919	TRUE
65	59	3.32055	3.26919	TRUE
65	60	3.30902	3.26919	TRUE
65	61	3.29308	3.26919	TRUE
65	35	4.13647	3.26919	TRUE
81	1	3.69996	3.71642	FALSE
81	2	3.71642	3.71642	FALSE
81	3	3.74325	3.71642	FALSE
81	4	3.77085	3.71642	FALSE
81	5	3.78857	3.71642	FALSE
81	6	3.82076	3.71642	FALSE
81	7	3.84545	3.71642	FALSE
81	8	3.88388	3.71642	FALSE
81	9	3.93371	3.71642	FALSE
81	10	3.97847	3.71642	FALSE
81	11	4.03282	3.71642	FALSE
81	12	4.06632	3.71642	FALSE
81	13	4.10003	3.71642	FALSE
81	14	4.13416	3.71642	FALSE
81	15	4.17463	3.71642	FALSE
81	16	4.21524	3.71642	FALSE
81	17	4.25289	3.71642	FALSE
81	18	4.27182	3.71642	FALSE
81	19	4.31068	3.71642	FALSE
81	20	4.3343	3.71642	FALSE
81	21	4.35313	3.71642	FALSE
81	22	4.3691	3.71642	FALSE
81	23	4.38404	3.71642	FALSE
81	24	4.40516	3.71642	FALSE
81	25	4.43268	3.71642	FALSE
81	26	4.46538	3.71642	FALSE
81	27	4.49182	3.71642	FALSE
81	28	4.51452	3.71642	FALSE
81	29	4.55136	3.71642	FALSE
81	30	4.56465	3.71642	FALSE
81	31	4.59663	3.71642	FALSE
81	32	4.6274	3.71642	FALSE
81	33	4.64637	3.71642	FALSE
81	34	4.68629	3.71642	FALSE
81	35	4.71744	3.71642	FALSE
81	36	4.75099	3.71642	FALSE
81	37	4.24334	3.71642	TRUE
81	38	3.9926	3.71642	TRUE
81	39	3.99736	3.71642	TRUE
81	40	4.0523	3.71642	TRUE
81	41	4.05393	3.71642	TRUE
81	42	4.2469	3.71642	TRUE
81	43	3.85929	3.71642	TRUE
81	44	3.8024	3.71642	TRUE
81	45	3.76515	3.71642	TRUE
81	47	3.6773	3.71642	TRUE
81	48	3.62179	3.71642	TRUE
81	49	3.60199	3.71642	TRUE
81	50	3.56109	3.71642	TRUE
70	1	2.90391	2.92615	FALSE
70	2	2.92615	2.92615	FALSE
70	3	2.94877	2.92615	FALSE
70	4	2.96464	2.92615	FALSE
70	5	2.97974	2.92615	FALSE
70	6	3.00631	2.92615	FALSE
70	7	3.01185	2.92615	FALSE
70	8	3.02937	2.92615	FALSE
70	9	3.06071	2.92615	FALSE
70	10	3.06797	2.92615	FALSE
70	11	3.08932	2.92615	FALSE
70	12	3.10659	2.92615	FALSE
70	13	3.13341	2.92615	FALSE
70	14	3.14462	2.92615	FALSE
70	15	3.15892	2.92615	FALSE
70	16	3.17481	2.92615	FALSE
70	17	3.18758	2.92615	FALSE
70	18	3.21554	2.92615	FALSE
70	19	3.23285	2.92615	FALSE
70	20	3.26913	2.92615	FALSE
70	21	3.26515	2.92615	FALSE
70	22	3.29342	2.92615	FALSE
70	23	3.32723	2.92615	FALSE
70	24	3.34615	2.92615	FALSE
70	25	3.35318	2.92615	FALSE
70	26	3.38348	2.92615	FALSE
70	27	3.3982	2.92615	FALSE
70	28	3.4214	2.92615	FALSE
70	29	3.44312	2.92615	FALSE
70	30	3.45231	2.92615	FALSE
70	31	3.45778	2.92615	FALSE
70	32	3.47418	2.92615	FALSE
70	33	3.48142	2.92615	FALSE
70	34	3.49138	2.92615	FALSE
70	35	3.51493	2.92615	FALSE
70	36	3.529	2.92615	FALSE
70	37	3.52163	2.92615	TRUE
70	38	3.54106	2.92615	TRUE
70	39	3.54875	2.92615	TRUE
70	40	3.55078	2.92615	TRUE
70	41	3.56637	2.92615	TRUE
70	42	3.58129	2.92615	TRUE
70	43	3.58529	2.92615	TRUE
70	44	3.60064	2.92615	TRUE
70	45	3.6098	2.92615	TRUE
70	46	3.61111	2.92615	TRUE
70	47	3.61992	2.92615	TRUE
70	48	3.63215	2.92615	TRUE
70	49	3.64125	2.92615	TRUE
70	50	3.65416	2.92615	TRUE
70	51	3.66975	2.92615	TRUE
70	52	3.67146	2.92615	TRUE
70	53	3.67972	2.92615	TRUE
79	1	3.92909	3.94766	FALSE
79	2	3.94766	3.94766	FALSE
79	3	3.97767	3.94766	FALSE
79	4	3.99816	3.94766	FALSE
79	5	4.05041	3.94766	FALSE
79	6	4.07156	3.94766	FALSE
79	7	4.09295	3.94766	FALSE
79	8	4.1337	3.94766	FALSE
79	9	4.16854	3.94766	FALSE
79	10	4.21207	3.94766	FALSE
79	11	4.24529	3.94766	FALSE
79	12	4.295	3.94766	FALSE
79	13	4.34167	3.94766	FALSE
79	14	4.38456	3.94766	FALSE
79	15	4.42328	3.94766	FALSE
79	16	4.47053	3.94766	FALSE
79	17	4.5063	3.94766	FALSE
79	18	4.54686	3.94766	FALSE
79	19	4.57816	3.94766	FALSE
79	20	4.6268	3.94766	FALSE
79	21	4.66636	3.94766	FALSE
79	22	4.69312	3.94766	FALSE
79	23	4.72264	3.94766	FALSE
79	24	4.75759	3.94766	FALSE
79	25	4.76837	3.94766	FALSE
79	26	4.79369	3.94766	FALSE
79	27	4.84655	3.94766	FALSE
79	28	4.88543	3.94766	FALSE
79	29	4.92497	3.94766	FALSE
79	30	4.94342	3.94766	FALSE
79	31	4.96462	3.94766	FALSE
79	32	5.01893	3.94766	FALSE
79	33	5.04976	3.94766	FALSE
79	34	5.09684	3.94766	FALSE
79	35	5.14439	3.94766	FALSE
79	36	5.17049	3.94766	FALSE
79	37	4.77368	3.94766	TRUE
79	38	4.70655	3.94766	TRUE
79	39	4.55131	3.94766	TRUE
79	40	4.43955	3.94766	TRUE
79	41	4.33747	3.94766	TRUE
79	42	4.27663	3.94766	TRUE
79	43	4.22942	3.94766	TRUE
79	44	4.10929	3.94766	TRUE
79	46	4.02583	3.94766	TRUE
79	52	3.85141	3.94766	TRUE
79	53	3.83267	3.94766	TRUE
94	1	2.70192	2.71374	FALSE
94	2	2.71374	2.71374	FALSE
94	3	2.7236	2.71374	FALSE
94	4	2.74518	2.71374	FALSE
94	5	2.75034	2.71374	FALSE
94	6	2.7789	2.71374	FALSE
94	7	2.78641	2.71374	FALSE
94	8	2.81511	2.71374	FALSE
94	9	2.83454	2.71374	FALSE
94	10	2.84529	2.71374	FALSE
94	11	2.86889	2.71374	FALSE
94	12	2.8794	2.71374	FALSE
94	13	2.91013	2.71374	FALSE
94	14	2.92814	2.71374	FALSE
94	15	2.94793	2.71374	FALSE
94	16	2.94957	2.71374	FALSE
94	17	2.97598	2.71374	FALSE
94	18	3.00266	2.71374	FALSE
94	19	3.0267	2.71374	FALSE
94	20	3.04781	2.71374	FALSE
94	21	3.06035	2.71374	FALSE
94	22	3.07528	2.71374	FALSE
94	23	3.09409	2.71374	FALSE
94	24	3.12822	2.71374	FALSE
94	25	3.14011	2.71374	FALSE
94	26	3.16858	2.71374	FALSE
94	27	3.16981	2.71374	FALSE
94	28	3.20528	2.71374	FALSE
94	29	3.231	2.71374	FALSE
94	30	3.26167	2.71374	FALSE
94	31	3.28533	2.71374	FALSE
94	32	3.31328	2.71374	FALSE
94	33	3.32839	2.71374	FALSE
94	34	3.34327	2.71374	FALSE
94	35	3.35007	2.71374	FALSE
94	36	3.36733	2.71374	FALSE
94	37	3.3592	2.71374	TRUE
94	38	3.36029	2.71374	TRUE
94	39	3.10636	2.71374	TRUE
94	40	3.02631	2.71374	TRUE
94	41	2.89182	2.71374	TRUE
94	42	2.84218	2.71374	TRUE
94	43	2.81342	2.71374	TRUE
94	44	2.7859	2.71374	TRUE
94	45	2.77493	2.71374	TRUE
94	46	2.75497	2.71374	TRUE
94	47	2.74576	2.71374	TRUE
94	48	2.72849	2.71374	TRUE
94	49	2.73655	2.71374	TRUE
94	50	2.72848	2.71374	TRUE
94	51	2.72455	2.71374	TRUE
94	52	2.71583	2.71374	TRUE
94	53	2.71166	2.71374	TRUE
94	54	2.71041	2.71374	TRUE
94	55	2.7085	2.71374	TRUE
94	56	2.71297	2.71374	TRUE
94	57	2.69411	2.71374	TRUE
94	58	2.68039	2.71374	TRUE
94	59	2.70282	2.71374	TRUE
94	60	2.67875	2.71374	TRUE
94	61	2.68524	2.71374	TRUE
81	36	4.75099	3.71642	TRUE
70	36	3.529	2.92615	TRUE
79	36	5.17049	3.94766	TRUE
94	36	3.36733	2.71374	TRUE
118	1	3.20291	3.22561	FALSE
118	2	3.22561	3.22561	FALSE
118	3	3.23857	3.22561	FALSE
118	4	3.26629	3.22561	FALSE
118	5	3.27111	3.22561	FALSE
118	6	3.2974	3.22561	FALSE
118	7	3.32739	3.22561	FALSE
118	8	3.34668	3.22561	FALSE
118	9	3.37037	3.22561	FALSE
118	10	3.3689	3.22561	FALSE
118	11	3.39878	3.22561	FALSE
118	12	3.42859	3.22561	FALSE
118	13	3.44678	3.22561	FALSE
118	14	3.46523	3.22561	FALSE
118	15	3.46644	3.22561	FALSE
118	16	3.4927	3.22561	FALSE
118	17	3.52011	3.22561	FALSE
118	18	3.53372	3.22561	FALSE
118	19	3.53012	3.22561	FALSE
118	20	3.56259	3.22561	FALSE
118	21	3.58566	3.22561	FALSE
118	22	3.59926	3.22561	FALSE
118	23	3.61323	3.22561	FALSE
118	24	3.62743	3.22561	FALSE
118	25	3.6587	3.22561	FALSE
118	26	3.66662	3.22561	FALSE
118	27	3.68277	3.22561	FALSE
118	28	3.69057	3.22561	FALSE
118	29	3.70921	3.22561	FALSE
118	30	3.73358	3.22561	FALSE
118	31	3.7459	3.22561	FALSE
118	32	3.75222	3.22561	FALSE
118	33	3.76653	3.22561	FALSE
118	34	3.78162	3.22561	FALSE
118	35	3.80254	3.22561	FALSE
118	36	3.80803	3.22561	FALSE
118	37	3.81957	3.22561	FALSE
118	38	3.80978	3.22561	TRUE
118	39	3.83267	3.22561	TRUE
118	40	3.81657	3.22561	TRUE
118	41	3.84859	3.22561	TRUE
118	42	3.86524	3.22561	TRUE
118	43	3.87267	3.22561	TRUE
118	44	3.87927	3.22561	TRUE
118	45	3.88548	3.22561	TRUE
118	46	3.9076	3.22561	TRUE
118	47	3.91035	3.22561	TRUE
118	48	3.92177	3.22561	TRUE
118	49	3.93052	3.22561	TRUE
118	50	3.93811	3.22561	TRUE
118	51	3.94837	3.22561	TRUE
118	52	3.96271	3.22561	TRUE
118	53	3.97075	3.22561	TRUE
118	54	3.9864	3.22561	TRUE
118	55	3.99828	3.22561	TRUE
118	56	4.01055	3.22561	TRUE
118	57	4.00382	3.22561	TRUE
118	58	4.0094	3.22561	TRUE
118	59	4.03656	3.22561	TRUE
118	60	4.02308	3.22561	TRUE
118	61	4.03919	3.22561	TRUE
85	1	3.45236	3.47162	FALSE
85	2	3.47162	3.47162	FALSE
85	3	3.48693	3.47162	FALSE
85	4	3.52258	3.47162	FALSE
85	5	3.56142	3.47162	FALSE
85	6	3.58236	3.47162	FALSE
85	7	3.60919	3.47162	FALSE
85	8	3.64245	3.47162	FALSE
85	9	3.65892	3.47162	FALSE
85	10	3.67675	3.47162	FALSE
85	11	3.71043	3.47162	FALSE
85	12	3.72772	3.47162	FALSE
85	13	3.76694	3.47162	FALSE
85	14	3.77809	3.47162	FALSE
85	15	3.81072	3.47162	FALSE
85	16	3.83571	3.47162	FALSE
85	17	3.86524	3.47162	FALSE
85	18	3.88982	3.47162	FALSE
85	19	3.90656	3.47162	FALSE
85	20	3.95757	3.47162	FALSE
85	21	3.98674	3.47162	FALSE
85	22	4.02107	3.47162	FALSE
85	23	4.05287	3.47162	FALSE
85	24	4.09026	3.47162	FALSE
85	25	4.11648	3.47162	FALSE
85	26	4.15239	3.47162	FALSE
85	27	4.16433	3.47162	FALSE
85	28	4.18514	3.47162	FALSE
85	29	4.21523	3.47162	FALSE
85	30	4.2481	3.47162	FALSE
85	31	4.2633	3.47162	FALSE
85	32	4.32018	3.47162	FALSE
85	33	4.33808	3.47162	FALSE
85	34	4.37136	3.47162	FALSE
85	35	4.40058	3.47162	FALSE
85	36	4.43736	3.47162	FALSE
85	37	4.46809	3.47162	FALSE
85	38	3.98641	3.47162	TRUE
85	39	3.74648	3.47162	TRUE
118	37	3.81957	3.22561	TRUE
85	37	4.46809	3.47162	TRUE
59	1	3.28914	3.30356	FALSE
59	2	3.30356	3.30356	FALSE
59	3	3.32356	3.30356	FALSE
59	4	3.35416	3.30356	FALSE
59	5	3.38761	3.30356	FALSE
59	6	3.41473	3.30356	FALSE
59	7	3.45549	3.30356	FALSE
59	8	3.47502	3.30356	FALSE
59	9	3.51143	3.30356	FALSE
59	10	3.54199	3.30356	FALSE
59	11	3.56693	3.30356	FALSE
59	12	3.57899	3.30356	FALSE
59	13	3.60625	3.30356	FALSE
59	14	3.61914	3.30356	FALSE
59	15	3.64936	3.30356	FALSE
59	16	3.70468	3.30356	FALSE
59	17	3.70887	3.30356	FALSE
59	18	3.74149	3.30356	FALSE
59	19	3.76	3.30356	FALSE
59	20	3.77583	3.30356	FALSE
59	21	3.80584	3.30356	FALSE
59	22	3.85346	3.30356	FALSE
59	23	3.89153	3.30356	FALSE
59	24	3.92315	3.30356	FALSE
59	25	3.94197	3.30356	FALSE
59	26	3.97395	3.30356	FALSE
59	27	4.01252	3.30356	FALSE
59	28	4.03946	3.30356	FALSE
59	29	4.07529	3.30356	FALSE
59	30	4.1019	3.30356	FALSE
59	31	4.13173	3.30356	FALSE
59	32	4.16176	3.30356	FALSE
59	33	4.19947	3.30356	FALSE
59	34	4.25662	3.30356	FALSE
59	35	4.3127	3.30356	FALSE
59	36	4.36193	3.30356	FALSE
59	37	4.37519	3.30356	FALSE
59	38	4.39623	3.30356	FALSE
59	39	3.76514	3.30356	TRUE
59	40	4.05111	3.30356	TRUE
59	41	3.96722	3.30356	TRUE
59	42	3.78747	3.30356	TRUE
59	43	3.69802	3.30356	TRUE
59	44	3.63035	3.30356	TRUE
59	45	3.61516	3.30356	TRUE
59	46	3.60149	3.30356	TRUE
59	47	3.57126	3.30356	TRUE
59	48	3.54324	3.30356	TRUE
59	49	3.54226	3.30356	TRUE
59	50	3.5509	3.30356	TRUE
59	51	3.56004	3.30356	TRUE
59	52	3.48102	3.30356	TRUE
59	54	3.45669	3.30356	TRUE
61	1	2.67977	2.67905	FALSE
61	2	2.67905	2.67905	FALSE
61	3	2.68933	2.67905	FALSE
61	4	2.71057	2.67905	FALSE
61	5	2.7289	2.67905	FALSE
61	6	2.74771	2.67905	FALSE
61	7	2.76477	2.67905	FALSE
61	8	2.78145	2.67905	FALSE
61	9	2.80362	2.67905	FALSE
61	10	2.82445	2.67905	FALSE
61	11	2.8271	2.67905	FALSE
61	12	2.83914	2.67905	FALSE
61	13	2.85608	2.67905	FALSE
61	14	2.85589	2.67905	FALSE
61	15	2.86854	2.67905	FALSE
61	16	2.88453	2.67905	FALSE
61	17	2.88418	2.67905	FALSE
61	18	2.91292	2.67905	FALSE
61	19	2.91561	2.67905	FALSE
61	20	2.95037	2.67905	FALSE
61	21	2.97114	2.67905	FALSE
61	22	2.99583	2.67905	FALSE
61	23	3.03186	2.67905	FALSE
61	24	3.05382	2.67905	FALSE
61	25	3.09774	2.67905	FALSE
61	26	3.11013	2.67905	FALSE
61	27	3.13232	2.67905	FALSE
61	28	3.15842	2.67905	FALSE
61	29	3.17688	2.67905	FALSE
61	30	3.19986	2.67905	FALSE
61	31	3.20206	2.67905	FALSE
61	32	3.23803	2.67905	FALSE
61	33	3.26758	2.67905	FALSE
61	34	3.2787	2.67905	FALSE
61	35	3.30379	2.67905	FALSE
61	36	3.31994	2.67905	FALSE
61	37	3.32777	2.67905	FALSE
61	38	3.33783	2.67905	FALSE
61	39	3.31829	2.67905	TRUE
61	40	3.32835	2.67905	TRUE
61	41	3.36791	2.67905	TRUE
61	42	3.36782	2.67905	TRUE
61	43	3.3952	2.67905	TRUE
61	44	3.41424	2.67905	TRUE
61	45	3.42886	2.67905	TRUE
61	46	3.45233	2.67905	TRUE
61	47	3.45733	2.67905	TRUE
61	48	3.44473	2.67905	TRUE
61	49	3.27594	2.67905	TRUE
61	50	3.02399	2.67905	TRUE
61	51	2.96487	2.67905	TRUE
61	52	2.92719	2.67905	TRUE
61	53	2.90323	2.67905	TRUE
61	54	2.8941	2.67905	TRUE
61	55	2.88093	2.67905	TRUE
61	56	2.88106	2.67905	TRUE
61	57	2.86395	2.67905	TRUE
61	58	2.85811	2.67905	TRUE
61	59	2.87909	2.67905	TRUE
61	60	2.85104	2.67905	TRUE
61	61	2.82354	2.67905	TRUE
59	38	4.39623	3.30356	TRUE
61	38	3.33783	2.67905	TRUE
134	1	3.04078	3.05318	FALSE
134	2	3.05318	3.05318	FALSE
134	3	3.07121	3.05318	FALSE
134	4	3.09271	3.05318	FALSE
134	5	3.10753	3.05318	FALSE
134	6	3.10859	3.05318	FALSE
134	7	3.11907	3.05318	FALSE
134	8	3.14178	3.05318	FALSE
134	9	3.15972	3.05318	FALSE
134	10	3.16799	3.05318	FALSE
134	11	3.19368	3.05318	FALSE
134	12	3.20341	3.05318	FALSE
134	13	3.22424	3.05318	FALSE
134	14	3.23115	3.05318	FALSE
134	15	3.25348	3.05318	FALSE
134	16	3.27489	3.05318	FALSE
134	17	3.30624	3.05318	FALSE
134	18	3.32511	3.05318	FALSE
134	19	3.34438	3.05318	FALSE
134	20	3.35929	3.05318	FALSE
134	21	3.36385	3.05318	FALSE
134	22	3.38812	3.05318	FALSE
134	23	3.40514	3.05318	FALSE
134	24	3.42008	3.05318	FALSE
134	25	3.44442	3.05318	FALSE
134	26	3.47175	3.05318	FALSE
134	27	3.51436	3.05318	FALSE
134	28	3.53534	3.05318	FALSE
134	29	3.56626	3.05318	FALSE
134	30	3.5885	3.05318	FALSE
134	31	3.60791	3.05318	FALSE
134	32	3.63037	3.05318	FALSE
134	33	3.65967	3.05318	FALSE
134	34	3.68451	3.05318	FALSE
134	35	3.71098	3.05318	FALSE
134	36	3.7224	3.05318	FALSE
134	37	3.75809	3.05318	FALSE
134	38	3.78738	3.05318	FALSE
134	39	3.81289	3.05318	FALSE
134	40	3.5951	3.05318	TRUE
134	41	3.50951	3.05318	TRUE
134	42	3.4321	3.05318	TRUE
134	43	3.32988	3.05318	TRUE
134	44	3.20579	3.05318	TRUE
134	45	3.2033	3.05318	TRUE
134	46	3.20777	3.05318	TRUE
134	47	3.22747	3.05318	TRUE
134	50	2.97538	3.05318	TRUE
134	51	2.93336	3.05318	TRUE
134	52	2.88209	3.05318	TRUE
134	53	2.85137	3.05318	TRUE
134	39	3.81289	3.05318	TRUE
134	1	3.94702	3.96744	FALSE
134	2	3.96744	3.96744	FALSE
134	3	3.97766	3.96744	FALSE
134	4	4.00504	3.96744	FALSE
134	5	4.02207	3.96744	FALSE
134	6	4.03543	3.96744	FALSE
134	7	4.07429	3.96744	FALSE
134	8	4.10698	3.96744	FALSE
134	9	4.12766	3.96744	FALSE
134	10	4.13851	3.96744	FALSE
134	11	4.15072	3.96744	FALSE
134	12	4.16251	3.96744	FALSE
134	13	4.17938	3.96744	FALSE
134	14	4.20387	3.96744	FALSE
134	15	4.23343	3.96744	FALSE
134	16	4.26891	3.96744	FALSE
134	17	4.30836	3.96744	FALSE
134	18	4.33441	3.96744	FALSE
134	19	4.38433	3.96744	FALSE
134	20	4.42835	3.96744	FALSE
134	21	4.45673	3.96744	FALSE
134	22	4.48966	3.96744	FALSE
134	23	4.52668	3.96744	FALSE
134	24	4.57572	3.96744	FALSE
134	25	4.62309	3.96744	FALSE
134	26	4.65786	3.96744	FALSE
134	27	4.69183	3.96744	FALSE
134	28	4.73439	3.96744	FALSE
134	29	4.7784	3.96744	FALSE
134	30	4.81817	3.96744	FALSE
134	31	4.85821	3.96744	FALSE
134	32	4.90851	3.96744	FALSE
134	33	4.95782	3.96744	FALSE
134	34	4.99166	3.96744	FALSE
134	35	5.03384	3.96744	FALSE
134	36	5.07828	3.96744	FALSE
134	37	5.10294	3.96744	FALSE
134	38	5.15237	3.96744	FALSE
134	39	5.17843	3.96744	FALSE
134	40	5.20419	3.96744	FALSE
134	41	5.25442	3.96744	FALSE
134	44	3.53059	3.96744	TRUE
134	45	3.46435	3.96744	TRUE
134	46	3.42962	3.96744	TRUE
134	48	3.31666	3.96744	TRUE
134	49	3.23334	3.96744	TRUE
134	50	3.13116	3.96744	TRUE
134	51	3.46871	3.96744	TRUE
134	53	2.75113	3.96744	TRUE
134	41	5.25442	3.96744	TRUE
47	1	2.7494	2.77927	FALSE
47	2	2.77927	2.77927	FALSE
47	3	2.78514	2.77927	FALSE
47	4	2.83255	2.77927	FALSE
47	5	2.86336	2.77927	FALSE
47	6	2.8852	2.77927	FALSE
47	7	2.93583	2.77927	FALSE
47	8	2.96297	2.77927	FALSE
47	9	2.99269	2.77927	FALSE
47	10	3.01169	2.77927	FALSE
47	11	3.04441	2.77927	FALSE
47	12	3.06398	2.77927	FALSE
47	13	3.09573	2.77927	FALSE
47	14	3.12564	2.77927	FALSE
47	15	3.15486	2.77927	FALSE
47	16	3.17762	2.77927	FALSE
47	17	3.21662	2.77927	FALSE
47	18	3.23992	2.77927	FALSE
47	19	3.27986	2.77927	FALSE
47	20	3.30524	2.77927	FALSE
47	21	3.345	2.77927	FALSE
47	22	3.372	2.77927	FALSE
47	23	3.38592	2.77927	FALSE
47	24	3.4217	2.77927	FALSE
47	25	3.44005	2.77927	FALSE
47	26	3.46846	2.77927	FALSE
47	27	3.51833	2.77927	FALSE
47	28	3.54722	2.77927	FALSE
47	29	3.56838	2.77927	FALSE
47	30	3.58842	2.77927	FALSE
47	31	3.60848	2.77927	FALSE
47	32	3.64918	2.77927	FALSE
47	33	3.65875	2.77927	FALSE
47	34	3.68822	2.77927	FALSE
47	35	3.70792	2.77927	FALSE
47	36	3.73382	2.77927	FALSE
47	37	3.75907	2.77927	FALSE
47	38	3.78859	2.77927	FALSE
47	39	3.81407	2.77927	FALSE
47	40	3.82929	2.77927	FALSE
47	41	3.85385	2.77927	FALSE
47	42	3.87524	2.77927	FALSE
47	43	3.59197	2.77927	TRUE
47	44	3.46213	2.77927	TRUE
47	46	3.15369	2.77927	TRUE
47	47	3.0688	2.77927	TRUE
47	48	3.0355	2.77927	TRUE
47	49	3.02004	2.77927	TRUE
47	50	2.97774	2.77927	TRUE
47	56	2.85667	2.77927	TRUE
37	1	3.49239	3.50617	FALSE
37	2	3.50617	3.50617	FALSE
37	3	3.51289	3.50617	FALSE
37	4	3.54292	3.50617	FALSE
37	5	3.56232	3.50617	FALSE
37	6	3.57669	3.50617	FALSE
37	7	3.57066	3.50617	FALSE
37	8	3.62293	3.50617	FALSE
37	9	3.63698	3.50617	FALSE
37	10	3.65851	3.50617	FALSE
37	11	3.66525	3.50617	FALSE
37	12	3.70884	3.50617	FALSE
37	13	3.71979	3.50617	FALSE
37	14	3.73118	3.50617	FALSE
37	15	3.73382	3.50617	FALSE
37	16	3.76583	3.50617	FALSE
37	17	3.79388	3.50617	FALSE
37	18	3.79398	3.50617	FALSE
37	19	3.83755	3.50617	FALSE
37	20	3.84757	3.50617	FALSE
37	21	3.86763	3.50617	FALSE
37	22	3.896	3.50617	FALSE
37	23	3.9155	3.50617	FALSE
37	24	3.94672	3.50617	FALSE
37	25	3.95376	3.50617	FALSE
37	26	3.98947	3.50617	FALSE
37	27	4.02306	3.50617	FALSE
37	28	4.07329	3.50617	FALSE
37	29	4.10769	3.50617	FALSE
37	30	4.14546	3.50617	FALSE
37	31	4.19867	3.50617	FALSE
37	32	4.21592	3.50617	FALSE
37	33	4.26095	3.50617	FALSE
37	34	4.28642	3.50617	FALSE
37	35	4.31685	3.50617	FALSE
37	36	4.35101	3.50617	FALSE
37	37	4.3847	3.50617	FALSE
37	38	4.41438	3.50617	FALSE
37	39	4.41632	3.50617	FALSE
37	40	4.44308	3.50617	FALSE
37	41	4.44565	3.50617	FALSE
37	42	4.45001	3.50617	FALSE
37	43	4.39385	3.50617	TRUE
37	44	4.40223	3.50617	TRUE
37	45	4.43277	3.50617	TRUE
37	46	4.46448	3.50617	TRUE
37	47	4.48259	3.50617	TRUE
37	48	4.51142	3.50617	TRUE
37	49	4.544	3.50617	TRUE
37	50	4.56529	3.50617	TRUE
37	51	4.59956	3.50617	TRUE
37	52	4.02662	3.50617	TRUE
37	53	3.90092	3.50617	TRUE
37	54	4.12488	3.50617	TRUE
37	55	3.82845	3.50617	TRUE
37	56	3.7709	3.50617	TRUE
37	57	3.7531	3.50617	TRUE
37	58	3.75474	3.50617	TRUE
37	60	3.7494	3.50617	TRUE
37	61	3.73706	3.50617	TRUE
128	1	3.42951	3.46731	FALSE
128	2	3.46731	3.46731	FALSE
128	3	3.47672	3.46731	FALSE
128	4	3.50538	3.46731	FALSE
128	5	3.53446	3.46731	FALSE
128	6	3.53327	3.46731	FALSE
128	7	3.55689	3.46731	FALSE
128	8	3.56649	3.46731	FALSE
128	9	3.59298	3.46731	FALSE
128	10	3.61439	3.46731	FALSE
128	11	3.62709	3.46731	FALSE
128	12	3.64292	3.46731	FALSE
128	13	3.6486	3.46731	FALSE
128	14	3.6718	3.46731	FALSE
128	15	3.68012	3.46731	FALSE
128	16	3.70133	3.46731	FALSE
128	17	3.71559	3.46731	FALSE
128	18	3.72701	3.46731	FALSE
128	19	3.74535	3.46731	FALSE
128	20	3.75895	3.46731	FALSE
128	21	3.77076	3.46731	FALSE
128	22	3.78579	3.46731	FALSE
128	23	3.79733	3.46731	FALSE
128	24	3.8024	3.46731	FALSE
128	25	3.82881	3.46731	FALSE
128	26	3.84539	3.46731	FALSE
128	27	3.85327	3.46731	FALSE
128	28	3.87052	3.46731	FALSE
128	29	3.86628	3.46731	FALSE
128	30	3.89026	3.46731	FALSE
128	31	3.89931	3.46731	FALSE
128	32	3.90478	3.46731	FALSE
128	33	3.92224	3.46731	FALSE
128	34	3.93382	3.46731	FALSE
128	35	3.92835	3.46731	FALSE
128	36	3.96098	3.46731	FALSE
128	37	3.96145	3.46731	FALSE
128	38	3.96395	3.46731	FALSE
128	39	3.97706	3.46731	FALSE
128	40	3.99103	3.46731	FALSE
128	41	4.00209	3.46731	FALSE
128	42	4.0293	3.46731	FALSE
128	43	4.02144	3.46731	TRUE
128	44	4.03443	3.46731	TRUE
128	45	4.03398	3.46731	TRUE
128	46	4.05894	3.46731	TRUE
128	47	4.03504	3.46731	TRUE
128	48	4.07415	3.46731	TRUE
128	49	4.08524	3.46731	TRUE
128	50	4.0941	3.46731	TRUE
128	51	4.08547	3.46731	TRUE
128	52	4.10028	3.46731	TRUE
128	53	4.12691	3.46731	TRUE
128	54	4.12774	3.46731	TRUE
128	55	4.1373	3.46731	TRUE
128	56	4.15677	3.46731	TRUE
128	57	4.15278	3.46731	TRUE
128	58	4.16851	3.46731	TRUE
128	59	4.16808	3.46731	TRUE
128	60	4.1603	3.46731	TRUE
128	61	2.37807	3.46731	TRUE
47	42	3.87524	2.77927	TRUE
37	42	4.45001	3.50617	TRUE
128	42	4.0293	3.46731	TRUE
22	1	2.56589	2.57625	FALSE
22	2	2.57625	2.57625	FALSE
22	3	2.59279	2.57625	FALSE
22	4	2.60713	2.57625	FALSE
22	5	2.62391	2.57625	FALSE
22	6	2.63218	2.57625	FALSE
22	7	2.63249	2.57625	FALSE
22	8	2.65524	2.57625	FALSE
22	9	2.66207	2.57625	FALSE
22	10	2.67216	2.57625	FALSE
22	11	2.69469	2.57625	FALSE
22	12	2.70111	2.57625	FALSE
22	13	2.72682	2.57625	FALSE
22	14	2.73539	2.57625	FALSE
22	15	2.73844	2.57625	FALSE
22	16	2.74082	2.57625	FALSE
22	17	2.74175	2.57625	FALSE
22	18	2.77209	2.57625	FALSE
22	19	2.77083	2.57625	FALSE
22	20	2.80475	2.57625	FALSE
22	21	2.81604	2.57625	FALSE
22	22	2.83061	2.57625	FALSE
22	23	2.84341	2.57625	FALSE
22	24	2.8668	2.57625	FALSE
22	25	2.89454	2.57625	FALSE
22	26	2.91315	2.57625	FALSE
22	27	2.93205	2.57625	FALSE
22	28	2.95867	2.57625	FALSE
22	29	2.98164	2.57625	FALSE
22	30	3.00024	2.57625	FALSE
22	31	3.0284	2.57625	FALSE
22	32	3.05024	2.57625	FALSE
22	33	3.0674	2.57625	FALSE
22	34	3.0681	2.57625	FALSE
22	35	3.096	2.57625	FALSE
22	36	3.12496	2.57625	FALSE
22	37	3.1315	2.57625	FALSE
22	38	3.14577	2.57625	FALSE
22	39	3.15705	2.57625	FALSE
22	40	3.164	2.57625	FALSE
22	41	3.20206	2.57625	FALSE
22	42	3.19791	2.57625	FALSE
22	43	3.22892	2.57625	FALSE
22	44	3.09714	2.57625	TRUE
22	45	3.10673	2.57625	TRUE
22	46	3.1043	2.57625	TRUE
22	47	3.12188	2.57625	TRUE
22	48	3.13366	2.57625	TRUE
22	49	3.13627	2.57625	TRUE
22	50	3.13785	2.57625	TRUE
22	51	3.16097	2.57625	TRUE
22	52	3.16399	2.57625	TRUE
22	53	3.15853	2.57625	TRUE
22	54	3.08081	2.57625	TRUE
22	55	3.04471	2.57625	TRUE
22	56	3.04215	2.57625	TRUE
22	57	3.03554	2.57625	TRUE
22	58	3.03835	2.57625	TRUE
22	59	3.07126	2.57625	TRUE
22	60	3.07017	2.57625	TRUE
22	61	3.09467	2.57625	TRUE
22	43	3.22892	2.57625	TRUE
51	1	2.62073	2.64731	FALSE
51	2	2.64731	2.64731	FALSE
51	3	2.65247	2.64731	FALSE
51	4	2.66958	2.64731	FALSE
51	5	2.68195	2.64731	FALSE
51	6	2.68603	2.64731	FALSE
51	7	2.71355	2.64731	FALSE
51	8	2.70921	2.64731	FALSE
51	9	2.71218	2.64731	FALSE
51	10	2.71556	2.64731	FALSE
51	11	2.7494	2.64731	FALSE
51	12	2.76899	2.64731	FALSE
51	13	2.78091	2.64731	FALSE
51	14	2.7821	2.64731	FALSE
51	15	2.79825	2.64731	FALSE
51	16	2.81728	2.64731	FALSE
51	17	2.81864	2.64731	FALSE
51	18	2.85011	2.64731	FALSE
51	19	2.8485	2.64731	FALSE
51	20	2.88212	2.64731	FALSE
51	21	2.90354	2.64731	FALSE
51	22	2.92065	2.64731	FALSE
51	23	2.93268	2.64731	FALSE
51	24	2.94591	2.64731	FALSE
51	25	2.96207	2.64731	FALSE
51	26	2.97973	2.64731	FALSE
51	27	3.00191	2.64731	FALSE
51	28	3.0158	2.64731	FALSE
51	29	3.0133	2.64731	FALSE
51	30	3.04198	2.64731	FALSE
51	31	3.05384	2.64731	FALSE
51	32	3.07002	2.64731	FALSE
51	33	3.08043	2.64731	FALSE
51	34	3.09987	2.64731	FALSE
51	35	3.10989	2.64731	FALSE
51	36	3.11377	2.64731	FALSE
51	37	3.13247	2.64731	FALSE
51	38	3.14588	2.64731	FALSE
51	39	3.16753	2.64731	FALSE
51	40	3.17148	2.64731	FALSE
51	41	3.17752	2.64731	FALSE
51	42	3.17268	2.64731	FALSE
51	43	3.20291	2.64731	FALSE
51	44	3.21103	2.64731	FALSE
51	45	3.2036	2.64731	TRUE
51	46	3.23115	2.64731	TRUE
51	47	3.23292	2.64731	TRUE
51	48	3.24248	2.64731	TRUE
51	49	3.24441	2.64731	TRUE
51	50	3.26088	2.64731	TRUE
51	51	3.26532	2.64731	TRUE
51	52	3.27886	2.64731	TRUE
51	53	3.28071	2.64731	TRUE
51	54	3.28943	2.64731	TRUE
51	55	3.29143	2.64731	TRUE
51	56	3.29713	2.64731	TRUE
51	57	3.30918	2.64731	TRUE
51	58	3.32511	2.64731	TRUE
51	59	3.33761	2.64731	TRUE
51	60	3.3413	2.64731	TRUE
51	61	3.34136	2.64731	TRUE
138	1	3.03145	3.07197	FALSE
138	2	3.07197	3.07197	FALSE
138	3	3.10244	3.07197	FALSE
138	4	3.12189	3.07197	FALSE
138	5	3.14962	3.07197	FALSE
138	6	3.16334	3.07197	FALSE
138	7	3.17851	3.07197	FALSE
138	8	3.21578	3.07197	FALSE
138	9	3.21527	3.07197	FALSE
138	10	3.24305	3.07197	FALSE
138	11	3.26786	3.07197	FALSE
138	12	3.29177	3.07197	FALSE
138	13	3.31855	3.07197	FALSE
138	14	3.32461	3.07197	FALSE
138	15	3.36193	3.07197	FALSE
138	16	3.36147	3.07197	FALSE
138	17	3.37891	3.07197	FALSE
138	18	3.3941	3.07197	FALSE
138	19	3.41702	3.07197	FALSE
138	20	3.44448	3.07197	FALSE
138	21	3.44976	3.07197	FALSE
138	22	3.45625	3.07197	FALSE
138	23	3.46835	3.07197	FALSE
138	24	3.48099	3.07197	FALSE
138	25	3.51048	3.07197	FALSE
138	26	3.53079	3.07197	FALSE
138	27	3.54756	3.07197	FALSE
138	28	3.55875	3.07197	FALSE
138	29	3.57435	3.07197	FALSE
138	30	3.6075	3.07197	FALSE
138	31	3.621	3.07197	FALSE
138	32	3.63813	3.07197	FALSE
138	33	3.67184	3.07197	FALSE
138	34	3.70107	3.07197	FALSE
138	35	3.72668	3.07197	FALSE
138	36	3.74492	3.07197	FALSE
138	37	3.76642	3.07197	FALSE
138	38	3.78372	3.07197	FALSE
138	39	3.80884	3.07197	FALSE
138	40	3.825	3.07197	FALSE
138	41	3.85258	3.07197	FALSE
138	42	3.868	3.07197	FALSE
138	43	3.88579	3.07197	FALSE
138	44	3.89656	3.07197	FALSE
138	45	3.62811	3.07197	TRUE
138	46	3.5403	3.07197	TRUE
138	47	3.45386	3.07197	TRUE
138	48	3.37636	3.07197	TRUE
138	49	3.32778	3.07197	TRUE
138	50	3.32727	3.07197	TRUE
138	51	3.31954	3.07197	TRUE
138	52	3.33128	3.07197	TRUE
138	53	3.29061	3.07197	TRUE
138	54	3.30061	3.07197	TRUE
138	55	3.29939	3.07197	TRUE
138	56	3.27331	3.07197	TRUE
138	57	3.24853	3.07197	TRUE
138	59	3.26253	3.07197	TRUE
138	60	3.22191	3.07197	TRUE
51	44	3.21103	2.64731	TRUE
138	44	3.89656	3.07197	TRUE
43	1	2.77164	2.7942	FALSE
43	2	2.7942	2.7942	FALSE
43	3	2.80818	2.7942	FALSE
43	4	2.82173	2.7942	FALSE
43	5	2.82144	2.7942	FALSE
43	6	2.85313	2.7942	FALSE
43	7	2.85383	2.7942	FALSE
43	8	2.88463	2.7942	FALSE
43	9	2.9044	2.7942	FALSE
43	10	2.91632	2.7942	FALSE
43	11	2.93817	2.7942	FALSE
43	12	2.95759	2.7942	FALSE
43	13	2.97368	2.7942	FALSE
43	14	2.98192	2.7942	FALSE
43	15	2.97932	2.7942	FALSE
43	16	2.9968	2.7942	FALSE
43	17	2.99624	2.7942	FALSE
43	18	2.99275	2.7942	FALSE
43	19	2.98863	2.7942	FALSE
43	20	3.00342	2.7942	FALSE
43	21	3.01411	2.7942	FALSE
43	22	3.01529	2.7942	FALSE
43	23	3.03535	2.7942	FALSE
43	24	3.03525	2.7942	FALSE
43	25	3.03974	2.7942	FALSE
43	26	3.07837	2.7942	FALSE
43	27	3.11118	2.7942	FALSE
43	28	3.13834	2.7942	FALSE
43	29	3.15803	2.7942	FALSE
43	30	3.18268	2.7942	FALSE
43	31	3.20313	2.7942	FALSE
43	32	3.23463	2.7942	FALSE
43	33	3.23293	2.7942	FALSE
43	34	3.2532	2.7942	FALSE
43	35	3.27328	2.7942	FALSE
43	36	3.30514	2.7942	FALSE
43	37	3.31746	2.7942	FALSE
43	38	3.33472	2.7942	FALSE
43	39	3.34293	2.7942	FALSE
43	40	3.36564	2.7942	FALSE
43	41	3.37264	2.7942	FALSE
43	42	3.40602	2.7942	FALSE
43	43	3.44239	2.7942	FALSE
43	44	3.45107	2.7942	FALSE
43	45	3.45622	2.7942	FALSE
43	46	3.4087	2.7942	TRUE
43	47	3.26153	2.7942	TRUE
43	48	3.23182	2.7942	TRUE
43	49	3.20401	2.7942	TRUE
43	50	3.1695	2.7942	TRUE
43	51	3.14387	2.7942	TRUE
43	52	3.13136	2.7942	TRUE
43	53	3.0845	2.7942	TRUE
43	54	3.05517	2.7942	TRUE
43	55	2.98499	2.7942	TRUE
43	56	3.00069	2.7942	TRUE
43	57	2.9756	2.7942	TRUE
43	58	2.96944	2.7942	TRUE
43	59	2.93547	2.7942	TRUE
43	60	2.94062	2.7942	TRUE
43	61	2.92437	2.7942	TRUE
115	1	2.95269	2.96659	FALSE
115	2	2.96659	2.96659	FALSE
115	3	2.96733	2.96659	FALSE
115	4	2.97634	2.96659	FALSE
115	5	2.97466	2.96659	FALSE
115	6	2.99614	2.96659	FALSE
115	7	3.02451	2.96659	FALSE
115	8	3.02987	2.96659	FALSE
115	9	3.03218	2.96659	FALSE
115	10	3.05954	2.96659	FALSE
115	11	3.08465	2.96659	FALSE
115	12	3.09238	2.96659	FALSE
115	13	3.10983	2.96659	FALSE
115	14	3.13261	2.96659	FALSE
115	15	3.148	2.96659	FALSE
115	16	3.17525	2.96659	FALSE
115	17	3.18825	2.96659	FALSE
115	18	3.21837	2.96659	FALSE
115	19	3.22469	2.96659	FALSE
115	20	3.25746	2.96659	FALSE
115	21	3.28389	2.96659	FALSE
115	22	3.28761	2.96659	FALSE
115	23	3.31153	2.96659	FALSE
115	24	3.3427	2.96659	FALSE
115	25	3.35344	2.96659	FALSE
115	26	3.38071	2.96659	FALSE
115	27	3.4021	2.96659	FALSE
115	28	3.43578	2.96659	FALSE
115	29	3.45926	2.96659	FALSE
115	30	3.46828	2.96659	FALSE
115	31	3.47455	2.96659	FALSE
115	32	3.50359	2.96659	FALSE
115	33	3.5262	2.96659	FALSE
115	34	3.53888	2.96659	FALSE
115	35	3.57432	2.96659	FALSE
115	36	3.58115	2.96659	FALSE
115	37	3.60097	2.96659	FALSE
115	38	3.63223	2.96659	FALSE
115	39	3.65281	2.96659	FALSE
115	40	3.6714	2.96659	FALSE
115	41	3.6932	2.96659	FALSE
115	42	3.70348	2.96659	FALSE
115	43	3.70235	2.96659	FALSE
115	44	3.75203	2.96659	FALSE
115	45	3.76044	2.96659	FALSE
115	46	2.5419	2.96659	TRUE
115	47	2.70877	2.96659	TRUE
115	48	3.14822	2.96659	TRUE
115	49	3.09891	2.96659	TRUE
115	50	3.07047	2.96659	TRUE
115	51	2.93912	2.96659	TRUE
115	52	2.86595	2.96659	TRUE
115	53	2.80268	2.96659	TRUE
115	54	2.77624	2.96659	TRUE
115	55	2.76558	2.96659	TRUE
115	56	2.77843	2.96659	TRUE
115	57	2.76041	2.96659	TRUE
115	59	2.79157	2.96659	TRUE
115	60	2.7848	2.96659	TRUE
115	61	2.78977	2.96659	TRUE
43	45	3.45622	2.7942	TRUE
115	45	3.76044	2.96659	TRUE
45	1	3.17584	3.17764	FALSE
45	2	3.17764	3.17764	FALSE
45	3	3.18538	3.17764	FALSE
45	4	3.20527	3.17764	FALSE
45	5	3.20707	3.17764	FALSE
45	6	3.22916	3.17764	FALSE
45	7	3.23706	3.17764	FALSE
45	8	3.23719	3.17764	FALSE
45	9	3.25592	3.17764	FALSE
45	10	3.26263	3.17764	FALSE
45	11	3.26687	3.17764	FALSE
45	12	3.29398	3.17764	FALSE
45	13	3.29698	3.17764	FALSE
45	14	3.3138	3.17764	FALSE
45	15	3.32482	3.17764	FALSE
45	16	3.33927	3.17764	FALSE
45	17	3.36097	3.17764	FALSE
45	18	3.37654	3.17764	FALSE
45	19	3.39517	3.17764	FALSE
45	20	3.4156	3.17764	FALSE
45	21	3.42248	3.17764	FALSE
45	22	3.45481	3.17764	FALSE
45	23	3.49017	3.17764	FALSE
45	24	3.51756	3.17764	FALSE
[truncated: 545 more rows]

## Sheet: Fig3B
UPLC profile				Content analysis
Retention time (min)	Untreated	1 mM D-cycloserine			Untreated	Untreated	Untreated	1 mM D-cycloserine	1 mM D-cycloserine	1 mM D-cycloserine
2	2.93944e-06	4.68088e-05			R1	R2	R3	R1	R2	R3
2.00167	4.52575e-06	5.34873e-05		Monomers (%)	65.9604	69.8927	71.1467	75.9254	76.0836	75.6953
2.00333	6.1299e-06	5.98449e-05		Dimers (%)	27.5705	24.0515	22.9251	21.6665	21.4552	22.4397
2.005	7.69975e-06	6.57335e-05		Trimers (%)	6.46907	6.05583	5.92813	2.40816	2.46121	1.86498
2.00667	9.20424e-06	7.10544e-05		Crosslink (%)	40.5087	36.1631	34.7814	26.4828	26.3776	26.1697
2.00833	1.06123e-05	7.57019e-05		Anhydro (%)	4.52778	3.95949	4.24669	4.4439	4.32806	4.41699
2.01	1.18854e-05	7.94994e-05		Chain length (units)	22.0859	25.2557	23.5477	22.5028	23.105	22.6399
2.01167	1.29954e-05	8.22886e-05
2.01333	1.39173e-05	8.39777e-05		Relative molar abundance (%)
2.015	1.46276e-05	8.44748e-05		M3	6.94786	7.1115	7.56579	10.9371	11.1062	11.0472
2.01667	1.51028e-05	8.3685e-05		M4G	2.43547	2.69763	2.78104	2.23978	1.95942	2.03604
2.01833	1.53481e-05	8.15834e-05		M3-Lpp	5.27131	5.6497	6.0681	6.64848	6.5484	6.23632
2.02	1.5385e-05	7.82794e-05		M4	44.9704	46.5342	47.2435	53.3471	53.4153	53.8824
2.02167	1.52323e-05	7.40657e-05		M2	3.70983	4.43002	4.16284	2.35676	2.76941	2.24055
2.02333	1.48876e-05	6.9235e-05		M4Anh	2.62556	3.46962	3.32551	0.396214	0.284875	0.252729
2.025	1.43531e-05	6.39634e-05		D44	15.7784	12.0839	13.0697	11.3316	11.2099	11.6427
2.02667	1.36457e-05	5.83745e-05		D45	0.6765	0.87375	0.841898	0.35194	0.39805	0.403097
2.02833	1.28266e-05	5.26269e-05		Other dimers	9.21347	10.604	8.09238	6.49462	6.49341	6.44419
2.03	1.1961e-05	4.69287e-05		D44Anh	1.01183	0.489871	0.694521	3.48613	3.35386	3.54783
2.03167	1.10828e-05	4.13962e-05		Other dimers anhydro	0.890383	0	0.22666	0.00216135	0	0.401948
2.03333	1.01866e-05	3.61599e-05		T444	1.39136	0.974916	1.01422	0.774093	0.728938	0.78992
2.035	9.26679e-06	3.13044e-05		Other trimers	5.07771	5.08091	4.9139	1.07468	1.04295	0.860577
2.03667	8.34521e-06	2.68227e-05		Other trimers anhydro	0	0	0	0.559388	0.689322	0.214483
2.03833	7.44806e-06	2.26584e-05
2.04	6.58648e-06	1.88537e-05
2.04167	5.78219e-06	1.55356e-05
2.04333	5.04784e-06	1.27182e-05
2.045	4.38252e-06	1.03134e-05
2.04667	3.78383e-06	8.23301e-06
2.04833	3.2418e-06	6.46994e-06
2.05	2.74649e-06	4.9925e-06
2.05167	2.29246e-06	3.70546e-06
2.05333	1.88334e-06	2.54538e-06
2.055	1.52725e-06	1.54042e-06
2.05667	1.22631e-06	7.71732e-07
2.05833	9.8564e-07	2.88658e-07
2.06	7.8172e-07	4.88741e-08
2.06167	6.00075e-07	-4.93678e-10
2.06333	4.26231e-07	7.70927e-08
2.065	2.63797e-07	2.534e-07
2.06667	1.2394e-07	5.21373e-07
2.06833	5.0961e-08	8.98671e-07
2.07	6.80825e-08	1.45228e-06
2.07167	1.80419e-07	2.22097e-06
2.07333	3.62945e-07	3.19418e-06
2.075	6.04134e-07	4.34304e-06
2.07667	9.19191e-07	5.69512e-06
2.07833	1.33222e-06	7.31741e-06
2.08	1.86133e-06	9.28043e-06
2.08167	2.49596e-06	1.15877e-05
2.08333	3.22405e-06	1.42005e-05
2.085	4.02148e-06	1.70553e-05
2.08667	4.88826e-06	2.00569e-05
2.08833	5.83493e-06	2.31772e-05
2.09	6.86751e-06	2.64478e-05
2.09167	7.97397e-06	2.99181e-05
2.09333	9.15429e-06	3.35881e-05
2.095	1.03889e-05	3.7338e-05
2.09667	1.1637e-05	4.10831e-05
2.09833	1.28596e-05	4.47528e-05
2.1	1.40233e-05	4.8298e-05
2.10167	1.51071e-05	5.16867e-05
2.10333	1.61186e-05	5.47992e-05
2.105	1.70638e-05	5.75331e-05
2.10667	1.79366e-05	5.97933e-05
2.10833	1.86397e-05	6.13792e-05
2.11	1.90865e-05	6.2094e-05
2.11167	1.92921e-05	6.19081e-05
2.11333	1.929e-05	6.08695e-05
2.115	1.91346e-05	5.90965e-05
2.11667	1.88667e-05	5.66937e-05
2.11833	1.85047e-05	5.37583e-05
2.12	1.80366e-05	5.04123e-05
2.12167	1.74596e-05	4.67954e-05
2.12333	1.68026e-05	4.30048e-05
2.125	1.61275e-05	3.91027e-05
2.12667	1.54947e-05	3.51581e-05
2.12833	1.49151e-05	3.12684e-05
2.13	1.43767e-05	2.75379e-05
2.13167	1.38571e-05	2.40604e-05
2.13333	1.337e-05	2.09122e-05
2.135	1.29323e-05	1.8201e-05
2.13667	1.25561e-05	1.60172e-05
2.13833	1.22491e-05	1.43452e-05
2.14	1.20055e-05	1.31378e-05
2.14167	1.17813e-05	1.2154e-05
2.14333	1.15302e-05	1.12055e-05
2.145	1.12531e-05	1.02781e-05
2.14667	1.09446e-05	9.38248e-06
2.14833	1.06042e-05	8.50447e-06
2.15	1.02251e-05	7.66878e-06
2.15167	9.80811e-06	6.90714e-06
2.15333	9.36155e-06	6.19134e-06
2.155	8.89378e-06	5.45437e-06
2.15667	8.39957e-06	4.61163e-06
2.15833	7.87069e-06	3.70189e-06
2.16	7.31096e-06	2.79569e-06
2.16167	6.72571e-06	1.96704e-06
2.16333	6.12932e-06	1.23361e-06
2.165	5.51806e-06	6.20059e-07
2.16667	4.89426e-06	1.89873e-07
2.16833	4.26777e-06	-5.28877e-10
2.17	3.65899e-06	5.23588e-08
2.17167	3.07173e-06	3.23867e-07
2.17333	2.49928e-06	8.1753e-07
2.175	1.95208e-06	1.53685e-06
2.17667	1.46065e-06	2.55238e-06
2.17833	1.05516e-06	3.89936e-06
2.18	7.29548e-07	5.57779e-06
2.18167	4.64244e-07	7.55595e-06
2.18333	2.4416e-07	9.82324e-06
2.185	8.43682e-08	1.24396e-05
2.18667	-4.52068e-11	1.53945e-05
2.18833	4.47547e-09	1.86809e-05
2.19	1.05473e-07	2.22528e-05
2.19167	3.07468e-07	2.60469e-05
2.19333	6.11972e-07	3.00173e-05
2.195	1.01295e-06	3.41006e-05
2.19667	1.50738e-06	3.8279e-05
2.19833	2.10433e-06	4.25069e-05
2.2	2.80377e-06	4.67206e-05
2.20167	3.60271e-06	5.08285e-05
2.20333	4.49813e-06	5.47037e-05
2.205	5.49907e-06	5.82475e-05
2.20667	6.60402e-06	6.14493e-05
2.20833	7.79464e-06	6.40598e-05
2.21	9.06939e-06	6.58558e-05
2.21167	1.04226e-05	6.67838e-05
2.21333	1.18424e-05	6.68542e-05
2.215	1.3293e-05	6.61228e-05
2.21667	1.47417e-05	6.47164e-05
2.21833	1.6169e-05	6.27753e-05
2.22	1.75466e-05	6.03944e-05
2.22167	1.88538e-05	5.76193e-05
2.22333	2.00758e-05	5.45272e-05
2.225	2.12009e-05	5.12797e-05
2.22667	2.22158e-05	4.80668e-05
2.22833	2.30772e-05	4.50082e-05
2.23	2.37551e-05	4.21669e-05
2.23167	2.42287e-05	3.96094e-05
2.23333	2.44985e-05	3.74234e-05
2.235	2.45708e-05	3.57356e-05
2.23667	2.44533e-05	3.46478e-05
2.23833	2.41827e-05	3.42759e-05
2.24	2.37938e-05	3.47078e-05
2.24167	2.31826e-05	3.57127e-05
2.24333	2.2248e-05	3.69961e-05
2.245	2.1019e-05	3.85012e-05
2.24667	1.95589e-05	4.02727e-05
2.24833	1.79298e-05	4.23522e-05
2.25	1.62009e-05	4.46861e-05
2.25167	1.44117e-05	4.71115e-05
2.25333	1.26106e-05	4.95112e-05
2.255	1.08534e-05	5.18383e-05
2.25667	9.19747e-06	5.41349e-05
2.25833	7.68525e-06	5.64386e-05
2.26	6.35148e-06	5.86958e-05
2.26167	5.26263e-06	6.08388e-05
2.26333	4.48062e-06	6.27965e-05
2.265	4.04779e-06	6.45676e-05
2.26667	3.96727e-06	6.618e-05
2.26833	4.25727e-06	6.7675e-05
2.27	4.95109e-06	6.9112e-05
2.27167	6.09257e-06	7.0564e-05
2.27333	7.71802e-06	7.20834e-05
2.275	9.72134e-06	7.37821e-05
2.27667	1.19772e-05	7.57418e-05
2.27833	1.44545e-05	7.79914e-05
2.28	1.71344e-05	8.05738e-05
2.28167	1.99811e-05	8.3497e-05
2.28333	2.29607e-05	8.66806e-05
2.285	2.60466e-05	8.99911e-05
2.28667	2.92048e-05	9.33023e-05
2.28833	3.23995e-05	9.65376e-05
2.29	3.55683e-05	9.97116e-05
2.29167	3.86528e-05	0.000102815
2.29333	4.15948e-05	0.00010577
2.295	4.43559e-05	0.000108415
2.29667	4.69033e-05	0.00011058
2.29833	4.9185e-05	0.000112182
2.3	5.11503e-05	0.000113199
2.30167	5.2747e-05	0.000113655
2.30333	5.39606e-05	0.000113569
2.305	5.47844e-05	0.000112924
2.30667	5.52202e-05	0.000111679
2.30833	5.53787e-05	0.000109969
2.31	5.53617e-05	0.000107972
2.31167	5.51671e-05	0.00010573
2.31333	5.47704e-05	0.000103275
2.315	5.41728e-05	0.000100668
2.31667	5.33797e-05	9.79028e-05
2.31833	5.24149e-05	9.49122e-05
2.32	5.12989e-05	9.17145e-05
2.32167	5.003e-05	8.83666e-05
2.32333	4.86257e-05	8.50381e-05
2.325	4.70991e-05	8.17898e-05
2.32667	4.54723e-05	7.8569e-05
2.32833	4.37542e-05	7.52918e-05
2.33	4.19455e-05	7.19372e-05
2.33167	4.00595e-05	6.85623e-05
2.33333	3.81018e-05	6.51958e-05
2.335	3.60689e-05	6.18451e-05
2.33667	3.39363e-05	5.84863e-05
2.33833	3.16809e-05	5.50596e-05
2.34	2.92856e-05	5.1488e-05
2.34167	2.68768e-05	4.79287e-05
2.34333	2.45886e-05	4.45592e-05
2.345	2.2424e-05	4.139e-05
2.34667	2.03634e-05	3.83151e-05
2.34833	1.84008e-05	3.52639e-05
2.35	1.65512e-05	3.22927e-05
2.35167	1.48192e-05	2.95106e-05
2.35333	1.32184e-05	2.6995e-05
2.355	1.17321e-05	2.46895e-05
2.35667	1.03362e-05	2.25514e-05
2.35833	9.02783e-06	2.05313e-05
2.36	7.80232e-06	1.85763e-05
2.36167	6.67479e-06	1.66367e-05
2.36333	5.63468e-06	1.473e-05
2.365	4.679e-06	1.29514e-05
2.36667	3.82731e-06	1.13464e-05
2.36833	3.08567e-06	9.9432e-06
2.37	2.44653e-06	8.68167e-06
2.37167	1.87069e-06	7.52995e-06
2.37333	1.34309e-06	6.45259e-06
2.375	8.80314e-07	5.40534e-06
2.37667	5.12501e-07	4.41449e-06
2.37833	2.47191e-07	3.46244e-06
2.38	7.83578e-08	2.61264e-06
2.38167	-3.01589e-11	1.87569e-06
2.38333	2.98573e-09	1.29388e-06
2.385	8.74055e-08	8.70749e-07
2.38667	2.53223e-07	5.53394e-07
2.38833	5.20038e-07	3.03035e-07
2.39	9.02923e-07	1.02044e-07
2.39167	1.3853e-06	-2.1164e-10
2.39333	1.94456e-06	2.09523e-08
2.395	2.55205e-06	1.12633e-07
2.39667	3.21984e-06	2.88926e-07
2.39833	3.96301e-06	5.99227e-07
2.4	4.81019e-06	1.09289e-06
2.40167	5.77193e-06	1.78401e-06
2.40333	6.85728e-06	2.66906e-06
2.405	8.06322e-06	3.808e-06
2.40667	9.36565e-06	5.22198e-06
2.40833	1.07501e-05	6.92709e-06
2.41	1.22129e-05	8.9077e-06
2.41167	1.37818e-05	1.11533e-05
2.41333	1.54829e-05	1.37096e-05
2.415	1.73241e-05	1.66437e-05
2.41667	1.92848e-05	2.00543e-05
2.41833	2.1367e-05	2.40226e-05
2.42	2.35939e-05	2.86543e-05
2.42167	2.60201e-05	3.39847e-05
2.42333	2.86839e-05	4.0049e-05
2.425	3.16157e-05	4.68684e-05
2.42667	3.48615e-05	5.45417e-05
2.42833	3.84638e-05	6.32169e-05
2.43	4.24699e-05	7.3074e-05
2.43167	4.69374e-05	8.4328e-05
2.43333	5.19318e-05	9.71657e-05
2.435	5.75243e-05	0.000111795
2.43667	6.3821e-05	0.000128344
2.43833	7.09429e-05	0.000146955
2.44	7.90006e-05	0.00016786
2.44167	8.8007e-05	0.000191132
2.44333	9.80018e-05	0.000216842
2.445	0.000109153	0.000245261
2.44667	0.000121641	0.00027658
2.44833	0.000135648	0.000311015
2.45	0.000151331	0.000348786
2.45167	0.000168828	0.000390167
2.45333	0.000188269	0.000435425
2.455	0.000209793	0.000484803
2.45667	0.000233547	0.000538554
2.45833	0.000259691	0.000596838
2.46	0.000288369	0.000659617
2.46167	0.000319651	0.000726698
2.46333	0.000353563	0.000797893
2.465	0.000390062	0.000873082
2.46667	0.000429099	0.000952112
2.46833	0.000470611	0.00103468
2.47	0.000514483	0.00112029
2.47167	0.00056053	0.00120825
2.47333	0.00060849	0.00129782
2.475	0.000655804	0.00138438
2.47667	0.000700174	0.00146385
2.47833	0.000741652	0.00153622
2.48	0.000780296	0.00160131
2.48167	0.000816137	0.00165899
2.48333	0.000849133	0.0017092
2.485	0.000879178	0.00175188
2.48667	0.000906169	0.00178687
2.48833	0.000930045	0.00181396
2.49	0.000950734	0.00183314
2.49167	0.00096815	0.0018445
2.49333	0.000982229	0.00184819
2.495	0.000992987	0.00184447
2.49667	0.0010005	0.00183374
2.49833	0.00100492	0.00181673
2.5	0.00100649	0.00179426
2.50167	0.00100558	0.00176731
2.50333	0.00100261	0.00173686
2.505	0.00099804	0.00170397
2.50667	0.000992383	0.00166996
2.50833	0.000985072	0.00163461
2.51	0.000975156	0.00159683
2.51167	0.000962697	0.00155673
2.51333	0.000947799	0.00151453
2.515	0.000930572	0.00147055
2.51667	0.000911147	0.00142511
2.51833	0.00088969	0.00137849
2.52	0.000866387	0.00133097
2.52167	0.000841465	0.00128282
2.52333	0.000815157	0.00123424
2.525	0.000787682	0.00118544
2.52667	0.000759239	0.0011365
2.52833	0.000729987	0.00108745
2.53	0.000700051	0.00103825
2.53167	0.000669499	0.000988828
2.53333	0.000638389	0.00093907
2.535	0.000606757	0.000888775
2.53667	0.000574615	0.000837617
2.53833	0.00054189	0.000785223
2.54	0.000508424	0.000731156
2.54167	0.000475203	0.000677436
2.54333	0.000443418	0.000626446
2.545	0.000413197	0.000578239
2.54667	0.00038463	0.000532889
2.54833	0.000357744	0.000490434
2.55	0.000332508	0.000450777
2.55167	0.000308869	0.000413818
2.55333	0.000286772	0.000379501
2.555	0.000266191	0.000347823
2.55667	0.000247089	0.000318699
2.55833	0.000229412	0.000291953
2.56	0.00021308	0.000267427
2.56167	0.000198022	0.000244976
2.56333	0.000184174	0.000224529
2.565	0.000171459	0.000206042
2.56667	0.000159777	0.000189432
2.56833	0.000149017	0.000174622
2.57	0.000139106	0.00016161
2.57167	0.000130014	0.000150352
2.57333	0.000121721	0.000140708
2.575	0.000114216	0.000132398
2.57667	0.000107444	0.000125197
2.57833	0.000101321	0.000119051
2.58	9.57667e-05	0.000113892
2.58167	9.07239e-05	0.000109608
2.58333	8.61471e-05	0.000106115
2.585	8.19968e-05	0.000103328
2.58667	7.8232e-05	0.000101169
2.58833	7.47845e-05	9.95203e-05
2.59	7.16043e-05	9.82387e-05
2.59167	6.86489e-05	9.72417e-05
2.59333	6.58787e-05	9.64819e-05
2.595	6.328e-05	9.59438e-05
2.59667	6.08342e-05	9.55551e-05
2.59833	5.85066e-05	9.52014e-05
2.6	5.62408e-05	9.48038e-05
2.60167	5.39975e-05	9.42794e-05
2.60333	5.17793e-05	9.36302e-05
2.605	4.95724e-05	9.28511e-05
2.60667	4.73433e-05	9.19161e-05
2.60833	4.51121e-05	9.08927e-05
2.61	4.29336e-05	8.98267e-05
2.61167	4.08264e-05	8.87304e-05
2.61333	3.87778e-05	8.7588e-05
2.615	3.67687e-05	8.63698e-05
2.61667	3.48044e-05	8.50879e-05
2.61833	3.28974e-05	8.37336e-05
2.62	3.10484e-05	8.23125e-05
2.62167	2.92611e-05	8.07841e-05
2.62333	2.75195e-05	7.91111e-05
2.625	2.58379e-05	7.72993e-05
2.62667	2.42229e-05	7.53291e-05
2.62833	2.26873e-05	7.32199e-05
2.63	2.12239e-05	7.09632e-05
2.63167	1.98277e-05	6.85715e-05
2.63333	1.85036e-05	6.60887e-05
2.635	1.72584e-05	6.34954e-05
2.63667	1.61063e-05	6.07972e-05
2.63833	1.50448e-05	5.80311e-05
2.64	1.40655e-05	5.52166e-05
2.64167	1.31536e-05	5.2433e-05
2.64333	1.23006e-05	4.97188e-05
2.645	1.15043e-05	4.71056e-05
2.64667	1.07585e-05	4.45856e-05
2.64833	1.00653e-05	4.20986e-05
2.65	9.43628e-06	3.95769e-05
2.65167	8.88291e-06	3.70624e-05
2.65333	8.4017e-06	3.46639e-05
2.655	7.96787e-06	3.243e-05
2.65667	7.56882e-06	3.03466e-05
2.65833	7.20542e-06	2.8388e-05
2.66	6.88928e-06	2.6561e-05
2.66167	6.61826e-06	2.48475e-05
2.66333	6.39929e-06	2.32362e-05
2.665	6.23482e-06	2.16739e-05
2.66667	6.12888e-06	2.01424e-05
2.66833	6.06269e-06	1.86236e-05
2.67	6.01922e-06	1.71487e-05
2.67167	5.98272e-06	1.57665e-05
2.67333	5.96924e-06	1.44623e-05
2.675	5.99972e-06	1.33049e-05
2.67667	6.0891e-06	1.23375e-05
2.67833	6.22328e-06	1.1525e-05
2.68	6.36704e-06	1.07573e-05
2.68167	6.50332e-06	9.9391e-06
2.68333	6.61953e-06	9.05559e-06
2.685	6.73471e-06	8.14869e-06
2.68667	6.85284e-06	7.30288e-06
2.68833	6.96741e-06	6.59527e-06
2.69	7.06887e-06	6.03934e-06
2.69167	7.15217e-06	5.59609e-06
2.69333	7.23027e-06	5.20507e-06
2.695	7.28616e-06	4.83067e-06
2.69667	7.29664e-06	4.4549e-06
2.69833	7.24161e-06	4.0525e-06
2.7	7.12657e-06	3.65856e-06
2.70167	6.9842e-06	3.31127e-06
2.70333	6.83354e-06	3.02798e-06
2.705	6.66346e-06	2.77649e-06
2.70667	6.45848e-06	2.54234e-06
2.70833	6.209e-06	2.35895e-06
2.71	5.91708e-06	2.21445e-06
2.71167	5.58273e-06	2.06981e-06
2.71333	5.24052e-06	1.90061e-06
2.715	4.92068e-06	1.72077e-06
2.71667	4.62624e-06	1.55853e-06
2.71833	4.33299e-06	1.45988e-06
2.72	4.03042e-06	1.40694e-06
2.72167	3.71703e-06	1.37529e-06
2.72333	3.39887e-06	1.35059e-06
2.725	3.08045e-06	1.33639e-06
2.72667	2.76168e-06	1.33284e-06
2.72833	2.45478e-06	1.31169e-06
2.73	2.17467e-06	1.26244e-06
2.73167	1.91843e-06	1.153e-06
2.73333	1.65895e-06	9.87355e-07
2.735	1.38553e-06	8.07514e-07
2.73667	1.10436e-06	6.27672e-07
2.73833	8.53019e-07	4.51379e-07
2.74	6.48181e-07	2.82186e-07
2.74167	4.92897e-07	1.44643e-07
2.74333	3.66318e-07	6.34475e-08
2.745	2.53206e-07	2.11492e-08
2.74667	1.4471e-07	0
2.74833	5.4233e-08	0
2.75	-1.51743e-11	2.82482e-08
2.75167	1.50226e-09	1.09295e-07
2.75333	7.53505e-08	2.75087e-07
2.755	2.33606e-07	5.71323e-07
2.75667	4.77849e-07	1.05435e-06
2.75833	7.77794e-07	1.74192e-06
2.76	1.10948e-06	2.60933e-06
2.76167	1.46519e-06	3.66724e-06
2.76333	1.85264e-06	4.95423e-06
2.765	2.29428e-06	6.48111e-06
2.76667	2.82639e-06	8.23708e-06
2.76833	3.47914e-06	1.0194e-05
2.77	4.26453e-06	1.23873e-05
2.77167	5.16899e-06	1.48485e-05
2.77333	6.19249e-06	1.76412e-05
2.775	7.3409e-06	2.07791e-05
2.77667	8.63212e-06	2.4294e-05
2.77833	1.00738e-05	2.82395e-05
2.78	1.16677e-05	3.26298e-05
2.78167	1.342e-05	3.74447e-05
2.78333	1.53503e-05	4.26775e-05
2.785	1.74832e-05	4.83782e-05
2.78667	1.98337e-05	5.46072e-05
2.78833	2.24323e-05	6.13651e-05
2.79	2.53062e-05	6.86348e-05
2.79167	2.84857e-05	7.64239e-05
2.79333	3.19951e-05	8.47575e-05
2.795	3.58603e-05	9.36576e-05
2.79667	4.0113e-05	0.000103135
2.79833	4.48032e-05	0.00011318
2.8	4.99551e-05	0.00012374
2.80167	5.5581e-05	0.000134787
2.80333	6.16841e-05	0.000146347
2.805	6.82887e-05	0.000158427
2.80667	7.54266e-05	0.000170971
2.80833	8.29473e-05	0.000183176
2.81	9.07273e-05	0.000194354
2.81167	9.87991e-05	0.000204566
2.81333	0.00010721	0.000213906
2.815	0.000116009	0.000222491
2.81667	0.000125193	0.000230411
2.81833	0.000134725	0.000237722
2.82	0.000144558	0.000244408
2.82167	0.000154668	0.000250451
2.82333	0.000165057	0.000255903
2.825	0.00017571	0.000260858
2.82667	0.000186609	0.000265389
2.82833	0.000197699	0.000269567
2.83	0.000208909	0.000273389
2.83167	0.000220154	0.000276863
2.83333	0.000231341	0.000280016
2.835	0.000242413	0.00028293
2.83667	0.000253306	0.000285718
2.83833	0.00026396	0.000288458
2.84	0.000274287	0.000291288
2.84167	0.000283539	0.000293639
2.84333	0.000291068	0.000294843
2.845	0.000296915	0.000294899
2.84667	0.00030116	0.000293831
2.84833	0.000303884	0.000291664
2.85	0.000305153	0.000288428
2.85167	0.000305018	0.000284162
2.85333	0.000303547	0.000278887
2.855	0.00030083	0.000272661
2.85667	0.000296989	0.000265587
2.85833	0.000292146	0.000257827
2.86	0.000286419	0.00024946
2.86167	0.000279935	0.000240549
2.86333	0.000272815	0.000231142
2.865	0.000265232	0.000221307
2.86667	0.000257425	0.000211112
2.86833	0.000249645	0.000200649
2.87	0.000242081	0.000190055
2.87167	0.000234889	0.000179479
2.87333	0.000228258	0.000169002
2.875	0.000221982	0.000158748
2.87667	0.000215679	0.000148829
2.87833	0.000209361	0.000139283
2.88	0.000203062	0.000130126
2.88167	0.000196835	0.000121344
2.88333	0.00019071	0.000112931
2.885	0.000184679	0.000104913
2.88667	0.000178726	9.73569e-05
2.88833	0.000172846	9.02749e-05
2.89	0.000167041	8.36571e-05
2.89167	0.000161326	7.74515e-05
2.89333	0.00015569	7.16411e-05
2.895	0.000150133	6.61916e-05
2.89667	0.000144656	6.10366e-05
2.89833	0.000139252	5.61491e-05
2.9	0.000133888	5.15262e-05
2.90167	0.000128486	4.71828e-05
2.90333	0.000122975	4.30775e-05
2.905	0.000117308	3.91723e-05
2.90667	0.000111457	3.54188e-05
2.90833	0.000105659	3.1885e-05
2.91	0.000100182	2.8664e-05
2.91167	9.50221e-05	2.57408e-05
2.91333	9.01767e-05	2.30902e-05
2.915	8.56356e-05	2.06727e-05
2.91667	8.14009e-05	1.84414e-05
2.91833	7.74735e-05	1.63747e-05
2.92	7.38571e-05	1.4479e-05
2.92167	7.05418e-05	1.27849e-05
2.92333	6.75118e-05	1.13378e-05
2.925	6.47316e-05	1.01301e-05
2.92667	6.21614e-05	9.08305e-06
2.92833	5.97956e-05	8.16081e-06
2.93	5.76367e-05	7.37696e-06
2.93167	5.56807e-05	6.74819e-06
2.93333	5.39165e-05	6.24903e-06
2.935	5.23189e-05	5.82254e-06
2.93667	5.08679e-05	5.47491e-06
2.93833	4.95307e-05	5.24427e-06
2.94	4.82795e-05	5.14038e-06
2.94167	4.71175e-05	5.13617e-06
2.94333	4.60518e-05	5.22648e-06
2.945	4.50845e-05	5.40516e-06
2.94667	4.42015e-05	5.66896e-06
2.94833	4.33686e-05	5.97976e-06
2.95	4.25731e-05	6.34175e-06
2.95167	4.18233e-05	6.75893e-06
2.95333	4.11214e-05	7.21078e-06
2.955	4.04485e-05	7.62723e-06
2.95667	3.97571e-05	7.99486e-06
2.95833	3.90298e-05	8.35303e-06
2.96	3.8287e-05	8.73401e-06
2.96167	3.75611e-05	9.11729e-06
2.96333	3.68528e-05	9.42568e-06
2.965	3.61191e-05	9.60361e-06
2.96667	3.53275e-05	9.6551e-06
2.96833	3.44698e-05	9.60519e-06
2.97	3.35754e-05	9.49352e-06
2.97167	3.26645e-05	9.29944e-06
2.97333	3.17334e-05	9.00226e-06
2.975	3.08085e-05	8.62498e-06
2.97667	2.98952e-05	8.2159e-06
2.97833	2.89887e-05	7.78567e-06
2.98	2.80883e-05	7.34849e-06
2.98167	2.7201e-05	6.91471e-06
2.98333	2.63293e-05	6.48462e-06
2.985	2.54758e-05	6.04729e-06
2.98667	2.46414e-05	5.56427e-06
2.98833	2.38241e-05	5.02474e-06
2.99	2.30188e-05	4.47116e-06
2.99167	2.22159e-05	3.94569e-06
2.99333	2.14105e-05	3.46621e-06
2.995	2.05928e-05	3.03243e-06
2.99667	1.9758e-05	2.6411e-06
2.99833	1.88949e-05	2.28851e-06
3	1.8006e-05	1.93238e-06
3.00167	1.71058e-05	1.54799e-06
3.00333	1.62089e-05	1.14601e-06
3.005	1.53027e-05	7.6518e-07
3.00667	1.43626e-05	4.44393e-07
3.00833	1.34095e-05	2.00956e-07
3.01	1.24874e-05	5.64609e-08
3.01167	1.1598e-05	-3.54951e-11
3.01333	1.07398e-05	3.51402e-09
3.015	9.91262e-06	2.12616e-08
3.01667	9.11048e-06	3.17622e-08
3.01833	8.34085e-06	4.93619e-08
3.02	7.60519e-06	1.05858e-07
3.02167	6.90203e-06	2.08055e-07
3.02333	6.23879e-06	3.66747e-07
3.025	5.62151e-06	5.71288e-07
3.02667	5.05167e-06	8.49776e-07
3.02833	4.52171e-06	1.24821e-06
3.03	4.02249e-06	1.78418e-06
3.03167	3.54501e-06	2.41896e-06
3.03333	3.08158e-06	3.07488e-06
3.035	2.63684e-06	3.74485e-06
3.03667	2.23175e-06	4.46407e-06
3.03833	1.87234e-06	5.24333e-06
3.04	1.5541e-06	6.06489e-06
3.04167	1.2737e-06	6.89343e-06
3.04333	1.03103e-06	7.75004e-06
3.045	8.29026e-07	8.67386e-06
3.04667	6.45101e-07	9.66525e-06
3.04833	4.77804e-07	1.07e-05
3.05	3.16514e-07	1.17502e-05
3.05167	1.70272e-07	1.28268e-05
3.05333	5.72229e-08	1.39409e-05
3.055	-6.0065e-11	1.50854e-05
3.05667	5.94643e-09	1.62683e-05
3.05833	4.81816e-08	1.7479e-05
3.06	1.14506e-07	1.87248e-05
3.06167	1.98913e-07	1.99889e-05
3.06333	3.0292e-07	2.12573e-05
3.065	4.2501e-07	2.25231e-05
3.06667	5.57659e-07	2.37554e-05
3.06833	7.08454e-07	2.49647e-05
3.07	8.69744e-07	2.61482e-05
3.07167	1.05063e-06	2.73166e-05
3.07333	1.24208e-06	2.84951e-05
3.075	1.44431e-06	2.95928e-05
3.07667	1.65016e-06	3.05062e-05
3.07833	1.87627e-06	3.11991e-05
3.08	2.13621e-06	3.16313e-05
3.08167	2.41196e-06	3.18161e-05
3.08333	2.68998e-06	3.17981e-05
3.085	2.94173e-06	3.16679e-05
3.08667	3.18082e-06	3.147e-05
3.08833	3.41487e-06	3.12002e-05
3.09	3.64534e-06	3.08324e-05
3.09167	3.87089e-06	3.03375e-05
3.09333	4.09302e-06	2.97176e-05
3.095	4.33139e-06	2.90001e-05
3.09667	4.56949e-06	2.82191e-05
3.09833	4.78177e-06	2.74158e-05
3.1	4.95317e-06	2.65819e-05
3.10167	5.09271e-06	2.57553e-05
3.10333	5.22323e-06	2.49877e-05
3.105	5.3552e-06	2.43203e-05
3.10667	5.48273e-06	2.37519e-05
3.10833	5.58055e-06	2.31843e-05
3.11	5.62849e-06	2.25343e-05
3.11167	5.64204e-06	2.18023e-05
3.11333	5.63947e-06	2.10315e-05
3.115	5.63013e-06	2.02327e-05
3.11667	5.60073e-06	1.94385e-05
3.11833	5.53946e-06	1.86739e-05
3.12	5.45856e-06	1.80138e-05
3.12167	5.35696e-06	1.74551e-05
3.12333	5.23029e-06	1.6942e-05
3.125	5.08936e-06	1.64748e-05
3.12667	4.95414e-06	1.61427e-05
3.12833	4.86698e-06	1.60799e-05
3.13	4.84332e-06	1.63224e-05
3.13167	4.8758e-06	1.68706e-05
3.13333	4.94818e-06	1.77394e-05
3.135	5.04262e-06	1.89575e-05
3.13667	5.18049e-06	2.05747e-05
3.13833	5.39218e-06	2.26588e-05
3.14	5.69604e-06	2.53054e-05
3.14167	6.08689e-06	2.86377e-05
3.14333	6.54345e-06	3.27476e-05
3.145	7.06942e-06	3.77409e-05
3.14667	7.6819e-06	4.37131e-05
3.14833	8.41155e-06	5.06993e-05
3.15	9.28161e-06	5.8696e-05
3.15167	1.03228e-05	6.7707e-05
3.15333	1.15643e-05	7.78135e-05
3.155	1.30595e-05	8.91069e-05
3.15667	1.48782e-05	0.000101623
3.15833	1.70739e-05	0.000115389
3.16	1.96937e-05	0.000130371
3.16167	2.27745e-05	0.000146565
3.16333	2.63876e-05	0.000163918
3.165	3.06377e-05	0.000182332
3.16667	3.56277e-05	0.000201689
3.16833	4.14383e-05	0.000221836
3.17	4.81317e-05	0.000242666
3.17167	5.57719e-05	0.000264049
3.17333	6.44332e-05	0.000285837
3.175	7.41507e-05	0.00030732
3.17667	8.49622e-05	0.000327804
3.17833	9.69107e-05	0.000347219
3.18	0.000109992	0.000365531
3.18167	0.000124157	0.000382734
3.18333	0.000139323	0.000398804
3.185	0.00015539	0.000413716
3.18667	0.00017225	0.000427471
3.18833	0.000189773	0.000440047
3.19	0.000207803	0.00045146
3.19167	0.000226172	0.00046179
3.19333	0.000244726	0.000471143
3.195	0.0002633	0.000479527
3.19667	0.000281732	0.000486868
3.19833	0.0002999	0.000493119
3.2	0.00031772	0.000498265
3.20167	0.000335106	0.000502328
3.20333	0.00035197	0.000505286
3.205	0.000368237	0.000507096
3.20667	0.000383868	0.00050773
3.20833	0.000397404	0.000505202
3.21	0.000407593	0.000497786
3.21167	0.000414696	0.000485844
3.21333	0.000418972	0.000469749
3.215	0.000420657	0.000449958
3.21667	0.000419967	0.000426979
3.21833	0.000417098	0.000401368
3.22	0.000412227	0.000373688
3.22167	0.000405549	0.000344465
3.22333	0.000397232	0.000314307
3.225	0.000387464	0.00028383
3.22667	0.000376437	0.000253609
3.22833	0.000364359	0.000224193
3.23	0.000351464	0.000196183
3.23167	0.000338045	0.000170184
3.23333	0.000324458	0.000146718
3.235	0.000311131	0.000126314
3.23667	0.0002985	0.000109574
3.23833	0.000286943	9.70692e-05
3.24	0.000276809	8.93378e-05
3.24167	0.000267125	8.45411e-05
3.24333	0.00025678	8.05153e-05
3.245	0.000245954	7.72791e-05
3.24667	0.000234815	7.48337e-05
3.24833	0.000223497	7.31947e-05
3.25	0.000212102	7.22996e-05
3.25167	0.000200711	7.20686e-05
3.25333	0.000189442	7.24606e-05
3.255	0.000178391	7.35334e-05
3.25667	0.000167635	7.53126e-05
3.25833	0.000157241	7.77574e-05
3.26	0.000147276	8.07665e-05
3.26167	0.000137824	8.42357e-05
3.26333	0.00012893	8.812e-05
3.265	0.000120642	9.23822e-05
3.26667	0.000113012	9.69139e-05
3.26833	0.000106078	0.000101611
3.27	9.98676e-05	0.000106418
3.27167	9.44204e-05	0.000111265
3.27333	8.97765e-05	0.000116087
3.275	8.61284e-05	0.00012129
3.27667	8.35773e-05	0.000127249
3.27833	8.20558e-05	0.000133848
3.28	8.14873e-05	0.000140931
3.28167	8.17714e-05	0.000148347
3.28333	8.27848e-05	0.000155941
3.285	8.44073e-05	0.000163527
3.28667	8.65354e-05	0.000170945
3.28833	8.9085e-05	0.000178072
3.29	9.19918e-05	0.000184792
3.29167	9.51762e-05	0.000191042
3.29333	9.85241e-05	0.000196734
3.295	0.000101911	0.000201783
3.29667	0.000105218	0.000206086
3.29833	0.000108344	0.000209536
3.3	0.000111193	0.000212068
3.30167	0.000113688	0.00021364
3.30333	0.000115739	0.000214195
3.305	0.000117207	0.000213671
3.30667	0.000117957	0.000212044
3.30833	0.000118212	0.000209659
3.31	0.000118288	0.000206894
3.31167	0.000118203	0.000203791
3.31333	0.000117948	0.000200375
3.315	0.000117515	0.000196671
3.31667	0.000116909	0.000192731
3.31833	0.000116142	0.000188601
3.32	0.000115218	0.000184323
3.32167	0.000114133	0.000179923
3.32333	0.000112893	0.000175469
3.325	0.000111524	0.000171006
3.32667	0.000110057	0.000166549
3.32833	0.000108509	0.000162058
3.33	0.000106883	0.000157506
3.33167	0.000105169	0.00015292
3.33333	0.00010337	0.000148347
3.335	0.000101514	0.000143867
3.33667	9.96138e-05	0.000139519
3.33833	9.76622e-05	0.000135289
3.34	9.5643e-05	0.000131142
3.34167	9.35823e-05	0.00012708
3.34333	9.15205e-05	0.000123132
3.345	8.94586e-05	0.00011932
3.34667	8.73946e-05	0.000115662
3.34833	8.53549e-05	0.000112159
3.35	8.33648e-05	0.000108839
3.35167	8.14311e-05	0.000105715
3.35333	7.95414e-05	0.000102786
3.355	7.76964e-05	0.000100015
3.35667	7.59138e-05	9.73403e-05
3.35833	7.4193e-05	9.47332e-05
3.36	7.25396e-05	9.22187e-05
3.36167	7.09528e-05	8.98288e-05
3.36333	6.94489e-05	8.75887e-05
3.365	6.80135e-05	8.54561e-05
3.36667	6.66388e-05	8.34137e-05
3.36833	6.53211e-05	8.14794e-05
3.37	6.40658e-05	7.96534e-05
3.37167	6.28906e-05	7.79361e-05
3.37333	6.18009e-05	7.62748e-05
3.375	6.07767e-05	7.46504e-05
3.37667	5.97875e-05	7.30251e-05
3.37833	5.88291e-05	7.14394e-05
3.38	5.79202e-05	6.99372e-05
3.38167	5.70685e-05	6.84887e-05
3.38333	5.6258e-05	6.70776e-05
3.385	5.54738e-05	6.56991e-05
3.38667	5.47012e-05	6.43898e-05
3.38833	5.39422e-05	6.31374e-05
3.39	5.31942e-05	6.19402e-05
3.39167	5.24619e-05	6.08033e-05
3.39333	5.17625e-05	5.97357e-05
3.395	5.10797e-05	5.87248e-05
3.39667	5.04002e-05	5.77477e-05
3.39833	4.97261e-05	5.68062e-05
3.4	4.90622e-05	5.59408e-05
3.40167	4.84163e-05	5.51603e-05
3.40333	4.77723e-05	5.44664e-05
3.405	4.71246e-05	5.38395e-05
3.40667	4.6478e-05	5.32215e-05
3.40833	4.58253e-05	5.25907e-05
3.41	4.51785e-05	5.19369e-05
3.41167	4.45533e-05	5.12993e-05
3.41333	4.39622e-05	5.0721e-05
3.415	4.341e-05	5.01852e-05
3.41667	4.28639e-05	4.96821e-05
3.41833	4.23019e-05	4.92267e-05
3.42	4.17182e-05	4.88406e-05
3.42167	4.11254e-05	4.8486e-05
3.42333	4.05494e-05	4.8065e-05
3.425	4.00073e-05	4.75464e-05
3.42667	3.95025e-05	4.69663e-05
3.42833	3.90218e-05	4.64174e-05
3.43	3.85551e-05	4.59459e-05
3.43167	3.81104e-05	4.55316e-05
3.43333	3.76669e-05	4.51119e-05
3.435	3.72251e-05	4.46699e-05
3.43667	3.67793e-05	4.41991e-05
3.43833	3.63586e-05	4.36934e-05
3.44	3.59784e-05	4.309e-05
3.44167	3.56192e-05	4.2395e-05
3.44333	3.52496e-05	4.16438e-05
3.445	3.48608e-05	4.08527e-05
3.44667	3.44785e-05	4.00918e-05
3.44833	3.41332e-05	3.93631e-05
3.45	3.38311e-05	3.86621e-05
3.45167	3.35768e-05	3.79564e-05
3.45333	3.33435e-05	3.72201e-05
3.455	3.30816e-05	3.64768e-05
3.45667	3.27671e-05	3.57327e-05
3.45833	3.24184e-05	3.4976e-05
3.46	3.2084e-05	3.42201e-05
3.46167	3.1779e-05	3.3492e-05
3.46333	3.14916e-05	3.28189e-05
3.465	3.11948e-05	3.21752e-05
3.46667	3.08799e-05	3.15138e-05
3.46833	3.0547e-05	3.08447e-05
3.47	3.01828e-05	3.01807e-05
3.47167	2.97678e-05	2.94996e-05
3.47333	2.93098e-05	2.87618e-05
3.475	2.8876e-05	2.79434e-05
3.47667	2.85106e-05	2.70878e-05
3.47833	2.81871e-05	2.62648e-05
3.48	2.7882e-05	2.55371e-05
3.48167	2.75779e-05	2.49037e-05
3.48333	2.72771e-05	2.43151e-05
3.485	2.69862e-05	2.37311e-05
3.48667	2.66953e-05	2.31266e-05
3.48833	2.64037e-05	2.24868e-05
3.49	2.61059e-05	2.18213e-05
3.49167	2.57908e-05	2.11824e-05
3.49333	2.54406e-05	2.06151e-05
3.495	2.50579e-05	2.0073e-05
3.49667	2.46416e-05	1.95408e-05
3.49833	2.41759e-05	1.90147e-05
3.5	2.36555e-05	1.85326e-05
3.50167	2.30553e-05	1.80583e-05
3.50333	2.23701e-05	1.75208e-05
3.505	2.15991e-05	1.6898e-05
3.50667	2.07639e-05	1.62455e-05
3.50833	1.9918e-05	1.56362e-05
3.51	1.90828e-05	1.50704e-05
3.51167	1.82456e-05	1.45358e-05
3.51333	1.74123e-05	1.40445e-05
3.515	1.65961e-05	1.35666e-05
3.51667	1.57994e-05	1.30758e-05
3.51833	1.49904e-05	1.25454e-05
3.52	1.41671e-05	1.2016e-05
3.52167	1.33397e-05	1.14965e-05
3.52333	1.25214e-05	1.09851e-05
3.525	1.17011e-05	1.05151e-05
3.52667	1.08833e-05	1.01167e-05
3.52833	1.00988e-05	9.79856e-06
3.53	9.35818e-06	9.50601e-06
3.53167	8.65028e-06	9.20562e-06
3.53333	7.95523e-06	8.89901e-06
3.535	7.26807e-06	8.595e-06
3.53667	6.59445e-06	8.30599e-06
3.53833	5.92189e-06	7.98418e-06
3.54	5.24863e-06	7.6563e-06
3.54167	4.57477e-06	7.33566e-06
3.54333	3.91001e-06	7.12189e-06
3.545	3.27237e-06	7.03514e-06
3.54667	2.67393e-06	7.04941e-06
3.54833	2.12974e-06	7.08618e-06
3.55	1.65188e-06	7.09476e-06
3.55167	1.24938e-06	7.06704e-06
3.55333	9.14724e-07	7.00542e-06
3.555	6.2382e-07	6.95444e-06
3.55667	3.69081e-07	6.94118e-06
3.55833	1.65556e-07	6.98935e-06
3.56	4.04313e-08	7.07989e-06
3.56167	-2.86415e-10	7.18368e-06
3.56333	2.83551e-08	7.23244e-06
3.565	1.06756e-07	7.18271e-06
3.56667	2.28846e-07	7.07917e-06
3.56833	4.29336e-07	6.98767e-06
3.57	7.4591e-07	6.99875e-06
3.57167	1.20569e-06	7.1006e-06
3.57333	1.79509e-06	7.24638e-06
3.575	2.49523e-06	7.34977e-06
3.57667	3.27383e-06	7.40939e-06
3.57833	4.11601e-06	7.41441e-06
3.58	5.03539e-06	7.40293e-06
3.58167	6.05478e-06	7.39223e-06
3.58333	7.18646e-06	7.39602e-06
3.585	8.40488e-06	7.39593e-06
3.58667	9.66808e-06	7.38467e-06
3.58833	1.09535e-05	7.3934e-06
3.59	1.2275e-05	7.38986e-06
3.59167	1.36658e-05	7.34175e-06
3.59333	1.51247e-05	7.21015e-06
3.595	1.66336e-05	7.02592e-06
3.59667	1.81701e-05	6.82749e-06
3.59833	1.97072e-05	6.64276e-06
3.6	2.11969e-05	6.49225e-06
3.60167	2.25912e-05	6.33305e-06
3.60333	2.38916e-05	6.1367e-06
3.605	2.51239e-05	5.90274e-06
3.60667	2.62974e-05	5.67977e-06
3.60833	2.75611e-05	5.50667e-06
3.61	2.90067e-05	5.36692e-06
3.61167	3.0561e-05	5.19436e-06
3.61333	3.21809e-05	4.95819e-06
3.615	3.38343e-05	4.72299e-06
3.61667	3.55158e-05	4.50733e-06
3.61833	3.71958e-05	4.31931e-06
3.62	3.88165e-05	4.11393e-06
3.62167	4.03093e-05	3.87116e-06
3.62333	4.16507e-05	3.62349e-06
3.625	4.28701e-05	3.37575e-06
3.62667	4.39699e-05	3.17464e-06
3.62833	4.48889e-05	3.04939e-06
3.63	4.55662e-05	2.94789e-06
3.63167	4.59858e-05	2.83607e-06
3.63333	4.61575e-05	2.69022e-06
3.635	4.60897e-05	2.60303e-06
3.63667	4.57771e-05	2.60359e-06
3.63833	4.52023e-05	2.63992e-06
3.64	4.43344e-05	2.66747e-06
3.64167	4.32481e-05	2.65543e-06
3.64333	4.20604e-05	2.63955e-06
3.645	4.08032e-05	2.63994e-06
3.64667	3.95025e-05	2.68054e-06
3.64833	3.81811e-05	2.77495e-06
3.65	3.68482e-05	2.87627e-06
3.65167	3.55178e-05	2.9487e-06
3.65333	3.41932e-05	2.99149e-06
3.655	3.28655e-05	3.0425e-06
3.65667	3.15457e-05	3.14e-06
3.65833	3.02474e-05	3.29716e-06
3.66	2.89907e-05	3.48512e-06
3.66167	2.77863e-05	3.66069e-06
3.66333	2.66465e-05	3.78805e-06
3.665	2.55611e-05	3.88392e-06
3.66667	2.45152e-05	3.97224e-06
3.66833	2.34761e-05	4.05241e-06
3.67	2.2456e-05	4.13402e-06
3.67167	2.14943e-05	4.26248e-06
3.67333	2.06079e-05	4.40847e-06
3.675	1.97789e-05	4.56786e-06
3.67667	1.89671e-05	4.69272e-06
3.67833	1.81744e-05	4.79123e-06
3.68	1.74327e-05	4.86803e-06
3.68167	1.67489e-05	4.92745e-06
3.68333	1.61188e-05	4.99556e-06
3.685	1.5511e-05	5.11543e-06
3.68667	1.49204e-05	5.313e-06
3.68833	1.43561e-05	5.53625e-06
3.69	1.38278e-05	5.72649e-06
3.69167	1.33391e-05	5.85643e-06
3.69333	1.28753e-05	5.94473e-06
3.695	1.24384e-05	6.01732e-06
3.69667	1.20363e-05	6.08208e-06
3.69833	1.16832e-05	6.12264e-06
3.7	1.13615e-05	6.09762e-06
3.70167	1.10505e-05	6.00797e-06
3.70333	1.07417e-05	5.83375e-06
3.705	1.0437e-05	5.59024e-06
3.70667	1.0143e-05	5.32747e-06
3.70833	9.86645e-06	5.11547e-06
3.71	9.60791e-06	4.95471e-06
3.71167	9.36569e-06	4.78178e-06
3.71333	9.14263e-06	4.56479e-06
3.715	8.9417e-06	4.33883e-06
3.71667	8.75959e-06	4.1109e-06
3.71833	8.57372e-06	3.9056e-06
3.72	8.38992e-06	3.74042e-06
3.72167	8.21859e-06	3.59411e-06
3.72333	8.06865e-06	3.42782e-06
3.725	7.9174e-06	3.1956e-06
3.72667	7.74654e-06	2.9324e-06
3.72833	7.56499e-06	2.70201e-06
3.73	7.38779e-06	2.51098e-06
3.73167	7.22827e-06	2.32076e-06
3.73333	7.07422e-06	2.09915e-06
3.735	6.91507e-06	1.86749e-06
3.73667	6.74753e-06	1.65379e-06
3.73833	6.56862e-06	1.43678e-06
3.74	6.39609e-06	1.20588e-06
3.74167	6.23404e-06	9.90688e-07
3.74333	6.08212e-06	8.10846e-07
3.745	5.9254e-06	6.9105e-07
3.74667	5.7416e-06	6.13404e-07
3.74833	5.54145e-06	5.64007e-07
3.75	5.33573e-06	5.21708e-07
3.75167	5.13524e-06	4.51162e-07
3.75333	4.94324e-06	3.48966e-07
3.755	4.77054e-06	2.3967e-07
3.75667	4.62633e-06	1.86723e-07
3.75833	4.49581e-06	2.07873e-07
3.76	4.35062e-06	2.32571e-07
3.76167	4.2015e-06	1.97372e-07
3.76333	4.08339e-06	9.16262e-08
3.765	4.00094e-06	6.88161e-09
3.76667	3.94245e-06	-6.95112e-11
3.76833	3.88848e-06	4.91799e-08
3.77	3.82725e-06	8.09776e-08
3.77167	3.76196e-06	8.45271e-08
3.77333	3.68381e-06	1.09226e-07
3.775	3.59963e-06	1.90273e-07
3.77667	3.51204e-06	3.66565e-07
3.77833	3.43645e-06	5.99354e-07
3.78	3.39257e-06	8.56694e-07
3.78167	3.38071e-06	1.11418e-06
3.78333	3.38606e-06	1.38912e-06
3.785	3.38768e-06	1.69246e-06
3.78667	3.3602e-06	2.03794e-06
3.78833	3.30684e-06	2.42587e-06
3.79	3.252e-06	2.84545e-06
3.79167	3.22296e-06	3.28619e-06
3.79333	3.22004e-06	3.76936e-06
3.795	3.22085e-06	4.29824e-06
3.79667	3.20444e-06	4.86246e-06
3.79833	3.17263e-06	5.43009e-06
3.8	3.11814e-06	6.00836e-06
3.80167	3.03653e-06	6.62539e-06
3.80333	2.92666e-06	7.27421e-06
3.805	2.80829e-06	7.92303e-06
3.80667	2.69679e-06	8.50485e-06
3.80833	2.5943e-06	9.02812e-06
3.81	2.48726e-06	9.49948e-06
3.81167	2.35613e-06	9.91536e-06
3.81333	2.19332e-06	1.02786e-05
3.815	2.00939e-06	1.06099e-05
3.81667	1.8481e-06	1.09301e-05
3.81833	1.71994e-06	1.11822e-05
3.82	1.59785e-06	1.13306e-05
3.82167	1.45616e-06	1.1403e-05
3.82333	1.29184e-06	1.14168e-05
3.825	1.12303e-06	1.13606e-05
3.82667	9.66224e-07	1.12237e-05
3.82833	8.26051e-07	1.10338e-05
3.83	7.03961e-07	1.08502e-05
3.83167	5.8636e-07	1.07292e-05
3.83333	4.62753e-07	1.06667e-05
3.835	3.37628e-07	1.0662e-05
3.83667	2.26097e-07	1.07045e-05
3.83833	1.38655e-07	1.08253e-05
3.84	7.53657e-08	1.11051e-05
3.84167	2.86415e-08	1.16215e-05
3.84333	0	1.25072e-05
3.845	0	1.38392e-05
3.84667	2.11176e-08	1.5719e-05
3.84833	4.97591e-08	1.82799e-05
3.85	1.05525e-07	2.16586e-05
3.85167	2.26097e-07	2.60483e-05
3.85333	4.29623e-07	3.1681e-05
3.855	7.00926e-07	3.88945e-05
3.85667	1.03558e-06	4.81217e-05
3.85833	1.46672e-06	5.98169e-05
3.86	2.05764e-06	7.44304e-05
3.86167	2.85353e-06	9.25155e-05
3.86333	3.89069e-06	0.000114755
3.865	5.2187e-06	0.000141995
3.86667	6.92062e-06	0.000175176
3.86833	9.08827e-06	0.000215334
3.87	1.18062e-05	0.000263614
3.87167	1.51692e-05	0.000321285
3.87333	1.93419e-05	0.000389757
3.875	2.45261e-05	0.000470342
3.87667	3.09786e-05	0.000564475
3.87833	3.90145e-05	0.000673927
3.88	4.89881e-05	0.000800519
3.88167	6.13381e-05	0.000946038
3.88333	7.65877e-05	0.00111224
3.885	9.53822e-05	0.00130075
3.88667	0.000118474	0.00151302
3.88833	0.000146733	0.0017503
3.89	0.000181128	0.00201359
3.89167	0.000222761	0.00230349
3.89333	0.000272907	0.00262022
3.895	0.000332979	0.00296354
3.89667	0.000404508	0.00333276
3.89833	0.000489115	0.00372663
3.9	0.000588497	0.0041433
3.90167	0.000704346	0.00458036
3.90333	0.000838293	0.00503483
3.905	0.000991867	0.00550325
3.90667	0.00116644	0.00598169
3.90833	0.00136145	0.0064407
3.91	0.00157611	0.0068538
3.91167	0.00181086	0.00722095
3.91333	0.0020656	0.00754198
3.915	0.00233971	0.00781682
3.91667	0.00263201	0.00804551
3.91833	0.00294077	0.00822819
3.92	0.00326367	0.00836545
3.92167	0.00359779	0.00845826
3.92333	0.00393965	0.0085082
3.925	0.00428519	0.00851742
3.92667	0.00462983	0.00848901
3.92833	0.00496887	0.00842693
3.93	0.00529773	0.00833596
3.93167	0.00561196	0.00822157
3.93333	0.00590729	0.00808978
3.935	0.00617991	0.00794734
3.93667	0.00642656	0.0078015
3.93833	0.00664452	0.00766004
3.94	0.00683174	0.00753069
3.94167	0.00697749	0.00740958
3.94333	0.0070735	0.0072876
3.945	0.00712268	0.00716486
3.94667	0.00712846	0.00704129
3.94833	0.00709439	0.00691664
3.95	0.00702396	0.00679086
3.95167	0.00692072	0.00666379
3.95333	0.0067886	0.00653524
3.955	0.00663158	0.00640474
3.95667	0.0064535	0.00627165
3.95833	0.00625808	0.00613512
3.96	0.00604889	0.00599421
3.96167	0.00582969	0.00584791
3.96333	0.00560412	0.00569493
3.965	0.00537614	0.00553379
3.96667	0.00514964	0.00536287
3.96833	0.00492835	0.00518056
3.97	0.00471577	0.00498523
3.97167	0.00451525	0.00477505
3.97333	0.00432996	0.00454792
3.975	0.00416064	0.0043143
3.97667	0.0040053	0.00408652
3.97833	0.00386305	0.00386512
3.98	0.0037331	0.00365052
3.98167	0.0036146	0.0034431
3.98333	0.00350659	0.00324323
3.985	0.00340779	0.00305112
3.98667	0.0033167	0.00286683
3.98833	0.00323195	0.00269036
3.99	0.00315226	0.00252173
3.99167	0.00307639	0.00236089
3.99333	0.00300304	0.00220773
3.995	0.00293082	0.00206213
3.99667	0.00285818	0.0019239
3.99833	0.00278343	0.0017928
4	0.00270484	0.00166861
4.00167	0.00262074	0.00155108
4.00333	0.00252954	0.00144001
4.005	0.00242963	0.00133512
4.00667	0.00231929	0.00123615
4.00833	0.00220512	0.00114367
4.01	0.00209484	0.00105817
4.01167	0.00198842	0.000979308
4.01333	0.00188581	0.000906673
4.015	0.00178701	0.000839956
4.01667	0.00169198	0.000778892
4.01833	0.00160069	0.000723195
4.02	0.0015131	0.000672524
4.02167	0.00142912	0.000626493
4.02333	0.00134859	0.00058476
4.025	0.00127138	0.000546948
4.02667	0.00119737	0.000512654
4.02833	0.0011265	0.000481521
4.03	0.00105867	0.0004532
4.03167	0.000993779	0.00042734
4.03333	0.000931664	0.00040352
4.035	0.000872162	0.000381407
4.03667	0.000815136	0.000360713
4.03833	0.000760435	0.000341175
4.04	0.000707902	0.000322467
4.04167	0.000658143	0.000304848
4.04333	0.000611774	0.00028862
4.045	0.000568652	0.000273508
4.04667	0.000528605	0.000259319
4.04833	0.000491459	0.000245854
4.05	0.000457015	0.000232924
4.05167	0.000425086	0.000220359
4.05333	0.000395503	0.000208054
4.055	0.000368082	0.000195942
4.05667	0.000342638	0.000183963
4.05833	0.000318984	0.000172071
4.06	0.000296956	0.000160225
4.06167	0.000276387	0.000148385
4.06333	0.000257073	0.000136573
4.065	0.000238832	0.000124831
4.06667	0.000221507	0.000113177
4.06833	0.000204989	0.000101643
4.07	0.000189149	9.02931e-05
4.07167	0.000173826	7.92639e-05
4.07333	0.000158878	6.86336e-05
4.075	0.000144521	5.84994e-05
4.07667	0.000131031	4.89366e-05
4.07833	0.000118354	3.9952e-05
4.08	0.000106412	3.16657e-05
4.08167	9.51257e-05	2.42043e-05
4.08333	8.44471e-05	1.76775e-05
4.085	7.4385e-05	1.21345e-05
4.08667	6.49454e-05	7.56823e-06
4.08833	5.61164e-05	4.03854e-06
4.09	4.78632e-05	1.58435e-06
4.09167	4.01813e-05	2.40856e-07
4.09333	3.30919e-05	-2.43289e-09
4.095	2.6619e-05	8.82578e-07
4.09667	2.07822e-05	2.96304e-06
4.09833	1.56072e-05	6.28464e-06
4.1	1.1118e-05	1.08122e-05
4.10167	7.3344e-06	1.64646e-05
4.10333	4.28183e-06	2.32171e-05
4.105	2.00114e-06	3.10556e-05
4.10667	5.54013e-07	3.99449e-05
4.10833	-3.76892e-09	4.97441e-05
4.11	3.73123e-07	6.03427e-05
4.11167	1.71169e-06	7.17117e-05
4.11333	4.03462e-06	8.37722e-05
4.115	7.37512e-06	9.63929e-05
4.11667	1.17874e-05	0.000109382
4.11833	1.73197e-05	0.000122609
4.12	2.40127e-05	0.000135926
4.12167	3.1886e-05	0.000149232
4.12333	4.09592e-05	0.000162388
4.125	5.12323e-05	0.000175261
4.12667	6.26767e-05	0.000187745
4.12833	7.52578e-05	0.000199716
4.13	8.89528e-05	0.000211094
4.13167	0.000103739	0.000221718
4.13333	0.000119584	0.000231384
4.135	0.000136419	0.000239939
4.13667	0.000154125	0.000247299
4.13833	0.000172584	0.000253476
4.14	0.000191671	0.000258434
4.14167	0.000210528	0.00026296
4.14333	0.00022838	0.000267697
4.145	0.000245231	0.000272398
4.14667	0.00026108	0.000276906
4.14833	0.000275875	0.000281163
4.15	0.000289597	0.000285138
4.15167	0.000302238	0.000288716
4.15333	0.000313801	0.000291736
4.155	0.000324285	0.00029409
4.15667	0.000333666	0.000295724
4.15833	0.000341923	0.000296585
4.16	0.000349019	0.000296615
4.16167	0.000354958	0.000295777
4.16333	0.000359782	0.00029404
4.165	0.00036357	0.000291329
4.16667	0.00036639	0.000287576
4.16833	0.000368336	0.000282725
4.17	0.000369519	0.000276793
4.17167	0.000370062	0.000269757
4.17333	0.000370082	0.000261553
4.175	0.000370103	0.000252666
4.17667	0.000370459	0.000243682
4.17833	0.000371026	0.000234679
4.18	0.000371683	0.000225777
4.18167	0.000372302	0.000217147
4.18333	0.000372759	0.000208883
4.185	0.000372935	0.000200938
4.18667	0.000372721	0.000193223
4.18833	0.000372019	0.000185707
4.19	0.000370774	0.00017843
4.19167	0.000368921	0.000171429
4.19333	0.000366364	0.0001647
4.195	0.000362982	0.000158245
4.19667	0.000358673	0.000152062
4.19833	0.000353341	0.000146162
4.2	0.000346896	0.00014055
4.20167	0.000339237	0.000135244
4.20333	0.000330244	0.000130187
4.205	0.000319772	0.000125321
4.20667	0.000307691	0.000120537
4.20833	0.000294795	0.000115817
4.21	0.000282006	0.000111203
4.21167	0.000269375	0.00010674
4.21333	0.000256939	0.000102493
4.215	0.000244747	9.84393e-05
4.21667	0.000232841	9.44922e-05
4.21833	0.000221257	9.06287e-05
4.22	0.000210019	8.68543e-05
4.22167	0.000199148	8.31638e-05
4.22333	0.000188654	7.9538e-05
4.225	0.000178554	7.59712e-05
4.22667	0.00016886	7.25077e-05
4.22833	0.000159576	6.9174e-05
4.23	0.000150712	6.59577e-05
4.23167	0.000142253	6.28431e-05
4.23333	0.000134174	5.98848e-05
4.235	0.000126435	5.71198e-05
4.23667	0.000119008	5.45852e-05
4.23833	0.000111872	5.22264e-05
4.24	0.000105047	5.00134e-05
4.24167	9.85756e-05	4.79428e-05
4.24333	9.24937e-05	4.60172e-05
4.245	8.67915e-05	4.42447e-05
4.24667	8.14564e-05	4.26151e-05
4.24833	7.64604e-05	4.11435e-05
4.25	7.17503e-05	3.98622e-05
4.25167	6.73028e-05	3.87402e-05
4.25333	6.31171e-05	3.77042e-05
4.255	5.92363e-05	3.6688e-05
4.25667	5.56884e-05	3.57202e-05
4.25833	5.24651e-05	3.48267e-05
4.26	4.95341e-05	3.39937e-05
4.26167	4.6836e-05	3.32007e-05
4.26333	4.43626e-05	3.24276e-05
4.265	4.20845e-05	3.16926e-05
4.26667	4.00071e-05	3.09929e-05
4.26833	3.81252e-05	3.03292e-05
4.27	3.64532e-05	2.96388e-05
4.27167	3.49979e-05	2.88694e-05
4.27333	3.37333e-05	2.79793e-05
4.275	3.26443e-05	2.70396e-05
4.27667	3.17057e-05	2.60958e-05
4.27833	3.08935e-05	2.51817e-05
4.28	3.01839e-05	2.43349e-05
4.28167	2.95681e-05	2.35434e-05
4.28333	2.9039e-05	2.27665e-05
4.285	2.85787e-05	2.19327e-05
4.28667	2.81723e-05	2.10262e-05
4.28833	2.77917e-05	2.01021e-05
4.29	2.74279e-05	1.92014e-05
4.29167	2.70858e-05	1.83116e-05
4.29333	2.67522e-05	1.74143e-05
4.295	2.64092e-05	1.64969e-05
4.29667	2.6027e-05	1.5544e-05
4.29833	2.56073e-05	1.45578e-05
4.3	2.51399e-05	1.35334e-05
4.30167	2.4604e-05	1.25044e-05
4.30333	2.40059e-05	1.14799e-05
4.305	2.33443e-05	1.04518e-05
4.30667	2.26226e-05	9.41467e-06
4.30833	2.1859e-05	8.39212e-06
4.31	2.10895e-05	7.44366e-06
4.31167	2.03379e-05	6.58675e-06
4.31333	1.96277e-05	5.81798e-06
4.315	1.89542e-05	5.05987e-06
4.31667	1.82894e-05	4.27365e-06
4.31833	1.76105e-05	3.51909e-06
4.32	1.6917e-05	2.82442e-06
4.32167	1.6225e-05	2.21789e-06
4.32333	1.5549e-05	1.65012e-06
4.325	1.48826e-05	1.14239e-06
4.32667	1.42013e-05	7.12162e-07
4.32833	1.34923e-05	3.66676e-07
4.33	1.27524e-05	1.44536e-07
4.33167	1.20051e-05	4.57414e-08
4.33333	1.12741e-05	2.81417e-08
4.335	1.05754e-05	1.0542e-08
4.33667	9.90268e-06	-1.06485e-10
4.33833	9.22978e-06	7.39895e-08
4.34	8.54261e-06	3.13729e-07
4.34167	7.85073e-06	8.5756e-07
4.34333	7.18293e-06	1.75655e-06
4.345	6.54978e-06	2.92977e-06
4.34667	5.96646e-06	4.34214e-06
4.34833	5.42524e-06	5.95503e-06
4.35	4.90672e-06	7.7437e-06
4.35167	4.40774e-06	9.66953e-06
4.35333	3.93139e-06	1.17079e-05
4.355	3.47313e-06	1.38521e-05
4.35667	3.02846e-06	1.60807e-05
4.35833	2.60788e-06	1.83411e-05
4.36	2.23099e-06	2.05735e-05
4.36167	1.91593e-06	2.27074e-05
4.36333	1.64159e-06	2.47288e-05
4.365	1.38382e-06	2.66096e-05
4.36667	1.12453e-06	2.82901e-05
4.36833	8.56258e-07	2.97525e-05
4.37	5.98485e-07	3.09653e-05
4.37167	3.82883e-07	3.18864e-05
4.37333	2.29117e-07	3.24205e-05
4.375	1.72857e-07	3.26687e-05
4.37667	2.40609e-07	3.27648e-05
4.37833	4.00762e-07	3.27289e-05
4.38	6.44087e-07	3.2493e-05
4.38167	9.66097e-07	3.19996e-05
4.38333	1.37432e-06	3.12473e-05
4.385	1.85649e-06	3.03162e-05
4.38667	2.38245e-06	2.93179e-05
4.38833	2.93564e-06	2.82372e-05
4.39	3.48584e-06	2.69953e-05
4.39167	4.04191e-06	2.55455e-05
4.39333	4.613e-06	2.3964e-05
4.395	5.19294e-06	2.24153e-05
4.39667	5.76205e-06	2.09302e-05
4.39833	6.28867e-06	1.9437e-05
4.4	6.75611e-06	1.7864e-05
4.40167	7.15386e-06	1.6224e-05
4.40333	7.47423e-06	1.46006e-05
4.405	7.71411e-06	1.30245e-05
4.40667	7.87661e-06	1.14592e-05
4.40833	7.98762e-06	9.9042e-06
4.41	8.0597e-06	8.38442e-06
4.41167	8.06873e-06	6.92809e-06
4.41333	8.00111e-06	5.55295e-06
4.415	7.8869e-06	4.2871e-06
4.41667	7.73974e-06	3.19045e-06
4.41833	7.56555e-06	2.30884e-06
4.42	7.35534e-06	1.62837e-06
4.42167	7.091e-06	1.0924e-06
4.42333	6.77246e-06	6.51665e-07
4.425	6.39671e-06	3.02482e-07
4.42667	5.96822e-06	6.98411e-08
4.42833	5.4976e-06	-7.05465e-10
4.43	4.99685e-06	1.2619e-07
4.43167	4.48547e-06	4.36476e-07
4.43333	3.99366e-06	8.91405e-07
4.435	3.53653e-06	1.42738e-06
4.43667	3.10494e-06	2.06555e-06
4.43833	2.67023e-06	2.87662e-06
4.44	2.21879e-06	3.90627e-06
4.44167	1.76204e-06	5.13017e-06
4.44333	1.31737e-06	6.47501e-06
4.445	9.14875e-07	7.94855e-06
4.44667	5.6966e-07	9.5445e-06
4.44833	2.98356e-07	1.12175e-05
4.45	1.11396e-07	1.29401e-05
4.45167	1.33951e-08	1.47235e-05
4.45333	-1.35304e-10	1.66001e-05
4.455	6.01193e-08	1.85637e-05
4.45667	1.61155e-07	2.05476e-05
4.45833	3.11886e-07	2.24822e-05
4.46	5.3046e-07	2.43505e-05
4.46167	8.65116e-07	2.61812e-05
4.46333	1.34602e-06	2.7993e-05
4.465	1.98062e-06	2.97437e-05
4.46667	2.7645e-06	3.13745e-05
4.46833	3.68855e-06	3.28398e-05
4.47	4.74221e-06	3.41372e-05
4.47167	5.91348e-06	3.52811e-05
4.47333	7.21139e-06	3.62617e-05
4.475	8.63717e-06	3.72145e-05
4.47667	1.01808e-05	3.82813e-05
4.47833	1.18378e-05	3.94258e-05
4.48	1.35988e-05	4.06189e-05
4.48167	1.54607e-05	4.17611e-05
4.48333	1.74175e-05	4.2788e-05
4.485	1.94734e-05	4.36424e-05
4.48667	2.16329e-05	4.43408e-05
4.48833	2.38838e-05	4.49319e-05
4.49	2.61974e-05	4.54113e-05
4.49167	2.85507e-05	4.57641e-05
4.49333	3.09394e-05	4.59257e-05
4.495	3.33571e-05	4.58743e-05
4.49667	3.57856e-05	4.55983e-05
4.49833	3.81841e-05	4.50969e-05
4.5	4.05148e-05	4.43411e-05
4.50167	4.2761e-05	4.32557e-05
4.50333	4.49181e-05	4.18295e-05
4.505	4.69828e-05	4.01004e-05
4.50667	4.89369e-05	3.81238e-05
4.50833	5.07441e-05	3.60039e-05
4.51	5.23724e-05	3.38171e-05
4.51167	5.38011e-05	3.15282e-05
4.51333	5.50141e-05	2.91724e-05
4.515	5.59936e-05	2.68517e-05
4.51667	5.67324e-05	2.46368e-05
4.51833	5.72445e-05	2.2556e-05
4.52	5.75317e-05	2.05596e-05
4.52167	5.76035e-05	1.86123e-05
4.52333	5.74541e-05	1.6739e-05
4.525	5.70749e-05	1.49959e-05
4.52667	5.64497e-05	1.33971e-05
4.52833	5.55683e-05	1.18825e-05
4.53	5.44627e-05	1.04312e-05
4.53167	5.31814e-05	9.0606e-06
4.53333	5.17687e-05	7.7883e-06
4.535	5.02128e-05	6.59306e-06
4.53667	4.85245e-05	5.46434e-06
4.53833	4.67299e-05	4.45505e-06
4.54	4.48475e-05	3.59665e-06
4.54167	4.29105e-05	2.87034e-06
4.54333	4.09422e-05	2.24976e-06
4.545	3.89495e-05	1.68554e-06
4.54667	3.69644e-05	1.18476e-06
4.54833	3.50073e-05	7.72279e-07
4.55	3.30968e-05	4.54893e-07
4.55167	3.12306e-05	2.36303e-07
4.55333	2.94062e-05	7.761e-08
4.555	2.76183e-05	3.51402e-09
4.55667	2.58614e-05	-3.54951e-11
4.55833	2.41497e-05	3.53117e-08
4.56	2.25035e-05	7.40605e-08
4.56167	2.094e-05	7.40605e-08
4.56333	1.94551e-05	6.00104e-08
4.565	1.803e-05	7.0511e-08
4.56667	1.66458e-05	1.51706e-07
4.56833	1.52803e-05	2.82151e-07
4.57	1.39115e-05	4.05496e-07
4.57167	1.25282e-05	4.83142e-07
4.57333	1.11474e-05	5.04291e-07
4.575	9.82085e-06	5.13828e-07
4.57667	8.60437e-06	5.3473e-07
4.57833	7.50847e-06	5.62679e-07
4.58	6.5241e-06	6.24857e-07
4.58167	5.60757e-06	7.69746e-07
4.58333	4.72424e-06	9.82379e-07
4.585	3.89667e-06	1.18405e-06
4.58667	3.17007e-06	1.26483e-06
4.58833	2.5626e-06	1.26952e-06
4.59	2.04098e-06	1.32053e-06
4.59167	1.57823e-06	1.48056e-06
4.59333	1.17269e-06	1.72382e-06
4.595	8.27542e-07	1.96852e-06
4.59667	5.41126e-07	2.18889e-06
4.59833	3.10477e-07	2.37705e-06
4.6	1.40145e-07	2.58134e-06
4.60167	4.06273e-08	2.7868e-06
4.60333	-9.04136e-11	2.95746e-06
4.605	8.95094e-09	3.085e-06
4.60667	6.02275e-08	3.204e-06
4.60833	1.58228e-07	3.40905e-06
4.61	2.99918e-07	3.72181e-06
4.61167	4.86815e-07	4.10804e-06
4.61333	7.29541e-07	4.54002e-06
4.615	1.02651e-06	5.02213e-06
4.61667	1.3687e-06	5.55165e-06
4.61833	1.75159e-06	6.10454e-06
4.62	2.17818e-06	6.64289e-06
4.62167	2.64549e-06	7.16722e-06
4.62333	3.15199e-06	7.71385e-06
4.625	3.72179e-06	8.30815e-06
4.62667	4.37599e-06	8.91191e-06
4.62833	5.10859e-06	9.4625e-06
4.63	5.88343e-06	9.92539e-06
4.63167	6.68388e-06	1.03014e-05
4.63333	7.51751e-06	1.05772e-05
4.635	8.40989e-06	1.07429e-05
4.63667	9.3837e-06	1.07994e-05
4.63833	1.04494e-05	1.07823e-05
4.64	1.16057e-05	1.06998e-05
4.64167	1.27929e-05	1.05425e-05
4.64333	1.39613e-05	1.02685e-05
4.645	1.51089e-05	9.87843e-06
4.64667	1.62258e-05	9.42564e-06
4.64833	1.731e-05	8.96347e-06
4.65	1.83622e-05	8.47799e-06
4.65167	1.93895e-05	7.98393e-06
4.65333	2.04017e-05	7.50271e-06
4.655	2.13922e-05	7.01714e-06
4.65667	2.23572e-05	6.48176e-06
4.65833	2.32932e-05	5.88294e-06
4.66	2.4195e-05	5.25287e-06
4.66167	2.50332e-05	4.64817e-06
4.66333	2.57892e-05	4.13297e-06
4.665	2.64593e-05	3.71094e-06
4.66667	2.70564e-05	3.35098e-06
4.66833	2.75693e-05	3.05335e-06
4.67	2.79824e-05	2.79745e-06
4.67167	2.82873e-05	2.51639e-06
4.67333	2.84867e-05	2.14032e-06
4.675	2.85614e-05	1.7106e-06
4.67667	2.84935e-05	1.36996e-06
4.67833	2.82854e-05	1.18354e-06
4.68	2.79305e-05	1.1773e-06
4.68167	2.74329e-05	1.31712e-06
4.68333	2.68056e-05	1.57647e-06
4.685	2.60768e-05	1.93885e-06
4.68667	2.52609e-05	2.35994e-06
4.68833	2.43757e-05	2.84442e-06
4.69	2.34356e-05	3.37607e-06
4.69167	2.24552e-05	3.93869e-06
4.69333	2.14371e-05	4.51594e-06
4.695	2.03687e-05	5.11632e-06
4.69667	1.92493e-05	5.74106e-06
4.69833	1.81043e-05	6.39854e-06
4.7	1.69707e-05	7.07978e-06
4.70167	1.58691e-05	7.75751e-06
4.70333	1.48187e-05	8.43355e-06
4.705	1.38234e-05	9.06302e-06
4.70667	1.28978e-05	9.61922e-06
4.70833	1.20134e-05	1.01633e-05
4.71	1.1158e-05	1.0766e-05
4.71167	1.034e-05	1.14273e-05
4.71333	9.58376e-06	1.20846e-05
4.715	8.92015e-06	1.26812e-05
4.71667	8.34946e-06	1.32458e-05
4.71833	7.86487e-06	1.37823e-05
4.72	7.4501e-06	1.42732e-05
4.72167	7.0953e-06	1.4694e-05
4.72333	6.79329e-06	1.50838e-05
4.725	6.5432e-06	1.54713e-05
4.72667	6.32577e-06	1.58459e-05
4.72833	6.14924e-06	1.61411e-05
4.73	6.04866e-06	1.62934e-05
4.73167	6.03808e-06	1.62927e-05
4.73333	6.1181e-06	1.61356e-05
4.735	6.25909e-06	1.58826e-05
4.73667	6.44936e-06	1.55583e-05
4.73833	6.67445e-06	1.52055e-05
4.74	6.91531e-06	1.48278e-05
4.74167	7.20091e-06	1.43895e-05
4.74333	7.5603e-06	1.38691e-05
4.745	8.00501e-06	1.32733e-05
4.74667	8.55407e-06	1.26721e-05
4.74833	9.21151e-06	1.21178e-05
4.75	9.95864e-06	1.15785e-05
4.75167	1.07709e-05	1.10183e-05
4.75333	1.16147e-05	1.04226e-05
4.755	1.24638e-05	9.75918e-06
4.75667	1.32934e-05	9.06639e-06
4.75833	1.40987e-05	8.37911e-06
4.76	1.48806e-05	7.75662e-06
4.76167	1.56326e-05	7.20215e-06
4.76333	1.63299e-05	6.70102e-06
4.765	1.6948e-05	6.21403e-06
4.76667	1.74759e-05	5.71583e-06
4.76833	1.79007e-05	5.23452e-06
4.77	1.82087e-05	4.76932e-06
4.77167	1.83947e-05	4.31295e-06
4.77333	1.84626e-05	3.83284e-06
4.775	1.84545e-05	3.37806e-06
4.77667	1.84258e-05	2.99013e-06
4.77833	1.83635e-05	2.66579e-06
4.78	1.82465e-05	2.35551e-06
4.78167	1.80466e-05	2.04862e-06
4.78333	1.77746e-05	1.73834e-06
4.785	1.74686e-05	1.45985e-06
4.78667	1.71558e-05	1.24821e-06
4.78833	1.68322e-05	1.10016e-06
4.79	1.64709e-05	9.8732e-07
4.79167	1.60555e-05	8.35726e-07
4.79333	1.5594e-05	6.48785e-07
4.795	1.50896e-05	4.79592e-07
4.79667	1.45502e-05	3.59648e-07
4.79833	1.39776e-05	3.06849e-07
4.8	1.33735e-05	2.61001e-07
4.80167	1.27549e-05	2.04505e-07
4.80333	1.21175e-05	1.58657e-07
4.805	1.14556e-05	1.27007e-07
4.80667	1.07409e-05	1.0926e-07
4.80833	9.99647e-06	8.11596e-08
4.81	9.26685e-06	4.93619e-08
4.81167	8.56719e-06	1.41625e-08
4.81333	7.91086e-06	-3.54951e-11
4.815	7.29946e-06	3.51402e-09
4.81667	6.72081e-06	2.46632e-08
4.81833	6.15528e-06	6.35599e-08
4.82	5.59992e-06	1.41058e-07
4.82167	5.0696e-06	2.36303e-07
4.82333	4.56139e-06	3.033e-07
4.825	4.07669e-06	3.73846e-07
4.82667	3.62754e-06	5.00741e-07
4.82833	3.22751e-06	6.94633e-07
4.83	2.86446e-06	8.99174e-07
4.83167	2.51574e-06	1.06837e-06
4.83333	2.17522e-06	1.23416e-06
4.835	1.84603e-06	1.4458e-06
4.83667	1.55065e-06	1.71719e-06
4.83833	1.29504e-06	1.99228e-06
4.84	1.08971e-06	2.20037e-06
4.84167	9.1938e-07	2.33015e-06
4.84333	7.82242e-07	2.44179e-06
4.845	6.64641e-07	2.61839e-06
4.84667	5.5311e-07	2.833e-06
4.84833	4.43033e-07	3.01343e-06
4.85	3.29984e-07	3.12224e-06
4.85167	2.29012e-07	3.18943e-06
4.85333	1.46059e-07	3.25875e-06
4.855	8.73218e-08	3.34972e-06
4.85667	4.50867e-08	3.45297e-06
4.85833	1.18929e-08	3.57398e-06
4.86	-1.2013e-10	3.69659e-06
4.86167	1.34103e-08	3.81191e-06
4.86333	5.10932e-08	3.88265e-06
4.865	9.63632e-08	3.87862e-06
4.86667	1.37018e-07	3.80511e-06
4.86833	1.86777e-07	3.71653e-06
4.87	2.77254e-07	3.68489e-06
4.87167	4.18944e-07	3.70158e-06
4.87333	5.89275e-07	3.73967e-06
4.875	7.57988e-07	3.73777e-06
4.87667	9.06797e-07	3.70019e-06
4.87833	1.04393e-06	3.64758e-06
4.88	1.18059e-06	3.60105e-06
4.88167	1.35068e-06	3.54592e-06
4.88333	1.58202e-06	3.4326e-06
4.885	1.87828e-06	3.25349e-06
4.88667	2.21148e-06	3.06491e-06
4.88833	2.52806e-06	2.90525e-06
4.89	2.81968e-06	2.77064e-06
4.89167	3.07499e-06	2.62892e-06
4.89333	3.31263e-06	2.47282e-06
4.895	3.53951e-06	2.32653e-06
4.89667	3.76367e-06	2.19697e-06
4.89833	3.99649e-06	2.0906e-06
4.9	4.24159e-06	1.96847e-06
4.90167	4.48001e-06	1.84075e-06
4.90333	4.67642e-06	1.70724e-06
4.905	4.79965e-06	1.56377e-06
4.90667	4.87166e-06	1.46677e-06
4.90833	4.92602e-06	1.41027e-06
4.91	4.99239e-06	1.34682e-06
4.91167	5.06313e-06	1.23043e-06
4.91333	5.12589e-06	1.07528e-06
4.915	5.18218e-06	9.37741e-07
4.91667	5.20765e-06	8.35544e-07
4.91833	5.20071e-06	7.89697e-07
4.92	5.17627e-06	7.54497e-07
4.92167	5.14767e-06	6.66351e-07
4.92333	5.11792e-06	5.11208e-07
4.925	5.08222e-06	3.31366e-07
4.92667	5.02994e-06	1.86723e-07
4.92833	4.95949e-06	8.80767e-08
4.93	4.86908e-06	3.15803e-08
4.93167	4.75864e-06	-6.95112e-11
4.93333	4.6431e-06	6.88161e-09
4.935	4.52078e-06	5.98285e-08
4.93667	4.38853e-06	1.47975e-07
4.93833	4.22819e-06	2.25472e-07
4.94	4.02439e-06	2.78419e-07
4.94167	3.78355e-06	3.56065e-07
4.94333	3.54328e-06	4.6536e-07
4.945	3.335e-06	5.67556e-07
4.94667	3.16639e-06	5.99354e-07
4.94833	3.00254e-06	6.02904e-07
4.95	2.82547e-06	6.31004e-07
4.95167	2.63959e-06	7.051e-07
4.95333	2.46751e-06	8.07296e-07
4.955	2.30302e-06	9.34339e-07
4.95667	2.12504e-06	1.06123e-06
4.95833	1.93205e-06	1.15293e-06
4.96	1.74361e-06	1.23398e-06
4.96167	1.5852e-06	1.31162e-06
4.96333	1.44925e-06	1.39977e-06
4.965	1.3237e-06	1.49146e-06
4.96667	1.1889e-06	1.62191e-06
4.96833	1.0599e-06	1.78415e-06
4.97	9.44063e-07	1.95334e-06
4.97167	8.50494e-07	2.09784e-06
4.97333	7.6707e-07	2.21068e-06
4.975	6.73622e-07	2.32453e-06
4.97667	5.68097e-07	2.46189e-06
4.97833	4.58083e-07	2.6482e-06
4.98	3.7513e-07	2.8456e-06
4.98167	3.28406e-07	3.00871e-06
4.98333	3.05834e-07	3.12096e-06
4.985	2.95276e-07	3.19344e-06
4.98667	2.81682e-07	3.25517e-06
4.98833	2.72641e-07	3.31737e-06
4.99	2.63599e-07	3.37401e-06
4.99167	2.3951e-07	3.42211e-06
4.99333	1.79192e-07	3.45534e-06
4.995	9.02327e-08	3.46748e-06
4.99667	1.79019e-08	3.47688e-06
4.99833	-1.80827e-10	3.49849e-06
5	3.7502e-08	3.54696e-06
5.00167	9.92741e-08	3.57377e-06
5.00333	1.47516e-07	3.54094e-06
5.005	1.65598e-07	3.4773e-06
5.00667	1.52068e-07	3.44719e-06
5.00833	1.24943e-07	3.43626e-06
5.01	1.0079e-07	3.40936e-06
5.01167	8.57393e-08	3.37135e-06
5.01333	8.42184e-08	3.34115e-06
5.015	9.92618e-08	3.30601e-06
5.01667	1.36939e-07	3.23191e-06
5.01833	1.86692e-07	3.13436e-06
5.02	2.45485e-07	3.03936e-06
5.02167	2.93718e-07	2.95517e-06
5.02333	3.25385e-07	2.87617e-06
5.025	3.49464e-07	2.80012e-06
5.02667	3.7506e-07	2.70347e-06
5.02833	4.11276e-07	2.60544e-06
5.03	4.53435e-07	2.54254e-06
5.03167	5.19745e-07	2.49124e-06
5.03333	6.07172e-07	2.42475e-06
5.035	7.09645e-07	2.29497e-06
5.03667	8.13635e-07	2.11743e-06
5.03833	9.14653e-07	1.92154e-06
5.04	1.0096e-06	1.7827e-06
5.04167	1.09926e-06	1.73499e-06
5.04333	1.20452e-06	1.73421e-06
5.045	1.35027e-06	1.71359e-06
5.04667	1.54784e-06	1.65572e-06
5.04833	1.76937e-06	1.60296e-06
5.05	1.98093e-06	1.57341e-06
5.05167	2.14568e-06	1.54243e-06
5.05333	2.29304e-06	1.48906e-06
5.055	2.46596e-06	1.40997e-06
5.05667	2.68932e-06	1.32665e-06
5.05833	2.95491e-06	1.22851e-06
5.06	3.23336e-06	1.12656e-06
5.06167	3.52393e-06	1.05248e-06
5.06333	3.83341e-06	1.03845e-06
5.065	4.17466e-06	1.07755e-06
5.06667	4.54092e-06	1.1487e-06
5.06833	4.91029e-06	1.1959e-06
5.07	5.27615e-06	1.19451e-06
5.07167	5.66032e-06	1.12727e-06
5.07333	6.07865e-06	1.04349e-06
5.075	6.50756e-06	9.95904e-07
5.07667	6.91826e-06	1.00475e-06
5.07833	7.29547e-06	1.0698e-06
5.08	7.64178e-06	1.15549e-06
5.08167	7.94943e-06	1.22241e-06
5.08333	8.21651e-06	1.28437e-06
5.085	8.45936e-06	1.38006e-06
5.08667	8.70028e-06	1.5017e-06
5.08833	8.94341e-06	1.58903e-06
5.09	9.17344e-06	1.59257e-06
5.09167	9.37648e-06	1.55395e-06
5.09333	9.53867e-06	1.49766e-06
5.095	9.65061e-06	1.46206e-06
5.09667	9.6879e-06	1.44679e-06
5.09833	9.6532e-06	1.46212e-06
5.1	9.56434e-06	1.51463e-06
5.10167	9.44213e-06	1.56875e-06
5.10333	9.28924e-06	1.63462e-06
5.105	9.0963e-06	1.712e-06
5.10667	8.85398e-06	1.82507e-06
5.10833	8.57772e-06	1.95406e-06
5.11	8.29036e-06	2.07926e-06
5.11167	8.00156e-06	2.17234e-06
5.11333	7.70155e-06	2.22936e-06
5.115	7.37589e-06	2.29254e-06
5.11667	7.02545e-06	2.36162e-06
5.11833	6.65531e-06	2.45029e-06
5.12	6.28595e-06	2.57618e-06
5.12167	5.92555e-06	2.78138e-06
5.12333	5.58687e-06	3.07599e-06
5.125	5.25109e-06	3.37532e-06
5.12667	4.90385e-06	3.60844e-06
5.12833	4.53986e-06	3.78606e-06
5.13	4.16126e-06	3.9674e-06
5.13167	3.78996e-06	4.21966e-06
5.13333	3.42069e-06	4.54231e-06
5.135	3.06917e-06	4.9141e-06
5.13667	2.74364e-06	5.28525e-06
5.13833	2.44492e-06	5.62049e-06
5.14	2.1616e-06	5.94765e-06
5.14167	1.87518e-06	6.24364e-06
5.14333	1.58877e-06	6.5305e-06
5.145	1.31595e-06	6.80186e-06
5.14667	1.06721e-06	7.05137e-06
5.14833	8.48641e-07	7.2413e-06
5.15	6.60164e-07	7.36854e-06
5.15167	5.1095e-07	7.51533e-06
5.15333	3.93349e-07	7.73845e-06
5.155	2.92377e-07	8.06008e-06
5.15667	2.019e-07	8.42091e-06
5.15833	1.32604e-07	8.77228e-06
5.16	8.58796e-08	9.09747e-06
5.16167	4.81968e-08	9.41497e-06
5.16333	2.40443e-08	9.74637e-06
5.165	4.44417e-09	1.00856e-05
5.16667	-4.48907e-11	1.04087e-05
5.16833	8.99647e-09	1.06952e-05
5.17	3.7638e-08	1.09388e-05
5.17167	8.43622e-08	1.11934e-05
5.17333	1.49169e-07	1.15087e-05
5.175	2.23017e-07	1.18387e-05
5.17667	2.99901e-07	1.2097e-05
5.17833	3.81336e-07	1.22806e-05
5.18	4.83826e-07	1.24361e-05
5.18167	6.11922e-07	1.26066e-05
5.18333	7.64171e-07	1.27717e-05
5.185	9.2249e-07	1.29002e-05
5.18667	1.08226e-06	1.29612e-05
5.18833	1.24507e-06	1.2952e-05
5.19	1.41237e-06	1.28695e-05
5.19167	1.58725e-06	1.27287e-05
5.19333	1.76966e-06	1.25691e-05
5.195	1.97919e-06	1.24266e-05
5.19667	2.2204e-06	1.22985e-05
5.19833	2.46306e-06	1.21535e-05
5.2	2.68467e-06	1.19857e-05
5.20167	2.87157e-06	1.17919e-05
5.20333	3.04493e-06	1.15766e-05
5.205	3.22133e-06	1.1319e-05
5.20667	3.39615e-06	1.09956e-05
5.20833	3.55613e-06	1.0585e-05
5.21	3.68063e-06	1.00887e-05
5.21167	3.77841e-06	9.54811e-06
5.21333	3.85839e-06	9.02238e-06
5.215	3.92769e-06	8.52497e-06
5.21667	3.98017e-06	8.06169e-06
5.21833	4.01102e-06	7.63555e-06
5.22	4.01699e-06	7.242e-06
5.22167	4.00231e-06	6.88745e-06
5.22333	3.97133e-06	6.52845e-06
5.225	3.93282e-06	6.15028e-06
5.22667	3.8895e-06	5.72027e-06
5.22833	3.8397e-06	5.24825e-06
5.23	3.78159e-06	4.79326e-06
5.23167	3.71647e-06	4.40016e-06
5.23333	3.66071e-06	4.06825e-06
5.235	3.61404e-06	3.76845e-06
5.23667	3.57463e-06	3.46826e-06
5.23833	3.52727e-06	3.17039e-06
5.24	3.46564e-06	2.87015e-06
5.24167	3.40462e-06	2.57051e-06
5.24333	3.36262e-06	2.28138e-06
5.245	3.34833e-06	2.03809e-06
5.24667	3.36301e-06	1.83e-06
5.24833	3.39889e-06	1.58671e-06
5.25	3.44365e-06	1.29047e-06
5.25167	3.48194e-06	1.01553e-06
5.25333	3.49845e-06	8.5684e-07
5.255	3.50186e-06	7.68694e-07
5.25667	3.50862e-06	6.59398e-07
5.25833	3.52435e-06	5.28806e-07
5.26	3.54136e-06	3.84311e-07
5.26167	3.54428e-06	2.75016e-07
5.26333	3.53129e-06	1.79771e-07
5.265	3.50524e-06	9.87237e-08
5.26667	3.46423e-06	5.28759e-08
5.26833	3.40209e-06	4.93264e-08
5.27	3.30788e-06	7.4025e-08
5.27167	3.16637e-06	7.04755e-08
5.27333	2.99375e-06	3.17267e-08
5.275	2.81286e-06	7.02803e-09
5.27667	2.64708e-06	-7.09902e-11
5.27833	2.48427e-06	1.39792e-08
5.28	2.32899e-06	5.9827e-08
5.28167	2.18578e-06	1.69122e-07
5.28333	2.04106e-06	3.34914e-07
5.285	1.88583e-06	5.46554e-07
5.28667	1.71095e-06	7.68694e-07
5.28833	1.53006e-06	9.66135e-07
5.29	1.34917e-06	1.14953e-06
5.29167	1.18036e-06	1.34342e-06
5.29333	1.03715e-06	1.56201e-06
5.295	9.19548e-07	1.74185e-06
5.29667	8.14023e-07	1.8618e-06
5.29833	6.99457e-07	1.95689e-06
5.3	5.7585e-07	2.05924e-06
5.30167	4.58249e-07	2.17208e-06
5.30333	3.57277e-07	2.26378e-06
5.305	2.78876e-07	2.35887e-06
5.30667	2.00475e-07	2.49287e-06
5.30833	1.22138e-07	2.6313e-06
5.31	4.37374e-08	2.72991e-06
5.31167	-1.51743e-11	2.7758e-06
5.31333	1.50226e-09	2.78813e-06
5.315	2.26198e-08	2.87025e-06
5.31667	2.71721e-08	3.06234e-06
5.31833	1.9585e-08	3.31644e-06
5.32	2.26198e-08	3.50648e-06
5.32167	4.6709e-08	3.57075e-06
5.32333	6.9344e-08	3.5419e-06
5.325	7.53505e-08	3.48139e-06
5.32667	7.08615e-08	3.42217e-06
5.32833	7.08615e-08	3.38312e-06
[truncated: 4,302 more rows]

## Sheet: Fig3C
Time (min)	0	24	53	70	85	118	135	145	150	155	160	165	169	177	195	225	255
wt_1	0.0263333	0.0415	0.058	0.066	0.075	0.1075	0.125	0.13	0.136	0.142	0.146	0.148	0.128	0.114	0.074	0.063	0.042
wt_2	0.0263333	0.0435	0.055	0.066	0.076	0.107	0.124	0.132	0.138	0.144	0.146	0.147	0.131	0.115	0.079	0.059	0.043
wt_3	0.0283333	0.041	0.0555	0.0665	0.0775	0.1095	0.123	0.132	0.141	0.148	0.15	0.15	0.131	0.112	0.076	0.062	0.044
never_1	0.0223333	0.0365	0.0495	0.058	0.0655	0.0925	0.107	0.112	0.117	0.125	0.128	0.13	0.111	0.109	0.064	0.055	0.037
never_2	0.0223333	0.036	0.0485	0.0565	0.067	0.093	0.11	0.115	0.117	0.124	0.125	0.127	0.114	0.11	0.069	0.053	0.035
never_3	0.0216667	0.037	0.049	0.059	0.066	0.0955	0.109	0.115	0.12	0.126	0.128	0.128	0.114	0.111	0.068	0.056	0.033
always_1	0.0186667	0.0365	0.048	0.057	0.067	0.094	0.11	0.119	0.121	0.125	0.127	0.128	0.11	0.093	0.054	0.042	0.022
always_2	0.0183333	0.035	0.047	0.058	0.0665	0.094	0.108	0.115	0.121	0.124	0.127	0.128	0.107	0.093	0.055	0.04	0.026
always_3	0.0213333	0.0375	0.049	0.057	0.063	0.0925	0.104	0.112	0.118	0.123	0.124	0.125	0.109	0.092	0.053	0.041	0.025
							+DCS 1mM

## Sheet: Fig3D
Time (minutes)	never_1	never_2	never_3	10min_1	10min_2	10min_3	always_1	always_2	always_3
3	0.0263333	0.0273333	0.0243333	0.0273333	0.0286667	0.0233333	0.018	0.0236667	0.0146667
6	0.026	0.0263333	0.024	0.0273333	0.0283333	0.0236667	0.0193333	0.0233333	0.0146667
9	0.0246667	0.0263333	0.0233333	0.026	0.0283333	0.023	0.019	0.0233333	0.0146667
12	0.0233333	0.025	0.022	0.0256667	0.0283333	0.023	0.0183333	0.0236667	0.015
15	0.0226667	0.025	0.0206667	0.0256667	0.0283333	0.0226667	0.0186667	0.0236667	0.0143333
18	0.022	0.0246667	0.0196667	0.0256667	0.0286667	0.0223333	0.0196667	0.0243333	0.0146667
21	0.0203333	0.024	0.019	0.0253333	0.0286667	0.022	0.0193333	0.0246667	0.0146667
24	0.0203333	0.0236667	0.0193333	0.0256667	0.0286667	0.023	0.02	0.0253333	0.0163333
27	0.0193333	0.023	0.0183333	0.0256667	0.029	0.023	0.0206667	0.026	0.0163333
30	0.019	0.0223333	0.018	0.0253333	0.0293333	0.0236667	0.0213333	0.027	0.0173333
33	0.0183333	0.0226667	0.0176667	0.0263333	0.0303333	0.0243333	0.0223333	0.028	0.018
36	0.0183333	0.0223333	0.0173333	0.027	0.031	0.0253333	0.0233333	0.0296667	0.0196667
39	0.018	0.0216667	0.0173333	0.0276667	0.0323333	0.0263333	0.0243333	0.0313333	0.0206667
42	0.0176667	0.022	0.0173333	0.0296667	0.0343333	0.028	0.026	0.034	0.022
45	0.0176667	0.0213333	0.017	0.031	0.036	0.0293333	0.0273333	0.0356667	0.0233333
48	0.0176667	0.0213333	0.017	0.0326667	0.038	0.03	0.028	0.0376667	0.0243333
51	0.017	0.0216667	0.0166667	0.035	0.04	0.031	0.0283333	0.04	0.025
54	0.017	0.0216667	0.017	0.037	0.0423333	0.0313333	0.029	0.0423333	0.0256667
57	0.017	0.0216667	0.0166667	0.0396667	0.0446667	0.032	0.0296667	0.0433333	0.0266667
60	0.0173333	0.0213333	0.017	0.0423333	0.0473333	0.0323333	0.0306667	0.0453333	0.027
63	0.0176667	0.0216667	0.0166667	0.044	0.05	0.0326667	0.031	0.047	0.0273333
66	0.0176667	0.0223333	0.0176667	0.0466667	0.0513333	0.0336667	0.0316667	0.049	0.0283333
69	0.0176667	0.022	0.0176667	0.048	0.053	0.035	0.0313333	0.0486667	0.0293333
72	0.018	0.023	0.0183333	0.0493333	0.0553333	0.036	0.032	0.0503333	0.03
75	0.019	0.0233333	0.0183333	0.051	0.0566667	0.037	0.032	0.051	0.0303333
78	0.0196667	0.0243333	0.0193333	0.0526667	0.0583333	0.0383333	0.033	0.0523333	0.0313333
81	0.02	0.025	0.02	0.0543333	0.06	0.0396667	0.034	0.0526667	0.0316667
84	0.0206667	0.0256667	0.021	0.055	0.061	0.0413333	0.034	0.0536667	0.0323333
87	0.0216667	0.0266667	0.022	0.0563333	0.0626667	0.042	0.035	0.0546667	0.0326667
90	0.0216667	0.027	0.0226667	0.0566667	0.064	0.044	0.035	0.0553333	0.0326667
93	0.0226667	0.0273333	0.0236667	0.058	0.066	0.0456667	0.036	0.0563333	0.0336667
96	0.0233333	0.0286667	0.0246667	0.0583333	0.067	0.047	0.0363333	0.0573333	0.0343333
99	0.0243333	0.029	0.0253333	0.0596667	0.0683333	0.0483333	0.0376667	0.0583333	0.034
102	0.0253333	0.0303333	0.0263333	0.0606667	0.0693333	0.0496667	0.038	0.06	0.035
105	0.0263333	0.0313333	0.0266667	0.0616667	0.0713333	0.051	0.0386667	0.061	0.0356667
108	0.0273333	0.0323333	0.027	0.0623333	0.0723333	0.0523333	0.0396667	0.0616667	0.036
111	0.029	0.033	0.0283333	0.0623333	0.0746667	0.054	0.0403333	0.0626667	0.037
114	0.03	0.0333333	0.029	0.063	0.076	0.0556667	0.0413333	0.063	0.0376667
117	0.0306667	0.034	0.0293333	0.064	0.077	0.0573333	0.0426667	0.064	0.0383333
120	0.0316667	0.0353333	0.0296667	0.0643333	0.079	0.0586667	0.0433333	0.0646667	0.0393333
123	0.0323333	0.036	0.0306667	0.066	0.0806667	0.0606667	0.0446667	0.0663333	0.0396667
126	0.0333333	0.0363333	0.031	0.067	0.0826667	0.0616667	0.046	0.0673333	0.04
129	0.0343333	0.038	0.0323333	0.0676667	0.084	0.063	0.0473333	0.069	0.0413333
132	0.0343333	0.0383333	0.033	0.0683333	0.0856667	0.065	0.0476667	0.0696667	0.0416667
135	0.0353333	0.039	0.0336667	0.07	0.0873333	0.0663333	0.0493333	0.071	0.0433333
138	0.036	0.039	0.0343333	0.0713333	0.088	0.068	0.05	0.0716667	0.044
141	0.036	0.04	0.0353333	0.0723333	0.0906667	0.0696667	0.0513333	0.0733333	0.0453333
144	0.036	0.0396667	0.036	0.0736667	0.0926667	0.0713333	0.0523333	0.0746667	0.046
147	0.0363333	0.041	0.0363333	0.0743333	0.0943333	0.0713333	0.054	0.0756667	0.0463333
150	0.0366667	0.0413333	0.0373333	0.076	0.0956667	0.0736667	0.055	0.077	0.0476667

## Sheet: Fig3F
PBP1b induction	Movie	Doubling time (min)	Standard error of doubling time (min)
Always	1	84.3448	14.8082
Always	2	81.5704	21.1371
Always	3	95.3272	29.1524
Always	4	89.1609	21.837
Always	5	88.9389	24.1354
Never	1	94.4	44.6493
Never	2	80.0589	17.532
Never	3	77.8379	15.3893
Never	4	83.0886	20.0972
10 min	1	83.1736	10.7758
10 min	2	91.0058	9.42141
10 min	3	95.7135	24.6396
10 min	4	86.199	22.6522
10 min	5	99.1062	54.7403

## Sheet: Fig3G
PBP1b induction	Pad	Number of cells	Number of lysis events	Lysis probability
Always	1	67	3	0.0447761
Always	2	44	1	0.0227273
Always	3	83	4	0.0481928
Always	4	81	5	0.0617284
Always	5	64	3	0.046875
Never	1	75	35	0.466667
Never	2	25	12	0.48
Never	3	73	24	0.328767
Never	4	21	10	0.47619
Never	5	33	23	0.69697
10 min	1	110	10	0.0909091
10 min	2	159	15	0.0943396
10 min	3	143	20	0.13986
10 min	4	89	7	0.0786517
10 min	5	85	17	0.2

## Sheet: Fig3S1_minimal
Flux
D-cyc treatment		D-cyc recovery
Time (min)	Flux (1/μm.s)	Time (min)	Flux (1/μm.s)
0	0.0022	10	0.0004
10	0.00095027	20	0.0015
20	0.000584015	30	0.0019
30	0.000212459	Untreated	0.0022
40	0.000161434
50	6.70016e-05
60	2.3784e-05
Track length (μm)											Velocities (nm/s)
steady state	D-cyc treatment (t1)	D-cyc treatment (t2)	D-cyc treatment (t3)	D-cyc treatment (t4)	D-cyc treatment (t5)	D-cyc treatment (t6)	D-cyc recovery (t1)	D-cyc recovery (t2)	D-cyc recovery (t3)		steady state	D-cyc treatment (t1)	D-cyc treatment (t2)	D-cyc treatment (t3)	D-cyc treatment (t4)	D-cyc treatment (t5)	D-cyc treatment (t6)	D-cyc recovery (t1)	D-cyc recovery (t2)	D-cyc recovery (t3)
0.0796454	0.0158797	0.116144	0.0748314	0.0178462	0.0263906	0.0297937	0.0147508	0.208836	0.266377		5.98975	1.65437	5.3192	7.25327	8.92309	13.1953	2.86437	23.1122	3.99203	3.05478
0.0847788	0.152286	0.0658163	0.0650674	0.0312199	0.0517802	0.00803182	0.136534	0.387749	0.277385		2.86054	2.9545	7.7285	6.5959	5.76447	14.3927	3.62102	8.69518	5.74324	2.70942
0.303954	0.0114362	0.264324	0.205852	0.0397341	0.124605	0.277438	0.0358118	0.02846	0.294274		1.13995	6.54188	8.99372	4.94125	10.1969	7.99317	6.92456	12.8872	4.58191	2.90093
0.165877	0.395179	0.172585	0.0212174	0.0106649	0.103318	0.0446902	0.0527487	0.275046	0.0545997		4.26502	2.34374	11.0505	4.871	1.28149	2.68191	5.0141	18.228	5.02305	3.82909
0.023794	0.00731891	0.0182706	0.0610134	0.0249944	0.0224446	0.0326262	0.00624932	0.0812381	0.0443986		7.83125	2.24722	13.8188	5.16137	2.69428	8.33031	2.20649	6.66848	6.47898	4.10889
0.205963	0.0587454	0.0578822	0.0328683	0.0225454	0.0438574	0.0471686	0.0757701	0.00918991	0.0703005		7.06384	1.60233	11.9162	7.50088	5.53622	6.05758	4.01591	2.33396	6.05391	3.13042
0.0144745	0.0561201	0.0696182	0.154995	0.093523	0.0330105	0.0203804	0.0473663	0.0470513	0.0217453		8.6839	1.87785	7.25152	6.91916	10.1918	3.8592	12.5286	2.36829	2.79117	1.95249
0.179161	0.0366245	0.017965	0.0150969	0.149623	0.0299989	0.0265527	0.0215241	0.285045	0.0649515		11.5082	0.897893	4.02689	3.71607	8.78788	2.00666	4.57674	4.93967	1.44273	1.24849
0.0258711	0.0634635	0.0176425	0.0149484	0.043764	0.0691074	0.041992	0.0222002	0.0555345	0.00724332		9.60426	0.739027	4.14254	2.39114	5.59394	3.07858	2.7744	6.51411	4.31105	2.76163
0.113071	0.0921276	0.0229882	0.0710881	0.0173365	0.0913793	0.0246857	0.0880599	0.175072	0.00808948		5.06831	2.17262	4.3969	3.89624	2.96755	6.46881	4.51164	3.85341	10.8943	4.74104
0.0525244	0.0184101	0.0980404	0.0494698	0.0235164	0.00702366	0.0295513	0.0141807	0.433965	0.0167813		1.93065	3.75038	3.16435	2.99062	0.888555	5.51631	6.66185	1.24054	14.1228	4.65156
0.0585007	0.0214319	0.163029	0.0638263	0.0175401	0.0355947	0.054022	0.0467858	0.2332	0.0168916		6.4604	4.70534	2.70601	0.942512	0.458395	5.11538	7.35558	3.25027	10.8764	4.16812
0.102508	0.0061981	0.110612	0.0660013	0.010897	0.0382894	0.0173873	0.0741496	0.145793	0.151146		14.4507	4.56784	6.11032	1.84006	2.14495	4.18233	5.79823	6.44493	4.39842	3.54356
0.00823337	0.0411993	0.204691	0.0674533	0.0442515	0.0115798	0.046124	0.0854628	0.111262	0.087136		15.0634	2.74187	6.2743	1.40908	9.9045	0.452239	4.60691	3.34613	7.30753	3.67587
0.0311941	0.0788584	0.234344	0.0584492	0.0321842	0.0300593	0.10012	0.0124227	0.133025	0.27264		10.7744	1.18881	2.03294	1.78533	1.15058	3.86418	4.57302	5.43322	8.79373	3.88442
0.0926432	0.0196799	0.030595	0.0164012	0.115582	0.0351463	0.0316617	0.0332863	0.12642	0.0298261		11.5581	1.3737	3.54637	4.94061	1.57497	5.82746	3.05929	9.70745	11.4016	2.5282
0.0246081	0.0141683	0.0878129	0.00902921	0.0168173	0.00762202	0.0226056	0.0894675	0.190469	0.161265		5.74148	3.87883	4.77592	7.19285	3.60333	5.39213	2.45388	10.7657	17.9289	1.24534
0.0166191	0.0082702	0.0131294	0.16528	0.0220229	0.00817523	0.0240197	0.0186488	0.0147164	0.0140701		5.7598	2.65014	2.75918	4.15477	11.2727	3.81571	5.4287	9.76934	4.4969	3.36886
0.196631	0.0176045	0.0914867	0.0191068	0.014833	0.075184	0.00482327	0.208021	0.233177	0.041618		5.54715	3.77785	1.02082	1.89475	11.5815	3.90541	9.1353	7.17033	4.74682	2.94653
0.0547871	0.134211	0.0628888	0.0107514	0.104549	0.0371666	0.038706	0.0425837	0.164538	0.0974601		8.75715	3.56654	1.86365	4.45043	9.56254	5.07667	11.4255	4.10106	2.63729	1.41909
0.0242586	0.0919881	0.132566	0.0116169	0.0243352	0.0514904	0.0543687	0.0437103	0.0400265	0.0335201		12.155	1.33945	2.98506	6.07278	4.09405	4.4624	10.2835	10.5577	0.710492	0.647356
0.0124221	0.00853922	0.0313556	0.0212831	0.022496	0.0258602	0.0425282	0.0423184	0.106857	0.162562		9.96363	1.91572	1.73854	4.6079	1.27729	2.80167	7.28169	5.12687	0.786877	1.24329
0.0757715	0.00369513	0.0979122	0.119893	0.0158012	0.0356455	0.0174926	0.0402905	0.00931616	0.124988		2.38249	0.820202	0.520888	6.38443	3.69372	1.36153	5.15888	8.11695	0.829477	1.81644
0.270963	0.00651577	0.0293686	0.0141262	0.0376891	0.0296608	0.00978671	0.0152168	0.0878181	0.00970047		5.46314	3.10413	1.53326	9.36598	5.72892	4.95814	4.43919	5.67575	0.254365	2.11575
0.00915183	0.0367504	0.0253858	0.101336	0.0148072	0.0366874	0.0210066	0.0125224	0.114204	0.523002		16.1935	4.66007	1.83154	5.96289	10.0237	6.97891	3.69184	2.11247	3.81127	1.55174
0.0734056	0.00643884	0.0433959	0.0268948	0.157676	0.0123954	0.0346493	0.0729578	0.02779	0.0399688		17.1528	2.65104	5.64083	1.1436	10.7249	4.67158	2.41763	26.3744	6.66351	1.49831
0.106979	0.01196	0.0550759	0.0199653	0.0222418	0.0609939	0.0345332	0.069799	0.0777143	0.0548703		14.0605	0.89586	10.8997	1.43571	5.97243	1.51645	2.92249	3.12466	5.90405	2.62942
0.123207	0.0162451	0.0293655	0.0358707	0.018188	0.0340419	0.00881699	0.103498	0.0244751	0.24748		10.3586	1.20735	12.1262	1.92731	7.8243	5.15216	6.22727	7.69833	4.21119	3.66105
0.120798	0.0788158	0.0178748	0.0814352	0.0290939	0.0330073	0.0766688	0.054738	0.0062081	0.0692515		11.4845	2.56046	3.94969	7.5756	4.00747	5.72791	7.35702	9.26278	4.81022	5.11471
0.30115	0.0796273	0.0127055	0.0860284	0.0247432	0.00310309	0.0294097	0.021597	0.00910576	0.436657		14.9033	4.85897	2.65123	10.8898	4.51349	2.38637	7.22188	7.9037	6.80355	7.14246
0.0308731	0.0238657	0.0465369	0.031469	0.0294383	0.00352993	0.0142529	0.178112	0.39528	0.0531718		15.3203	4.58033	2.78214	11.3794	4.07789	11.0128	7.0012	6.3295	7.20959	7.83488
0.0661359	0.0355161	0.0174023	0.0333948	0.0311229	0.0555009	0.0156819	0.0675811	0.0385944	0.0473453		13.915	2.8558	4.9731	10.6769	5.13562	20.9425	6.2055	7.8501	6.4472	6.19804
0.0809421	0.0241583	0.0031163	0.0220783	0.0282118	0.0211975	0.0393994	0.214418	0.198646	0.0945124		11.878	1.60761	6.01101	7.44447	6.89049	22.436	6.02304	5.28466	6.84247	4.64374
0.174039	0.093063	0.197313	0.116729	0.149585	0.0229833	0.012001	0.0248721	0.07155	0.259838		10.0218	2.91381	4.36304	3.61415	4.61062	14.2053	6.3809	5.47645	8.89295	3.07212
0.00738603	0.0561765	0.0767008	0.0792916	0.10007	0.0157296	0.0302199	0.485741	0.169212	0.212574		11.0624	4.51301	3.19017	2.48827	2.61418	2.73309	6.62262	8.36369	9.68381	3.14083
0.0223358	0.0890658	0.0499488	0.0639481	0.00935976	0.0276628	0.101688	0.0488261	0.0906279	0.0269903		14.1202	3.27441	6.31277	1.92467	7.62184	4.0765	4.76147	10.9722	7.12711	4.90444
0.140427	0.0659601	0.0100823	0.00699825	0.00959781	0.0824339	0.0344563	0.0069598	0.207343	0.00080691		14.9584	3.1431	6.93605	2.36705	9.92809	7.28162	3.6042	10.762	2.71093	5.9223
0.129581	0.0382561	0.068778	0.0676033	0.0233222	0.00263792	0.133027	0.251043	0.0344978	0.0116061		12.3934	4.79562	6.42476	5.50912	10.3207	9.8499	2.35261	11.1001	1.25394	4.48801
0.137208	0.0505522	0.0607255	0.055504	0.0385981	0.039936	0.14912	0.00951526	0.0558262	0.113788		4.30927	8.61913	4.92624	2.52105	10.6134	6.83949	3.66811	2.23743	3.41106	2.45806
0.0371652	0.0592173	0.0559133	0.107463	0.169643	0.0606671	0.0593103	0.0749241	0.213639	0.150416		8.68274	10.5602	3.01733	5.9821	7.16334	1.0309	2.05032	3.60868	2.83296	1.47761
0.0448312	0.109394	0.103607	0.164098	0.0114226	0.0266853	0.0716334	0.016243	0.0302741	0.0247427		6.24209	8.19011	2.92325	13.2345	0.339422	1.75045	9.31173	6.2372	0.422232	1.8979
0.0768285	0.0611391	0.107545	0.0282212	0.00551313	0.00855015	0.0282214	0.0685587	0.039698	0.232559		1.4157	4.34873	1.90078	10.8014	5.91929	0.771763	12.9227	7.00488	3.13986	1.9124
0.066885	0.0613911	0.034154	0.168933	0.0133528	0.0203996	0.192656	0.0522529	0.0806808	0.0330046		3.29067	4.96699	3.00422	2.34914	8.68331	1.47168	9.52853	4.9789	4.5145	2.51608
0.0377543	0.0323498	0.0312613	0.0105784	0.0297912	0.0448742	0.0763215	0.108892	0.0808571	0.0613897		10.8506	4.04617	4.53932	1.51899	6.34113	0.430461	6.79726	5.56398	6.57768	3.0349
0.0825846	0.0409236	0.0465912	0.122974	0.0582065	0.0188992	0.0174832	0.0674301	0.0646336	0.0279519		18.1604	1.24281	4.91522	3.50063	1.0026	3.35272	11.8019	4.56432	8.10154	3.75419
0.0409306	0.0683898	0.027533	0.0150194	0.065725	0.00602154	0.0419384	0.0512447	0.025919	0.0249633		19.251	2.07969	5.01568	5.07057	5.31049	4.88117	7.65357	7.3277	6.30402	4.88198
0.0563112	0.353433	0.00246356	0.115566	0.219348	0.0125324	0.0214594	0.100207	0.063824	0.306982		12.5556	4.29316	4.95623	4.77593	5.1769	5.42317	6.06982	7.22323	3.98104	3.61458
0.0689272	0.00774834	0.00752324	0.0702533	0.0561357	0.00443606	0.00525903	0.0121334	0.0824318	0.273562		11.897	2.34102	4.54164	3.25257	1.92905	5.06251	5.01447	1.55798	4.27251	0.597524
0.0457952	0.0444788	0.00273009	0.0299638	0.0347166	0.0151514	0.0115742	0.0643247	0.0268372	0.0852288		2.80984	6.59613	2.76898	0.895165	6.34215	3.76836	3.41093	2.70674	5.90926	2.83436
0.0789513	0.0298028	0.00161362	0.0666401	0.0290572	0.0605096	0.00719207	0.00701062	0.0250103	0.0664299		6.81067	6.44478	0.580382	2.5959	7.52804	2.25481	2.04117	3.9066	6.28731	5.42683
0.0877899	0.0529618	0	0.0733943	0.0845314	0.0217175	0.0453225	0.0118022	0.014187	0.147863		11.1576	4.64666	3.16902	1.76791	5.21869	1.74783	5.06699	5.51546	4.69674	6.36034
0.409486	0.0179303	0.00299662	0.0140738	0.0721691	0.0267274	0.0415246	0.021518	0.064139	0.0629147		5.29464	3.34946	1.93886	1.969	5.67458	1.89187	9.95603	5.27072	2.6093	4.92818
0.195351	0.0391703	0	0.0158334	0.00687929	0.0740749	0.0302025	0.0176154	0.0974366	0.178067		9.71268	1.88301	2.65576	1.35113	9.78773	0.47462	10.1902	2.51189	1.81401	4.23144
0.0394628	0.134728	0.00175013	0.0111657	0.0279396	0.0480099	0.0895294	0.10828	0.496571	0.0417185		15.2061	3.39767	3.27143	1.18028	11.3026	2.82297	6.37516	4.80976	2.56884	5.78882
0.311309	0.00973994	0	0.0371052	0.183252	0.013952	0.0644714	0.0637159	0.232645	0.159451		19.0267	3.32732	2.78672	1.68966	9.6507	1.60947	0.934911	6.16609	2.70838	2.06462
0.0153065	0.136288	0.00505745	0.0178205	0.00564106	0.110578	0.0300353	0.0204887	0.344671	0.0597924		23.2399	3.24837	1.17224	2.04094	7.89088	0.520223	0.91229	2.70656	1.52078	3.02082
0.104855	0.0263567	0	0.0253002	0.0319299	0.0457194	0.0122702	0.365455	0.109031	0.0608268		22.7919	3.74734	1.93989	4.02783	6.08374	2.11289	3.20646	1.66789	1.53927	5.6288
0.0160129	0.0447631	0.00663415	0.0962594	0.0279684	0.0121306	0.0234961	0.020412	0.0101683	0.0753334		19.3404	5.71809	1.11796	9.67523	5.16986	4.40154	5.52252	2.21572	4.10416	7.22502
0.0428904	0.130112	0	0.0831768	0.0104992	0.101895	0.0213968	0.115712	0.0226709	0.115875		5.64651	7.56987	2.14549	11.74	5.32428	4.7132	9.90433	1.5979	5.55296	6.25589
0.0410111	0.145156	0	0.128621	0.015722	0.0903791	0.0171757	0.0842112	0.302517	0.0873737		1.2072	5.1233	3.92575	6.88634	7.08522	3.43848	9.04102	1.55529	2.8678	4.21416
0.0709506	0.0519561	0.00284567	0.00939087	0.0149111	0.079886	0.0509678	0.108141	0.0509514	0.033202		2.15963	3.34735	5.15043	2.22366	7.72345	2.74895	3.8247	7.09036	2.44593	2.31566
0.12253	0.0419039	0.00302245	0.0490779	0.00780859	0.113395	0.0385207	0.0653685	0.0373315	0.0382554		2.84894	3.66053	4.55058	3.51372	6.3621	2.56167	4.41797	8.36874	4.26431	2.53924
0.0398346	0.204602	0.0180804	0.0320315	0.0344806	0.0173355	0.0529052	0.142141	0.155706	0.00491046		2.23346	3.56532	13.5526	1.68087	3.81812	0.646527	2.19635	6.72783	4.4881	4.13673
0.0683942	0.262173	0.0323277	0.03328	0.0414574	0.0951152	0.0539911	0.0592702	0.0272118	0.173683		1.2478	2.83248	10.0624	6.39815	1.24577	2.14582	0.793477	6.49192	0.961181	3.60376
0.042368	0.132625	0.206276	0.0349216	0.0707137	0.0191835	0.0415851	0.0437336	0.0966161	0.0428813		2.3108	2.40816	5.18957	6.01665	5.50409	2.68209	12.3429	3.52376	6.24012	3.05873
0.083753	0.0981116	0.00193567	0.00548476	0.0645904	0.0393511	0.0391897	0.0190148	0.0291165	0.0151598		5.29255	4.01555	3.0089	4.29025	11.7228	2.15678	14.7756	9.87192	14.3377	2.9017
0.0204544	0.0509909	0.0496409	0.0428891	0.0238465	0.0536301	0.163365	0.0461069	0.00433511	0.0108456		12.4559	4.41391	2.73952	2.9952	13.665	7.18558	6.73303	12.3229	18.8505	2.77435
0.0594561	0.0797247	0.385213	0.0149283	0.0120602	0.0343147	0.174458	0.0290292	0.0733001	0.101243		18.7362	3.05502	3.27511	4.61167	12.7788	9.02469	6.10166	9.94574	13.5344	3.47825
0.151454	0.0620533	0.0296464	0.0523486	0.0415496	0.0517167	0.0849471	0.0617355	0.140116	0.279749		20.7964	2.20551	6.14814	2.85144	9.97787	7.3005	2.83967	5.18302	4.76796	3.37174
0.155837	0.0510157	0.0190883	0.0219669	0.0702544	0.127909	0.00253305	0.180158	0.185739	0.0200897		18.0641	2.47268	5.6033	6.34775	7.44229	1.5744	1.63623	11.5474	7.90667	1.59797
0.0853647	0.0275275	0.103408	0.234346	0.00709105	0.0623317	0.0866556	0.044385	0.18496	0.0498955		13.3825	2.65355	1.69074	16.3549	3.36903	2.4731	7.49317	7.3611	5.06762	3.22125
0.0545832	0.0247293	0.0125022	0.0791885	0.00918277	0.0136107	0.0572129	0.169638	0.096606	0.0814973		6.14016	4.72335	3.71198	16.5856	4.7818	1.8627	13.2868	4.42432	1.67462	2.58295
0.0757435	0.104318	0.0570708	0.00569753	0.0182296	0.0816402	0.0136279	0.0517351	0.0595373	0.0157394		4.93865	6.49549	7.80533	6.12616	6.31008	3.19592	12.4848	10.9098	11.729	0.893813
0.0634359	0.0693173	0.00510015	0.0263806	0.0132001	0.0354772	0.0160796	0.00778151	0.0297412	0.0778119		12.9356	5.80312	10.0349	4.33154	5.75332	2.64735	4.32916	12.1044	8.49863	2.04116
0.14143	0.0286243	0.0873919	0.00575352	0.0599168	0.0518923	0.0783974	0.0843685	0.23544	0.478663		3.84039	5.86926	8.18391	7.95671	7.72387	2.13093	5.11084	7.3193	2.61916	1.68319
0.0990438	0.00968008	0.0917465	0.052304	0.0184071	0.0334427	0.0210535	0.0178324	0.155965	0.0764081		5.30855	6.31164	4.05276	6.80048	10.5649	3.40793	14.6694	2.19504	3.57577	1.33833
0.0232389	0.139814	0.0227366	0.127909	0.0526115	0.0690208	0.0426339	0.150977	0.0132365	0.0638971		5.20981	5.76147	3.48731	4.22049	8.84127	4.36417	8.46766	4.27699	4.0192	1.20324
0.1197	0.0109273	0.0954553	0.143545	0.00829981	0.0808966	0.0156487	0.045782	0.0864757	0.0204033		2.75017	3.02422	4.78475	2.61826	4.51538	7.33452	5.13016	7.06514	2.5045	0.628004
0.184227	0.0154042	0.0570996	0.0486678	0.0295821	0.0477721	0.0411641	0.0584106	0.217278	0.0454592		2.67046	3.95506	5.88405	3.13784	2.18303	2.54513	5.32857	6.21136	0.623606	1.31693
0.0835409	0.0515162	0.00984683	0.0221441	0.0619048	0.0187567	0.0170974	0.15269	0.222268	0.300287		3.92906	5.88382	5.79155	5.31846	2.06653	5.39007	6.32646	7.46331	1.42167	2.09257
0.0578715	0.0893852	0.0653746	0.00780345	0.0742549	0.0483903	0.0259064	0.0353995	0.0815044	0.164157		5.31993	2.76961	3.18397	7.22312	7.59325	5.92266	7.19052	6.82544	4.10559	5.05182
0.187915	0.151345	0.0162394	0.0556601	0.00858637	0.0956767	0.0390059	0.0193133	0.104958	0.207383		5.70622	7.97367	3.00577	5.5017	10.5227	3.82424	4.57083	9.17834	6.29182	6.46383
0.146564	0.052095	0.0533075	0.00746574	0.0359692	0.00610782	0.0144164	0.097072	0.0399058	0.0314673		4.7491	7.6412	2.54036	2.01768	9.65596	2.79557	2.75413	2.14582	5.96149	5.36574
0.0583057	0.0469979	0.0256629	0.146781	0.00303686	0.00618229	0.0226949	0.0369594	0.0359719	0.0127067		1.05551	4.87352	5.21666	6.56841	5.57131	5.70856	5.14215	4.90227	6.01044	5.76829
0.0902841	0.0708	0.0233817	0.0250807	0.0587749	0.0275701	0.0280291	0.0272759	0.0870998	0.148802		4.42452	2.50252	6.80468	6.87268	4.86776	9.39087	8.60052	10.0438	7.9191	8.19334
0.0960399	0.122707	0.114987	0.0265417	0.0238279	0.0880151	0.0399113	0.127476	0.11972	0.0393736		4.30272	3.24954	2.23401	5.48591	9.07655	6.90101	10.1168	13.9178	9.05316	8.01544
0.0787005	0.0425494	0.0339713	0.0294304	0.019339	0.0289926	0.0234803	0.03618	0.0677716	0.0435301		3.03144	2.57936	2.36196	3.9112	12.9901	1.68318	9.69154	13.9032	6.56568	4.80618
0.164844	0.0990007	0.0596085	0.0904252	0.0984872	0.0212187	0.0706792	0.0186413	0.200201	0.107782		9.01008	1.72817	6.87487	7.56405	13.1035	6.3406	5.32073	9.32439	2.26388	3.09173
0.0305697	0.10531	0.0726792	0.0149496	0.0806081	0.0220415	0.0112979	0.0598097	0.00771275	0.0314727		13.6957	3.20372	5.37197	9.19539	8.66827	9.0463	3.65193	7.55863	0.258804	4.28639
0.215557	0.0248931	0.0248682	0.030527	0.0215644	0.0204286	0.0151335	0.0516197	0.161141	0.0659404		6.14729	3.93623	1.98593	6.61192	4.70571	8.62355	9.08955	4.82749	1.48952	5.28116
0.0142979	0.158267	0.0133467	0.218121	0.0612316	0.00486751	0.00845232	0.0147602	0.0393459	0.0530229		8.17424	3.789	5.52571	4.07821	2.28058	1.70554	8.66607	2.86773	5.52517	3.21363
0.0394444	0.0979626	0.0907281	0.128946	0.0134011	0.0209024	0.00412081	0.0185686	0.347898	0.0113596		12.522	4.44528	8.86255	2.8094	5.21207	3.96913	4.74815	4.18361	10.4767	0.416811
0.0382321	0.118568	0.0788912	0.113436	0.0879454	0.0474029	0.0140852	0.0179642	0.0439231	0.0818288		10.0934	3.85862	10.9786	3.42273	4.15836	5.42418	2.04541	8.02572	13.1191	1.39387
0.0520111	0.0215275	0.026919	0.0118954	0.00124261	0.0743981	0.0967958	0.0120934	0.0698021	0.0682687		9.28286	2.83503	7.62783	4.18713	8.77007	2.57442	5.63161	10.9741	10.9988	0.724889
0.130685	0.146175	0.0202656	0.0138227	0.0250249	0.00472848	0.0289959	0.030486	0.0719893	0.0612712		10.7767	6.20943	3.40781	2.69314	2.69154	1.73995	11.3932	8.80737	6.08028	3.48036
0.0423515	0.0600443	0.031057	0.0280012	0.0191839	0.147419	0.0391259	0.0524237	0.00509444	0.198069		12.1297	8.88912	2.95801	3.79233	2.33564	0.920434	12.1517	2.69781	1.59192	5.27734
0.0428975	0.031711	0.117357	0.0136375	0.0603418	0.0886185	0.0112993	0.0319438	0.059128	0.0442514		10.5028	7.41868	7.50688	4.23428	4.31348	1.82302	8.03554	1.38514	2.01785	4.13049
0.120818	0.0514049	0.0405307	0.0389398	0.0632243	0.0171908	0.0966455	0.010741	0.0450228	0.0202295		5.76248	2.92231	5.78066	1.04149	8.88868	2.82789	2.89357	6.73988	3.98832	2.67715
0.0343044	0.0662772	0.0129099	0.0141505	0.159787	0.0560912	0.00880997	0.23827	0.0396365	0.0702377		0.811882	5.85862	5.05311	4.39029	4.69775	3.2925	1.96453	9.92275	3.78313	2.4168
0.0164957	0.0595561	0.0867568	0.0232734	0.00584361	0.122829	0.0266498	0.147364	0.0745161	0.157834		6.38369	10.009	13.0868	3.98557	7.08436	3.06847	7.12442	6.99509	1.9891	2.43213
0.127657	0.115257	0.0205429	0.0330215	0.0279335	0.0256023	0.0181084	0.116311	0.0117874	0.245515		8.55305	10.8207	11.4803	2.84806	6.52754	4.21439	5.13542	4.3401	2.32977	2.57997
0.0550962	0.0182441	0.020565	0.0385584	0.00718049	0.0362279	0.0238303	0.0237765	0.0558581	0.0675805		4.32658	13.4041	2.25288	2.92384	2.63	4.08973	3.57765	4.62998	4.52522	4.05104
0.191749	0.0083957	0.0714085	0.0134557	0.0360821	0.013085	0.108957	0.27044	0.231276	0.0271444		5.60464	17.4063	7.3469	1.65573	4.44663	3.89225	11.3028	6.32488	8.97835	5.26183
0.511907	0.0291396	0.086851	0.00881067	0.0263185	0.0989191	0.0648629	0.0299076	0.154284	0.0834551		4.30044	17.1912	8.4387	2.1654	8.42946	4.21284	8.49534	6.07546	14.8339	4.13603
0.0294623	0.0499837	0.0180169	0.0337848	0.109987	0.0254182	0.0122248	0.124905	0.00428256	0.0766818		2.98953	12.0403	2.65671	3.64685	6.51252	6.69646	3.52554	3.37482	20.317	3.37442
0.18448	0.0230835	0.0252725	0.00977144	0.0183129	0.0322824	0.048643	0.0593605	0.0302999	0.118989		5.64501	5.98091	2.54788	2.15222	4.94075	7.96609	2.41163	0.791785	19.8047	4.41659
0.0576392	0.145267	0.0577225	0.0236726	0.0356762	0.0296232	0.0645752	0.0422673	0.353127	0.0468114		5.53719	2.91874	1.07998	1.53455	4.95713	3.22588	10.6664	1.28763	12.6153	5.40564
0.00524423	0.0443439	0.0251627	0.046039	0.0100525	0.00428807	0.0439857	0.00977702	0.0224644	0.160683		3.8814	0.298755	0.917227	1.83521	6.54724	1.37353	7.18539	2.43697	6.45832	4.23483
0.0122863	0.132925	0.028728	0.0337346	0.0536766	0.0275014	0.0691182	0.0971658	0.318991	0.0612477		6.99456	1.85022	3.89148	1.57346	2.64873	3.2313	1.62505	4.24722	4.70424	3.96543
0.0373135	0.108762	0.0281358	0.0273147	0.0417964	0.0822675	0.0101842	0.011288	0.0906323	0.0236376		7.6076	4.12714	5.49589	2.05115	4.98699	14.5988	3.09261	3.28918	1.45541	4.2469
0.0592929	0.15112	0.139272	0.0968213	0.0760845	0.0385376	0.0622952	0.100957	0.0245024	0.546667		8.24346	5.85234	6.96117	2.59425	10.0964	8.11735	3.56304	4.06337	4.14291	4.2753
0.0500133	0.0261217	0.065857	0.0426695	0.0452417	0.0372798	0.0251904	0.0282587	0.137982	0.0787321		8.75229	2.74978	6.55862	2.95906	8.73409	5.27257	5.63299	4.26882	8.86913	4.41945
0.202942	0.126161	0.0649563	0.00785608	0.0382471	0.0160207	0.0373305	0.0291096	0.100555	0.0685255		9.38415	3.30795	6.95856	2.14915	4.62755	5.53681	7.83021	3.47512	10.6432	3.77057
0.147804	0.0395269	0.110277	0.0496432	0.0854288	0.00444488	0.0715468	0.127331	0.178895	0.0976155		5.49131	6.22778	6.37205	7.563	1.43333	5.13491	12.8949	7.42873	8.89218	4.77574
0.175083	0.129464	0.0773269	0.0491178	0.013607	0.0218997	0.125676	0.0858621	0.19272	0.0906196		3.09796	8.96907	3.20986	7.83234	4.81851	2.29047	7.77928	4.48169	5.68095	3.90314
0.193841	0.0600366	0.0342612	0.0118722	0.115269	0.01204	0.0295309	0.0543639	0.0611675	0.0613411		3.91228	6.66199	2.64375	0.238072	12.8285	4.33592	11.6446	2.83781	4.3453	2.67315
0.0353172	0.201441	0.0165831	0.0124647	0.0687786	0.00635634	0.0279193	0.148839	0.0232668	0.05997		2.50996	4.22672	2.98859	13.7347	19.3894	5.176	9.62778	6.05797	2.50956	4.42267
0.075348	0.013116	0.0086817	0.140283	0.0044691	0.138921	0.0187644	0.0894027	0.0750379	0.0118501		2.63973	3.38056	7.35507	18.1798	20.7983	1.93073	8.7463	4.71343	3.17419	4.46927
0.054194	0.0815498	0.128473	0.119025	0.0442038	0.0363829	0.00942112	0.0695886	0.0225383	0.0510659		6.74571	1.49978	8.61683	16.0406	3.60719	10.045	4.89335	3.2673	4.17551	3.4879
0.105395	0.0358284	0.0205848	0.0238262	0.00822383	0.037807	0.0135464	0.122665	0.0273475	0.0377635		8.8727	4.93339	5.49336	8.89681	3.3682	6.32234	10.5033	4.64653	8.85675	2.65948
0.089502	0.117001	0.195886	0.144592	0.237714	0.0377532	0.019599	0.0726466	0.0300406	0.245638		6.50865	7.5593	2.89434	3.35208	5.07678	6.28551	7.48181	6.64064	9.69952	1.79251
0.00203744	0.0359062	0.186009	0.087111	0.0375231	0.0225773	0.0886861	0.0428522	0.0206163	0.106176		5.01767	10.272	2.61139	2.09936	2.88315	4.05132	6.95921	4.89209	12.018	2.71863
0.0100092	0.0952524	0.0903035	0.097632	0.0938881	0.0240671	0.0184957	0.00629282	0.0288452	0.321815		3.51964	2.9651	2.41404	3.53373	3.10874	3.32649	3.58858	21.2919	12.4244	3.85493
0.106256	0.0931233	0.0679374	0.0663229	0.0438938	0.00735051	0.00735079	0.0439228	0.083101	0.165581		1.00244	4.97478	2.58443	4.31945	3.85038	4.03109	11.2335	7.50018	6.35699	3.18057
0.0186578	0.0280278	0.181417	0.0425663	0.0579871	0.0222136	0.0505975	0.0310137	0.0444469	0.100043		1.70162	6.78098	7.32582	2.16088	6.24951	3.93528	11.7412	5.99019	6.2075	1.37153
0.15725	0.0504558	0.139025	0.0814241	0.0603673	0.0586756	0.0223505	0.0822312	0.137434	0.506676		0.880882	2.93856	10.3172	2.71341	4.95386	4.27722	3.79806	0.179551	4.08158	1.60062
0.0314656	0.00690815	0.0120437	0.0146901	0.0405792	0.0674375	0.0400803	0.0102547	0.0535626	0.0578955		1.09228	1.08168	7.86341	6.56335	0.606691	2.68067	9.20112	2.53885	0.565977	3.64421
0.078706	0.0673584	0.0826685	0.0184888	0.384157	0.0213046	0.0531073	0.00194	0.0801697	0.138459		10.1173	2.82575	1.76738	8.46376	3.72114	1.62846	15.47	5.02463	4.44003	3.73276
0.0737429	0.0124873	0.0351436	0.0217622	0.125944	0.00810269	0.0412299	0.112136	0.142512	0.0319506		9.89688	7.38053	6.5527	4.08334	4.08879	0.798738	11.3229	7.9729	4.25394	2.25967
0.0590763	0.0129449	0.0387111	0.0532001	0.0114909	0.0958006	0.0469619	0.0602084	0.0276975	0.00792908		6.02012	8.03575	5.85465	2.56045	3.59821	3.6196	5.69397	12.1849	4.34888	1.28108
0.131201	0.0552174	0.0366501	0.0557983	0.0851726	0.0253562	0.0599735	0.0305405	0.0474815	0.141827		8.60026	3.31161	2.08657	1.74288	2.47306	5.28093	4.4085	6.07024	7.10407	1.44369
0.177445	0.00788588	0.00473442	0.0463494	0.0635194	0.0950023	0.0224317	0.0859932	0.0751934	0.0248588		11.124	4.1576	0.875168	1.35665	0.899421	6.74906	8.29333	8.17356	13.7782	0.9264
0.0618765	0.399773	0.0063531	0.0784365	0.00666358	0.0995032	0.0513619	0.230169	0.0607942	0.137786		12.033	3.04626	3.84057	2.51182	2.85268	4.01813	2.71072	9.82597	14.7022	0.722765
0.0510324	0.0553796	0.0209143	0.0151998	0.188449	0.0382229	0.0364191	0.101765	0.0104026	0.11895		4.11668	3.1788	6.59874	3.87946	5.05799	9.75116	11.6599	4.69063	14.6754	2.53001
0.0319158	0.132384	0.0165273	0.106403	0.135666	0.104977	0.135074	0.0177169	0.0858331	0.0957565		15.597	4.85513	4.35202	2.11117	4.62883	15.9635	22.594	4.72741	14.0378	3.98235
0.113167	0.00314559	0.0258829	0.037526	0.0493139	0.0283625	0.0930808	0.0055787	0.00677956	0.0353719		10.28	5.84457	6.45629	7.5674	0.471842	13.6024	14.7048	10.2586	7.88212	5.15514
0.132643	0.0340674	0.0268406	0.0563007	0.0560839	0.0910243	0.0134153	0.12877	0.0373024	0.18957		14.022	0.730308	7.2339	7.46621	6.29798	8.35965	4.27069	9.468	5.64162	5.7215
0.08979	0.166411	0.0851005	0.0982998	0.00956577	0.0177435	0.0621811	0.245135	0.0303968	0.239551		19.2913	7.7163	5.65497	3.38385	8.11739	3.01106	3.64036	4.49663	11.337	6.0272
0.0670973	0.136698	0.0814149	0.00615525	0.00697516	0.0132362	0.0342346	0.0657028	0.0673091	0.038132		21.662	16.1629	4.026	6.65256	2.81603	2.49267	0.376105	6.03186	6.5323	6.05874
0.0282547	0.0236966	0.0729328	0.0278701	0.0962003	0.0197284	0.0754664	0.144062	0.356022	0.0599971		13.4637	18.71	10.3586	7.92778	2.94473	3.26311	7.72978	10.159	2.23697	5.58974
0.0559611	0.0316237	0.0310543	0.0543825	0.116056	0.0264554	0.0887737	0.0405968	0.0609213	0.0523097		2.68546	17.932	2.32937	4.15054	3.78915	5.82342	6.69212	7.81232	0.76812	4.43442
0.0628627	0.0535353	0.0193117	0.0200139	0.0629353	0.0468841	0.0209973	0.0237903	0.351111	0.182913		12.9296	15.5714	0.746602	2.42313	2.79452	6.30634	3.11635	3.62119	4.77099	3.57739
0.0620486	0.0231571	0.177266	0.00491578	0.116046	0.0330752	0.0949392	0.0337881	0.102907	0.00452896		17.3213	6.16468	1.92419	2.6285	1.69933	1.02411	10.2982	8.00924	8.22571	5.42612
0.0175161	0.0157471	0.0317581	0.0612547	0.00722827	0.0168762	0.0172992	0.00540064	0.132219	0.213899		6.71042	8.44545	2.0866	5.36945	2.0741	2.42249	7.62225	5.60535	9.93106	6.5973
0.11387	0.0965558	0.0247547	0.0384711	0.0057873	0.0261614	0.00327	0.0631827	0.158876	0.0689199		5.78591	14.9001	2.79885	5.17068	7.23063	3.89897	2.70974	7.61713	10.2234	4.72012
0.190779	0.00750772	0.0886316	0.0578629	0.030481	0.15864	0.0763946	0.0766113	0.0369807	0.0202413		11.3143	13.0378	2.45862	1.08732	8.01538	2.49817	9.6113	8.21626	10.2199	2.74426
0.0240609	0.00689453	0.00948732	0.099063	0.0192541	0.00816827	0.0200605	0.00608082	0.0976937	0.0802954		8.30957	1.90698	2.49774	4.43489	7.06393	3.9285	11.2899	8.19252	8.40826	1.98623
0.001183	0.0518668	0.0106977	0.0396432	0.0212131	0.098273	0.149534	0.112229	0.0131987	0.0398012		19.6646	2.53623	2.58177	4.06299	2.44386	4.99377	9.3291	7.88868	1.89033	2.51928
0.0318622	0.0187275	0.164852	0.0176281	0.00651808	0.104635	0.179361	0.0685167	0.0177052	0.0607032		19.7039	2.21884	1.65192	3.69968	5.81618	3.16476	7.83181	10.1222	5.07084	2.98225
0.058392	0.108858	0.00781845	0.000817781	0.0694249	0.10513	0.062339	0.0310271	0.0499034	0.112934		17.664	1.50093	5.47011	3.20917	4.98947	5.1536	10.7679	8.84915	5.32152	3.07004
0.054391	0.15087	0.0947595	0.0503566	0.0844466	0.0328799	0.0479051	0.0396353	0.122266	0.219507		15.8217	0.749979	7.11245	1.9868	2.70689	7.15406	5.60626	2.58119	7.50768	3.6594
0.0332964	0.0298831	0.0250854	0.0138724	0.0368945	0.0574374	0.0134	0.0352642	0.0559051	0.0482249		13.7862	2.06922	5.51216	2.07864	7.60903	3.45641	9.86949	12.5879	5.03596	4.64362
0.0317041	0.0158098	0.00613683	0.0400297	0.032626	0.129052	0.029799	0.0452209	0.265753	0.0352214		13.3395	3.20547	4.55587	2.91351	8.91389	4.81998	10.6584	17.1086	9.37637	5.68833
0.0088716	0.033344	0.151142	0.0240596	0.0527287	0.106119	0.0799688	0.0132751	0.129734	0.0433143		14.2426	5.48365	5.13553	4.1753	5.2814	2.95769	5.93426	7.32509	12.788	4.44265
0.057795	0.103601	0.0262405	0.0917469	0.0545093	0.229435	0.0637255	0.135352	0.0816979	0.0369517		8.94128	5.52871	8.31288	1.99172	1.07039	2.29571	0.599678	3.62383	7.58698	1.80251
0.0496845	0.0222393	0.0328489	0.0627992	0.0165049	0.00574823	0.0548769	0.0509728	0.137102	0.0157251		5.06938	5.89749	7.46489	3.49144	11.1345	3.40197	15.11	4.01115	3.09923	2.92214
0.0567567	0.0985502	0.0655903	0.0541786	0.0289262	0.0705567	0.0218509	0.0813133	0.176288	0.020964		10.7032	7.81389	6.29873	6.59745	5.05827	1.28752	4.30335	2.04327	3.81457	2.6253
0.345228	0.0962019	0.0423202	0.00344939	0.0870648	0.0560199	0.0736863	0.0108021	0.0339078	0.34385		6.72174	8.12536	5.02683	7.01733	7.99822	2.12909	2.79942	2.7733	2.68098	0.555112
0.0410199	0.125914	0.0295127	0.121091	0.0561853	0.0130451	0.00796321	0.0147721	0.0727902	0.0959562		7.56008	4.54509	5.79722	8.11328	7.90062	1.66012	1.71819	3.93717	6.75137	3.24252
0.0235487	0.0150828	0.0515478	0.0468764	0.0639659	0.0693938	0.040667	0.0220172	0.0832553	0.0973828		10.811	1.87599	5.95223	8.66346	9.13727	1.17384	1.5089	2.01612	0.499785	6.86479
0.199777	0.00676425	0.0663394	0.12288	0.0397439	0.0130389	0.0591821	0.0334449	0.161053	0.0446107		2.8211	2.92829	6.8758	5.58462	7.3088	3.35039	3.76252	5.11477	2.6902	8.98366
0.112453	0.0105479	0.0860636	0.0189349	0.022211	0.0828538	0.0611412	0.127923	0.22831	0.123669		4.68597	2.81478	3.01839	2.14007	4.87144	7.07821	5.7153	6.68465	3.94927	8.10871
0.0823392	0.0890663	0.0527681	0.043348	0.0943229	0.0678616	0.0391119	0.0971854	0.0222576	0.00356338		5.12985	4.11337	0.909687	4.48229	7.40359	6.07395	4.7238	7.54971	4.76769	8.22676
0.148853	0.0112953	0.189109	0.134355	0.0225822	0.0734162	0.0106425	0.197139	0.0646222	0.0816287		6.56543	4.50968	0.767829	3.52744	4.10224	5.38453	2.8469	5.90098	6.07839	7.37871
0.0157146	0.0792097	0.148207	0.026794	0.0442582	0.0359091	0.06248	0.0346218	0.0751844	0.105626		4.81844	4.1857	3.59266	4.8557	1.39841	7.02944	1.40362	3.95687	6.56493	4.94199
0.224493	0.0399456	0.0727864	0.106708	0.00782201	0.0599843	0.0129865	0.0336322	0.0643928	0.127508		4.7663	4.4367	5.85272	10.7056	2.47486	4.08885	2.97574	5.09697	8.39515	2.3865
0.0582592	0.0252134	0.0152322	0.031261	0.06638	0.00605296	0.0119248	0.0799278	0.102669	0.00899294		9.18797	4.77324	11.4941	4.0575	6.26086	3.38847	6.76158	5.64237	10.252	3.70876
0.066424	0.0125517	0.170098	0.078247	0.0150773	0.0159661	0.0410568	0.0653899	0.046847	0.0176126		12.1962	3.25181	5.90874	2.60265	7.13301	3.04759	8.3583	4.28433	8.88611	4.76831
0.116387	0.133824	0.0259532	0.223472	0.0348499	0.0295493	0.068974	0.145217	0.0833627	0.0808055		8.01106	8.68264	1.21239	6.53723	4.81328	5.01791	6.18741	2.94315	5.9849	1.30699
0.130026	0.0116636	0.0889812	0.0141854	0.00357422	0.0201771	0.029058	0.066986	0.0281361	0.0124997		15.1589	6.46645	4.86827	11.4442	2.84058	2.04877	3.48095	4.04993	4.50444	3.32379
0.0683012	0.173705	0.0548957	0.0230156	0.0406666	0.151143	0.0315929	0.0142623	0.0902002	0.139009		12.6656	2.37774	10.9547	11.0783	2.17231	4.793	2.84746	5.27135	4.1497	1.23794
0.0239866	0.079523	0.0201056	0.0336608	0.0425196	0.0948791	0.00554158	0.0255227	0.203907	0.19461		7.86054	9.27001	14.4637	5.75469	2.75478	3.36878	5.85208	6.21215	5.71353	11.168
0.00711661	0.0770642	0.0825001	0.0153745	0.0386834	0.0234763	0.0426207	0.102398	0.0126454	0.0177395		5.91859	3.09905	15.2515	4.22858	3.84789	3.02564	5.38614	8.07265	4.86133	9.32318
0.0436736	0.0819335	0.0625611	0.0549545	0.103215	0.0183778	0.018469	0.00374473	0.289119	0.12319		6.37666	4.32764	14.7298	5.65196	3.78088	5.06406	9.40537	8.58207	7.29563	6.06049
0.0290184	0.0360576	0.0700495	0.0173799	0.0185873	0.0203764	0.017067	0.0405722	0.0273313	0.265368		4.05287	7.95575	10.4972	5.62359	0.987003	3.59483	9.78727	7.2697	10.4723	1.52778
0.0726707	0.129137	0.0590398	0.00952771	0.0157375	0.00753141	0.00657381	0.0501174	0.0629978	0.0960382		0.898615	8.44988	7.3888	9.99356	2.08071	6.3225	6.22878	4.82674	10.4125	2.86343
0.014792	0.0660158	0.0172476	0.00946572	0.0132972	0.0160191	0.0353812	0.0615357	0.0322393	0.0283652		7.75288	10.0332	6.76934	12.2983	2.33551	6.19819	10.3116	2.92051	9.9716	2.8505
0.00284567	0.121018	0.0355311	0.0331784	0.0095758	0.0247059	0.0270157	0.0279103	0.180019	0.0175584		12.0304	5.28208	6.38798	5.70602	3.27145	3.84317	18.0474	10.5713	8.28428	3.26066
0.161628	0.0280165	0.0111846	0.0656762	0.00383984	0.038757	0.0222622	0.102758	0.00459104	0.12386		12.2366	8.68681	5.86101	0.204271	6.34251	6.40027	17.9234	13.0939	3.03414	2.78977
0.378755	0.0196389	0.00977418	0.0262555	0.0376082	0.01164	0.0667368	0.00584084	0.0261372	0.151584		11.7597	13.264	4.9266	0.861978	5.87155	6.47924	8.11555	13.7074	3.47819	1.98813
0.00669701	0.0101626	0.00193823	0.0814531	0.0291876	0.0260012	0.0547874	0.00881006	0.173778	0.224274		13.035	9.6646	4.35173	4.42582	2.13915	3.03679	8.23347	10.6519	5.12895	7.86404
0.0144919	0.0545171	0.00587252	0.0172537	0.090074	0.100149	0.0364373	0.0998319	0.0890781	0.110217		15.0123	6.2908	4.30617	7.5186	4.04351	1.13751	3.22042	7.69271	3.41992	6.5503
0.118151	0.00453049	0.0173906	0.0188613	0.219774	0.165548	0.00807038	0.0507815	0.0146868	0.025595		17.1761	3.73017	1.86763	6.00315	2.76387	4.63424	4.46644	3.77426	1.12463	5.7101
0.0256968	0.0519695	0.0759078	0.0381427	0.104203	0.0458031	0.0103965	0.0473215	0.025149	0.0101286		20.7711	0.481337	2.25442	4.72842	5.05127	7.07938	5.6183	7.24	4.64958	6.98859
0.0148345	0.0587355	0.00273009	0.0444792	0.00469206	0.0507829	0.0179013	0.037154	0.0367431	0.133869		21.9183	1.40903	2.65516	6.03009	2.3096	5.46394	5.28059	12.5676	7.70256	4.74368
0.126259	0.0211275	0.0128174	0.0528842	0.0400897	0.0242562	0.00838329	0.0195764	0.0124427	0.0727414		17.4675	2.62043	1.942	3.24806	1.25111	1.14535	7.11499	14.8958	10.0358	5.92802
0.0106676	0.0244524	0	0.0653	0.0100544	0.0186303	0.0308144	0.0237572	0.189725	0.0506393		12.0079	3.62745	3.35621	1.70163	2.08552	6.12248	7.40108	10.7985	7.1339	4.67853
0.0154248	0.0146304	0.167112	0.0375241	0.0350082	0.0329092	0.0373473	0.260606	0.0270924	0.0756235		8.69541	4.36779	3.12923	1.86525	1.93815	7.90706	6.2748	7.83421	2.83418	3.46386
0.0490443	0.0261156	0.00420596	0.0036871	0.0244365	0.102465	0.0499109	0.0840795	0.126382	0.110916		7.61143	5.75188	3.43148	8.08549	4.25693	5.54998	6.70901	5.82266	4.00626	6.16601
0.0151867	0.244819	0.0162134	0.0525078	0.107095	0.0418458	0.0163035	0.027548	0.00930578	0.121799		8.96974	2.85895	5.72191	6.50653	4.21115	1.50805	9.61092	4.48633	3.45069	4.95574
0.304513	0.115734	0.00026653	0.0576655	0.021278	0.0833029	0.049082	0.108446	0.127241	0.0944648		10.791	9.01047	9.3772	10.7887	4.13991	11.1023	11.9593	4.23923	4.73523	3.56343
0.0275908	0.0892391	0.0737764	0.0168856	0.0918251	0.0260534	0.0143508	0.0911795	0.092009	0.116317		9.77506	4.1351	11.6027	8.53156	6.38415	15.1314	13.9884	10.5214	3.60907	0.874763
0.0397875	0.0808538	0.0643589	0.0185864	0.0138546	0.0293692	0.0632675	0.0182013	0.028503	0.00160043		9.99958	5.68359	7.91381	6.62436	8.66301	7.43172	7.08796	13.633	3.96104	4.13683
0.00870131	0.110035	0.11762	0.11688	0.0420794	0.0378019	0.0319759	0.0226735	0.199526	0.066073		7.29498	5.56772	0.206101	17.4323	8.66606	4.89461	10.0088	11.5713	7.5528	5.75268
0.00789231	0.0088088	0.00443142	0.00180129	0.0105234	0.0341571	0.0121251	0.0313296	0.239091	0.070453		3.79251	5.86073	6.57313	15.3596	4.45431	8.7218	9.42422	7.40583	9.18909	5.21958
0.0878812	0.0368507	0.0310165	0.02087	0.0249824	0.0155473	0.0358589	0.0138093	0.0251447	0.0397924		14.8233	1.43552	5.87217	0.784615	2.29479	7.59	4.80798	3.81934	6.67118	5.62152
0.00661884	0.0624164	0.00105839	0.19036	0.0728717	0.173822	0.0197393	0.308083	0.0877004	0.320119		15.7403	9.663	0.383108	2.17715	4.13809	3.56216	8.15328	4.62445	4.54311	6.23218
0.0109432	0.0504529	0.0705324	0.0961265	0.139327	0.0264028	0.0810552	0.0350518	0.106541	0.032472		7.91006	17.386	6.06214	3.07218	3.94059	4.64664	9.58865	5.05056	3.94818	4.57324
0.0555513	0.0124463	0.00188465	0.163431	0.0313626	0.00871176	0.0165709	0.0922259	0.0440267	0.121914		8.77682	23.9971	6.31397	2.41595	2.60299	4.13066	9.84547	4.72373	3.39006	1.77166
0.431826	0.0675236	0.000577933	0.0479701	0.0188267	0.0806714	0.0464193	0.0191961	0.00335952	0.0226064		4.72966	25.9363	3.31121	2.42768	4.84104	1.42484	12.4525	6.98725	27.7673	2.11918
0.0163708	0.158925	0.0591086	0.0362845	0.0386328	0.00654406	0.0617728	0.0382362	0.0685129	0.0730766		2.67823	12.5705	4.44954	4.30866	7.98502	1.05708	3.51251	9.38086	3.41151	4.37239
0.00147587	0.0554566	0.0657221	0.162847	0.0289614	0.143803	0.0160169	0.046071	0.116987	0.164936		4.03538	17.5341	7.97119	5.48806	5.34771	3.48478	6.52303	8.75073	2.12089	3.51255
0.00026653	0.0514613	0.00109144	0.101233	0.0274973	0.1036	0.0422204	0.161041	0.0365651	0.191267		6.8004	16.4933	9.77828	4.21936	2.7415	6.03025	7.50865	10.1972	1.92888	1.22221
0.313298	0.0392636	0.00499783	0.122362	0.0214515	0.0764386	0.0362432	0.0460233	0.0475675	0.156677		9.00564	4.26961	10.9381	3.21702	6.80992	3.81101	9.3741	14.0278	2.5654	1.45263
0.00120934	0.0345441	0.00120934	0.0367088	0.0401481	0.173635	0.0273166	0.0265518	0.0293647	0.0364774		6.01795	1.84756	9.68291	3.73488	1.97975	4.08762	7.90581	17.1673	2.29949	2.75132
0	0.207647	0.0386325	0.0162475	0.0326943	0.0245286	0.0417889	0.0161022	0.0466313	0.184348		8.41709	3.25789	7.42776	4.22956	4.44227	10.0011	1.62554	16.3868	1.88951	2.89275
0.00452008	0.146832	0.0174316	0.0432958	0.0115143	0.0258211	0.0330088	0.0156915	0.0794035	0.0207158		25.0567	7.93443	1.01327	1.86024	2.35157	7.66307	2.71267	11.1835	0.787622	1.38699
0.0167012	0.0972535	0.0176993	0.0934347	0.0618616	0.111121	0.0871425	0.0246924	0.0691406	0.0597072		17.5339	7.86647	1.60311	3.13899	1.42019	9.80887	2.80799	9.47391	0.208936	1.01575
0.0168678	0.0370747	0.0207794	0.0707364	0.0316691	0.011119	0.0276324	0.12088	0.241553	0.00403634		11.2879	3.60004	3.60594	5.06017	3.04129	10.4252	3.28295	6.91115	1.22598	0.565455
0.116155	0.135271	0.0473276	0.0686887	0.0414403	0.0211181	0.00746811	0.19911	0.0087968	0.0593076		2.1438	2.6638	6.86297	4.0244	3.50039	7.40846	2.46174	2.15738	3.48476	2.50329
0.047878	0.0382217	0.0238336	0.057134	0.0373299	0.0323258	0.0979886	0.00528716	0.115766	0.066183		2.5912	0.568953	8.92622	4.00457	1.65755	3.98312	5.79218	3.86615	6.73389	1.91187
0.00977738	0.0762872	0.0152877	0.051119	0.048692	0.024847	0.034789	0.164475	0.0652221	0.0403597		1.77165	13.9201	10.2484	3.46417	1.58173	3.44473	4.12347	4.57463	10.6093	4.04474
0.115249	0.048552	0.00534876	0.129397	0.0588991	0.0495617	0.0377727	0.0371547	0.150685	0.0222623		3.62585	6.28378	9.43622	5.45339	3.30826	5.24103	4.76747	7.03275	12.7543	3.86433
0.0145191	0.0804617	0.124741	0.012252	0.0263003	0.072989	0.0196389	0.0587764	0.0815415	0.0940696		8.5504	6.65752	5.96042	7.80792	4.84259	6.26177	7.47332	6.96589	10.8899	4.54387
0.143667	0.0170237	0.0679393	0.0103876	0.0315668	0.0115083	0.0178144	0.0718739	0.0892753	0.132299		10.0088	9.34707	7.89775	8.40578	4.67393	3.8933	7.44652	6.05386	10.2218	2.57871
0.00646846	0.0201052	0.0436039	0.00709048	0.051886	0.00152605	0.0344406	0.0673264	0.0152226	0.0440471		9.23563	2.15253	11.2648	8.27743	4.06699	4.29097	5.40682	1.97711	11.989	2.92416
0.0250195	0.098115	0.0226602	0.0399357	0.0931025	0.020129	0.00580041	0.0166195	0.0817387	0.0183375		7.46868	4.78453	1.4063	7.68584	7.79384	6.46682	3.9128	6.50845	11.7566	7.17242
0.0360965	0.110429	0.112107	0.167229	0.00578112	0.161234	0.0822833	0.128589	0.0633589	0.00777694		7.45187	5.35787	3.61986	10.7085	5.84962	4.06288	2.64778	9.73487	7.46276	8.39946
0.0738156	0.224041	0.0511906	0.0760506	0.00252953	0.282268	0.0261356	0.0299217	0.0795782	0.0143606		8.82134	2.43245	4.3185	5.78238	5.37946	0.28029	0.553111	3.67182	1.30578	14.8619
0	0.0259723	0.131537	0.0774822	0.0517229	0.0383201	0.0148826	0.0366018	0.100706	0.0444622		9.58732	2.63161	2.39363	2.10854	2.11288	2.34044	4.21666	5.16976	11.059	18.3994
0.117613	0.125017	0.0623254	0.00649331	0.0113733	0.0977768	0.0165366	0.034018	0.0150413	0.0161149		20.9314	2.93879	3.06734	5.39522	4.31118	4.0801	1.12741	6.69021	15.6519	17.4627
0.202527	0.0275915	0.106381	0.0614407	0.024132	0.0292197	0.0146886	0.408905	0.145696	0.00671871		20.4122	5.35716	7.53298	4.95226	11.1851	3.54394	10.2935	6.98117	11.5585	15.1652
0	0.0500284	0.0168224	0.0100423	0.0286568	0.0265136	0.0200439	0.110762	0.04952	0.00783472		17.1377	7.97069	6.42888	5.4975	14.787	4.60676	21.6511	7.53304	3.33904	14.8101
0.126607	0.0234872	0.124792	0.0116	0.0258358	0.143006	0.0129753	0.0874675	0.0805111	0.0296673		7.41429	8.12257	3.22968	8.30332	13.0885	4.78241	21.9512	7.72167	1.49687	14.5407
0.013	0.0174069	0.00694198	0.132928	0.0202122	0.0543157	0.0146111	0.0451793	0.00598452	0.0140007		4.46156	2.49082	6.75214	7.66047	11.3287	1.6887	13.704	9.05753	2.91808	11.3162
0.073039	0.0211379	0.00839827	0.0514516	0.0275797	0.048649	0.0119058	0.0473932	0.134442	0.0949681		5.41003	4.67243	4.8569	4.77117	9.82147	4.15866	7.48399	10.6197	3.43363	8.04567
0.0357163	0.223114	0.0195578	0.0306296	0.00451938	0.11444	0.0440458	0.018965	0.00985892	0.036772		4.1119	12.7794	10.2348	6.91136	11.9566	5.62203	6.28994	8.13738	0.340304	7.64197
0.0184075	0.180205	0.0341702	0.0382002	0.100662	0.153405	0.0336817	0.0168377	0.0771958	0.030725		6.73039	15.2169	9.94111	4.48683	7.39978	3.51472	5.22262	2.72693	3.88274	6.55962
0.00710202	0.0292075	0.0157475	0.0249353	0.0223859	0.0204181	0.0801066	0.0265772	0.074326	0.0257612		9.33125	7.63322	5.21302	13.0404	5.74774	1.67373	5.49401	3.29126	5.73809	3.96266
0.0669239	0.0898151	0.0615166	0.248112	0.0497526	0.136509		0.0255597	0.0394232	0.0349295		15.8428	3.52393	2.35855	13.5815	4.65468	6.7171	9.16292	3.42164	6.26312	3.62887
0.202465	0.0258253	0.0579208	0.0235626	0.0145965	0.0234344		0.0556242	0.0813471	0.00245399		18.9973	3.69236	5.27217	8.5682	5.31307	7.53098	13.2485	8.7814	6.95634	6.35668
0.0133389	0.0512684	0.0411384	0.00309069	0.0226113	0.0445231		0.0248384	0.0727707	0.0274056		19.1387	7.92578	3.31153	1.15719	2.77004	4.99795	12.3745	10.1031	6.92089	7.48182
0.0221909	0.0222969	0.204551	0.165659	0.007988	0.00782865		0.108974	0.0507333	0.0197185		20.4759	12.5672	2.83322	8.24393	4.21876	0.706671	5.73365	10.8883	5.91946	7.33581
0.0147965	0.0312845	0.0164385	0.0231697	0.0222492	0.0162306		0.0407275	0.0659416	0.0127399		22.158	10.9887	3.61846	11.9177	6.86601	4.39146	2.4316	12.1444	4.92906	5.39762
0.0178063	0.123327	0.0922366	0.0663645	0.124024	0.0981626		0.062172	0.236075	0.0542728		21.2176	5.09649	5.31459	11.4291	4.67091	5.33579	4.34458	11.9609	3.87566	3.94796
0.0566804	0.0243069	0.0777068	0.0109922	0.125795	0.0351793		0.102968	0.0471228	0.0610224		14.8663	14.0146	7.46721	5.32267	2.30352	3.07135	7.5836	2.33413	3.89237	5.31852
0.043938	0.270859	0.0239595	0.00839417	0.0387376	0.0360554		0.0504331	0.0645757	0.150552		6.05513	12.4956	4.11424	5.90254	8.56884	0.79551	5.95473	4.28604	6.34891	4.62278
0.00226774	0.0394077	0.0209275	0.023115	0.188657	0.0493058		0.0703487	0.0309583	0.0543521		2.80224	5.34063	3.89976	5.37146	0.500393	0.141897	1.94241	6.24628	6.07308	1.33691
0.00299662	0.0153697	0.221803	0.0161906	0.0065735	0.13325		0.035854	0.0385544	0.431913		5.49857	5.2074	9.78161	2.94501	5.43203	1.32815	2.53589	5.70851	6.30035	2.86696
0.00226774	0.0830139	0.006775	0.0467438	0.107586	0.0432945		0.0389048	0.0134305	0.0693478		7.22823	7.61375	11.4044	2.28095	6.18085	0.243483	3.49569	4.03779	2.60864	7.47908
0.264869	0.101833	0.0331211	0.0799991	0.199689	0.0201563		0.0134902	0.0169882	0.0531413		17.5652	6.67449	11.3132	6.18626	5.32098	3.3705	2.26347	8.37316	3.22092	13.1956
0.00599324	0.00716115	0.0475879	0.0613622	0.0134347	0.0948613		0.027912	0.0485111	0.539039		16.5074	3.64407	8.39888	4.83529	14.1059	4.99551	2.69016	12.053	6.24493	16.0018
0.000115581	0.0221438	0.103933	0.00278685	0.0156808	0.0141417		0.0275254	0.0348321	0.0384593		11.3623	3.82929	4.75102	5.44486	16.2666	9.99043	6.33366	8.06386	6.33545	13.1101
0.0127553	0.0682707	0.145251	0.0347285	0.0174328	0.0842037		0.0598827	0.0227393	0.0813389		2.73422	8.75146	10.9507	6.89657	15.0643	8.59804	6.35616	1.3172	4.44335	7.70041
0.000791864	0.00877048	0.0452917	0.0497928	0.0719333	0.0314511		0.0271618	0.0734887	0.0585673		6.85478	8.8822	17.1383	5.89631	9.88367	13.4948	5.92311	1.47521	2.82271	4.96253
0.0462905	0.015178	0.00864477	0.0572295	0.0198393	0.0204585		0.0297878	0.0877472	0.0691797		9.81738	2.85806	17.2675	3.64742	7.28323	6.65172	4.63152	6.58442	2.95511	4.73041
0.00452194	0.052333	0.0443711	0.0706599	0.0439537	0.0429834		0.0642323	0.0685695	0.038988		8.67183	7.90341	9.21032	2.84779	7.49333	2.14771	1.63045	11.8739	7.05899	3.26612
0.102485	0.167199	0.110588	0.0250688	0.0605674	0.0176728		0.0460721	0.0107785	0.270138		9.59613	9.66951	9.89693	6.22568	10.4379	3.26117	2.24907	12.8382	9.90872	12.2697
0.00378848	0.0252389	0.0114863	0.0756348	0.0263053	0.0114454		0.029913	0.00279342	0.170694		11.2697	1.36254	17.4131	7.43367	10.2155	5.35744	4.04863	11.1417	8.77789	20.1136
0.00705163	0.087038	0.0257368	0.0106435	0.019685	0.0224503		0.0301131	0.0933883	0.325292		12.1613	3.4007	16.1332	4.29232	9.31077	6.26916	5.73177	7.83447	6.03109	20.1691
0.0303441	0.0818028	0.176096	0.079224	0.165352	0.125212		0.0170258	0.0774257	0.105122		8.23485	4.95678	6.48681	9.42984	1.58656	5.36545	3.90175	4.54003	3.01651	14.587
3.69482e-15	0.185597	0.104696	0.00575882	0.11242	0.0106178		0.012944	0.237398	0.613304		15.0374	1.98212	2.95872	13.1745	5.83728	4.74964	0.806148	12.8089	1.47747	7.52709
0.00530036	0.1485	0.176743	0.00682997	0.109626	0.0523566		0.0114689	0.17915	0.078563		19.7928	2.59804	6.61663	6.84079	8.83053	5.04286	3.14774	13.2778	1.06418	4.18782
0.0112576	0.0267098	0.053495	0.0333571	0.046011	0.157731		0.0298373	0.185369	0.0273316		20.7569	6.54243	6.19926	8.57251	7.27112	3.1487	5.74959	3.466	2.07061	4.46262
0.00147587	0.0844002	0.048977	0.0736786	0.0336681	0.0198805		0.0225095	0.149385	0.0299898		18.8066	6.78385	5.04233	15.7492	7.30835	2.909	4.10652	6.42943	7.37749	4.39223
0.195389	0.110008	0.12734	0.169173	0.0202442	0.0339181		0.0180376	0.0930656	0.177076		11.8712	5.12032	5.12079	11.1657	4.92654	2.22215	1.55299	7.99212	12.3697	3.71759
0.0387668	0.0279828	0.0186146	0.0830751	0.0363138	0.0582925		0.0297876	0.104609	0.0926374		6.08291	1.35903	4.19689	5.53005	4.47269	1.23608	6.25813	3.89177	15.0125	8.1077
0	0.168616	0.0512074	0.0608382	0.122417	0.0528264		0.0204562	0.0373785	0.135249		15.2811	5.04695	3.8309	6.04038	4.97616	1.96768	5.75056	2.11859	16.8153	10.7961
0.00144553	0.0274301	0.0265325	0.0966123	0.0386961	0.0288092		0.0911511	0.0428449	0.0193988		16.1425	7.89487	3.97555	1.96963	8.97647	9.22299	2.88406	2.3427	19.6991	11.0837
0	0.0552504	0.00894444	0.0472648	0.0287205	0.0212939		0.085887	0.0694046	0.0337327		11.5177	4.42573	2.28536	5.83874	14.2342	3.70953	4.05503	1.75428	19.5899	12.8163
0.189566	0.0512169	0.22583	0.0146053	0.104026	0.00494956		0.0594975	0.0258865	0.0229837		8.42399	8.0154	3.48163	3.50097	14.1365	7.24065	2.8491	0.558931	13.7554	18.7476
0.00747387	0.0842779	0.102735	0.0337416	0.0711074	0.0597435		0.0229389	0.065413	0.0368159		7.35151	6.40178	3.32455	6.71927	4.67988	7.79551	3.84719	1.67842	6.76806	18.8294
0.0259636	0.0513787	0.0834981	0.00432698	0.0414314	0.00849865		0.0112146	0.0172619	0.0606152		3.69302	6.16915	3.63099	6.36884	4.79891	3.93705	5.65671	4.62154	5.08336	14.7278
0.00120934	0.061476	0.0362544	0.0358564	0.0247657	0.0259737		0.00560935	0.0819272	0.0616012		10.1327	5.30534	2.77928	2.85895	11.6611	1.54839	1.89347	5.57742	8.04528	9.01122
0.0960493	0.027056	0.0207078	0.0828871	0.0800841	0.0839722		0.0457786	0.0272712	0.337915		3.65996	8.53495	3.83053	5.35005	7.86089	2.14309	3.86624	6.88315	11.4544	10.7795
0.0646404	0.0160553	0.0718916	0.0585154	0.00590141	0.135723		0.0137804	0.187178	0.327338		5.1627	11.74	2.55583	4.54242	11.6993	1.33924	2.94092	9.96976	13.3351	16.391
0.405904	0.032338	0.0488403	0.0670214	0.0226665	0.0127317		0.0557042	0.125632	0.0943804		7.11587	11.2184	2.94781	1.81816	5.14506	3.39041	2.27419	12.8635	14.6466	19.6269
0.12427	0.0070683	0.0581928	0.21277	0.0675018	0.0378066		0.0496277	0.0149493	0.00918177		5.43238	7.36946	4.63378	2.89188	3.73239	4.28776	3.18751	14.5579	14.4729	19.2103
0.174681	0.0231902	0.118763	0.0713957	0.0193253	0.0243909		0.0324212	0.184682	0.0209507		3.70488	4.83807	4.74928	7.66633	5.89788	1.7147	6.98873	13.3262	10.3653	14.2036
0.00773395	0.0524062	0.0469614	0.119374	0.0367279	0.0524837		0.147296	0.0748212	0.00424915		4.68413	4.85116	5.23812	7.09137	8.5679	0.768888	10.5452	13.4562	2.39921	6.82383
0.0504286	0.0631288	0.0200909	0.049337	0.0420786	0.0413245		0.0258971	0.141326	0.325284		6.63195	20.0182	4.24996	2.49977	8.38344	1.84924	10.5482	16.7205	7.21948	9.11742
0.0109231	0.0409354	0.151689	0.0278971	0.0160856	0.00547157		0.0700334	0.105126	0.322994		10.3088	9.77977	2.28619	0.66124	5.18246	1.25165	3.29814	16.8441	11.5527	9.36153
0.124864	0.0145324	0.0165002	0.123518	0.00694685	0.094294		0.100481	0.0565007	0.0677216		11.8675	1.68623	1.83561	8.71341	1.78736	1.86299	12.1846	10.4179	10.7734	4.62283
0.0516926	0.050912	0.00218302	0.0594276	0.0894339	0.0042167		0.0313093	0.032842	0.0531851		10.6101	14.9689	3.95703	2.88757	7.89914	5.39761	9.55953	6.87003	11.0219	4.86732
0.00659781	0.131015	0.0108971	0.0447932	0.0185736	0.0785881		0.0546817	0.00883634	0.160816		8.65341	16.2114	3.96809	5.37572	10.6786	6.10023	5.50063	9.59203	12.4332	8.65732
0.114918	0.0257801	0.03402	0.0908869	0.0397788	0.0193869		0.0278263	0.121356	0.137452		8.97035	10.4696	2.0833	5.80843	13.5537	7.07629	12.8758	14.3584	7.55206	10.9242
0.0409713	0.0945783	0.0254954	0.149532	0.0796242	0.068289		0.0725366	0.0744033	0.158913		10.2999	6.12722	1.5827	6.11643	13.4211	1.83716	10.2873	11.3096	2.26559	10.9274
0.0382024	0.0851789	0.352325	0.0510105	0.0733067	0.0244797		0.0188145	0.141259	0.0817148		11.3149	1.91709	1.00095	3.97321	8.89374	0.93675	5.34076	2.09729	5.87482	10.5358
0.116223	0.0212095	0.00279752	0.0127131	0.00789669	0.104023		0.0556036	0.158256	0.0505832		9.77632	14.6069	0.987323	1.00641	11.5416	0.440454	2.62951	5.68498	9.65514	12.2005
0.0785527	0.0295178	0.11762	0.020499	0.0324103	0.112256		0.0496178	0.0696918	0.0299393		6.59513	16.5043	1.7111	1.95537	5.71131	1.3101	7.49578	6.3512	7.31802	13.3865
0.189597	0.220895	0.116427	0.0934745	0.103925	0.0185677		0.0666426	0.0131449	0.149218		3.83175	11.0868	2.04934	4.63038	2.75656	2.75785	1.48903	5.72656	6.22586	10.6485
0.0133662	0.0459572	0.103602	0.0139344	0.0645755	0.01225		0.0146455	0.189441	0.0323104		4.38665	7.42334	2.38897	6.12632	6.67641	2.28983	2.47952	7.77349	8.59857	3.42019
0.174361	0.169076	0.081964	0.0487351	0.149811	0.0321105		0.296154	0.11249	0.007837		9.15466	0.696871	2.17786	5.38393	3.05056	4.79089	0.643873	8.1279	10.1997	4.42148
0.138572	0.0524032	0.0796234	0.0436555	0.0185726	0.0240135		0.0102275	0.141527	0.135691		9.47866	5.7438	2.55059	9.07137	6.81622	8.91915	9.24172	1.22233	9.0424	1.68301
0.141276	0.0689697	0.0820572	0.0406824	0.034667	0.0737206		0.0598239	0.0121353	0.0623193		6.78859	7.64665	3.40872	5.90181	5.45043	6.51132	2.95362	2.62601	9.31462	2.66073
0.204276	0.130981	0.00891499	0.0562983	0.0934743	0.0337367		0.032849	0.258642	0.178757		4.28543	7.29456	3.70884	4.53144	7.08878	10.5197	11.8558	15.4404	11.0481	5.48424
0.0520919	0.0980038	0.144753	0.0457535	0.0787801	0.0425848		0.0147609	0.00800123	0.0836287		4.44465	6.03718	5.39681	5.0932	8.62925	7.83716	12.025	14.3569	10.494	7.5716
0.0338633	0.0203578	0.000942813	0.0240471	0.108918	0.0140287		0.0104064	0.0557911	0.403411		6.04564	6.03612	7.66363	2.80635	7.36907	6.19771	10.4804	12.1649	8.76095	20.2053
0.00653483	0.024487	0.0277215	0.0243666	0.0280665	0.0162948		0.00753997	0.117371	0.1442		7.26776	5.90032	7.8803	10.5097	2.05205	3.1644	7.48909	8.10483	8.47107	18.6854
0.0931181	0.040671	0.0644988	0.00824902	0.00776711	0.019842		0.0276967	0.229684	0.0550809		7.31313	6.79904	6.60487	11.47	6.09999	2.11077	2.26991	3.59274	7.73182	8.98407
0.0132041	0.024591	0.00960441	0.00817653	0.109133	0.0220857		0.0693055	0.0589471	0.101178		5.91435	6.83297	3.59808	8.1704	4.00188	4.8644	3.32406	2.35236	6.50005	7.70623
0.0840756	0.131232	0.0625892	0.144828	0.0727735	0.0305725		0.0162437	0.0843286	0.016038		4.18	6.02991	0.919663	6.12226	6.40529	5.93505	6.76174	5.14792	4.8685	18.576
0.185839	0.0323323	0.00147587	0.0238753	0.0333221	0.00816065		0.0113801	0.0741417	0.0223868		1.83698	4.89415	1.55314	6.02834	9.50876	3.65739	5.8287	5.74618	2.86535	20.6053
0.103569	0.026485	0.0483552	0.0182785	0.0236811	0.0044009		0.0127649	0.051306	0.0107624		2.27662	1.97171	3.81553	5.85875	9.21317	0.389388	7.55335	2.21085	0.717699	16.3477
0.109245	0.00881765	0.0466454	0.0355025	0.0222704	0.0121347			0.092445	0.146426		3.47311	6.44393	5.48161	4.1677	6.19146	2.21432	8.97151	4.2543	4.95563	23.7599
0.112406	0.113591	0.0100842	0.0028866	0.099713	0.0202507			0.141867	0.0117479		4.1551	7.89637	3.67061	0.981755	4.22467	2.56894	5.57012	7.52859	7.79534	25.1209
0.0581299	0.0465216	0.0394179	0.0357038	0.16861	0.0266056			0.100002	0.0690192		7.13541	5.09361	3.50788	1.78092	4.03324	3.28783	4.14824	7.11328	5.7913	9.37751
0.32961	0.217666	0.00937933	0.006615	0.0420787	0.0273035			0.0270756	0.123577		6.19425	5.12635	8.95314	7.06308	3.19695	4.45263	5.03383	4.16635	3.28232	5.10065
0.364212	0.0290816	0.0503646	0.0627133	0.0444586	0.000775997			0.0548623	0.056684		2.46889	7.10629	14.975	3.41185	10.1258	2.55215	5.69443	2.59881	2.86823	4.25192
0.033495	0.0597026	0.0285149	0.014311	0.114593	0.0390992			0.0149123	0.0486024		4.33446	9.79296	14.0526	10.6381	14.4508	2.6121	7.9006	5.45099	4.4346	20.397
0.0144537	0.0150371	0.00600115	0.0716506	0.052776	0.0258894			0.0427628	0.0473333		7.90028	13.3069	9.05632	14.5838	9.99358	5.81201	7.40309	8.06994	5.94133	23.3234
0.328598	0.152968	0.00079959	0.0449696	0.007627	0.0170412			0.0947624	0.0812922		10.6357	11.2156	0.924614	14.9227	8.16913	5.22215	3.58874	7.30291	7.23658	20.8685
0.089777	0.0408653	0.0385899	0.0279712	0.0508417	0.0206558			0.0722788	0.0809679		14.8629	4.60656	1.01916	9.04015	5.59537	1.50082	0.494985	6.19696	5.76586	16.7606
0.0498978	0.115967	0.0211754	0.126344	0.0320184	0.0229794			0.0633183	0.0284023		14.5622	2.895	5.28926	13.4474	2.26167	0.817851	0.718616	7.21536	3.87382	18.1329
0.109676	0.104526	0.0839334	0.070402	0.02274	0.0695687			0.113442	0.1401		9.26374	10.3121	4.07891	9.98266	4.90416	1.01377	2.98431	6.70865	5.76693	22.7625
0.0629701	0.0227735	0.0967582	0.0304431	0.0194187	0.00568383			0.167862	0.0430651		8.16568	5.40222	7.76258	15.415	8.60744	1.79268	5.09552	3.84378	11.8867	21.7482
0.0897321	0.0581659	0.0143167	0.132868	0.0549279	0.0104763			0.105723	0.414006		9.38475	1.77257	13.1317	7.03588	6.87755	3.65246	4.34656	4.04665	1.51391	4.85023
0.0152171	0.0375242	0.0689374	0.0773145	0.0447702	0.0111536			0.081183	0.00765714		7.81556	1.82969	11.1394	6.83871	6.25456	3.27167	4.02443	6.22461	1.5186	3.61143
0.0369015	0.0381862	0.0418754	0.0307899	0.0581548	0.0157969			0.0558516	0.0729887		5.29297	7.39501	5.72884	14.1518	8.26437	1.74841	7.99206	7.89299	3.64576	10.0407
0.0300178	0.00650678	0.0413076	0.0132549	0.0137691	0.0217704			0.111868	0.0124669		3.72702	9.41676	8.71889	9.97183	5.16749	5.81371	8.66861	8.55793	3.67384	17.65
0.0108293	0.151235	0.0289847	0.0321823	0.0613523	0.0475451			0.18076	0.50283		2.69548	4.15603	10.655	5.93649	4.0467	6.16149	6.97222	6.79406	2.76567	22.2008
0.225239	0.0265814	0.146301	0.125385	0.0742144	0.0411979			0.0651002	0.0485702		1.92427	7.23628	7.3532	11.5142	7.88085	3.91741	3.6891	4.75763	2.24677	23.1564
0.00410662	0.062065	0.0377468	0.0531505	0.0137459	0.181541			0.0218152	0.0114736		2.67762	9.16532	4.13239	9.27537	6.35123	0.855527	6.09827	5.67777	1.12069	24.0293
0.0498222	0.00531592	0.00378848	0.134265	0.0261466	0.0473061			0.13388	0.0450971		5.37186	9.26726	1.62748	1.00184	3.87273	2.01111	9.2919	5.49315	2.68516	24.3782
0.0299525	0.109189	0.0393139	0.0504147	0.149417	0.0317029			0.0938776	0.0250186		8.01262	10.9221	3.64383	3.73885	29.9118	4.0952	7.08865	5.77822	2.15648	21.9501
0.00206982	0.00879404	0.00599324	0.0073785	0.0452174	0.0216258			0.0784148	0.0579507		7.14027	7.92104	4.24454	3.17306	28.9605	6.11285	3.73554	5.4843	1.01687	15.9015
0.261537	0.223143	0.00918125	0.0303164	0.0129116	0.0423396			0.0831203	0.0721572		20.3178	4.54143	3.64201	6.92188	25.6823	4.22399	3.33236	7.22773	0.760042	10.1937
0.121858	0.178695	0.0897616	0.132597	0.0707763	0.0392539			0.139269	0.082207		16.8231	4.05004	3.26702	8.02054	17.0356	3.99199	2.84607	11.4103	0.519007	9.50258
0.10965	0.00289247	0.118426	0.0541009	0.0881295	0.0140588			0.162984	0.346617		12.9181	8.13906	6.5647	8.93405	8.58066	4.72589	2.73453	7.75708	5.12687	10.5194
0.104378	0.0151357	0.049591	0.0094748	0.0313596	0.0138725			0.0453471	0.0557699		15.4713	8.49965	4.60572	9.89331	9.2615	3.67949	4.33958	3.31902	9.34342	8.98734
0.0196048	0.0486694	0.0494599	0.0356085	0.0755367	0.0968464			0.0347339	0.176883		14.9011	9.2096	5.85849	8.53949	5.76741	3.52065	3.06644	3.32528	8.74551	7.3295
0.0628245	0.0244658	0.0232626	0.1039	0.0520126	0.00968954			0.105659	0.00711281		7.12772	6.31792	8.24891	5.0164	6.25067	2.7716	2.38505	4.95661	5.6947	9.84873
0.00886646	0.0110073	0.0456713	0.0357731	0.024101	0.145037			0.0779122	0.22483		2.11893	4.12063	7.96338	22.0815	5.42512	2.23283	4.04806	8.12148	5.64895	12.7703
0.168513	0.062424	0	0.0842741	0.00236858	0.0674316			0.045677	0.00615526		2.05803	1.81876	6.34523	14.2531	1.31921	3.11785	2.90288	9.22431	5.29934	12.4257
0.110535	0.0120236	0.0192534	0.0249337	0.0287337	0.0574679			0.00457767	0.215363		7.00429	6.30667	7.76351	6.57714	2.63511	1.94239	3.62935	4.46471	5.72076	4.86397
0.151408	0.0780345	0.00603041	0.15627	0.0121641	0.0142751			0.105921	0.191627		10.0895	4.74302	7.96058	2.94368	7.31572	0.766012	8.66189	3.50488	2.78436	10.3478
0.416046	0.0109902	0.042833	0.105785	0.0119194	0.0309453			0.0692454	0.100326		8.84114	4.38922	4.38862	10.9593	10.0501	2.31483	7.48132	7.11144	2.09592	19.3316
0.0544396	0.0174645	0.0321037	0.197587	0.0544739	0.17294			0.0140137	0.0580688		4.1815	2.93477	4.76836	5.53854	7.00945	2.08006	5.83967	11.2028	4.65643	19.1569
0.0372857	0.0375578	0.00674023	0.0335245	0.0323178	0.0835825			0.129647	0.0119292		2.88089	2.17301	0.409612	6.98728	4.68493	2.40237	8.6953	11.28	3.64913	16.7523
0.00600726	0.0636046	0.0240395	0.0265024	0.0149796	0.010576			0.0552003	0.0522821		9.03408	5.04049	4.40831	3.56101	5.79664	1.75212	15.0176	11.1847	2.3874	15.1771
0.167767	0.113761	0.0188656	0.019948	0.0351463	0.128312			0.132128	0.0984829		8.80159	3.27122	1.89261	3.12233	6.24772	0.855341	6.13512	5.03363	3.01708	13.1803
0.0540609	0.0191695	0.0169486	0.0261988	0.026417	0.031241			0.0459901	0.382811		5.239	4.31007	4.62063	3.71885	8.33093	8.78471	12.5598	12.0574	5.3414	12.1849
0.164766	0.11923	0.0644835	0.0648704	0.0451908	0.191729			0.0252302	0.0924144		13.344	6.50878	5.49903	5.98888	9.65614	6.33141	2.61695	9.28342	7.41446	13.5695
0.411066	0.0166194	0.00120934	0.0586833	0.0315669	0.0170972			0.036262	0.0059395		5.15435	8.22996	3.44626	7.40496	14.5286	4.93054	3.70293	9.24952	9.13063	14.7338
0.081045	0.105901	0.00405501	0.00158834	0.0880855	0.0496799			0.151225	0.479203		5.14451	6.08002	1.77502	4.00105	3.75333	1.55155	10.6984	9.18505	12.8613	11.8448
0.053631	0.141177	0.0118961	0.0223695	0.0211958	0.0296954			0.247908	0.216489		9.32696	5.43043	1.42235	6.94897	2.9901	1.76496	3.67513	9.11264	12.891	3.82206
0.0674069	0.183303	0.00423786	0.0252453	0.0148751	0.0530161			0.0664488	0.116585		5.90603	9.29399	2.00401	7.73727	2.96597	12.0868	7.91512	8.91156	9.92869	6.211
0.0265688	0.199164	0.00132492	0.0501226	0.016764	0.0451245			0.031752	0.127012		2.55326	2.41228	6.0804	7.80899	7.45255	14.1419	4.57879	6.76902	8.77377	12.6015
0.0100642	0.194015	0.0279926	0.0254922	0.0430784	0.0144959			0.062785	0.0229994		7.78193	11.0799	7.25811	7.58028	7.7337	9.0424	5.32702	8.75082	8.40841	5.64673
0.0775818	0.221847	0.00720258	0.0908421	0.0233385	0.051417			0.0813706	0.0848953		13.4631	14.7233	5.02726	4.87619	1.25204	7.34579	6.84304	10.1781	5.68095	0.918067
0.0739628	0.00764342	0.00152075	0.0156044	0.0430079	0.075364			0.0982398	0.0441015		13.2691	9.82243	3.52529	1.89594	3.37901	5.60232	9.08224	8.06464	6.87227	3.98657
0.0595604	0.0322078	0.0249449	0.0221617	0.0213426	0.0220919			0.0225989	0.0897943		10.8794	2.68373	3.0227	0.694737	2.65139	3.8742	6.39299	6.99441	7.70921	8.07976
0.0586782	0.134908	0.00285971	0.0447447	0.0249274	0.0753213			0.0141969	0.115032		7.32071	3.7568	4.2703	0.784009	1.79328	10.4255	2.44573	9.10723	6.64852	10.2609
0.13244	0.156741	0.00568184	0.00864231	0.0340328	0.0175192			0.00241438	0.00323529		3.33161	6.68823	6.61126	0.902627	1.95495	7.87444	2.94776	9.52667	7.10201	1.83646
0.17756	0.0378724	0.00516429	0.0711951	0.143051	0.0623766			0.281746	0.0657075		7.52669	11.4028	9.10892	1.49848	2.90317	10.5987	9.40393	1.97787	9.11325	3.03159
0.140159	0.0725268	0.00026653	0.204314	0.00969985	0.107544			0.111102	0.148891		10.043	13.8721	8.13756	3.44859	3.7073	1.91395	3.38187	5.96552	8.9145	3.58299
0.140139	0.15601	0.00026653	0.0694847	0.00350417	0.0196322			0.121789	0.121532		8.3664	11.493	6.04801	3.97955	3.36814	4.59254	3.17833	11.018	9.05327	3.18039
0.00302689	0.00396167	0.00561233	0.111844	0.0152064	0.0989571			0.0511698	0.0135802		6.92948	8.07507	4.02457	1.33325	1.198	5.27555	3.80953	13.7689	8.98445	0.922461
0.00273009	0.0162591	0.00844744	0.00975905	0.0266086	0.0191478			0.0732649	0.0621417		10.2823	6.35866	1.2438	2.73363	2.74938	7.8648	12.4844	10.9259	7.79357	8.72173
0.0833009	0.0170746	0.0290444	0.0778751	0.0616199	0.103385			0.147715	0.0581045		10.6607	3.6492	3.35442	5.86157	0.251703	8.2601	16.6968	6.49289	7.9442	14.8943
0.0426135	0.0437178	0.083043	0.108569	0.140193	0.0254685			0.220311	0.0594371		3.00908	2.81583	6.75075	6.77438	8.01518	4.78299	11.7489	4.12029	8.34534	14.6621
0.0135907	0.0192362	0.00667407	0.0479778	0.0436006	0.0137467			0.111989	0.0321061		6.89604	3.63975	6.50272	3.93576	13.0285	5.85894	10.1238	2.59138	8.81636	23.8962
0.00293087	0.174814	0.06213	0.0992582	0.211207	0.0842746			0.0394357	0.00765562		10.4415	1.39449	1.89804	3.15232	11.5121	7.44991	5.54953	2.50311	8.81564	26.8342
0.168233	0.0114202	0.00423151	0.0206209	0.152194	0.0292588			0.0420425	0.0735306		13.3496	7.15796	4.45377	2.77837	5.19233	3.88117	2.513	4.19709	6.82088	22.8066
0.00500008	0.156543	0.017465	0.0534611	0.0188248	0.110249			0.0241327	0.0736078		14.8465	10.1212	3.22075	1.6699	1.43229	0.763269	20.7925	5.56679	16.0231	13.6503
0.00405501	0.0208777	0.129334	0.044338	0.0946731	0.0210295			0.0559964	0.00962474		8.3133	8.1126	2.62247	5.52558	4.85619	4.40308	7.27393	3.77366	14.1895	9.53221
0.1486	0.0234472	0.0407682	0.0332057	0.064859	0.105927			0.234428	0.205689		11.1664	4.37764	6.41165	5.7215	7.43952	5.46483	12.6135	3.16528	8.48652	11.5477
0.320651	0.0116062	0.117019	0.0114334	0.0620236	0.0701982			0.24368	0.14899		15.9656	7.26799	5.74224	4.71088	13.6934	2.81465	5.23099	6.06668	8.16031	15.4683
0.225471	0.161401	0.0367275	0.00421275	0.025462	0.0429033			0.142715	0.00809092		11.7083	6.86729	3.96539	4.2321	16.436	3.1968	4.97054	18.2149	9.30187	16.8413
0.0318511	0.0132019	0.0479523	0.0268582	0.0546536	0.00925862			0.133633	0.0419991		6.45905	4.54285	3.59335	1.17397	9.72881	3.84025	2.10206	8.05447	6.90015	17.8168
0.0350302	0.0330619	0.00554711	0.0441147	0.11411	0.0528611			0.00715191	0.0228353		2.88095	0.893213	2.72398	5.05969	5.01716	7.29688	0.63767	2.5205	3.47176	17.134
0.0226247	0.00466969	0.0926016	0.150546	0.0115341	0.112853			0.198587	0.00839429		1.79037	1.68862	6.45601	2.84284	12.6784	12.5406	1.16693	0.918147	1.46945	17.7781
0.149785	0.230288	0.081279	0.214925	0.0398519	0.0251932			0.0538847	0.21777		17.1779	1.7731	7.81786	5.87605	14.1205	14.4858	3.3366	1.77871	1.69114	19.4009
0.0225718	0.19242	0.00147587	0.0193645	0.175939	0.0308408			0.138842	0.112506		14.7982	2.17185	6.64364	7.73139	3.50937	8.41118	5.84617	4.28947	10.4219	22.5355
0.0964778	0.003167	0.01178	0.0196616	0.0438232	0.0431861			0.0861825	0.0747724		9.95065	1.12286	5.66191	3.82915	1.04564	1.39289	5.28383	3.50531	14.0475	25.6502
0.0236218	0.0706277	0.00538204	0.0679048	0.342155	0.0100845			0.0692356	0.0451923		3.79537	2.38049	5.56931	3.36587	6.77626	4.18119	3.10549	2.47636	16.0644	25.5777
0.021134	0.0184415	0.0876397	0.0245114	0.165037	0.0624438			0.11072	0.0223849		2.27709	3.6597	4.01425	3.19877	9.59026	5.62568	1.18975	2.64151	14.1779	20.46
0.0803606	0.127854	0.0638749	0.00925346	0.0465244	0.0110503			0.0224723	0.046707		3.99122	4.66658	5.5525	2.822	8.2325	6.59935	2.2808	3.24464	7.88252	12.7046
0.00026653	0.0108576	0.0286695	0.0194989	0.167954	0.139053			0.0572575	0.0766017		14.1244	3.59951	11.2014	3.3886	6.47051	5.81558	1.90577	2.32976	6.83184	8.7229
0.206962	0.00181615	0.00985015	0.1367	0.21467	0.0175759			0.0778899	0.0297893		8.24535	2.68353	9.17305	5.35631	7.87224	4.51747	1.08813	10.1033	4.56132	9.42371
0.0229349	0.0286068	0.0564889	0.0210854	0.00862198	0.0370734			0.0602362	0.0618366		4.83388	2.23941	2.97035	5.1225	3.43965	9.98488	0.503352	1.6555	5.50556	9.0055
0.0950806	0.112391	0.0827748	0.0632439	0.266266	0.0126654			0.0580767	0.0199509		6.65435	3.23258	0.878833	2.11971	13.9698	5.34623	2.01135	6.19024	4.21328	6.88048
0.0926793	0.0474298	0.0779229	0.0915213	0.0593452	0.101706			0.200864	0.0266236		7.88736	8.22607	0.713149	0.669891	20.1861	1.31896	2.96061	9.18277	2.87817	6.07797
0.342179	0.128988	0.0112774	0.0367379	0.0631243	0.0432897			0.144687	0.11067		6.02196	10.5191	0.862649	1.56875	26.1554	6.15746	1.98067	4.03359	0.616817	5.63419
0.0898252	0.00596614	0.115791	0.00871886	0.00887694	0.093265			0.0677897			13.2972	8.77687	4.21366	1.71441	21.5151	5.36286	0.359271	6.34306	1.73153	5.43536
0.255524	0.0284629	0.0918491	0.0288416	0.0805191	0.00293521			0.0474236			15.5483	6.31561	5.65798	2.82891	13.3474	5.98042	2.29743	15.9185	2.80657	8.50537
0.0329237	0.037854	0.0307258	0.124788	0.106055	0.0085565			0.0902479			16.8268	7.25519	2.30792	2.29084	16.1114	3.78775	2.80412	19.4415	7.70371	2.03076
0.176388	0.00662465	0.15466	0.00528941	0.0407909	0.0413221			0.0747954			17.6709	7.68861	5.88263	1.21739	18.0359	1.45979	2.67391	18.8509	15.9512	8.5928
0.367266	0.0464202	0.0209905	0.0536321	0.0229474	0.0190944			0.0681001			3.29704	7.24896	2.29006	4.88811	14.2482	2.61675	3.02735	3.88258	24.1931	14.9578
0.0594759	0.0409554	0.0485864	0.0097662	0.062301	0.0387388			0.0433592			8.41898	8.31468	4.89666	4.52892	8.52308	2.85096	2.65077	5.15369	28.03	21.5571
0.0180016	0.0222632	0.0333414	0.0693387	0.0319822	0.0969287			0.111288			11.3861	2.42591	11.1757	2.1078	4.71531	2.71549	3.83847	2.16577	22.3848	25.7337
0.0578417	0.0556052	0.0110635	0.096599	0.0877119	0.0142928			0.163712			6.84	0.881335	3.45132	5.68688	7.01904	0.710302	7.08557	2.16016	11.9317	24.3497
0.0736838	0.11813	0.0380567	0.104028	0.130266	0.0457085			0.245603			6.51573	1.23207	3.24131	8.33077	6.80381	4.17035	7.47312	0.925534	7.2964	16.7689
0.228005	0.147684	0.038573	0.0970348	0.0347609	0.0138792			0.0283822			8.5017	3.32906	7.82248	8.58791	2.53675	3.89399	5.93559	7.84826	10.1517	5.44707
0.110962	0.035139	0.0751143	0.0335123	0.0430016	0.0310471			0.0209662			13.7989	1.11833	6.98096	7.11347	6.45605	6.68409	3.91156	10.1519	14.3832	7.83066
0.0269693	0.208641	0.132884	0.16432	0.0677554	0.124074			0.0426043			13.5704	5.69531	7.55775	2.60006	6.71456	4.91291	3.54355	5.54428	12.8023	15.6142
0.0693362	0.0865133	0.06991	0.0539303	0.0465287	0.0062509			0.0640099			7.77401	8.11582	11.9595	2.30951	3.53281	1.64173	5.03733	0.79	9.0695	15.9193
0.0256719	0.164705	0.0757599	0.071234	0.0168446	0.0495572			0.119527			11.9729	3.98193	11.2574	4.1992	2.27402	3.67819	4.61367	4.86871	6.68275	13.0893
0.0999697	0.151844	0.159738	0.33532	0.184136	0.0340456			0.22983			10.7653	3.07682	8.33521	5.52812	3.90493	4.9489	1.78107	9.98823	13.3742	11.1075
0.0535204	0.40691	0.0405714	0.0739705	0.0381737	0.0270143			0.0812844			7.55587	8.9938	2.43583	4.16529	1.78748	4.16579	1.80972	8.49775	20.3296	13.4002
0.0509654	0.0451459	0.0386617	0.00787992	0.0400779	0.106378			0.0948458			7.02613	11.3566	3.56947	2.23156	1.84907	3.74791	3.29927	9.53591	21.0723	16.5393
0.0879574	0.107641	0.0200151	0.0828858	0.0123909	0.0191155			0.0802009			0.161569	12.092	6.10903	4.12325	4.24438	2.65579	3.10424	8.66752	15.4488	7.44917
0.0107081	0.0648196	0.0665986	0.14366	0.237119	0.0301038			0.0512645			3.69352	3.10938	5.65564	12.4186	1.51204	3.94841	2.03468	6.91602	7.48155	4.46914
0.0292533	0.0139872	0.0334942	0.0334894	0.0492668	0.00473166			0.0823462			10.6356	5.09705	2.03068	3.70563	2.64907	3.11644	4.9473	6.39625	2.69757	4.00435
0.0232069	0.0873178	0.0615477	0.03106	0.0639514	0.00360822			0.0709231			17.7646	2.45765	3.10178	4.56132	8.30758	1.54534	6.14333	5.81644	3.43976	10.1415
0.0979306	0.0658974	0.221666	0.0186563	0.148308	0.0549576			0.149414			19.6407	11.759	1.90644	7.74539	7.16283	4.80185	3.82079	5.0387	5.64547	11.3783
0.118475	0.0592517	0.0702878	0.158995	0.0458846	0.131647			0.184793			13.138	11.7836	1.46542	8.89532	2.26021	3.54703	1.53998	5.50054	6.57244	8.85285
0.0761348	0.269648	0.18135	0.00935926	0.00622349	0.0177349			0.0605319			5.32326	2.19732	5.4154	6.76464	4.13123	2.40953	3.48471	5.95073	7.399	10.152
0.0243074	0.070907	0.0582345	0.0693939	0.139049	0.0690752			0.215641			3.9746	5.36307	3.55416	2.90825	4.10306	4.45467	4.97591	4.66747	7.84749	10.5705
0.0724986	0.027456	0.0196471	0.0180672	0.0537975	0.0529873			0.0136268			2.45111	5.5441	4.66678	3.95537	2.97545	1.99771	4.15649	1.85051	6.15362	6.69084
0.0107191	0.405542	0.068729	0.184734	0.0150937	0.0263846			0.416477			4.07451	6.71717	7.28289	3.96873	3.25942	1.94884	2.75091	0.791591	4.51297	5.07303
0.127014	0.101863	0.0153265	0.0304833	0.126387	0.0186845			0.142725			7.73505	14.0899	5.59279	7.12128	5.04921	5.04014	2.61314	1.86302	3.79238	2.34017
0.146706	0.0355206	0.046071	0.040664	0.052907	0.00994715			0.0213432			6.76826	14.9573	2.5755	5.187	6.17185	6.34851	5.15558	3.2841	3.0676	2.68728
0.0626888	0.0169321	0.150884	0.0187462	0.0456822	0.0180547			0.0382408			7.49136	7.60468	1.39303	2.00803	7.91757	2.92866	5.21126	2.35075	2.42948	3.7622
0.0791275	0.0398758	0.32447	0.0246186	0.0127081	0.0130965			0.121845			14.3783	4.83351	2.89456	1.60963	5.24959	0.790998	3.86427	0.217526	2.96503	5.37392
0.063191	0.0693728	0.0426518	0.00612644	0.00905734	0.0285606			0.0266695			22.8089	7.41612	5.04714	2.65627	3.90789	2.24819	0.891183	2.22792	3.86233	4.38904
0.0234055	0.0743552	0.0150191	0.0161973	0.00887102	0.0325692			0.120417			27.0457	8.96516	5.56916	2.24737	4.3208	5.10832	2.9249	2.79474	3.34068	23.4203
0.248014	0.0359255	0.0102109	0.274371	0.0534332	0.0176132			0.149161			23.5614	19.5851	1.82088	1.97116	1.33373	8.01588	3.12478	3.26923	1.83994	18.7118
0.0903109	0.108707	0.0492788	0.0205684	0.0231183	0.0319276			0.0245624			18.1416	1.79388	8.44573	2.27149	1.20382	6.82039	0.698844	4.39987	0.872588	16.787
0.0402779	0.0431532	0.00671478	0.0681768	0.0260769	0.00983636			0.0556699			17.0068	2.55417	6.49364	0.27701	4.73832	4.79317	3.06976	4.51657	1.23386	17.7043
0.311913	0.0221911	0.0628541	0.14545	0.0259158	0.0670164			0.065538			10.132	4.15756	2.29543	3.72879	3.03028	2.67599	2.85604	3.78408	1.24185	18.3018
0.100965	0.0127387	0.0841094	0.0168375	0.0506131	0.0286756			0.0187166			20.5171	4.60106	1.13839	4.68302	3.33183	2.32341	13.64	5.44254	1.91863	17.1569
0.0217089	0.104132	0.0651818	0.00213087	0.00772344	0.020015			0.073412			27.8113	4.70033	3.61868	2.69788	3.90429	3.7986	16.4867	6.73918	2.34076	12.4089
0.018584	0.0729828	0.0115057	0.00896839	0.00587375	0.0289419			0.0385578			24.5145	7.52724	3.5998	1.80959	17.2403	4.68118	10.7783	5.95678	0.832731	5.86347
0.156663	0.052638	0.0264196	0.0545489	0.00286077	0.0730255			0.0514118			13.8547	9.36392	2.3686	1.6429	9.25891	3.91479	11.5935	3.98653	5.81181	26.1049
0.461518	0.0746599	0.049821	0.0660137	0.0176897	0.0239652			0.0034331			5.7243	6.41577	1.14781	2.24943	7.68536	1.80028	19.2796	4.81907	7.35822	25.4036
0.0831805	0.0675911	0.0660724	0.0339384	0.0411399	0.0305417			0.118142			8.821	1.35511	1.98492	5.94651	4.17415	3.91932	16.368	5.90568	8.02804	21.5274
0.0271068	0.0229737	0.0390104	0.00991648	0.0125201	0.212946			0.108742			8.17292	2.62618	3.67264	6.54863	3.62883	4.83389	8.34071	4.9617	5.25463	18.7365
0.0900474	0.0144777	0.0433234	0.0407004	0.0207884	0.126866			0.0296277			5.60189	4.34909	3.94414	3.20915	8.58855	3.52386	3.00057	5.84633	4.39991	16.9238
0.118226	0.243945	0.175631	0.142978	0.141785	0.0263802			0.147809			1.19836	4.28008	2.61549	2.99475	14.801	2.28122	4.08846	7.72575	5.12214	6.56431
0.0100653	0.016411	0.0159472	0.0123305	0.0805855	0.0268271			0.0530928			1.97536	9.14822	2.27976	3.35948	14.5362	5.74613	2.92517	8.02171	5.93436	7.73765
0.0161222	0.00766924	0.105608	0.0118946	0.0264358	0.0220776			0.0323779			3.35275	10.169	4.52996	3.15598	4.17527	1.43413	4.7575	7.68526	5.08347	0.403455
0.186638	0.253667	0.0457542	0.0812317	0.0233636	0.071244			0.0382775			8.95989	7.86969	4.16574	3.65904	3.13803	2.38509	9.68975	6.1697	2.93069	5.80305
0.123059	0.0841188	0.182037	0.0505235	0.0258536	0.0557024			0.111962			17.8995	4.84209	4.53397	4.99185	6.80571	2.59696	12.4935	3.99549	1.12777	5.11446
0.039974	0.234968	0.128891	0.0231647	0.0114534	0.117914			0.0417496			25.5903	0.628017	2.44259	3.49913	12.0287	3.2544	11.4913	4.53551	1.24295	4.43336
0.0297548	0.111901	0.00521672	0.111956	0.0270911	0.0979629			0.0271056			28.3862	2.20452	1.76146	2.56297	10.5682	2.2261	5.41143	8.50361	3.54572	9.9276
0.0593802	0.252211	0.0440628	0.157114	0.106109	0.0919894			0.0862983			24.9271	4.86997	4.48424	3.33813	11.9232	1.93948	2.96276	10.0375	5.37105	15.9984
0.0233439	0.164671	0.029045	0.0241039	0.0305981	0.0637728			0.420572			18.7223	3.20477	3.21403	2.51878	6.03012	3.44466	8.41176	4.49764	6.1935	13.9166
0.0132234	0.178518	0.00474513	0.00543041	0.0251721	0.0504444			0.257204			13.5867	3.04185	2.53612	2.15039	6.74482	5.62567	8.89015	5.57359	7.61438	7.61853
0.049724	0.166694	0.0385733	0.0760066	0.0373004	0.0788101			0.0320752			8.72866	6.49812	3.21524	2.31101	7.80109	4.44238	5.65348	9.33429	7.95458	2.66037
0.00374849	0.0598974	0.0505376	0.0296192	0.0170925	0.0368392			0.0396314			6.41312	5.95057	2.2963	4.55799	6.61393	1.76416	2.8627	6.19483	6.57363	5.33118
0.00815662	0.0114714	0.142049	0.0605124	0.0871591	0.0717492			0.147613			7.65327	3.45134	1.20891	5.2055	8.54338	1.23517	2.06564	0.930653	5.13771	9.90883
0.0216501	0.042036	0.0193901	0.00974039	0.0321536	0.0679041			0.0211675			20.2924	8.54506	2.19317	5.53233	2.3672	4.07239	4.29648	4.10606	4.43851	10.1109
0.0597451	0.060428	0.0105773	0.0186871	0.0441893	0.0536347			0.0759319			15.8537	8.37458	7.0178	4.36673	4.03055	6.10767	5.4445	6.93891	3.19633	7.72452
0.0902958	0.0326544	0.0929172	0.0698068	0.0314741	0.0199689			0.0802133			9.02398	5.05576	10.6847	3.07951	7.59484	3.99518	2.57379	7.64936	2.46266	13.4085
0.0572385	0.0577672	0.0448776	0.0946971	0.105754	0.0462711			0.104509			5.49856	1.36046	8.98198	5.04095	12.3056	4.25231	1.4911	7.11461	2.50004	20.6308
0.107331	0.0535248	0.108546	0.0473367	0.0220378	0.0554882			0.0387253			7.42468	2.5527	4.76593	5.68737	12.4747	6.12297	2.16545	5.51166	4.20664	23.9495
0.0371295	0.282044	0.00694515	0.0740792	0.0502863	0.0380589			0.0214131			10.2093	4.65262	0.275857	5.4057	5.30964	5.5399	0.88663	5.07143	6.80528	22.1297
0.0130897	0.0355937	0.060153	0.0307081	0.107791	0.0760547			0.0484505			8.24758	7.19337	3.53888	2.54631	4.36395	5.93739	1.88652	5.52032	7.56404	22.6899
0.108123	0.0201262	0.00990453	0.0253506	0.0572776	0.120518			0.04871			2.05244	8.5656	0.811254	2.89055	3.5337	5.58849	1.03871	3.57537	5.87054	11.4661
0.263729	0.0473012	0.0252448	0.241769	0.0187056	0.0734245			0.0301457			4.70117	6.08552	0.803287	4.80372	6.32434	3.85854	9.0179	5.11371	3.33862	2.92679
0.0104207	0.0518748	0.0103965	0.0653158	0.00785046	0.0521694			0.0107964			5.69148	9.11357	1.99141	6.63956	10.1871	3.71689	9.21806	7.41703	1.47201	8.5543
0.179112	0.0368846	0.0322009	0.00175503	0.0177105	0.0913116			0.0324084			6.41859	11.3583	4.35801	5.41726	11.8646	1.44143	5.89055	4.42208	0.537368	11.2178
0.0302812	0.0258766	0.0232214	0.0131806	0.00663041	0.105466			0.0969129			14.0483	7.99347	7.93581	2.80915	9.42293	1.84047	2.80607	4.16064	3.94855	9.5146
0.146765	0.230026	0.0275555	0.209535	0.0851246	0.0389777			0.017691			15.399	9.07451	10.1598	4.13402	3.20761	2.44041	2.55808	9.44335	6.9661	7.74064
0.164057	0.0614613	0.0149772	0.0695428	0.0468427	0.0158555			0.0152113			8.21896	8.72838	6.03328	4.82651	3.08145	4.9497	6.99907	13.0333	8.97138	8.10213
0.0267907	0.116827	0.00471536	0.099002	0.045745				0.0245141			3.2277	3.78322	3.70456	5.43848	3.54552	7.0308	7.75916	11.326	8.76814	13.8385
0.112819	0.0725348	0.0465087	0.0508208	0.0684529				0.234079			12.2751	2.74857	10.1909	4.56472	8.04435	6.68149	2.80103	4.79094	6.89485	14.7006
0.0174988	0.0426727	0.255299	0.0218985	0.0391126				0.0294972			14.8402	2.02119	5.84366	3.78933	2.90189	5.09787	6.9281	2.10699	4.9268	7.29655
0.0778391	0.276254	0.058529	0.0697962	0.0583982				0.0413533			12.5236	2.78384	3.29415	3.50308	0.198323	3.60645	11.3151	1.42126	3.48338	4.43383
0.142048	0.051174	0.258146	0.0456094	0.0442244				0.232459			8.69267	3.48477	3.68331	5.32605	6.42585	9.44962	12.6199	7.69585	5.10484	6.51128
0.051816	0.277979	0.0514014	0.00929843	0.0825184				0.0679368			6.88642	5.72726	6.54219	7.07037	9.11481	3.01077	3.10337	13.3139	6.70531	6.95091
0.12368	0.0372435	0.0443918	0.0148697	0.0180334				0.188549			6.7895	10.5755	5.53953	6.09397	5.74238	0.980343	3.72365	8.73466	4.4343	10.7764
0.0562309	0.0239529	0.0620834	0.0559626	0.0231851				0.0184706			8.00893	4.21843	6.35275	3.05549	4.94982	5.69908	0.761005	10.0651	1.27508	11.0636
0.113841	0.0741769	0.00714167	0.0723832	0.0404755				0.191302			5.78637	3.38661	15.0539	1.80606	6.49062	2.21803	7.60177	5.14116	0.952155	8.86043
0.0232308	0.0546103	0.156706	0.0291142	0.0959091				0.0612505			4.01246	2.34373	8.50773	1.07887	15.1865	3.49211	6.12403	0.9527	2.37408	7.03699
0.39531	0.0690169	0.0935557	0.015526	0.0294579				0.0649574			5.33645	2.14279	6.35943	3.96184	14.0817	4.56224	10.3031	4.02202	2.22597	3.84122
0.0185134	0.0449742	0.0897909	0.0504712	0.0922642				0.0166862			10.7858	2.55538	2.50286	3.75128	8.16798	2.06672	8.97222	8.33074	3.62414	4.2031
0.0138838	0.029627	0.0809529	0.0338401	0.0486595				0.169368			12.6915	4.08252	1.11894	2.60291	7.08541	3.40272	8.69775	10.5955	7.13625	3.08886
0.125748	0.0214125	0.117071	0.0331624	0.0482291				0.137048			8.02557	4.58433	1.29306	3.7515	7.95694	1.88214	10.1162	11.4491	11.4131	13.2828
0.183275	0.018456	0.0442215	0.0585014	0.0372387				0.285279			9.5384	1.51941	2.11325	3.47868	7.32927	1.62893	6.71119	9.59072	17.0726	25.9155
0.0673975	0.0382595	0.010166	0.146628	0.0910326				0.0232775			8.07378	3.4001	4.76789	5.11934	2.48729	1.86492	8.10909	5.83541	8.09962	29.1693
0.0446289	0.0722728	0.14944	0.0980258	0.0173854				0.175462			6.0083	5.47208	4.64729	4.56801	0.610179	1.87291	11.6437	3.65367	6.98279	25.2178
0.0516465	0.0465311	0.0807798	0.00697098	0.0330097				0.132965			4.48921	3.61803	2.99871	7.09027	9.29208	4.27253	10.0643	20.7579	4.1784	20.6931
0.0988735	0.0580131	0.0910974	0.0153548	0.00980882				0.0915596			13.6855	0.971872	1.92148	7.34585	7.54626	7.59704	6.18698	12.5593	2.63645	16.5023
0.299004	0.0909927	0.0443238	0.0292549					0.102566			16.1756	2.33749	0.725144	5.23986	4.77158	7.13625	10.0232	2.29029	2.65475	18.2204
0.0287458	0.0748163	0.0896625	0.0329804					0.0446704			15.5816	2.97178	1.5657	1.23902	4.92763	4.55341	5.7913	4.42546	2.06871	12.7142
0.045309	0.176097	0.0697779	0.0146653					0.215875			16.1269	0.647377	1.70013	4.85695	4.14991	2.41535	0.559304	6.21151	6.54116	13.976
0.0264398	0.0066205	0.021252	0.00736488					0.0867527			9.95644	0.89497	2.00862	3.88847	4.86931	0.63547	1.5639	10.3621	9.42612	2.69615
0.0275161	0.0469715	0.017147	0.229723					0.0553986			5.50563	0.770983	4.42651	3.117	6.22939	7.19889	2.93642	9.17466	9.23048	2.63908
0.0454764	0.052198	0.0310415	0.0111461					0.328093			1.79506	3.66392	5.02658	10.4061	2.85615	10.5282	5.48191	6.43611	6.89156	3.71257
0.0573463	0.0686369	0.0313815	0.0498954					0.036534			1.06689	5.08281	3.32183	12.347	2.24133	4.43812	6.20537	2.60716	4.48943	7.24819
0.0264601	0.0227158	0.0313132	0.0937571					0.166955			3.66307	2.81759	3.33778	6.96658	5.97772	10.8587	3.98033	6.54345	3.66645	12.2014
0.0132668	0.00829514	0.0132547	0.00899252					0.0391317			7.78799	3.57886	4.43719	0.270104	5.51464	7.58686	8.88476	9.03278	4.39124	17.0961
0.04451	0.0613208	0.00898972	0.022943					0.0233745			4.88008	6.87179	3.53617	3.68256	1.26563	7.43401	10.8115	9.69889	5.42262	17.537
0.13466	0.00791151	0.109703	0.107608					0.0644536			10.1774	3.39968	2.53304	6.36667	4.79916	2.49379	7.32795	9.63567	5.63957	18.8402
0.0184916	0.032474	0.0155511	0.0755221					0.113676			8.87756	10.4717	1.87803	7.00997	0.71989	5.17352	3.89685	3.65854	3.37284	20.8205
0.0846988	0.00877465	0.0541946	0.0256877					0.111081			7.66887	13.6324	1.32375	5.3248	6.62861	6.28971	1.04115	5.38566	3.05192	19.1381
0.0987275	0.0179998	0.139243	0.0512978					0.0952733			6.18521	4.68972	1.28343	4.45482	8.99574	4.35901	7.5311	8.07848	6.18415	15.2098
0.249359	0.12056	0.106724	0.099885					0.148272			3.11287	6.67133	0.373531	3.52454	5.53312	1.32316	12.9532	5.77297	6.71246	12.3297
0.157775	0.00897992	0.131586	0.0138456					0.31971			1.03449	6.93322	2.41701	2.01142	7.9562	1.79908	10.0668	3.69992	5.10565	12.577
0.0181853	0.27723	0.0937798	0.030779					0.0973446			3.63619	9.04524	3.59825	0.594957	6.00839	3.98311	4.80063	12.052	3.72087	11.5
0.0216557	0.0135862	0.0394515	0.0507676					0.059396			8.12979	8.12853	3.10684	3.96968	2.50048	6.79758	14.5487	11.1235	3.18323	5.10834
0.302592	0.0557024	0.0343477	0.0186584					0.0207457			9.52901	10.9591	1.82419	6.2829	6.43804	6.45444	7.20821	5.6467	5.73514	7.22336
0.0219216	0.109576	0.0408543	0.0223076					0.0148152			3.62871	8.2099	0.456742	3.43456	7.32405	5.42452	11.3474	4.57702	8.64973	8.51551
0.0996254	0.00413115	0.0243443	0.117843					0.0109016			4.31653	1.85721	1.42296	2.24221	4.59048	2.534	6.84973	2.1661	8.93544	12.3956
0.0952092	0.0112177	0.0244322	0.0597741					0.046737			5.42405	5.4256	4.68117	2.61452	3.51859	3.18668	5.54104	4.07584	6.03443	14.5975
0.0536411	0.0322842	0.00795083	0.176332					0.00684101			2.04064	7.78958	6.93011	4.93658	1.87537	6.3659	6.12036	7.40151	1.26967	13.1476
0.114389	0.0598848	0.00861323	0.0919106					0.0836134			0.891352	5.39449	5.86281	5.20275	0.668095	11.3959	10.0404	8.72338	4.53721	9.56809
0.0243496	0.056456	0.0211913	0.0228932					0.00881692			1.77591	1.24515	4.84197	8.71892	1.10558	11.2944	6.08891	9.12522	8.45072	8.88263
0.049139	0.0485963	0.0336258	0.0325607					0.04435			3.56297	4.23194	4.40921	12.4771	6.19256	5.95077	4.0038	10.8075	6.96428	13.147
0.168982	0.0993984	0.107134	0.178637					0.0375555			4.14959	4.73856	2.65757	13.2695	6.19831	2.51771	11.7401	11.1847	4.13101	17.0816
0.220062	0.0536371	0.0870689	0.0407181					0.0839704			8.47313	2.59031	2.06852	20.5447	2.38747	12.9122	10.4634	9.05281	4.29912	14.2482
0.0453378	0.0299723	0.0361085	0.167177					0.0162297			16.3443	7.20008	2.64231	23.369	2.42883	12.0946	8.93757	6.10358	5.79985	10.2705
0.016201	0.0793245	0.0834421	0.0584386					0.0118345			20.9957	11.7896	3.12039	14.2282	9.34121	3.39448	8.98706	6.89772	5.64468	12.8483
0.0948808	0.13911	0.0142328	0.0320097					0.230184			17.9758	9.10372	4.39144	2.8843	12.1869	5.59051	7.589	14.8684	1.55872	18.0171
0.136855	0.0262219	0.00703458	0.0578707					0.0299665			10.2425	7.74023	4.41057	1.31269	11.071	3.69035	0.607136	15.1218	3.61222	19.4251
0.0534966	0.040192	0.0889516	0.0474262					0.0734798			3.8212	7.93099	2.25331	1.40401	3.4523	8.58608	0.883742	6.18758	0.428882	19.7026
0.0195974	0.0645524	0.0747589	0.0290063					0.0390715			0.585465	7.52643	1.4257	4.18667	4.29318	10.5252	5.04686	7.17188	4.85115	13.9662
0.00729578	0.0304216	0.013724	0.00176817					0.0220409			2.60313	4.36615	1.31475	5.37823	4.27921	7.3641	4.17536	8.88184	8.03866	6.1355
0.0810285	0.00363862	0.180645	0.0581397					0.0394421			5.92103	4.38898	1.82113	4.43057	6.27639	4.40569	4.44048	9.50741	10.9932	3.03866
0.0302305	0.0948491	0.021734	0.049351					0.111588			8.39433	6.99407	1.8382	2.88325	1.09069	3.72357	3.88542	4.45827	8.46896	10.3068
0.055146	0.277894	0.121775	0.0126453					0.0544575			10.5962	4.26672	1.29583	2.46871	4.66101	2.00853	2.73569	5.88454	9.12236	9.20066
0.107505	0.204605	0.0175649	0.0708105					0.15294			12.301	2.24286	1.08829	2.62604	4.79056	2.5557	1.77823	5.94878	5.06611	5.75346
0.0136371	0.0157919	0.0107667	0.0368831					0.265633			11.3756	0.913725	1.99812	1.9053	3.10922	2.91453	5.19228	3.68389	7.76387	5.06078
0.00147335	0.0622903	0.0647232	0.173283					0.150921			7.06201	3.69553	2.02865	0.804441	2.4808	2.24212	2.95244	2.05532	14.2028	5.6102
0.0619113	0.113544	0.137318	0.013705					0.216151			5.55695	6.06383	1.66217	2.76977	3.16365	3.14918	3.04169	3.98815	13.3808	13.6364
0.0667999	0.0101483	0.0159763	0.186135					0.0994432			6.1888	9.27211	4.35376	2.36837	4.89119	4.82879	4.76631	2.84742	9.87012	12.5885
0.215415	0.114691	0.023172	0.137906					0.0491746			3.18783	4.13252	6.00607	1.14631	6.18399	6.89104	2.35721	3.94877	6.55961	14.0328
0.0274057	0.0183736	0.23913	0.0646298					0.0877759			2.09806	9.87443	4.26881	1.80292	2.35852	5.46153	2.7283	3.90468	5.20347	13.8704
0.149312	0.270605	0.021566	0.0257994					0.0311137			4.37057	15.5516	2.18459	2.64883	3.43157	3.6558	4.48745	2.9132	5.48192	10.3377
0.331937	0.111042	0.0177661	0.0504381					0.00849526			3.99842	16.2545	1.83263	8.69827	5.59435	2.5126	4.22616	4.194	4.61642	7.69587
0.0604245	0.15773	0.0138887	0.0399472					0.00962459			9.15477	11.7687	1.81401	16.0527	7.74262	3.3801	2.0604	8.22369	2.29557	2.22367
0.0148093	0.0257622	0.0772652	0.0814785					0.0167619			1.48711	8.79177	3.06153	16.8868	6.95853	1.79741	7.0426	11.3821	2.8779	15.6836
0.0244872	0.0219833	0.173399	0.0141485					0.0493684			18.7091	6.41268	5.2273	11.9607	2.30335	3.29105	6.28291	7.90897	4.01005	16.0041
0.00862285	0.010858	0.00707465	0.0266445					0.189336			7.01763	3.6602	3.79551	4.37772	2.33635	7.57732	4.52574	5.45624	4.15257	14.2455
0.33361	0.0189174	0.00703484	0.00792414					0.0175348			0.742646	3.16524	2.55202	6.49545	3.8771	10.0338	2.26843	1.96198	4.65808	12.2896
0.0136872	0.0140018	0.225309	0.110689					0.157211			0.853526	3.47634	2.7782	14.191	6.14324	10.7076	5.06332	1.80265	4.41306	9.95974
0.181711	0.0278695	0.0434863	0.0585052					0.101433			3.33277	3.79041	1.55879	11.7017	5.98176	9.24965	5.63184	3.76637	5.5178	7.20083
0.109637	0.0181844	0.0206617	0.230661					0.022417			3.18413	2.94513	1.58019	3.79867	3.80828	10.8664	6.64252	5.39122	8.6027	5.48357
0.214372	0.115494	0.173618	0.0596544					0.0542157			3.51023	2.06652	1.93341	7.78039	5.25948	11.9964	6.47029	7.55939	10.4648	4.47497
0.110038	0.115101	0.0838774	0.134481					0.197417			6.60644	3.08541	2.7391	14.1073	3.08758	6.62274	2.22337	6.32797	7.32002	2.59356
0.0132935	0.0888645	0.211387	0.0418701					0.0749617			5.90659	16.9402	3.93688	14.2556	2.28828	2.71804	5.95913	3.51205	2.47336	3.22457
0.0208606	0.018636	0.0209671	0.0620204					0.0110359			6.02373	10.5628	1.7539	11.7289	1.90976	3.73206	11.8901	2.22372	4.32745	8.67006
0.119975	0.0049667	0.0403048	0.0800389					0.0333752			6.48495	7.06583	1.76799	12.411	6.21694	4.07966	12.5358	8.68983	12.0201	13.9999
0.0254075	0.0145187	0.030296	0.0612782					0.159927			5.52231	14.5964	1.49298	1.99857	9.1939	5.15156	7.7684	13.8496	5.26022	19.898
0.107836	0.0380252	0.0194823	0.0410949					0.167656			3.23486	10.9043	0.611873	3.5167	10.093	2.67611	2.71544	19.2095	5.56347	22.8541
0.174307	0.0219571	0.360298	0.0797641					0.0608272			3.21506	14.3127	2.21677	12.7287	9.79091	2.18016	3.13814	15.1863	5.34798	22.4421
0.0565968	0.0451843	0.0980386	0.213434					0.0146143			4.73802	11.3886	2.72433	6.3037	6.26524	3.36059	1.68085	7.72313	4.74973	20.1997
0.333763	0.0913964	0.0150116	0.0260672					0.0790985			5.71089	8.44722	0.76438	6.59936	1.0462	3.87949	1.26638	5.33281	5.39771	14.0887
0.193041	0.0239138	0.0154507	0.0669334					0.0974175			7.86547	4.44576	0.312286	10.327	0.870251	2.68273	14.498	6.08139	8.04616	10.6793
0.0428126	0.0186973	0.0767063	0.265373					0.0397787			4.07234	0.803384	2.27938	12.6196	2.21567	0.686922	2.89961	8.45796	10.9733	13.7069
0.020486	0.0395612	0.0235494	0.0139254					0.0815248			3.27905	2.88235	4.57768	9.84121	4.27542	1.06149	8.64889	10.4895	12.9857	10.4576
0.235521	0.000665829	0.0134008	0.0463401					0.0954152			6.5074	6.75367	5.54997	2.6214	3.59953	1.54316	7.34775	7.08958	6.64908	10.472
0.055973	0.0159672	0.0219733	0.1478					0.0171167			5.15245	6.33646	3.22784	2.34241	8.07259	0.762391	2.70168	6.8494	7.39184	8.90477
0.134805	0.173419	0.0422279	0.00299726					0.269307			3.93324	5.16643	1.84811	1.42496	4.91099	1.36077	2.94662	8.30547	4.37514	3.53051
0.0258278	0.0536419	0.12145	0.0187935					0.0390787			5.31597	4.00536	2.90243	0.540923	4.25475	2.13483	2.29019	7.92786	6.36915	2.23338
0.227342	0.142597	0.00949942	0.0889504					0.0284695			7.04665	3.5929	0.813891	2.82328	1.6177	3.18284	5.82136	8.54453	8.27672	2.29678
0.128591	0.0339111	0.0159832	0.128075					0.331705			10.7559	3.10884	4.51861	3.72298	4.36063	8.62768	1.82244	12.8789	7.50004	2.66768
0.18685	0.0375514	0.150768	0.0468513					0.123118			13.167	2.23054	6.14655	2.44339	5.72243	13.9349	9.46275	16.0122	9.47571	7.75842
0.132497	0.0299599	0.038509	0.0147593					0.128816			8.60744	2.83462	4.43549	0.584845	9.66948	14.9064	16.3489	18.323	11.527	8.51871
0.181286	0.104933	0.0317909	0.0494043					0.0464044			1.65313	3.31449	2.01237	7.50969	9.0774	9.20658	15.7495	17.396	10.1939	8.01159
0.0773365	0.158882	0.0128869	0.105705					0.128851			8.10587	4.31928	1.34445	14.7209	10.7338	3.52099	6.18735	12.5655	5.87714	12.3542
0.121105	0.091964	0.110411	0.0267933					0.0515219			22.8437	6.49483	1.58902	14.5937	5.19394	2.21646	6.71086	7.95676	5.02895	17.9997
0.177938	0.206862	0.2361	0.0171673					0.0444133			21.4314	4.23486	2.35201	13.3757	2.92821	3.14416	2.01231	9.00162	12.2839	16.1305
0.00923816	0.324073	0.124416	0.032715					0.066856			17.2111	4.48068	3.31057	10.8607	8.92958	5.27426	9.30913	8.94816	3.10405	4.78325
0.016337	0.00648611	0.121643	0.117554					0.0645719			14.2907	6.63885	4.84976	5.16614	12.9624	6.60657	5.00846	10.1944	4.55288	5.69008
0.140341	0.00998093	0.0507788	0.0197842					0.096544			8.39331	6.47412	4.99465	4.06589	3.56545	7.59064	8.43204	2.68214	7.84744	7.71078
0.180685	0.0112395	0.119012	0.101223					0.368522			10.713	15.1314	1.26796	3.89977	4.20831	3.74656	4.75826	4.30874	8.16249	11.8923
0.073324	0.0334026	0.00450993	0.116311					0.299998			10.1441	16.7092	6.07678	2.41437	7.96864	2.13237	4.35572	6.41104	3.86813	11.3746
0.119304	0.0175354	0.125118	0.0090558					0.0697483			8.05249	8.84243	11.796	5.34354	4.30314	0.635471	3.84265	6.27897	5.20607	14.3848
0.125228	0.0373351	0.0358417	0.0120664					0.00708241			7.9099	3.79839	9.91909	13.3464	6.03214	4.08776	3.35198	7.28683	5.2998	14.2231
0.0607832	0.12208	0.00363398	0.0584887					0.036034			8.52572	11.5945	3.31808	12.7524	4.64757	5.73333	4.95954	10.0032	4.22077	10.126
0.0260404	0.0133717	0.177187	0.0328224					0.13554			7.62327	8.58278	2.30646	9.48021	2.04228	11.172	2.26168	13.4693	2.76574	5.00043
0.0898199	0.0215914	0.0179999	0.0491575					0.0411579			8.0629	5.7274	3.51116	8.49225	3.05034	6.38356	4.31223	12.9441	2.22157	5.44298
0.104708	0.0242277	0.190323	0.00984228					0.178163			10.2981	8.39614	4.04235	6.8262	4.77661	5.90084	5.29823	8.91618	1.87646	9.28061
0.0164407	0.0398053	0.233653	0.095632					0.00893751			9.94874	6.12175	3.16069	1.17144	5.20859	3.07064	2.71075	12.3491	3.02368	7.90041
0.280125	0.04787	0.0237698	0.0104639					0.0332224			6.14058	5.23594	1.25788	3.49659	2.46775	1.31693	0.897153	19.5861	5.75445	16.8691
0.219825	0.0611066	0.191386	0.0296805					0.10527			3.35748	6.494	1.75562	7.87038	4.86272	2.34287	0.94862	21.4349	8.96265	11.3517
0.017339	0.0767756	0.014664	0.00760644					0.138887			4.05372	8.84528	2.69575	11.625	4.55839	1.06093	3.92507	15.3923	8.72442	9.53197
0.0578758	0.0859381	0.166675	0.0075827					0.0995235			3.42663	9.0515	1.29497	10.021	4.55247	3.01697	16.1939	7.01886	7.29649	17.68
0.0109927	0.0361856	0.019083	0.0439355					0.0817665			0.42062	9.0649	4.11275	1.62269	2.85591	1.42048	17.5675	6.3027	9.16754	15.3041
0.244536	0.0307329	0.0594261	0.0969498					0.108493			2.67809	9.47908	3.29012	2.33663	3.94636	3.25369	13.1075	8.25585	10.4808	11.3356
0.0745802	0.128548	0.203489	0.00716634					0.0684759			4.04935	10.1041	2.56414	3.374	5.00554	7.04161	7.40819	8.96234	8.58807	16.2007
0.0316845	0.0708404	0.0838624	0.0481807					0.11469			4.21639	10.9604	4.0424	11.2715	1.23027	6.27949	3.64382	3.40547	7.49716	20.7822
0.0353531	0.0700218	0.0348102	0.0386619					0.0716211			4.0587	9.89516	7.89522	12.702	4.01553	1.85318	0.734122	5.36486	7.95995	18.9404
0.0177182	0.137518	0.0536797	0.00707799					0.0101261			4.23132	7.58909	10.4777	10.1187	5.08306	1.18382	4.05931	10.507	5.25635	8.49329
0.261793	0.24859	0.0663241	0.246254					0.0150569			3.77412	6.25862	5.6351	7.0369	4.61982	3.29503	5.60622	14.5461	0.89392	6.30018
0.0296395	0.234106	0.0352493	0.0970485					0.154542			2.64346	5.29226	4.71376	3.34031	3.77567	4.09034	2.83153	10.5124	3.9558	7.07007
0.029793	0.0165119	0.0528035	0.0575706					0.0913811			5.50511	19.3567	3.68265	6.30327	3.11867	3.70428	4.5749	9.13251	2.47174	10.5719
0.0349221	0.0773452	0.0242274	0.020038					0.0222452			7.524	13.8046	1.21009	3.83449	1.0436	5.77591	14.5085	1.81116	2.21847	12.575
0.0198996	0.113586	0.0611874	0.0513587					0.0144032			6.56416	3.91997	1.03735	1.74836	4.09858	4.52526	18.1315	6.89686	5.22165	2.71114
0.0906884	0.131661	0.0382912	0.186712					0.0466905			2.59437	2.27472	1.36162	10.3506	6.58195	2.21344	5.71162	5.66623	5.12035	4.47214
0.235385	0.00210403	0.195902	0.0912724					0.128496			1.59275	6.98778	5.11039	8.25449	5.81459	1.62588	3.79753	1.96739	1.84213	10.2782
0.0934869	0.00470091	0.0084166	0.0987692					0.0327863			3.89009	7.63745	9.13723	8.91025	6.70796	1.11266	6.62379	6.06446	4.74267	19.1277
0.137251	0.0621294	0.229627	0.0511212					0.0918314			2.78547	2.34845	10.3721	4.29032	6.60658	4.22206	10.6233	5.18487	7.14751	2.45523
0.0269372	0.0377923	0.129357	0.0152262					0.0200376			0.846438	1.41467	4.17634	3.78071	3.82853	5.28142	14.048	7.79563	7.17203	12.7429
0.10789	0.114439	0.0233641	0.0539355					0.0108465			3.37052	3.46145	7.58179	1.85009	1.29221	3.60218	5.33719	11.3738	6.17697	15.1518
0.0124016	0.0659191	0.0300737	0.0259001					0.0835063			3.71859	2.7894	13.1296	3.02937	5.81773	4.12027	7.94205	8.77333	6.85247	13.8665
0.0322594	0.0926177	0.116284	0.0321686					0.0878412			2.21884	2.01674	11.4607	7.36257	8.42175	2.96754	11.9555	6.63196	8.05223	10.9635
0.119244	0.109706	0.0260988	0.0604865					0.107934			2.20278	3.15239	7.72849	4.84228	11.7911	2.77148	7.78616	9.2985	8.32401	8.38229
0.0632876	0.0374955	0.0196376	0.0156612					0.28601			0.26831	5.58341	5.4604	10.931	9.59081	4.32866	4.17446	10.2653	8.68448	6.11128
0.100491	0.00268864	0.0303526	0.0144552					0.0630832			2.86173	6.23182	5.20264	10.9421	8.51509	1.76173	6.06314	8.93085	8.29323	4.17919
0.0127269	0.0372356	0.0219294	0.0258795					0.23712			3.13063	4.78178	3.92022	6.81573	6.70053	7.17541	3.86299	8.19526	6.15646	2.84346
0.0186079	0.0563561	0.019638	0.0124138					0.0650571			1.44991	4.89575	1.10407	4.16162	3.50806	7.56116	3.39187	7.72901	3.37334	6.27632
0.00823294	0.133386	0.0660172	0.0352401					0.0522097			2.50513	5.62724	1.19557	5.89309	5.75042	3.09273	3.63671	7.67496	2.63614	7.20476
0.0241604	0.0161813	0.0452723	0.0065774					0.174228			3.23939	2.28855	2.35183	6.65342	8.80632	1.08262	4.14781	6.0957	4.03438	6.36524
0.096517	0.0700093	0.171078	0.0603391					0.234706			3.70545	1.48504	1.56155	5.63222	8.23871	7.74815	4.22518	7.57101	6.66326	3.78205
0.0579809	0.00183474	0.0049246	0.00459664					0.096656			3.98963	5.15802	1.71445	6.84395	5.83774	7.82434	4.01287	16.135	7.4309	0.393306
0.0730196	0.0190055	0.0151238	0.074098					0.104969			5.38008	9.23096	1.63955	6.14338	3.5685	1.59756	2.54538	10.3109	7.07477	3.8337
0.075585	0.0245587	0.0153252	0.0431837					0.0113131			8.26068	6.67475	1.47112	4.96261	3.06638	5.66917	2.15483	9.30185	6.39974	7.83301
0.0893454	0.104943	0.0299205	0.0367609					0.00851919			8.68195	3.44064	5.59857	10.6889	4.82984	3.3213	1.2135	0.196716	4.79121	6.63244
0.0365579	0.118474	0.0122389	0.00816893					0.055232			8.65216	4.46109	9.24266	7.12065	6.09215	7.31854	11.1791	9.65665	3.88216	7.3288
0.0194901	0.0142765	0.0138214	0.0674097					0.00353001			9.60811	7.51494	7.3976	3.6666	5.02916	16.0083	14.5453	30.0388	4.38222	6.8315
0.232156	0.0616723	0.0217626	0.0133391					0.0581959			8.41462	11.7412	11.4606	4.20175	0.621304	12.9255	9.61786	18.5666	7.1164	9.14046
0.00661626	0.0177196	0.0214458	0.0481022					0.0249283			5.7122	13.4381	18.8507	2.17976	10.3747	4.68889	0.99642	10.6577	6.99152	7.83236
0.0506746	0.0653287	0.0433378	0.0127366					0.102552			3.72896	10.2572	14.0325	6.79524	7.06025	3.08168	5.57283	6.81845	5.4468	2.05014
0.143179	0.0271892	0.00149413	0.0226539					0.0995733			2.94986	3.73781	7.64548	7.94112	1.66368	4.80731	2.5962	4.79104	4.1526	10.2878
0.139854	0.0741916	0.0667672	0.0602289					0.0694108			5.98864	7.51644	6.82164	8.36393	3.64142	4.33738	3.03651	6.40482	3.61305	11.172
0.0707335	0.029156	0.0186141	0.00431432					0.0103924			6.78028	8.79242	10.207	4.44864	2.56981	0.596907	6.64209	5.09774	4.09718	8.6835
0.217362	0.0088562	0.177556	0.0355426					0.0192078			5.32242	4.47207	8.67542	16.4851	10.1561	3.7448	12.3847	8.07755	3.2583	8.32788
0.458091	0.0915864	0.137788	0.0552275					0.0754651			4.2719	2.69806	0.905801	11.5829	3.23485	4.47543	13.04	13.3669	3.1623	0.304917
0.181663	0.0442437	0.0167126	0.0313495					0.0307002			4.41485	13.3386	6.11205	8.56004	6.04059	1.72293	8.98964	15.9341	8.2864	5.60962
0.0206072	0.0213867	0.136094	0.0798453					0.0500979			4.263	12.2532	10.878	7.53997	5.4263	7.32644	3.22322	17.6991	10.4203	8.98357
0.0462914	0.0525652	0.0202222	0.000964338					0.19068			12.4123	5.63522	11.5564	6.4835	0.69161	11.3153	5.4866	17.256	6.67411	6.71356
0.280201	0.129812	0.0573463	0.0404354					0.0584166			8.33945	3.84439	8.0738	3.69956	8.62013	11.6091	12.3443	7.8741	2.25528	7.00271
0.303055	0.258835	0.0608191	0.0139862					0.116212			3.59812	3.20752	4.95549	2.11641	14.8209	3.47043	3.20132	11.4921	4.03486	2.75809
0.289275	0.0540744	0.0635324	0.0328248					0.0516888			4.09685	2.97439	2.7411	4.47865	12.5002	5.8665	6.09923	5.93376	4.61095	1.69688
0.0911397	0.0175543	0.0118069	0.0683282					0.0136384			4.44433	3.64567	1.94249	4.87011	7.12019	6.67832	7.5939	3.9647	4.71334	3.75997
0.0751835	0.0576172	0.0134561	0.0303753					0.0182648			8.50399	3.97233	4.08615	3.58677	7.39083	5.39493	5.32005	4.09944	2.17495	14.9705
0.160583	0.0554976	0.00935238	0.0637546					0.166074			6.25808	1.80183	7.28066	3.3727	11.7876	4.8167	0.443584	7.24286	3.7544	14.5237
0.128194	0.0199816	0.0181643	0.0632254					0.0625019			12.8369	2.68415	3.02065	3.1249	14.0458	3.25886	4.82053	7.87252	5.64343	12.8853
0.0698092	0.0236052	0.0699174	0.00457416					0.0605215			18.4781	3.30217	8.21939	6.05837	10.1879	3.83299	4.69588	9.68771	6.12708	10.947
0.0323715	0.0655749	0.0165009	0.0649013					0.00882746			16.5823	2.07543	14.5246	8.72657	7.03867	1.77252	2.21331	9.53648	5.19456	11.5103
0.0162149	0.0766943	0.0889789	0.0515762					0.0328712			10.0793	4.46618	10.6305	9.1375	4.41015	2.93959	5.25626	6.08641	2.93626	10.4123
0.0865066	0.0605496	0.00741255	0.0272447					0.076608			3.09376	9.98761	4.56481	9.82207	2.7009	3.33207	17.8218	4.83145	1.68019	6.0192
0.454882	0.31253	0.062515	0.0535631					0.162716			1.86131	11.5666	1.97096	6.62288	6.38159	2.54639	18.2665	13.4711	3.52582	3.34252
0.0434832	0.0660721	0.0130159	0.0026656					0.0941326			1.72163	7.04256	2.72277	2.3806	7.50824	2.59316	5.64606	12.4203	4.98429	3.53947
0.00956517	0.0377816	0.0154226	0.0343407					0.104905			3.87793	2.68249	4.97259	2.25296	6.87813	2.144	10.3335	7.38009	5.54576	2.02556
0.0862234	0.103121	0.0358282	0.0325346					0.0376015			3.97807	13.5257	7.81769	4.69543	6.64353	2.29704	15.9518	9.28431	5.09018	2.04186
0.0928573	0.0362902	0.00813084	0.0539066					0.0100496			4.01384	10.2371	5.51148	9.98688	5.48257	1.79228	16.8781	8.98209	3.067	5.78715
0.0644677	0.16301	0.00405792	0.0222902					0.0388182			3.99957	7.69427	6.67181	14.8151	5.09967	3.48114	11.8768	3.14983	5.50459	7.96134
0.205736	0.246715	0.0120997	0.199846					0.131593			3.23161	5.54893	4.88537	7.06611	3.22967	6.366	9.13246	5.03716	8.13528	7.32218
0.0925538	0.0314218	0.0469633	0.0387093					0.0638211			2.34639	8.50308	0.300793	7.20981	4.56661	5.78296	9.11088	15.243	7.22378	4.10058
0.0598254	0.00141294	0.0769681	0.0120954					0.0808079			1.99695	10.3793	3.02266	9.57545	6.84641	4.16859	8.70374	3.87944	6.59175	0.596666
0.0995526	0.00147939	0.0449455	0.0550583					0.024258			5.69107	7.50644	7.23547	6.51896	7.61223	4.47432	3.47279	5.64473	6.13576	5.0576
0.205754	0.0503643	0.0600089	0.0615721					0.0424001			8.34584	7.06704	10.297	11.3393	6.46216	4.79554	4.12158	8.97859	5.53247	13.4084
0.0383927	0.0238026	0.00969965	0.0370998					0.0273069			7.33289	7.09824	10.9581	12.0438	7.50061	4.78885	6.86403	10.8772	4.70457	19.8322
0.0106401	0.0719783	0.00958649	0.0281855					0.0509715			3.539	5.17707	9.07241	10.127	7.15834	5.80322	5.94811	5.86094	5.72201	18.4244
0.123412	0.0695013	0.201534	0.0419815					0.170792			1.81798	7.46706	0.817449	4.71814	6.34946	4.20493	2.53196	3.75699	4.69958	15.3137
0.280999	0.0570172	0.0172631	0.00229505					0.0512758			10.6636	6.35861	1.8823	4.24071	8.99139	8.66773	2.31992	5.79197	3.61991	16.386
0.0320903	0.0739452	0.0215643	0.074874					0.015949			14.4866	4.70253	1.92799	6.24909	8.85181	1.65136	4.05996	15.9719	8.38181	14.8791
0.0388835	0.0665089	0.0159762	0.0799116					0.0318422			8.3536	6.61256	5.74634	3.6913	6.8167	2.46612	0.514358	5.37052	9.25621	8.05908
0.0349076	0.02791	0.0137056	0.0400924					0.00691013			2.23457	8.84247	8.73813	8.89797	8.63078	2.22158	6.01115	2.94459	10.486	3.93985
0.0575547	0.0350331	0.0619794	0.0441465					0.0704073			0.648896	11.0918	10.5798	15.354	6.11925	4.34241	8.06385	3.94139	14.8735	2.12728
0.0586333	0.0111645	0.077677	0.0687344					0.0273442			15.0394	11.4235	12.0168	16.4038	2.00042	4.74315	7.56758	6.92432	19.7518	6.67591
0.0639411	0.0385168	0.0166291	0.0574592					0.0720116			13.7161	5.95907	10.9409	9.42855	4.91964	2.47054	5.77932	7.96752	20.4254	9.23761
0.0470435	0.228995	0.0467728	0.0154518					0.0039258			9.3431	2.21207	5.05533	7.12637	4.96073	2.66661	4.62333	6.00119	19.2416	8.59814
0.00299662	0.247236	0.140723	0.0157251					0.00964168			7.66475	7.50574	8.47912	12.0495	2.32443	5.20531	4.1762	4.67605	10.9725	6.18098
0	0.0152216	0.0251801	0.0367349					0.0299731			8.50643	7.72229	2.35208	13.5304	7.30898	6.18811	2.86805	8.35687	9.45443	5.01846
0.077477	0.106332	0.0961178	0.076274					0.16312			8.41935	4.57421	1.46158	9.39487	7.45484	3.67186	2.55782	8.11215	7.82467	6.12183
0.118347	0.012565	0.025038	0.167742					0.0375425			5.70221	5.07391	0.514892	6.66754	3.90217	1.36866	2.93135	8.17431	8.61978	13.2028
0.0247837	0.134963	0.0967772	0.118603					0.310661			4.50042	5.4035	0.313341	6.13025	3.01909	2.05394	4.30452	11.37	7.56668	20.8096
0.0479585	0.0248153	0.0529732	0.0496348					0.315617			4.12483	4.31942	1.16062	5.59259	5.33591	3.31213	4.5398	12.8761	6.44389	23.2835
0.000545261	0.025728	0.0817121	0.0884945					0.0319985			4.43532	5.96843	2.60855	5.07582	6.17364	5.1865	7.12202	11.05	6.19508	22.2839
0.127673	0.0208634	0.0703597	0.0618541					0.0213113			5.00236	7.74109	3.23505	3.85842	2.92181	3.76995	8.58881	7.8516	7.15751	23.5515
0.0735518	0.0764276	0.116984	0.0686036					0.141211			14.1298	6.78565	3.50035	7.51016	8.23576	3.01091	5.03709	5.68337	8.50536	22.9494
0.0766207	0.102665	0.0455581	0.0982681					0.0883779			17.5083	5.88855	5.32462	7.65395	11.1442	4.90721	1.16647	4.57374	10.2462	14.3352
0.177473	0.303818	0.0543335	0.0292161					0.0110971			17.9201	4.95515	1.80075	3.64383	5.92245	4.28813	6.0004	4.17059	12.0909	7.63668
0.00557576	0.0724831	0.0363472	0.0911869					0.0119103			6.18382	4.67062	5.86893	1.84072	3.5228	1.79792	6.51016	3.55574	9.86673	5.19637
0.0362566	0.0306254	0.0761611	0.0771557					0.0314323			5.47417	3.71062	8.78661	3.1205	8.29698	4.32829	4.23258	2.57297	3.5192	4.84101
0.242944	0.0772354	0.0359674	0.041005					0.166735			15.9051	3.28795	8.02543	3.84205	6.9085	3.6761	1.59649	4.88651	2.53148	4.77237
0.0262347	0.162996	0.0311957	0.0461717					0.0737326			19.1766	1.89822	4.90436	6.00999	2.3879	2.23065	3.99412	13.7388	4.44339	7.27585
0.0631282	0.0449762	0.113878	0.0059652					0.0470668			16.0209	8.14247	3.25161	10.2431	3.05408	4.02199	1.91325	14.6242	4.46322	3.24137
0.151046	0.11201	0.0852532	0.0338593					0.230808			6.57372	6.39318	1.85002	10.7898	4.55476	2.10328	7.82947	10.7399	4.29055	7.8792
0.0904909	0.105336	0.0109677	0.176973					0.153979			1.16583	2.91395	4.51562	2.20823	8.58291	3.51097	10.6087	9.51987	4.47677	8.07717
0.00026653	0.0364463	0.00784604	0.0682484					0.0590823			3.37007	7.03132	8.5777	10.8921	5.83952	3.55575	3.66742	7.85046	5.24554	9.48857
0.062706	0.0449176	0.0776733	0.0420543					0.0848888			7.51255	5.64352	7.72156	13.3758	5.3133	2.50942	4.97813	5.71326	7.41886	7.09439
0.0732493	0.117103	0.0338877	0.0181831					0.207452			6.26698	5.53839	3.01877	6.25289	8.92529	2.35967	5.54702	5.4962	7.21743	7.25528
0.152232	0.102003	0.158739	0.0371094					0.108637			5.22562	0.876435	5.63929	7.10651	3.77328	2.52175	6.04154	5.0234	5.3441	8.04019
0.0354233	0.0317446	0.0138574	0.0219083					0.0568521			8.77698	4.37847	7.66408	0.738174	3.1708	0.866405	9.52017	3.28721	3.79684	9.07701
0	0.032637	0.0191524	0.0102662					0.0656005			5.22643	5.42753	5.40544	1.60412	0.770223	5.90839	8.14513	3.03021	2.54848	11.8021
0	0.206012	0.0840418	0.0472155					0.00427898			2.30426	6.28491	2.2886	6.46917	8.82425	9.48986	5.20308	5.88029	3.10644	17.9164
0.022176	0.103649	0.0273836	0.0693904					0.0378237			2.27273	5.26947	4.05766	10.4245	3.77136	9.79175	14.7654	11.675	4.58533	1.84977
0.0182656	0.0237275	0.0328567	0.0113466					0.189424			8.04789	3.12751	4.53954	3.92617	2.57429	6.66324	7.5701	0.705944	5.19692	6.53271
0.0505227	0.0574333	0.00568888	0.0578275					0.0911072			15.3389	4.9061	6.24067	3.08128	1.71731	3.40596	12.8866	3.97195	3.85784	4.06466
0.140171	0.0166865	0.177535	0.100852					0.0769845			10.8521	7.90195	1.0006	2.97915	1.39658	1.49073	12.2007	8.9954	2.4303	2.68561
0.112534	0.0595143	0.0482607	0.0283019					0.129067			12.576	8.3809	0.835848	1.15232	5.67219	4.07056	1.11199	12.7865	2.24721	8.31298
0.0539745	0.0791096	0.00472773	0.125754					0.0142618			10.2183	3.02228	0.529197	4.64409	6.76728	0.587434	18.8541	15.2128	2.78996	14.2828
0.0170521	0.0140921	0.101659	0.0498359					0.0873086			11.3463	5.01208	0.338142	7.57956	3.19162	3.35724	9.38221	16.5319	3.28925	12.3953
0.0166399	0.0388257	0.0204911	0.0149003					0.0344632			13.7911	7.63197	0.951429	8.36343	5.1946	0.635438	1.38666	14.3587	5.9984	2.94662
0.147017	0.010238	0.11419	0.0882566					0.0978533			15.9181	5.70584	0	9.20085	4.76703	5.49285	5.15967	8.33749	6.61818	5.48415
0.204899	0.0534353	0.0433516	0.0208861					0.215468			17.9692	2.76457	0.818163	5.75153	9.887	5.77438	3.75025	2.33124	6.25673	11.2618
0.113738	0.0418693	0.0476141	0.10677					0.133932			14.5038	0.84079	0.133265	2.9961	1.18849	4.52095	2.0976	7.25501	4.01714	7.84113
0.296993	0.00844954	0.114772	0.0561451					0.0897478			13.0172	1.02399	1.28957	9.3544	1.9169	4.0987	1.75583	12.9632	3.02153	9.42318
0.0265191	0.0123562	0.132481	0.0622559					0.0964087			9.16219	2.61637	0.893638	9.36933	3.04987	4.87355	3.28683	8.9717	4.55959	9.49027
0.0749158	0.0143564	0.0284706	0.0247172					0.397643			4.26246	7.79134	0.288967	6.49229	3.89212	3.61336	6.77318	2.97518	3.15997	9.91478
0.0203398	0.0510196	0.349891	0.0175083					0.121326			0.836352	9.67953	0.529197	3.87944	3.86832	2.98896	9.79952	5.68214	1.5841	15.3322
0.0492671	0.0790554	0.172874	0.0311025					0.0178196			3.46488	4.11922	0.0577903	10.9834	2.50578	4.48836	3.99416	1.3051	5.46762	23.0704
0.0170159	0.0178577	0.0196195	0.0334404					0.0119116			4.16416	9.21955	0.133265	7.9075	4.54836	6.65681	6.40371	1.42257	8.49678	23.3069
0.0283877	0.00744248	0.0467418	0.0147035					0.126378			18.038	9.77059	0.546881	5.59999	4.63222	3.75993	11.5389	2.95985	10.0546	17.6321
0.225505	0.0722122	0.00558956	0.125694					0.00962927			11.6585	3.3496	1.89424	2.39781	6.32094	1.44692	12.8199	3.24097	10.1449	14.1314
0.212375	0.160075	0.0132371	0.14526					0.179679			2.60466	2.21573	1.84507	4.06088	5.47337	2.97901	11.5767	2.26714	10.7223	15.275
0.00454387	0.0840944	0.0164882	0.0865728					0.0091527			3.41002	7.25249	0.555497	7.11964	3.45183	3.17623	7.1683	8.79591	14.0373	18.2716
0.0273191	0.0405818	0.174117	0.0298274					0.0688075			4.14864	14.615	2.42344	5.74976	2.85641	3.27824	2.25052	10.7393	0.8097	18.6913
0.0729807	0.0772798	0.011901	0.0514793					0.3041			6.60055	12.1776	2.20089	2.10272	4.90426	4.30696	4.99206	7.53595	1.6516	16.7291
0.355926	0.117533	0.0607078	0.0424886					0.218107			10.9053	8.33446	1.26713	2.646	6.58239	8.17127	5.08347	5.78558	1.90188	13.8077
0.100585	0.064157	0.0281872	0.0292726					0.10015			17.7816	7.00442	9.23706e-13	3.13548	7.46727	3.65168	3.6754	2.98425	3.61263	10.3773
0.0405593	0.0458298	0.0829742	0.0631309					0.0363464			21.3676	5.32809	1.13387	2.12096	7.5826	4.54451	1.92735	1.9524	5.08093	9.59151
0.033309	0.198913	0.137084	0.0397698					0.151133			20.3044	0.310686	0.338142	2.02844	2.9247	5.10463	4.29268	4.43966	3.44713	1.25167
0.198732	0.0712945	0.0975963	0.03678					0.114905			15.6544	8.45956	0.338142	2.38484	3.77714	3.83545	6.04172	2.38813	2.61978	1.64287
0.0729254	0.0065717	0.0451139	0.0505935					0.00570749			18.5258	5.46366	0.893638	2.30744	7.02642	5.56941	5.21639	5.37947	3.90077	1.68748
0.119295	0.0300465	0.0226557	0.0212421					0.0688652			17.2151	7.70209	0.662462	4.96317	7.99815	12.9854	6.19591	11.2165	1.49765	0.718914
0.0206201	0.0259739	0.0222464	0.0612545					0.206237			12.8865	16.7509	0.0754747	6.70992	6.82947	12.7727	7.12446	10.0951	4.55595	2.05534
0.0177135	0.00760416	0.0230449	0.00704827					0.051831			9.60044	14.8164	0.471407	4.53518	5.65997	7.87629	3.69973	6.94682	5.8471	3.65187
0.0490419	0.116595	0.054087	0.0945632					0.0591802			7.63143	7.45678	0.951429	4.03769	4.8399	5.31992	4.07057	4.33392	5.19642	7.65944
0.174067	0.0511752	0.0331269	0.0612545					0.0511398			5.09334	6.14782	0.133265	4.82062	4.563	7.59494	2.60646	5.06598	7.30774	8.63439
0.0456401	0.0378091	0.201913	0.0374145					0.134122			5.53625	9.08804	1.42284	2.98511	3.49582	7.05802	9.19437	12.6165	16.5088	5.59302
0.0425289	0.0871091	0.0623419	0.0647689					0.0721695			4.17309	22.0574	1.36504	4.50676	2.47344	4.459	7.39846	11.65	24.4005	2.2979
0.0937503	0.0203591	0.14583	0.0582733					0.138812			5.53754	16.2823	0.619183	3.07799	1.57041	3.71925	0.856723	2.17904	19.1392	2.56076
0.447681	0.0086598	0.0276563	0.046142					0.0461793			9.8856	10.8275	0.489881	1.48227	1.76711	0.90893	1.32102	6.83441	6.43339	5.09328
0.0643114	0.00857345	0.0320695	0.0367402					0.0135			15.9227	2.10778	0.893638	6.00747	0.971946	2.81349	2.79645	7.31454	3.5377	3.98294
0.383397	0.183145	0.0565121	0.0194225					0.0253059			12.0977	4.58858	0.529197	6.9319	1.67901	2.0979	2.97001	4.9501	2.54798	3.7168
0.0718254	0.103971	0.0336113	0.0051773					0.0349827			1.45925	6.71447	0.529197	6.3893	3.23728	2.17637	5.08403	3.30561	10.6343	4.66707
0.0218558	0.0382575	0.121085	0.0191535					0.0118309			7.92894	3.416	0.893638	7.39174	5.35046	4.21651	8.53239	0.707432	13.9258	13.5814
0.0477994	0.00255052	0.136024	0.0494334					0.0200723			8.24102	7.9735	0.489881	5.4348	4.54278	8.91499	6.46228	3.63508	10.6073	13.4282
0.111412	0.0280272	0.0958479	0.0128926					0.223972			4.77471	12.4174	0.604672	2.81456	2.99346	7.6217	1.74686	6.50123	6.6087	4.61367
0.0387611	0.0318742	0.0201467	0.0090654					0.27992			2.54803	9.88664	1.44415	3.19261	1.83293	6.27123	2.90942	10.2949	5.18913	10.2017
0.083227	0.0763753	0.0186286	0.027099					0.128791			1.81487	5.80881	1.68019	1.34821	0.379432	7.36933	5.96063	12.3878	4.63503	12.7214
0.0738673	0.0382203	0.0512209	0.0309051					0.0639692			1.93646	5.77074	0.529197	4.03295	3.91501	5.65748	3.92642	11.2032	3.96145	4.06612
0.0270094	0.186376	0.0139696	0.0245944					0.0780385			3.80857	7.28602	1.39393	4.68151	6.02257	5.01168	1.98091	5.93402	3.09235	9.87495
0.0373742	0.0380149	0.0625445	0.0651547					0.0863999			3.76983	7.10662	1.17335	2.92426	4.86328	9.75776	4.56297	0.0885887	3.05188	20.9834
0.0776186	0.155432	0.0150753	0.0825213					0.145794			3.22678	6.56399	0.894646	7.76271	1.29938	13.9481	4.04134	2.35861	4.74299	2.86644
0.213802	0.00394691	0.0488566	0.0302568					0.104461			4.42023	6.36494	1.29644	7.83343	1.37807	9.4878	6.27905	3.75939	8.37376	1.56467
0.0359853	0.0216163	0.0428594	0.0559696					0.0901199			4.13313	5.83328	9.23706e-13	8.59267	0.932522	1.90634	8.68892	6.00172	9.49973	2.3391
0.410472	0.0358639	0.0706493	0.0615477					0.121544			0.756108	3.13599	1.28957	10.4001	5.56317	3.40143	6.60158	4.90217	10.033	5.32132
0.20012	0.0198625	0.00545008	0.102895					0.0730659			3.29865	2.11775	0.760373	10.2406	2.65193	4.58515	5.38899	0.759854	11.4907	13.8975
0.144138	0.0118115	0.0158862	0.0592984					0.0636689			6.51321	3.91652	0.760373	7.91378	2.58435	15.031	4.38132	3.07804	10.3292	23.7761
0.0162411	0.0181331	0.100059	0.024144					0.0481399			8.01356	4.36716	1.28957	5.02544	3.4448	16.3014	3.42982	2.4937	4.09331	30.0867
0.0520914	0.152814	0.0316233	0.119314					0.0820559			6.18619	2.25516	0.188465	6.64956	4.70461	6.80537	3.36236	5.70106	5.03575	30.5802
0.0125974	0.0507739	0.105394	0.00453747					0.0822221			2.24622	3.42196	0.944254	8.65544	1.67408	3.82376	5.0542	6.74619	9.62137	25.901
0.0615842	0.0677383	0.018157	0.0143054					0.0399168			1.61208	2.23803	0.893638	10.1532	4.0273	2.25533	6.40317	6.57726	11.8792	18.778
0.0491649	0.0976974	0.0337377	0.0825759					0.268185			0.929412	11.2768	1.0887	12.1607	3.40518	5.73459	5.5276	4.79414	16.0431	18.1065
0.0778721	0.0496042	0.0137024	0.0175696					0.0500817			5.16731	5.91817	0.628004	11.0481	4.92883	6.16011	4.24522	3.2237	14.7055	16.8609
0.0664204	0.0863698	0.0919456	0.0410763					0.276734			7.86005	3.07007	0.977421	6.29834	6.41326	5.4217	5.71104	3.92065	11.5101	12.6926
0.104562	0.0307844	0.310719	0.116163					0.0228192			7.03919	4.7269	0.595854	4.51463	3.34765	7.19563	4.29894	5.84733	8.01048	8.38376
0.164106	0.157415	0.0973955	0.0361827					0.18986			12.0282	5.20761	0.274718	3.66718	2.03181	3.30166	3.29506	7.35406	11.8782	8.92646
0.162409	0.0112251	0.10168	0.107075					0.0435032			9.70757	3.5706	0.364441	4.38233	3.5332	3.42396	5.7467	5.41989	17.9255	8.67187
0.033287	0.0131718	0.113996	0.0312156					0.10517			9.89159	12.1024	0.545719	4.58137	1.21938	5.81681	11.5347	1.53121	21.2644	6.11945
0.262326	0.0207889	0.159602	0.0138166					0.027179			5.78199	8.72386	0.489881	5.28735	5.02624	8.15676	8.53792	2.15241	19.3191	8.70865
0.181931	0.0629492	0.0130765	0.0680974					0.031376			3.01326	5.73419	0.913833	8.9803	1.60276	9.9756	4.25849	2.30212	10.571	7.52607
0.0438471	0.183485	0.067091	0.0133693					0.00243212			10.0558	2.72421	0.532343	11.4275	3.46738	9.71529	6.86851	6.085	8.21434	3.99506
0.0193611	0.0679983	0.173374	0.0863069					0.0600296			13.3841	2.4971	0.708713	9.06473	7.78653	8.07338	11.1741	4.06617	7.15211	3.28197
0.143745	0.16062	0.0432214	0.0768182					0.121767			9.94184	4.33034	1.3053	8.52447	7.90908	6.37607	11.0363	10.6504	1.2235	5.91531
0.0360118	0.105568	0.0124894	0.133814					0.234519			6.65084	5.98835	0.471407	3.29732	7.30364	5.74746	4.9806	1.0469	1.74487	5.56667
0.103624	0.0790847	0.0835211	0.109088					0.0571661			5.70081	8.70684	0.828946	2.66497	6.08046	5.94213	6.14562	2.29074	2.39487	5.43953
0.0383321	0.22174	0.0866344	0.0526278					0.250709			4.16785	5.17332	9.23706e-13	2.98333	14.9421	6.73523	15.4169	0.796613	3.24048	6.35055
0.101055	0.0386258	0.0389087	0.0204627					0.218557			4.67936	7.95822	0.818163	4.64948	3.72026	8.3162	14.8289	4.68935	5.88298	9.83647
0.00524966	0.0349801	0.478998	0.0151679					0.056291			13.1245	9.82709	0.188465	9.11445	5.06794	7.48866	9.0581	6.35665	5.39612	19.6634
0.0119481	0.09019	0.153488	0.0306831					0.0987301			10.7983	8.44091	1.24871	3.50803	7.50469	1.24514	10.3484	3.19218	3.97078	24.4055
0.0559496	0.189392	0.313981	0.0753444					0.123358			4.13779	8.34757	0.988367	6.4262	6.09168	7.88273	17.822	2.68408	4.80298	21.7577
0.00537818	0.116859	0.0194901	0.0280051					0.0705975			1.97987	6.83966	1.29561	9.51307	2.18799	8.62555	9.61952	3.83767	1.92939	16.1453
0.053518	0.0121066	0.022848	0.0377807					0.0759607			1.29488	6.11078	1.06579	6.45286	8.31135	4.52651	9.74621	3.03127	2.15038	10.1699
0.287499	0.0266617	0.099595	0.0180527					0.0697811			2.00936	11.7315	0.471407	7.61813	8.28753	2.44531	5.96793	3.73696	2.1557	4.09809
0.082023	0.0865294	0.0343565	0.0273259					0.0184753			2.84713	9.22645	0.893638	11.3422	5.90028	1.61194	4.98725	5.5467	3.25405	5.07006
0.0224185	0.0316746	0.0775156	0.00289046					0.127244			1.11654	5.10408	1.23178	11.9558	6.0129	5.15465	1.25927	6.34156	3.7292	6.89669
0.0671197	0.052781	0.0188829	0.0336275					0.16617			9.70266	1.2741	0.760373	4.22163	8.81569	6.31509	3.83056	5.31163	3.23851	6.35334
0.00677959	0.159694	0.0929438	0.0679318					0.0617539			8.205	2.74455	0.702583	2.50268	12.2357	6.45311	2.15283	1.79798	2.05094	13.9371
0.0230722	0.0754216	0.0343762	0.0466327					0.130629			7.02495	6.95933	2.08955	0.960165	13.171	3.60324	2.32095	3.27779	3.59352	20.1334
0.0414558	0.0338777	0.00994682	0.123233					0.0156287			6.51836	4.50027	0	2.49096	7.71999	1.23488	2.1103	4.77295	6.16932	22.8735
0.154359	0.0213309	0.0505837	0.00932641					0.120934			10.3465	2.35604	0	3.69835	6.61247	2.68627	5.74836	5.54422	6.75736	18.4204
0.0571741	0.0368147	0.0916758	0.00732328					0.068672			14.1558	1.82694	0	3.02105	7.55212	4.39524	8.00093	7.09937	6.71478	10.2534
0.0354045	0.0155057	0.0753032	0.000811897					0.0925848			11.8182	0.866922	0.133265	3.87189	0.686773	8.00823	3.74753	7.62626	8.51112	9.44348
0.0735846	0.0131768	0.0327696	0.0246997					0.0250339			8.35515	4.71472	0.471407	5.84889	4.15012	3.67898	5.45308	6.22899	11.4186	21.7651
0.00964649	0.0671039	0.0258915	0.0205213					0.0980045			6.72715	5.18638	0.893638	2.95709	0.648321	4.68046	5.87221	7.77021	14.4832	9.07408
0.0432299	0.0200385	0.114103	0.00930119					0.00552731			4.77008	3.39219	0	6.44092	4.51225	2.19641	15.3847	9.91685	18.6201	9.28193
0.257361	0.0431052	0.0574943	0.0455459					0.0782011			15.2849	12.3385	0	9.03137	3.86947	8.08786	10.3809	8.58363	21.8803	9.31324
0.056403	0.0130211	0.0380949	0.0684011					0.034621			15.3714	15.6748	0	2.87676	2.68537	10.0987	12.9663	4.1407	1.85572	11.1864
0.193076	0.0544122	0.0142613	0.0115559					0.014778			15.3872	10.7259	0	16.6913	4.23238	7.52546	10.156	7.15514	7.91499	11.6096
0.0402141	0.0282029	0.0227812	0.0405181					0.0892745			15.476	4.20277	0	11.0144	2.48844	6.52535	30.3968	6.38226	9.30234	4.97149
0.170391	0.0593252	0.0099101	0.0945092					0.0379832			12.117	4.34399	0	5.61755	3.30295	3.81432	23.1694	9.52166	6.88308	4.36904
0.132464	0.180546	0.0491712	0.01065					0.0547127			8.45689	4.81992	0	13.6099	6.34063	2.41662	9.56474	4.70283	3.2985	4.83971
0.0358297	0.0338614	0.0632179	0.0281417					0.0530122			8.50159	4.7442	0	10.0951	6.22024	4.59356	4.38849	0.27	1.93653	3.40388
0.0511064	0.0402822	0.0540084	0.00417308					0.097157			7.88942	4.37518	2.12155	3.77374	7.49811	5.60195	8.12762	5.84577	2.7416	3.4185
0.129029	0.0813783	0.0172348	0.0519174					0.0319274			5.55406	5.41067	1.92054	10.056	7.11401	8.78005	25.058	9.32049	4.20122	3.15192
0.158138	0.00314753	0.0256673	0.112393					0.188559			4.02536	1.61017	0.182001	8.33587	3.80935	8.13831	22.6307	10.4966	1.85027	3.31081
0.044225	0.0562024	0.0686283	0.153192					0.130814			8.43782	6.38442	1.03209	4.60941	5.35229	4.33127	6.70763	9.47851	2.13732	5.94378
0	0.0407473	0.0298832	0.0293324					0.0499134			16.3147	14.0938	0.466216	0.941837	7.67909	1.61969	14.5487	9.49738	2.06583	7.59644
0.0334322	0.0245188	0.129555	0.0276255					0.0187461			7.14896	12.811	0.951867	3.20888	3.4255	3.37705	16.9406	10.0689	3.36829	9.29889
0.0984885	0.0453998	0.0128752	0.0495035					0.0228016			8.58187	5.95663	2.28498	5.59727	4.87015	2.9017	17.1173	4.92965	4.4976	4.17401
0.0760044	0.0249312	0.0406314	0.0451543					0.0040775			11.2585	2.61424	0	5.46145	6.2645	2.33822	19.1221	5.67392	3.22483	2.91507
0.0800033	0.271168	0.0035195	0.0589487					0.00553274			8.72031	3.53019	0	4.50808	5.56141	6.86501	18.6172	5.64402	13.0079	3.72763
0.0596442	0.188052	0.0175454	0.0769287					0.0214852			7.00853	5.38672	0	2.06303	10.317	6.78591	2.63961	4.43902	7.27673	5.17473
0.290234	0.0239531	0.0698117	0.00584881					0.0665675			3.39211	4.93659	1.79224	2.326	6.70245	4.20661	7.48445	5.86332	2.34824	5.55072
0.163742	0.0687908	0.107818	0.0828677					0.0455685			12.3439	2.72349	1.19166	6.16603	2.76767	2.77753	15.3743	3.06943	2.98736	9.64099
0.00926914	0.0428684	0.0456112	0.00914202					0.248015			13.6901	3.9602	0.453722	6.50631	2.64825	0.773652	19.4591	5.30023	6.47573	15.007
0.017491	0.0204027	0.0701157	0.022028					0.141129			5.59984	3.33001	0	3.66797	4.90569	4.54067	10.4987	8.84336	7.11243	6.24177
0.227392	0.0542886	0.0763785	0.0259443					0.0875016			6.63132	2.77543	0.364441	1.75533	5.92033	0.540173	24.5022	5.18121	9.77449	10.31
0.00178728	0.0454882	0.0311272	0.0132311					0.0660018			6.87058	11.9492	0.867339	1.73883	1.84535	4.7311	24.172	2.12435	11.6146	9.09278
0.166797	0.0700117	0.0107913	0.0627995					0.0515626			5.72802	8.58905	0.422232	2.30089	5.07901	8.45808	8.64962	7.20858	8.50774	2.96212
0.268144	0.0837492	0.112403	0.0135614					0.166203			5.74072	4.61582	0.893638	3.44693	6.68708	7.21656	1.635	15.779	4.42995	1.58174
0.0340331	0.0357286	0.0523115	0.0125103					0.197667			11.1894	0.654295	1.02304	5.4531	3.16559	5.03512	16.2948	20.5499	2.49996	4.87852
0.118051	0.0748095	0.00763428	0.0747616					0.0444159			18.0395	5.18774	0.676283	7.19401	3.52523	5.35691	17.1839	14.5149	4.74967	10.8479
0.0651987	0.00456352	0.0321938	0.0655974					0.0753181			15.905	3.19389	2.2673	4.46606	3.13699	4.96812	9.82253	14.1294	7.29961	5.67313
0.308715	0.0398431	0.0560239	0.0991465					0.0468343			8.47242	3.67321	0.636162	1.9818	2.14284	4.07311	7.0241	13.5771	4.65808	2.64591
0.0295235	0.117396	0.0286424	0.022296					0.126997			8.42826	6.26451	0	6.61152	2.46126	3.48249	15.1024	5.84111	5.19337	0.782864
0	0.0378156	0.02834	0.0159946					0.00977866			11.075	6.17465	0	9.33117	4.27388	3.00879	17.9618	6.9674	3.65883	2.49288
0.1615	0.106422	0.0614985	0.0664798					0.0901229			13.7423	6.22331	0	3.29139	7.7114	3.19982	10.0302	1.7887	3.86728	4.04036
0.0651161	0.0680957	0.179252	0.0197262					0.0052079			13.3761	4.48975	0	8.35475	5.05679	1.38046	5.92689	10.2073	5.0238	6.81141
0.0571183	0.142213	0.070364	0.011949					0.0761457			6.37277	5.02853	0	13.9304	3.82366	2.97227	2.07788	9.83164	3.61374	17.8101
0.00912921	0.202397	0.00320837	0.0157846					0.0649638			6.12856	6.23402	0	9.94971	6.13922	3.83021	3.36902	4.25074	2.77692	10.4591
0.0157301	0.323059	0.0319668	0.0652144					0.161377			4.69711	4.53478	0	3.61413	3.51923	0.660807	4.46881	2.14987	3.23234	6.99508
0.0715661	0.101412	0.00994075	0.0140314					0.00725792			3.85489	0.935927	0	3.23473	5.36564	3.26271	3.73954	3.55504	6.40156	6.09799
0.105915	0.043618	0.0381283	0.0283594					0.23725			16.3453	1.59934	0.951429	3.02362	5.26382	3.17501	4.13224	4.04277	5.45748	5.3497
0.0869516	0.0926058	0.0483792	0.167604					0.146244			12.9828	2.05723	0.471407	3.0243	1.81563	7.37526	5.56215	2.87983	6.07443	4.2224
0.149708	0.0286088	0.0737117	0.0229575					0.0862782			6.01782	2.15517	3.48387	2.38857	5.3189	11.4639	10.9217	2.80383	3.96318	6.77094
0.0128677	0.037129	0.0196102	0.0711076					0.0462943			6.73603	2.57859	1.97783	0.350467	9.90649	2.34359	9.36275	9.87332	2.68677	12.652
0.320637	0.00589421	0.0322608	0.0827895					0.292361			15.0211	3.46224	2.78703	0.529893	6.68447	2.45607	4.3592	12.7299	2.62288	16.076
0.00602582	0.227835	0.0900752	0.0144399					0.0716473			20.3297	2.9701	1.93593	1.51837	3.69272	4.6752	0.808661	10.376	2.36308	11.9473
0.0302	0.0302505	0.0432105	0.0326727					0.0525008			21.3284	2.167	5.30272	3.83744	6.36299	2.24177	3.76993	9.32154	4.96802	5.1948
0.0671621	0.0891494	0.245853	0.0190863					0.050493			15.8115	3.33426	5.18436	3.58716	10.1198	9.28891	3.40619	6.68197	7.11529	3.57938
0.0164832	0.000942813	0.0479429	0.0164451					0.104456			3.86359	5.03632	8.6644	3.87926	11.6441	11.3082	0.613758	2.73761	5.85285	3.23983
0.024258	0.103089	0.00543872	0.152327					0.00970292			7.20922	8.99152	7.62241	7.08996	9.69042	6.69715	4.14026	0.594158	3.50147	1.87017
0.0425235	0.089473	0.0275679	0.0220072					0.0534136			10.0783	13.9571	4.97615	10.1521	5.50016	5.80451	5.01123	10.3297	2.23156	1.43077
0.02583	0.0733313	0.0155538	0.147656					0.0364093			8.20269	6.86339	3.49401	6.78094	1.93932	7.10891	5.95792	10.2762	3.05419	0.929665
0.111451	0.0331945	0.00838401	0.0889017					0.152487			16.3125	4.54055	4.94917	2.6956	6.80349	12.7448	5.88469	10.2721	4.85517	3.97243
0.131616	0.0177544	0.0499047	0.0175883					0.265802			17.5648	1.58934	3.35413	0.750787	6.3288	8.00141	4.75861	8.07886	3.05183	7.63213
0.0243453	0.0981545	0.00525665	0.0270219					0.265448			15.6187	2.1695	5.88969	3.14702	5.66507	3.20332	3.45988	5.23799	3.56931	23.4167
0.085488	0.0248729	0.0262455	0.0413817					0.09253			11.6085	5.71491	8.04991	4.63745	5.12868	8.53015	1.21327	5.45718	1.48375	20.7376
0.0179249	0.17152	0.0278193	0.0252939					0.0513988			4.05298	12.6236	9.31336	6.7282	4.7526	8.2035	0.719658	6.68094	2.97983	19.1971
0.302463	0.0855936	0.045695	0.0460953					0.166438			7.8126	13.9281	9.57616	6.07868	0.98519	2.19277	4.99887	6.64047	3.14518	19.3105
0.242077	0.193622	0.193254	0.0319816					0.0439579			5.3488	9.55454	7.35765	4.50601	5.32605	7.55087	9.2095	4.10912	2.2867	17.1327
0.0523015	0.0841909	0.124368	0.0260792					0.0776147			8.24785	2.73555	2.76545	1.80793	10.138	15.1399	5.97876	1.48972	2.73009	13.6405
0.0163548	0.0911094	0.233706	0.0483331					0.0565808			21.3022	2.53464	4.06458	2.20523	10.3335	11.7573	1.40713	4.96826	2.32424	7.38961
0.0333636	0.0184632	0.223339	0.0586468					0.00746076			14.3252	4.82252	7.18756	4.76717	9.79517	2.65087	2.13314	3.23031	2.11036	2.85088
0.0159032	0.00501328	0.017693	0.027892					0.090684			10.0983	6.34105	4.54596	4.26574	9.14755	7.14988	2.52059	3.44658	2.55464	10.1148
0.145051	0.0410056	0.0153337	0.0178843					0.0969631			4.89703	5.70373	2.79566	3.19304	5.88455	3.8125	6.77676	6.42593	3.14424	11.6007
0.105506	0.00147587	0.0304402	0.0208197					0.15421			7.57984	3.32992	3.99108	4.65324	5.11119	1.37778	6.71066	11.811	7.03538	11.6239
0.024045	0.0202878	0.0495141	0.0326973					0.178368			11.1681	1.03675	3.26048	5.76931	2.23072	1.94002	3.71113	15.4627	10.3112	12.0616
0.299563	0.0658896	0.021623	0.0682698					0.107664			10.0998	5.02103	1.14481	4.2729	2.64191	3.12266	4.89125	12.7057	10.739	10.6138
0.022846	0.0398168	0.0309822	0.164265					0.0921137			6.12915	8.92187	5.61767	2.74662	5.12983	2.76644	6.06299	6.68257	8.53553	7.30143
0.122278	0.140147	0.00590704	0.0806225					0.0997225			5.30293	7.3579	7.75932	4.45973	8.61462	3.25625	5.18757	5.31545	5.21269	5.49213
0.0915743	0.149766	0.135493	0.0417644					0.191329			3.08718	5.47165	5.94596	5.11606	10.5294	3.12359	4.60703	5.09125	3.81236	6.91997
0.166194	0.0584026	0.0444177	0.0360009					0.194651			1.7801	2.94546	2.96573	3.23162	9.81679	4.16599	5.52016	6.15963	5.70442	9.89028
0.0321578	0.00120934	0.0322174	0.011984					0.0697231			3.97621	2.72552	0.524444	2.03639	7.85876	4.08118	5.0631	5.6837	1.9416	13.2323
0.189506	0.0304079	0.0361582						0.186442			5.54497	4.82368	1.76509	0.272723	5.05387	7.28177	1.07134	1.51631	3.73257	16.0172
0.0945815	0.075148	0.0652414						0.0508451			4.60527	1.22342	3.50291	3.14021	2.23455	7.78974	2.10544	3.81967	5.74566	11.1688
0.173908	0.0212695	0.099073						0.0494118			2.60116	5.68296	5.71172	4.22619	22.1019	6.14493	2.13889	4.87302	4.94877	2.33107
0.0609947	0.0118602	0.0840206						0.0141924			1.77423	10.0592	8.14905	1.64106	4.11191	2.67548	7.58519	12.0021	3.98442	16.3608
0.0380246	0.100264	0.0341439						0.026348			2.64749	12.4785	9.13621	1.04276	4.24555	12.6187	8.44259	14.5377	7.40411	15.6271
0.024825	0.0629148	0.0247946						0.0283527			2.80569	12.5518	8.30049	2.47732	15.2782	13.6204	4.28975	6.06417	8.48658	12.5499
0.0201894	0.156484	0.0329628						0.0367641			3.67179	8.74802	6.58867	5.68644	17.5979	7.47213	7.30937	7.22398	8.43441	9.06318
0.0343059	0.0812596	0.0280195						0.139656			2.82706	3.47522	5.55747	7.12923	8.50301	2.47793	6.7739	11.9937	8.07879	7.71664
0.326604	0.0518827	0.0573414						0.0149163			1.18088	0.494644	6.97336	6.17231	13.0765	8.15372	2.07459	9.27459	6.21497	8.63809
0.0175084	0.0117907	0.0427033						0.100888			3.29935	4.11181	8.71143	4.41896	24.2739	9.13178	2.62104	4.34564	6.01492	10.6116
0.16263	0.0661442	0.0362722						0.0478546			4.32545	7.51404	8.15975	3.24514	31.9471	10.915	4.59149	1.56165	6.47706	10.6445
0.204885	0	0.0312556						0.0805809			1.595	9.56812	5.09186	2.17905	32.8483	10.7939	2.5411	4.80484	7.02412	9.29204
0.0282928	0.00867846	0.0529752						0.0315943			6.2244	9.01549	0.884464	0.670645	3.33878	7.94547	2.30165	10.8796	6.36835	9.93009
0.00577294	0.0412075	0.053218						0.0599595			7.35299	8.47855	2.03736	2.79135	2.19154	3.24895	6.29549	12.0953	5.02809	10.1684
0.0754524	0.00378848	0.274283						0.0234307			6.24514	7.42512	4.2885	3.03972	9.15758	2.59373	6.35898	8.61738	3.98973	8.35237
0.0329862	0.015544	0.00540271						0.133894			4.97787	5.64746	5.05663	1.43666	14.1952	6.73317	5.73881	4.69826	3.61507	8.87485
0.0793904	0.0409659	0.0134175						0.0188965			3.39398	4.37086	2.11929	5.31813	13.3535	2.42255	7.67875	6.78049	1.6742	7.88821
0.0659387	0.011461	0.170599						0.0766025			4.28187	2.96167	2.84323	7.4071	6.18724	6.15765	5.27168	6.08699	0.9264	10.3051
0.0439663	0.0178348	0.00681176						0.233986			4.92905	3.33945	3.73337	9.63869	7.05398	2.5568	1.50414	4.28873	2.40064	15.423
0.137715	0.357586	0.0346936						0.269344			4.61566	2.87406	3.33794	1.92556	18.2047	2.64537	3.73978	4.296	2.64832	4.39653
0.04625	0.0283124	0.00175624						0.0637782			17.9175	1.90377	2.42848	1.95114	15.8781	6.34096	5.62694	0.941823	3.21552	2.63224
0.0196514	0.138543	0.0758552						0.24735			23.2748	2.38498	1.88951	4.63796	6.22119	4.32418	2.61192	0.921277	2.98887	1.07827
0.0339378	0.047478	0.0558527						0.081025			28.4648	0.895173	0.643242	3.10057	8.04815	1.54209	4.20851	2.83271	2.20739	0.876449
0.0490094	0.00886494	0.0584167						0.155779			26.5948	0.662918	1.36655	4.44881	7.85017	3.39864	4.22563	3.81631	1.77381	3.38469
0.167223	0.141035	0.011026						0.11499			20.3013	0.794982	1.13823	12.1509	12.2729	0.603584	3.4939	1.51749	0.64714	4.35956
0.10611	0.0997297	0.025513						0.0352304			20.02	0.814958	3.8946	13.5553	20.6746	3.22574	2.07805	2.4232	3.8626	2.30515
0.014081	0.0928989	0.00831166						0.0391673			17.6204	2.01967	4.76991	7.64571	20.2612	7.43015	2.48253	6.05208	4.32248	2.53898
0.027538	0.0326878	0.0364705						0.0393533			16.1925	1.71048	3.34268	1.64087	8.65687	8.8811	3.73948	5.95389	4.53706	2.85638
0.0865682	0.0428477	0.00461565						0.121943			17.5258	2.05071	4.0118	5.67355	13.5025	2.3701	1.77826	2.84437	5.30293	3.94852
0.132994	0.0440108	0.0625283						0.013909			18.2031	4.36049	5.04447	4.83321	28.9935	6.11426	1.84131	4.09049	5.00301	11.627
0.0417819	0.0716093	0.0387676						0.202254			15.9878	2.99343	5.77206	1.85826	5.42303	4.91125	1.47001	5.46492	4.7958	8.70662
0.0835653	0.0285827	0.0686581						0.159903			13.9977	2.86398	4.64707	3.16608	3.11053	2.84235	2.08118	3.21231	4.4	5.62841
0.0244545	0.0442711	0.0557985						0.126848			12.7885	3.38736	2.38128	3.39467	6.70057	5.11029	2.84027	1.66939	5.60215	8.01338
0.0155859	0.00300845	0.0742478						0.0730707			10.6351	5.13716	5.91944	0.113144	6.37328	1.20406	1.86868	2.59939	9.27585	8.84674
0.0193385	0.00794533	0.0539338						0.145001			9.96125	6.53018	8.43453	3.07112	3.82059	9.84327	4.40884	2.67059	12.61	6.17825
0.0198028	0.00120934	0.0988576						0.0235222			10.5912	9.69168	9.14017	3.3645	2.73166	3.90941	5.9238	4.75886	14.2973	10.3441
0.16421	0.00299662	0.106004						0.178928			9.33922	10.1146	0.967833	2.25081	2.78886	2.14627	5.4223	3.47091	11.985	16.3321
0.0628881	0.0475963	0.00735939						0.0932042			6.44312	8.78727	6.86244	3.73533	4.23083	7.13886	0.883357	0.95332	8.44449	10.3157
0.0623054	0.030633	0.0170964						0.276432			3.37338	6.00431	11.0249	7.88763	4.04449	10.0114	3.5201	1.52877	9.74593	15.5874
0.0277809	0.0517156	0.13567						0.096169			2.80565	3.32076	6.93729	5.93286	3.24109	9.05276	5.83088	4.52509	14.4869	13.2768
0.159556	0.00439349	0.0211353						0.223514			2.17481	4.05214	1.98383	0.877222	4.18235	5.19882	5.85248	8.90528	15.8463	9.64966
0.0887135	0.0400082	0.0329746						0.00732625			5.89624	5.30728	4.35586	3.90172	4.28538	2.68865	2.91997	11.1836	14.1757	6.84188
0.139085	0.127607	0.0806755						0.0738198			7.46082	3.12026	3.64853	1.41347	3.40455	2.88711	3.52922	17.9045	10.2442	1.9591
0.0699038	0.0191593	0.114034						0.114007			9.89439	0.775304	6.9356	3.61299	4.49654	1.32365	5.03159	16.1115	6.8674	2.54407
0.123406	0.0176506	0.110815						0.0586207			12.3042	2.79896	9.0501	6.26497	3.49299	4.71889	6.60894	7.99549	5.94265	2.24735
0.184392	0.0147738	0.00887832						0.0542976			11.4775	3.36762	10.8483	8.52864	3.74337	8.52038	7.38048	3.39203	7.43396	1.93132
0.0376078	0.0178165	0.0484199						0.219011			8.26925	2.73093	17.0295	10.6507	4.67321	8.19788	6.05548	5.36376	10.0611	6.67506
0.084438	0.00257914	0.0121312						0.0460975			3.99658	3.3026	18.401	8.47587	2.36918	3.8839	2.30087	4.62458	11.8535	8.59298
0.166706	0.00448757	0.0241306						0.142391			2.95048	5.22831	15.4111	2.98676	1.55541	1.33141	0.864173	8.33692	12.8689	3.29499
0.0323316	0.0417825	0.031127						0.0465669			4.23561	7.1609	13.121	3.22675	4.50879	3.20662	1.13205	10.842	13.1801	8.82023
0.179334	0.0349493	0.00275757						0.119806			6.28448	6.97884	9.5881	3.47419	5.37976	3.7522	3.65773	12.6343	8.34071	13.9035
0.148617	0.0316075	0.00730408						0.122463			8.47178	4.40585	7.88597	5.08598	5.58734	2.07549	1.78028	21.4261	6.06541	16.5078
0.236813	0.0122413	0.108668						0.0214379			20.2117	2.11257	8.27168	4.35652	4.14714	1.10985	1.73574	3.14641	5.38503	17.1885
0.0147756	0.214881	0.172617						0.21803			17.3212	3.63825	8.18407	1.96043	0.543475	2.38332	2.16456	3.04542	5.77405	12.2712
0.138299	0.00841815	0.134373						0.0602711			11.9697	10.6551	6.12712	7.47343	4.17078	3.20598	1.42756	5.99862	5.21138	6.34267
0.139579	0.205543	0.0514028						0.0702571			11.0039	12.1468	3.04672	6.23469	4.67446	3.54687	1.93646	7.02252	4.1946	6.01992
0.0713074	0.12276	0.0263273						0.212854			14.6844	4.00085	1.35596	0.826478	1.66583	3.7568	2.29217	8.39478	3.24434	9.10836
0.198658	0.0646433	0.0773852						0.0934532			18.9628	12.5774	3.05489	8.77681	0.891897	4.75944	1.88446	7.20972	2.42687	10.228
0.0429192	0.0185945	0.0767461						0.128468			5.92838	5.44939	6.59907	11.0653	0.200889	3.99137	5.04875	8.47487	2.03188	9.24896
0.0104033	0	0.0126094						0.250297			10.4821	1.24259	7.13605	9.10515	3.38588	4.55285	7.74178	14.4442	1.07899	4.34978
0.0323824	0.0744162	0.0476474						0.0493894			12.9034	2.72516	3.52194	5.45987	4.91965	5.42647	6.9925	17.9376	1.74794	7.43441
0.0430072	0.047109	0.0345018						0.152248			2.62212	3.2824	1.56022	8.77127	4.42961	4.08372	5.69971	11.3402	3.01196	3.4237
0.0253702	0.0117458	0.0817123						0.0155328			4.41416	2.07485	4.31035	3.73287	2.7046	2.44127	4.47084	0.939879	4.43029	6.43793
0.142772	0.00517432	0.0917909						0.290058			2.14525	1.25713	4.11222	3.74042	1.36492	1.24325	1.64021	5.99052	6.53197	9.55424
0.0943747	0.02493	0.0942796						0.10375			14.7053	2.32015	7.69436	3.24822	13.8997	3.61777	2.62633	4.74474	7.36574	10.8406
0.492507	0.0278025	0.0883992						0.0554977			6.78295	0.857958	10.7641	2.92542	9.02877	6.22349	1.47343	2.17541	6.37329	15.8685
0.17905	0.0964614	0.0277813						0.143555			4.51426	1.68242	11.566	4.69458	5.92226	3.96882	4.02046	3.17305	5.08841	18.4523
0.0547151	0.0288345	0.0269231						0.0905685			6.09014	2.1506	8.80566	5.79876	4.02171	0.480036	3.80395	5.33762	5.14187	11.9662
0.0135275	0.00518423	0.050399						0.0593287			5.99643	3.55489	3.69419	6.90731	2.92452	10.6094	1.64175	5.44847	5.78131	5.36062
0.0157716	0.120942	0.0146146						0.260301			8.00395	3.61708	0.573678	7.73959	2.63707	5.57408	1.10076	5.48438	5.67992	19.783
0.184746	0.0547456	0.107703						0.0648043			7.1625	6.29847	3.54066	7.98025	3.73466	7.76325	1.19942	7.15898	3.99764	19.4751
0.0132381	0.0727665	0.0875743						0.0197951			5.61335	7.81753	4.70717	7.8208	4.03203	5.51035	3.95741	6.42662	1.8644	10.2368
0.0783786	0.280535	0.0519246						0.166315			5.70712	7.40467	4.92268	11.2715	4.06641	3.15282	4.68861	1.99397	2.84703	10.7886
0.0171668	0.213696	0.0247781						0.0482484			8.34794	4.44837	4.89034	12.0725	6.13175	4.78232	4.52617	0.603346	3.42077	7.17464
0.341026	0.277897	0.132358						0.0555607			11.6629	3.19307	5.56645	8.9114	7.29988	8.6809	6.69554	2.93782	1.51604	0.775911
0.36553	0.0159132	0.10282						0.0923001			9.33357	3.50276	6.58252	4.41156	6.8201	5.64225	10.4451	3.4893	1.38073	6.69059
0.107101	0.0309543	0.0232689						0.0134949			14.9421	4.55277	3.86737	6.59607	6.6426	3.07	8.65126	5.78641	2.10406	6.8715
0.235712	0.0113091	0.0537161						0.0264064			23.5374	7.82228	2.19252	6.17204	5.59136	1.29336	6.01287	2.13977	2.28539	6.21953
0.114892	0.0880992	0.00883134						0.0693063			28.0461	10.7905	3.66225	4.45406	3.92025	2.19046	5.44442	1.13548	2.92615	11.6128
0.569061	0.078752	0.0190743						0.0812294			25.6741	9.28481	5.24757	4.9373	3.07763	4.06571	3.30933	1.02465	3.92548	15.6672
0.13296	0.0673507	0.0732707						0.038568			6.20954	3.26464	8.64508	7.11851	2.12559	3.0625	1.82886	0.970002	5.90026	13.6835
0.130141	0.101424	0.071755						0.0119971			8.11275	1.97286	9.54414	8.56014	5.93264	1.90926	3.12938	10.4129	7.86311	11.3698
0.0742691	0.224793	0.0119827						0.0444011			7.26184	6.29122	10.7906	7.07121	9.3204	1.7279	3.39815	10.2138	8.57164	19.258
0.0385038	0.10991	0.0856517						0.127413			4.732	9.62168	10.5842	3.6247	7.58098	1.56549	2.39186	7.99271	8.32184	11.8188
0.0289098	0.187241	0.0451846						0.0723446			4.75224	6.8813	5.01499	7.3057	4.53471	1.56059	5.13698	6.57232	8.53823	15.0671
0.02599	0.0109311	0.0103381						0.0792194			6.44729	3.17571	4.05028	5.26699	2.53801	1.48968	4.73762	5.30162	9.83841	19.7277
0.17064	0.0126678	0.0980931						0.169301			10.3836	3.37398	8.01901	9.70401	2.51433	1.08426	3.47922	4.14162	10.6833	21.9085
0.0281692	0.0167776	0.197996						0.280485			12.3227	1.90508	7.34686	5.75951	1.65338	2.52065	5.72653	4.38743	9.89607	23.0876
0.289645	0.0197562	0.0151591						0.215939			11.4889	0.129111	5.38509	3.37182	1.84594	2.95539	2.96379	3.81156	2.84253	23.3605
0.0412698	0.31495	0.126754						0.0950781			9.33041	1.9081	4.56856	4.20163	1.95562	1.94041	5.86758	2.12838	2.20325	23.5176
0.0581522	0.0745358	0.0268493						0.0828083			12.3424	5.41475	4.45946	4.95974	2.17293	5.35052	0.970132	5.62889	1.60528	24.4582
0.0996283	0.056804	0.00762268						0.0612948			12.0158	5.78682	6.10619	6.95037	3.05404	2.43375	4.03648	11.127	1.10238	25.9002
0.00860626	0.0405626	0.116334						0.0512405			14.146	5.33465	6.25108	11.1166	3.60159	2.26122	6.65408	3.29671	1.13387	24.9406
0.0663367	0.0664247	0.0501184						0.0356032			15.1746	4.21656	15.7799	10.8655	4.66293	1.66002	3.34799	7.21478	1.03551	19.7717
0.056907	0.0591774	0.207163						0.0865739			15.8571	1.74605	14.1591	9.79833	7.1656	5.08999	2.65751	9.03276	0.954033	12.8773
0.0113917	0.0992427	0.00890324						0.0661775			15.7274	3.20537	8.82441	8.68267	8.87211	6.74125	4.94506	8.29841	1.82369	7.75476
0.0463188	0.14606	0.0187563						0.118876			12.7287	2.61247	7.21905	5.33712	8.74887	4.00944	7.22604	4.74962	3.01529	6.30708
0.0205481	0.0161834	0.090171						0.0194889			27.438	3.71662	6.7948	3.28095	6.99512	1.82173	7.7605	4.61948	4.03478	6.96846
0.0145435	0.0435528	0.135216						0.105125			28.9211	4.41032	6.20614	5.17909	5.16223	2.87086	5.48393	4.63031	5.26181	6.51602
0.0940276	0.0443947	0.0533286						0.0234468			24.7143	12.4104	7.88115	15.2635	3.65401	2.34927	4.0449	6.14494	6.91203	5.69526
0.152484	0.0485765	0.0620919						0.0260566			17.7213	6.79885	3.10361	3.20604	5.44571	3.05591	0.758565	7.35162	7.45181	7.82727
0.0544795	0.0574833	0.136572						0.0487333			3.41595	2.38064	2.86438	1.76371	6.29245	5.25197	2.61574	10.113	6.44756	17.1287
0.0138001	0.031655	0.0802135						0.0126009			2.9358	5.95415	7.06308	3.00217	4.51118	3.97828	1.99083	9.91997	6.24535	13.9918
0.0572083	0.033257	0.0297358						0.131555			4.98613	8.73501	9.49039	3.80221	3.00597	2.65036	4.5034	8.53125	7.34913	7.49111
0.0078436	0.0191573	0.131443						0.0806771			8.31104	5.42256	11.8992	1.35075	2.03328	4.01027	6.50764	7.70017	7.00733	4.74658
0.108493	0.0071309	0.0589955						0.250282			3.69703	3.56893	13.3669	1.88333	0.4091	5.68213	6.19037	9.73485	4.01553	4.53037
0.0472094	0.089181	0.0219594						0.302037			4.17513	6.32859	8.08944	1.75799	0.772881	8.48909	3.61754	9.01445	1.27777	9.27363
0.0482814	0.112045	0.136189						0.0780135			2.83192	9.06811	2.81041	0.550175	0.556274	6.92587	0.972185	8.72166	2.61277	12.65
0.0626706	0.0454988	0.00833084						0.10597			4.07104	9.12204	2.68157	1.45394	1.52882	2.89507	2.29575	8.91943	5.35536	15.3725
0.0445461	0.055928	0.0715492						0.0328431			7.07226	4.19785	3.66287	3.76177	1.59821	1.15186	5.24345	13.8328	5.38868	8.99272
0.128049	0.0530046	0.0209919						0.0709067			7.93884	1.75308	1.83286	7.51389	1.59146	1.72153	4.41499	19.993	4.03336	5.94755
0.0352137	0.121056	0.00562496						0.0141875			8.39969	3.27809	0.791392	9.47024	1.01852	4.60547	0.509953	25.4342	4.43845	5.2025
0.0306615	0.0384325	0.0298115						0.119925			7.12484	2.479	4.89711	7.71995	2.93868	8.56864	6.18692	24.7107	5.74072	9.86766
0.0488095	0.0431506	0.108098						0.155437			1.73541	2.50907	6.93734	3.89074	6.06632	9.58046	8.45893	15.3822	5.41853	14.7113
0.125788	0.0679681	0.0251732						0.042014			11.986	7.12372	1.01555	0.817792	7.19483	6.06754	3.5647	4.73505	5.12986	21.6086
0.153275	0.254422	0.0779201						0.0157079			5.90348	13.5053	10.9876	0.774464	6.05567	2.53569	3.3238	4.75452	6.31373	16.381
0.426702	0.0125906	0.0253764						0.0604843			4.22825	12.0751	15.4564	2.70681	4.98361	3.37131	3.37489	4.45223	7.60205	16.7357
0.0246966	0.028768	0.0657365						0.00405358			5.08838	5.92293	13.8175	4.01475	2.31258	3.29821	3.08611	7.53223	7.38191	15.7772
0.180372	0.107525	0.0340721						0.0521389			6.89342	7.02828	6.09788	4.19683	10.2566	2.46928	1.88079	5.69669	6.74916	1.91751
0.283506	0.0524869	0.0179788						0.0905768			7.92491	3.01545	0.809885	3.58582	2.52238	1.98139	1.14359	5.44953	7.56638	7.27092
0.121936	0.0691574	0.00327577						0.150761			8.91363	6.43067	2.67837	1.38393	5.07994	2.58259	1.3717	4.91602	8.63527	11.5584
0.16263	0.0830218	0.00954127						0.267951			9.7923	5.47822	2.34564	0.793088	3.07446	3.74109	1.72657	7.63036	6.77948	11.5583
0.131825	0.0581373	0.0436368						0.0265354			9.31346	16.7516	2.80559	2.37177	5.25231	5.32471	3.37316	9.13417	3.71826	11.8151
0.0552679	0.15687	0.0678935						0.0735525			8.17092	16.709	11.3683	5.3301	7.80395	4.35496	5.03956	9.53725	4.02798	11.5683
0.0472416	0.0124673	0.2446						0.0792648			7.49831	18.9451	16.1762	2.06025	9.31767	1.48562	2.5166	8.19647	4.53542	6.30079
0.238405	0.0590588	0.0315516						0.0208953			8.52194	20.574	17.5974	6.5376	12.4999	1.78235	1.20221	4.62731	3.97276	10.1399
0.0101369	0.156709	0.114749						0.050019			7.63017	8.50825	14.3439	9.27623	15.3278	2.40019	3.04451	3.39251	2.86821	2.22477
0.0176266	0.204823	0.186674						0.125197			3.47909	13.7221	1.84838	7.47185	12.2299	2.72438	3.32181	2.24648	3.57782	4.13344
0.105804	0.14428	0.100417						0.0478167			16.6884	26.4198	3.23243	4.24181	3.36339	3.79032	4.05647	2.65619	5.00511	6.37492
0.0144124	0.0584486	0.000432497						0.098547			15.2124	22.323	4.24097	1.26319	5.24847	1.23464	4.46269	6.06845	4.72777	3.71652
0.023759	0.122501	0.0366254						0.0631599			12.9907	13.301	6.44759	2.55874	3.79864	5.1448	2.12981	8.85847	3.32286	2.7856
0.0151647	0.12682	0.114678						0.0914135			1.01872	6.27586	8.12893	5.6234	1.56238	8.98161	1.26354	2.78935	2.2905	4.22897
0.0293602	0.0231792	0.0112994						0.10525			5.00459	2.32378	5.23845	13.3259	3.39982	7.92774	2.84187	9.21135	1.58238	4.84644
0.130273	0.029992	0.0107757						0.0738177			2.17841	10.6069	4.43278	20.4654	5.67397	4.44103	2.7257	12.3448	1.26325	5.11775
0.0587886	0.0257703	0.0142384						0.0171779			4.71159	11.7976	2.32362	19.2674	5.16148	0.771686	2.46696	11.8499	3.22822	13.5859
0.30821	0.0175105	0.00741632						0.0516836			7.27182	7.81761	2.82425	11.3893	2.83488	1.82788	1.48466	12.5209	6.38718	26.5264
0.097691	0.0199257	0.132027						0.0792661			6.93091	7.83697	3.60005	5.41632	3.06093	3.0029	2.24196	11.8837	9.95049	9.60949
0.367206	0.0173011	0.0104711						0.0326016			4.98326	9.87099	5.04651	5.71041	6.25421	2.30545	5.28919	7.46795	12.2098	9.90875
0.0166528	0.415747	0.0782496						0.0538149			4.98907	7.02449	7.48332	4.37423	7.00019	2.24717	7.83012	2.86444	13.2237	7.89399
0.0325655	0.0162629	0.0625898						0.085273			6.00537	3.92393	3.29063	0.740738	5.47714	2.60089	6.40729	10.4714	14.2575	6.31346
0.341623	0.00829337	0.0284699						0.272194			9.17348	2.43666	3.37593	2.20707	6.78742	2.31459	4.12357	20.5073	12.8913	6.12826
0.0121582	0.121301	0.144026						0.0369878			12.4382	5.16339	2.35277	5.27636	10.3339	2.63623	2.02117	23.9781	10.9385	4.23561
0.0537881	0.0387498	0.00931846						0.0817053			9.3289	7.28737	4.18886	6.87217	8.67586	5.11869	1.83806	22.8748	6.03243	2.65631
0.0105332	0.0316649	0.0151709						0.0323523			14.2901	5.43391	8.75281	6.75581	4.75614	5.76584	1.33811	18.877	8.46181	5.92505
0.174535	0.0601908	0.0619214						0.0693409			13.289	6.00798	11.278	8.77382	8.7477	4.00164	4.90011	12.7117	10.6489	16.1976
0.10836	0.0255931	0.0680663						0.21732			10.3781	7.9367	11.616	5.59731	6.31949	4.20002	5.34008	8.97531	11.5427	9.61094
0.0231447	0.0721734	0.0118281						0.043767			3.66015	5.01291	8.09035	4.12341	3.94487	3.48547	4.7521	8.76257	12.5824	2.79741
0.0204281	0.154938	0.0107312						0.0862395			5.72384	0.704324	3.25475	4.35151	3.09554	4.02832	9.24957	1.16114	12.1087	4.94307
0.0664344	0.0232904	0.0855106						0.0230829			6.10703	1.91996	2.40902	5.19104	4.40448	9.1061	8.90303	2.79739	6.24427	6.97597
0.243363	0.117284	0.0134086						0.0602428			1.28813	1.36344	0.294735	3.91962	5.55944	5.36781	1.73967	4.39215	5.53885	6.21027
0.254183	0.000553411	0.0670056						0.158591			9.55555	2.3803	8.11972	3.19045	5.02679	2.91212	7.3615	6.21802	1.51875	5.55735
0.0530922	0.0178999	0.22456						0.0288312			13.7655	3.28718	5.18481	4.07387	7.44411	6.33211	12.6396	6.30651	2.74897	2.03463
0.0137714	0.10775	0.00785243						0.0451064			8.90847	3.73179	3.66365	5.30199	7.5912	5.94273	12.4924	5.89254	2.33843	4.48826
0.715804	0.118831	0.0436071						0.019981			2.5744	4.11298	4.28089	3.60046	5.59736	4.46329	6.00208	4.11761	11.3354	8.74956
0.227303	0.0299737	0.009899						0.0222621			4.58094	7.12861	4.34246	10.8485	3.31894	4.05218	1.62929	4.09479	22.8894	11.6744
0.087438	0.0636181	0.0137255						0.0433464			5.0569	8.14984	5.92219	10.7088	1.54767	1.71803	3.22914	9.43479	16.8371	12.1129
0.046714	0.0398075	0.13931						0.0480403			11.5642	7.88885	5.90465	5.03765	0.562671	0.538103	6.46195	13.5911	14.0906	10.9443
0.21413	0.051741	0.141674						0.0274334			4.79292	8.4726	4.42049	7.93621	1.02335	0.73759	6.46291	6.86265	11.2287	7.49162
0.0756155	0.0339975	0.06628						0.0617172			4.09088	10.31	2.32873	13.0272	0.149804	1.44284	3.48273	6.74987	7.50442	5.68132
0.0789896	0.0283404	0.131557						0.0208349			4.95197	11.1891	4.0237	9.52892	6.41152	0.773407	2.91949	8.8518	3.38087	10.1992
0.0109829	0.0107691	0.0728341						0.401782			4.06371	6.56289	5.05236	6.43876	2.79289	1.71027	1.73326	3.7597	2.87744	10.8927
0.209873	0.137779	0.101409						0.0604934			2.90195	5.69409	0.978642	5.18126	1.8503	2.36424	2.84188	16.4007	1.35746	6.92035
0.217416	0.103342	0.0660261						0.410904			6.7642	11.712	4.85494	7.34098	1.74441	11.1884	2.68463	19.4429	1.45304	4.79938
0.0701599	0.213998	0.0551528						0.00680317			9.66292	13.0608	4.63476	9.7547	1.53679	12.3465	1.93561	16.373	2.18567	4.61831
0.0132017	0.0701671	0.014655						0.005174			9.32812	6.79326	11.6047	7.62659	4.40307	11.7889	7.60085	10.2759	2.33622	8.09562
0.124167	0.0428446	0.0233111						0.0851261			10.383	9.85535	5.52234	8.26747	4.46857	7.46343	7.80407	10.0962	2.37034	11.2759
0.0961602	0.0353295	0.0115008						0.0966292			11.5853	9.93481	7.30913	12.9135	0.417758	4.84598	2.08586	5.00342	0.34623	7.41685
0.0223243	0.112469	0.0229181						0.0638764			10.1232	6.94387	6.66819	12.6308	4.55536	6.00933	4.60427	7.59413	5.59467	4.34236
0.102309	0.00599882	0.0721133						0.0706275			7.77706	5.56794	4.57649	8.58401	6.57886	2.49313	2.92683	6.10561	9.95168	10.404
0.0218549	0.0999128	0.182516						0.069613			4.36959	11.4665	4.76051	5.91055	5.05116	3.43995	1.48564	3.43673	11.3445	14.3611
0.0332022	0.0789074	0.0354505						0.016846			6.22312	14.631	11.062	11.2361	2.72244	5.348	9.54076	0.986885	14.6205	16.7931
0.104798	0.0243533	0.0295019						0.0358425			7.79956	13.3078	8.07002	11.0902	4.26767	3.03006	9.48828	4.23526	19.8228	16.9385
0.0532722	0.0630647	0.104514						0.324243			6.83815	10.8013	9.66379	6.47994	6.22321	2.05194	6.24468	8.2259	22.3957	13.6369
0.155511	0.0357331	0.0939347						0.225561			11.6992	7.80681	10.9302	9.73457	4.39195	2.10381	7.33775	2.70032	13.1376	8.96548
0.0890682	0.0141975	0.038245						0.168922			6.05778	8.23569	9.5909	6.56125	2.97794	0.706009	9.88861	10.1671	12.761	7.82432
0.450607	0.0817918	0.0345572						0.045092			9.462	7.50085	9.25615	3.68295	6.17949	2.24834	3.49068	7.70322	2.79406	4.98398
0.203578	0.0359228	0.0132306						0.124628			12.9607	5.26095	8.22553	10.2531	4.19803	5.12453	9.05126	5.2031	5.89113	3.83731
0.0660957	0.154203	0.0289129						0.121129			13.2863	7.98889	4.93103	10.5751	8.31136	6.23886	13.5366	6.74717	8.23156	6.38815
0.0727037	0.102737	0.0658461						0.144627			11.9975	10.108	3.89843	5.9477	12.2954	2.99919	14.5116	6.25406	6.02496	13.1388
0.0265633	0.200241	0.160558						0.0929904			15.0163	13.8827	5.05471	6.91134	11.351	0.860077	3.9816	7.42355	2.40306	18.4549
0.176009	0.0199392	0.0556994						0.166446			17.8906	11.908	5.31805	6.19875	5.91528	1.31726	5.94054	6.13029	1.25576	16.9465
0.0281082	0.0485878	0.0297755						0.121197			19.0172	7.15441	7.27612	4.25177	0.671219	1.59301	1.95009	2.26678	2.7153	10.741
0.0112088	0.0130388	0.209075						0.0748463			9.70967	13.2501	5.48915	1.0903	2.59299	0.592167	5.51358	23.8516	5.82735	3.52117
0.100743	0.0489153	0.0357709						0.0622911			7.2817	13.6227	2.94401	4.63812	8.34762	2.95985	4.03061	14.7697	5.85633	11.2481
0.0177604	0.00773999	0.0185473						0.00231662			4.91961	7.13891	4.99463	5.55422	8.69439	3.92418	10.9965	5.21901	2.23858	19.1156
0.238025	0.0355784	0.0257914						0.159045			10.3841	5.51894	10.2817	6.81877	7.37661	5.65165	9.73356	1.56853	1.76091	17.2833
0.138291	0.00976023	0.0510132						0.312179			16.0484	3.11695	14.124	9.77561	7.24598	7.68047	1.27894	4.49315	3.88504	10.143
0.0176869	0.0383692	0.0067574						0.0701893			15.313	4.99866	9.40287	9.76638	6.31969	5.85935	2.05151	8.1244	4.40584	5.71981
0.0203862	0.0234884	0.150628						0.0879402			14.271	5.56988	3.63465	7.07527	3.05998	2.38875	2.78492	2.84614	2.25653	4.78754
0.00675697	0.0262845	0.00806644						0.0552543			15.4766	7.69104	5.79655	11.6367	2.78232	1.48307	7.26915	5.02988	2.92807	4.07145
0.0651175	0.0355677	0.0852179						0.0134527			20.545	10.6254	7.54957	7.3443	6.61398	2.0632	6.57107	8.78799	6.39532	2.98399
0.192916	0.030481	0.121477						0.228913			8.58467	2.31263	2.4901	6.30333	11.644	1.7747	5.98916	5.52302	7.82822	1.43608
0.068862	0.0463005	0.275669						0.138558			17.5503	0.801847	1.8489	6.04111	13.3066	0.938502	7.21576	4.28515	6.61432	7.19383
0.188061	0.00980969	0.0768855						0.233517			23.7632	3.9142	1.4192	4.86512	12.0901	1.51836	8.87851	8.77339	3.82521	12.6398
0.0344855	0.205359	0.0843386						0.0888751			21.9603	4.02492	4.0876	2.33885	11.7087	2.74954	6.25047	14.147	1.36827	12.1953
0.116847	0.00534791	0.0774793						0.00458156			13.8716	2.78373	9.41298	4.67346	9.09554	4.67701	1.50318	17.1689	2.35611	6.84732
0.0108046	0.0868005	0.0746366						0.0610271			8.48679	3.11258	11.378	8.87176	5.77244	6.25156	6.52066	12.854	3.49336	4.42973
0.0432031	0.068988	0.134023						0.0435885			7.16616	3.5389	6.05615	6.23972	5.95993	5.77682	5.829	4.4054	5.07105	1.23523
0.133014	0.0409281	0.0598434						0.0178426			10.6508	2.09135	3.73488	4.59237	5.65244	4.08175	1.65103	5.90579	7.43019	2.53718
0.00786696	0.035617	0.0152737						0.0604902			13.7438	0.545719	9.2248	7.41593	2.65993	4.59284	2.21046	2.9203	9.88252	3.6497
0.00786393	0.0681174	0.0358955						0.37784			12.6801	2.56753	8.7529	10.3848	0.645418	6.39168	4.48746	4.17077	12.367	3.78477
0.0964352	0.0191919	0.0787518						0.0402414			8.80125	3.72024	7.51872	7.6651	1.68078	6.60373	1.38016	6.70519	11.3953	2.65062
0.178469	0.12656	0.119192						0.0861177			4.70676	2.41743	7.58377	5.3896	2.25501	4.1652	7.86096	9.95578	0.547694	1.95402
0.0125127	0.0323042	0.00220886						0.0336993			3.30256	2.93404	6.26219	8.99885	7.51605	1.23907	12.7327	10.0771	0.676513	7.53766
0.0780265	0.0485618	0.043625						0.0194757			6.03342	4.38232	4.09632	13.6516	8.67012	5.2171	12.2073	3.98801	1.73318	13.6236
0.0345092	0.0148318	0.0317245						0.0612103			5.88757	4.44253	2.85104	14.0395	5.33189	6.90236	16.6519	4.74441	2.35	15.5658
0.0155592	0.0324104	0.00665594						0.494499			4.29567	4.71647	5.53035	5.69751	2.82111	4.75524	4.68135	6.72467	1.17687	12.9026
0.0808042	0.0298762	0.0779173						0.00275368			2.45536	4.76824	5.59667	6.72785	8.67102	2.38639	5.32125	5.01997	1.71988	10.1377
0.121023	0.0505821	0.0092673						0.1493			1.30773	4.24545	2.33484	3.96825	8.14867	3.0822	5.57545	6.05947	3.00488	7.52778
0.173265	0.0167817	0.0425485						0.142449			5.04692	3.9089	2.37415	0.78923	1.10558	2.98946	3.29828	7.17015	3.46851	4.6082
0.00926458	0.0175793	0.0216485						0.0737438			10.707	4.26522	5.40511	2.72027	5.15451	1.48924	2.12773	7.14559	4.45897	2.77225
0.13318	0.0266212	0.0105268						0.235595			6.768	4.76929	4.69744	4.42039	4.66036	2.57612	3.44849	14.6407	5.6468	4.93858
0.0538159	0.0913509	0.166684						0.0234953			4.97958	3.00949	2.70603	3.19396	5.50034	2.86442	3.70666	11.2906	6.88641	2.49558
0.00987039	0.0496608	0.00785386						0.138586			7.18738	4.47348	1.26263	5.78203	10.1825	1.92855	3.99485	3.28085	6.23347	8.19938
0.00741798	0.093501	0.289466						0.100041			10.6202	9.24929	1.04298	6.84002	13.6359	1.85249	5.3603	7.26296	4.98074	10.7656
0.0645115	0.0372304	0.156169						0.0932174			10.3493	8.56073	3.15672	4.88572	13.85	0.754878	2.13753	22.6105	4.64529	15.448
0.053226	0.106924	0.0238483						0.0362191			7.06633	4.62889	3.90179	4.65938	13.0296	4.17302	1.39777	5.66521	4.18326	22.0833
0.0302078	0.156229	0.0429105						0.214317			2.79327	3.37814	1.65937	7.26834	8.89959	8.5954	6.14485	4.81978	2.50717	27.0818
0.090013	0.0077532	0.02354						0.0052844			1.25023	3.7658	3.01562	2.18736	0.885694	5.42349	9.49457	5.36066	0.604672	29.0808
0.0184405	0.0334526	0.0453337						0.0718702			1.19232	3.09639	6.1057	3.64209	8.00301	2.91538	11.0111	6.65161	1.4063	26.8762
0.160211	0.103011	0.0159636						0.0540742			3.0404	1.65691	5.68534	7.61559	10.3549	6.00077	8.08284	11.1563	2.1654	20.9229
0.192471	0.00619504	0.167849						0.149175			5.74704	2.51953	3.85706	9.48174	8.03329	10.6968	1.28634	11.7826	1.64487	17.877
0.00223267	0.102062	0.00515782									7.34572	4.64352	6.84835	8.86741	10.8606	6.63109	5.77313	6.85605	2.65684	18.5581
0.018623	0.0428655	0.012092									9.07217	3.85674	12.1676	4.71214	9.91322	1.27115	7.92586	8.00488	3.9843	16.9646
0.263485	0.051333	0.0361656									11.7796	3.13947	13.75	2.94229	3.8863	5.00167	4.65778	9.03782	3.33414	13.2486
0.0302974	0.14197	0.0217458									12.9195	3.72793	10.0872	7.68697	20.228	4.66499	1.1335	8.89292	3.1478	4.89741
0.319369	0.0256526	0.0201295									10.1058	6.60848	3.52603	5.68799	16.636	3.3212	4.49511	6.00726	4.20228	7.43377
0.0326431	0.079362	0.0053332									5.38008	9.67353	2.4322	5.3851	9.10203	2.28689	6.85525	1.99471	4.90037	10.5186
0.0233287	0.0274312	0.0225207									10.4395	7.29732	8.04657	3.09555	3.62044	5.79196	6.16917	2.15767	7.83445	13.347
0.101312	0.08642	0.140675									11.4891	4.53351	4.44447	2.70184	5.34626	5.74227	3.6759	5.17776	12.3162	14.5431
0.523481	0.117904	0.0377397									6.78478	1.82588	6.5249	6.31824	8.37167	2.23172	2.3371	10.5156	2.71815	13.2092
0.0478409	0.0680788	0.132048									2.65964	2.98774	4.8134	2.70174	10.8275	4.01906	2.54259	8.80365	5.91986	10.6562
0.339408	0.104548	0.0251058									3.52111	3.3237	4.62105	6.5285	8.1994	2.72507	6.49327	9.35303	4.62132	9.24993
0.197868	0.0691095	0.0403798									7.50747	2.02614	3.50138	6.6437	1.68342	2.63883	6.81021	5.43483	1.08994	9.94135
0.0329952	0.0348708	0.0130854									9.76932	2.25263	2.99983	3.75122	1.71945	1.52983	2.15323	2.69957	1.30784	6.19996
0.0545237	0.0141855	0.139437									5.97976	5.27036	2.79249	5.90791	3.09018	2.68314	13.2684	1.55239	2.68873	6.3635
0.233956	0.0668785	0.33163									3.00986	5.08108	0.180672	5.69067	3.48758	4.2112	9.08586	2.69114	1.9622	5.7935
0.0697607	0.0194101	0.0356614									6.96591	6.86648	4.96674	7.16527	6.46095	5.00697	5.2478	5.24145	2.7609	6.0616
0.0108883	0.278683	0.0213767									8.92526	10.5751	8.35728	13.0733	4.32737	4.21556	4.58416	6.75751	5.80101	5.6513
0.0375408	0.0453234	0.0882078									11.0153	10.2746	5.58094	15.2737	4.30278	2.22978	4.83031	14.2789	5.47696	6.56144
0.0621048	0.263392	0.080777									13.9176	7.19739	1.5008	10.4388	6.28988	2.25531	3.70517	11.6579	4.51302	9.635
0.0437524	0.0856734	0.0945649									13.6627	4.04182	14.8214	3.08206	6.44884	8.01016	2.93746	6.8912	7.57917	9.81422
0.372588	0.0377027	0.0552535									10.6746	4.81877	10.0016	3.8231	3.29347	13.5083	4.01058	6.11963	15.2441	7.48637
0.0892566	0.0828499	0.0394897									7.95971	8.57418	4.8801	6.96382	0.187695	17.3302	4.69104	4.7032	12.7332	6.6585
0.0882395	0.162859	0.0694574									5.02838	6.07751	4.18866	8.0741	2.99054	14.5873	5.26354	2.3491	1.79169	10.7766
0.156106	0.0641273	0.0751216									3.22373	3.81782	5.87897	5.78378	3.91486	9.59704	9.11882	5.40104	1.56406	10.6524
0.129047	0.0354382	0.028492									1.57624	7.55968	4.10456	7.07472	3.35942	3.78337	6.62232	0.767967	0.735432	8.04585
0.0562672	0.0708082	0.271971									2.09233	10.0697	2.76467	6.92659	4.89159	4.66993	2.88067	2.62545	2.43888	10.5998
0.0209437	0.145595	0.0349399									0.761933	17.9142	5.16616	7.96662	4.89812	2.00721	3.39437	4.01272	3.57509	9.84961
0.0257395	0.00509177	0.202397									3.55553	9.76341	4.59676	6.55501	3.15995	4.41547	2.77083	12.5214	4.57597	6.6192
0.0299179	0.0987437	0.140779									5.76198	6.3681	3.49434	3.92804	1.94799	4.50017	2.56165	1.79485	1.62188	4.11761
0.122381	0.00225989	0.117365									5.44975	5.78452	3.95674	5.27565	0.920114	3.38122	2.63634	10.3233	5.75554	2.99116
0.126306	0.126374	0.177585									3.31679	4.80303	4.61507	1.49811	1.88553	7.29701	3.96848	12.9158	8.17276	2.60425
0.389271	0.0260964	0.0685696									1.79798	1.86201	5.38209	5.79196	5.60624	5.77653	8.42961	8.27987	2.16756	2.7168
0.0301382	0.06809	0.0234655									4.1314	1.07595	7.13979	12.1593	8.32991	6.14945	6.11316	1.22131	22.4213	5.41558
0.06916	0.0729594	0.0448716									4.87096	3.37372	7.50897	13.2522	7.3457	6.46761	1.46523	6.69844	14.3074	8.91706
0.0468011	0.064555	0.0331916									4.47068	5.23508	9.77104	6.85447	6.28988	7.4702	4.48706	5.77096	12.5635	10.2037
0.205176	0.0326441	0.0228482									2.24042	4.20838	7.47613	4.71707	6.93761	4.93865	5.28029	5.83047	27.0616	11.1601
0.0674077	0.0124845	0.00875561									2.22994	2.73209	5.25412	6.84848	7.92585	4.25311	4.41901	8.18338	30.6099	12.594
0.201178	0.00428759	0.207116									3.47475	5.22898	6.48454	19.2281	6.89284	9.64666	2.81067	4.65459	17.6013	13.245
0.0339633	0.0505038	0.220726									3.67639	8.49132	5.11267	11.089	5.36947	7.38629	14.529	3.46974	19.5907	16.3113
0.0849818	0.0109519	0.0516256									3.00007	8.34249	3.15276	5.32592	3.22234	3.78007	15.7964	5.67545	15.6907	21.0339
0.195705	0.151198	0.0200872									2.7301	4.83142	3.29837	4.94859	2.80951	3.63492	1.53735	4.15554	11.5072	22.4931
0.156042	0.033918	0.00696481									15.4703	4.77321	1.74246	7.67727	15.472	9.19094	1.23895	5.63873	8.47254	21.3066
0.455977	0.106047	0.0207287									13.648	8.57067	1.02588	5.93612	17.8053	9.24422	21.3103	4.36374	6.85848	19.8441
0.284262	0.0343771	0.0723179									5.57476	6.85624	2.29189	3.72765	22.2214	9.52261	5.63293	8.29962	6.31653	18.633
0.0653059	0.0799389	0.083816									2.04866	8.11364	5.14309	4.23175	18.7311	7.68503	3.08877	8.10011	5.13673	16.3989
0.0681505	0.060454	0.111904									14.1273	6.28583	7.61733	2.78272	7.6047	5.33367	6.15273	8.99766	2.60257	10.9483
0.0134569	0.0621648	0.0196569									11.073	1.45737	8.29645	2.11796	2.80763	3.20902	5.98203	16.7888	3.83499	4.47109
0.149169	0.0334503	0.0163329									14.5637	1.03935	11.894	1.47431	5.99498	2.40447	4.69397	18.9621	3.20032	2.39328
0.0269285	0.0410883	0.144921									8.25161	1.49173	7.16869	3.06093	6.5473	6.13542	2.01201	14.9328	6.20937	6.02686
0.168018	0.124559	0.0394902									2.75664	0.90352	6.38004	0.472215	4.01215	7.09242	6.4778	11.3076	10.6039	12.2862
0.0958527	0.0169043	0.0539959									8.23545	0.639376	4.8132	1.12647	8.16278	2.52864	9.11192	5.25598	11.5502	13.9807
0.0176242	0.115321	0.00637992									11.4172	0.629765	2.16824	3.47587	8.86899	6.60652	8.5335	7.28279	10.579	10.438
0.0256555	0.124521	0.0129611									12.2279	1.12445	6.55771	5.94158	8.95461	9.26269	3.2869	6.22404	11.6755	1.42114
0.0131904	0.101881	0.0567948									1.64911	4.89766	9.09438	2.67211	18.1779	4.44749	6.45221	4.24892	15.7301	4.08537
0.147821	0.0355593	0.0192757									0.8669	8.13902	9.48918	5.35608	21.41	3.07037	4.00942	3.43376	16.9366	3.44782
0.16019	0.0147971	0.00943362									3.14046	5.68875	8.61827	7.15683	12.4155	2.72331	1.72153	3.75693	12.4034	4.23339
0.0332766	0.018594	0.0289999									5.47254	3.82864	8.1237	5.60562	5.81068	0.79742	1.76667	2.72034	10.0141	1.78945
0.0490956	0.00503205	0.13153									6.50741	7.11318	6.4931	3.23223	8.88343	1.13249	2.86202	2.17941	6.37317	5.32823
0.0795736	0.0286146	0.372824									6.86663	7.77551	3.24939	2.43702	8.44559	1.35862	1.77799	4.19038	5.33902	9.49284
0.103525	0.0152436	0.0166282									5.99446	5.94893	2.85344	3.78607	7.40078	2.00638	2.26615	5.94583	3.19094	10.3615
0.0873664	0.0139607	0.0067736									7.6893	4.07552	6.20817	6.35037	6.89965	1.06993	4.3766	4.33332	2.32979	9.48654
0.02594	0.303016	0.0599843									4.31029	3.90951	8.21336	8.16984	14.1888	1.47286	3.65566	0.664547	2.7894	11.438
0.0167376	0.0216978	0.0192577									7.59499	5.03488	7.08832	9.16497	12.296	1.34527	3.25849	5.30137	5.64403	11.0825
0	0.0928897	0.0339984									14.4578	4.82154	5.13453	9.37009	4.69087	2.31732	5.12974	6.31307	8.88645	4.5343
0.084433	0.253701	0.0643015									12.7956	5.8338	6.45493	10.1477	1.40684	1.97422	6.25256	3.38594	9.34606	1.77843
0.170391	0.0606107	0.00748397									10.6129	7.41271	8.11712	9.72113	3.08207	2.39462	4.2271	1.72776	7.55732	4.06278
0.0559357	0.00880348	0.0482047									8.72849	6.6325	6.49517	7.76674	3.77465	0.674487	1.0212	3.36904	9.2018	5.06838
0.0881049	0.0165322	0.0709627									3.59676	3.81704	3.65784	5.08902	2.1143	7.13542	3.40453	1.04972	11.3001	21.2295
0.0534409	0.0821784	0.0102974									5.75322	5.91989	1.98641	3.40269	5.97551	7.60384	2.80595	6.39749	9.27743	19.6354
0.0411214	0.0314267	0.00578785									1.48307	4.88332	7.03684	19.9395	5.36461	5.15272	3.159	10.0024	5.3624	16.5081
0.281028	0.00734527	0.0219281									9.46329	5.87085	7.326	22.6233	2.77267	2.59307	4.9004	7.11562	3.66174	12.0937
0.058561	0.0227674	0.044936									8.21605	7.62622	5.44312	16.2756	4.98093	2.61338	9.53636	2.47531	7.75504	2.36208
0.115251	0.0135654	0.0194537									7.50197	6.45397	7.12026	6.04115	7.0394	2.94485	11.1311	2.14785	8.91228	5.41085
0.0341178	0.152503	0.0106909									6.358	9.87715	12.9597	4.05802	5.16158	0.88547	13.3173	4.38433	7.80754	8.70774
0.0523823	0.0868873	0.0279354									5.88266	6.00872	16.8192	5.4614	1.7186	2.45827	20.0921	5.36803	5.72585	3.96454
0.0402975	0.0171755	0.189426									4.5339	4.6995	11.7593	6.48893	2.94855	2.6177	5.52939	8.08389	14.8706	8.06084
0.375986	0.130253	0.0218377									0.294775	7.02255	2.16971	4.37891	2.61905	0.543431	6.33318	11.0805	9.32395	6.11814
0.0383604	0.108926	0.222149									6.62903	4.04232	1.87389	2.81841	1.97305	0.751462	3.78795	11.98	11.52	7.98926
0.037131	0.0703109	0.0129483									10.5421	3.32676	3.09057	1.43836	6.66422	0.431499	3.36147	9.48933	11.0974	17.5788
0.183551	0.0170312	0.0264453									9.69722	6.25155	6.7157	1.74456	3.61414	7.81085	4.71207	6.13909	9.16105	23.1522
0.0948475	0.0576528	0.0836154									8.35109	2.93209	3.18633	0.790491	7.85862	4.89176	2.65475	6.97141	7.372	21.2001
0.0109113	0.194141	0.0226001									7.20363	2.6491	4.17253	2.05652	2.65469	3.79293	2.00227	7.17832	6.22714	17.696
0.0972063	0.11366	0.0433177									9.45153	2.33789	5.68942	3.53065	4.68605	4.81005	4.48356	11.2686	7.64847	14.8793
0.249252	0.153515	0.210691									2.64948	2.6053	13.9646	3.11482	4.89755	2.14403	5.12761	12.1289	9.05794	12.4294
0.0791538	0.0297801	0.0490528									3.50532	2.01907	9.17714	4.74417	2.91379	4.98528	4.058	6.87001	8.13786	3.71601
0.0934072	0.0130087	0.20819									3.72451	1.33979	1.94649	8.83365	2.71732	4.54048	3.39438	3.71853	7.61098	9.36894
0.0476965	0.0892708	0.00666058									5.74338	2.02861	4.67137	9.12741	1.73656	4.97979	3.34698	3.37485	6.65076	12.0005
0.0868083	0.0249879	0.141423									9.40134	2.36565	9.9184	7.1605	2.89768	2.66076	5.80476	1.80399	5.28141	11.8859
0.00949557	0.216042	0.195434									9.05179	2.65453	3.3973	8.19982	3.7037	3.77002	4.03519	3.67454	4.93352	10.0075
0.503172	0.125698	0.00871141									5.41421	1.93858	4.82454	8.24176	4.47213	2.41333	4.39037	1.95756	6.21594	3.15064
0.0812518	0.252207	0.0239037									3.78841	3.22712	2.57625	7.85208	8.33139	0.88026	3.6641	1.82452	8.49218	8.24582
0.0157324	0.0161667	0.103805									4.51989	2.98527	3.16448	8.54149	9.51458	0.910106	2.26597	3.149	9.30521	11.662
0.081066	0.296579	0.0610121									6.04748	3.45407	1.331	6.59042	5.81452	4.28169	7.36416	3.84128	2.70685	4.66636
0.0144806	0.0353906	0.120924									6.4961	7.16657	3.73144	3.51786	2.50548	6.42885	3.64966	3.76211	3.46843	3.15432
0.00412102	0.221241	0.0365203									16.4512	10.9031	3.1232	3.38244	4.64888	5.34502	6.48126	5.40856	2.92382	3.18521
0.14419	0.0371053	0.12427									20.4555	10.6387	1.55958	4.13144	6.5173	2.84806	11.1936	4.34584	1.39876	3.88693
0.128714	0.0124693	0.00895077									27.1201	4.75595	3.79908	2.21652	9.84001	2.09426	6.01148	11.7649	0.756197	7.85712
0.307424	0.0845917	0.110322									32.3387	3.40542	8.31783	6.22733	6.40091	1.80862	3.3927	10.0913	1.64118	11.2319
0.416916	0.0222023	0.0194845									12.0304	7.12554	10.5403	8.64224	4.57632	2.42084	11.0154	2.07604	0.605491	11.7723
0.0646809	0.105553	0.0676895									0.591501	9.22883	8.30392	6.79694	3.25904	8.07643	8.1006	3.95335	0.845087	7.60035
0.110638	0.125312	0.0227145									9.13077	7.67531	4.72603	2.52957	4.79145	12.6802	8.46788	3.18789	3.09019	4.66461
0.0653656	0.0848548	0.0568498									6.80231	0.518795	6.96128	1.30446	6.94784	11.9505	19.1341	16.8161	4.93678	18.9535
0.0390049	0.18649	0.0844187									4.4623	8.34502	7.11622	1.82859	9.54691	9.69725	8.15177	2.42359	5.86168	21.3686
0.019903	0.0481169	0.013213									4.08579	9.538	1.6461	5.24899	8.82696	9.42871	24.541	0.765289	6.24319	19.187
0.254133	0.0524468	0.0207513									0.898935	5.87799	1.55321	4.35197	7.82609	8.59635	7.17539	4.73352	7.34185	9.96079
0.00104719	0.146531	0.0343871									2.38792	5.68375	3.35759	2.19649	4.68295	4.79697	31.6337	6.43766	10.4432	7.57875
0.0336902	0.0339463	0.0537736									9.38016	6.24365	5.73664	6.90709	4.19012	1.98271	14.4811	7.61902	13.401	3.42093
0.0502561	0.111632	0.00485865									12.7904	6.47247	9.37725	10.714	4.14747	13.7792	2.39402	9.09279	12.4867	8.17486
0.0602928	0.00199954	0.255562									6.89753	13.8821	11.8994	9.58102	13.3627	8.04614	6.06254	10.8582	9.01247	7.76251
0.0532213	0.0150707	0.0169164									8.9459	13.9277	9.58199	3.26167	19.4094	2.49082	17.9294	6.50414	4.51297	1.5711
0.108018	0.00372398	0.0564656									11.0863	3.94294	3.80298	3.62809	13.8097	3.30673	2.93663	2.39704	2.98631	5.70627
0.00972181	0.143174	0.102374									4.80152	6.16193	2.62645	1.22067	2.52497	3.63293	7.11205	3.7889	9.04177	11.7815
0.0196943	0.0635645	0.0996498									1.76368	6.31293	4.80679	5.60022	6.71714	8.94476	7.92436	5.04767	10.2754	16.0155
0.167813	0.00750642	0.0291225									3.16634	8.04817	2.90044	6.71295	10.0808	7.05735	3.1373	5.7965	7.88275	14.756
0.263962	0.10575	0.0575561									1.77979	9.58596	3.10592	4.49108	10.1169	6.28825	2.36231	5.42857	3.96678	5.23152
0.0485376	0.0388568	0.0170162									3.44196	8.69028	3.6273	2.57025	6.56776	2.63692	6.34551	3.32593	3.32951	2.70395
0.111096	0.00735009	0.133049									16.6512	5.69071	8.60984	1.78265	4.84209	7.76711	11.0335	4.72055	7.78505	4.01512
0.0432334	0.0393813	0.0855201									10.747	4.1631	4.10857	3.70796	3.59988	6.12143	11.5959	9.45722	7.50631	3.96785
0.30677	0.0467993	0.0147445									8.7092	4.5745	6.35583	8.36238	1.82015	0.81325	8.28544	12.0851	1.80732	2.03628
0.0329268	0.168116	0.0358562									8.27348	4.45627	3.9954	10.2908	4.50985	3.97134	23.2097	12.0124	6.107	3.61673
0.0171601	0.100382	0.0441889									10.2119	2.10054	1.25842	7.75613	6.66239	3.19783	19.0313	7.61379	10.8166	8.3942
0.0262516	0.0926431	0.232056									6.4012	1.53606	3.00017	3.39211	3.71476	1.69127	14.1446	23.2196	9.97061	7.35008
0.00424455	0.0220587	0.112431									2.75468	2.57889	2.1263	6.60191	2.21606	3.93363	4.36487	26.7017	6.87573	1.71861
0.0537178	0.11142	0.0130678									4.4358	1.87358	0.962285	1.70553	4.8559	2.22244	4.83768	24.5931	5.27096	8.04428
0.00431382	0.0680672	0.167987									6.84777	2.10926	2.58731	2.54338	3.08673	10.9499	11.3752	23.0948	4.4602	11.6949
0.0576754	0.00410944	0.114892									6.72664	2.4748	3.40301	2.58696	0.474534	5.4167	10.8196	11.6609	3.15776	7.8754
0.0279629	0.0197644	0.128118									7.53139	2.32285	2.42523	2.25343	3.53719	0.60437	11.6755	5.56607	0.711516	5.22427
0.0164255	0.033701	0.112213									8.16238	4.69464	3.23389	2.76364	7.6097	0.871231	6.8823	1.63823	1.94184	5.84311
0.0389402	0.0245959	0.00433984									3.83295	7.20061	7.23091	5.77542	6.71577	4.01223	7.29916	4.60941	2.89167	2.38853
0.00226774	0.229461	0.0190332									5.5621	10.1922	8.64183	8.54915	2.3198	5.13481	6.96275	3.26929	5.28225	6.69031
0.0792942	0.0319707	0.134555									6.48689	7.60617	6.12443	8.20029	1.83923	3.70089	5.37536	8.78351	8.15139	14.895
0.00026653	0.0218659	0.195173									9.10638	6.66305	1.03943	7.72563	4.28379	3.48513	7.81068	8.08155	9.70841	10.4102
0.00718139	0.0260594	0.190529									7.06873	10.0476	7.66081	11.0477	8.54654	4.83456	3.9497	4.10295	11.1512	7.91278
0	0.0834721	0.0975669									10.7948	8.9502	9.58993	5.74461	2.35174	1.66438	3.71531	3.5055	10.286	12.3588
0.00178728	0.256419	0.0995314									11.3028	5.79956	4.30263	7.99242	8.97032	3.49028	2.77595	13.4472	4.49304	17.0052
0.0426185	0.110261	0.12109									3.1481	5.20254	1.30477	7.3255	9.2207	6.06177	1.68706	21.0033	3.35423	14.7083
0.0212036	0.109829	0.0963367									12.9797	7.76395	3.08007	2.15126	3.2343	4.83941	3.65078	17.1462	1.52349	8.61006
0.0306652	0.0542935	0.0428126									17.86	7.95079	5.74286	6.97191	5.99894	1.55289	1.86632	1.87236	2.94021	4.15642
0.0276834	0.038282	0.0275544									17.1506	3.61588	4.60727	8.12015	4.10613	4.7159	6.5372	5.09656	9.09658	4.28828
0.00160708	0.180419	0.0625345									16.8396	2.97888	0.796043	7.8975	4.71516	5.53777	4.40276	4.92698	14.2719	5.40479
0.0150868	0.0520941	0.260492									21.1021	6.65722	5.95301	7.77218	8.13616	3.39409	2.25153	3.5708	14.1494	9.37227
0.0372934	0.074131	0.0214927									25.831	4.37523	8.51534	6.07475	5.47978	12.3493	3.00997	3.22405	10.7503	7.51387
0.120015	0.184709	0.139423									25.3205	2.8695	8.75948	2.94847	2.76735	19.6581	6.9821	11.1015	7.59785	6.36305
0.0101289	0.0197406	0.0859719									20.2045	6.62319	7.65833	0.226671	7.01046	18.2384	5.7867	10.5142	3.24734	9.84261
0.0145729	0.0439705	0.0324023									16.4274	4.64325	5.9029	3.02264	6.85131	10.8248	2.43859	8.8969	2.65935	15.1973
0.0584673	0.0196179	0.00286441									4.88167	3.52542	8.68714	5.78317	6.01173	5.33502	10.0413	4.04654	5.76095	16.2741
0.0210937	0.0235639	0.0854365									2.58695	4.94145	8.92228	6.74781	6.90831	2.69096	7.21409	3.80665	5.07906	14.6587
0.00852751	0.0423513	0.102726									0.975098	9.66887	6.90721	0.657263	6.37243	2.62348	1.87695	8.49256	3.15155	12.2237
0.00120934	0.0586188	0.0246512									0.620353	14.5121	2.27666	9.82673	7.81024	3.38064	5.77124	14.6071	6.81144	11.8312
0.00431034	0.0149018	0.0358482									2.10853	14.7089	2.11221	2.62443	7.22698	5.16961	9.37939	9.95287	8.1389	11.2782
0.00363875	0.0429512	0.00115438									4.21806	10.7645	1.42901	3.65891	6.41861	5.08393	10.8498	4.87298	5.38304	9.65643
0.0226919	0.059218	0.00996468									3.20594	5.70775	3.24889	4.11514	12.9566	3.99473	7.4177	5.67597	3.48756	10.6307
0.0153251	0.0127761	0.0214942									2.9626	4.99746	5.75263	3.83515	11.2475	3.78967	6.7274	3.28293	2.27101	8.67278
0.0108045	0.190772	0.0611487									5.12449	6.41137	4.85051	9.71245	3.69429	3.99881	3.34388	3.22829	0.447738	8.75448
0.00599324	0.0232464	0.183464									5.62197	5.82287	3.53734	3.51585	6.58694	1.6742	4.9897	7.11257	4.06909	8.06899
0.0135898	0.0184551	0.0415339									3.86515	5.39159	3.7772	11.6772	3.09889	1.00545	4.93846	5.61039	5.91776	7.73621
0.0548378	0.0827141	0.0257135									2.18762	5.69724	3.46492	11.5528	2.32453	1.49046	2.95639	4.51117	5.24156	5.83609
0	0.104543	0.245285									1.21712	5.74647	2.79758	4.86321	8.83413	2.72389	5.82927	2.11929	4.14789	10.0924
0.00295175	0.156954	0.0757328									4.91371	5.59549	2.15955	11.1908	7.68802	0.945152	8.67032	2.41042	3.39169	8.16559
0.04849	0.0124702	0.0155762									5.72912	1.92381	1.53765	5.43455	2.37206	3.47324	9.1139	0.955392	2.01446	3.32194
0.00754755	0.142671	0.00550294									3.56853	7.85182	3.35783	4.69254	1.64444	4.52176	3.73823	1.83887	1.87998	1.6364
0	0.0357345	0.0569634									1.78613	9.0623	5.8709	4.58473	0.697812	1.261	2.60683	5.97138	2.4239	9.04021
0	0.228097	0.00774392									2.48485	2.35485	6.98887	3.13202	0.61797	3.93565	6.11666	8.52973	5.15151	17.9463
0.0127335	0.164381	0.134313									2.31332	5.96054	5.57207	12.275	1.79862	4.04559	3.78652	7.17405	10.3815	15.7936
0.0760885	0.171699	0.0145005									0.413857	8.10506	1.61659	7.84997	3.51719	3.55452	3.73406	6.80028	16.7503	5.80263
0.00152075	0.0367682	0.127337									3.63909	5.63485	4.9891	3.8756	4.66998	11.9841	9.64305	6.84568	17.5997	13.9472
0.00405501	0.0589337	0.00733086									6.23565	5.76739	5.94157	2.14856	6.78853	7.15298	4.99827	5.83064	0.681293	11.0635
0.00839178	0.379514	0.0767047									6.64954	7.38052	5.12734	1.92104	6.3019	10.1173	0.836329	7.27547	7.61735	7.27083
0.00674348	0.0317342	0.0604721									3.61229	9.01633	3.34757	2.17087	1.81644	11.906	4.12901	8.82396	11.0435	9.98875
0	0.124259	0.0118481									1.64742	5.85986	2.98445	1.47877	3.61223	4.40886	11.721	7.08235	7.52691	6.14792
0.0330198	0.0713739	0.0512742									3.07169	8.82578	3.29486	0.86974	5.28757	5.24306	17.0473	4.11992	4.56184	10.9173
0.0694959	0.0752506	0.0193957									2.15398	8.26775	8.4064	1.78139	2.15147	2.50905	16.4528	2.3462	5.5967	15.7363
0.0287514	0.0293683	0.0285861									2.99351	6.61306	7.6471	1.4547	2.01466	11.8569	8.64893	3.3276	8.48857	17.0996
0.00105839	0.0384044	0.0905871									3.43785	5.31339	1.65954	5.67968	3.54225	8.47217	8.78645	2.92042	9.55084	13.0725
0.00405501	0.00558258	0.0322092									3.30982	4.58818	3.70205	9.31697	4.9212	7.2126	18.8864	4.40503	8.64316	4.87875
0.00147587	0.00125016	0.0809999									4.9386	1.88732	10.1479	9.62293	6.24749	4.02611	4.39518	3.39728	8.44959	4.35365
0.00149975	0.0237403	0.178853									4.57278	3.23405	6.88932	7.95518	2.34621	0.187267	6.25862	5.76107	8.4706	3.96022
0.0234199	0.0232298	0.135696									4.91895	6.59824	2.14917	6.00955	2.98867	3.33528	6.37279	10.9638	6.95365	3.69551
0.0127335	0.0131113	0.0114855									7.57959	6.53947	2.22686	6.15235	1.83787	3.45955	2.54829	15.6955	3.53703	7.12555
0	0.0198292	0.229352									7.30221	4.51416	3.02013	5.19325	3.29312	3.98962	8.31294	18.0712	2.80891	8.22271
0.00699339	0.0441373	0.00720517									5.79393	2.99252	7.24118	7.5999	5.72039	9.8675	1.19373	8.594	6.13309	6.30088
0.289273	0.0509651	0.0305185									8.59003	8.82873	3.35516	4.65069	4.12367	16.5935	11.2852	9.49866	6.682	6.60482
0.0826693	0.0188995	0.023664									11.2874	10.8594	3.90536	6.27919	0.929265	7.43584	15.2197	10.9502	7.25256	8.90772
0	0.00929153	0.0515112									12.951	5.26777	3.33581	5.47463	1.5463	4.06258	4.49184	10.5291	6.81644	9.79335
0.0105997	0.0211027	0.0444662									10.6598	3.1557	2.93929	3.78515	0.845489	8.84184	2.19048	8.89381	2.37354	8.76298
0.00857238	0.117166	0.00204857									7.55929	2.73163	1.40088	6.86902	3.36168	12.0336	3.43917	4.54071	3.3589	2.26448
0.0115874	0.0203608	0.0199459									8.24286	5.26784	4.1663	8.4793	4.23509	3.67525	1.03663	10.2982	7.08357	13.7208
0.00432154	0.327989	0.0700319									9.5868	7.18691	6.26889	8.42178	5.02186	3.3325	11.561	8.86657	6.91942	17.701
0.145156	0.0428723	0.0145449									9.37582	4.44711	6.16336	9.35043	7.18156	3.75551	13.6017	5.23335	4.51558	21.5562
0.0388245	0.150092	0.0258223									8.2437	2.41528	6.14118	8.06782	7.51802	5.23214	10.1551	4.57998	7.5519	25.6075
0.00299662	0.0166459	0.0276812									6.36757	3.65356	5.24105	4.76767	6.45243	15.019	5.79015	11.8786	13.8643	29.8208
0	0.0910786	0.0219896									4.06154	1.5728	2.83846	5.71632	8.00455	14.3638	13.0678	9.05681	7.0286	14.6369
0	0.0685142	0.0163949									1.7575	7.84838	2.39948	8.85917	5.40525	6.4461	7.44132	6.77361	2.84214	6.36652
0.0283001	0.00437696	0.0126255									15.9185	3.81923	3.41604	7.079	1.84558	11.7918	3.19164	4.26347	2.80163	2.67387
0.252965	0.092455	0.0295229									20.6392	2.17458	2.78579	3.80495	5.00871	15.0351	5.12627	6.42793	3.38635	1.47192
0.0680421	0.0258586	0.198207									19.9485	1.25732	2.19079	1.71266	7.5907	5.60982	7.34429	10.2995	5.06853	1.97253
0.0556661	0.0148725	0.0235765									4.39992	4.856	3.29272	6.82512	8.78948	2.58254	3.74357	10.2653	3.97186	2.51037
0.435802	0.155277	0.0785547									1.69479	3.23838	4.28081	5.73175	7.54163	4.20713	5.90047	8.01259	1.28246	1.21026
0.0419602	0.169961	0.0626318									3.66663	2.71027	2.29389	1.90479	6.26568	5.20968	2.65102	4.86246	1.67028	2.40979
0.0566895	0.0102676	0.245048									7.19208	1.70122	1.73717	2.72579	4.25563	4.05134	6.48763	2.01506	8.39831	4.79664
0.0291449	0.129368	0.0757508									8.68842	3.40832	1.20155	5.45795	5.85169	6.23758	14.771	1.01532	13.441	8.66549
0.0689861	0.111401	0.0398371									6.71825	8.11856	1.79295	8.29981	15.0738	6.97182	7.7038	0.682127	8.17446	11.0556
0.0185139	0.00973926	0.254831									2.07756	5.99063	2.58899	8.35656	15.3293	7.98692	5.38083	3.98595	9.14891	8.23639
0.0538411	0.00698447	0.200516									4.3875	5.36554	1.88999	5.07566	13.2071	8.66787	7.87103	7.36268	3.74584	7.86046
0.0182331	0.166495	0.251278									2.96507	14.798	3.56601	1.97476	6.17927	6.08924	2.00782	9.36539	10.5032	0.262667
0.0434245	0.0221075	0.0174474									1.13614	13.4967	4.65231	7.01446	3.88657	1.96171	2.78685	7.14714	15.5108	2.14508
0.22632	0.0274269	0.0225054									5.05458	5.6423	3.4194	8.59303	3.07057	4.02135	1.48024	4.2388	13.5313	3.63398
0.196487	0.0102939	0.129436									6.58079	5.62808	2.83158	5.99661	5.60352	7.9776	4.76568	4.52445	6.99583	3.64255
0.0302658	0.0108974	0.0376799									5.25616	13.8839	4.14762	1.53606	3.76178	7.84763	5.95291	4.99192	5.10113	3.47502
0.0809011	0.0536435	0.0266896									3.8678	15.974	14.7036	2.80847	3.58163	4.47563	1.61492	4.04072	6.30479	5.06761
0.0343404	0.0449941	0.066236									5.238	11.1316	14.7235	1.81926	3.5172	2.81993	8.25591	1.0996	4.15257	5.16917
0.0350594	0.0153929	0.073221									7.09227	9.56122	6.89002	0.710408	6.59901	5.46343	10.8402	3.34835	3.79919	2.39729
0.062166	0.300886	0.046676									7.77538	12.0565	5.51462	4.40419	8.25987	8.47048	6.82237	8.39636	5.73256	4.10047
0.0263039	0.0188391	0.112563									7.26025	13.4483	5.01785	5.98916	7.15948	9.62504	4.16432	14.6888	7.87158	4.83047
0.142833	0.0337969	0.10406									6.5768	13.2018	1.67426	6.34254	3.30724	8.45525	0.82787	16.471	7.46215	1.69697
0.00513862	0.22556	0.0217611									3.99129	13.7333	3.49174	1.18723	2.9923	5.84809	3.73912	12.0281	10.5295	6.64126
0.0722374	0.0152139	0.0153251									1.5038	11.9214	4.5418	8.56308	2.44469	2.69488	4.8319	7.6897	7.27975	4.0843
0.0587672	0.196472	0.169607									6.6029	5.7468	6.71315	9.89871	5.12295	5.89904	6.01489	5.19276	3.37687	11.5618
0.322436	0.0179693	0.147862									10.1875	2.60204	5.58477	2.70449	7.28184	10.0449	3.19391	6.5513	5.89493	14.949
0.0209546	0.198644	0.155871									10.9238	5.42193	1.8644	7.60405	7.95197	6.74778	3.04008	8.48342	6.57106	9.21358
0.0451492	0.0409342	0.130356									6.0615	4.98301	1.93277	6.26916	7.766	6.63153	3.49759	7.79243	17.5376	6.21633
0.0427466	0.0295775	0.0175439									7.91671	6.9262	2.81903	4.40228	6.3317	1.88715	2.12927	6.21408	12.3386	8.46317
0.126828	0.190776	0.0200145									5.1483	4.50549	2.90617	5.05078	6.45737	3.50163	8.16888	4.14829	4.31976	9.02795
0.0226114	0.150505	0.0139816									2.4712	8.73557	2.20707	13.7705	6.67977	9.78342	9.91896	2.60768	6.24904	3.20469
0.0194197	0.0564685	0.132922									3.11103	18.5022	1.73441	13.408	7.18898	11.9269	7.31076	2.61382	7.5459	11.0411
0.0387824	0.0419291	0.0179464									2.99662	26.9228	3.15321	6.14723	8.7041	7.02587	5.24675	8.95128	4.11617	11.8081
0.0351519	0.0698501	0.0114242									2.03125	26.3833	3.97558	1.33416	7.49815	1.93887	4.98238	16.3494	0.266472	5.79201
0.102487	0.10795	0.0544911									1.47594	8.593	5.62028	2.16892	2.72355	9.9499	4.66548	9.59356	2.32981	2.36865
0.0088495	0.0280771	0.0886189									3.40258	3.34149	6.71791	3.07613	4.42884	3.33353	3.18721	7.74987	3.97473	9.0655
0.0904924	0.0223087	0.203406									3.15129	9.89154	7.77883	4.55241	10.9962	2.6819	8.08563	4.99465	4.30593	13.7031
0.148637	0.0458307	0.0421889									3.87404	5.94408	6.60088	4.57777	3.97486	2.72768		3.93362	3.10827	16.5562
0.0628972	0.0367028	0.0276334									7.61863	3.40703	5.82836	3.05553	6.17848	1.07906		4.86403	2.06787	16.582
0.033392	0.0641476	0.0316042									7.47077	3.40893	7.30313	3.13679	5.24906	5.15583		6.30696	3.11487	10.028
0.305916	0.0560086	0.123578									6.28483	3.17484	10.5493	5.94145	9.97683	7.90434		7.02497	4.35287	15.4425
0.00544539	0.110576	0.0985066									4.96203	3.84034	6.14589	9.39487	9.86666	5.31501		6.80823	8.56022	17.0569
0.0182206	0.0130186	0.0943695									3.51342	4.34829	7.95537	8.85597	0.951593	2.91648		5.27076	13.5573	15.1703
0.159212	0.0249876	0.0530573									2.61116	4.63974	6.76359	5.20639	3.91101	3.64862		13.793	15.0456	17.4824
0.480631	0.24977	0.0213063									3.86121	4.32537	3.26605	1.95661	4.829	1.6337		2.56608	12.5571	18.4419
0.132329	0.0619698	0.0272566									4.42385	2.62521	3.06684	1.63394	8.76764	6.57205		6.56463	8.86522	17.9594
0.0613874	0.120523	0.0279014									2.89695	2.18706	4.65492	2.56706	9.37506	8.25299		10.4992	4.99976	18.3517
0.0292267	0.103385	0.044113									2.51772	3.59924	5.21671	4.39516	7.80647	7.23397		7.087	2.58253	19.2209
0.0253459	0.153841	0.0584258									6.26458	4.07589	3.60315	6.88798	6.73082	4.16999		1.82988	2.21884	18.9124
0.214558	0.101886	0.064804									5.88125	5.52383	6.33697	6.28819	3.95634	3.41086		9.39718	3.61305	7.8755
0.0256269	0.00810363	0.0498087									3.44562	3.84564	7.2355	1.90151	4.21029	4.16102		15.7843	5.25863	7.66897
0.0569949	0.0175106	0.0399844									1.76592	0.55148	4.95817	1.7583	6.12429	0.809394		14.3462	5.6288	7.65762
0.121912	0.0938495	0.0390051									1.11214	4.07875	4.23553	3.18469	3.05317	2.2207		7.5445	4.94542	7.43335
0.0305203	0.172028	0.0193617									3.6627	4.271	4.4007	4.28516	4.16322	2.86657		2.76922	4.44253	17.6107
0.0566956	0.190195	0.25221									6.87673	4.16746	2.25698	6.23823	3.55932	2.35913		4.2919	9.09088	4.62415
0.0976948	0.0557826	0.00224438									6.97822	1.58372	0.185834	4.83487	8.85254	2.79244		5.9667	11.9372	9.15845
0	0.00845828	0.0399542									4.15349	6.42238	1.08601	1.90971	7.55927	2.71231		4.56815	12.8622	8.06056
0.00393943	0.0186442	0.0784102									1.33218	10.6615	1.06469	0.649954	6.7918	3.49952		2.84798	4.26072	7.8663
0.00120934	0.012833	0.0318793									1.56883	12.3564	2.9613	4.06945	4.52254	3.58301		8.33371	3.75822	10.7447
0.0117057	0.0208517	0.116402									3.85573	13.0254	5.59034	4.41576	0.630391	2.40934		13.2577	5.73063	7.86254
0.00200121	0.0535436	0.00459425									3.66377	13.4943	7.49358	9.86914	3.56269	2.21882		12.8979	8.10793	10.482
0.00143022	0.0141455	0.0195671									1.2899	3.75386	7.27244	4.15082	4.05695	3.62063		8.4944	5.99047	3.85825
0.00132492	0.0630841	0.0363826									0.73229	8.0125	5.72826	6.45172	2.92817	4.25122		2.03036	1.77322	7.39105
0.0104313	0.214535	0.0449367									2.46904	4.10519	2.76024	5.42704	3.12365	3.88328		6.20976	2.20672	12.2439
0.00705163	0.0531482	0.0115559									6.3331	9.31999	6.92896	8.51174	5.07936	2.01823		10.1763	3.78073	14.6806
0.00568184	0.00765635	0.0137536									5.58174	6.43319	5.79426	4.88376	2.50157	1.82523		15.0905	4.42192	12.011
0.000942813	0.160482	0.00932045									3.18825	2.9908	3.13435	6.69858	2.66981	1.60104		12.1699	2.27745	9.31217
0.107389	0.302993	0.011599									4.58271	7.71702	3.13139	9.00347	6.03399	1.10327		2.27803	6.71728	8.7321
0.0110054	0.0024532	0.00581565									0.677442	3.4942	3.25682	3.95145	6.39828	4.30837		7.6066	11.4887	11.627
0.000979763	0.0605083	0.169591									1.27909	4.84299	3.39874	6.40073	8.14877	7.67187		10.1527	9.19591	17.5356
0.0165109	0.00502945	0.0785746									4.41559	8.19391	1.54631	2.45789	2.45367	9.22446		7.58579	6.10038	17.4366
0.030491	0.0281854	0.0756911									7.19158	10.2254	2.2557	5.22992	1.36681	7.42591		4.15122	3.5399	11.7362
0.0398296	0.0388582	0.0408725									7.85728	9.36377	3.43739	4.0985	8.22046	3.73666		3.23899	5.7101	10.0229
0.028662	0.0200526	0.0222729									8.52451	8.34826	6.43234	0.917503	7.84992	0.598294		3.38173	12.6838	11.2777
0.0902835	0.00595457	0.057094									9.74497	6.48748	4.48149	6.3934	7.85153	1.80636		2.84921	17.1439	10.9877
0.0426568	0.0504448	0.147004									10.1245	2.81803	2.46357	9.27725	6.59055	4.10844		3.62615	15.2828	7.195
0.054401	0.0261119	0.0854306									9.09211	10.1621	6.36803	5.51332	2.48503	5.59884		0.821587	2.92804	2.56873
0.0271175	0.0294113	0.542218									8.35257	11.6361	8.8021	4.85707	2.55651	5.20519		3.38271	1.03064	0.417918
0.00538358	0.0120848	0.0280582									11.812	6.51844	6.99924	6.92699	9.2483	4.01497		6.15831	7.75622	6.5853
0.00453393	0.255445	0.361175									17.4709	4.01682	3.28679	7.01323	4.66071	2.69895		5.94219	10.7286	10.5985
0.0468621	0.0337045	0.00677401									18.9984	5.89871	3.33644	5.08885	5.00456	0.791222		5.19331	6.7851	8.34471
0.0205736	0.0259272	0.0225955									13.4177	5.87448	3.76526	3.45163	4.33964	4.189		10.7021	1.91848	2.88287
0.218969	0.0859006	0.120835									5.21434	4.49376	1.34275	4.06368	5.29938	5.30498		6.90464	6.86961	5.22882
0.0523608	0.0405671	0.0279648									1.54085	3.74126	2.73771	5.58714	7.02896	2.93156		4.77871	7.6919	10.5617
0.00205381	0.0354685	0.146383									17.6667	4.36323	3.25098	4.24386	6.46508	3.349		6.01015	3.26236	1.49898
0.0872353	0.0259841	0.00524649									11.5871	5.85488	11.3742	4.80613	7.04733	3.3214		6.11267	3.79354	1.97294
0.194221	0.0247305	0.124043									3.33766	7.14708	12.7868	4.74206	6.45404	0.60205		7.92315	6.11658	7.36129
0.00147587	0.0114433	0.0630177									2.88533	13.4174	9.27521	5.60239	2.43534	4.09639		9.9186	1.77595	11.6411
0.0219581	0.0349002	0.00942329									4.35033	13.8759	5.45054	7.1399	4.57259	7.33118		14.3994	2.15311	12.2677
0.0903164	0.0448774	0.00757518									4.06209	13.6986	8.87859	7.50369	2.52523	11.8858		18.631	2.59522	7.0376
0.077603	0.278858	0.140346									8.35431	12.2824	9.21349	4.48551	1.03451	5.38069		19.3039	11.2254	6.88228
0.189759	0.423954	0.0808723									11.0446	6.64868	8.83802	0.307563	0.967982	1.58017		15.8325	16.456	16.6988
0.0349286	0.0774637	0.0399714									9.11612	6.25848	6.22253	1.06788	1.95775	2.00068		15.7974	15.0954	16.6822
0.0380382	0.039697	0.0136539									7.08215	8.04081	1.72773	2.77199	3.62769	0.999939		17.7048	11.0585	10.7365
0.286931	0.0554579	0.0527239									8.29843	5.50403	3.93945	7.02486	5.53972	2.75244		15.7383	9.27136	6.98608
0.019621	0.123883	0.0485715									6.53135	9.10756	10.3409	7.34318	4.60847	3.69434		12.4501	3.6958	7.68197
0.00973685	0.054191	0.020069									5.3869	5.3361	4.89569	2.9213	2.54168	3.11412		6.86946	4.11743	9.97923
0.00946933	0.021994	0.0855636									7.76674	1.53453	3.81092	2.68999	5.0385	2.96775		8.48993	4.28511	8.59238
0.0793903	0.0340814	0.010426									7.31618	7.61914	6.25219	7.94743	6.64163	3.53853		3.09535	1.88464	5.71794
0.071378	0.0581171	0.0567695									2.74856	13.2366	8.06864	8.38352	6.16381	3.70892		23.2381	2.62077	0.495798
0.00543771	0.0719887	0.0195651									7.13705	16.4089	5.77778	4.19204	4.80665	1.97927		17.5313	7.19122	3.33598
0.061875	0.0120439	0.0474719									3.62068	13.9715	6.89162	1.4975	3.33186	1.38745		5.52844	9.50436	5.18423
0.220491	0.0426584	0.129987									6.47651	4.1844	10.8848	2.9332	0.818417	2.86216		3.76386	7.22189	3.91066
0.0531899	0.117438	0.0106599									12.6149	9.79703	8.40516	4.41212	4.07811	5.01503		7.4803	4.59671	4.76303
0.00931098	0.183305	0.0473842									3.04872	15.3647	3.69521	9.08334	6.13425	7.13813		5.63792	6.14711	6.46875
0.0541381	0.0193023	0.0340083									1.77778	3.69438	10.4142	8.08538	6.2056	9.85679		3.52035	16.7105	5.59718
0.0594996	0.135388	0.00467865									4.2142	6.13654	15.0229	4.83232	3.50733	10.5476		7.5486	14.2464	4.76482
0.0150521	0.0904453	0.0579013									4.85823	5.0107	14.9841	3.77062	4.17947	6.30986		10.5337	10.2225	6.20668
0.0109541	0.0682132	0.0448151									1.86324	4.62071	15.7929	3.47639	4.26795	1.88505		10.8701	11.7741	9.51784
0.00468876	0.0433811	0.00649793									2.33307	2.94814	15.9423	7.96813	3.21487	2.80668		10.6599	17.993	9.19993
0.316429	0.339372	0.0207624									7.1677	5.82923	14.9341	10.8466	1.35031	2.44573		15.7007	20.137	3.1796
0.0609219	0.0204597	0.0553179									12.3229	3.23706	11.2553	8.33841	5.14658	1.82356		19.5323	14.4922	2.6142
0.0633927	0.021311	0.0248856									13.4952	5.00656	1.88822	4.86103	5.01564	0.869685		12.6572	6.31639	2.95974
0.198928	0.0680409	0.00558229									11.2671	3.38107	2.92645	4.39388	2.7936	2.15702		4.82195	8.33481	2.70804
0.00724297	0.098737	0.0342047									5.34003	2.07851	4.79094	3.01961	1.25096	3.4488		4.50025	11.5859	3.22234
0.0153717	0.158102	0.136337									4.38309	2.20653	6.17334	4.8115	4.30108	7.32657		4.53602	13.7007	4.3841
0.00835192	0.0881456	0.464735									18.3786	1.907	8.01631	5.64319	5.20809	7.32499		6.00269	14.2655	6.95352
0.0905493	0.283234	0.13436									21.1027	5.68046	9.22273	5.6947	4.05782	4.2394		7.07402	14.5645	11.1779
0.232294	0.0514895	0.162923									16.7541	6.07128	9.21677	5.90131	2.14245	2.31764		1.99626	13.782	10.427
0.0962394	0.0423959	0.0267985									8.89391	3.29936	8.56306	1.69327	3.28438	1.74659		4.32879	8.45384	8.25511
0.0797288	0.12121	0.0699262									12.6255	2.90657	7.6862	3.17789	6.09918	0.517067		12.6519	2.89081	7.89278
0.0781241	0.0973368	0.0598116									10.4173	1.44281	6.77315	5.00704	8.50308	3.17004		12.0249	4.12514	11.473
0.0709933	0.114943	0.0191079									11.2286	3.37923	5.09958	3.9189	6.68418	3.14042		9.25625	7.0943	15.8262
0.381041	0.207279	0.0881965									5.82475	3.07326	2.85106	2.79094	5.32544	1.72195		4.24011	4.99569	17.8292
0.122779	0.10509	0.0319355									6.63249	1.10939	2.55687	3.47194	3.9977	1.23715		8.3897	10.9172	14.0011
0.0201523	0.0860242	0.0663644									3.55831	1.39045	1.88036	4.04685	1.5726	2.98915		12.3705	9.61566	5.53602
0.0113426	0.0176803	0.0824734									11.4328	3.90774	1.94601	2.6499	3.526	0.719537		2.67613	5.01062	6.40581
0.0598697	0.294139	0.00656777									10.7109	7.82695	3.78585	3.91934	3.85217	2.75153		4.7313	5.24988	15.5411
0.203289	0.0430242	0.0113994									14.5092	6.55288	5.64462	8.74535	1.206	2.58982		9.25269	3.10752	1.78169
0.269035	0.0152207	0.078888									11.3032	11.1197	6.41505	9.099	5.22237	0.811248		9.01913	5.16111	7.37218
0.0816948	0.158186	0.0539767									14.6125	7.2255	6.77713	5.92955	6.3446	1.29969		6.69518	5.95806	7.42861
0.0368158	0.0146646	0.0533408									10.4693	8.21665	6.51953	7.7206	4.15024	4.71774		8.0691	4.44129	6.01926
0.423275	0.0194895	0.0858442									7.39601	7.20128	10.2099	6.39058	6.79645	5.24091		12.1858	4.10469	8.02656
0.0553964	0.0467396	0.0492539									1.0006	9.63545	10.9308	8.39797	11.0432	2.44236		13.3838	5.85879	13.9636
0.0395295	0.151669	0.070019									0.422232	9.03978	8.15085	5.06228	11.4641	1.09692		9.62275	4.71885	17.6042
0.258378	0.0443242	0.185329									4.1868	6.0558	7.55437	3.85476	7.62517	0.106965		5.72151	1.28933	15.1101
0.122489	0.0735801	0.0231922									2.55909	3.15376	5.81058	12.4917	3.56556	1.31881		4.18055	2.87459	6.63874
0.126218	0.143507	0.0345383									3.46329	2.06123	4.132	19.3864	0.656055	1.84828		5.68366	5.82182	1.94601
0.0638234	0.0909111	0.0162958									6.55382	7.63744	8.0644	8.81403	2.45586	3.38941		7.39777	7.05928	3.40094
0.131653	0.0108144	0.0237875									8.38377	8.05923	6.45486	0.408891	3.14441	4.03285		8.37458	7.65208	2.70268
0.024181	0.0819848	0.038456									7.18425	4.60207	2.85234	15.2651	1.3176	2.5928		8.16387	4.57972	1.02214
0.0981391	0.022753	0.025725									5.43577	6.28196	1.03903	9.37609	1.31951	2.35921		5.76162	2.66672	3.39135
0.0749569	0.0765991	0.00607937									3.31323	8.3758	1.34474	5.78036	1.20771	4.49894		1.67342	1.89599	6.16783
0.0174985	0.0068317	0.103241									0.345682	9.51129	2.17012	1.78107	6.28389	5.00146		4.46518	2.20754	7.88435
0.0307605	0.0403634	0.148531									3.56111	6.75082	7.12309	5.51332	9.37412	4.92599		5.02004	5.10656	7.52555
0.0352492	0.0451176	0.142308									4.31213	5.25301	10.5907	9.24941	9.7193	5.32032		3.76968	8.24737	6.84847
0.380352	0.138301	0.0840766									3.74839	4.31544	15.5464	12.1852	6.71543	5.26571		8.60308	10.6578	6.49676
0.0959037	0.167811	0.0500189									2.92279	2.64451	17.2399	10.1791	1.81435	6.3475		8.05111	2.47409	6.48372
0.0637768	0.0528733	0.0401297									0.411805	4.62639	8.6767	1.72262	2.81799	8.70427		4.52318	2.92925	5.76586
0.0386095	0.364621	0.00550248									1.35325	5.93953	6.52151	12.2215	4.40414	6.88706		3.52659	2.23058	4.3361
0.0934009	0.446761	0.023666									3.31234	6.50019	13.3287	13.0631	3.69759	2.29331		12.3462	4.37202	4.351
0.0088391	0.138192	0.0209698									6.24168	4.70765	14.8831	9.09016	2.61061	1.99216		7.80057	7.03373	6.84289
0.183321	0.278631	0.106974									7.2772	12.5407	29.5658	4.45037	2.05555	1.37342		11.5905	7.65801	9.49494
0.116405	0.0663447	0.302568									4.98173	18.6902	27.7951	5.51018	7.17634	1.74335		13.7078	6.56956	10.3511
0.179232	0.0872775	0.00726648									3.18391	17.9126	17.6401	10.6148	8.67791	3.05838		11.6365	2.55789	11.1307
0.0850651	0.0773002	0.10649									1.35313	10.9373	7.26479	11.8605	2.41653	3.00551		9.46614	1.58523	15.7134
0.0419472	0.0455011	0.24625									7.46919	2.62738	0.0548615	12.5422	2.06695	4.60344		5.5257	2.64767	18.6829
0.203807	0.0097253	0.323585									16.0572	2.58927	1.23464	11.7317	2.16789	7.00697		1.9788	7.6061	15.6506
0.0254388	0.129122	0.0386998									12.1968	0.811414	3.44475	6.20211	5.56537	6.87213		3.6533	4.20016	3.54306
0.0277612	0.244362	0.153671									2.74256	2.55445	6.64724	5.45804	4.10113	6.79821		4.28764	3.55971	2.28077
0.108548	0.261005	0.0269479									5.82793	2.78346	4.08882	10.2181	4.14486	13.1269		8.23499	5.1438	8.8063
0.172803	0.0196629	0.0368708									7.13429	7.10248	4.29641	5.58819	6.64858	9.53913		10.9363	0.29799	14.2481
0.0308345	0.0501507	0.0650362									3.25206	3.38213	4.96823	3.49257	3.00398	6.06601		11.6925	6.92606	13.7202
0.0762468	0.211672	0.0670251									7.70475	5.27397	5.33039	4.7712	2.85179	3.54911		9.44873	8.98363	12.4448
0.0322962	0.0814713	0.286064									13.3964	3.03547	7.5561	8.73683	4.44273	4.2174		10.4053	9.29225	6.24987
0.138359	0.0441366	0.0209922									15.6507	10.9497	11.3516	11.4465	3.99624	4.58635		12.8899	4.25429	8.70867
0.144599	0.126241	0.0286026									15.1435	10.104	6.94242	15.6848	1.95338	2.84366		16.4212	2.95909	11.2435
0.22997	0.00453229	0.00875632									13.9834	2.55943	4.34091	2.66351	3.1206	3.78443		22.1102	1.29967	11.8908
0.180617	0.0933473	0.0394805									14.2763	9.29049	8.13967	2.39019	7.21349	6.2069		29.021	1.77961	8.88858
0.170467	0.075137	0.0369449									14.3425	9.34658	12.4169	0.585266	8.50845	6.80305		2.64358	4.45952	5.44741
0.121133	0.0108936	0.0891215									12.5961	5.39894	12.672	6.75329	1.91992	3.86691		4.25545	5.87866	4.84945
0.0326547	0.0837204	0.0311974									12.331	6.29952	6.02184	6.33833	4.68201	2.7289		3.44972	10.5761	5.30082
0.130573	0.0415497	0.0241841									12.836	9.5624	21.1676	17.0496	2.14734	4.64894		5.91073	10.6912	6.35645
0.0781883	0.00994592	0.118284									13.9642	8.68225	15.7268	18.881	1.24887	4.99197		2.27951	8.99318	5.11674
0.079682	0.0753293	0.0108402									16.8469	4.67802	6.48526	15.5692	6.92923	7.00523		2.47752	7.13652	3.27181
0.113075	0.123039	0.0586546									17.6158	1.80162	2.08525	9.9515	7.89646	4.34007		2.4912	6.51716	3.60302
0.0719611	0.0243643	0.0950117									13.6864	1.61816	8.14189	3.67694	2.69448	1.32158		3.95853	3.52545	2.52562
0.0788355	0.0614591	0.0390291									3.34851	1.70303	9.47547	3.68083	2.98217	2.48077		5.89284	4.54002	1.09471
0.0853022	0.0492099	0.122398									7.24596	2.04374	0.811979	6.14839	4.32543	2.3909		8.59149	7.06446	8.24552
0.03348	0.0565949	0.0350961									19.4996	2.144	6.33299	10.8188	7.46952	1.0269		11.5236	9.03268	14.0209
0.0720339	0.259795	0.219558									18.6305	1.1676	8.12617	15.7575	5.84557	1.27666		9.62865	8.46173	15.7841
0.0143244	0.0397533	0.0176345									14.3792	4.0805	7.66651	8.94369	2.8989	2.33487		5.15043	6.49665	10.3206
0.0584934	0.0744567	0.207881									11.0467	2.84939	5.17589	3.19276	8.69505	3.34228		3.85643	2.01226	4.57657
0.0572431	0.0460086	0.018745									13.1291	4.25676	8.08847	9.72172	8.62453	2.64709		7.25206	1.76293	6.78543
0.30106	0.0573667	0.0465288									9.00715	3.46744	6.09705	6.04328	6.30213	1.38992		9.09776	2.37824	12.3853
0.031162	0.0373384	0.144103									2.45367	3.5102	2.36721	16.2533	2.62132	2.60823		6.98718	0.611761	18.8486
0.022316	0.00728199	0.0173655									7.62067	1.66721	3.17655	21.0772	4.07919	3.86405		7.56221	3.95543	23.3864
0.0157173	0.00518934	0.138567									8.35183	4.24069	10.4572	18.5795	5.88321	3.89713		12.1993	6.58703	4.70167
0.116762	0.0161336	0.0860234									5.97938	7.84734	6.1571	9.46743	3.13021	3.10184		14.5062	7.10556	4.42105
0.380938	0.0384449	0.22169									2.32288	10.2774	3.03201	5.73726	1.07635	4.80627		12.8545	6.09148	17.7263
0.251367	0.0252838	0.1383									7.41723	9.41228	4.91578	5.3632	4.82479	2.58007		2.9608	5.93649	12.1274
0.142798	0.125312	0.0195456									22.4207	6.09016	7.51487	3.53265	6.72317	3.46355		1.02349	4.29186	10.7824
0.0415015	0.0484474	0.198951									14.6263	1.9888	5.24215	1.40915	3.12998	4.86049		1.72539	3.06128	11.2035
0.0208816	0.19983	0.0253636									1.40511	4.20437	2.46226	3.47655	2.68484	3.38607		2.4871	4.60357	8.94488
0.0356277	0.0249554	0.06705									16.2688	5.56893	2.90765	1.91832	7.13599	4.51752		5.0675	6.29126	3.57499
0.387863	0.164254	0.281489									24.1484	6.65891	4.39017	2.57625	8.9159	7.28313		12.1856	6.53428	2.70721
0.0289394	0.305526	0.0298249									20.4488	5.89094	4.39117	3.16717	11.5675	14.1812		12.7805	5.14222	8.03528
0.142872	0.130856	0.0839983									12.1614	7.8447	3.17763	3.03041	12.0817	7.37823		5.44105	2.25018	10.878
0.0789895	0.397901	0.0119743									12.4824	6.32003	3.02182	8.4309	5.01863	6.05577		7.92059	1.61672	10.5909
0.230764	0.0121902	0.0249686									16.9524	2.65526	3.62662	6.02724	2.37149	3.94277		16.1511	3.37101	8.91499
0.365358	0.0408202	0.0290019									5.33378	4.40892	3.54934	1.0897	3.93871	2.78181		16.5284	4.23056	6.66284
0.414667	0.0964896	0.0580709									2.77598	9.2911	2.01072	3.40623	5.87021	4.61151		7.19327	4.26197	8.34156
0.0278873	0.0474504	0.131667									4.9366	6.92691	18.9485	0.904472	5.39536	4.33553		14.3161	2.21738	30.4381
0.0725083	0.00614383	0.045082									7.76914	6.70157	14.9742	1.80454	4.30933	2.74241		12.5244	2.08036	26.8262
0.20167	0.0334509	0.0165829									12.0709	8.51658	9.37992	2.45394	3.49508	10.6045		8.25587	2.6982	20.1744
0.162076	0.270891	0.063467									20.4154	8.02766	1.78435	2.64109	3.45316	13.172		4.89981	1.82253	17.2499
0.132031	0.0771095	0.00702553									27.8168	12.6067	6.47402	2.91008	3.71447	9.76818		4.35312	1.79767	17.7007
0.0617657	0.014244	0.0257295									23.7634	6.27586	5.88161	3.49444	4.43031	4.40834		7.75716	2.89489	18.8459
0.243564	0.245645	0.01902									9.76878	2.25498	3.65269	3.30888	7.60284	3.01743		11.2563	4.46972	18.3113
0.0424155	0.0119301	0.0671834									1.79227	3.32156	4.51879	0.882724	8.27183	9.71401		8.03465	5.32216	14.4679
0.413227	0.176904	0.00823358									4.06624	5.23512	2.28468	6.45001	8.0262	2.73411		2.52902	3.98036	9.24615
0.00887727	0.0260713	0.0135449									6.32409	2.20911	1.00869	8.35449	14.6899	7.14012		2.06661	1.64364	5.94799
0.15089	0.113172	0.0342169									11.406	2.4441	2.42762	5.58662	5.84247	9.26694		2.61482	3.66499	7.36129
0.0714748	0.137894	0.235475									16.5255	5.88161	7.63859	0.890598	0.907608	3.86067		7.41201	2.31805	15.8013
0.100711	0.0604546	0.0121237									18.5588	6.8783	9.90673	5.19817	2.653	6.24938		4.10603	5.66863	21.6727
0.0357018	0.0926466	0.251766									16.014	8.94386	5.74364	6.93268	6.90815	9.67545		8.15425	9.38331	15.2678
0.0112377	0.0300227	0.17517									11.4516	8.79287	2.77222	5.65679	9.05263	7.7094		11.1647	5.98892	2.10767
0.0510198	0.0546985	0.0252055									10.8809	6.45752	4.66361	3.68387	5.60069	3.10684		14.1478	6.2856	4.65863
0.0866278	0.00798246	0.117731									13.2477	4.43137	1.6341	1.17883	3.62506	1.101		0.992129	8.1341	5.41323
0.0464596	0.0351361	0.0431241									7.59337	2.95013	9.12978	1.38488	4.36772	3.78944		1.33006	9.55223	6.03207
0.039249	0.00253054	0.112362									6.41532	5.76528	10.5315	1.77869	3.33166	2.96316		0.904465	8.40912	6.47782
0.036862	0.0154433	0.0490061									5.16298	4.9125	5.92656	3.23471	2.92595	7.31545		2.45952	5.99324	9.68127
0.0221817	0.0875457	0.00735797									5.65687	2.51726	5.44127	7.8277	5.34715	3.85866		3.0586	2.25785	17.4835
0.154733	0.0222818	0.00857453									13.5865	1.45745	6.99673	5.59031	6.36466	4.41901		1.78749	1.97157	0.795549
0.407233	0.0109577	0.0683293									19.6161	2.8448	2.49428	3.74024	6.75841	4.62817		7.27732	2.7588	8.02168
0.0182484	0.0488192	0.0839855									18.7866	5.36624	4.35793	8.24825	5.58188	4.06623		12.2539	1.90727	10.7016
0.0897733	0.012234	0.0815873									16.4608	7.42753	3.6915	9.37134	2.92635	11.4766		12.7197	1.22361	10.7992
0.179123	0.061083	0.0492236									14.17	4.00806	4.63261	5.29936	0.598139	10.4732		8.30973	2.26505	7.87065
0.0727629	0.0421099	0.121537									14.0281	1.84654	5.52791	0.937634	4.72886	9.86419		3.71521	4.20516	4.07019
0.335035	0.0410637	0.0149796									16.203	9.8534	2.18267	2.77862	6.23216	9.93194		15.9111	3.71491	5.66086
0.0565132	0.0846127	0.0358746									16.057	12.0577	3.4729	3.06639	1.45305	10.4201		26.0855	3.87367	6.58697
0.175828	0.0418734	0.0143013									14.3149	9.20757	4.51582	3.73862	1.02782	6.28663		21.0489	6.93542	6.39979
0.0631084	0.0157167	0.102883									13.7954	5.16235	3.45577	5.63997	4.41267	3.20468		14.9608	8.66019	10.5239
0.175556	0.127293	0.0151457									2.94075	3.3731	12.0264	3.88755	6.07803	8.8926		5.56612	6.26323	10.911
0.0588922	0.0175471	0.0626273									5.02888	2.16574	15.9011	2.1387	2.50758	6.708		7.10991	3.19318	6.37716
0.169889	0.0616712	0.0118236									12.4295	1.36522	15.9564	1.92952	3.57272	1.91634		6.3272	2.43119	12.9539
0.0540341	0.130497	0.0324641									4.35066	2.28317	5.48716	2.31921	4.03842	4.52738		17.009	3.57555	6.63686
0.167652	0.0782359	0.0360003									3.94616	6.45551	4.58884	2.12374	1.23477	3.58347		13.3012	7.93914	8.20215
0.00110544	0.0391285	0.0588594									10.4572	8.62605	5.12115	2.58385	7.46511	23.442		14.6069	13.2603	6.75995
0.00628392	0.136266	0.0329987									15.3108	5.56259	1.59977	4.4457	10.1189	3.7457		16.6772	16.8016	2.22531
0.00991853	0.0104289	0.0137679									18.7471	2.41869	2.38126	7.18198	6.99373	4.42587		18.5769	18.4468	10.6619
0.0152584	0.0765252	0.117336									3.30942	3.56786	3.62972	3.98823	1.87221	5.31311		19.7618	18.2239	7.40018
0.00442899	0.0261301	0.0641548									2.23312	1.394	4.56696	2.36198	3.27146	3.2792		23.7057	9.87368	7.38349
0.0560068	0.0608505	0.0971085									1.8538	1.67705	4.09333	4.73737	4.2519	3.1938		30.7131	7.69344	6.62378
0.00505997	0.0100235	0.014763									3.57721	4.75795	2.45718	1.55469	6.28771	1.33239		33.2579	4.43052	2.38165
0.164261	0.0141286	0.0586444									19.5055	4.36564	9.71026	7.59123	9.08409	2.50334		25.4978	3.01824	4.56964
0.153103	0.0411616	0.0252648									13.4471	1.48383	9.90426	9.67488	8.72312	4.70986		11.9106	3.10752	7.19864
0.377688	0.0871985	0.0709272									3.79412	8.06611	4.65258	7.6969	5.02239	12.2826		2.94871	3.84354	7.59746
0.0931911	0.0377391	0.0183931									3.53049	9.6015	0.883903	4.49943	2.49886	10.8554		14.2607	3.19618	10.6198
0.119074	0.0904712	0.400728									3.42992	4.73823	2.33477	3.78493	1.58574	7.22778		17.7027	2.67258	15.4349
0.0259513	0.334798	0.0164919									8.91448	4.35553	3.71187	0.742974	1.32869	8.63624		18.9847	3.81	16.371
0.0196253	0.0203057	0.230059									8.49873	10.2667	3.254	4.31433	3.32626	3.55759		15.5891	4.94191	6.5868
0.0134791	0.0942119	0.145015									6.42293	13.4486	1.64929	4.64938	2.82964	1.76798		10.9514	4.92524	7.96454
0.130891	0.0304743	0.0163106									8.30362	14.5884	2.63581	1.81849	2.28373	1.54697		5.036	3.74039	9.24911
0.0386196	0.088333	0.0308497									7.94973	7.60128	3.54868	3.04399	4.57639	1.04571		5.74643	2.74838	20.2692
0.296044	0.0226009	0.0950758									7.56855	6.58209	2.6095	3.19515	4.68315	2.24124		15.1496	2.53755	29.8368
0.0364692	0.176581	0.0129862									10.9384	4.66078	3.78528	9.20806	2.40608	2.55113		19.7703	1.49298	30.2464
0.159513	0.0107821	0.0135611									9.5516	3.10209	5.64301	14.3957	2.83523	3.47423		4.85985	0.95601	20.8565
0.00213907	0.165719	0.0873072									21.4817	1.34565	7.79242	16.8559	5.50783	3.81562		4.59134	4.01914	26.5333
0.081702	0.0313914	0.0168211									27.5009	1.21769	7.22411	17.0555	3.61996	2.82423		4.33773	7.41442	24.1523
0.0847137	0.0387307	0.0521344									25.1363	1.20419	5.73392	18.026	0.883026	3.15861		4.74816	8.3657	19.8787
0.083416	0.0130072	0.104192									18.4816	1.01933	3.31776	16.3864	3.24134	1.9344		5.27369	6.48739	15.9969
0.193983	0.0145513	0.0289667									12.4759	3.40797	8.19285	3.03531	4.6553	2.62048		6.25792	3.99654	13.7901
0.0882646	0.0370689	0.00776158									8.25378	5.28459	2.81465	4.15187	2.80664	4.42057		6.71899	3.06416	13.1974
0.0111998	0.0388156	0.0457654									8.69822	3.72452	1.81242	3.74066	7.38316	1.92741		10.0868	2.81535	19.9305
0.0268965	0.215751	0.0991373									11.5663	1.08077	9.14536	0.88396	12.5521	2.75493		11.3756	3.13763	22.3917
0.0219842	0.0243874	0.123666									12.4955	1.09418	10.3992	5.21235	10.9746	2.72196		10.2326	3.06704	12.7975
0.0270255	0.0130168	0.0541282									12.3406	2.66205	16.1528	4.69135	4.07905	1.42296		6.96848	2.14128	5.06431
0.292818	0.181034	0.00552249									10.1214	5.24984	23.0254	7.45919	4.03731	1.74022		2.20001	5.06634	14.3625
0.063711	0.039109	0.041696									5.79806	6.16688	22.3196	12.0891	5.59308	3.77187		3.7815	2.41175	14.0292
0.0546602	0.00254643	0.0451002									0.77854	4.59438	11.1616	15.298	6.39264	5.30858		3.89859	5.5295	13.1581
0.368003	0.044492	0.105964									1.16895	2.66014	3.87832	12.9977	5.19065	6.37309		4.55561	6.41946	10.7223
0.0465478	0.0306292	0.142653									1.17676	2.80737	5.81641	7.75077	2.0599	5.28292		5.03943	9.0605	8.84456
0.458551	0.0126828	0.0153649									2.09337	4.93514	10.0761	2.28055	3.77696	1.95741		13.7017	12.1454	7.09873
0.0249143	0.0143833	0.0223407									1.98839	4.33046	5.61581	4.82678	2.34603	1.02932		17.0317	14.4466	18.8325
0.203884	0.0252281	0.132587									3.06906	6.38765	4.7896	7.04963	10.2762	2.14282		14.0465	13.6851	11.1582
0.379371	0.0133271	0.0392199									4.57591	4.86571	6.14921	4.26508	2.76593	2.37002		0.343222	9.46296	4.97763
0.076148	0.0225765	0.142455									5.93651	5.67315	3.9845	1.12126	2.79077	4.03818		7.77499	3.95048	2.09514
0.0236733	0.012816	0.0402737									4.98434	8.76417	2.76354	4.06641	3.69304	8.47349		10.253	2.04589	25.3197
0.170586	0.0307163	0.109864									2.3879	9.76497	6.3675	4.50782	4.24904	12.0649		5.65594	2.13953	13.4779
0.093631	0.217611	0.065423									2.23549	6.48706	3.68026	2.81118	2.53909	9.57997		5.4962	1.75049	12.7832
0.0189517	0.00261764	0.0911343									3.49801	5.1154	1.473	15.6305	1.11109	4.66623		4.00249	2.2388	2.98886
0.0636748	0.097584	0.0739795									2.02445	7.53248	3.97322	7.55657	1.42828	1.74516		8.41887	4.29446	4.68301
0.425267	0.246232	0.090539									4.01828	13.0883	3.33771	3.03645	3.27673	3.1549		13.2886	6.35441	3.4988
0.0200007	0.0142075	0.098438									5.40941	13.1222	0.934741	3.43072	6.9664	1.94818		12.7798	6.5238	3.94191
0.204783	0.112951	0.0402108									3.45744	5.88029	5.48534	4.55346	8.27345	1.42338		10.2439	4.70204	6.03966
0.0121724	0.071218	0.0250203									1.11726	2.48782	9.20857	3.63801	9.27984	1.55359		10.6968	1.66802	6.672
0.0472021	0.0574077	0.0529746									5.53908	4.19523	1.69844	2.06576	5.0272	1.75122		7.79881	2.80962	5.32795
0.342374	0.198769	0.0803716									6.41024	6.55983	1.57962	6.38925	4.267	4.41636		12.4192	5.32391	3.14403
0.106894	0.0645724	0.154913									1.3351	5.25729	2.69278	6.85779	5.63102	2.46588		6.1343	4.33834	6.32488
0.0142487	0.042532	0.0769611									5.1537	4.43574	5.82226	6.77091	5.64032	4.33268		6.14671	3.03631	4.20583
0.0526099	0.0282358	0.103672									4.41242	5.72854	10.9592	7.09966	7.50186	8.2956		12.7967	5.18716	2.92944
0.151961	0.021006	0.0587034									1.07596	6.91391	9.09185	4.83163	8.43009	5.51476		14.8798	7.70828	6.28584
0.316713	0.0350227	0.00237007									2.58558	9.51982	0.432371	5.11062	4.06892	0.487348		10.7775	8.29156	10.0097
0.219715	0.0360705	0.0270653									0.532343	10.2551	5.18145	4.77415	5.47098	0.760588		5.71633	7.47579	10.9723
0.287966	0.0514155	0.0404664									2.73901	6.00128	3.58743	1.50325	10.0412	2.51262		7.60286	7.06923	8.68678
0.0166188	0.0165995	0.045421									2.04609	4.42465	5.63442	4.70035	10.2637	3.21056		6.16447	6.00812	6.97369
0.257944	0.0306589	0.0313856									0.338542	1.70243	9.77223	5.30279	8.38665	4.08413		7.93567	2.65848	8.29971
0.0650781	0.0289808	0.0252654									0.787491	3.57809	8.24127	0.65388	4.04972	5.71514		12.5681	2.78903	8.56911
0.228996	0.00546637	0.00541673									0.556582	4.74669	4.74366	8.39378	3.86364	9.34333		8.11437	3.65915	5.92969
0.0784333	0.0247976	0.111328									3.73771	0.27701	5.34884	14.1663	2.97002	10.3765		10.1838	3.64702	3.68243
0.034122	0.0257727	0.0604496									6.56761	3.59634	4.23727	13.8939	4.89927	8.04853		13.4829	3.95844	14.8814
0.145881	0.0662001	0.0519611									4.53028	6.70476	12.0535	7.31853	12.2183	4.61919		17.7069	3.0818	10.7943
0.228757	0.224002	0.0355971									1.33993	5.43588	17.0976	0.856242	5.36514	5.92309		17.803	1.70944	5.63896
0.0703605	0.0679796	0.145244									5.13086	0.876251	16.3487	2.83588	7.08592	8.02976		16.4089	3.14604	5.18842
0.0228253	0.126354	0.0525492									7.46782	2.68507	15.3957	2.7933	11.8026	3.50484		7.90305	5.62744	13.0045
0.0957046	0.00360671	0.0661394									8.24857	2.49963	14.7921	7.99521	16.7725	7.44263		3.94043	7.42071	17.5635
0.0337335	0.234447	0.152166									8.04288	5.27845	11.6646	15.4481	13.8266	7.92133		3.28657	8.9261	16.1976
0.0324097	0.0550642	0.0746223									4.89253	9.71061	4.76691	22.8048	5.26188	4.12287		4.90432	11.2859	10.543
0.307151	0.0622366	0.056101									2.41301	16.7423	2.22066	25.2406	4.70136	3.08858		5.85137	13.4773	12.2226
0.128402	0.0691743	0.0879127									1.27325	12.6277	2.772	2.17784	4.94196	6.36413		1.1106	10.9603	12.305
0.140844	0.3351	0.0195173									3.71	5.15139	2.45903	2.32967	2.48559	5.16854		5.32113	7.54339	12.0592
0.218129	0.00758815	0.0672206									6.1	5.38019	3.9846	3.3734	1.14675	0.729391		6.28762	9.38353	12.0372
0.0102067	0.320023	0.0458729									0.133265	6.36349	1.1367	5.60234	3.3509	1.42179		5.7837	10.7733	31.7213
0.0787449	0.0279685	0.0555305									0.133265	14.8807	4.41637	7.57901	7.47257	1.72628		6.95026	2.38193	26.6889
0.0665372	0.0160769	0.108113									0.619183	18.0686	7.75269	7.88351	2.56744	4.03606		7.5365	5.54601	0.800215
0.450443	0.266627	0.00405501									0	13.2438	8.48907	5.11506	8.39399	3.52068		9.74181	5.96644	14.91
0.114691	0.142979	0.0478641									0	6.02488	4.78395	4.14079	13.4209	3.88869		8.82069	5.61145	18.1339
0.136234	0.0521159	0.00406376									0	2.75315	1.43039	6.74225	12.3804	5.20503		0.971805	3.53509	17.0488
0.118025	0.0930704	0.0233936									0	8.43351	5.20609	16.8304	7.11553	3.72343		6.12639	3.08468	18.2742
0.0927156	0.0605259	0.00120934									0	6.64721	4.86909	7.68727	1.03932	3.59635		9.48209	3.52376	9.5572
0.122665	0.0421746	0.0294692									0	5.76898	2.73674	7.56743	6.80525	8.45955		3.34951	0.971741	8.51073
0.109196	0.0950301	0.0857671									0	6.64984	2.38176	3.47734	5.36028	6.95128		3.05515	1.03905	3.30715
0.0186894	0.154759	0									0	6.29114	3.90923	0.891955	0.356782	3.28679		7.57607	1.14157	20.3376
0.184144	0.131948	0.00596245									0	3.57161	8.82559	3.45419	4.76257	4.09159		7.94983	2.64845	20.7957
0.105891	0.144023	0.0106502									0.133265	5.0813	7.56585	7.67335	6.43341	9.10249		6.73681	1.77933	19.7618
0.208713	0.0101675	0.0681724									4.46644	7.65181	6.29039	12.307	5.46424	12.8347		5.23097	2.52185	18.4076
0.0539837	0.00149269	0.00323145									2.97157	8.29031	5.44437	2.5895	5.02032	9.86167		5.0412	6.50971	18.7511
0.0122533	0.153116	0.0581414									1.3754	5.91667	5.29356	4.49838	2.05415	2.94282		6.75119	9.15221	19.2363
0.0518786	0.0923662	0.0500625									2.35417	2.52241	5.89274	2.8277	5.20003	3.9661		2.00545	9.93073	21.126
0.151351	0.116902	0.00294498									4.87591	4.76006	9.5378	3.45451	3.10943	5.65876		8.74502	9.50969	23.7928
0.0848227	0.0507392	0.0684772									4.13437	5.20429	4.85457	5.81605	5.37339	1.42701		5.80841	8.40427	24.4428
0.109643	0.124095	0.00817845									2.85934	2.26524	9.04315	2.36162	4.05858	7.43819		4.10262	6.44921	22.3214
0.0134816	0.0345806	0.0254025									3.03096	5.8774	3.06842	5.0098	5.49964	12.4278		7.58854	4.15232	16.9513
0.0180438	0.0152696	0.00393943									3.00539	7.11182	2.19131	4.76385	6.13242	8.89376		6.56874	0.572574	10.4737
0.0387318	0.0811567	0.00584237									9.4279	9.27566	3.66496	4.73286	7.5715	1.43313		2.75828	5.04501	6.98091
0.0865869	0.0101582	0.0060672									13.8781	6.37797	5.10912	7.73445	5.66518	5.16554		6.32871	4.86609	6.98026
0.0524783	0.0252389	0.0101354									10.3252	4.42154	5.84848	9.45841	0.829987	4.24669		4.17675	0.986958	6.20984
0.164801	0.0121458	0.149931									6.75988	1.62088	6.3356	5.53634	4.47023	6.4422		3.01898	3.80675	6.77265
0.0270636	0.0989955	0.00526436									6.66227	2.15046	6.81406	5.81003	9.15349	6.23957		9.15049	4.23067	12.3023
0.0408413	0.0294247	0.0374631									7.82281	2.61249	4.33759	5.91886	10.1157	2.56057		6.41002	6.81069	20.2672
0.00444377	0.0360115	0.0139056									5.86511	4.63809	2.30861	3.74738	6.79568	3.32378		7.39728	11.5315	24.6701
0.045744	0.0569498	0									2.8092	4.61163	3.30983	4.76052	1.00723	4.50023		8.94335	11.3137	22.1653
0.0808143	0.0188655	0.00576778									1.85149	0.962841	5.24405	4.7188	3.7623	3.2301		4.2285	7.44031	16.9231
0.0994067	0.00970572	0.0305913									1.72571	4.66079	5.36376	4.79275	5.34609	2.75952		4.09926	9.06863	12.5993
0.0535893	0.191995	0									3.51997	8.76623	0.695869	5.59795	5.42369	2.62438		8.04947	13.553	9.46157
0.00671831	0.176601	0.0428658									9.42743	6.87364	2.74656	9.15739	3.91331	3.10275		3.21954	9.30567	5.32308
0.0551258	0.278731	0									12.175	1.77596	2.37767	9.51679	2.86627	3.00029		1.0699	3.1813	2.09649
0.0575543	0.0903643	0.0135894									14.6901	8.1747	1.19187	6.19206	2.86267	3.92181		4.5411	6.17669	4.35192
0.0174086	0.127274	0.00278842									18.3022	3.303	1.14167	1.39777	2.6905	6.70986		8.66445	4.97719	4.40771
0.230087	0.111135	0.0317686									21.7959	0.757659	2.88971	14.027	5.93607	5.21601		9.84044	2.23011	1.88142
0.049574	0.0572148	0.0492541									22.9508	2.94553	2.44979	8.61873	7.64209	4.94997		6.98455	3.28551	4.8649
0.0235316	0.145197	0.00257914									17.7276	3.36456	0.986689	2.53013	2.18139	6.35158		4.5213	8.89096	7.25353
0.0121723	0.0409108	0.0062905									4.99885	5.08005	0.706556	5.00399	7.61013	3.67178		13.5809	9.42889	11.6769
0.0666332	0.131687	0.00037693									0	5.51617	1.76465	8.91074	3.19683	4.46111		7.27446	6.40311	16.9004
0.124361	0.180894	0.027342									0	2.64935	1.95032	5.21833	4.86267	6.07233		7.82261	2.45557	3.52195
0.0322033	0.00837886	0.00152075									0	4.52575	2.73878	3.78006	5.13112	4.73673		6.87264	3.59059	0.967903
0.119891	0.179707	0.0149328									0.133265	6.7754	6.62099	7.41093	8.00902	3.8432		4.83563	1.83891	2.83491
0.461551	0.0723513	0.00779513									0.471407	1.10378	6.97919	3.74101	3.3364	2.59868		6.21763	1.61384	0.86477
0.0920474	0.406025	0.0543194									0	3.52278	3.52033	2.31076	7.65528	3.2294		5.88599	0.412047	6.19519
0.00606329	0.153181	0.00406376									1.15228	6.77442	10.7451	5.4209	5.56113	3.6564		4.61784	5.11172	9.16395
0.216269	0.238094	0.00432154									1.21796	9.14658	11.0113	4.58475	1.23225	1.35579		4.17118	8.56597	11.6277
0.0146114	0.0645122	0.0299545									8.35062	4.65323	9.88594	2.86784	5.63879	2.63113		1.70486	9.16102	7.6455
0.0543687	0.0690619	0.0261187									8.43389	3.68933	9.50192	1.39078	9.61241	3.26114		0.802625	10.4188	10.2366
0.0730874	0.00339106	0.065951									16.7789	6.81311	6.87933	1.73646	6.161	2.20374		1.10672	10.3194	16.9332
0.0635079	0.19883	0.233761									11.591	4.33027	10.5157	2.46339	4.48503	2.28638		3.57657	7.97913	21.102
0.0548874	0.0367339	0.00447249									9.14028	1.18179	13.6642	12.1521	5.37649	1.62888		4.11736	4.33873	17.0111
0.225326	0.0958598	0.0256074									8.41323	1.86443	10.0915	14.3698	4.09089	2.28416		6.33947	1.44013	7.07306
0.0218412	0.244081	0.00895653									7.67476	2.79249	4.32775	14.389	8.05752	1.93639		8.45075	1.17895	1.18209
0.0675111	0.15072	0.0202661									5.19808	5.45807	6.57244	8.62683	9.59081	1.72028		8.32639	11.9422	1.29345
0.0427582	0.384573	0.0100483									1.12482	5.09571	4.34133	8.01997	9.85626	3.81098		2.87335	11.6636	2.97445
0.0407497	0.0358986	0.0258074									3.9085	0.257699	2.90114	6.73481	10.6761	4.65988		5.16549	9.14816	5.09807
0.0215503	0.0761749	0.0416627									5.7283	3.51309	6.31548	1.42516	9.10654	5.38871		7.00792	8.16868	7.08646
0.0761674	0.0763798	0.0986609									10.1226	3.30176	7.22308	6.24835	3.81588	8.32905		15.0565	7.1221	5.70805
0.0187667	0.0655906	0.00314969									13.8794	2.9569	3.93162	4.01974	2.40931	7.08904		8.51288	5.23987	1.33833
0.128887	0.00682112	0.0579015									1.49942	3.10516	2.72172	1.37317	4.70383	6.1429		3.61792	2.59375	8.64131
0.0252481	0.0394617	0.00816162									0.999404	1.4101	1.51361	1.75253	5.05568	6.64063		5.2571	1.79795	16.1157
0.0775674	0.0108865	0.0214654									1.57004	2.29901	3.29189	1.95371	5.17778	8.40386		2.80665	5.91517	5.40379
0.0424526	0.0557792	0.164188									1.65899	2.81387	2.60877	4.22869	7.64972	5.81169		7.35607	4.78608	9.17889
0.225068	0.0589282	0.0730615									19.8264	1.88765	3.43507	9.11456	9.57113	5.59909		5.73444	1.53892	11.2515
0.00776976	0.0334167	0.073958									17.3839	7.66887	3.11921	8.09797	7.67965	7.51136		14.9186	7.85435	12.1502
0.161319	0.054461	0.257663									14.6621	6.14549	2.50588	6.40427	3.13778	7.44088		6.6776	10.6304	7.01852
0.0305678	0.0423575	0.099882									8.00383	1.54936	3.9666	3.26211	4.08291	3.25885		6.08235	4.89067	6.54301
0.217999	0.083121	0.0720317									2.1981	2.82696	6.37655	2.0103	2.36641	4.49634		9.01881	6.43916	5.17333
0.280846	0.0492315	0.112197									4.48365	7.22588	5.83955	6.50048	4.92933	5.08224		5.30116	12.1207	6.0386
0.00718057	0.0540404	0.0750368									4.32099	8.22498	3.74791	5.77928	5.88107	3.79996		10.1505	9.51921	5.50456
0.0285068	0.191803	0.17808									7.51409	13.2526	4.07555	5.40025	8.88924	3.12171		5.683	4.1347	4.28977
0.0608307	0.00714986	0.0364004									7.21884	22.5864	4.91286	5.87939	6.76832	1.92259		4.54657	0.983676	7.4934
0.0377148	0.0352409	0.0885672									9.59215	30.4376	3.5624	5.53631	0.995524	3.18802		15.2223	1.53043	12.1896
0.0663007	0.0477541	0.0286209									11.9661	28.024	1.68717	6.08879	4.96006	3.90922		16.8208	4.20813	15.003
0.0478242	0.0113513	0.0283722									12.9574	21.7038	3.06019	5.22896	7.52544	4.33119		16.2212	4.47092	14.7394
0.143059	0.106844	0.00833752									13.5406	1.37562	4.57488	3.63964	2.94439	3.74378		4.88436	5.60181	18.351
0.0430316	0.0719996	0.0465607									11.7718	5.15672	6.19291	0.422066	1.28631	4.37126		4.29161	7.6739	21.7115
0.041859	0.0408488	0.0911532									3.23423	4.58186	5.63863	5.83378	2.62574	5.44202		5.7133	7.55883	19.6463
0.239745	0.0351701	0.0871049									12.5098	4.18327	2.25307	8.40644	1.34879	6.76792		7.24321	9.12034	14.5558
0.0369089	0.0619063	0.0792371									10.7221	6.88677	5.29026	15.0856	1.6822	5.84792		7.0162	14.9708	9.49781
0.137245	0.0139143	0.0398414									5.29577	8.19631	6.60561	17.16	1.9129	3.97508		5.39563	19.613	7.01174
0.11078	0.0080216	0.0118897									2.05048	5.52715	5.7138	8.29712	5.1472	3.2621		8.03392	4.34065	6.99306
0.0926877	0.0889958	0.0214462									8.47482	4.4495	3.08763	9.80324	3.00152	1.60216		7.84621	8.04725	3.58563
0.195095	0.0175842	0.0426691									14.389	6.85117	2.629	10.8955	3.42726	0.894657		3.69718	3.72819	2.29015
0.0944213	0.131799	0.180236									11.4299	6.63171	4.39366	8.80802	2.54649	0.262968		3.52494	3.97304	7.34866
0.0443895	0.0118694	0.0861348									2.93894	6.31759	8.09683	9.4308	4.78608	0.717699		10.7474	1.2924	13.6467
0.159502	0.14892	0.122587									0	9.49771	6.52214	8.93064	6.19327	2.34046		12.1281	2.88327	17.4455
0.0333536	0.130364	0.0400108									0	10.6148	4.36578	7.44971	8.71482	3.56436		10.0993	4.44453	17.5086
0.00578875	0.145588	0.0306157									0	5.0558	7.75458	6.41783	5.6133	2.97331		1.99847	4.34331	13.5382
0.0420613	0.0951456	0.0215548									0	3.21479	7.00798	5.19597	4.3954	3.71743		3.90958	2.94876	8.03067
0.0683439	0.0472183	0.00957963									0	3.30533	2.96139	2.00234	2.43177	2.716		3.58643	2.24795	8.16897
0.03155	0.0225469	0.0251138									0	5.59372	6.54713	2.13409	4.23085	1.01736		11.4694	3.13286	8.61658
0.0109132	0.0119773	0.00392448									0	11.3326	8.11815	4.9422	5.31066	1.34065		7.98761	4.95517	7.9822
0.0580648	0.231818	0.0544239									0	13.7762	9.56255	6.36686	2.93202	2.13586		2.14865	6.4155	6.96614
0.0807444	0.106546	0.024027									0	7.80984	0.678853	9.64247	3.65399	2.11046		2.42254	6.43618	9.23345
0.124093	0.0814292	0.100916									0	5.03969	1.60162	1.84355	1.92002	3.78356		5.86818	6.89856	9.88752
0.0390896	0.0479592	0.0593316									0	16.6938	2.66545	26.2539	1.10187	6.83861		2.80467	9.30189	6.48143
0.0506389	0.171288	0.137728									0	17.179	3.27605	1.45152	3.98472	11.6787		3.35201	11.589	6.48684
0.0223479	0.26947	0.0317953									0	7.10905	6.55884	3.6572	6.36389	12.9613		9.27011	9.80642	5.8703
0.113224	0.0159394	0.00707154									0	4.16596	1.64764	5.21379	6.10132	13.0238		15.1084	6.9521	0.242249
0.0703604	0.103505	0.00557576									0	6.19029	7.51287	8.16743	6.83088	13.2597		3.40019	5.62224	3.8544
0.0985974	0.107885	0.0530583									0	3.14355	9.93927	7.7704	7.21844	7.11719		2.62086	4.3879	6.28293
0.0177128	0.0444236	0.00299662									0	3.0792	3.82347	3.8731	6.03532	6.4964		2.39268	1.2771	6.87869
0.118077	0.0230371	0.0330706									0	2.33808	4.35604	10.0209	4.19816	7.96014		0.992563	6.10268	5.39424
0.0186999	0.0132882	0.00274939									0	0.665538	4.07762	6.84625	5.90631	10.2202		3.09614	8.34566	4.81064
0.00832591	0.251291	0.00800205									1.36697	5.11223	3.9143	2.43682	3.57764	11.7906		6.19158	5.8481	5.5304
0.0135979	0.00969798	0.0804198									3.81068	9.45349	9.18082	8.67163	0.213527	9.43237		5.64002	4.33942	5.27052
0.0765431	0.0887516	0.0461354									8.31815	14.4937	7.78667	8.29409	2.57168	7.63335		7.44971	4.04672	4.221
0	0.0706907	0.0946231									13.0721	12.0104	3.76609	2.89406	0.604905	7.31512		8.90626	14.6428	2.75157
0.00894499	0.21081	0.0147809									16.6791	3.91842	3.50043	9.29321	4.35313	5.21967		13.4274	16.5284	1.13303
0.00326315	0.197516	0.166909									18.2348	8.57743	0.511995	12.3792	4.64395	3.17662		13.0864	16.5162	19.9597
0.0254669	0.00862097	0.188702									16.0262	8.50863	3.51371	16.8653	4.82915	2.63487		5.76974	16.2621	23.3044
0.148537	0.0326626	0.0702365									16.8768	4.23746	4.60596	13.7643	8.4248	3.8554		3.64795	12.0215	24.9323
0.255164	0.18745	0.0297736									13.8802	7.05674	3.36814	7.32474	6.14955	3.34136		4.09478	4.39713	24.7933
0.0695416	0.0557278	0.013072									18.0574	13.0234	4.0945	2.98875	10.8478	5.14805		16.2106	1.76738	10.3579
0.0879118	0.14649	0.0102283									23.0833	12.7243	4.44554	4.6197	9.28857	9.13714		8.16177	3.97952	6.23477
0.102835	0.0856944	0.0134027									20.9068	6.22099	3.49426	6.27647	1.00463	7.52859		5.19639	4.71253	6.0696
0.00420596	0.133495	0.052159									13.5608	0.862902	3.13154	5.61854	6.823	3.05223		6.25568	3.90203	4.36625
0.00741741	0.316843	0.0787386									6.75886	2.25428	2.649	5.26023	10.0198	1.92967		9.27246	3.73107	7.1365
0.158188	0.0857042	0.0097253									4.87341	0.481694	1.86213	0.900645	6.36147	3.8308		9.14921	5.50294	8.42168
0.101602	0.0266276	0.0852126									4.77491	1.02696	2.56266	10.435	3.31619	8.02024		6.98406	5.04404	2.01817
0.092313	0.0463487	0.175272									8.42277	1.67506	5.24825	6.57395	2.62488	12.1806		7.90559	1.87514	8.68189
0.28229	0.114723	0.105039									11.4327	5.34523	5.56	6.73386	5.69035	10.2722		11.8714	5.66634	6.02796
0.0929988	0.0224954	0.0112507									11.3515	6.07085	3.86322	6.78492	2.71007	7.53277		14.3874	4.17652	3.93179
0.00304366	0.00728073	0.0288173									7.66152	11.0032	3.51644	8.91799	6.15134	12.9751		7.85004	1.348	2.86896
0.00037693	0.021834	0.294075									2.35197	16.0156	4.51691	10.1842	9.40045	19.0498		12.9486	3.69534	1.41584
0.00379785	0.0822725	0.11701									8.29865	15.719	5.03996	8.91136	3.98913	25.3634		35.0167	3.6373	3.16332
0.163866	0.0686486	0.0887615									12.1765	6.38684	18.6995	5.32173	5.17585	26.8004		6.20794	1.80188	8.04579
0.0798716	0.0259326	0.0518284									0	5.68234	8.37272	0.895776	3.15005	20.2165		7.80799	0.951055	7.49401
0.220634	0.235157	0.0189904									0	3.11768	1.62866	1.30539	6.50617	9.92		5.22061	0.669658	3.04248
0.028058	0.175478	0.188048									0	3.3676	4.69532	1.96041	14.7132	2.34312		4.16228	0.90352	3.41047
0	0.0678956	0.0475201									0	6.53735	2.68994	8.72359	16.6884	0.782223		8.86916	1.10003	9.15583
0.0976717	0.0312515	0.10719									0	8.27994	2.83114	15.7074	9.9234	4.75291		15.3781	0.534552	9.72415
0.434709	0.093931	0.198324									0	7.61274	3.71122	15.5857	4.08589	6.52247		15.1111	2.27196	3.15029
0.00567584	0.0447888	0.0613462									0	3.85373	2.86366	8.77226	5.94589	2.87412		2.36936	2.77106	4.66853
0.00447249	0.0510896	0.00870248									0	9.36179	1.9364	5.29426	4.40815	4.52827		0.826881	0.787663	5.88609
0.034817	0.0503603	0.0908157									0	7.69185	1.06748	7.24043	2.6217	6.50657		7.7307	4.65181	3.19913
0.00026653	0.225578	0.0194678									0	4.5972	5.0064	4.18982	8.22696	5.41417		8.85177	7.32367	4.06661
0.0036729	0.0264356	0.033577									0	0.885414	7.51855	0.829086	6.93127	2.11329		7.60134	4.83973	8.29178
0.0379341	0.024787	0.00352974									0	2.39303	6.54275	3.87003	3.13689	0.177249		9.02769	4.33392	7.91154
0.0720374	0.0829556	0.0594067									0	2.31762	3.12556	10.4141	3.04382	2.12502		6.05178	3.76434	4.10106
0.128746	0.155955	0.0277011									0	0.860139	2.28725	13.4114	0.782325	2.38752		5.36802	2.54516	7.56629
0.00624084	0.182935	0.0161738									0	0.916188	2.9187	11.7819	3.0721	3.52541		9.1193	1.97586	8.4035
0.0884628	0.0360811	0.0149869									0	3.94416	2.05944	7.06893	6.58697	4.65879		8.4757	1.63157	20.1798
0.0843905	0.0267762	0.0866177									0	8.43376	2.45817	1.98893	7.85048	3.95716		2.42356	1.53383	11.1617
0.0376792	0.104945	0.0251969									8.1327	7.33767	4.17749	1.36993	8.47268	5.22188		2.96888	2.79658	3.73783
0.0575835	0.0743934	0.0122866									8.02943	7.93344	3.29129	5.83196	7.80992	3.43371		8.16993	6.33598	3.29528
0.0216542	0.22099	0.0374818									6.44751	8.23038	2.98387	7.44516	4.53295	1.85884		13.341	8.5491	5.51082
0.131536	0.209495	0.145524									1.81365	2.91973	3.47262	4.59231	6.0222	2.18031		8.63316	8.02277	8.78596
0.0848434	0.190402	0.162805									0.285985	2.24849	3.24546	10.6979	1.23293	3.47757		4.70202	6.69023	8.38606
0.180489	0.00479952	0.0246055									1.61983	1.91342	2.4047	18.3159	8.50079	4.37939		4.04433	5.60795	5.18886
0.0274175	0.196145	0.0622862									4.27516	2.50799	1.37538	18.6685	9.73656	2.7349		4.40715	5.36779	6.94561
0.102099	0.0217977	0.00535254									6.99609	2.64262	1.91214	12.071	8.10279	0.877685		4.32658	5.56384	12.8268
0.165476	0.119148	0.0994897									6.84412	5.75072	4.0776	7.4079	5.22232	0.793372		9.06283	5.53703	15.0058
0.0398819	0.0941851	0.00584343									5.44386	11.2522	5.34691	8.18106	1.83814	1.41103		5.77789	5.89519	11.072
0.0339493	0.054522	0.0532892									4.90268	2.57941	4.5761	2.72606	0.252179	1.31992		5.01031	6.5521	4.36107
0.0336353	0.139165	0.00306205									3.83311	3.69538	2.80348	3.3635	4.03328	2.79568		12.6755	6.56662	0.570028
0.234731	0.118536	0.0372611									4.01099	12.1909	1.44765	8.90799	6.70161	3.52107		12.391	4.16088	4.46491
0.124953	0.0305808	0.0364975									4.06498	11.7047	1.16161	12.8516	5.24107	1.53044		10.3275	2.20894	3.79598
0.27184	0.0565447	0.0357524									0	9.26993	1.26713	14.472	9.22049	2.53695		8.58943	5.75756	9.72635
0.035391	0.0434896	0.0265932									0	4.33503	1.45313	12.5797	3.7525	4.42496		8.46959	2.83505	13.9489
0.60769	0.0260272	0.016466									0.133265	1.37701	2.1692	6.89348	6.79297	3.21653		11.2146	2.06124	14.5149
0.022558	0.0828633	0.0469005									0.604672	3.13984	2.19745	2.61055	6.92713	1.05526		8.92872	1.59037	13.6886
0.0832288	0.0537161	0.0173331									1.36504	4.18026	2.24805	4.25337	6.49956	3.80645		5.09812	0.356594	8.2414
0.148254	0.0464125	0.0243411									1.5561	3.40772	3.14695	4.82736	10.3376	2.42216		3.71778	0.242286	6.57911
0.0758301	0.0622154	0.00945833									0.471407	2.75082	2.81566	3.60475	13.1502	2.70783		1.23185	1.14139	6.13154
0.216133	0.0379488	0.0168267									0.395932	2.48435	1.53812	0.983018	4.86273	4.22334		13.5638	1.44903	6.56609
0.102278	0.0125227	0.231805									0.231176	3.07974	2.62034	2.76258	4.93868	4.25955		12.0067	4.23735	9.28747
0.0813759	0.0308203	0.129617									0.364441	5.87695	2.53895	3.68875	3.60033	5.15551		6.65031	6.2367	12.8637
0.0501493	0.0232375	0.0594247									1.0006	7.51232	3.54671	5.7064	3.09875	5.48162		7.5079	6.72603	12.6096
0.0158328	0.0440203	0.248228									1.0269	3.81652	5.09456	8.4784	2.73974	5.16398		10.9057	7.99316	7.6711
0.0606126	0.107234	0.126016									0.471407	7.58723	6.30577	9.17729	1.86498	5.65245		7.11071	9.91229	4.97859
0.0372425	0.252163	0.203036									0.133265	13.371	8.62997	6.54753	4.57189	5.38763		6.8999	10.9802	7.98323
0.074355	0.0611843	0.133395									0	16.3383	6.31286	1.38698	15.3296	6.52256		6.06417	12.0622	1.63583
0.0131004	0.0112026	0.116453									18.1562	13.7917	2.9571	5.4691	9.30471	4.6041		4.88567	12.4674	10.8539
0.0676434	0.166332	0.029713									12.6058	8.70454	3.74837	7.30828	8.82357	8.76788		8.65017	12.2064	10.8457
0.0286282	0.0112053	0.117108									5.08493	7.12695	3.83533	5.3101	11.1806	10.9492		7.77415	10.6221	9.93237
0.088375	0.222984	0.0670595									4.79211	6.61081	5.57263	2.18502	14.8062	9.6057		7.50289	8.2289	18.8982
0.0461965	0.103228	0.0652826									6.09542	6.19163	4.16308	0.543448	13.8072	6.90092		5.01085	5.16656	6.43181
0.531633	0.084149	0.0300009									6.13747	3.27994	2.34987	1.84143	7.78132	3.83143		3.39505	10.3505	3.12645
0.0191468	0.111227	0.01804									10.1783	1.94595	3.21018	4.13536	2.89056	4.59557		3.57423	7.16102	3.88847
0.106891	0.162447	0.0293543									5.86549	2.98593	1.85791	2.10703	1.26477	9.60421		3.28283	5.52485	2.38085
0.0310308	0.0245027	0.0490071									1.87136	2.14022	0.82385	3.2472	5.78305	7.70265		3.52889	3.25812	5.53388
0.0307517	0.127987	0.0632895									1.19515	5.8021	3.10364	6.77383	5.84246	7.85349		4.4239	3.76205	5.58779
0.0348541	0.0458647	0.103017									2.90545	8.16353	7.5114	8.1072	9.05367	8.27059		7.48969	6.63994	8.67093
0.0593054	0.0291214	0.338968									2.61719	1.25499	8.37776	1.04176	9.64694	3.00569		5.02319	5.16732	12.1754
0.0616971	0.0457434	0.24766									2.10434	6.62236	4.69452	5.16445	6.83074	4.88042		0.513718	4.01717	8.05745
0.318443	0.0283482	0.030457									1.81461	6.60955	3.67438	9.65445	6.18475	9.00152		4.77038	6.5179	3.35935
0.0128691	0.0328444	0.0490942									1.01035	5.29685	6.05325	10.0946	4.28946	6.51946		6.76858	7.22692	3.91736
0.186417	0.00915591	0.0662993									0.615619	5.23111	4.45877	9.43377	4.41399	17.7531		7.29167	8.3421	1.03858
0.0585093	0.138271	0.257391									0.388043	2.72413	1.20213	7.52509	3.85382	19.9234		6.10565	4.78954	3.04077
0.0525197	0.00426234	0.0964759									0.24023	8.51003	0.918352	4.99036	1.95113	12.6829		1.63031	5.81353	3.89931
0.0360785	0.040827	0.0638345									0.630971	12.0628	3.04297	2.96028	6.19979	1.4462		6.49427	5.44088	3.98303
0.404535	0.0313716	0.0163069									1.42685	8.34857	5.72571	1.88042	5.68666	6.96639		12.9033	3.71179	3.76563
0.151977	0.0174562	0.144641									1.36923	5.48141	6.89346	4.19588	7.16243	6.63889		14.1628	0.602952	1.72391
0.0376893	0.181119	0.0169341									0.78316	7.11921	5.70049	6.84188	4.79155	4.09551		13.5307	3.20536	0.553487
0.178153	0.0167246	0.0645556									1.00944	12.953	6.64944	5.88848	5.52839	11.1993		9.73676	5.13344	3.85746
0.0569667	0.0829754	0.0505806									1.0269	7.87116	9.33979	4.9875	3.86701	6.74739		10.8882	5.00033	6.91559
0.0241397	0.121657	0.082718									0.471407	3.24145	7.17339	3.49523	8.13713	3.38544		18.5936	4.83853	3.34705
0.00351897	0.0326978	0.0188387									3.69482e-12	2.58624	4.17487	2.47859	14.3284	2.32744		31.1479	5.01488	5.72124
0.22629	0.0183338	0.00728808									0.471407	1.22935	2.76184	3.27838	12.9179	3.30637		34.3301	5.69175	7.53517
0.268953	0.0981857	0.0205979									0.893638	5.04974	2.05451	3.60769	10.1061	4.65145		5.11374	4.59129	8.30508
0.184131	0.00710359	0.111048									0.662462	6.28124	1.72024	3.73155	13.7899	3.03223		9.0338	4.30724	6.61564
0.0241964	0.268062	0.0295973									0.0754747	6.64797	3.87264	4.28731	2.25969	18.8579		10.8454	10.1167	5.59934
0.0744331	0.0199001	0.265856									0.471407	7.28226	9.22905	3.51333	13.0425	11.2797		10.0253	15.2308	6.61617
0.117854	0.024907	0.0231081									33.4619	10.0339	10.1906	1.09874	5.27531	6.99983		5.91461	12.3083	6.42812
0.180477	0.170957	0.00858094									6.8072	9.96032	7.31621	1.66123	5.85456	13.9821		2.27659	3.62463	5.18403
0.46016	0.285997	0.0911622									9.44231	8.87653	7.40428	3.16465	9.53776	11.492		16.4245	2.88282	3.68932
0.032516	0.122793	0.0145548									9.85528	4.73432	7.89025	3.94913	9.0559	5.57084		7.38046	4.75321	2.57563
0.169412	0.0365708	0.0103651									13.0635	0.677498	5.20471	1.11349	6.96806	1.6909		6.91785	4.13411	1.96848
0.17422	0.177322	0.0441646									15.8287	1.17928	3.06014	4.4502	3.8461	10.3674		4.16988	2.82262	4.27808
0.0791971	0.0365214	0.0862162									21.7341	4.79587	3.64748	6.52991	0.467361	12.951		0.475604	3.24237	5.0481
0.0331576	0.0329368	0.151178									26.5193	2.00006	3.68743	4.07769	1.6681	6.40476		4.17027	3.78389	7.16392
0.111031	0.0765744	0.0570154									22.6282	6.83039	3.50497	1.49182	0.558859	3.12275		13.8483	4.22737	8.51065
0.0410613	0.00698875	0.0300206									2.6109	5.43869	4.7676	2.68858	3.67205	2.99086		3.90486	5.82747	6.45391
0.0519582	0.137305	0.0134525									4.1078	2.58856	4.093	12.8478	0.708593	2.77667		6.96357	2.85735	5.29411
0.0539972	0.0140757	0.0446813									6.65572	0.739765	2.22588	11.1375	3.32038	5.26375		12.23	7.42143	5.46342
0.0391759	0.0342947	0.112881									4.53849	1.56046	3.66249	2.20098	4.53106	4.46603		9.89877	4.05248	4.31363
0.0436387	0.0171371	0.0223094									5.87828	2.09674	3.85466	4.94492	4.36914	3.8071		3.8318	2.80641	7.33675
0.131111	0.316674	0.027109									1.80202	1.51476	4.8328	6.58746	11.869	6.03762		2.72737	3.05645	8.61519
0.0237175	0.00422834	0.0852777									8.90315	2.89715	4.97437	7.01301	5.58686	6.88841		0.749721	3.85578	15.3625
0.0699888	0.114155	0.0514487									6.31263	3.3315	1.70583	5.61804	6.39688	8.15648		4.84834	3.76118	1.84462
0.136656	0.0253328	0.0396146									5.03784	2.51749	12.3924	5.99766	9.80778	3.02648		8.12184	5.44452	2.87226
0.216154	0.168347	0.0194161									2.52753	2.98259	5.91169	7.13742	8.06799	7.98306		5.69006	5.91725	2.58597
0.060773	0.00412176	0.036524									5.70643	5.36472	1.7444	7.6212	2.05535	9.36797		6.38244	10.3082	1.95027
0.0636182	0.223484	0.0100291									9.14511	6.3483	7.46819	3.4129	0.949627	6.23199			14.4226	2.36199
0.0379147	0.0395678	0.0185272									7.86452	4.90955	6.50664	1.76498	3.41137	3.95493			1.01955	5.51007
0.0129379	0.020685	0.0199291									7.87127	6.17292	8.31506	3.41461	5.33435	6.70716			4.0264	4.95727
0.0136316	0.0339298	0.0357865									6.23797	7.0057	7.606	7.89173	2.8635	3.83107			3.52143	2.27645
0.0159271	0.0852513	0.0089243									3.9586	4.07488	3.87127	6.16418	6.47752	9.76612			2.97551	14.7843
0.0436648	0.103238	0.193166									1.0247	4.89368	6.54121	1.69112	4.60156	20.787			5.15623	9.69345
0.0180744	0.14415	0.368845									8.83467	5.37677	9.1106	0.353304	1.80561	26.0295			4.54996	6.17833
0.109712	0.0281513	0.232103									9.65493	6.49302	7.69051	0.331012	3.994	22.8259			1.46536	11.4203
0.118326	0.01396	0.0791413									10.7231	10.5456	6.11106	2.99774	11.1246	0.473965			5.10053	12.9178
0.069891	0.0874307	0.254767									9.36351	13.3817	6.24357	4.32631	7.71431	1.22712			4.29649	3.55404
0.0650364	0.00860475	0.0221789									3.85586	9.30124	3.14701	4.96279	11.6076	1.9194			5.40733	2.37198
0.349241	0.143934	0.223427									2.47598	2.18319	1.42183	6.58065	10.5007	1.8016			8.74947	2.85901
0.147207	0.0415509	0.115392									4.81544	2.38205	3.29161	5.25141	4.92367	0.600576			10.1049	4.38389
0.183116	0.367186	0.148693									4.58797	3.95549	6.42568	2.13147	3.69199	1.24577			6.65299	7.92293
0.163722	0.0680431	0.0667475									2.66992	4.17627	7.63777	2.46518	5.15353	1.29713			2.55867	4.56607
0.0412369	0.0917512	0.0501247									3.40765	3.41321	5.54263	5.37154	9.83261	2.74596			1.18343	0.472016
0.00827239	0.121759	0.11984									4.48858	2.61719	8.82633	7.39859	7.6237	3.42528			5.25144	2.3474
0.0133586	0.359856	0.125386									2.67908	2.92469	12.7791	10.3279	5.11352	5.10232			9.628	9.85923
0.0664073	0.0126963	0.0178699									2.32506	3.18188	11.5836	12.6665	5.16214	2.53837			3.92149	6.36997
0.0618575	0.0296198	0.0230918									2.33485	2.93626	6.24981	15.7257	5.17173	1.31853			8.14005	7.5796
0.0112739	0.0141176	0.0450315									5.00928	1.86048	6.25529	17.0965	4.71797	4.01525			11.1926	6.99401
0.074383	0.0136215	0.0202159									4.67447	1.46764	5.61078	8.96511	7.09701	6.27443			10.3243	5.736
0.0185773	0.333666	0.0202404									2.20101	2.21151	3.99672	2.48622	8.4295	6.4017			10.8109	5.05133
0.0566708	0.050585	0.179015									2.56816	3.22501	12.9766	4.64799	8.70976	3.51514			6.92121	4.67518
0.0518368	0.0621132	0.0209865									3.5728	6.01067	4.85288	7.12088	11.7972	1.953			3.84704	5.13091
0.0668309	0.0163149	0.387816									1.13387	5.84243	2.09882	11.3499	11.0223	1.15636			3.70442	7.43172
0.41151	0.0316917	0.0972991									0.133265	2.44856	4.16927	14.4076	7.45021	1.12996			4.0257	9.77997
0.0707973	0.0382922	0.0724179									0.471407	2.47804	5.86639	10.2081	1.08481	1.75586			2.75709	8.31499
0.221778	0.145255	0.0446356									0.893638	5.53624	5.85338	4.8605	7.41444	0.266837			0.746213	6.36843
0.0408919	0.0106619	0.0468977									1.13387	6.98242	6.14355	2.75001	13.5237	2.33597			1.54532	5.52994
0.0196977	0.0127195	0.0860424									5.41685	4.71502	5.16435	6.92847	0.308571	3.81117			3.17443	6.1189
0.254778	0.042329	0.0756124									10.2322	1.05019	4.65653	6.33128	15.6721	4.55615			4.21642	2.39039
0.139877	0.00740523	0.0435919									13.1446	3.52049	5.67696	2.86233	24.4312	4.67537			3.55283	4.49071
0.0185613	0.0121909	0.0437415									13.0889	2.89926	8.5247	5.34949	19.2939	4.68642			5.00336	4.95023
0.0690423	0.142691	0.055045									12.8468	8.03192	9.18719	6.83455	9.60593	2.71589			7.33264	23.4128
0.0593811	0.0133601	0.0187037									12.1058	7.03702	7.33108	9.85146	8.39581	0.890459			8.44702	15.5084
0.00673575	0.0174349	0.0491378									8.77626	3.97249	4.99571	8.12375	7.11029	0.533117			7.9318	8.21088
0.0430037	0.0317002	0.0565922									5.83504	9.26771	4.08957	6.44939	7.65489	2.1431			6.24603	5.48019
0.117123	0.104537	0.217539									2.12094	7.24019	3.02901	7.66533	4.38542	2.00832			3.95823	6.07967
0.25872	0.107253	0.00732759									8.52467	3.17911	0.787197	5.45183	3.13251	3.00111			2.85648	7.43879
0.0658049	0.266966	0.060425									13.3972	1.04519	7.43205	8.85364	6.12957	2.24144			4.58887	7.9903
0.178332	0.118992	0.0219807									13.2333	2.97807	6.95889	7.54056	3.50617	1.7123			6.46346	7.33369
0.52505	0.169069	0.0947544									12.2349	2.69522	6.71272	4.3067	2.79667	0.545476			6.58244	10.3027
0.0535439	0.1864	0.0890377									13.1455	2.06024	4.42697	4.99569	2.31707	2.15707			4.49613	14.9017
0.127708	0.00600434	0.066756									13.4762	4.341	3.49451	6.38568	5.00853	2.96072			2.71064	17.5329
0.171427	0.0667972	0.16163									10.3536	2.93293	5.35597	6.20158	7.94124	3.429			4.74797	11.981
0.106604	0.098029	0.0256065									0.529197	5.12286	3.68944	4.88175	10.5879	5.6861			6.52151	9.60721
0.0366974	0.0129176	0.0617561									0.529197	4.48644	6.46703	3.96614	11.594	6.16516			7.70407	8.96878
0.0708729	0.0336712	0.178632									0.893638	1.0931	2.79143	5.51677	10.779	3.34926			9.1161	6.09489
0.0300256	0.0432734	0.023123									0.471407	5.56184	4.03755	8.23764	8.93093	0.329691			9.39586	1.69374
0.0491304	0.0824976	0.0115443									0.133265	5.61473	2.6008	3.61046	7.85932	1.97705			6.32515	3.10745
0.089764	0.0135684	0.0434666									0.133265	5.88829	2.30604	3.2729	4.07904	2.68472			9.6893	7.03568
0.00840016	0.00970041	0.00593195									0.471407	8.89718	8.71866	4.45673	1.47653	7.45095			10.4254	12.5394
0.0384733	0.0862742	0.0105033									0.893638	7.95044	9.54213	3.26189	1.19577	3.35063			6.62035	16.5147
0.293884	0.0334529	0.0166889									0.471407	4.16701	3.45209	2.16228	3.68953	3.81617			1.62524	16.9273
0.0407224	0.0369567	0.0221245									0.529197	7.29318	6.96759	1.10133	7.23486	4.82199			6.17565	14.978
0.109538	0.071113	0.0562786									6.37767	3.66899	8.13827	2.26282	6.9165	3.36308			9.87238	14.818
0.309728	0.00225434	0.0290658									0.969113	4.21642	3.95827	4.8298	1.47949	1.38575			7.57552	18.7154
0.0531531	0.139948	0.0118831									1.13387	2.84517	2.02844	5.43821	1.2398	3.76565			3.31142	21.5965
0.102529	0.0387841	0.0188998									0.893638	2.50777	2.13286	6.38503	4.09945	1.41133			1.01327	17.9676
0.071146	0.0514654	0.0237983									0.133265	3.18561	0.730038	5.21543	7.49016	9.18888			0.677	13.6875
0.0693185	0.153261	0.0342436									1.36504	0.330277	2.68422	3.48635	6.30909	4.46281			0.728658	17.6826
0.12916	0.0339393	0.021422									1.89424	8.24716	1.91273	3.83002	3.58424	5.86657			1.71963	24.1887
0.332474	0.0375073	0.0235064									13.2161	12.029	3.94649	2.30118	2.16768	3.76571			3.62917	24.0234
0.0926447	0.00606549	0.0244122									9.94131	6.0857	10.7768	4.47754	3.28675	8.00957			5.84285	15.7616
0.0525857	0.400415	0.115817									1.68019	3.26585	13.7548	3.83414	1.90928	3.04638			6.29954	4.16693
0.00311861	0.0258931	0.0423334									0.708713	7.00555	9.14998	2.72769	1.97649	7.57659			7.09462	4.10653
0.0318075	0.0700037	0.144617									0.559932	6.56153	2.66439	5.17033	4.77484	5.9652			3.11494	2.72049
0.0318643	0.0457606	0.0505298									0.557761	4.36401	6.98471	5.6294	9.13671	3.08544			4.77467	9.89807
0.02855	0.0693458	0.138506									0.565701	5.94548	7.72004	3.15326	8.53416	1.68016			6.69131	13.0705
0.395129	0.102236	0.0299554									0.867737	12.3333	6.0349	0.310619	2.82875	1.7485			8.16291	12.8984
0.102199	0.210918	0.113239									9.24789	11.9245	10.7066	3.21032	1.1705	5.66127			6.69406	11.3962
0.120702	0.127955	0.0956699									4.86008	7.64236	10.1044	7.84057	3.306	7.08952			6.20381	9.50411
0.1992	0.0412862	0.141586									2.55342	4.14495	6.12753	7.41835	3.87378	4.31013			8.40935	4.60954
0.122244	0.0210624	0.153549									4.76818	2.94417	4.7605	5.53325	3.50134	5.81999			10.7522	3.01443
0.0851329	0.183203	0.134762									7.23993	2.28772	5.83661	3.40008	2.33488	6.92369			10.3151	17.6351
0.0611644	0.254604	0.115201									4.06024	3.47244	0.684955	12.7848	4.57011	4.4256			8.24168	15.5828
0.0296522	0.0218532	0.0525099									1.79632	1.95856	5.10834	16.6974	8.93856	5.89807			7.76083	17.162
0.371472	0.349914	0.0350601									1.81454	1.60476	5.67295	13.5831	10.0578	7.39927			2.39566	18.4865
0.0454032	0.176306	0.136645									4.21065	1.90474	6.70052	5.35949	5.72668	2.56815			2.78144	18.8935
0.0101556	0.167375	0.0166605									8.61406	3.55601	7.55534	8.08131	9.54897	5.86042			2.06	19.8578
0.0359175	0.0235208	0.126143									13.4453	5.63766	4.86642	17.5328	19.5507	1.92157			2.23175	21.1971
0.249736	0.0514743	0.049858									0.422232	2.39798	2.41932	17.3707	27.0703	3.03537			2.0329	21.7728
0.067594	0.0112191	0.0281963									0.867339	3.16915	3.09881	10.619	26.022	10.53			0.954033	19.2988
0.11936	0.0188941	0.0459399									0.497706	2.51237	1.20914	6.61028	16.4051	16.1966			0.484974	14.9286
0.00768844	0.0177851	0.0749733									0.106965	1.84239	3.35727	7.47703	4.61653	14.9444			1.91596	12.1162
0.0122363	0.0381668	0.170347									2.02751	2.17809	4.99933	7.65599	3.58162	11.8663			6.53206	10.889
0.0813034	0.0271896	0.0147003									1.49831	2.25355	3.45859	4.30318	4.17287	6.92845			9.15073	8.63774
0.0451044	0.159412	0.118327									8.3779	5.60654	4.66386	0.570881	2.51043	2.61915			12.5324	6.64368
0.0200887	0.00778103	0.00586194									6.04621	11.3941	0.672163	4.74937	3.00039	4.88501			8.35244	10.802
0.0685247	0.0101702	0.0715818									8.4368	12.3344	1.10269	7.19146	7.84042	8.19737			6.10814	15.5775
0.286053	0.121381	0.020012									0.529197	7.53087	2.71405	5.40136	2.89173	9.18244			6.90695	15.5644
0.307611	0.212254	0.0317585									0.191055	11.2405	2.91519	3.80888	3.98707	5.43424			7.13728	11.4809
0.0480763	0.0176263	0.020426									0.338142	15.3469	2.81867	4.39897	2.53364	0.981459			5.76385	8.0121
0.0398128	0.0682579	0.110051									2.65018	11.9147	2.56856	5.74941	0.550414	2.64662			3.31053	5.43134
0.380652	0.0873943	0.0719434									1.49831	4.05899	1.43624	7.20901	3.3028	4.89296			2.60624	3.85474
0.0519873	0.173241	0.0901538									1.89424	7.75893	0.422203	4.63706	5.87384	1.43804			11.4483	8.06309
0.0182582	0.0426848	0.0287227									1.0269	3.5275	2.4273	7.22779	2.60959	7.34372			12.0429	6.19679
0.0423539	0.208995	0.0471865									0.288967	0.89329	3.08091	8.28723	2.96377	11.8103			8.65467	7.78139
0.0563335	0.0404107	0.0144488									0.395932	3.52986	2.5556	5.00043	2.27512	11.1015			5.26367	2.10613
0.0644166	0.0178745	0.0271594									0.529197	12.1509	4.18933	5.157	2.94794	8.99897			3.26405	8.47652
0.0444802	0.0342242	0.141856									0.760373	21.3166	6.49958	5.52123	4.72274	6.88731			3.13003	16.8571
0.0743212	0.103486	0.0245011									3.69482e-12	19.9134	4.31094	4.62598	5.49699	4.53979			6.80462	16.0784
0.106676	0.061497	0.00498557									0.760373	9.77158	2.55629	3.71857	7.05778	4.07995			9.31531	5.94641
0.260715	0.0384265	0.104645									0.529197	3.30461	2.53744	7.21628	5.28629	5.43303			9.10869	5.48534
0.0035577	0.0111057	0.143745									0.529197	2.30425	8.62379	10.7311	0.477261	6.06116			6.2635	7.81112
0.0115405	0.035379	0.0322665									0.893638	8.93085	3.88144	9.40655	3.4375	4.88887			2.19783	7.16284
0.0266508	0.0327228	0.117358									0.338142	8.39995	4.00583	1.1445	4.48062	2.67937			2.12834	4.46569
0.168873	0.0634144	0.00715143									0.338142	2.56023	7.39288	3.94673	5.11723	1.95837			3.57447	7.06309
0.00435986	0.191345	0.0197822									0.893638	1.40131	8.65203	2.75287	4.55878	3.28829			4.41449	9.5881
0.0943254	0.00981767	0.0759945									0.662462	5.61923	5.13633	1.67644	2.14127	2.55284			5.04613	10.1235
0.0378056	0.267892	0.0602889									0.0577903	5.08652	4.49366	2.17359	4.00858	1.71224			4.99755	8.30519
0.16916	0.170582	0.0300293									0	3.97916	1.9019	3.11587	4.85091	5.97245			5.05036	2.44661
0.012633	0.00715918	0.0431591									0.0577903	3.40857	4.81077	4.81807	2.69953	6.04516			5.33877	4.33261
0.0188347	0.0223235	0.0871086									0.662462	4.9628	2.03107	3.97686	4.54871	3.50918			7.04119	16.669
0.167373	0.0399654	0.101362									0.893638	5.01558	3.07317	6.07112	2.11167	2.8802			5.20129	12.6398
0.0246325	0.0078182	0.011593									0.471407	4.92992	0.969113	5.82099	3.70623	0.489881			3.83278	1.22289
0.102227	0.0789562	0.00510214									0.133265	9.76001	0.988367	1.88451	2.20709	2.44461			5.81701	3.58751
0.128848	0.0726087	0.0609461									0	7.17539	0.987168	3.00789	2.62677	3.23251			6.91505	7.35467
0.0383327	0.0133843	0.115187									0.133265	6.14088	0.364441	4.34292	7.65846	4.97518			6.51773	10.0589
0.0153188	0.103751	0.0418572									0	5.7488	0.595854	3.46781	10.8557	6.32823			6.16234	9.63562
0.102125	0.0367929	0.0121155									0	6.32631	1.24534	7.32449	9.66617	7.48005			5.92064	4.10535
0.0805993	0.00920116	0.163025									0	5.32834	0.677	11.8671	4.11488	7.3374			5.30615	4.58891
0.102658	0.191586	0.0233119									0	0.560421	1.15524	13.1459	5.17164	7.10338			4.38736	6.82633
0.138321	0.0032347	0.0401321									0	1.97397	1.97475	8.71546	8.40143	5.68403			3.38978	8.89331
0.0710524	0.12077	0.0384982									0.133265	8.2698	1.12994	3.80473	4.58748	4.51109			18.6512	10.3861
0.042954	0.0550781	0.108418									0.471407	14.594	0.318216	1.40287	4.88878	5.36143			15.9641	9.36834
0.012588	0.0451041	0.0207694									0.893638	1.97348	0.395932	6.66392	2.39448	0.65091			5.72922	7.3736
0.0336205	0.0851487	0.0500998									0.529197	1.65322	0.529197	8.89747	1.79296	4.29199			7.86068	8.88436
0.0787047	0.12868	0.0646393									0.529197	5.23817	0.893638	3.77533	1.52674	3.9603			8.17076	10.615
0.0991552	0.0112088	0.0697671									0.760373	8.89625	0.471407	4.42839	4.10769	3.3441			6.30578	12.3975
0.0173607	0.0763534	0.0659522									10.3209	10.1304	0.133265	8.18535	7.8714	2.6007			4.38712	7.76033
0.0148377	0.00484171	0.23468									8.73725	7.26258	0	13.1608	8.29205	3.23312			1.6042	6.61028
0.0226538	0.00757283	0.0289936									9.75599	5.02734	0	12.8883	6.74402	1.65547			1.35862	5.14702
0.0949228	0.0122743	0.0369167									11.8463	4.22772	0	12.6344	5.63245	0.733672			2.10917	6.70645
0.466662	0.225006	0.0245205									12.005	3.28339	0.133265	16.4943	4.5015	3.13605			4.48005	4.86296
0.193375	0.0722854	0.0262077									9.92358	8.51185	0.471407	6.12598	1.65552	3.56364			6.53959	5.33992
0.13701	0.0702454	0.0462404									8.74009	2.00063	1.0269	3.31332	3.09903	3.02599			5.92535	8.51263
0.00402061	0.184706	0.0724069									8.51381	4.3482	1.0006	2.01856	3.74273	2.50194			3.42104	12.7985
0.054534	0.0743008	0.00836305									9.52864	6.1357	8.6953	3.54524	2.65806	5.78253			5.37132	13.9697
0.0210323	0.0477276	0.0514935									8.8842	5.53276	6.66748	2.80492	2.88511	8.26323			11.82	10.7146
0.0198006	0.0289932	0.0681404									1.8843	8.83096	6.04736	0.9603	9.97242	2.94892			11.4168	6.55668
0.0570681	0.0534626	0.0628696									19.3834	10.1497	1.67604	1.29326	8.45612	1.29823			8.78737	8.1156
0.0111483	0.0178094	0.142498									0	7.10591	6.96127	1.15679	4.53628	2.19437			7.93992	10.7715
0.115089	0.137599	0.0366761									0	1.63217	11.251	1.69188	2.43412	6.14203			5.63653	10.7025
0.157001	0.113548	0.0302158									0	6.36876	9.43395	5.85981	3.13255	10.6459			6.68119	9.34717
0.0454542	0.0722185	0.085858									0	8.79182	9.58425	7.60783	2.74229	4.28636			10.2366	9.89726
0.0375421	0.111076	0.114054									0.529197	5.97	8.07937	3.22031	4.35692	10.6208			13.8552	13.6961
0.071323	0.231696	0.0262612									0.266837	2.58846	3.41188	1.28917	10.2012	9.73147			14.9443	17.9506
0.0485013	0.0291945	0.102737									0.595854	4.26547	1.19275	1.68596	7.66666	3.76722			11.4253	17.6686
0.0319639	0.105845	0.131716									0	6.79037	0.529218	2.45538	3.33805	12.1281			6.38549	1.50828
0.0119848	0.222195	0.0444909									0.133265	8.0841	0.999362	2.63859	0.458843	1.98541			4.82385	1.50486
0.0776246	0.0557595	0.0817737									0.471407	8.49126	0.843788	2.12677	2.63294	4.60498			8.78575	3.82617
0.14816	0.051397	0.0223716									0.893638	10.2359	0.825709	0.547838	5.89315	5.55451			14.9005	5.93442
0.437006	0.0846294	0.0315105									0.529197	8.39052	0.760373	4.81649	6.41603	2.95178			17.0547	10.3575
0.0451447	0.00427498	0.043									0.529197	3.45618	0	4.57142	4.34908	2.97943			12.8593	13.672
0.161234	0.142163	0.0264144									0.893638	13.8885	0.760373	0.412766	1.25921	3.93545			7.30382	9.10675
0.0394181	0.112295	0.140554									0.471407	15.8754	0.529197	2.60525	2.29735	0.999417			4.7973	4.55733
0.0396521	0.045287	0.0040426									0.133265	14.8348	0.529197	5.53104	2.112	4.07502			4.08602	13.6437
0.00712184	0.0296403	0.0443806									0	10.7521	0.893638	6.18388	1.42091	9.15423			5.18065	15.7762
0.114315	0.125085	0.0958821									0	5.09749	0.471407	5.2108	3.12859	5.90692			9.12217	11.2181
0.125391	0.107168	0.0222032									0	10.8622	1.84741e-12	5.3916	2.99256	5.17221			13.2401	5.44393
0.0820438	0.0161124	0.0314753									17.2345	15.3761	6.40871	4.76055	3.52369	5.42311			13.333	4.42349
0.0727227	0.0151527	0.141621									15.6493	11.4517	0	4.15767	4.35263	11.6341			6.0328	3.8497
0.262079	0.0821727	0.156585									12.5147	6.24955	0	3.44977	3.4305	14.6649			11.0658	3.14632
0.0574412	0.00939532	0.046176									9.9814	3.8768	0	4.19137	5.44139	1.65052			14.3214	4.09378
0.0222273	0.00965144	0.0582328									7.64481	3.97778	6.48213	7.17766	8.64556	8.68969			11.5444	5.78236
0.0114214	0.0167054	0.0702748									5.47411	4.50658	9.515	5.59868	5.85332	4.95426			19.6395	5.88302
0.101281	0.211939	0.141072									4.95108	2.42424	6.54473	2.71752	0.747627	1.11645			24.1594	4.4545
0.0449406	0.0309391	0.0262156									5.30104	1.04458	0.676117	8.0503	4.37334	1.50496			21.0489	1.49831
0.025523	0.0345931	0.0205087									6.15352	1.47365	3.41819	8.17478	6.43084	3.27093			11.1603	1.78333
0.189846	0.218857	0.00909807									6.88782	2.30778	3.49497	6.58118	5.55511	2.17394			3.43755	2.85754
0.195008	0.173529	0.124305									4.39928	4.38009	5.16456	4.5122	3.92367	2.64275			4.02844	2.85249
0.0551068	0.0806605	0.043077									1.50422	4.61828	10.808	1.56781	0.95548	4.24551			4.37901	3.76738
0.0173529	0.0779096	0.0814152									2.02751	4.61843	11.7399	2.86038	1.02551	3.61958			5.06009	5.06221
0.0402336	0.0714361	0.0226863									1.49831	6.70488	9.86361	9.88829	2.38735	2.38812			7.42072	7.44008
0.0408255	0.251738	0.0430898									0.604672	8.84474	10.7193	11.8749	6.71997	5.04141			9.13836	9.70949
0.0505734	0.101422	0.010356									3.69482e-12	6.41135	10.6921	8.07011	9.04429	3.86964			9.39065	11.3236
0.251563	0.00754622	0.00982752									0.471407	3.18978	5.26008	7.09203	7.65069	4.0191			9.20011	12.5796
0.122623	0.00778151	0.0047826									0.893638	3.82431	3.81248	4.45053	4.01346	8.80058			8.59845	11.5881
0.0415342	0.088619	0.184387									0.529197	6.72091	8.07183	4.64626	1.79238	10.8896			7.34331	7.57309
0.0346043	0.0322134	0.0801728									8.74892	7.52985	8.34427	6.82589	1.20005	5.45726			5.92626	6.28722
0.519934	0.160408	0.240797									4.16829	5.31822	4.5352	7.03812	6.08762	2.62942			5.22396	13.8565
0.0569875	0.0171871	0.0364821									4.53719	12.9861	1.79581	6.9853	11.7332	3.11445			4.85978	12.1115
0.0720896	0.123088	0.0785335									0.133265	6.75247	4.78066	4.64737	11.3396	4.1298			5.7179	11.5449
0.0144266	0.0192872	0.058086									0.471407	6.40151	2.87931	3.68958	6.99556	3.60808			8.91003	10.0933
0.084561	0.128755	0.109387									23.7007	2.01394	5.69005	4.51227	10.3191	6.3818			12.6564	9.02637
0.130144	0.0907416	0.0642982									24.3511	8.02336	7.1596	3.37257	3.39874	8.21546			11.5402	9.93547
0.128602	0.00705511	0.0187004									4.69236	17.1881	2.5463	6.43672	3.76884	4.96273			6.94459	11.3795
0.200594	0.0450099	0.0509266									1.73184	21.9387	1.07709	7.47656	3.45046	3.82809			6.86726	11.6376
0.0152305	0.0142344	0.164966									3.49031	25.9713	1.5392	1.53939	1.27906	7.6928			10.0006	10.793
0.0395391	0.150099	0.160816									7.05746	26.433	1.79686	3.05541	3.34501	10.9419			10.4517	10.1066
0.154554	0.00443969	0.029712									5.30264	17.9654	2.95712	7.22875	5.87154	11.4311			3.98067	11.771
0.00606373	0.0863708	0.0731892									4.60403	3.3544	3.21757	9.64038	4.41797	8.39328			3.0794	14.1616
0.0862552	0.0336786	0.0764209									7.42579	8.02227	2.60677	7.8948	1.57751	3.69161			2.62001	14.4164
0.0126632	0.0924313	0.0530882									8.70481	12.1548	5.12732	11.5204	8.09995	1.62608			1.71002	13.2571
0.0197722	0.301423	0.0191057									5.07441	13.3033	0	10.4847	8.10742	3.6033			2.97464	11.5362
0.0575924	0.0675204	0.110868									9.06287	14.5723	0	4.26633	2.68784	12.7149			4.88078	7.33788
0.26179	0.0187547	0.0533616									2.71868	15.802	0	1.9954	2.71708	17.4384			5.06459	1.21088
0.0682158	0.00722162	0.0587814									5.63624	14.9508	0.133265	3.24666	7.48153	8.90997			5.60045	7.81289
0.0390938	0.0188418	0.0397312									8.87243	10.2057	0.604672	1.53753	7.95937	2.51992			7.92813	9.10033
0.0124903	0.107092	0.0886469									9.03508	5.34228	1.36504	5.53223	5.48514	6.80993			8.68821	9.11064
0.00850837	0.0148271	0.0543501									7.60977	6.63448	1.42284	9.84923	4.44867	5.13268			6.32238	10.6351
0.0922047	0.0267511	0.0193388									7.26526	10.7276	1.84741e-12	9.37904	2.10529	3.29444			2.84542	8.56411
0.438249	0.0570122	0.00794139									7.22658	12.2722	1.42284	5.79529	1.96692	6.51271			2.34167	6.50948
0.638939	0.0446197	0.147761									6.39702	5.74093	1.36504	5.02117	3.85377	9.03209			2.9019	4.87794
0.122957	0.0112438	0.0524795									5.84477	8.42853	0.471407	5.79999	4.17351	7.94812			2.58815	1.82921
[truncated: 36,254 more rows]

## Sheet: Fig3S1_LB
Flux
D-cyc treatment		mDAP depletion
Time (min)	Flux (1/μm.s)	Time (min)	Flux (1/μm.s)
0	0.0022	0	0.0022
10	0.000274904	12.5	0.000278499
15	0.000187924	20	0.00015616
20	0.000151783	25	0.000195716
25	0.000185837	30	4.88304e-05
30	0.000105614	40	2.42163e-05
35	0.000172824	45	2.91404e-05
Track lengths (μm)														Velocities (nm/s)
steady state	D-cyc treatment (t1)	D-cyc treatment (t2)	D-cyc treatment (t3)	D-cyc treatment (t4)	D-cyc treatment (t5)	D-cyc treatment (t6)	mdap depletion (t1)	mdap depletion (t2)	mdap depletion (t3)	mdap depletion (t4)	mdap depletion (t5)	mdap depletion (t6)		steady state	D-cyc treatment (t1)	D-cyc treatment (t2)	D-cyc treatment (t3)	D-cyc treatment (t4)	D-cyc treatment (t5)	D-cyc treatment (t6)	mdap depletion (t1)	mdap depletion (t2)	mdap depletion (t3)	mdap depletion (t4)	mdap depletion (t5)	mdap depletion (t8)
0.0231928	0.0146634	0.0224099	0.0306035	0.0505898	0.023781	0.13752	0.0123827	0.0363917	0.00923553	0.0375594	0.0411219	0.0572084		11.5964	7.33172	5.74846	15.3018	14.5705	11.8905	0.527196	9.85964	1.93773	2.85282	2.92506	2.15818	18.8667
0.0349888	0.0584072	0.0464747	0.00937993	0.0678358	0.00767422	0.00523396	0.0312266	0.025606	0.0898083	0.0162313	0.0087888	0.18327		17.4944	4.6467	5.56959	4.68996	7.51416	3.83711	2.69157	4.44843	1.47483	3.66285	7.00187	3.16999	10.096
0.119726	0.0258211	0.0498476	0.0543252	0.0557308	0.00565203	0.0361656	0.0609472	0.026352	0.0100703	0.0109026	0.0520805	0.024648		16.2472	9.45839	23.2373	27.1626	3.27171	2.82601	4.23657	4.89154	4.90296	8.64038	5.7668	6.54546	17.3129
0.0113555	0.0157615	0.0587349	0.115252	0.0229411	0.0651902	0.121551	0.0705608	0.00733807	0.0789471	0.0824288	0.0443709	0.051045		13.6824	10.5257	8.58637	11.96	7.56303	1.03669	7.38434	9.51907	9.08166	2.16946	1.688	6.96131	18.1758
0.0254208	0.0519595	0.0249956	0.00563307	0.175004	0.0876373	0.0684386	0.408427	0.105035	0.0301557	0.0769155	0.0429165	0.0355895		10.0615	9.15763	11.4318	8.3614	6.90401	2.28386	14.4559	6.84937	4.71337	5.90766	5.11805	4.56463	17.1371
0.0452126	0.0412647	0.0124869	0.0367333	0.0223567	0.114313	0.0306352	0.0130706	0.0601539	0.0356583	0.0402095	0.0312285	0.0380761		6.42178	12.9106	10.2378	7.29667	7.6848	1.19877	20.17	4.3574	4.52955	4.90264	4.46572	4.3944	17.8074
0.0810294	0.0600635	0.0104128	0.0178608	0.00622344	0.0277861	0.153353	0.0290181	0.00487976	0.0231751	0.0336891	0.00462848	0.0187325		5.44816	7.88075	7.84476	9.91857	7.56974	4.11753	17.6254	3.44164	4.45857	8.03937	0.525476	5.81397	23.3595
0.836001	0.0422082	0.0120053	0.0172441	0.0280923	0.0497471	0.055491	0.0307462	0.124911	0.0905306	0.0891876	0.0509029	0.0275314		5.84443	12.9338	8.17922	11.6129	7.05355	4.05988	8.5669	2.7588	4.79466	15.1423	0.947765	5.90036	12.324
0.033879	0.0576897	0.0609325	0.0350965	0.0385055	0.0347259	0.0484155	0.0148846	0.0148924	0.0424597	0.056785	0.0535501	0.0343246		6.16191	10.1004	4.42392	9.54325	5.43307	2.92729	4.05519	4.01106	5.36955	13.426	3.90272	4.3613	12.7508
0.162966	0.0258868	0.00257914	0.0109342	0.0329119	0.0182156	0.0761818	0.0558936	0.0240937	0.0557681	0.0273935	0.0650915	0.0384142		5.67773	3.05077	6.83625	2.81654	6.94278	6.01255	7.21094	4.96334	9.0961	9.01766	5.48942	4.33656	12.8378
0.0548158	0.0114012	0.0519411	0.0469433	0.0284371	0.0729831	0.142449	0.0947963	0.0733081	0.00569008	0.0206544	0.0143185	0.0279481		12.7104	9.69913	12.1576	11.9157	7.10262	6.1494	6.48604	4.66825	1.02852	5.08429	7.53619	3.37874	17.7947
0.117934	0.00253033	0.0208925	0.0223939	0.105146	0.00811698	0.0286181	0.107657	0.0321479	0.0568593	0.00791742	0.0311532	0.0841882		6.55155	10.9378	17.9606	6.65477	11.031	3.21012	5.30064	6.58961	3.673	1.25623	0.723707	1.34204	11.3595
0.126342	0.00150326	0.00635245	0.0137974	0.0773514	0.0196292	0.0362261	0.0691061	0.0261889	0.243438	0.0222713	0.0247683	0.0557019		16.0775	12.3628	6.14362	7.01502	9.47179	2.32751	6.32358	4.38049	1.61202	3.90856	6.4429	1.59948	7.69312
0.0317959	0.11782	0.0449728	0.0296874	0.0166493	0.0160927	0.14224	0.0804164	0.0143276	0.0151275	0.0380429	0.031519	0.0190233		13.2976	11.7733	6.55962	2.79563	11.4705	3.45106	6.1276	5.1787	3.00745	3.8529	7.30072	2.55448	9.36625
0.171289	0.0466537	0.0378644	0.0112412	0.0381683	0.0139624	0.0767469	0.0673173	0.00786471	0.0212325	0.0929897	0.0712552	0.037684		10.8235	10.8004	1.75597	7.64427	6.43584	3.37372	5.07162	6.059	1.21144	1.24274	9.01266	1.02264	8.47773
0.157129	0.0248048	0.0651058	0.0593739	0.0196015	0.0287689	0.0205743	0.161865	0.0254782	0.0463566	0.0273274	0.0152704	0.042398		9.31831	4.83543	3.83953	8.62207	10.629	2.34243	3.31745	13.9275	2.52531	5.03514	9.91654	6.40216	5.52008
0.0481214	0.0111089	0.00274199	0.0180097	0.149403	0.0209059	0.102004	0.0124505	0.0284117	0.0611878	0.0092444	0.0567516	0.0897464		8.2244	5.53229	4.01203	5.87823	10.9944	2.21749	1.57406	11.5142	3.75809	4.13883	7.87174	12.9304	17.1623
0.0987274	0.0208007	0.027778	0.0247438	0.0750048	0.0183475	0.0735833	0.00949908	0.138578	0.0187609	0.0364863	0.00499084	0.0446076		8.21668	9.23542	6.24343	8.49274	11.13	3.01521	0.530436	6.41236	3.66904	4.94028	6.66417	11.5263	9.97579
0.0482137	0.0554857	0.0380801	0.0503415	0.0458999	0.0364484	0.153214	0.0110974	0.0664907	0.128025	0.0167469	0.017805	0.0693274		15.4511	8.52221	5.20638	3.25567	9.65006	3.47099	1.23773	2.19874	10.735	3.49055	8.1655	7.98119	9.25028
0.0289338	0.0223541	0.020439	0.0813773	0.0413492	0.0177323	0.0364358	0.0133849	0.0153514	0.00398917	0.0752205	0.000450595	0.0156856		20.43	12.6194	6.00266	5.46709	3.54543	2.74457	4.79778	10.9094	16.2155	1.53085	6.43791	4.51793	13.9741
0.105461	0.0365745	0.0378318	0.0491824	0.0375421	0.014205	0.0456752	0.0042312	0.00405045	0.107188	0.0130771	0.0104837	0.0947076		24.8509	3.75872	4.26703	6.56886	4.47306	3.71127	7.69846	14.3392	9.95831	4.23931	4.5912	3.1961	21.4332
0.360036	0.00169281	0.030737	0.0075557	0.0360546	0.0763361	0.0164928	0.0366919	0.0095697	0.00245935	0.00948978	0.00475656	0.0430426		27.0579	5.79109	6.96354	6.95031	7.54891	3.6852	5.6252	8.20219	3.19729	7.35534	9.84193	3.37631	20.9515
0.0367947	0.0407943	0.0340651	0.0710947	0.0466721	0.0335455	0.0390709	0.047683	0.0291531	0.0894398	0.0192396	0.0207662	0.0181499		25.4634	7.87245	6.50123	13.244	12.0482	2.10419	2.93033	1.81904	0.413715	8.86232	11.1779	9.24057	27.851
0.0177557	0.0268856	0.0156073	0.00347028	0.0478239	0.0299255	0.166832	0.105808	0.193607	0.129305	0.0244989	0.0116705	0.0116833		27.6983	9.10426	6.86528	11.1969	17.8806	1.85879	3.89019	16.0716	0.652616	6.58423	3.71339	13.0058	9.51167
0.0755799	0.0313918	0.0960964	0.0016717	0.0848287	0.0903038	0.294713	0.0187782	0.0558236	0.102487	0.011603	0.0593122	0.0477205		31.5462	3.67096	9.85695	6.89871	15.3989	2.17087	4.20254	15.2074	2.18053	4.42192	6.73713	8.51223	3.13658
0.0452546	0.0464521	0.0300914	0.00557576	0.233248	0.0940063	0.0652899	0.0195007	0.022396	0.0171205	0.15528	0.0390433	0.0268093		32.915	3.2173	11.5794	14.8437	7.41433	2.38969	3.70854	16.453	1.30399	3.24654	11.1989	11.4169	7.49272
0.415039	0.0441748	0.0427812	0.0533715	0.0163911	0.0569643	0.0246032	0.12487	0.0448458	0.03767	0.0607195	0.0170612	0.0467102		31.8143	4.42902	8.5548	5.95478	4.08325	1.79017	3.68239	19.0261	4.98811	12.8729	11.7579	5.51934	14.8947
0.0471496	0.201311	0.0205348	0.0274688	0.147209	0.0954152	0.0310545	0.00819809	0.0183685	0.00643936	0.0288245	0.0155971	0.00283358		29.3859	5.96306	6.30174	3.60766	1.36214	0.991927	1.05898	18.5211	8.36475	11.3714	6.45786	0.638913	10.7141
0.219034	0	0.00719618	0.0806733	0.007471	0.0840449	0.0831474	0.037673	0.173388	0.0142188	0.0847073	0.0352726	0.0406743		27.8107	15.0524	3.43191	15.1131	11.6896	1.01369	3.13712	15.2649	8.61427	6.16524	6.06714	5.79555	12.6791
0.139379	0.00542186	0.0162184	0.0169991	0.184748	0.139976	0.142162	0.00661338	0.0547016	0.0534063	0.055122	0.0713297	0.0277079		27.6157	10.1645	0.471407	15.0975	0.937467	2.537	6.25159	10.7851	6.73265	1.27121	2.51814	15.6143	11.3978
0.17196	0.0011361	0.0175653	0.0907284	0.0458711	0.042522	0.10063	0.0411013	0.0233596	0.0768279	0.0342722	0.0539533	0.0185072		26.086	4.90764	1.42906	6.70657	3.37467	5.07955	7.09035	8.96677	4.04581	3.7093	5.04102	2.31424	7.84348
0.214819	0.1599	0.0803423	0.0123151	0.30566	0.0264003	0.123929	0.030694	0.00447777	0.157043	0.115745	0.0645697	0.0111317		22.0102	5.98805	1.23178	7.64914	3.07713	6.58786	4.2988	10.0413	11.9124	7.45759	10.6578	11.4059	12.5569
0.109871	0.0425812	0.0269565	0.0276627	0.0813176	0.0205159	0.157644	0.0889098	0.039176	0.15491	0.173638	0.0500865	0.056306		15.7032	9.45863	0.133265	7.961	1.27799	7.23211	5.98087	8.41119	16.4507	8.59798	10.0383	14.1467	11.8887
0.0153658	0.0781674	0.0495568	0.00701901	0.0877694	0.048814	0.0360265	0.127076	0.0219951	0.0757595	0.015405	0.0296936	0.0317111		10.475	8.31827	0.760373	2.63792	3.63973	5.90134	3.52313	3.86082	10.3076	6.73126	12.2197	11.3264	11.4809
0.0691692	0.018744	0.0246112	0.0294242	0.055649	0.0499228	0.0555788	0.0347682	0.157464	0.0263814	0.0493729	0.0429911	0.135314		9.37474	4.71087	0.529197	5.46187	6.00776	3.81484	7.1181	1.70403	3.41253	3.15639	11.0172	15.8189	22.3038
0.0526113	0.00423786	0.10285	0.0049779	0.147773	0.141663	0.0133679	0.0380609	0.025109	0.0526749	0.0370982	0.0684447	0.0609333		11.1489	3.69987	0.529197	18.065	8.29073	2.05652	7.20103	1.07872	6.90043	0.668634	4.41649	6.31325	18.7089
0.549177	0.0124317	0.0342891	0.0188565	0.0340606	0.266969	0.0620171	0.127536	0.0167507	0.0417897	0.0148394	0.0149124	0.0129367		9.55757	4.65549	0.893638	8.05338	10.6253	1.254	4.78625	2.8829	7.882	2.79101	6.30699	1.87129	9.56679
0.0317773	0.00254824	0.0163887	0.0288083	0.128779	0.0484251	0.0649143	0.0393816	0.027617	0.0435357	0.138232	0.0561551	0.0317241		4.35387	4.09578	0.338142	2.53163	8.74284	0.475109	2.32399	5.93422	7.42958	2.03307	5.59093	3.43202	4.20405
0.0263252	0.0140892	0.00286415	0.00299662	0.0334704	0.0157486	0.0181948	0.0451876	0.0188789	0.0281584	0.0204184	0.170178	0.0491582		0.297157	6.12159	0.338142	30.0602	2.04292	1.68113	1.66892	6.41613	8.70143	3.9136	4.02147	4.21622	0.995515
0.00827062	0.0592704	0.120053	0.00624254	0.0764262	0.0144004	0.00566935	0.0587398	0.028002	0.0534398	0.0952818	0.129586	0.0209757		4.02378	13.2102	1.0269	14.9773	5.95634	1.99115	5.45183	2.84647	7.87989	4.53622	6.41132	6.25723	6.80641
0.0762853	0.0123297	0.045473	0.0169364	0.0164822	0.0248543	0.0804285	0.0572542	0.00392481	0.0827763	0.0208279	0.0608069	0.0555105		10.5036	15.4222	1.0006	12.3215	8.62854	1.16132	8.198	5.10548	1.80589	3.10501	7.06359	11.267	4.91543
0.383489	0.0427586	0.0718387	0.0594975	0.0195151	0.0111035	0.0852088	0.0136423	0.020167	0.0726309	0.0393917	0.00635583	0.00695734		13.0021	9.17413	0.364441	22.1372	10.632	1.32518	8.17003	7.12254	4.5755	4.00752	5.4513	13.0108	3.5024
0.0704856	0.019926	0.0107417	0.0257366	0.00505466	0.0789422	0.0399321	0.07726	0.0636229	0.143947	0.0990512	0.109586	0.0397225		10.1252	5.39837	0.266837	12.8663	7.55336	1.39876	16.4469	8.59464	5.94481	3.90795	5.94483	7.15927	8.90247
0.0127617	0.00697863	0.0617726	0.0361019	0.0190175	0.0118454	0.0223177	0.0892469	0.0318872	0.0512781	0.00477774	0.0191692	0.0576453		16.9395	10.8869	0.708713	12.0689	2.03415	3.03291	19.3302	12.6493	5.21947	4.59414	9.48555	13.5728	4.55226
0.0541228	0.0269828	0.0203968	0.0951603	0.00834214	0.0268201	0.0332536	0.0456755	0.0268583	0.0343264	0.0146952	0.0112046	0.0305119		7.57343	13.0718	25.9705	1.99824	8.38093	4.96749	15.5683	13.0868	3.2223	4.17922	2.98849	5.21128	8.19256
0.0923139	0.00843239	0.0166399	0.137936	0.0191743	0.0224209	0.0803838	0.049161	0	0.0287294	0.0163473	0.0168482	0.0439645		9.89157	14.7056	10.4463	1.00274	8.15273	6.03297	11.1063	8.54519	0.846037	5.80026	4.87862	5.34375	12.8282
0.0242992	0.0194955	0.125261	0.00323295	0.0706675	0.0463657	0.0750306	0.00820989	0	0.00770979	0.0272509	0.0152589	0.0180242		16.2	7.71602	1.01035	0.806809	5.41006	4.4212	6.92414	5.05439	1.57012	5.59934	4.21044	5.29772	9.38445
0.214738	0.0677695	0.0101517	0.0115525	0.026075	0.0136274	0.14953	0.0253124	0.107739	0.0734164	0.0127417	0.0202957	0.0371177		17.0258	3.30625	0.471407	0.422232	9.1753	0.34099	9.6988	6.00368	4.36331	3.983	6.38466	1.61089	15.8252
0.0142406	0.0147964	0.0437776	0.0477271	0.0200376	0.0282306	0.0462567	0.122326	0.00394149	0.0868785	0.00522936	0.0250253	0.052401		16.1837	8.53615	0.471407	0.555497	5.18908	4.183	11.091	6.44757	6.75458	4.17562	10.8838	2.20621	21.5213
0.00390367	0.0140476	0.0189889	0.0815126	0.127915	0.0426788	0.0583953	0.0167978	0.00599324	0.055144	0.0152096	0.112685	0.0132714		18.2755	0.75163	1.1917	0.746072	6.03927	5.91065	11.1374	7.42622	9.08893	9.94228	11.6755	4.90356	9.07495
0.00195484	0.0276238	0.00523871	0.0728723	0	0.0350634	0.0148022	0.0514519	0.0355927	0.0835932	0.192129	0.0689422	0.00923696		15.3474	8.48317	1.77454	0.47214	4.37341	3.06286	12.5395	8.66458	2.43988	6.10279	9.67802	9.75767	7.69861
0.00514966	0.0271677	0.111112	0.0325703	0.000942813	0.0807169	0.156562	0.0208343	0.0126526	0.00873763	0.0441088	0.00715032	0.00749012		12.3404	6.3529	1.72152	1.19056	4.37438	2.53278	2.78873	3.61874	11.5818	4.02879	3.17098	6.16813	1.6326
0.00726766	0.029164	0.0590385	0.0199766	0.0284179	0.018147	0.0957342	0.0134412	0.0204891	0.0298254	0.0286237	0.0153031	0.0212177		6.58206	11.4555	1.14167	0.827497	5.04156	2.60165	13.7942	5.11925	9.51825	11.5731	9.09217	5.65656	4.81283
0.422956	0.0942704	0.0170355	0.00788113	0.0729831	0.0691276	0.0498887	0.0807861	0.0401908	0.0538211	0.00504121	0.0217299	0.0117375		11.5565	17.4442	1.3053	0.530133	7.81977	1.21422	16.2435	2.3366	5.72908	17.9562	12.0904	2.90877	17.5837
0.0102304	0.0531425	0.00422765	0.0175397	0.00348914	0.0502163	0.021915	0.018102	0.0287229	0.0799107	0.00400254	0.050843	0.0357524		14.4513	14.6844	0.489881	0.894025	10.5241	1.97867	12.7345	7.71989	8.08468	13.6446	6.53505	6.36018	6.30872
0.010849	0.0299817	0.0749863	0.0104292	0.0338117	0.0465512	0.0358895	0.0871122	0.00162344	0.0424691	0.0545157	0.00910578	0.0964288		12.784	5.3384	1.23409	0.478848	12.302	3.45974	8.17194	6.85736	14.0772	4.73302	5.11398	5.90854	10.0259
0.00484085	0.00675645	0.00293165	0.0467715	0.121036	0.0849438	0.0103776	0.020437	0.0289725	0.021719	0.00456863	0.0387941	0.0470709		11.5683	12.4565	1.51806	0.571258	3.50731	3.78153	4.93616	6.7613	15.6016	4.21606	1.73107	1.99546	10.6363
0.0845252	0.00995183	0.0124522	0.0101044	0.110705	0.0434764	0.0233723	0.0383971	0.00138559	0.257844	0.0224162	0.0159581	0.0662569		8.80875	10.8811	0.318216	8.7956	4.58141	7.68993	5.92487	8.74922	8.15753	21.2299	3.64829	0.934124	7.89651
[truncated: 43,697 more rows]

## Sheet: Fig3S3A
Fig3B_growth in flasks
[truncated: 20 more rows]

## Sheet: Fig3S3B
Time [s]	0	120	240	360	480	600	720	840	960	1080	1200	1320	1440	1560	1680	1800	1920	2040	2160	2280	2400	2520	2640	2760	2880	2999.9	3119.9	3239.9	3359.9	3479.9	3599.9	3719.9	3839.9	3959.9	4079.9	4199.9	4319.9	4439.9	4559.9	4679.9	4799.9	4919.9	5039.9	5159.9	5279.9	5399.9	5519.9	5639.9	5759.9
[truncated: 49 more rows]
[truncated: 20 more columns]

[truncated: 5 more sheets: Fig3S3C, Fig3S3D, Fig3S6A, Fig3S6B, Fig3S7]
