# Supplementary material for: Class-A penicillin binding proteins do not contribute to cell shape but repair cell-wall defects
Source: eLife journal article supplement (doi:10.7554/elife.51998), 2020-01-06
Supplement: supp [file elife-51998-supp-v1.zip › elife_poa_e51998_Figure_4_source_data_1.xlsx]

## Sheet: Fig4ABC
PBP1b	PBP1a	LpoB	Replicate	Bound fraction (%)	D_free	Sigma	chi2	Number of tracks
G14	Δ	WT	A	49.626	0.0494401	0.0428879	0.00283743	6275
G14	Δ	WT	B	55.9699	0.0471942	0.037859	0.00522256	3224
G14	Δ	WT	C	47.1249	0.0517696	0.042932	0.00302165	6553
G14	Δ	WT	D	41.863	0.0556935	0.0372301	0.00475838	7964
G14	Δ	WT	E	49.0341	0.0597403	0.0358849	0.00352966	5354
G14	Δ	WT	F	44.5507	0.0441709	0.034332	0.00307708	5144
G14	RØ	WT	A	20.3705	0.0601873	0.044082	0.00245039	5485
G14	RØ	WT	B	13.3301	0.049754	0.0416743	0.00183354	4389
G14	RØ	WT	C	20.5329	0.0607816	0.0383527	0.00243401	4204
G14	RØ	WT	D	12.8582	0.0430586	0.0523529	0.00217208	7946
G14	RØ	WT	E	10.93	0.0424266	0.0512658	0.00306252	6532
G14	RØ	WT	F	14.9851	0.0464961	0.0480856	0.00203247	6219
G10	Δ	WT	A	22.9054	0.0611802	0.0501407	0.00228239	8076
G10	Δ	WT	B	26.5832	0.0542467	0.0439313	0.00282086	4537
G10	Δ	WT	C	28.066	0.0531552	0.0472428	0.00229465	6197
G10	Δ	WT	D	22.3397	0.0511801	0.0487441	0.00430725	5240
G10	Δ	WT	E	38.2034	0.0501678	0.0412281	0.00301725	6895
G10	Δ	WT	F	33.4301	0.0432051	0.0414928	0.00402572	4798
G10	R18	Δ	A	6.26688	0.0454705	0.0458004	0.00168296	5842
G10	R18	Δ	B	5.81756	0.0470106	0.0552026	0.00187143	8528
G10	R18	Δ	C	12.7808	0.0625767	0.0364777	0.00188753	4769
G10	R18	Δ	D	7.04973	0.0486975	0.0412215	0.00167433	8265
G10	R18	Δ	E	17.633	0.05535	0.040433	0.00218448	6625
G10	R18	Δ	F	4.76008	0.0457384	0.0506514	0.00178266	7162
G10	R18	Δ	G	7.56326	0.0452885	0.0409266	0.00141399	7861
G10	R18	WT	A	13.6263	0.0482749	0.040811	0.00169793	5288
G10	R18	WT	B	12.1669	0.0550623	0.0486568	0.00168059	7852
G10	R18	WT	C	23.0102	0.0470842	0.0387239	0.00209571	4723
G10	R18	WT	D	15.1412	0.0543431	0.0472786	0.00168312	7541
G10	R18	WT	E	20.2125	0.0462295	0.0405474	0.00227125	4608
G10	R18	WT	F	19.2015	0.0506086	0.0404104	0.00201739	8239
G10	R18	WT	G	17.1169	0.0462614	0.046903	0.00183857	7325
G10	R18	High	A	29.7024	0.0443297	0.0419779	0.00347894	5355
G10	R18	High	B	36.0822	0.0406485	0.0329963	0.00227894	3772
G10	R18	High	C	33.7327	0.0390307	0.0370576	0.00264033	4516
GØ	Δ	WT	A	17.2803	0.0531602	0.0537628	0.00196615	6510
GØ	Δ	WT	B	20.1002	0.0469384	0.051273	0.00181934	6680
GØ	Δ	WT	C	23.5411	0.0534761	0.0520989	0.00192172	5876
GØ	Δ	WT	D	20.7511	0.0406843	0.0408613	0.00239331	8411
GØ	Δ	WT	E	21.2055	0.0406352	0.0423869	0.00155885	10406
GØ	Δ	WT	F	18.6198	0.0391598	0.0393204	0.00274009	4743

## Sheet: Fig4D
Sample	Time (min)	Bound fraction (%)	D_free	Number of tracks
0	-16	19.482	0.091457	5904
0	-15.2813	19.1494	0.0963926	5138
0	-14.1397	23.1533	0.091433	9919
0	-13.4799	23.7338	0.0763782	6936
0	-12.8207	24.215	0.0902957	7567
0	-12.1888	21.5551	0.0937536	12922
0	-11.57	20.4731	0.0951932	10682
0	-10.9844	21.2869	0.0853013	6448
0	-10.3469	19.6908	0.0937825	10313
0	-9.44565	21.3219	0.0876172	9624
0	-7.81655	23.5155	0.0755336	4466
0	-7.0764	28.6164	0.0740255	4894
0	-5.98499	20.6406	0.0694397	5090
0	-3.90687	20.9282	0.0843145	7060
0	-3.22195	22.9962	0.0798104	3813
0	-2.39747	23.5055	0.0761109	6642
15	18	26.3696	0.0973638	20421
15	24.5442	24.827	0.0975723	20410
15	25.9957	24.1151	0.0908496	19233
15	27.0942	26.8925	0.095432	22545
15	27.7007	25.3505	0.0977738	30315
15	28.3628	25.5043	0.0916772	13944
15	18.5633	27.2022	0.095462	26104
15	19.3336	26.1452	0.092202	46856
15	19.9004	26.1666	0.0867729	28027
15	20.6314	25.1624	0.0936338	31401
15	21.2594	24.4323	0.0943235	41064
15	22.1142	23.804	0.0940658	9528
15	22.9338	24.583	0.0914275	9586
15	23.5275	21.9601	0.100124	9776
30	30.5511	35.8436	0.0700531	10741
30	41.1949	36.5531	0.078177	21386
30	41.9378	37.7197	0.0722682	7011
30	31.6536	38.8903	0.0745996	15591
30	33.581	40.9904	0.0792632	14368
30	34.1812	36.6982	0.0861556	24303
30	34.9714	37.2263	0.072668	16599
30	37.5949	39.6776	0.0876991	13434
30	38.7163	40.3514	0.0597402	7501
30	39.6585	38.481	0.0740085	10162
30	40.373	33.8684	0.0964421	17569

## Sheet: Fig4E
Sample	Time (min)	Bound fraction (%)	D_free	Number of tracks
0	4	35.5165	0.0741725	6650
0	4.65413	43.6255	0.0532473	3745
0	5.22763	34.1006	0.074726	5129
0	5.81384	33.6675	0.0750255	5728
0	6.32059	32.3197	0.0788384	5295
0	6.82257	29.1739	0.0804244	4510
0	7.3651	32.256	0.0702971	3051
0	7.84767	31.2526	0.0801101	4399
0	8.38214	27.7342	0.0842934	5334
0	8.94853	27.6162	0.0815183	3722
0	9.74211	29.0581	0.0799237	3026
0	10.3455	25.0368	0.0943916	4923
0	11.4497	30.6442	0.081221	3441
0	11.9972	26.9374	0.0906848	5827
5	2	32.6375	0.0704129	5210
5	2.94629	36.9978	0.0645504	3818
5	3.83949	38.2352	0.0708216	4830
5	4.34082	33.4122	0.0760444	5390
5	4.98529	39.7696	0.0624887	3950
5	5.84427	31.4977	0.0842336	6360
5	6.88407	35.8893	0.0738896	4112
5	7.97038	28.7878	0.0766831	4779
5	8.52585	28.7834	0.0809268	4860
5	9.07893	33.5718	0.0733124	3624
5	9.68538	29.4585	0.078521	5278
5	10.2026	27.9441	0.0831693	5737
5	10.8128	28.3115	0.0808336	5875
5	11.5327	27.6171	0.0809439	4579
5	12.0847	29.6784	0.0855479	4467
5	13.2362	25.9695	0.0937006	4364
15	17	25.342	0.0985023	48862
15	17.7362	28.0711	0.088373	28520
15	18.4282	26.6007	0.0928172	23507
15	19.4236	24.2586	0.0968698	46950
15	20.1301	24.8972	0.0902755	25701
15	21.1163	23.9685	0.0930151	21029
15	21.6886	24.5623	0.0871024	11246
15	22.3793	22.9901	0.0914107	26818
15	22.9024	24.3192	0.0945606	20361
15	23.5308	24.1511	0.0957159	22005
15	24.2659	24.8107	0.0968092	17167
15	24.9206	23.672	0.099144	25314
15	25.8939	21.574	0.085085	13699
15	26.4835	23.2534	0.0892674	13005
15	27.2205	22.5119	0.0820695	10925
30	32.0971	23.0092	0.104241	21433
30	32.9348	24.8142	0.0903937	10117
30	33.7073	22.9332	0.0945751	15527
30	34.4461	21.1018	0.0975504	33729
30	35.1838	21.2282	0.0992959	27105
30	35.8853	22.4806	0.0960735	40934
30	37.4109	20.7338	0.0744751	11377
30	38.1135	20.9462	0.0972241	34634
30	38.7602	20.5558	0.0974684	19343
30	39.6674	21.095	0.0950401	35410
30	40.4779	20.8126	0.0991354	19877
30	41.1686	20.5544	0.0987031	34458
30	42.5178	21.8566	0.0831909	17814
30	43.3244	21.2742	0.0986793	29958

## Sheet: Fig4S4
PBP1b	PBP1a	LpoB	Replicate	Bound fraction (%)
130 (WT)	280	WT	A	21.1
130 (WT)	280	WT	B	20.2
130 (WT)	280	WT	C	18.0
130 (WT)	280	Δ	A	8.0
130 (WT)	280	Δ	B	7.1
130 (WT)	280	Δ	C	6.7
130 (PBP1b*)	280	Δ	A	9.3
130 (PBP1b*)	280	Δ	B	8.9
130 (PBP1b*)	280	Δ	C	9.6
