# Supplementary material for: Class-A penicillin binding proteins do not contribute to cell shape but repair cell-wall defects
Source: eLife journal article supplement (doi:10.7554/elife.51998), 2020-01-06
Supplement: supp [file elife-51998-supp-v1.zip › elife_poa_e51998_Supplementary_file_1.xlsx]

## Sheet: Sheet1
Strains	Name	Genotype	Construction		Reference
	LC69	186::Ptet-dcas9			Cui et al., 2018
	AV03	186::Ptet-dcas9, HK022::P, λ::P			Vigouroux et al., 2018
	AV04	186::Ptet-dcas9, λ::P-mcherry			Vigouroux et al., 2018
	AV08	186::Ptet-dcas9, mrdA::mcherry-mrdA			Vigouroux et al., 2018
	AV29	186::Ptet-dcas9, ΔmrcB	LC69/P1(ΔmrcB)
	AV31	186::Ptet-dcas9, mrcB::msfgfp-mrcB	LC69/pAV42
	AV44	186::Ptet-dcas9, mrcB::msfgfp-mrcB, mrcA::mcherry-mrcA	AV31/pAV43
	AV47	186::Ptet-dcas9, HK022::P-msfgfp, λ::P-mcherry	AV03/P1(pLC143)
	AV50	186::Ptet-dcas9, mrcA::mcherry-mrcA, ΔmrcB	AV44/P1(ΔmrcB)
	AV51	186::Ptet-dcas9, mrcB::msfgfp-mrcB, ΔmrcA	AV44/P1(ΔmrcA)
	AV58	186::Ptet-dcas9, mrcB::msfgfp-mrcB, ΔmrcA, HK022::Para-msfgfp-mrcB	AV51/pAV71
	AV63	186::Ptet-dcas9, mrcA::mcherry-mrcA, ΔmrcB, HK022::Para-mCherry-mrcA	AV50/pAV77
	AV67	186::Ptet-dcas9, mrcB::msfgfp-mrcB, mrcA::mcherry-mrcA, ΔpbpC	AV44/P1(ΔpbpC)
	AV80	186::Ptet-dcas9, mrcB::msfgfp-mrcB, mrcA::mcherry-mrcA, ΔpbpC, ΔmtgA	AV67/P1(ΔmtgA)
	AV84	186::Ptet-dcas9, mrcB::msfgfp-mrcB, mrcA::mcherry-mrcA, ΔpbpC, ΔmtgA, ΔlysA	AV80/P1(ΔlysA)
	AV88	186::Ptet-dcas9, mreB::mreB-msfGFP			Dion et al., 2019
	AV92	186::Ptet-dcas9, mrcB::msfgfp-mrcB, mrcA::mcherry-mrcA, ΔpbpC, ΔmtgA, ΔmscS	AV80/P1(ΔmscS)
	AV93	186::Ptet-dcas9, mrcB::msfgfp-mrcB, mrcA::mcherry-mrcA, ΔpbpC, ΔmtgA, ΔmscS, ΔmscL	AV92/P1(ΔmscL)
	AV100	186::Ptet-dcas9, ΔmrcA, ΔmrcB, HK022::Para-msfgfp-mrcB	AV58/P1(ΔmrcB)
	AV101	186::Ptet-dcas9, ΔmrcA, ΔmrcB, HK022::Para-mcherry-mrcA	AV63/P1(ΔmrcA)
	AV105	186::Ptet-dcas9, ΔmrcB, mrcA::mcherry-mrcA, ΔpbpC, ΔmtgA, ΔlysA	AV93/P1(ΔmrcB)
	AV109	186::Ptet-dcas9, mrcB::msfgfp-mrcB, mrcA::mcherry-mrcA, ΔlpoA	AV44/P1(ΔlpoA)
	AV110	186::Ptet-dcas9, mrcB::msfgfp-mrcB, mrcA::mcherry-mrcA, ΔlpoB	AV44/P1(ΔlpoB)
	AV124	186::Ptet-dCas9, mrcB::msfgfp-mrcB(E313D)	LC69/pAV98
	AV128	186::Ptet-dCas9, mrcB::msfgfp-mrcB(E313D), ΔlpoB	AV124/P1(ΔlpoB)
	AV130	186::Ptet-dCas9, mrcB::msfgfp-mrcB(E313D), mrcA::mcherry-mrcA, ΔlpoB	AV128/pAV43
	NO34	mreB::mreB-msfgfpsw-kanR			Ouzounov et al., 2016
	B150	ΔmrcB	MG1655/P1(ΔmrcB)
	B151	FB83, asd-1			Teeffelen et al., 2011
	B157	FB83, asd-1, ΔmrcB	B151/P1(ΔmrcB)
	B172	mreB::mreB-msfgfpsw-kanR	MG1655/P1(NO34)
	B174	ΔmrcB, mreB::mreB-msfgfpsw-kanR	B150/P1(NO34)
	B176	FB83, asd-1, mreB::mreB-msfgfpsw-kanR	B151/P1(NO34)
	B178	FB83, asd-1, ΔmrcB, mreB::mreB-msfgfpsw-kanR	B157/P1(NO34)
Plasmids	Name	Description	Assembly		Reference
	pAV10	PPhlF-Cas9 and sgRNA cutting cat			Vigouroux et al., 2018
	pAV20	Cloning vector for 2 sgRNAs			Dion et al., 2019
	pAV42	Integrate msfgfp-mrcB in native locus	R62 + R63 + R27
	pAV43	Integrate mcherry-mrcA in native locus	R64 + R65 + R66 + R23
	pAV71	Integrate Para-msfgfp-mrcB in attBHK022	D1+R97+R98
	pAV77	Integrate Para-mcherry-mrcA in attBHK022	D1+R97+R105
	pAV93	PT7-msfGFP	R119+R120
	pAV98	Integrate msfgfp-mrcB(E313D) in native locus	R126 + R127 + R128
	pBC01	pAM238-Plac-lpoB	D10+R150
	pBC03	pBAD33-Para-mrcB			Gray et al., 2015
	pAM238	Spec-resistant vector with Plac			Kadokura et al., 2002
	pHC942	Template for msfgfp-mrcB			Cho et al., 2016
	pLC143	Integrate PTet75-dCas9 in attB186			Cui et al., 2018
	pE-FLP	Flippase			St-Pierre et al., 2013
PCR fragments	Name	Template	Primer 1	Primer 2	Reference
	R23	pSW23t	V101	V102	Demarre et al., 2005
	R27	pSW23t	V109	V110	Demarre et al., 2005
	R62	MG1655	V111	V234
	R63	pHC942	V233	V116	Cho et al., 2016
	R64	MG1655	V103	V238
	R65	AV04	V235	V236	Vigouroux et al., 2018
	R66	MG1655	V237	V108
	R97	pBAD30	V317	V318	Guzman et al., 1995
	R98	AV44	V319	V320	This work
	R105	AV44	V322	V341	This work
	R119	AV44	V375	V376	This work
	R120	pET23a	V377	V378	Novagen
	R126	pAV42	V391	V392	This work
	R127	MG1655	V340	V390
	R128	MG1655	V393	V339
	R150	MG1655	BC1	BC2
	R151	MG1655	BC2	BC3
Digestions	Name	Enzyme 1	Enzyme 2	Substrate	Reference
	D1	EcoRI	PstI	pIT5-KH	St-Pierre et al., 2013
	D10	SacI	BamHI	pAM238	Kadokura et al., 2002
	D11	SacI	XbaI	pAM238	Kadokura et al., 2002
Oligos used for PCR	Name	Sequence
	V101	TGGTGGCTGGCACAAGTGCCCTCCAGCTTTTGTTCCCTTTAGTGAGGGTTAATTGC
	V103	TGATATCGAATTCCTGCAGCCGCGGTAATGCTTGTTGTCAG
	V109	AAGGTAAAAGATCTCTCCGGCTCCAGCTTTTGTTCCCTTTAGT
	V111	GATATCGAATTCCTGCAGCCCGAAGAGCCGCCACGGAT
	V233	GATGACTATGAGGATGAAGAACCGATGAGTAAAGGTGAAGAACTGTTCACCGGTG
	V235	ATGAAACTAAATGGGAAATTTCCAGTGGTTTCCAAGGGCGAGGAG
	V237	ATGGATGAGCTGTACAAAGGATCCAAGTTCGTAAAGTATTTTTTGATCCTTGCAG
	V315	GGTACCGGGCCCCCCCTCGAGGTCGATTTGAGTAGAAAACGCAGCGGATGCAGGCCGTCGTTACCCAAG
	V316	TGCTGCCGGTGCCATGCCCTCCGGAACCGGTGGAGAGGACGGTCAGCTGG
	V317	CGCCATAAACTGCCAGGAATTGGGGATCGGGTTACCAATTATGACAACTTGACGGCTAC
	V318	CGGGTATGGAGAAACAGTAGAGAG
	V319	TCGCAACTCTCTACTGTTTCTCCATACCCGTGCGGAGAAAAAGCATGGCCGG
	V322	AGGCGCCATGCATCTCGAGGCATGCCTGCATAATCAGAACAATTCCTGTGCCTCG
	V339	CTTGAGCTGTATATGAACGACGTGTATCTCGGTCAGAGC
	V340	GCTCTGACCGAGATACACGTCGTTCATATACAGCTCAAG
	V390	CGGCATGGATGAGCTCTACAAAGGATCCCCGCGCAAAGGTAAGGGC
	V391	GCCCTTACCTTTGCGCGGGGATCCTTTGTAGAGCTCATCCATGCCG
	V392	GAAGAGCAGCGTTATGCTATTGCTCCAGCTTTTGTTCCCTTTAGTG
	V393	CACTAAAGGGAACAAAAGCTGGAGCAATAGCATAACGCTGCTCTTC
	BC1	TATATAGAGCTCAGGAGGAATTCACCATGACAAAAATGAGTCGCTACG
	BC2	TATATAGGATCCTTATTGCTGCGAAACGGC
Oligos inserted in pAV20	Name	Sequence	Guide	Target	Complementarity
	V274	ctagtGTGGTGCTTGAGAGAATTTGgt	G10	GFP	10bp
	V282	taaaacCAAATTCTCTCAAGCACCACa	G10	GFP	10bp
	V273	ctagtGTGGTGGAACAGAGAATTTGgt	G14	GFP	14bp
	V281	taaaacCAAATTCTCTGTTCCACCACa	G14	GFP	14bp
	V272	ctagtCACCACGAACAGAGAATTTGgt	G20	GFP	20bp
	V280	taaaacCAAATTCTCTGTTCGTGGTGa	G20	GFP	20bp
	V275	ctagtGTGGTGCTTGTCTCTATTTGgt	GØ	GFP	5bp
	V283	taaaacCAAATAGAGACAAGCACCACa	GØ	GFP	5bp
	V278	tagtAGACCCACGCTTCATACGGA	R11	RFP	11bp
	V286	aaacTCCGTATGAAGCGTGGGTCT	R11	RFP	11bp
	V277	tagtAGTGGGTGCCTTCATACGGA	R18	RFP	18bp
	V285	aaacTCCGTATGAAGGCACCCACT	R18	RFP	18bp
	V276	tagtTCTGGGTGCCTTCATACGGA	R20	RFP	20bp
	V284	aaacTCCGTATGAAGGCACCCAGA	R20	RFP	20bp
	V279	tagtAGACCCACGGAAGTAACGGA	RØ	RFP	5bp
	V287	aaacTCCGTTACTTCCGTGGGTCT	RØ	RFP	5bp
