# Supplementary material for: Class-A penicillin binding proteins do not contribute to cell shape but repair cell-wall defects
Source: eLife journal article supplement (doi:10.7554/elife.51998), 2020-01-06
Supplement: supp [file elife-51998-supp-v1.zip › elife_poa_e51998_Table_1_source_data_1.xlsx]

## Sheet: SDS-page
Replicates
GEL1		Nb of molecules / cell	% of rel. Residual expression
	AV44 S5"C"	658.408	100
	AV51 S14 "D"	83.4217	12.6702
	AV44 S14-20 "Q"	40.961	6.22122
GEL2		Nb of molecules / cell	% of rel. Residual expression
	AV44 S5"C"	815.589	100
	AV51 S14 "D"	56.0655	6.87424
	AV44 S14-20 "Q"	34.2679	4.20162
GEL3		Nb of molecules / cell	% of rel. Residual expression
	AV44 S5"C"	591.212	100
	AV51 S14 "D"	62.7164	10.6081
	AV44 S14-20 "Q"	45.0528	7.62042
Average		Nb of molecules / cell	% of rel. Residual expression (% of averaged mol/cell)	% of rel. Residual expression (average of residual expression)
	AV44 S5"C"	688.403	100	100
	AV51 S14 "D"	67.4012	9.79095	10.0509
	AV44 S14-20 "Q"	40.0939	5.82419	6.01442

## Sheet: SDS-page_raw
GEL1		Area	Mean	Min	Max	Intdens	Rawintdens	Intdens corrected	Rel %	Cell correspond number	nb of molecules	int/molecule	Nb mol/cell	Rel %
	GFP pur. 1/2000	0.212625	17634	6708	64294	3749.43	599908326	1873.91	100		2.17979e+11	8.59677e-09
	GFP pur. 1/4000	0.212625	14266.2	8040	40929	3033.34	485334998	855.153	45.6346		1.08989e+11	7.8462e-09
	GFP pur. 1/8000	0.212625	13007.8	8161	30178	2765.78	442524215	496.716	26.5069		5.44947e+10	9.11494e-09
	L69 pAV20 GØ-RØ	0.212625	8020.42	6147	22244	1705.34	272854672	0
	AV51 pAV20 G14-RØ	0.212625	8641.99	6465	14067	1837.5	294000457	132.161			15216115600		83.4217	12.6702
	AV44 pAV20 GØ-RØ	0.212625	13574.5	6208	50211	2886.28	461804425	1180.94		182400000	120093595600		658.408	100
	AV44 pAV20 G14-R20	0.212625	8277.74	5966	23546	1760.05	281608728	54.7129			7.47129e+09		40.961	6.22122
	GFP pur. 1/2000 bg	0.212625	8820.75	6223	11947	1875.51	300081990
	GFP pur. 1/4000 bg	0.212625	10244.3	7995	17474	2178.19	348510488
	GFP pur. 1/8000 bg	0.212625	10671.7	8858	18261	2269.06	363049666
	L69 pAV20 GØ-RØ bg	0.212625	8304.13	6390	11826	1765.67	282506568
	AV51 pAV20 G14-RØ bg	0.212625	8406.74	6284	14309	1787.48	285997204
	AV44 pAV20 GØ-RØ bg	0.212625	8451.41	6602	16217	1796.98	287516911
	AV44 pAV20 G14-R20 bg	0.212625	8145.84	5890	13976	1732.01	277121532
GEL2		Area	Mean	Min	Max	Intdens	Rawintdens	Intdens corrected	Rel %	Cell correspond number	nb of molecules	int/molecule	Nb mol/cell	Rel %												Intdens corrected	nb of molecules
	GFP pur. 1/2000	0.1827	12786.4	2668	53886	2336.08	373772193	1597.27	100		2.17979e+11	7.32763e-09													GFP 1/2000	1597.27	2.17979e+11
	GFP pur. 1/4000	0.1827	7247.04	2780	26830	1324.03	211845441	637.52	39.9131		1.08989e+11	5.84937e-09													GFP 1/4000	637.52	1.08989e+11
	GFP pur. 1/8000	0.1827	4654.2	2254	14805	850.321	136051438	260.434	16.3049		5.44947e+10	4.77906e-09													GFP 1/8000	260.434	5.44947e+10
	L69 pAV20 GØ-RØ	0.1827	2854.73	2066	15933	521.56	83449603	0
	AV51 pAV20 G14-RØ	0.1827	13793.9	2141	29235	2520.14	403222703	1998.58		247500000	201858187500		815.589	100
	AV44 pAV20 GØ-RØ	0.1827	3504.77	1991	65535	640.322	102451543	118.762			13876212500		56.0655	6.87424
	AV44 pAV20 G14-R20	0.1827	3209.49	2179	16459	586.373	93819696	64.8131			8481308100		34.2679	4.20162
	GFP pur. 1/2000 bg	0.1827	4043.83	2968	65535	738.807	118209150
	GFP pur. 1/4000 bg	0.1827	3757.6	2442	18563	686.514	109842246
	GFP pur. 1/8000 bg	0.1827	3228.72	2367	4659	589.888	94382035
	L69 pAV20 GØ-RØ bg	0.1827	2965.98	2104	45732	541.884	86701474
	AV51 pAV20 G14-RØ bg	0.1827	3312.6	2179	26755	605.212	96833845
	AV44 pAV20 GØ-RØ bg	0.1827	2956.79	2141	36037	540.206	86432926
	AV44 pAV20 G14-R20 bg	0.1827	3178.76	2217	6613	580.76	92921591
GEL3		Area	Mean	Min	Max	Intdens	Rawintdens	Intdens corrected	Rel %	Cell correspond number	nb of molecules	int/molecule	Nb mol/cell	Rel %
	GFP pur. 1/2000	0.217688	10092.7	2122	51645	2197.06	351529655	1519.15	100		2.17979e+11	6.96925e-09
	GFP pur. 1/4000	0.217688	6325.23	1933	28181	1376.92	220307904	807.178	53.1336		1.08989e+11	7.40602e-09
	GFP pur. 1/8000	0.217688	3983.39	1485	15871	867.134	138741379	371.366	24.4457		5.44947e+10	6.81471e-09
	L69 pAV20 GØ-RØ	0.217688	1747.33	1273	2924	380.371	60859434	0
	AV51 pAV20 G14-RØ	0.217688	8377.24	1344	21106	1823.62	291779332	1443.25		247500000	146324936200		591.212	100
	AV44 pAV20 GØ-RØ	0.217688	2368.51	1344	5919	515.595	82495126	135.223			15522307500		62.7164	10.6081
	AV44 pAV20 G14-R20	0.217688	2167.68	1438	3301	471.877	75500347	91.5057			11150570600		45.0528	7.62042
	GFP pur. 1/2000 bg	0.217688	3114.15	2051	65535	677.912	108465937
	GFP pur. 1/4000 bg	0.217688	2617.27	1910	6956	569.747	91159453
	GFP pur. 1/8000 bg	0.217688	2277.43	1603	4457	495.768	79322866
	L69 pAV20 GØ-RØ bg	0.217688	1828.16	1297	3348	397.967	63674741
	AV51 pAV20 G14-RØ bg	0.217688	2016.13	1391	6650	438.887	70221841
	AV44 pAV20 GØ-RØ bg	0.217688	1875.97	1367	2947	408.375	65340049
	AV44 pAV20 G14-R20 bg	0.217688	2076.49	1438	12640	452.027	72324300

## Sheet: DIA_and_PRM
	DIA - PBP1a
	Strain	System - Guide	Replicate	Sum quantity - Protein group	Mean Sum quantity - Protein group	PBP1a fold change*
	LC69	pAV20 GØ-RØ	1	194613	199270	100
			2	203927
	AV44	pAV20 GØ-RØ	1	1.79863e+06	2.66515e+06	1337.46
			2	3.53168e+06
	AV44	pAV20 G14-R20	1	37649.4	40154.1	20.1506
			2	42658.8
	AV51	pAV20 G14-RØ	1	ND
			2	ND
* PBP1a normalized with respect to PBP1a levels in the L69 strain
	DIA - PBP1b
	Strain	System - Guide	Replicate	Sum quantity - Protein group	Mean Sum quantity - Protein group	PBP1b fold change**
	LC69	pAV20 GØ-RØ	1	662221	651248	100
			2	640276
	AV44	pAV20 GØ-RØ	1	2242080	2.38968e+06	366.939
			2	2537289
	AV44	pAV20 G14-R20	1	170479	177880	27.3137
			2	185281
	AV51	pAV20 G14-RØ	1	198526	213474	32.7792
			2	228422
* PBP1b normalized with respect to PBP1b levels in the L69 strain
	PRM - PBP1b
	Strain	System - Guide	Replicate	Peptide 1 - LLEATQYR_2 total Area L	Peptide 1 - pmol L calculated	Peptide 2 - TVQGASTLTQQLVK_2 total Area L	Peptide 2 - pmol L calculated	Average pmol measured for PBP1B	Absolute number of PBP1b mol/cell	Mean Absolute number of PBP1b mol/cell	PBP1b fold change**
	LC69	pAV20 GØ-RØ	1	60488076	0.00129304	69046192	0.00139701	0.00134503	141.7	165.65	100
			2	64086052	0.00175064	53826428	0.00184795	0.0017993	189.6
	AV44	pAV20 GØ-RØ	1	222484224	0.00489904	175173936	0.00591342	0.00540623	569.5	547.2	330.335
			2	195043888	0.00487437	212068288	0.00509029	0.00498233	524.9
	AV44	pAV20 G14-R20	1	48138	0.000776918	7867957	0.000472138	ND
			2	18970446	0.00040781	20332594	0.000472981	0.000440395	46.3956	46.3956	28.0082
	AV51	pAV20 G14-RØ	1	17640334	0.000445015	19028810	0.000512953	0.000478984	50.461	55.8031	33.6874
			2	18080708	0.00056009	22425324	0.000600712	0.000580401	61.1452

## Sheet: GFP-PBP1b_Fluo
Strain	Guide PBP1b	Guide PBP1a	Form	Replicate	Fluorescence
AV44	G20	RØ	sgRNA	A	1.07103
AV44	G20	RØ	sgRNA	B	0.996139
AV44	G20	RØ	sgRNA	C	1.04288
AV51	G20	RØ	crRNA	A	2.26972
AV51	G20	RØ	crRNA	B	6.27022
AV51	G20	RØ	crRNA	C	3.69232
AV51	G14	RØ	sgRNA	A	-0.236909
AV51	G14	RØ	sgRNA	B	1.20268
AV51	G14	RØ	sgRNA	C	1.02665
AV51	G14	RØ	crRNA	A	9.85173
AV51	G14	RØ	crRNA	B	15.5349
AV51	G14	RØ	crRNA	C	10.611
AV51	G10	RØ	crRNA	A	33.2838
AV51	G10	RØ	crRNA	B	38.7309
AV51	G10	RØ	crRNA	C	35.1706
AV51	GØ	RØ	crRNA	A	100.243
AV51	GØ	RØ	crRNA	B	105.237
AV51	GØ	RØ	crRNA	C	94.5192
AV44	GØ	RØ	crRNA	A	82.2859
AV44	GØ	RØ	crRNA	B	102.322
AV44	GØ	RØ	crRNA	C	107.603
AV58	GØ	RØ	crRNA	A	444.031
AV58	GØ	RØ	crRNA	B	537.401
AV58	GØ	RØ	crRNA	C	546.89

## Sheet: RFP-PBP1a_Fluo
Strain	Guide PBP1b	Guide PBP1a	Form	Replicate	Fluorescence
AV44	GØ	R20	sgRNA	A	-32.8544
AV44	GØ	R20	sgRNA	B	18.6919
AV44	GØ	R20	sgRNA	C	7.18875
AV50	GØ	R20	crRNA	A	0.962368
AV50	GØ	R20	crRNA	B	0.83664
AV50	GØ	R20	crRNA	C	7.75794
AV50	GØ	R18	crRNA	A	16.1629
AV50	GØ	R18	crRNA	B	21.9416
AV50	GØ	R18	crRNA	C	24.162
AV50	GØ	R11	crRNA	A	39.0376
AV50	GØ	R11	crRNA	B	50.1683
AV50	GØ	R11	crRNA	C	49.9817
AV50	GØ	RØ	crRNA	A	94.1558
AV50	GØ	RØ	crRNA	B	97.9907
AV50	GØ	RØ	crRNA	C	107.854
AV44	GØ	RØ	crRNA	A	101.269
AV44	GØ	RØ	crRNA	B	99.188
AV44	GØ	RØ	crRNA	C	99.5427
AV63	GØ	R18	crRNA	A	101.47
AV63	GØ	R18	crRNA	B	117.359
AV63	GØ	R18	crRNA	C	128.705
AV63	GØ	R11	crRNA	A	342.698
AV63	GØ	R11	crRNA	B	342.626
AV63	GØ	R11	crRNA	C	380.432
AV63	GØ	RØ	crRNA	A	644.916
AV63	GØ	RØ	crRNA	B	684.925
AV63	GØ	RØ	crRNA	C	744.201
