# Supplementary material for: Class-A penicillin binding proteins do not contribute to cell shape but repair cell-wall defects
Source: eLife. 2020 Jan 6;9:e51998. doi: 10.7554/eLife.51998 (PMC7002073; doi:10.7554/eLife.51998)
Supplement: Supplementary file 2. — Strains AV84 and AV105 are seen in Figure 2. MG1655 with or without D-cycloserine is seen in Figure 3. [file elife-51998-supp2.xlsx]

## Sheet: Sheet1
Condition	Replicate	Monomers (%)	Dimers (%)	Trimers (%)	Crosslink (%)	Anhydro (%)	Glycans (units)
AV84 GØ-RØ	1	63	32.8	4.2	41.2	4.6	21.9
AV84 GØ-RØ	2	59.4	35	5.5	46.1	8.3	12.1
AV84 GØ-RØ	3	59.7	34.6	5.7	46.1	5.7	17.4
AV84 G14-20	1	68.9	28.9	2.2	33.3	2	49.2
AV84 G14-20	2	66.5	30.5	3	36.5	3.9	25.8
AV84 G14-20	3	67.7	29.9	2.3	34.6	2.5	39.9
AV84 G20-RØ	1	61.4	33	5.5	44.1	7.2	13.8
AV84 G20-RØ	2	62.5	33	4.4	41.9	5.7	17.6
AV84 G20-RØ	3	62.5	33.3	4.2	41.7	5.6	17.9
AV105 GØ-RØ	1	65.4	30.7	3.9	38.4	4.6	21.6
AV105 GØ-RØ	2	62.3	33.2	4.5	42.1	5.6	18
AV105 GØ-RØ	3	61.8	33.9	4.3	42.6	5.5	18.3
MG1655 untreated	1	66	27.6	6.5	40.5	4.5	22.1
MG1655 untreated	2	69.9	24.1	6.1	36.2	4	25.3
MG1655 untreated	3	71.1	22.9	5.9	34.8	4.2	23.5
MG1655 D-cyc	1	75.9	21.7	2.4	26.5	4.4	22.5
MG1655 D-cyc	2	76.1	21.5	2.5	26.4	4.3	23.1
MG1655 D-cyc	3	75.7	22.4	1.9	26.2	4.4	22.6
