# Supplementary figures and images for: Class-A penicillin binding proteins do not contribute to cell shape but repair cell-wall defects
Source: eLife journal article supplement (doi:10.7554/elife.51998), 2020-01-06

**A**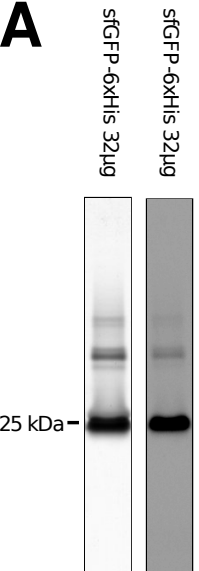**B**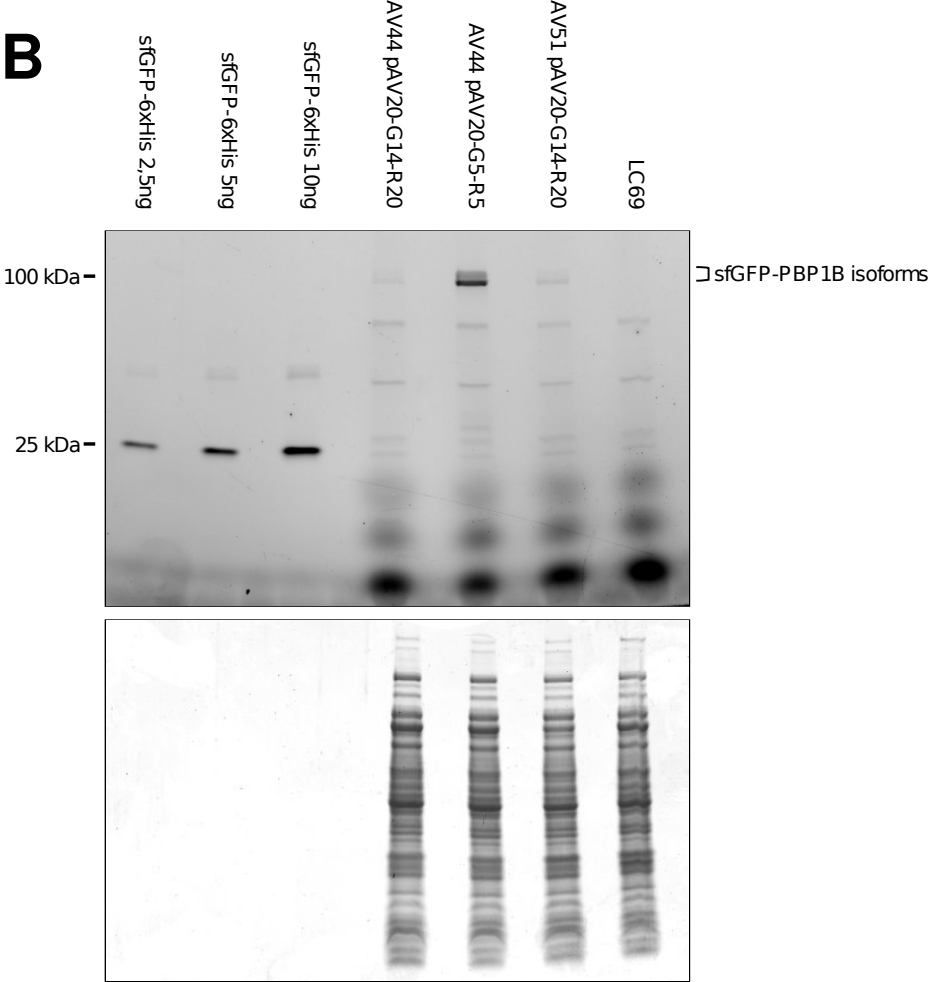

Supplement: supp [file elife-51998-supp-v1.zip]

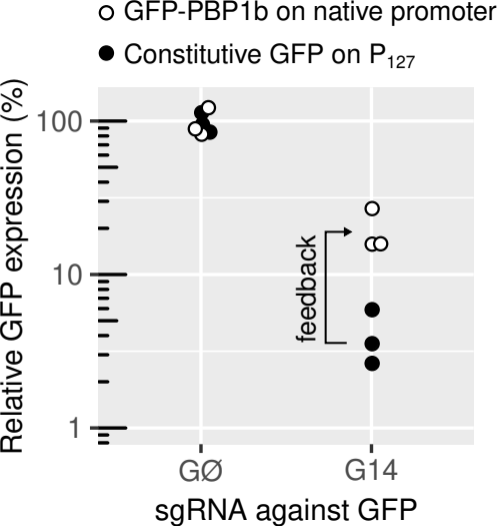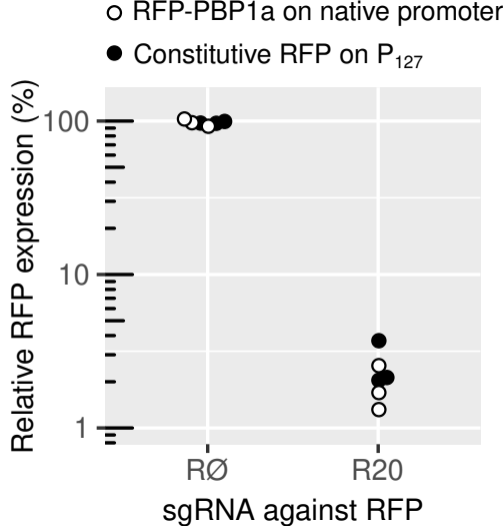

Supplement: supp [file elife-51998-supp-v1.zip]

PBP1b never induced

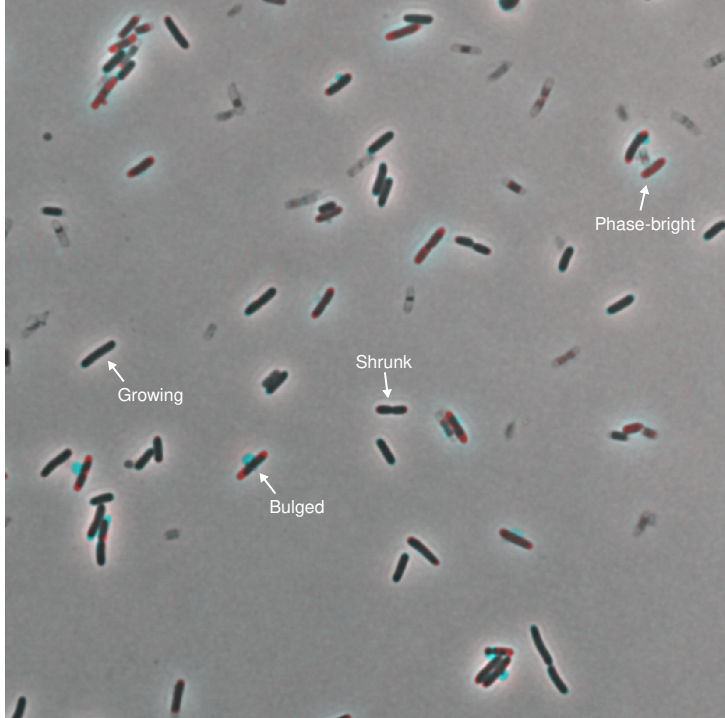

10 min after  
recovery

+

25 min after  
recovery

PBP1b induced 10 min before recovery

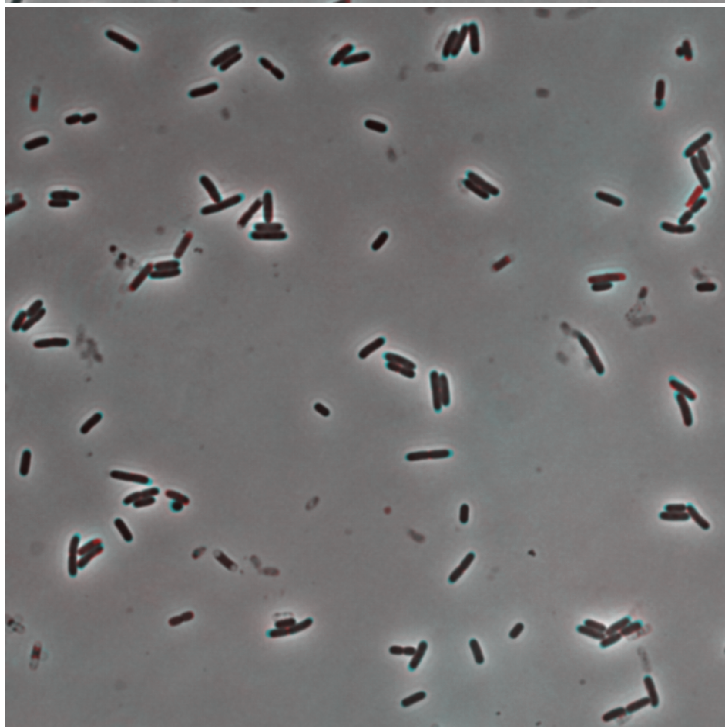

Supplement: supp [file elife-51998-supp-v1.zip]

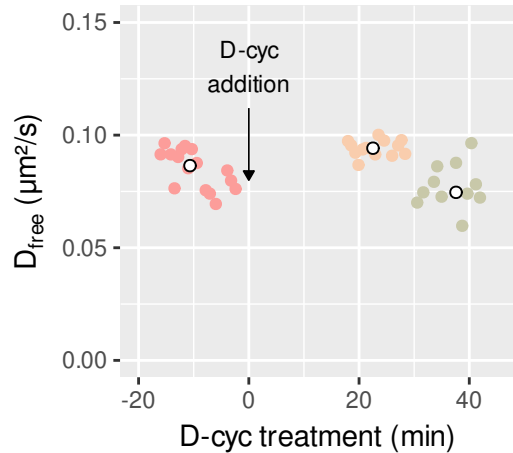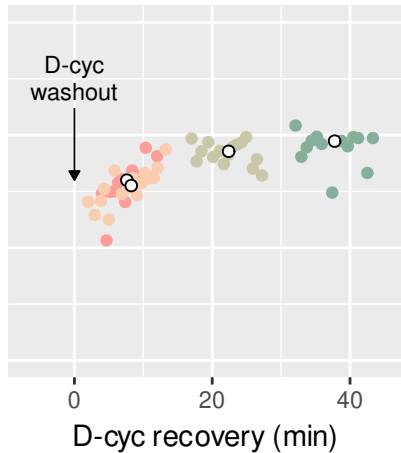

Supplement: supp [file elife-51998-supp-v1.zip]

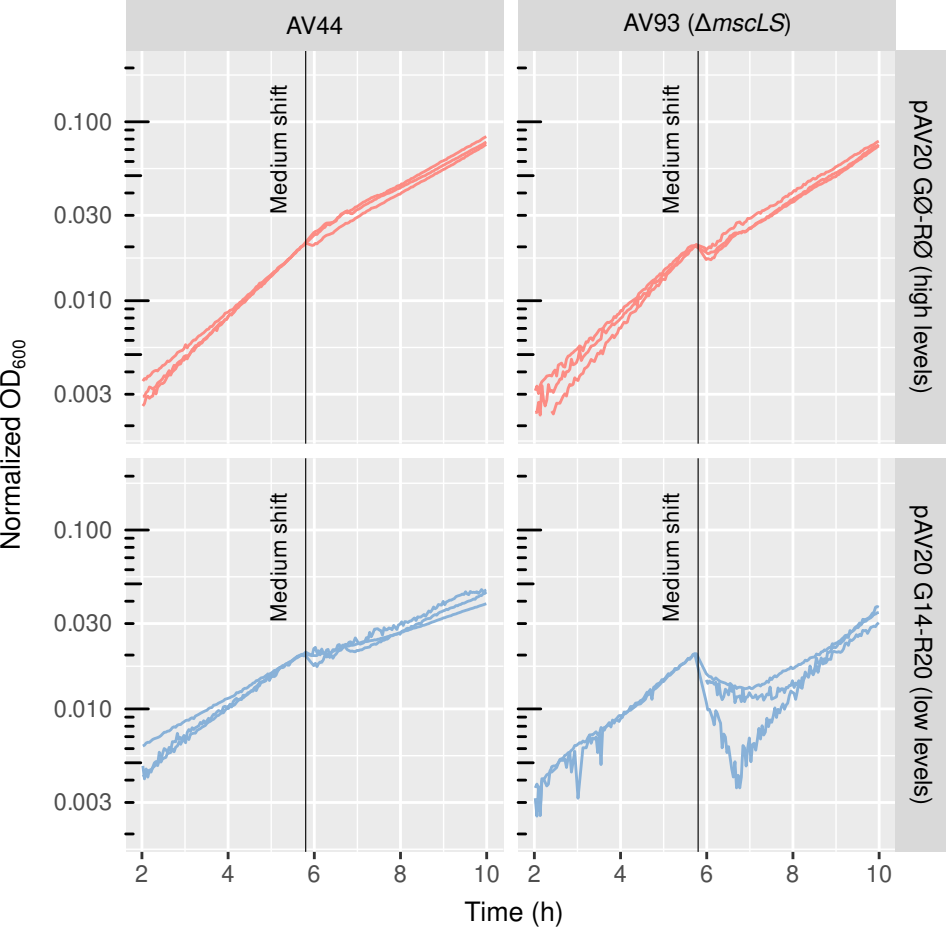

Supplement: supp [file elife-51998-supp-v1.zip]

Relative cell length

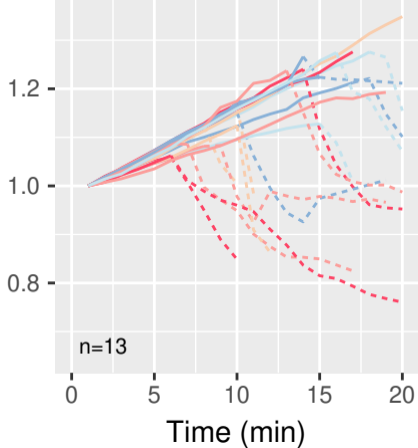

Relative cell diameter

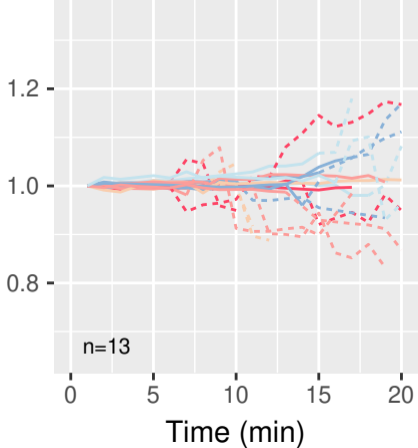

Supplement: supp [file elife-51998-supp-v1.zip › elife_poa_e51998_Figure_1_figure_supplement_5.pdf]

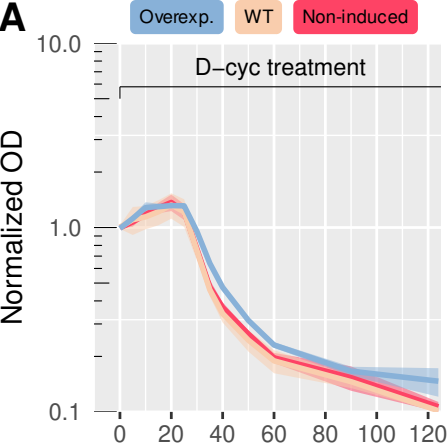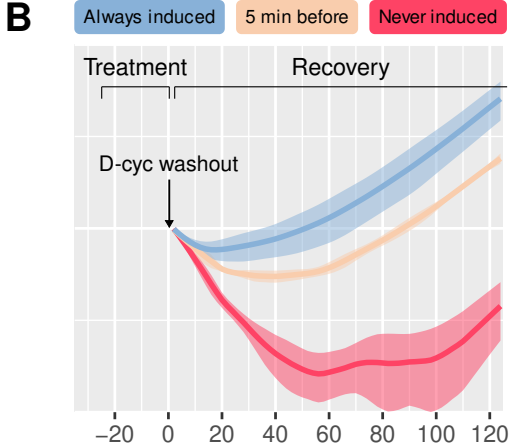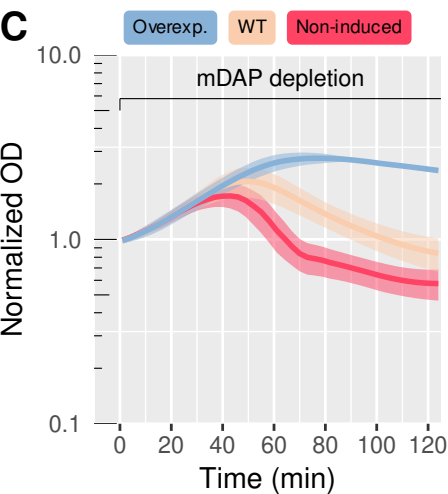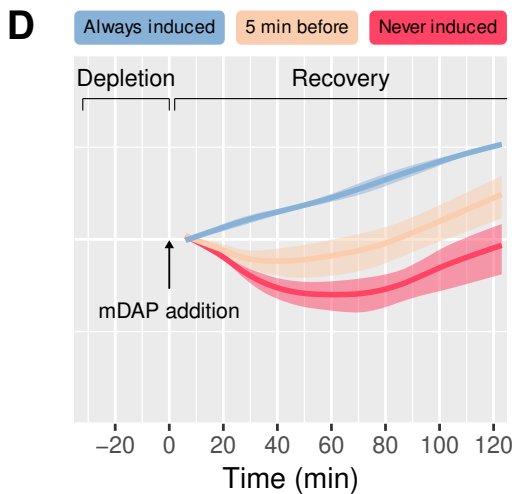

Supplement: supp [file elife-51998-supp-v1.zip › elife_poa_e51998_Figure_3_figure_supplement_3.pdf]

**A**GFP-PBP1b\*, RFP-PBP1a,  $\Delta$ LpoB

GØ-RØ

GØ-R20

G20-R20

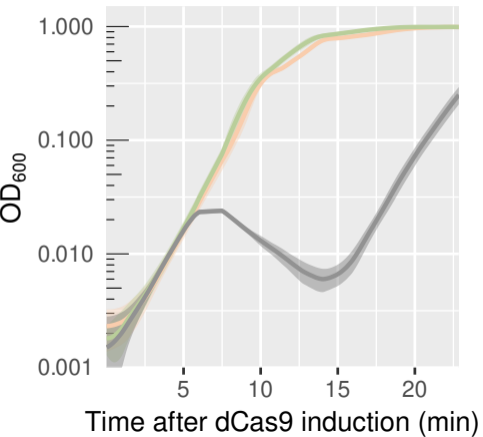**B** $\Delta$ PBP1b

PBP1b

PBP1b\*/ $\Delta$ LpoB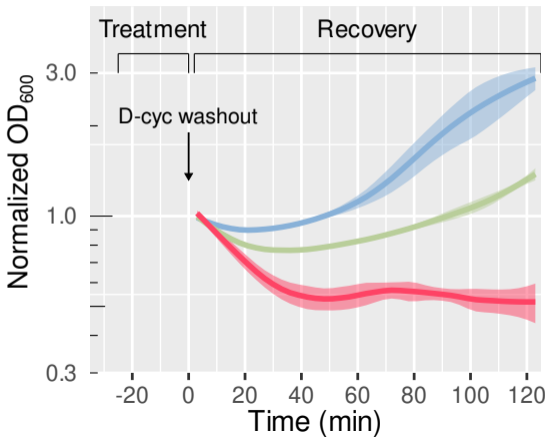

Supplement: supp [file elife-51998-supp-v1.zip › elife_poa_e51998_Figure_3_figure_supplement_6.pdf]

**A**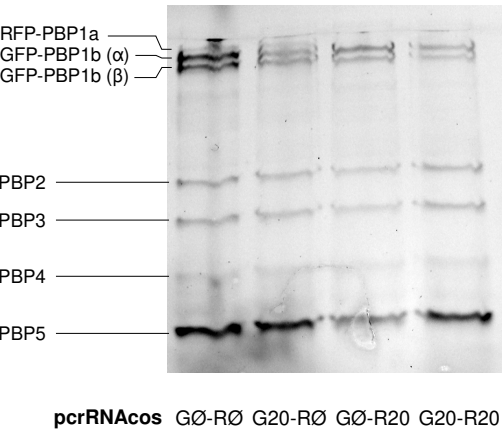**B**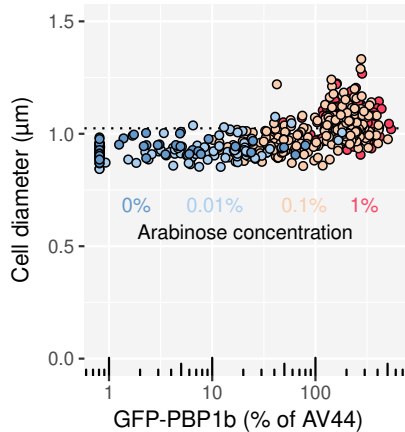**C**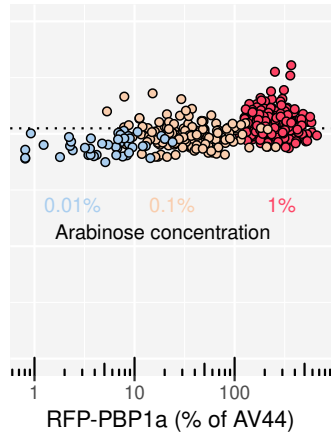

Supplement: supp [file elife-51998-supp-v1.zip › elife_poa_e51998_Figure_1_figure_supplement_2.pdf]

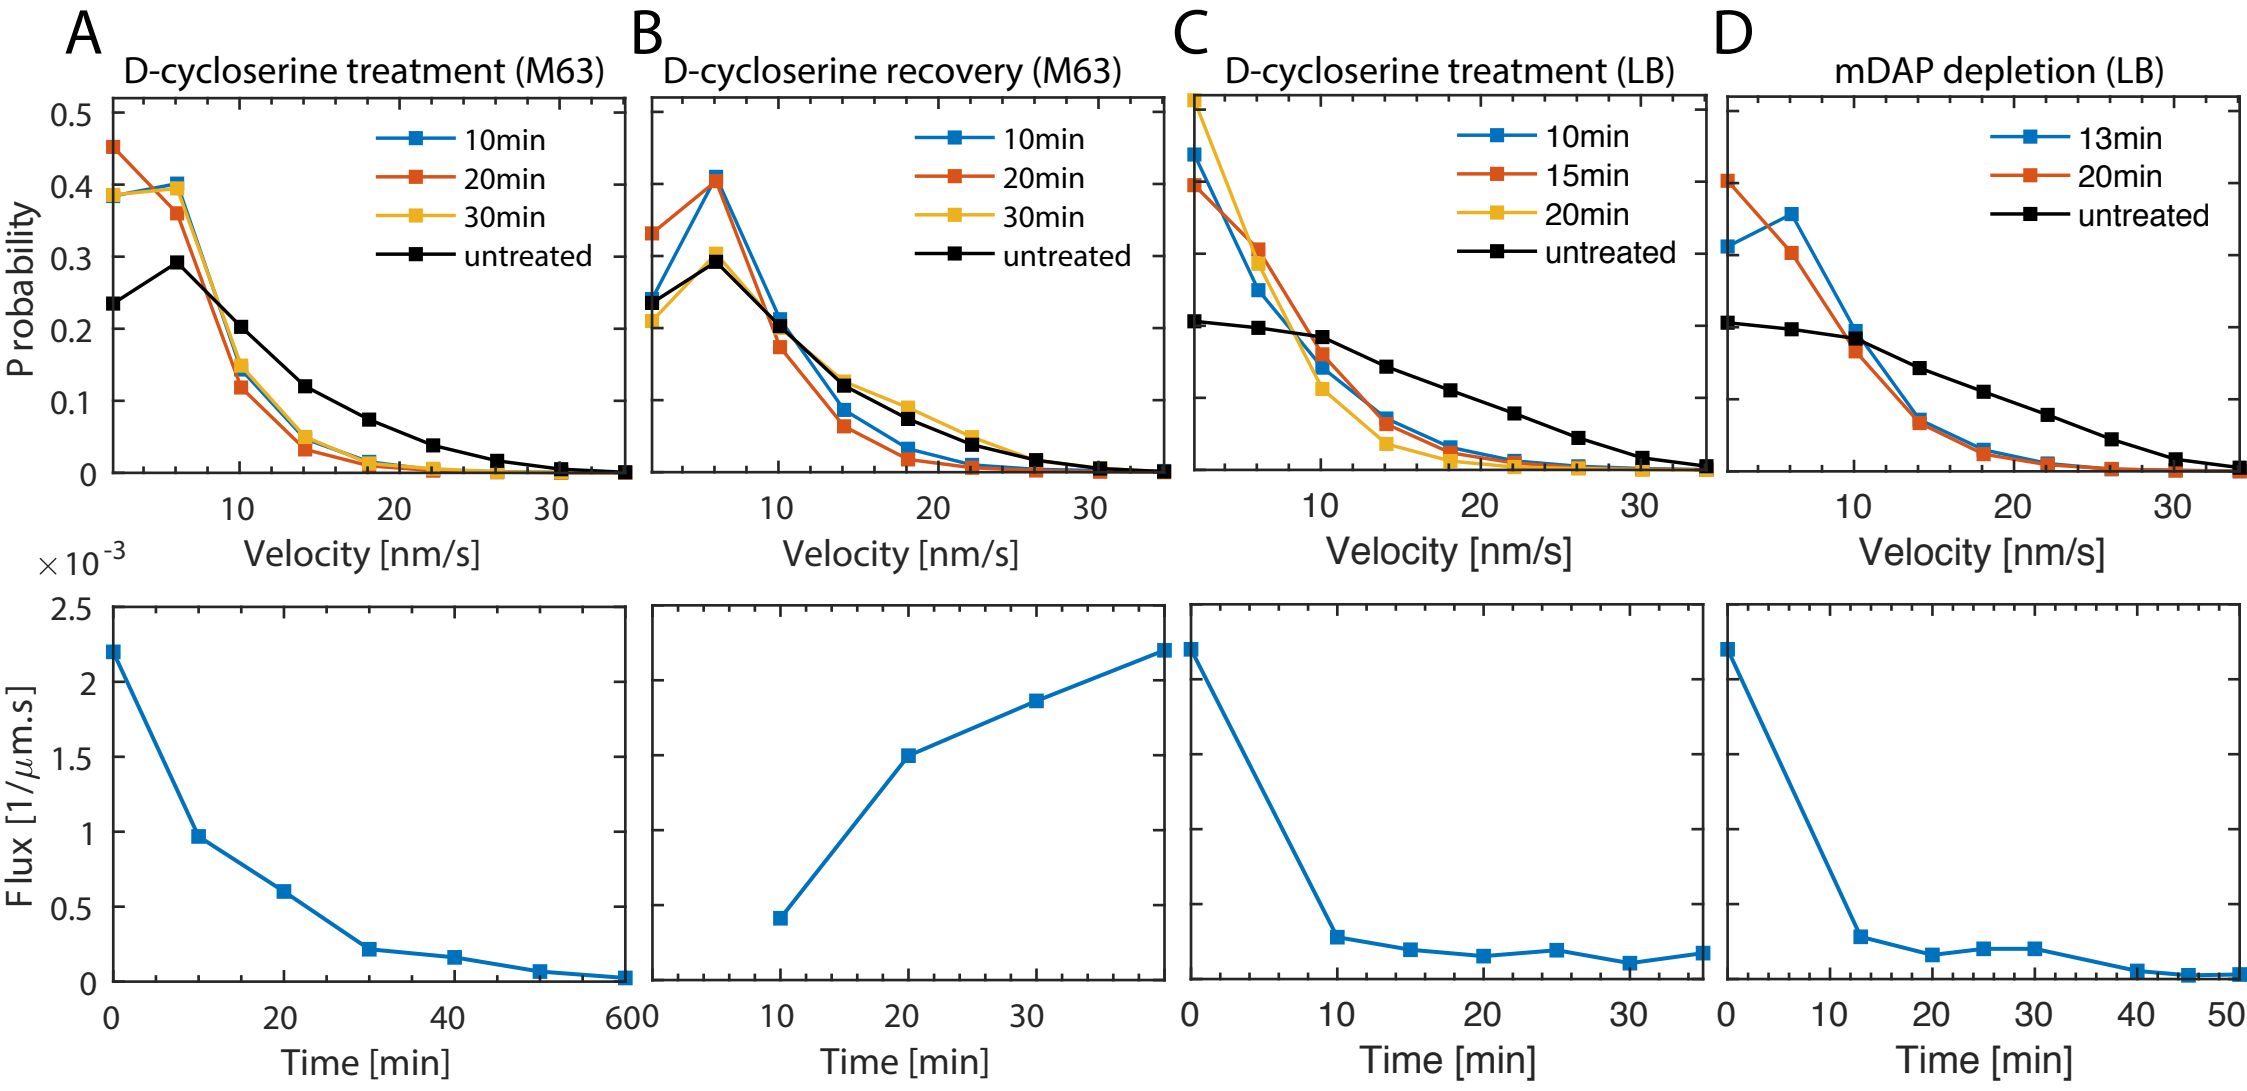

Supplement: supp [file elife-51998-supp-v1.zip › elife_poa_e51998_Figure_3_figure_supplement_1.pdf]

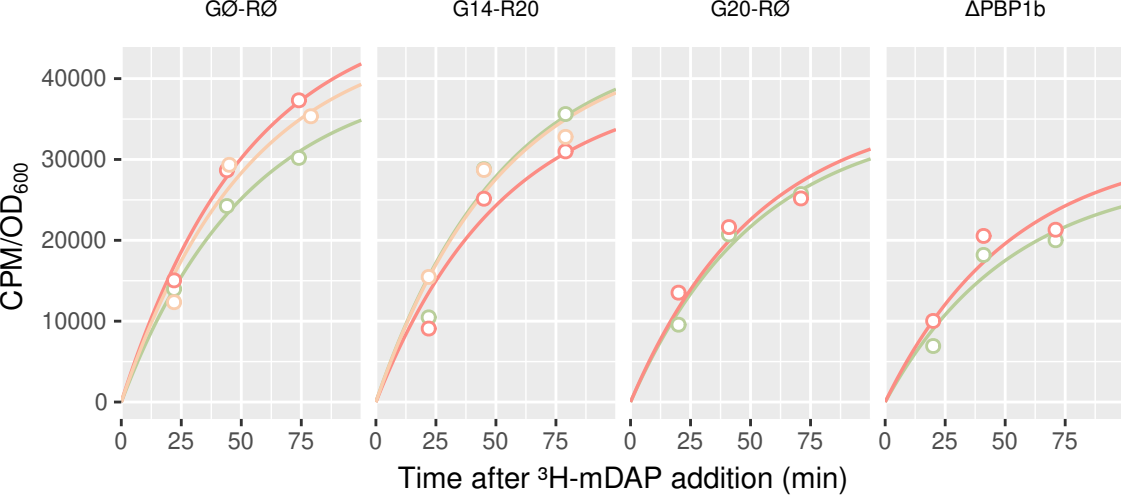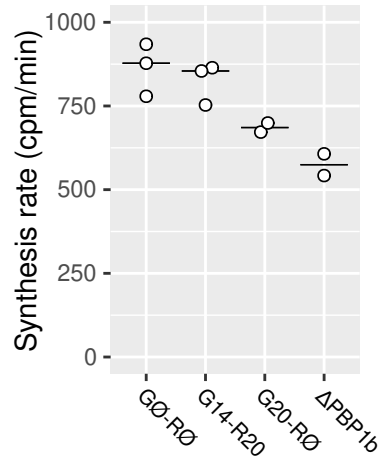

Supplement: supp [file elife-51998-supp-v1.zip › elife_poa_e51998_Figure_2_figure_supplement_1.pdf]

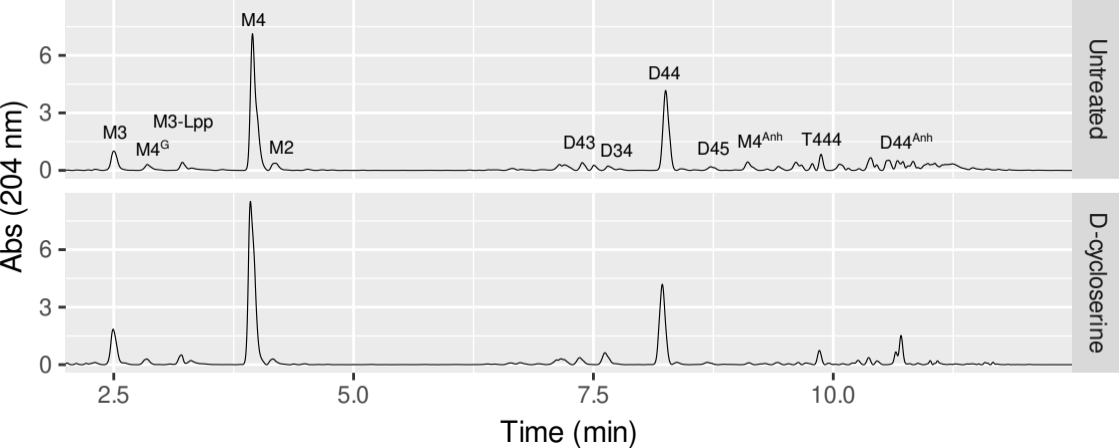

Supplement: supp [file elife-51998-supp-v1.zip › elife_poa_e51998_Figure_3_figure_supplement_2.pdf]

**Bound PBP1b**

(23 steps)

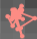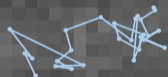

**Free PBP1b**

(27 steps)

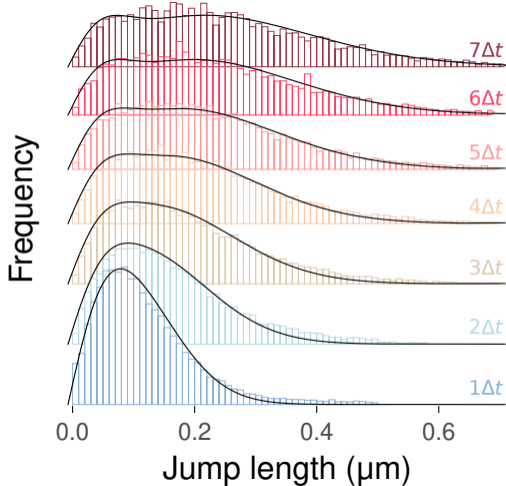

Supplement: supp [file elife-51998-supp-v1.zip › elife_poa_e51998_Figure_4_figure_supplement_1.pdf]

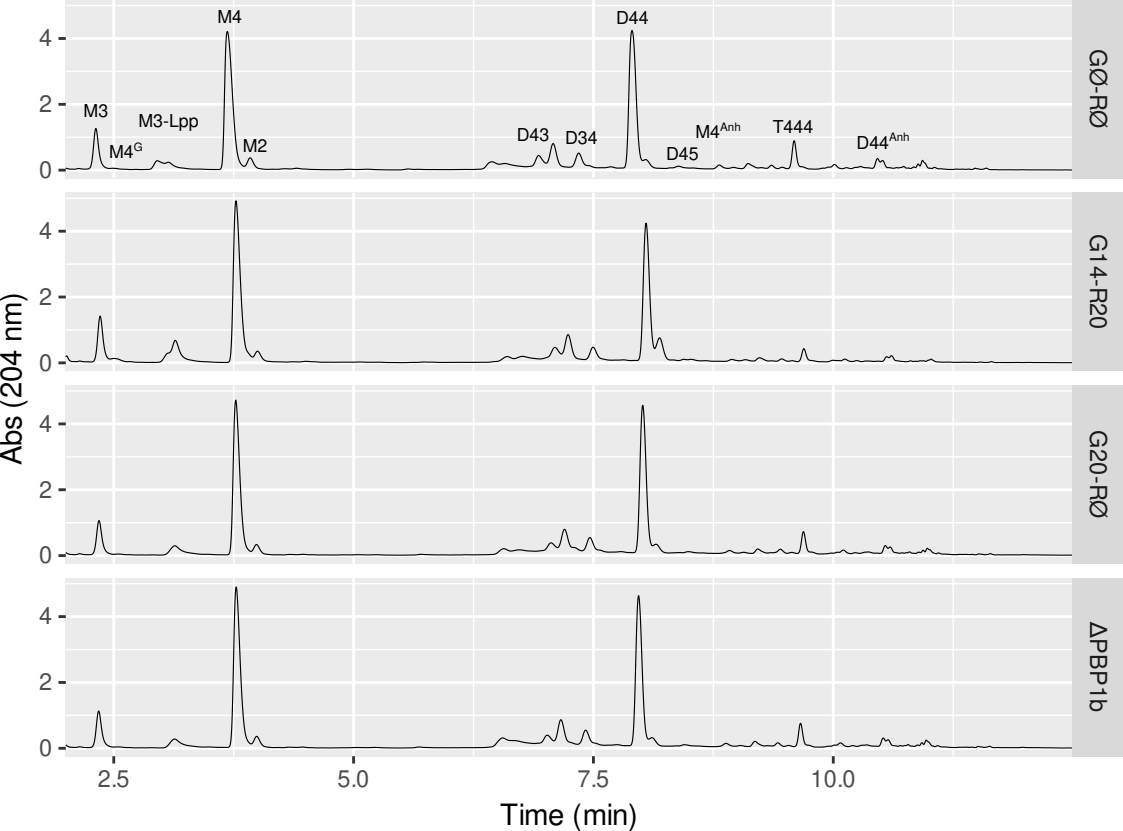

Supplement: supp [file elife-51998-supp-v1.zip › elife_poa_e51998_Figure_2_figure_supplement_2.pdf]

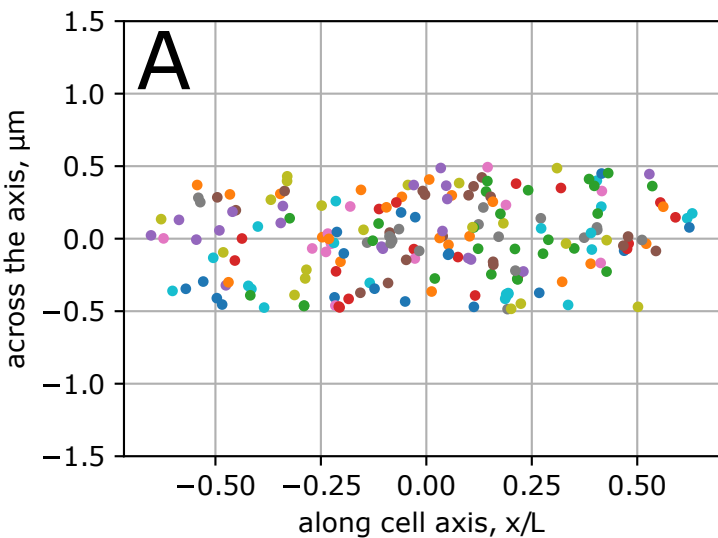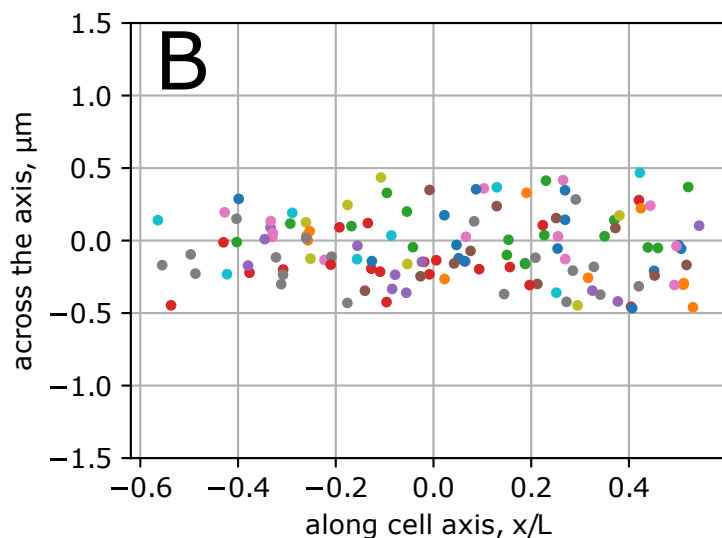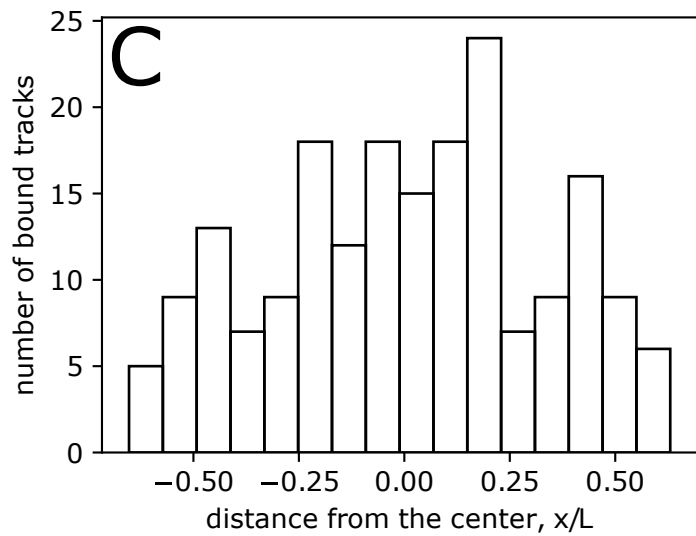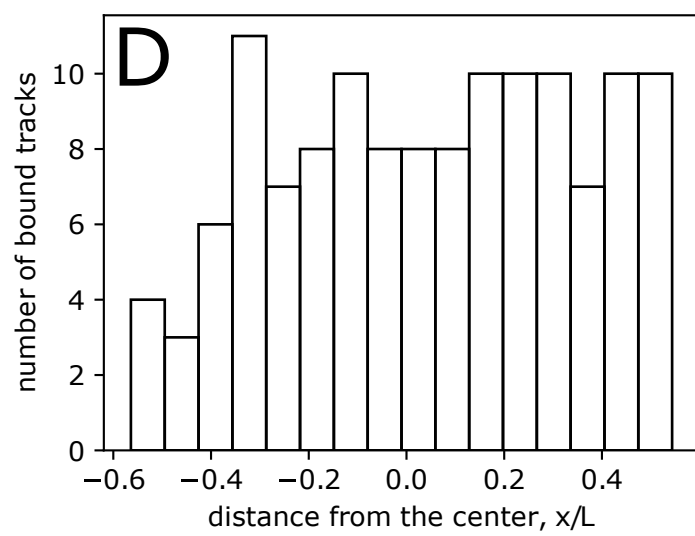

Supplement: supp [file elife-51998-supp-v1.zip › elife_poa_e51998_Figure_4_figure_supplement_2.pdf]

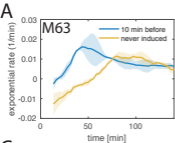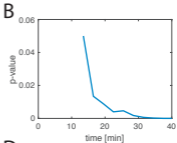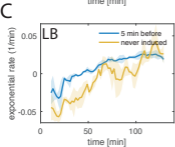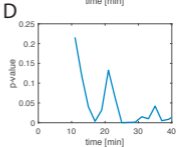

Supplement: supp [file elife-51998-supp-v1.zip › elife_poa_e51998_Figure_3_figure_supplement_5.pdf]

**A****pCRRNacos (crRNA)**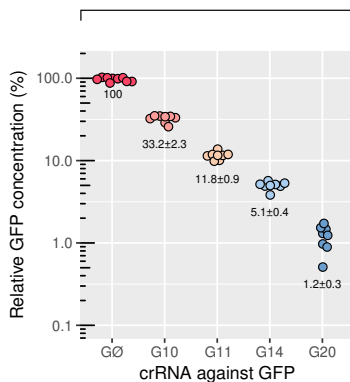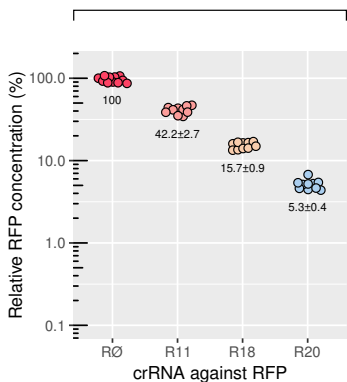**B****pAV20 (sgRNA)**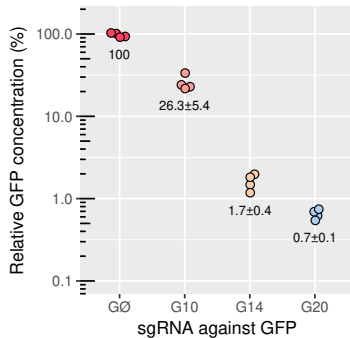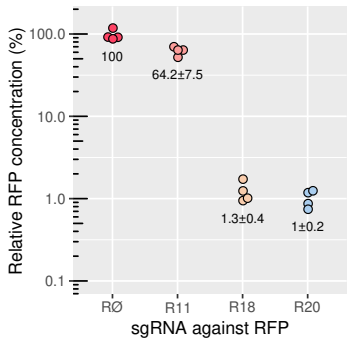

Supplement: supp [file elife-51998-supp-v1.zip › elife_poa_e51998_Figure_1_figure_supplement_1.pdf]

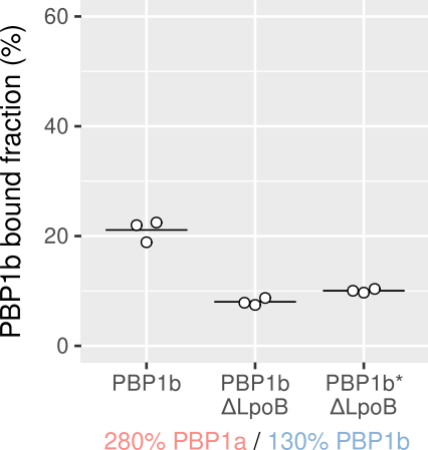

Supplement: supp [file elife-51998-supp-v1.zip › elife_poa_e51998_Figure_4_figure_supplement_4.pdf]
